# Supplementary material for: The perceptual saliency of fearful eyes and smiles: A signal detection study
Source: PLoS One. 2017 Mar 7;12(3):e0173199. doi: 10.1371/journal.pone.0173199 (PMC5340363; doi:10.1371/journal.pone.0173199)
Supplement: S1 Fig — The overall data pertaining to experiment 1. (XLSX) [file pone.0173199.s001.xlsx]

## Sheet: Exp1
E:\Eye Detection Data\NeutralFear_Exp\Exp1 upload.emrg2
This file contained edited data.
ExperimentName	Subject	Age	Sex	Stimuli	face	Expression	canonical	Spatialconfiguration	Eyes	RespFaceNoface.ACC	RespFaceNoface.RT	RespFaceNoface.CRESP	RespFaceNoface.RESP	Target.OnsetToOnsetTime	BackwardMask.OnsetDelay	TargetTime1
Exp V1 Meye Znoeye	10	19	female	Finished stimuli\WF\Neutral\wf_neutral_Face10_noeyestop.jpg	WF	neutral	no	top	no	0	932	z	m	94	4	90
Exp V1 Meye Znoeye	10	19	female	Finished stimuli\MF\Fear\mf_fear_Face05_eyesmiddle.jpg	MF	fear	no	middle	yes	1	522	m	m	93	3	90
Exp V1 Meye Znoeye	10	19	female	Finished stimuli\JJ\Neutral\jj_neutral_Face04_eyesmiddle.jpg	JJ	neutral	no	middle	yes	0	1101	m	z	93	3	90
Exp V1 Meye Znoeye	10	19	female	Finished stimuli\MF\Fear\mf_fear_Face05_eyesbottom.jpg	MF	fear	no	bottom	yes	1	414	m	m	93	3	90
Exp V1 Meye Znoeye	10	19	female	Finished stimuli\nrR\Fear\nrr_fear_Face02_noeyesmiddle.jpg	nr	fear	no	middle	no	1	1889	z	z	93	3	90
Exp V1 Meye Znoeye	10	19	female	Finished stimuli\WF\Fear\wf_fear_Face10_noeyesmiddle.jpg	WF	fear	no	middle	no	1	456	z	z	93	3	90
Exp V1 Meye Znoeye	10	19	female	Finished stimuli\SW\Neutral\sw_neutral_Face06_noeyesbottom.jpg	SW	neutral	no	bottom	no	1	793	z	z	94	4	90
Exp V1 Meye Znoeye	10	19	female	Finished stimuli\WF\Fear\wf_fear_Face10_noeyes.jpg	WF	fear	yes	nm	no	1	923	z	z	93	3	90
Exp V1 Meye Znoeye	10	19	female	Finished stimuli\nrR\Neutral\nrr_neutral_Face02_noeyesmiddle.jpg	nr	neutral	no	middle	no	1	985	z	z	93	3	90
Exp V1 Meye Znoeye	10	19	female	Finished stimuli\PF\Neutral\pf_neutral_Face03_noeyes.jpg	PF	neutral	yes	nm	no	0	634	z	m	93	3	90
Exp V1 Meye Znoeye	10	19	female	Finished stimuli\PF\Neutral\pf_neutral_Face03_eyes.jpg	PF	neutral	yes	nm	yes	1	430	m	m	94	4	90
Exp V1 Meye Znoeye	10	19	female	Finished stimuli\PF\Fear\pf_fear_Face03_eyesmiddle.jpg	PF	fear	no	middle	yes	1	345	m	m	93	3	90
Exp V1 Meye Znoeye	10	19	female	Finished stimuli\nrR\Fear\nrr_fear_Face02_eyesmiddle.jpg	nr	fear	no	middle	yes	1	258	m	m	94	4	90
Exp V1 Meye Znoeye	10	19	female	Finished stimuli\WF\Neutral\wf_neutral_Face10_noeyesmiddle.jpg	WF	neutral	no	middle	no	1	658	z	z	93	3	90
Exp V1 Meye Znoeye	10	19	female	Finished stimuli\MF\Fear\mf_fear_Face05_noeyes.jpg	MF	fear	yes	nm	no	1	987	z	z	93	3	90
Exp V1 Meye Znoeye	10	19	female	Finished stimuli\WF\Fear\wf_fear_Face10_noeyestop.jpg	WF	fear	no	top	no	0	860	z	m	94	4	90
Exp V1 Meye Znoeye	10	19	female	Finished stimuli\PE\Neutral\pe_neutral_Face08_eyesmiddle.jpg	PE	neutral	no	middle	yes	1	349	m	m	94	4	90
Exp V1 Meye Znoeye	10	19	female	Finished stimuli\JJ\Fear\jj_fear_Face04_noeyestop.jpg	JJ	fear	no	top	no	0	688	z	m	93	3	90
Exp V1 Meye Znoeye	10	19	female	Finished stimuli\MF\Neutral\mf_neutral_Face05_eyes.jpg	MF	neutral	yes	nm	yes	1	294	m	m	93	3	90
Exp V1 Meye Znoeye	10	19	female	Finished stimuli\SW\Neutral\sw_neutral_Face06_eyes.jpg	SW	neutral	yes	nm	yes	1	300	m	m	93	3	90
Exp V1 Meye Znoeye	10	19	female	Finished stimuli\nrR\Neutral\nrr_neutral_Face02_noeyesbottom.jpg	nr	neutral	no	bottom	no	1	453	z	z	93	3	90
Exp V1 Meye Znoeye	10	19	female	Finished stimuli\nrR\Fear\nrr_fear_Face02_eyestop.jpg	nr	fear	no	top	yes	1	363	m	m	93	3	90
Exp V1 Meye Znoeye	10	19	female	Finished stimuli\PE\Neutral\pe_neutral_Face08_noeyes.jpg	PE	neutral	yes	nm	no	0	257	z	m	93	3	90
Exp V1 Meye Znoeye	10	19	female	Finished stimuli\SW\Fear\sw_fear_Face06_eyestop.jpg	SW	fear	no	top	yes	1	281	m	m	93	3	90
Exp V1 Meye Znoeye	10	19	female	Finished stimuli\MO\Fear\mo_fear_Face01_noeyesmiddle.jpg	MO	fear	no	middle	no	1	515	z	z	93	3	90																	#DIV/0!
Exp V1 Meye Znoeye	10	19	female	Finished stimuli\nrR\Neutral\nrr_neutral_Face02_eyestop.jpg	nr	neutral	no	top	yes	1	247	m	m	94	4	90
Exp V1 Meye Znoeye	10	19	female	Finished stimuli\JJ\Neutral\jj_neutral_Face04_noeyes.jpg	JJ	neutral	yes	nm	no	0	549	z	m	93	3	90
Exp V1 Meye Znoeye	10	19	female	Finished stimuli\MF\Neutral\mf_neutral_Face05_noeyesmiddle.jpg	MF	neutral	no	middle	no	1	672	z	z	93	3	90
Exp V1 Meye Znoeye	10	19	female	Finished stimuli\nrR\Fear\nrr_fear_Face02_eyes.jpg	nr	fear	yes	nm	yes	1	243	m	m	93	3	90
Exp V1 Meye Znoeye	10	19	female	Finished stimuli\MF\Neutral\mf_neutral_Face05_eyesmiddle.jpg	MF	neutral	no	middle	yes	1	305	m	m	93	3	90
Exp V1 Meye Znoeye	10	19	female	Finished stimuli\SW\Neutral\sw_neutral_Face06_eyesmiddle.jpg	SW	neutral	no	middle	yes	1	266	m	m	94	4	90
Exp V1 Meye Znoeye	10	19	female	Finished stimuli\PE\Neutral\pe_neutral_Face08_noeyestop.jpg	PE	neutral	no	top	no	0	178	z	m	93	3	90
Exp V1 Meye Znoeye	10	19	female	Finished stimuli\MO\Neutral\mo_neutral_Face01_noeyestop.jpg	MO	neutral	no	top	no	0	203	z	m	94	4	90
Exp V1 Meye Znoeye	10	19	female	Finished stimuli\SW\Fear\sw_fear_Face06_noeyes.jpg	SW	fear	yes	nm	no	1	625	z	z	94	4	90
Exp V1 Meye Znoeye	10	19	female	Finished stimuli\WF\Neutral\wf_neutral_Face10_eyes.jpg	WF	neutral	yes	nm	yes	1	369	m	m	93	3	90
Exp V1 Meye Znoeye	10	19	female	Finished stimuli\JJ\Neutral\jj_neutral_Face04_noeyesbottom.jpg	JJ	neutral	no	bottom	no	1	463	z	z	93	3	90
Exp V1 Meye Znoeye	10	19	female	Finished stimuli\JJ\Neutral\jj_neutral_Face04_noeyesmiddle.jpg	JJ	neutral	no	middle	no	1	568	z	z	93	3	90
Exp V1 Meye Znoeye	10	19	female	Finished stimuli\MO\Fear\mo_fear_Face01_eyestop.jpg	MO	fear	no	top	yes	1	366	m	m	93	3	90
Exp V1 Meye Znoeye	10	19	female	Finished stimuli\MF\Neutral\mf_neutral_Face05_noeyesbottom.jpg	MF	neutral	no	bottom	no	1	1820	z	z	93	3	90
Exp V1 Meye Znoeye	10	19	female	Finished stimuli\MF\Fear\mf_fear_Face05_noeyesbottom.jpg	MF	fear	no	bottom	no	1	469	z	z	93	3	90
Exp V1 Meye Znoeye	10	19	female	Finished stimuli\nrR\Neutral\nrr_neutral_Face02_noeyes.jpg	nr	neutral	yes	nm	no	0	361	z	m	94	4	90																	#DIV/0!
Exp V1 Meye Znoeye	10	19	female	Finished stimuli\JJ\Neutral\jj_neutral_Face04_eyestop.jpg	JJ	neutral	no	top	yes	1	499	m	m	93	3	90
Exp V1 Meye Znoeye	10	19	female	Finished stimuli\PF\Neutral\pf_neutral_Face03_noeyesmiddle.jpg	PF	neutral	no	middle	no	1	772	z	z	94	4	90
Exp V1 Meye Znoeye	10	19	female	Finished stimuli\MF\Neutral\mf_neutral_Face05_noeyestop.jpg	MF	neutral	no	top	no	1	570	z	z	94	4	90
Exp V1 Meye Znoeye	10	19	female	Finished stimuli\PF\Fear\pf_fear_Face03_noeyes.jpg	PF	fear	yes	nm	no	0	896	z	m	94	4	90
Exp V1 Meye Znoeye	10	19	female	Finished stimuli\nrR\Fear\nrr_fear_Face02_noeyesbottom.jpg	nr	fear	no	bottom	no	1	489	z	z	94	4	90
Exp V1 Meye Znoeye	10	19	female	Finished stimuli\MO\Neutral\mo_neutral_Face01_noeyesmiddle.jpg	MO	neutral	no	middle	no	1	527	z	z	94	4	90
Exp V1 Meye Znoeye	10	19	female	Finished stimuli\nrR\Fear\nrr_fear_Face02_noeyes.jpg	nr	fear	yes	nm	no	1	725	z	z	94	4	90
Exp V1 Meye Znoeye	10	19	female	Finished stimuli\PF\Fear\pf_fear_Face03_eyes.jpg	PF	fear	yes	nm	yes	1	291	m	m	94	4	90
Exp V1 Meye Znoeye	10	19	female	Finished stimuli\JJ\Neutral\jj_neutral_Face04_eyes.jpg	JJ	neutral	yes	nm	yes	1	289	m	m	94	4	90
Exp V1 Meye Znoeye	10	19	female	Finished stimuli\MO\Neutral\mo_neutral_Face01_eyes.jpg	MO	neutral	yes	nm	yes	1	287	m	m	94	4	90
Exp V1 Meye Znoeye	10	19	female	Finished stimuli\MO\Neutral\mo_neutral_Face01_noeyesbottom.jpg	MO	neutral	no	bottom	no	1	445	z	z	93	3	90
Exp V1 Meye Znoeye	10	19	female	Finished stimuli\MO\Fear\mo_fear_Face01_eyes.jpg	MO	fear	yes	nm	yes	1	242	m	m	93	3	90
Exp V1 Meye Znoeye	10	19	female	Finished stimuli\MO\Fear\mo_fear_Face01_eyesbottom.jpg	MO	fear	no	bottom	yes	1	224	m	m	93	3	90
Exp V1 Meye Znoeye	10	19	female	Finished stimuli\PF\Fear\pf_fear_Face03_eyesbottom.jpg	PF	fear	no	bottom	yes	1	161	m	m	93	3	90
Exp V1 Meye Znoeye	10	19	female	Finished stimuli\PF\Fear\pf_fear_Face03_noeyesbottom.jpg	PF	fear	no	bottom	no	1	764	z	z	93	3	90
Exp V1 Meye Znoeye	10	19	female	Finished stimuli\nrR\Neutral\nrr_neutral_Face02_eyes.jpg	nr	neutral	yes	nm	yes	1	282	m	m	93	3	90
Exp V1 Meye Znoeye	10	19	female	Finished stimuli\SW\Fear\sw_fear_Face06_noeyesmiddle.jpg	SW	fear	no	middle	no	1	344	z	z	93	3	90
Exp V1 Meye Znoeye	10	19	female	Finished stimuli\MF\Neutral\mf_neutral_Face05_noeyes.jpg	MF	neutral	yes	nm	no	0	224	z	m	94	4	90
Exp V1 Meye Znoeye	10	19	female	Finished stimuli\SW\Fear\sw_fear_Face06_eyesbottom.jpg	SW	fear	no	bottom	yes	1	184	m	m	93	3	90
Exp V1 Meye Znoeye	10	19	female	Finished stimuli\PF\Fear\pf_fear_Face03_eyestop.jpg	PF	fear	no	top	yes	1	265	m	m	94	4	90
Exp V1 Meye Znoeye	10	19	female	Finished stimuli\PE\Neutral\pe_neutral_Face08_eyes.jpg	PE	neutral	yes	nm	yes	1	545	m	m	93	3	90
Exp V1 Meye Znoeye	10	19	female	Finished stimuli\MO\Fear\mo_fear_Face01_noeyesbottom.jpg	MO	fear	no	bottom	no	0	674	z	m	93	3	90
Exp V1 Meye Znoeye	10	19	female	Finished stimuli\WF\Neutral\wf_neutral_Face10_eyesbottom.jpg	WF	neutral	no	bottom	yes	1	429	m	m	93	3	90
Exp V1 Meye Znoeye	10	19	female	Finished stimuli\PF\Neutral\pf_neutral_Face03_eyesmiddle.jpg	PF	neutral	no	middle	yes	1	441	m	m	94	4	90
Exp V1 Meye Znoeye	10	19	female	Finished stimuli\JJ\Fear\jj_fear_Face04_noeyesbottom.jpg	JJ	fear	no	bottom	no	1	1212	z	z	93	3	90
Exp V1 Meye Znoeye	10	19	female	Finished stimuli\nrR\Neutral\nrr_neutral_Face02_noeyestop.jpg	nr	neutral	no	top	no	0	202	z	m	93	3	90
Exp V1 Meye Znoeye	10	19	female	Finished stimuli\PE\Fear\pe_fear_Face08_eyestop.jpg	PE	fear	no	top	yes	1	232	m	m	93	3	90
Exp V1 Meye Znoeye	10	19	female	Finished stimuli\SW\Neutral\sw_neutral_Face06_eyesbottom.jpg	SW	neutral	no	bottom	yes	1	340	m	m	93	3	90
Exp V1 Meye Znoeye	10	19	female	Finished stimuli\PF\Fear\pf_fear_Face03_noeyesmiddle.jpg	PF	fear	no	middle	no	1	548	z	z	93	3	90
Exp V1 Meye Znoeye	10	19	female	Finished stimuli\PE\Fear\pe_fear_Face08_noeyestop.jpg	PE	fear	no	top	no	1	797	z	z	94	4	90
Exp V1 Meye Znoeye	10	19	female	Finished stimuli\WF\Neutral\wf_neutral_Face10_noeyes.jpg	WF	neutral	yes	nm	no	0	352	z	m	93	3	90
Exp V1 Meye Znoeye	10	19	female	Finished stimuli\PE\Neutral\pe_neutral_Face08_noeyesbottom.jpg	PE	neutral	no	bottom	no	1	364	z	z	93	3	90
Exp V1 Meye Znoeye	10	19	female	Finished stimuli\WF\Neutral\wf_neutral_Face10_noeyesbottom.jpg	WF	neutral	no	bottom	no	1	361	z	z	93	3	90
Exp V1 Meye Znoeye	10	19	female	Finished stimuli\SW\Fear\sw_fear_Face06_noeyesbottom.jpg	SW	fear	no	bottom	no	1	325	z	z	94	4	90
Exp V1 Meye Znoeye	10	19	female	Finished stimuli\JJ\Fear\jj_fear_Face04_noeyesmiddle.jpg	JJ	fear	no	middle	no	1	347	z	z	94	4	90
Exp V1 Meye Znoeye	10	19	female	Finished stimuli\WF\Neutral\wf_neutral_Face10_eyesmiddle.jpg	WF	neutral	no	middle	yes	1	306	m	m	93	3	90
Exp V1 Meye Znoeye	10	19	female	Finished stimuli\PE\Neutral\pe_neutral_Face08_noeyesmiddle.jpg	PE	neutral	no	middle	no	1	475	z	z	94	4	90
Exp V1 Meye Znoeye	10	19	female	Finished stimuli\nrR\Fear\nrr_fear_Face02_noeyestop.jpg	nr	fear	no	top	no	0	1030	z	m	93	3	90
Exp V1 Meye Znoeye	10	19	female	Finished stimuli\WF\Fear\wf_fear_Face10_eyesbottom.jpg	WF	fear	no	bottom	yes	1	314	m	m	94	4	90
Exp V1 Meye Znoeye	10	19	female	Finished stimuli\MF\Fear\mf_fear_Face05_eyestop.jpg	MF	fear	no	top	yes	1	269	m	m	93	3	90
Exp V1 Meye Znoeye	10	19	female	Finished stimuli\MO\Neutral\mo_neutral_Face01_eyestop.jpg	MO	neutral	no	top	yes	1	272	m	m	93	3	90
Exp V1 Meye Znoeye	10	19	female	Finished stimuli\PE\Fear\pe_fear_Face08_noeyesmiddle.jpg	PE	fear	no	middle	no	1	676	z	z	93	3	90
Exp V1 Meye Znoeye	10	19	female	Finished stimuli\SW\Fear\sw_fear_Face06_eyes.jpg	SW	fear	yes	nm	yes	1	287	m	m	93	3	90
Exp V1 Meye Znoeye	10	19	female	Finished stimuli\MF\Fear\mf_fear_Face05_noeyestop.jpg	MF	fear	no	top	no	0	501	z	m	94	4	90
Exp V1 Meye Znoeye	10	19	female	Finished stimuli\MO\Fear\mo_fear_Face01_eyesmiddle.jpg	MO	fear	no	middle	yes	1	222	m	m	93	3	90
Exp V1 Meye Znoeye	10	19	female	Finished stimuli\SW\Neutral\sw_neutral_Face06_noeyesmiddle.jpg	SW	neutral	no	middle	no	1	350	z	z	93	3	90
Exp V1 Meye Znoeye	10	19	female	Finished stimuli\PF\Neutral\pf_neutral_Face03_noeyestop.jpg	PF	neutral	no	top	no	1	521	z	z	93	3	90
Exp V1 Meye Znoeye	10	19	female	Finished stimuli\PF\Neutral\pf_neutral_Face03_eyestop.jpg	PF	neutral	no	top	yes	1	245	m	m	94	4	90
Exp V1 Meye Znoeye	10	19	female	Finished stimuli\MO\Fear\mo_fear_Face01_noeyestop.jpg	MO	fear	no	top	no	0	1059	z	m	93	3	90
Exp V1 Meye Znoeye	10	19	female	Finished stimuli\JJ\Fear\jj_fear_Face04_noeyes.jpg	JJ	fear	yes	nm	no	1	652	z	z	93	3	90
Exp V1 Meye Znoeye	10	19	female	Finished stimuli\JJ\Fear\jj_fear_Face04_eyestop.jpg	JJ	fear	no	top	yes	1	226	m	m	93	3	90
Exp V1 Meye Znoeye	10	19	female	Finished stimuli\PE\Fear\pe_fear_Face08_eyesmiddle.jpg	PE	fear	no	middle	yes	1	282	m	m	93	3	90
Exp V1 Meye Znoeye	10	19	female	Finished stimuli\JJ\Fear\jj_fear_Face04_eyes.jpg	JJ	fear	yes	nm	yes	1	207	m	m	93	3	90
Exp V1 Meye Znoeye	10	19	female	Finished stimuli\MO\Fear\mo_fear_Face01_noeyes.jpg	MO	fear	yes	nm	no	0	517	z	m	93	3	90
Exp V1 Meye Znoeye	10	19	female	Finished stimuli\PE\Fear\pe_fear_Face08_eyesbottom.jpg	PE	fear	no	bottom	yes	1	760	m	m	93	3	90
Exp V1 Meye Znoeye	10	19	female	Finished stimuli\PE\Fear\pe_fear_Face08_noeyes.jpg	PE	fear	yes	nm	no	0	604	z	m	94	4	90
Exp V1 Meye Znoeye	10	19	female	Finished stimuli\SW\Neutral\sw_neutral_Face06_noeyes.jpg	SW	neutral	yes	nm	no	0	346	z	m	94	4	90
Exp V1 Meye Znoeye	10	19	female	Finished stimuli\SW\Fear\sw_fear_Face06_eyesmiddle.jpg	SW	fear	no	middle	yes	1	170	m	m	93	3	90
Exp V1 Meye Znoeye	10	19	female	Finished stimuli\WF\Fear\wf_fear_Face10_eyes.jpg	WF	fear	yes	nm	yes	1	272	m	m	93	3	90
Exp V1 Meye Znoeye	10	19	female	Finished stimuli\MF\Fear\mf_fear_Face05_noeyesmiddle.jpg	MF	fear	no	middle	no	0	595	z	m	93	3	90
Exp V1 Meye Znoeye	10	19	female	Finished stimuli\JJ\Fear\jj_fear_Face04_eyesmiddle.jpg	JJ	fear	no	middle	yes	1	87	m	m	94	4	90
Exp V1 Meye Znoeye	10	19	female	Finished stimuli\nrR\Neutral\nrr_neutral_Face02_eyesmiddle.jpg	nr	neutral	no	middle	yes	1	253	m	m	94	4	90
Exp V1 Meye Znoeye	10	19	female	Finished stimuli\PE\Fear\pe_fear_Face08_eyes.jpg	PE	fear	yes	nm	yes	1	211	m	m	93	3	90
Exp V1 Meye Znoeye	10	19	female	Finished stimuli\MO\Neutral\mo_neutral_Face01_noeyes.jpg	MO	neutral	yes	nm	no	0	192	z	m	93	3	90
Exp V1 Meye Znoeye	10	19	female	Finished stimuli\WF\Fear\wf_fear_Face10_eyesmiddle.jpg	WF	fear	no	middle	yes	1	76	m	m	93	3	90
Exp V1 Meye Znoeye	10	19	female	Finished stimuli\PF\Neutral\pf_neutral_Face03_noeyesbottom.jpg	PF	neutral	no	bottom	no	1	535	z	z	94	4	90
Exp V1 Meye Znoeye	10	19	female	Finished stimuli\PE\Fear\pe_fear_Face08_noeyesbottom.jpg	PE	fear	no	bottom	no	1	325	z	z	94	4	90
Exp V1 Meye Znoeye	10	19	female	Finished stimuli\MF\Fear\mf_fear_Face05_eyes.jpg	MF	fear	yes	nm	yes	1	267	m	m	94	4	90
Exp V1 Meye Znoeye	10	19	female	Finished stimuli\WF\Fear\wf_fear_Face10_eyestop.jpg	WF	fear	no	top	yes	1	195	m	m	93	3	90
Exp V1 Meye Znoeye	10	19	female	Finished stimuli\JJ\Neutral\jj_neutral_Face04_eyesbottom.jpg	JJ	neutral	no	bottom	yes	1	238	m	m	93	3	90
Exp V1 Meye Znoeye	10	19	female	Finished stimuli\MF\Neutral\mf_neutral_Face05_eyestop.jpg	MF	neutral	no	top	yes	1	210	m	m	94	4	90
Exp V1 Meye Znoeye	10	19	female	Finished stimuli\PF\Neutral\pf_neutral_Face03_eyesbottom.jpg	PF	neutral	no	bottom	yes	1	439	m	m	93	3	90
Exp V1 Meye Znoeye	10	19	female	Finished stimuli\MO\Neutral\mo_neutral_Face01_eyesbottom.jpg	MO	neutral	no	bottom	yes	1	322	m	m	94	4	90
Exp V1 Meye Znoeye	10	19	female	Finished stimuli\JJ\Fear\jj_fear_Face04_eyesbottom.jpg	JJ	fear	no	bottom	yes	1	200	m	m	94	4	90
Exp V1 Meye Znoeye	10	19	female	Finished stimuli\MF\Neutral\mf_neutral_Face05_eyesbottom.jpg	MF	neutral	no	bottom	yes	1	331	m	m	93	3	90
Exp V1 Meye Znoeye	10	19	female	Finished stimuli\nrR\Neutral\nrr_neutral_Face02_eyesbottom.jpg	nr	neutral	no	bottom	yes	1	329	m	m	94	4	90
Exp V1 Meye Znoeye	10	19	female	Finished stimuli\WF\Neutral\wf_neutral_Face10_eyestop.jpg	WF	neutral	no	top	yes	1	199	m	m	94	4	90
Exp V1 Meye Znoeye	10	19	female	Finished stimuli\PE\Neutral\pe_neutral_Face08_eyestop.jpg	PE	neutral	no	top	yes	1	1114	m	m	93	3	90
Exp V1 Meye Znoeye	10	19	female	Finished stimuli\SW\Neutral\sw_neutral_Face06_eyestop.jpg	SW	neutral	no	top	yes	1	310	m	m	94	4	90
Exp V1 Meye Znoeye	10	19	female	Finished stimuli\nrR\Fear\nrr_fear_Face02_eyesbottom.jpg	nr	fear	no	bottom	yes	1	321	m	m	94	4	90
Exp V1 Meye Znoeye	10	19	female	Finished stimuli\WF\Fear\wf_fear_Face10_noeyesbottom.jpg	WF	fear	no	bottom	no	1	532	z	z	93	3	90
Exp V1 Meye Znoeye	10	19	female	Finished stimuli\PE\Neutral\pe_neutral_Face08_eyesbottom.jpg	PE	neutral	no	bottom	yes	1	418	m	m	93	3	90
Exp V1 Meye Znoeye	10	19	female	Finished stimuli\MO\Neutral\mo_neutral_Face01_eyesmiddle.jpg	MO	neutral	no	middle	yes	0	571	m	z	94	4	90
Exp V1 Meye Znoeye	10	19	female	Finished stimuli\SW\Neutral\sw_neutral_Face06_noeyestop.jpg	SW	neutral	no	top	no	1	585	z	z	94	4	90
Exp V1 Meye Znoeye	10	19	female	Finished stimuli\JJ\Neutral\jj_neutral_Face04_noeyestop.jpg	JJ	neutral	no	top	no	1	578	z	z	93	3	90
Exp V1 Meye Znoeye	10	19	female	Finished stimuli\PF\Fear\pf_fear_Face03_noeyestop.jpg	PF	fear	no	top	no	1	666	z	z	93	3	90
Exp V1 Meye Znoeye	10	19	female	Finished stimuli\SW\Fear\sw_fear_Face06_noeyestop.jpg	SW	fear	no	top	no	0	755	z	m	93	3	90
Exp V1 Meye Znoeye	10	19	female	Finished stimuli\PE\Neutral\pe_neutral_Face08_noeyesmiddle.jpg	PE	neutral	no	middle	no	1	699	z	z	93	3	90
Exp V1 Meye Znoeye	10	19	female	Finished stimuli\PF\Neutral\pf_neutral_Face03_eyes.jpg	PF	neutral	yes	nm	yes	1	268	m	m	93	3	90
Exp V1 Meye Znoeye	10	19	female	Finished stimuli\MF\Neutral\mf_neutral_Face05_noeyesmiddle.jpg	MF	neutral	no	middle	no	0	55	z	m	93	3	90
Exp V1 Meye Znoeye	10	19	female	Finished stimuli\WF\Fear\wf_fear_Face10_eyes.jpg	WF	fear	yes	nm	yes	1	181	m	m	93	3	90
Exp V1 Meye Znoeye	10	19	female	Finished stimuli\MF\Fear\mf_fear_Face05_eyesmiddle.jpg	MF	fear	no	middle	yes	1	86	m	m	94	4	90
Exp V1 Meye Znoeye	10	19	female	Finished stimuli\SW\Neutral\sw_neutral_Face06_noeyestop.jpg	SW	neutral	no	top	no	0	67	z	m	93	3	90
Exp V1 Meye Znoeye	10	19	female	Finished stimuli\nrR\Neutral\nrr_neutral_Face02_noeyestop.jpg	nr	neutral	no	top	no	0	84	z	m	93	3	90
Exp V1 Meye Znoeye	10	19	female	Finished stimuli\PF\Fear\pf_fear_Face03_noeyesbottom.jpg	PF	fear	no	bottom	no	1	266	z	z	94	4	90
Exp V1 Meye Znoeye	10	19	female	Finished stimuli\WF\Neutral\wf_neutral_Face10_eyes.jpg	WF	neutral	yes	nm	yes	1	274	m	m	93	3	90
Exp V1 Meye Znoeye	10	19	female	Finished stimuli\MF\Neutral\mf_neutral_Face05_noeyestop.jpg	MF	neutral	no	top	no	1	230	z	z	93	3	90
Exp V1 Meye Znoeye	10	19	female	Finished stimuli\PE\Fear\pe_fear_Face08_eyesbottom.jpg	PE	fear	no	bottom	yes	1	233	m	m	94	4	90
Exp V1 Meye Znoeye	10	19	female	Finished stimuli\MF\Fear\mf_fear_Face05_noeyes.jpg	MF	fear	yes	nm	no	0	164	z	m	93	3	90
Exp V1 Meye Znoeye	10	19	female	Finished stimuli\MF\Fear\mf_fear_Face05_noeyesmiddle.jpg	MF	fear	no	middle	no	1	210	z	z	94	4	90
Exp V1 Meye Znoeye	10	19	female	Finished stimuli\SW\Neutral\sw_neutral_Face06_noeyesbottom.jpg	SW	neutral	no	bottom	no	1	224	z	z	94	4	90
Exp V1 Meye Znoeye	10	19	female	Finished stimuli\MF\Fear\mf_fear_Face05_eyestop.jpg	MF	fear	no	top	yes	1	312	m	m	93	3	90
Exp V1 Meye Znoeye	10	19	female	Finished stimuli\MO\Neutral\mo_neutral_Face01_noeyestop.jpg	MO	neutral	no	top	no	0	243	z	m	93	3	90
Exp V1 Meye Znoeye	10	19	female	Finished stimuli\PE\Neutral\pe_neutral_Face08_eyes.jpg	PE	neutral	yes	nm	yes	1	297	m	m	93	3	90
Exp V1 Meye Znoeye	10	19	female	Finished stimuli\MF\Neutral\mf_neutral_Face05_eyestop.jpg	MF	neutral	no	top	yes	1	234	m	m	93	3	90
Exp V1 Meye Znoeye	10	19	female	Finished stimuli\MF\Fear\mf_fear_Face05_eyes.jpg	MF	fear	yes	nm	yes	1	197	m	m	93	3	90
Exp V1 Meye Znoeye	10	19	female	Finished stimuli\SW\Fear\sw_fear_Face06_noeyestop.jpg	SW	fear	no	top	no	1	352	z	z	93	3	90
Exp V1 Meye Znoeye	10	19	female	Finished stimuli\MF\Fear\mf_fear_Face05_noeyesbottom.jpg	MF	fear	no	bottom	no	1	491	z	z	93	3	90
Exp V1 Meye Znoeye	10	19	female	Finished stimuli\MO\Fear\mo_fear_Face01_noeyesbottom.jpg	MO	fear	no	bottom	no	1	193	z	z	93	3	90
Exp V1 Meye Znoeye	10	19	female	Finished stimuli\PF\Fear\pf_fear_Face03_noeyestop.jpg	PF	fear	no	top	no	1	404	z	z	94	4	90
Exp V1 Meye Znoeye	10	19	female	Finished stimuli\MO\Neutral\mo_neutral_Face01_noeyesbottom.jpg	MO	neutral	no	bottom	no	1	434	z	z	94	4	90
Exp V1 Meye Znoeye	10	19	female	Finished stimuli\JJ\Neutral\jj_neutral_Face04_eyesbottom.jpg	JJ	neutral	no	bottom	yes	1	357	m	m	93	3	90
Exp V1 Meye Znoeye	10	19	female	Finished stimuli\WF\Fear\wf_fear_Face10_noeyes.jpg	WF	fear	yes	nm	no	1	784	z	z	93	3	90
Exp V1 Meye Znoeye	10	19	female	Finished stimuli\PF\Fear\pf_fear_Face03_eyesmiddle.jpg	PF	fear	no	middle	yes	1	161	m	m	93	3	90
Exp V1 Meye Znoeye	10	19	female	Finished stimuli\nrR\Fear\nrr_fear_Face02_eyes.jpg	nr	fear	yes	nm	yes	1	220	m	m	93	3	90
Exp V1 Meye Znoeye	10	19	female	Finished stimuli\PF\Neutral\pf_neutral_Face03_noeyestop.jpg	PF	neutral	no	top	no	0	285	z	m	94	4	90
Exp V1 Meye Znoeye	10	19	female	Finished stimuli\MO\Neutral\mo_neutral_Face01_eyesbottom.jpg	MO	neutral	no	bottom	yes	0	331	m	z	94	4	90
Exp V1 Meye Znoeye	10	19	female	Finished stimuli\MO\Fear\mo_fear_Face01_eyes.jpg	MO	fear	yes	nm	yes	1	289	m	m	94	4	90
Exp V1 Meye Znoeye	10	19	female	Finished stimuli\MO\Fear\mo_fear_Face01_noeyesmiddle.jpg	MO	fear	no	middle	no	0	327	z	m	93	3	90
Exp V1 Meye Znoeye	10	19	female	Finished stimuli\JJ\Fear\jj_fear_Face04_noeyesbottom.jpg	JJ	fear	no	bottom	no	1	324	z	z	93	3	90
Exp V1 Meye Znoeye	10	19	female	Finished stimuli\MF\Fear\mf_fear_Face05_noeyestop.jpg	MF	fear	no	top	no	1	322	z	z	93	3	90
Exp V1 Meye Znoeye	10	19	female	Finished stimuli\SW\Fear\sw_fear_Face06_noeyesmiddle.jpg	SW	fear	no	middle	no	0	376	z	m	93	3	90
Exp V1 Meye Znoeye	10	19	female	Finished stimuli\nrR\Neutral\nrr_neutral_Face02_eyesbottom.jpg	nr	neutral	no	bottom	yes	1	249	m	m	93	3	90
Exp V1 Meye Znoeye	10	19	female	Finished stimuli\WF\Neutral\wf_neutral_Face10_noeyesmiddle.jpg	WF	neutral	no	middle	no	1	391	z	z	94	4	90
Exp V1 Meye Znoeye	10	19	female	Finished stimuli\MO\Fear\mo_fear_Face01_eyestop.jpg	MO	fear	no	top	yes	1	250	m	m	93	3	90
Exp V1 Meye Znoeye	10	19	female	Finished stimuli\MO\Neutral\mo_neutral_Face01_eyes.jpg	MO	neutral	yes	nm	yes	1	287	m	m	93	3	90
Exp V1 Meye Znoeye	10	19	female	Finished stimuli\WF\Fear\wf_fear_Face10_eyesmiddle.jpg	WF	fear	no	middle	yes	1	149	m	m	93	3	90
Exp V1 Meye Znoeye	10	19	female	Finished stimuli\WF\Neutral\wf_neutral_Face10_noeyes.jpg	WF	neutral	yes	nm	no	0	416	z	m	93	3	90
Exp V1 Meye Znoeye	10	19	female	Finished stimuli\PE\Fear\pe_fear_Face08_eyestop.jpg	PE	fear	no	top	yes	1	289	m	m	94	4	90
Exp V1 Meye Znoeye	10	19	female	Finished stimuli\JJ\Neutral\jj_neutral_Face04_eyestop.jpg	JJ	neutral	no	top	yes	1	247	m	m	94	4	90
Exp V1 Meye Znoeye	10	19	female	Finished stimuli\WF\Neutral\wf_neutral_Face10_noeyesbottom.jpg	WF	neutral	no	bottom	no	1	229	z	z	93	3	90
Exp V1 Meye Znoeye	10	19	female	Finished stimuli\JJ\Neutral\jj_neutral_Face04_noeyes.jpg	JJ	neutral	yes	nm	no	1	408	z	z	94	4	90
Exp V1 Meye Znoeye	10	19	female	Finished stimuli\nrR\Neutral\nrr_neutral_Face02_eyes.jpg	nr	neutral	yes	nm	yes	1	238	m	m	94	4	90
Exp V1 Meye Znoeye	10	19	female	Finished stimuli\SW\Neutral\sw_neutral_Face06_eyestop.jpg	SW	neutral	no	top	yes	1	313	m	m	93	3	90
Exp V1 Meye Znoeye	10	19	female	Finished stimuli\nrR\Fear\nrr_fear_Face02_noeyestop.jpg	nr	fear	no	top	no	1	428	z	z	93	3	90
Exp V1 Meye Znoeye	10	19	female	Finished stimuli\MO\Neutral\mo_neutral_Face01_eyestop.jpg	MO	neutral	no	top	yes	1	223	m	m	93	3	90
Exp V1 Meye Znoeye	10	19	female	Finished stimuli\WF\Fear\wf_fear_Face10_noeyesbottom.jpg	WF	fear	no	bottom	no	1	424	z	z	93	3	90
Exp V1 Meye Znoeye	10	19	female	Finished stimuli\MF\Neutral\mf_neutral_Face05_eyes.jpg	MF	neutral	yes	nm	yes	1	329	m	m	94	4	90
Exp V1 Meye Znoeye	10	19	female	Finished stimuli\nrR\Neutral\nrr_neutral_Face02_eyesmiddle.jpg	nr	neutral	no	middle	yes	1	295	m	m	93	3	90
Exp V1 Meye Znoeye	10	19	female	Finished stimuli\PE\Neutral\pe_neutral_Face08_noeyestop.jpg	PE	neutral	no	top	no	0	180	z	m	93	3	90
Exp V1 Meye Znoeye	10	19	female	Finished stimuli\PE\Fear\pe_fear_Face08_eyesmiddle.jpg	PE	fear	no	middle	yes	1	197	m	m	93	3	90
Exp V1 Meye Znoeye	10	19	female	Finished stimuli\WF\Fear\wf_fear_Face10_eyesbottom.jpg	WF	fear	no	bottom	yes	1	176	m	m	93	3	90
Exp V1 Meye Znoeye	10	19	female	Finished stimuli\PF\Neutral\pf_neutral_Face03_noeyes.jpg	PF	neutral	yes	nm	no	0	817	z	m	94	4	90
Exp V1 Meye Znoeye	10	19	female	Finished stimuli\SW\Fear\sw_fear_Face06_noeyes.jpg	SW	fear	yes	nm	no	0	818	z	m	93	3	90
Exp V1 Meye Znoeye	10	19	female	Finished stimuli\PE\Neutral\pe_neutral_Face08_noeyesbottom.jpg	PE	neutral	no	bottom	no	1	425	z	z	93	3	90
Exp V1 Meye Znoeye	10	19	female	Finished stimuli\nrR\Neutral\nrr_neutral_Face02_noeyesbottom.jpg	nr	neutral	no	bottom	no	1	322	z	z	93	3	90
Exp V1 Meye Znoeye	10	19	female	Finished stimuli\JJ\Neutral\jj_neutral_Face04_eyesmiddle.jpg	JJ	neutral	no	middle	yes	0	176	m	z	93	3	90
Exp V1 Meye Znoeye	10	19	female	Finished stimuli\SW\Neutral\sw_neutral_Face06_eyesbottom.jpg	SW	neutral	no	bottom	yes	0	584	m	z	93	3	90
Exp V1 Meye Znoeye	10	19	female	Finished stimuli\MO\Fear\mo_fear_Face01_noeyes.jpg	MO	fear	yes	nm	no	1	377	z	z	93	3	90
Exp V1 Meye Znoeye	10	19	female	Finished stimuli\MF\Fear\mf_fear_Face05_eyesbottom.jpg	MF	fear	no	bottom	yes	1	266	m	m	94	4	90
Exp V1 Meye Znoeye	10	19	female	Finished stimuli\MF\Neutral\mf_neutral_Face05_noeyes.jpg	MF	neutral	yes	nm	no	0	402	z	m	93	3	90
Exp V1 Meye Znoeye	10	19	female	Finished stimuli\PF\Neutral\pf_neutral_Face03_noeyesmiddle.jpg	PF	neutral	no	middle	no	1	400	z	z	93	3	90
Exp V1 Meye Znoeye	10	19	female	Finished stimuli\PF\Fear\pf_fear_Face03_eyesbottom.jpg	PF	fear	no	bottom	yes	1	388	m	m	94	4	90
Exp V1 Meye Znoeye	10	19	female	Finished stimuli\SW\Neutral\sw_neutral_Face06_noeyes.jpg	SW	neutral	yes	nm	no	0	228	z	m	93	3	90
Exp V1 Meye Znoeye	10	19	female	Finished stimuli\MO\Neutral\mo_neutral_Face01_noeyesmiddle.jpg	MO	neutral	no	middle	no	1	303	z	z	93	3	90
Exp V1 Meye Znoeye	10	19	female	Finished stimuli\MO\Neutral\mo_neutral_Face01_eyesmiddle.jpg	MO	neutral	no	middle	yes	1	472	m	m	93	3	90
Exp V1 Meye Znoeye	10	19	female	Finished stimuli\JJ\Fear\jj_fear_Face04_noeyesmiddle.jpg	JJ	fear	no	middle	no	1	331	z	z	93	3	90
Exp V1 Meye Znoeye	10	19	female	Finished stimuli\nrR\Neutral\nrr_neutral_Face02_noeyes.jpg	nr	neutral	yes	nm	no	1	345	z	z	93	3	90
Exp V1 Meye Znoeye	10	19	female	Finished stimuli\WF\Fear\wf_fear_Face10_eyestop.jpg	WF	fear	no	top	yes	1	362	m	m	94	4	90
Exp V1 Meye Znoeye	10	19	female	Finished stimuli\JJ\Fear\jj_fear_Face04_eyesbottom.jpg	JJ	fear	no	bottom	yes	1	296	m	m	94	4	90
Exp V1 Meye Znoeye	10	19	female	Finished stimuli\PF\Fear\pf_fear_Face03_eyes.jpg	PF	fear	yes	nm	yes	1	520	m	m	93	3	90
Exp V1 Meye Znoeye	10	19	female	Finished stimuli\PE\Fear\pe_fear_Face08_noeyestop.jpg	PE	fear	no	top	no	1	284	z	z	94	4	90
Exp V1 Meye Znoeye	10	19	female	Finished stimuli\WF\Neutral\wf_neutral_Face10_eyesbottom.jpg	WF	neutral	no	bottom	yes	0	369	m	z	94	4	90
Exp V1 Meye Znoeye	10	19	female	Finished stimuli\JJ\Fear\jj_fear_Face04_eyestop.jpg	JJ	fear	no	top	yes	1	327	m	m	93	3	90
Exp V1 Meye Znoeye	10	19	female	Finished stimuli\SW\Neutral\sw_neutral_Face06_eyesmiddle.jpg	SW	neutral	no	middle	yes	1	588	m	m	93	3	90
Exp V1 Meye Znoeye	10	19	female	Finished stimuli\nrR\Fear\nrr_fear_Face02_eyestop.jpg	nr	fear	no	top	yes	1	360	m	m	94	4	90
Exp V1 Meye Znoeye	10	19	female	Finished stimuli\SW\Fear\sw_fear_Face06_eyesbottom.jpg	SW	fear	no	bottom	yes	0	371	m	z	93	3	90
Exp V1 Meye Znoeye	10	19	female	Finished stimuli\WF\Fear\wf_fear_Face10_noeyesmiddle.jpg	WF	fear	no	middle	no	0	297	z	m	93	3	90
Exp V1 Meye Znoeye	10	19	female	Finished stimuli\MO\Neutral\mo_neutral_Face01_noeyes.jpg	MO	neutral	yes	nm	no	0	170	z	m	94	4	90
Exp V1 Meye Znoeye	10	19	female	Finished stimuli\JJ\Fear\jj_fear_Face04_eyesmiddle.jpg	JJ	fear	no	middle	yes	1	248	m	m	93	3	90
Exp V1 Meye Znoeye	10	19	female	Finished stimuli\MO\Fear\mo_fear_Face01_eyesbottom.jpg	MO	fear	no	bottom	yes	1	165	m	m	93	3	90
Exp V1 Meye Znoeye	10	19	female	Finished stimuli\PF\Neutral\pf_neutral_Face03_noeyesbottom.jpg	PF	neutral	no	bottom	no	1	307	z	z	93	3	90
Exp V1 Meye Znoeye	10	19	female	Finished stimuli\WF\Neutral\wf_neutral_Face10_noeyestop.jpg	WF	neutral	no	top	no	1	172	z	z	94	4	90
Exp V1 Meye Znoeye	10	19	female	Finished stimuli\JJ\Fear\jj_fear_Face04_eyes.jpg	JJ	fear	yes	nm	yes	1	282	m	m	94	4	90
Exp V1 Meye Znoeye	10	19	female	Finished stimuli\JJ\Fear\jj_fear_Face04_noeyestop.jpg	JJ	fear	no	top	no	0	488	z	m	93	3	90
Exp V1 Meye Znoeye	10	19	female	Finished stimuli\nrR\Fear\nrr_fear_Face02_noeyesmiddle.jpg	nr	fear	no	middle	no	1	294	z	z	93	3	90
Exp V1 Meye Znoeye	10	19	female	Finished stimuli\PF\Neutral\pf_neutral_Face03_eyestop.jpg	PF	neutral	no	top	yes	1	436	m	m	93	3	90
Exp V1 Meye Znoeye	10	19	female	Finished stimuli\JJ\Neutral\jj_neutral_Face04_noeyesmiddle.jpg	JJ	neutral	no	middle	no	1	255	z	z	94	4	90
Exp V1 Meye Znoeye	10	19	female	Finished stimuli\MF\Neutral\mf_neutral_Face05_eyesbottom.jpg	MF	neutral	no	bottom	yes	1	349	m	m	94	4	90
Exp V1 Meye Znoeye	10	19	female	Finished stimuli\PE\Fear\pe_fear_Face08_noeyesmiddle.jpg	PE	fear	no	middle	no	1	440	z	z	93	3	90
Exp V1 Meye Znoeye	10	19	female	Finished stimuli\nrR\Neutral\nrr_neutral_Face02_eyestop.jpg	nr	neutral	no	top	yes	1	195	m	m	93	3	90
Exp V1 Meye Znoeye	10	19	female	Finished stimuli\PF\Neutral\pf_neutral_Face03_eyesbottom.jpg	PF	neutral	no	bottom	yes	0	318	m	z	93	3	90
Exp V1 Meye Znoeye	10	19	female	Finished stimuli\PE\Fear\pe_fear_Face08_noeyesbottom.jpg	PE	fear	no	bottom	no	0	457	z	m	94	4	90
Exp V1 Meye Znoeye	10	19	female	Finished stimuli\SW\Fear\sw_fear_Face06_eyestop.jpg	SW	fear	no	top	yes	0	537	m	z	93	3	90
Exp V1 Meye Znoeye	10	19	female	Finished stimuli\nrR\Neutral\nrr_neutral_Face02_noeyesmiddle.jpg	nr	neutral	no	middle	no	1	482	z	z	93	3	90
Exp V1 Meye Znoeye	10	19	female	Finished stimuli\nrR\Fear\nrr_fear_Face02_eyesbottom.jpg	nr	fear	no	bottom	yes	1	288	m	m	93	3	90
Exp V1 Meye Znoeye	10	19	female	Finished stimuli\PF\Fear\pf_fear_Face03_noeyesmiddle.jpg	PF	fear	no	middle	no	1	374	z	z	93	3	90
Exp V1 Meye Znoeye	10	19	female	Finished stimuli\JJ\Fear\jj_fear_Face04_noeyes.jpg	JJ	fear	yes	nm	no	1	276	z	z	93	3	90
Exp V1 Meye Znoeye	10	19	female	Finished stimuli\SW\Fear\sw_fear_Face06_eyes.jpg	SW	fear	yes	nm	yes	1	295	m	m	93	3	90
Exp V1 Meye Znoeye	10	19	female	Finished stimuli\WF\Fear\wf_fear_Face10_noeyestop.jpg	WF	fear	no	top	no	1	296	z	z	94	4	90
Exp V1 Meye Znoeye	10	19	female	Finished stimuli\PF\Fear\pf_fear_Face03_noeyes.jpg	PF	fear	yes	nm	no	0	304	z	m	93	3	90
Exp V1 Meye Znoeye	10	19	female	Finished stimuli\JJ\Neutral\jj_neutral_Face04_eyes.jpg	JJ	neutral	yes	nm	yes	1	281	m	m	93	3	90
Exp V1 Meye Znoeye	10	19	female	Finished stimuli\SW\Neutral\sw_neutral_Face06_noeyesmiddle.jpg	SW	neutral	no	middle	no	1	260	z	z	93	3	90
Exp V1 Meye Znoeye	10	19	female	Finished stimuli\PF\Neutral\pf_neutral_Face03_eyesmiddle.jpg	PF	neutral	no	middle	yes	1	717	m	m	94	4	90
Exp V1 Meye Znoeye	10	19	female	Finished stimuli\JJ\Neutral\jj_neutral_Face04_noeyesbottom.jpg	JJ	neutral	no	bottom	no	1	336	z	z	93	3	90
Exp V1 Meye Znoeye	10	19	female	Finished stimuli\WF\Neutral\wf_neutral_Face10_eyesmiddle.jpg	WF	neutral	no	middle	yes	1	265	m	m	94	4	90
Exp V1 Meye Znoeye	10	19	female	Finished stimuli\PE\Neutral\pe_neutral_Face08_eyesbottom.jpg	PE	neutral	no	bottom	yes	1	369	m	m	93	3	90
Exp V1 Meye Znoeye	10	19	female	Finished stimuli\SW\Fear\sw_fear_Face06_noeyesbottom.jpg	SW	fear	no	bottom	no	0	199	z	m	93	3	90
Exp V1 Meye Znoeye	10	19	female	Finished stimuli\JJ\Neutral\jj_neutral_Face04_noeyestop.jpg	JJ	neutral	no	top	no	0	386	z	m	93	3	90
Exp V1 Meye Znoeye	10	19	female	Finished stimuli\PE\Neutral\pe_neutral_Face08_eyestop.jpg	PE	neutral	no	top	yes	1	307	m	m	93	3	90
Exp V1 Meye Znoeye	10	19	female	Finished stimuli\PF\Fear\pf_fear_Face03_eyestop.jpg	PF	fear	no	top	yes	1	252	m	m	94	4	90
Exp V1 Meye Znoeye	10	19	female	Finished stimuli\SW\Fear\sw_fear_Face06_eyesmiddle.jpg	SW	fear	no	middle	yes	1	64	m	m	93	3	90
Exp V1 Meye Znoeye	10	19	female	Finished stimuli\PE\Neutral\pe_neutral_Face08_noeyes.jpg	PE	neutral	yes	nm	no	0	65	z	m	93	3	90
Exp V1 Meye Znoeye	10	19	female	Finished stimuli\PE\Neutral\pe_neutral_Face08_eyesmiddle.jpg	PE	neutral	no	middle	yes	0	249	m	z	93	3	90
Exp V1 Meye Znoeye	10	19	female	Finished stimuli\PE\Fear\pe_fear_Face08_noeyes.jpg	PE	fear	yes	nm	no	1	519	z	z	93	3	90
Exp V1 Meye Znoeye	10	19	female	Finished stimuli\PE\Fear\pe_fear_Face08_eyes.jpg	PE	fear	yes	nm	yes	1	283	m	m	94	4	90
Exp V1 Meye Znoeye	10	19	female	Finished stimuli\nrR\Fear\nrr_fear_Face02_noeyesbottom.jpg	nr	fear	no	bottom	no	1	409	z	z	93	3	90
Exp V1 Meye Znoeye	10	19	female	Finished stimuli\SW\Neutral\sw_neutral_Face06_eyes.jpg	SW	neutral	yes	nm	yes	1	263	m	m	93	3	90
Exp V1 Meye Znoeye	10	19	female	Finished stimuli\MF\Neutral\mf_neutral_Face05_noeyesbottom.jpg	MF	neutral	no	bottom	no	1	439	z	z	93	3	90
Exp V1 Meye Znoeye	10	19	female	Finished stimuli\MO\Fear\mo_fear_Face01_noeyestop.jpg	MO	fear	no	top	no	0	282	z	m	93	3	90
Exp V1 Meye Znoeye	10	19	female	Finished stimuli\WF\Neutral\wf_neutral_Face10_eyestop.jpg	WF	neutral	no	top	yes	1	160	m	m	93	3	90
Exp V1 Meye Znoeye	10	19	female	Finished stimuli\nrR\Fear\nrr_fear_Face02_eyesmiddle.jpg	nr	fear	no	middle	yes	1	555	m	m	93	3	90
Exp V1 Meye Znoeye	10	19	female	Finished stimuli\nrR\Fear\nrr_fear_Face02_noeyes.jpg	nr	fear	yes	nm	no	1	207	z	z	94	4	90
Exp V1 Meye Znoeye	10	19	female	Finished stimuli\MO\Fear\mo_fear_Face01_eyesmiddle.jpg	MO	fear	no	middle	yes	1	165	m	m	94	4	90
Exp V1 Meye Znoeye	10	19	female	Finished stimuli\MF\Neutral\mf_neutral_Face05_eyesmiddle.jpg	MF	neutral	no	middle	yes	1	75	m	m	93	3	90
Exp V1 Meye Znoeye	10	19	female	Finished stimuli\JJ\Neutral\jj_neutral_Face04_eyestop.jpg	JJ	neutral	no	top	yes	1	164	m	m	93	3	90
Exp V1 Meye Znoeye	10	19	female	Finished stimuli\JJ\Neutral\jj_neutral_Face04_noeyes.jpg	JJ	neutral	yes	nm	no	0	2154	z	m	94	4	90
Exp V1 Meye Znoeye	10	19	female	Finished stimuli\MO\Fear\mo_fear_Face01_eyes.jpg	MO	fear	yes	nm	yes	1	269	m	m	93	3	90
Exp V1 Meye Znoeye	10	19	female	Finished stimuli\JJ\Fear\jj_fear_Face04_noeyestop.jpg	JJ	fear	no	top	no	0	168	z	m	93	3	90
Exp V1 Meye Znoeye	10	19	female	Finished stimuli\PF\Neutral\pf_neutral_Face03_eyestop.jpg	PF	neutral	no	top	yes	1	222	m	m	93	3	90
Exp V1 Meye Znoeye	10	19	female	Finished stimuli\SW\Neutral\sw_neutral_Face06_eyesbottom.jpg	SW	neutral	no	bottom	yes	1	239	m	m	93	3	90
Exp V1 Meye Znoeye	10	19	female	Finished stimuli\WF\Neutral\wf_neutral_Face10_noeyestop.jpg	WF	neutral	no	top	no	1	826	z	z	94	4	90
Exp V1 Meye Znoeye	10	19	female	Finished stimuli\PE\Neutral\pe_neutral_Face08_eyes.jpg	PE	neutral	yes	nm	yes	1	395	m	m	94	4	90
Exp V1 Meye Znoeye	10	19	female	Finished stimuli\JJ\Neutral\jj_neutral_Face04_noeyesmiddle.jpg	JJ	neutral	no	middle	no	1	254	z	z	93	3	90
Exp V1 Meye Znoeye	10	19	female	Finished stimuli\PE\Neutral\pe_neutral_Face08_noeyesmiddle.jpg	PE	neutral	no	middle	no	1	156	z	z	94	4	90
Exp V1 Meye Znoeye	10	19	female	Finished stimuli\PF\Neutral\pf_neutral_Face03_noeyes.jpg	PF	neutral	yes	nm	no	0	127	z	m	93	3	90
Exp V1 Meye Znoeye	10	19	female	Finished stimuli\nrR\Neutral\nrr_neutral_Face02_eyestop.jpg	nr	neutral	no	top	yes	0	133	m	z	94	4	90
Exp V1 Meye Znoeye	10	19	female	Finished stimuli\WF\Fear\wf_fear_Face10_eyes.jpg	WF	fear	yes	nm	yes	1	275	m	m	94	4	90
Exp V1 Meye Znoeye	10	19	female	Finished stimuli\PE\Neutral\pe_neutral_Face08_noeyes.jpg	PE	neutral	yes	nm	no	0	62	z	m	94	4	90
Exp V1 Meye Znoeye	10	19	female	Finished stimuli\PE\Fear\pe_fear_Face08_noeyestop.jpg	PE	fear	no	top	no	1	222	z	z	93	3	90
Exp V1 Meye Znoeye	10	19	female	Finished stimuli\PF\Neutral\pf_neutral_Face03_eyesbottom.jpg	PF	neutral	no	bottom	yes	1	167	m	m	94	4	90
Exp V1 Meye Znoeye	10	19	female	Finished stimuli\MF\Fear\mf_fear_Face05_noeyes.jpg	MF	fear	yes	nm	no	1	421	z	z	94	4	90
Exp V1 Meye Znoeye	10	19	female	Finished stimuli\WF\Fear\wf_fear_Face10_noeyestop.jpg	WF	fear	no	top	no	1	141	z	z	93	3	90
Exp V1 Meye Znoeye	10	19	female	Finished stimuli\WF\Fear\wf_fear_Face10_noeyesbottom.jpg	WF	fear	no	bottom	no	1	182	z	z	94	4	90
Exp V1 Meye Znoeye	10	19	female	Finished stimuli\PE\Neutral\pe_neutral_Face08_eyestop.jpg	PE	neutral	no	top	yes	0	166	m	z	93	3	90
Exp V1 Meye Znoeye	10	19	female	Finished stimuli\WF\Fear\wf_fear_Face10_noeyesmiddle.jpg	WF	fear	no	middle	no	1	140	z	z	93	3	90
Exp V1 Meye Znoeye	10	19	female	Finished stimuli\WF\Neutral\wf_neutral_Face10_noeyesmiddle.jpg	WF	neutral	no	middle	no	1	197	z	z	94	4	90
Exp V1 Meye Znoeye	10	19	female	Finished stimuli\WF\Neutral\wf_neutral_Face10_eyesmiddle.jpg	WF	neutral	no	middle	yes	0	88	m	z	93	3	90
Exp V1 Meye Znoeye	10	19	female	Finished stimuli\nrR\Neutral\nrr_neutral_Face02_noeyes.jpg	nr	neutral	yes	nm	no	0	157	z	m	94	4	90
Exp V1 Meye Znoeye	10	19	female	Finished stimuli\PF\Neutral\pf_neutral_Face03_eyes.jpg	PF	neutral	yes	nm	yes	1	208	m	m	93	3	90
Exp V1 Meye Znoeye	10	19	female	Finished stimuli\MO\Fear\mo_fear_Face01_noeyesbottom.jpg	MO	fear	no	bottom	no	1	318	z	z	94	4	90
Exp V1 Meye Znoeye	10	19	female	Finished stimuli\JJ\Fear\jj_fear_Face04_noeyesmiddle.jpg	JJ	fear	no	middle	no	1	201	z	z	93	3	90
Exp V1 Meye Znoeye	10	19	female	Finished stimuli\nrR\Neutral\nrr_neutral_Face02_noeyesmiddle.jpg	nr	neutral	no	middle	no	1	116	z	z	93	3	90
Exp V1 Meye Znoeye	10	19	female	Finished stimuli\MF\Fear\mf_fear_Face05_eyesbottom.jpg	MF	fear	no	bottom	yes	1	479	m	m	93	3	90
Exp V1 Meye Znoeye	10	19	female	Finished stimuli\MO\Neutral\mo_neutral_Face01_noeyes.jpg	MO	neutral	yes	nm	no	0	83	z	m	94	4	90
Exp V1 Meye Znoeye	10	19	female	Finished stimuli\nrR\Neutral\nrr_neutral_Face02_noeyestop.jpg	nr	neutral	no	top	no	0	32	z	m	93	3	90
Exp V1 Meye Znoeye	10	19	female	Finished stimuli\SW\Fear\sw_fear_Face06_eyes.jpg	SW	fear	yes	nm	yes	1	260	m	m	94	4	90
Exp V1 Meye Znoeye	10	19	female	Finished stimuli\MO\Fear\mo_fear_Face01_noeyes.jpg	MO	fear	yes	nm	no	0	428	z	m	93	3	90
Exp V1 Meye Znoeye	10	19	female	Finished stimuli\SW\Neutral\sw_neutral_Face06_noeyesbottom.jpg	SW	neutral	no	bottom	no	1	327	z	z	93	3	90
Exp V1 Meye Znoeye	10	19	female	Finished stimuli\SW\Fear\sw_fear_Face06_eyesbottom.jpg	SW	fear	no	bottom	yes	1	261	m	m	93	3	90
Exp V1 Meye Znoeye	10	19	female	Finished stimuli\WF\Fear\wf_fear_Face10_noeyes.jpg	WF	fear	yes	nm	no	0	326	z	m	93	3	90
Exp V1 Meye Znoeye	10	19	female	Finished stimuli\WF\Fear\wf_fear_Face10_eyesbottom.jpg	WF	fear	no	bottom	yes	1	308	m	m	93	3	90
Exp V1 Meye Znoeye	10	19	female	Finished stimuli\MF\Fear\mf_fear_Face05_eyes.jpg	MF	fear	yes	nm	yes	1	132	m	m	93	3	90
Exp V1 Meye Znoeye	10	19	female	Finished stimuli\JJ\Fear\jj_fear_Face04_noeyes.jpg	JJ	fear	yes	nm	no	0	762	z	m	93	3	90
Exp V1 Meye Znoeye	10	19	female	Finished stimuli\MF\Neutral\mf_neutral_Face05_noeyesbottom.jpg	MF	neutral	no	bottom	no	0	288	z	m	93	3	90
Exp V1 Meye Znoeye	10	19	female	Finished stimuli\JJ\Neutral\jj_neutral_Face04_noeyestop.jpg	JJ	neutral	no	top	no	0	278	z	m	93	3	90
Exp V1 Meye Znoeye	10	19	female	Finished stimuli\JJ\Fear\jj_fear_Face04_noeyesbottom.jpg	JJ	fear	no	bottom	no	1	234	z	z	93	3	90
Exp V1 Meye Znoeye	10	19	female	Finished stimuli\MO\Neutral\mo_neutral_Face01_eyesbottom.jpg	MO	neutral	no	bottom	yes	1	373	m	m	94	4	90
Exp V1 Meye Znoeye	10	19	female	Finished stimuli\MF\Neutral\mf_neutral_Face05_eyestop.jpg	MF	neutral	no	top	yes	0	314	m	z	94	4	90
Exp V1 Meye Znoeye	10	19	female	Finished stimuli\SW\Fear\sw_fear_Face06_noeyesbottom.jpg	SW	fear	no	bottom	no	0	165	z	m	93	3	90
Exp V1 Meye Znoeye	10	19	female	Finished stimuli\MO\Fear\mo_fear_Face01_noeyestop.jpg	MO	fear	no	top	no	0	619	z	m	94	4	90
Exp V1 Meye Znoeye	10	19	female	Finished stimuli\PF\Fear\pf_fear_Face03_noeyesmiddle.jpg	PF	fear	no	middle	no	1	340	z	z	93	3	90
Exp V1 Meye Znoeye	10	19	female	Finished stimuli\SW\Fear\sw_fear_Face06_noeyes.jpg	SW	fear	yes	nm	no	1	124	z	z	93	3	90
Exp V1 Meye Znoeye	10	19	female	Finished stimuli\SW\Fear\sw_fear_Face06_eyestop.jpg	SW	fear	no	top	yes	1	266	m	m	93	3	90
Exp V1 Meye Znoeye	10	19	female	Finished stimuli\MF\Fear\mf_fear_Face05_eyesmiddle.jpg	MF	fear	no	middle	yes	1	99	m	m	93	3	90
Exp V1 Meye Znoeye	10	19	female	Finished stimuli\SW\Neutral\sw_neutral_Face06_noeyes.jpg	SW	neutral	yes	nm	no	0	747	z	m	93	3	90
Exp V1 Meye Znoeye	10	19	female	Finished stimuli\MO\Neutral\mo_neutral_Face01_noeyestop.jpg	MO	neutral	no	top	no	0	84	z	m	94	4	90
Exp V1 Meye Znoeye	10	19	female	Finished stimuli\PF\Fear\pf_fear_Face03_eyesmiddle.jpg	PF	fear	no	middle	yes	1	234	m	m	94	4	90
Exp V1 Meye Znoeye	10	19	female	Finished stimuli\PE\Fear\pe_fear_Face08_noeyesbottom.jpg	PE	fear	no	bottom	no	1	301	z	z	94	4	90
Exp V1 Meye Znoeye	10	19	female	Finished stimuli\nrR\Fear\nrr_fear_Face02_noeyesbottom.jpg	nr	fear	no	bottom	no	1	221	z	z	93	3	90
Exp V1 Meye Znoeye	10	19	female	Finished stimuli\MF\Neutral\mf_neutral_Face05_eyesbottom.jpg	MF	neutral	no	bottom	yes	0	142	m	z	93	3	90
Exp V1 Meye Znoeye	10	19	female	Finished stimuli\MO\Neutral\mo_neutral_Face01_noeyesmiddle.jpg	MO	neutral	no	middle	no	1	430	z	z	93	3	90
Exp V1 Meye Znoeye	10	19	female	Finished stimuli\nrR\Fear\nrr_fear_Face02_noeyestop.jpg	nr	fear	no	top	no	1	554	z	z	94	4	90
Exp V1 Meye Znoeye	10	19	female	Finished stimuli\WF\Fear\wf_fear_Face10_eyestop.jpg	WF	fear	no	top	yes	1	357	m	m	93	3	90
Exp V1 Meye Znoeye	10	19	female	Finished stimuli\MO\Neutral\mo_neutral_Face01_noeyesbottom.jpg	MO	neutral	no	bottom	no	1	320	z	z	93	3	90
Exp V1 Meye Znoeye	10	19	female	Finished stimuli\nrR\Neutral\nrr_neutral_Face02_eyes.jpg	nr	neutral	yes	nm	yes	1	276	m	m	94	4	90
Exp V1 Meye Znoeye	10	19	female	Finished stimuli\PE\Fear\pe_fear_Face08_eyesmiddle.jpg	PE	fear	no	middle	yes	1	231	m	m	94	4	90
Exp V1 Meye Znoeye	10	19	female	Finished stimuli\SW\Neutral\sw_neutral_Face06_noeyestop.jpg	SW	neutral	no	top	no	0	633	z	m	93	3	90
Exp V1 Meye Znoeye	10	19	female	Finished stimuli\PE\Fear\pe_fear_Face08_eyes.jpg	PE	fear	yes	nm	yes	1	252	m	m	93	3	90
Exp V1 Meye Znoeye	10	19	female	Finished stimuli\nrR\Fear\nrr_fear_Face02_eyestop.jpg	nr	fear	no	top	yes	1	162	m	m	93	3	90
Exp V1 Meye Znoeye	10	19	female	Finished stimuli\PE\Fear\pe_fear_Face08_noeyes.jpg	PE	fear	yes	nm	no	0	152	z	m	93	3	90
Exp V1 Meye Znoeye	10	19	female	Finished stimuli\JJ\Neutral\jj_neutral_Face04_noeyesbottom.jpg	JJ	neutral	no	bottom	no	1	1267	z	z	93	3	90
Exp V1 Meye Znoeye	10	19	female	Finished stimuli\PE\Neutral\pe_neutral_Face08_eyesbottom.jpg	PE	neutral	no	bottom	yes	0	876	m	z	93	3	90
Exp V1 Meye Znoeye	10	19	female	Finished stimuli\nrR\Neutral\nrr_neutral_Face02_eyesmiddle.jpg	nr	neutral	no	middle	yes	1	80	m	m	93	3	90
Exp V1 Meye Znoeye	10	19	female	Finished stimuli\WF\Neutral\wf_neutral_Face10_eyesbottom.jpg	WF	neutral	no	bottom	yes	0	347	m	z	93	3	90
Exp V1 Meye Znoeye	10	19	female	Finished stimuli\MF\Neutral\mf_neutral_Face05_eyes.jpg	MF	neutral	yes	nm	yes	1	204	m	m	94	4	90
Exp V1 Meye Znoeye	10	19	female	Finished stimuli\PF\Fear\pf_fear_Face03_eyes.jpg	PF	fear	yes	nm	yes	1	154	m	m	93	3	90
Exp V1 Meye Znoeye	10	19	female	Finished stimuli\MF\Fear\mf_fear_Face05_noeyesbottom.jpg	MF	fear	no	bottom	no	0	221	z	m	94	4	90
Exp V1 Meye Znoeye	10	19	female	Finished stimuli\PF\Neutral\pf_neutral_Face03_noeyesbottom.jpg	PF	neutral	no	bottom	no	1	229	z	z	93	3	90
Exp V1 Meye Znoeye	10	19	female	Finished stimuli\SW\Neutral\sw_neutral_Face06_eyesmiddle.jpg	SW	neutral	no	middle	yes	1	272	m	m	93	3	90
Exp V1 Meye Znoeye	10	19	female	Finished stimuli\nrR\Fear\nrr_fear_Face02_noeyes.jpg	nr	fear	yes	nm	no	1	340	z	z	94	4	90
Exp V1 Meye Znoeye	10	19	female	Finished stimuli\MO\Fear\mo_fear_Face01_eyesbottom.jpg	MO	fear	no	bottom	yes	1	260	m	m	93	3	90
Exp V1 Meye Znoeye	10	19	female	Finished stimuli\MF\Neutral\mf_neutral_Face05_eyesmiddle.jpg	MF	neutral	no	middle	yes	1	397	m	m	94	4	90
Exp V1 Meye Znoeye	10	19	female	Finished stimuli\PF\Fear\pf_fear_Face03_eyestop.jpg	PF	fear	no	top	yes	1	152	m	m	93	3	90
Exp V1 Meye Znoeye	10	19	female	Finished stimuli\WF\Neutral\wf_neutral_Face10_noeyes.jpg	WF	neutral	yes	nm	no	0	147	z	m	93	3	90
Exp V1 Meye Znoeye	10	19	female	Finished stimuli\nrR\Fear\nrr_fear_Face02_noeyesmiddle.jpg	nr	fear	no	middle	no	0	28	z	m	94	4	90
Exp V1 Meye Znoeye	10	19	female	Finished stimuli\PF\Fear\pf_fear_Face03_noeyestop.jpg	PF	fear	no	top	no	1	347	z	z	93	3	90
Exp V1 Meye Znoeye	10	19	female	Finished stimuli\JJ\Neutral\jj_neutral_Face04_eyes.jpg	JJ	neutral	yes	nm	yes	1	188	m	m	93	3	90
Exp V1 Meye Znoeye	10	19	female	Finished stimuli\WF\Neutral\wf_neutral_Face10_eyestop.jpg	WF	neutral	no	top	yes	1	324	m	m	93	3	90
Exp V1 Meye Znoeye	10	19	female	Finished stimuli\JJ\Fear\jj_fear_Face04_eyestop.jpg	JJ	fear	no	top	yes	1	138	m	m	93	3	90
Exp V1 Meye Znoeye	10	19	female	Finished stimuli\PF\Fear\pf_fear_Face03_noeyes.jpg	PF	fear	yes	nm	no	0	339	z	m	94	4	90
Exp V1 Meye Znoeye	10	19	female	Finished stimuli\PE\Fear\pe_fear_Face08_noeyesmiddle.jpg	PE	fear	no	middle	no	1	203	z	z	93	3	90
Exp V1 Meye Znoeye	10	19	female	Finished stimuli\MF\Neutral\mf_neutral_Face05_noeyesmiddle.jpg	MF	neutral	no	middle	no	1	321	z	z	93	3	90
Exp V1 Meye Znoeye	10	19	female	Finished stimuli\MF\Fear\mf_fear_Face05_noeyestop.jpg	MF	fear	no	top	no	1	77	z	z	93	3	90
Exp V1 Meye Znoeye	10	19	female	Finished stimuli\PE\Neutral\pe_neutral_Face08_eyesmiddle.jpg	PE	neutral	no	middle	yes	1	216	m	m	94	4	90
Exp V1 Meye Znoeye	10	19	female	Finished stimuli\MF\Fear\mf_fear_Face05_noeyesmiddle.jpg	MF	fear	no	middle	no	0	136	z	m	93	3	90
Exp V1 Meye Znoeye	10	19	female	Finished stimuli\WF\Neutral\wf_neutral_Face10_noeyesbottom.jpg	WF	neutral	no	bottom	no	1	257	z	z	94	4	90
Exp V1 Meye Znoeye	10	19	female	Finished stimuli\nrR\Neutral\nrr_neutral_Face02_noeyesbottom.jpg	nr	neutral	no	bottom	no	1	153	z	z	93	3	90
Exp V1 Meye Znoeye	10	19	female	Finished stimuli\nrR\Fear\nrr_fear_Face02_eyesmiddle.jpg	nr	fear	no	middle	yes	1	204	m	m	93	3	90
Exp V1 Meye Znoeye	10	19	female	Finished stimuli\WF\Fear\wf_fear_Face10_eyesmiddle.jpg	WF	fear	no	middle	yes	1	122	m	m	93	3	90
Exp V1 Meye Znoeye	10	19	female	Finished stimuli\MO\Neutral\mo_neutral_Face01_eyestop.jpg	MO	neutral	no	top	yes	1	136	m	m	93	3	90
Exp V1 Meye Znoeye	10	19	female	Finished stimuli\JJ\Fear\jj_fear_Face04_eyes.jpg	JJ	fear	yes	nm	yes	1	169	m	m	94	4	90
Exp V1 Meye Znoeye	10	19	female	Finished stimuli\nrR\Fear\nrr_fear_Face02_eyesbottom.jpg	nr	fear	no	bottom	yes	1	423	m	m	93	3	90
Exp V1 Meye Znoeye	10	19	female	Finished stimuli\PE\Fear\pe_fear_Face08_eyesbottom.jpg	PE	fear	no	bottom	yes	1	23	m	m	93	3	90
Exp V1 Meye Znoeye	10	19	female	Finished stimuli\SW\Fear\sw_fear_Face06_eyesmiddle.jpg	SW	fear	no	middle	yes	1	208	m	m	93	3	90
Exp V1 Meye Znoeye	10	19	female	Finished stimuli\MO\Neutral\mo_neutral_Face01_eyesmiddle.jpg	MO	neutral	no	middle	yes	1	253	m	m	93	3	90
Exp V1 Meye Znoeye	10	19	female	Finished stimuli\JJ\Fear\jj_fear_Face04_eyesmiddle.jpg	JJ	fear	no	middle	yes	1	155	m	m	93	3	90
Exp V1 Meye Znoeye	10	19	female	Finished stimuli\SW\Fear\sw_fear_Face06_noeyestop.jpg	SW	fear	no	top	no	0	173	z	m	93	3	90
Exp V1 Meye Znoeye	10	19	female	Finished stimuli\PF\Fear\pf_fear_Face03_eyesbottom.jpg	PF	fear	no	bottom	yes	1	99	m	m	93	3	90
Exp V1 Meye Znoeye	10	19	female	Finished stimuli\MF\Fear\mf_fear_Face05_eyestop.jpg	MF	fear	no	top	yes	1	188	m	m	94	4	90
Exp V1 Meye Znoeye	10	19	female	Finished stimuli\SW\Neutral\sw_neutral_Face06_eyes.jpg	SW	neutral	yes	nm	yes	1	231	m	m	93	3	90
Exp V1 Meye Znoeye	10	19	female	Finished stimuli\PE\Fear\pe_fear_Face08_eyestop.jpg	PE	fear	no	top	yes	1	170	m	m	93	3	90
Exp V1 Meye Znoeye	10	19	female	Finished stimuli\nrR\Neutral\nrr_neutral_Face02_eyesbottom.jpg	nr	neutral	no	bottom	yes	1	224	m	m	93	3	90
Exp V1 Meye Znoeye	10	19	female	Finished stimuli\JJ\Neutral\jj_neutral_Face04_eyesmiddle.jpg	JJ	neutral	no	middle	yes	1	233	m	m	94	4	90
Exp V1 Meye Znoeye	10	19	female	Finished stimuli\WF\Neutral\wf_neutral_Face10_eyes.jpg	WF	neutral	yes	nm	yes	1	220	m	m	94	4	90
Exp V1 Meye Znoeye	10	19	female	Finished stimuli\PF\Fear\pf_fear_Face03_noeyesbottom.jpg	PF	fear	no	bottom	no	0	36	z	m	93	3	90
Exp V1 Meye Znoeye	10	19	female	Finished stimuli\SW\Neutral\sw_neutral_Face06_noeyesmiddle.jpg	SW	neutral	no	middle	no	1	279	z	z	93	3	90
Exp V1 Meye Znoeye	10	19	female	Finished stimuli\PE\Neutral\pe_neutral_Face08_noeyestop.jpg	PE	neutral	no	top	no	0	107	z	m	94	4	90
Exp V1 Meye Znoeye	10	19	female	Finished stimuli\PF\Neutral\pf_neutral_Face03_eyesmiddle.jpg	PF	neutral	no	middle	yes	1	195	m	m	93	3	90
Exp V1 Meye Znoeye	10	19	female	Finished stimuli\PF\Neutral\pf_neutral_Face03_noeyesmiddle.jpg	PF	neutral	no	middle	no	1	238	z	z	93	3	90
Exp V1 Meye Znoeye	10	19	female	Finished stimuli\MO\Fear\mo_fear_Face01_eyestop.jpg	MO	fear	no	top	yes	0	170	m	z	94	4	90
Exp V1 Meye Znoeye	10	19	female	Finished stimuli\PF\Neutral\pf_neutral_Face03_noeyestop.jpg	PF	neutral	no	top	no	0	151	z	m	93	3	90
Exp V1 Meye Znoeye	10	19	female	Finished stimuli\SW\Neutral\sw_neutral_Face06_eyestop.jpg	SW	neutral	no	top	yes	1	163	m	m	94	4	90
Exp V1 Meye Znoeye	10	19	female	Finished stimuli\MF\Neutral\mf_neutral_Face05_noeyestop.jpg	MF	neutral	no	top	no	1	280	z	z	93	3	90
Exp V1 Meye Znoeye	10	19	female	Finished stimuli\PE\Neutral\pe_neutral_Face08_noeyesbottom.jpg	PE	neutral	no	bottom	no	1	700	z	z	94	4	90
Exp V1 Meye Znoeye	10	19	female	Finished stimuli\MO\Fear\mo_fear_Face01_eyesmiddle.jpg	MO	fear	no	middle	yes	1	292	m	m	93	3	90
Exp V1 Meye Znoeye	10	19	female	Finished stimuli\JJ\Fear\jj_fear_Face04_eyesbottom.jpg	JJ	fear	no	bottom	yes	1	42	m	m	93	3	90
Exp V1 Meye Znoeye	10	19	female	Finished stimuli\JJ\Neutral\jj_neutral_Face04_eyesbottom.jpg	JJ	neutral	no	bottom	yes	1	318	m	m	93	3	90
Exp V1 Meye Znoeye	10	19	female	Finished stimuli\SW\Fear\sw_fear_Face06_noeyesmiddle.jpg	SW	fear	no	middle	no	0	904	z	m	94	4	90
Exp V1 Meye Znoeye	10	19	female	Finished stimuli\nrR\Fear\nrr_fear_Face02_eyes.jpg	nr	fear	yes	nm	yes	1	289	m	m	94	4	90
Exp V1 Meye Znoeye	10	19	female	Finished stimuli\MO\Neutral\mo_neutral_Face01_eyes.jpg	MO	neutral	yes	nm	yes	0	223	m	z	93	3	90
Exp V1 Meye Znoeye	10	19	female	Finished stimuli\MF\Neutral\mf_neutral_Face05_noeyes.jpg	MF	neutral	yes	nm	no	0	207	z	m	93	3	90
Exp V1 Meye Znoeye	10	19	female	Finished stimuli\MO\Fear\mo_fear_Face01_noeyesmiddle.jpg	MO	fear	no	middle	no	0	13	z	m	93	3	90
Exp V1 Meye Znoeye	10	19	female	Finished stimuli\PE\Fear\pe_fear_Face08_noeyestop.jpg	PE	fear	no	top	no	0	536	z	m	93	3	90
Exp V1 Meye Znoeye	10	19	female	Finished stimuli\PE\Neutral\pe_neutral_Face08_eyestop.jpg	PE	neutral	no	top	yes	1	265	m	m	94	4	90
Exp V1 Meye Znoeye	10	19	female	Finished stimuli\JJ\Fear\jj_fear_Face04_eyestop.jpg	JJ	fear	no	top	yes	1	121	m	m	93	3	90
Exp V1 Meye Znoeye	10	19	female	Finished stimuli\PE\Fear\pe_fear_Face08_eyestop.jpg	PE	fear	no	top	yes	1	204	m	m	93	3	90
Exp V1 Meye Znoeye	10	19	female	Finished stimuli\PF\Fear\pf_fear_Face03_eyes.jpg	PF	fear	yes	nm	yes	1	218	m	m	93	3	90
Exp V1 Meye Znoeye	10	19	female	Finished stimuli\MO\Neutral\mo_neutral_Face01_eyestop.jpg	MO	neutral	no	top	yes	1	315	m	m	94	4	90
Exp V1 Meye Znoeye	10	19	female	Finished stimuli\SW\Fear\sw_fear_Face06_noeyes.jpg	SW	fear	yes	nm	no	1	446	z	z	93	3	90
Exp V1 Meye Znoeye	10	19	female	Finished stimuli\PE\Fear\pe_fear_Face08_eyesmiddle.jpg	PE	fear	no	middle	yes	1	220	m	m	93	3	90
Exp V1 Meye Znoeye	10	19	female	Finished stimuli\PF\Neutral\pf_neutral_Face03_noeyes.jpg	PF	neutral	yes	nm	no	0	21	z	m	93	3	90
Exp V1 Meye Znoeye	10	19	female	Finished stimuli\PF\Fear\pf_fear_Face03_eyestop.jpg	PF	fear	no	top	yes	1	197	m	m	93	3	90
Exp V1 Meye Znoeye	10	19	female	Finished stimuli\MO\Neutral\mo_neutral_Face01_noeyestop.jpg	MO	neutral	no	top	no	0	47	z	m	93	3	90
Exp V1 Meye Znoeye	10	19	female	Finished stimuli\WF\Fear\wf_fear_Face10_noeyesmiddle.jpg	WF	fear	no	middle	no	0	397	z	m	93	3	90
Exp V1 Meye Znoeye	10	19	female	Finished stimuli\JJ\Neutral\jj_neutral_Face04_noeyestop.jpg	JJ	neutral	no	top	no	1	552	z	z	93	3	90
Exp V1 Meye Znoeye	10	19	female	Finished stimuli\PE\Fear\pe_fear_Face08_eyesbottom.jpg	PE	fear	no	bottom	yes	1	172	m	m	94	4	90
Exp V1 Meye Znoeye	10	19	female	Finished stimuli\MF\Neutral\mf_neutral_Face05_noeyesmiddle.jpg	MF	neutral	no	middle	no	1	337	z	z	93	3	90
Exp V1 Meye Znoeye	10	19	female	Finished stimuli\MF\Fear\mf_fear_Face05_noeyesbottom.jpg	MF	fear	no	bottom	no	1	210	z	z	93	3	90
Exp V1 Meye Znoeye	10	19	female	Finished stimuli\WF\Fear\wf_fear_Face10_noeyesbottom.jpg	WF	fear	no	bottom	no	1	184	z	z	93	3	90
Exp V1 Meye Znoeye	10	19	female	Finished stimuli\WF\Fear\wf_fear_Face10_eyes.jpg	WF	fear	yes	nm	yes	1	232	m	m	93	3	90
Exp V1 Meye Znoeye	10	19	female	Finished stimuli\WF\Neutral\wf_neutral_Face10_eyes.jpg	WF	neutral	yes	nm	yes	1	332	m	m	94	4	90
Exp V1 Meye Znoeye	10	19	female	Finished stimuli\PE\Neutral\pe_neutral_Face08_eyes.jpg	PE	neutral	yes	nm	yes	1	290	m	m	94	4	90
Exp V1 Meye Znoeye	10	19	female	Finished stimuli\MF\Fear\mf_fear_Face05_eyestop.jpg	MF	fear	no	top	yes	1	1160	m	m	93	3	90
Exp V1 Meye Znoeye	10	19	female	Finished stimuli\WF\Neutral\wf_neutral_Face10_noeyes.jpg	WF	neutral	yes	nm	no	0	123	z	m	93	3	90
Exp V1 Meye Znoeye	10	19	female	Finished stimuli\PE\Neutral\pe_neutral_Face08_eyesbottom.jpg	PE	neutral	no	bottom	yes	1	273	m	m	93	3	90
Exp V1 Meye Znoeye	10	19	female	Finished stimuli\WF\Neutral\wf_neutral_Face10_eyesmiddle.jpg	WF	neutral	no	middle	yes	1	20	m	m	93	3	90
Exp V1 Meye Znoeye	10	19	female	Finished stimuli\PF\Neutral\pf_neutral_Face03_eyesbottom.jpg	PF	neutral	no	bottom	yes	1	357	m	m	94	4	90
Exp V1 Meye Znoeye	10	19	female	Finished stimuli\MO\Fear\mo_fear_Face01_eyesbottom.jpg	MO	fear	no	bottom	yes	1	144	m	m	93	3	90
Exp V1 Meye Znoeye	10	19	female	Finished stimuli\PF\Fear\pf_fear_Face03_noeyes.jpg	PF	fear	yes	nm	no	0	16	z	m	93	3	90
Exp V1 Meye Znoeye	10	19	female	Finished stimuli\SW\Fear\sw_fear_Face06_noeyestop.jpg	SW	fear	no	top	no	0	113	z	m	93	3	90
Exp V1 Meye Znoeye	10	19	female	Finished stimuli\JJ\Fear\jj_fear_Face04_eyesmiddle.jpg	JJ	fear	no	middle	yes	1	164	m	m	93	3	90
Exp V1 Meye Znoeye	10	19	female	Finished stimuli\JJ\Neutral\jj_neutral_Face04_noeyesbottom.jpg	JJ	neutral	no	bottom	no	1	210	z	z	93	3	90
Exp V1 Meye Znoeye	10	19	female	Finished stimuli\nrR\Fear\nrr_fear_Face02_eyestop.jpg	nr	fear	no	top	yes	1	247	m	m	94	4	90
Exp V1 Meye Znoeye	10	19	female	Finished stimuli\nrR\Neutral\nrr_neutral_Face02_eyestop.jpg	nr	neutral	no	top	yes	1	205	m	m	94	4	90
Exp V1 Meye Znoeye	10	19	female	Finished stimuli\MF\Fear\mf_fear_Face05_eyesmiddle.jpg	MF	fear	no	middle	yes	1	19	m	m	93	3	90
Exp V1 Meye Znoeye	10	19	female	Finished stimuli\JJ\Fear\jj_fear_Face04_eyesbottom.jpg	JJ	fear	no	bottom	yes	1	51	m	m	93	3	90
Exp V1 Meye Znoeye	10	19	female	Finished stimuli\MF\Fear\mf_fear_Face05_noeyestop.jpg	MF	fear	no	top	no	0	17	z	m	94	4	90
Exp V1 Meye Znoeye	10	19	female	Finished stimuli\PF\Neutral\pf_neutral_Face03_eyesmiddle.jpg	PF	neutral	no	middle	yes	1	145	m	m	93	3	90
Exp V1 Meye Znoeye	10	19	female	Finished stimuli\JJ\Neutral\jj_neutral_Face04_noeyesmiddle.jpg	JJ	neutral	no	middle	no	1	290	z	z	94	4	90
Exp V1 Meye Znoeye	10	19	female	Finished stimuli\nrR\Fear\nrr_fear_Face02_eyesmiddle.jpg	nr	fear	no	middle	yes	1	144	m	m	94	4	90
Exp V1 Meye Znoeye	10	19	female	Finished stimuli\nrR\Fear\nrr_fear_Face02_noeyesmiddle.jpg	nr	fear	no	middle	no	1	216	z	z	93	3	90
Exp V1 Meye Znoeye	10	19	female	Finished stimuli\nrR\Neutral\nrr_neutral_Face02_eyes.jpg	nr	neutral	yes	nm	yes	1	201	m	m	94	4	90
Exp V1 Meye Znoeye	10	19	female	Finished stimuli\SW\Neutral\sw_neutral_Face06_eyes.jpg	SW	neutral	yes	nm	yes	1	292	m	m	94	4	90
Exp V1 Meye Znoeye	10	19	female	Finished stimuli\MO\Fear\mo_fear_Face01_noeyes.jpg	MO	fear	yes	nm	no	0	594	z	m	94	4	90
Exp V1 Meye Znoeye	10	19	female	Finished stimuli\SW\Neutral\sw_neutral_Face06_noeyestop.jpg	SW	neutral	no	top	no	0	101	z	m	93	3	90
Exp V1 Meye Znoeye	10	19	female	Finished stimuli\PE\Fear\pe_fear_Face08_noeyes.jpg	PE	fear	yes	nm	no	1	302	z	z	94	4	90
Exp V1 Meye Znoeye	10	19	female	Finished stimuli\nrR\Fear\nrr_fear_Face02_noeyesbottom.jpg	nr	fear	no	bottom	no	0	142	z	m	93	3	90
Exp V1 Meye Znoeye	10	19	female	Finished stimuli\PE\Neutral\pe_neutral_Face08_noeyestop.jpg	PE	neutral	no	top	no	1	95	z	z	94	4	90
Exp V1 Meye Znoeye	10	19	female	Finished stimuli\JJ\Neutral\jj_neutral_Face04_eyes.jpg	JJ	neutral	yes	nm	yes	1	213	m	m	93	3	90
Exp V1 Meye Znoeye	10	19	female	Finished stimuli\SW\Fear\sw_fear_Face06_noeyesmiddle.jpg	SW	fear	no	middle	no	0	258	z	m	93	3	90
Exp V1 Meye Znoeye	10	19	female	Finished stimuli\MF\Neutral\mf_neutral_Face05_noeyesbottom.jpg	MF	neutral	no	bottom	no	1	355	z	z	93	3	90
Exp V1 Meye Znoeye	10	19	female	Finished stimuli\SW\Neutral\sw_neutral_Face06_eyesmiddle.jpg	SW	neutral	no	middle	yes	1	310	m	m	93	3	90
Exp V1 Meye Znoeye	10	19	female	Finished stimuli\MO\Neutral\mo_neutral_Face01_eyes.jpg	MO	neutral	yes	nm	yes	1	281	m	m	93	3	90
Exp V1 Meye Znoeye	10	19	female	Finished stimuli\WF\Fear\wf_fear_Face10_eyestop.jpg	WF	fear	no	top	yes	1	213	m	m	94	4	90
Exp V1 Meye Znoeye	10	19	female	Finished stimuli\PF\Fear\pf_fear_Face03_noeyesmiddle.jpg	PF	fear	no	middle	no	1	370	z	z	93	3	90
Exp V1 Meye Znoeye	10	19	female	Finished stimuli\MF\Fear\mf_fear_Face05_eyesbottom.jpg	MF	fear	no	bottom	yes	1	191	m	m	93	3	90
Exp V1 Meye Znoeye	10	19	female	Finished stimuli\PF\Neutral\pf_neutral_Face03_noeyesbottom.jpg	PF	neutral	no	bottom	no	0	147	z	m	94	4	90
Exp V1 Meye Znoeye	10	19	female	Finished stimuli\PF\Neutral\pf_neutral_Face03_eyes.jpg	PF	neutral	yes	nm	yes	1	291	m	m	93	3	90
Exp V1 Meye Znoeye	10	19	female	Finished stimuli\WF\Neutral\wf_neutral_Face10_noeyesbottom.jpg	WF	neutral	no	bottom	no	1	217	z	z	93	3	90
Exp V1 Meye Znoeye	10	19	female	Finished stimuli\SW\Fear\sw_fear_Face06_eyes.jpg	SW	fear	yes	nm	yes	1	234	m	m	94	4	90
Exp V1 Meye Znoeye	10	19	female	Finished stimuli\JJ\Neutral\jj_neutral_Face04_eyestop.jpg	JJ	neutral	no	top	yes	1	445	m	m	94	4	90
Exp V1 Meye Znoeye	10	19	female	Finished stimuli\JJ\Fear\jj_fear_Face04_noeyesmiddle.jpg	JJ	fear	no	middle	no	1	267	z	z	94	4	90
Exp V1 Meye Znoeye	10	19	female	Finished stimuli\PE\Fear\pe_fear_Face08_noeyesmiddle.jpg	PE	fear	no	middle	no	1	187	z	z	93	3	90
Exp V1 Meye Znoeye	10	19	female	Finished stimuli\nrR\Fear\nrr_fear_Face02_noeyestop.jpg	nr	fear	no	top	no	0	260	z	m	93	3	90
Exp V1 Meye Znoeye	10	19	female	Finished stimuli\PE\Neutral\pe_neutral_Face08_noeyes.jpg	PE	neutral	yes	nm	no	1	580	z	z	93	3	90
Exp V1 Meye Znoeye	10	19	female	Finished stimuli\MO\Fear\mo_fear_Face01_eyestop.jpg	MO	fear	no	top	yes	1	213	m	m	93	3	90
Exp V1 Meye Znoeye	10	19	female	Finished stimuli\nrR\Fear\nrr_fear_Face02_noeyes.jpg	nr	fear	yes	nm	no	1	251	z	z	93	3	90
Exp V1 Meye Znoeye	10	19	female	Finished stimuli\MO\Fear\mo_fear_Face01_eyesmiddle.jpg	MO	fear	no	middle	yes	1	193	m	m	93	3	90
Exp V1 Meye Znoeye	10	19	female	Finished stimuli\nrR\Neutral\nrr_neutral_Face02_noeyesbottom.jpg	nr	neutral	no	bottom	no	1	212	z	z	93	3	90
Exp V1 Meye Znoeye	10	19	female	Finished stimuli\SW\Fear\sw_fear_Face06_noeyesbottom.jpg	SW	fear	no	bottom	no	0	210	z	m	93	3	90
Exp V1 Meye Znoeye	10	19	female	Finished stimuli\JJ\Neutral\jj_neutral_Face04_eyesmiddle.jpg	JJ	neutral	no	middle	yes	1	224	m	m	94	4	90
Exp V1 Meye Znoeye	10	19	female	Finished stimuli\MF\Fear\mf_fear_Face05_noeyesmiddle.jpg	MF	fear	no	middle	no	1	64	z	z	93	3	90
Exp V1 Meye Znoeye	10	19	female	Finished stimuli\MO\Neutral\mo_neutral_Face01_eyesmiddle.jpg	MO	neutral	no	middle	yes	1	457	m	m	94	4	90
Exp V1 Meye Znoeye	10	19	female	Finished stimuli\MO\Neutral\mo_neutral_Face01_noeyesbottom.jpg	MO	neutral	no	bottom	no	1	305	z	z	93	3	90
Exp V1 Meye Znoeye	10	19	female	Finished stimuli\nrR\Neutral\nrr_neutral_Face02_noeyes.jpg	nr	neutral	yes	nm	no	0	361	z	m	93	3	90
Exp V1 Meye Znoeye	10	19	female	Finished stimuli\WF\Neutral\wf_neutral_Face10_noeyestop.jpg	WF	neutral	no	top	no	1	564	z	z	93	3	90
Exp V1 Meye Znoeye	10	19	female	Finished stimuli\MF\Neutral\mf_neutral_Face05_eyesmiddle.jpg	MF	neutral	no	middle	yes	1	186	m	m	93	3	90
Exp V1 Meye Znoeye	10	19	female	Finished stimuli\WF\Fear\wf_fear_Face10_noeyes.jpg	WF	fear	yes	nm	no	1	259	z	z	93	3	90
Exp V1 Meye Znoeye	10	19	female	Finished stimuli\WF\Neutral\wf_neutral_Face10_eyesbottom.jpg	WF	neutral	no	bottom	yes	0	267	m	z	93	3	90
Exp V1 Meye Znoeye	10	19	female	Finished stimuli\JJ\Fear\jj_fear_Face04_eyes.jpg	JJ	fear	yes	nm	yes	1	220	m	m	93	3	90
Exp V1 Meye Znoeye	10	19	female	Finished stimuli\SW\Neutral\sw_neutral_Face06_noeyesmiddle.jpg	SW	neutral	no	middle	no	1	453	z	z	93	3	90
Exp V1 Meye Znoeye	10	19	female	Finished stimuli\MO\Fear\mo_fear_Face01_eyes.jpg	MO	fear	yes	nm	yes	1	243	m	m	93	3	90
Exp V1 Meye Znoeye	10	19	female	Finished stimuli\SW\Neutral\sw_neutral_Face06_noeyes.jpg	SW	neutral	yes	nm	no	1	184	z	z	93	3	90
Exp V1 Meye Znoeye	10	19	female	Finished stimuli\nrR\Neutral\nrr_neutral_Face02_noeyestop.jpg	nr	neutral	no	top	no	0	233	z	m	93	3	90
Exp V1 Meye Znoeye	10	19	female	Finished stimuli\JJ\Neutral\jj_neutral_Face04_noeyes.jpg	JJ	neutral	yes	nm	no	1	252	z	z	93	3	90
Exp V1 Meye Znoeye	10	19	female	Finished stimuli\WF\Neutral\wf_neutral_Face10_eyestop.jpg	WF	neutral	no	top	yes	1	186	m	m	93	3	90
Exp V1 Meye Znoeye	10	19	female	Finished stimuli\PE\Fear\pe_fear_Face08_eyes.jpg	PE	fear	yes	nm	yes	1	195	m	m	93	3	90
Exp V1 Meye Znoeye	10	19	female	Finished stimuli\MO\Neutral\mo_neutral_Face01_noeyesmiddle.jpg	MO	neutral	no	middle	no	1	238	z	z	94	4	90
Exp V1 Meye Znoeye	10	19	female	Finished stimuli\PE\Neutral\pe_neutral_Face08_noeyesbottom.jpg	PE	neutral	no	bottom	no	1	177	z	z	93	3	90
Exp V1 Meye Znoeye	10	19	female	Finished stimuli\PE\Neutral\pe_neutral_Face08_noeyesmiddle.jpg	PE	neutral	no	middle	no	1	250	z	z	93	3	90
Exp V1 Meye Znoeye	10	19	female	Finished stimuli\PF\Neutral\pf_neutral_Face03_noeyesmiddle.jpg	PF	neutral	no	middle	no	1	207	z	z	93	3	90
Exp V1 Meye Znoeye	10	19	female	Finished stimuli\MF\Neutral\mf_neutral_Face05_eyesbottom.jpg	MF	neutral	no	bottom	yes	1	325	m	m	93	3	90
Exp V1 Meye Znoeye	10	19	female	Finished stimuli\WF\Neutral\wf_neutral_Face10_noeyesmiddle.jpg	WF	neutral	no	middle	no	1	243	z	z	93	3	90
Exp V1 Meye Znoeye	10	19	female	Finished stimuli\PE\Fear\pe_fear_Face08_noeyesbottom.jpg	PE	fear	no	bottom	no	0	200	z	m	93	3	90
Exp V1 Meye Znoeye	10	19	female	Finished stimuli\MF\Neutral\mf_neutral_Face05_eyestop.jpg	MF	neutral	no	top	yes	1	219	m	m	93	3	90
Exp V1 Meye Znoeye	10	19	female	Finished stimuli\SW\Neutral\sw_neutral_Face06_eyestop.jpg	SW	neutral	no	top	yes	1	308	m	m	94	4	90
Exp V1 Meye Znoeye	10	19	female	Finished stimuli\SW\Neutral\sw_neutral_Face06_noeyesbottom.jpg	SW	neutral	no	bottom	no	1	295	z	z	93	3	90
Exp V1 Meye Znoeye	10	19	female	Finished stimuli\nrR\Neutral\nrr_neutral_Face02_noeyesmiddle.jpg	nr	neutral	no	middle	no	1	336	z	z	94	4	90
Exp V1 Meye Znoeye	10	19	female	Finished stimuli\PF\Neutral\pf_neutral_Face03_noeyestop.jpg	PF	neutral	no	top	no	0	176	z	m	93	3	90
Exp V1 Meye Znoeye	10	19	female	Finished stimuli\PE\Neutral\pe_neutral_Face08_eyesmiddle.jpg	PE	neutral	no	middle	yes	0	281	m	z	94	4	90
Exp V1 Meye Znoeye	10	19	female	Finished stimuli\SW\Neutral\sw_neutral_Face06_eyesbottom.jpg	SW	neutral	no	bottom	yes	1	308	m	m	93	3	90
Exp V1 Meye Znoeye	10	19	female	Finished stimuli\MF\Neutral\mf_neutral_Face05_eyes.jpg	MF	neutral	yes	nm	yes	1	213	m	m	93	3	90
Exp V1 Meye Znoeye	10	19	female	Finished stimuli\JJ\Neutral\jj_neutral_Face04_eyesbottom.jpg	JJ	neutral	no	bottom	yes	1	370	m	m	93	3	90
Exp V1 Meye Znoeye	10	19	female	Finished stimuli\MO\Neutral\mo_neutral_Face01_eyesbottom.jpg	MO	neutral	no	bottom	yes	1	184	m	m	93	3	90
Exp V1 Meye Znoeye	10	19	female	Finished stimuli\SW\Fear\sw_fear_Face06_eyestop.jpg	SW	fear	no	top	yes	1	217	m	m	93	3	90
Exp V1 Meye Znoeye	10	19	female	Finished stimuli\nrR\Fear\nrr_fear_Face02_eyes.jpg	nr	fear	yes	nm	yes	1	209	m	m	93	3	90
Exp V1 Meye Znoeye	10	19	female	Finished stimuli\SW\Fear\sw_fear_Face06_eyesmiddle.jpg	SW	fear	no	middle	yes	1	215	m	m	93	3	90
Exp V1 Meye Znoeye	10	19	female	Finished stimuli\JJ\Fear\jj_fear_Face04_noeyesbottom.jpg	JJ	fear	no	bottom	no	0	104	z	m	94	4	90
Exp V1 Meye Znoeye	10	19	female	Finished stimuli\MF\Fear\mf_fear_Face05_eyes.jpg	MF	fear	yes	nm	yes	1	320	m	m	93	3	90
Exp V1 Meye Znoeye	10	19	female	Finished stimuli\MO\Fear\mo_fear_Face01_noeyesmiddle.jpg	MO	fear	no	middle	no	1	452	z	z	93	3	90
Exp V1 Meye Znoeye	10	19	female	Finished stimuli\nrR\Fear\nrr_fear_Face02_eyesbottom.jpg	nr	fear	no	bottom	yes	1	234	m	m	93	3	90
Exp V1 Meye Znoeye	10	19	female	Finished stimuli\MF\Neutral\mf_neutral_Face05_noeyes.jpg	MF	neutral	yes	nm	no	0	269	z	m	94	4	90
Exp V1 Meye Znoeye	10	19	female	Finished stimuli\nrR\Neutral\nrr_neutral_Face02_eyesbottom.jpg	nr	neutral	no	bottom	yes	1	352	m	m	93	3	90
Exp V1 Meye Znoeye	10	19	female	Finished stimuli\JJ\Fear\jj_fear_Face04_noeyestop.jpg	JJ	fear	no	top	no	0	266	z	m	93	3	90
Exp V1 Meye Znoeye	10	19	female	Finished stimuli\WF\Fear\wf_fear_Face10_eyesmiddle.jpg	WF	fear	no	middle	yes	1	99	m	m	94	4	90
Exp V1 Meye Znoeye	10	19	female	Finished stimuli\MO\Fear\mo_fear_Face01_noeyesbottom.jpg	MO	fear	no	bottom	no	1	299	z	z	93	3	90
Exp V1 Meye Znoeye	10	19	female	Finished stimuli\MF\Neutral\mf_neutral_Face05_noeyestop.jpg	MF	neutral	no	top	no	1	260	z	z	93	3	90
Exp V1 Meye Znoeye	10	19	female	Finished stimuli\PF\Fear\pf_fear_Face03_noeyesbottom.jpg	PF	fear	no	bottom	no	1	180	z	z	93	3	90
Exp V1 Meye Znoeye	10	19	female	Finished stimuli\PF\Fear\pf_fear_Face03_eyesbottom.jpg	PF	fear	no	bottom	yes	1	117	m	m	93	3	90
Exp V1 Meye Znoeye	10	19	female	Finished stimuli\MO\Neutral\mo_neutral_Face01_noeyes.jpg	MO	neutral	yes	nm	no	0	96	z	m	93	3	90
Exp V1 Meye Znoeye	10	19	female	Finished stimuli\PF\Fear\pf_fear_Face03_eyesmiddle.jpg	PF	fear	no	middle	yes	1	105	m	m	94	4	90
Exp V1 Meye Znoeye	10	19	female	Finished stimuli\WF\Fear\wf_fear_Face10_noeyestop.jpg	WF	fear	no	top	no	0	257	z	m	93	3	90
Exp V1 Meye Znoeye	10	19	female	Finished stimuli\MO\Fear\mo_fear_Face01_noeyestop.jpg	MO	fear	no	top	no	1	442	z	z	94	4	90
Exp V1 Meye Znoeye	10	19	female	Finished stimuli\JJ\Fear\jj_fear_Face04_noeyes.jpg	JJ	fear	yes	nm	no	1	232	z	z	94	4	90
Exp V1 Meye Znoeye	10	19	female	Finished stimuli\SW\Fear\sw_fear_Face06_eyesbottom.jpg	SW	fear	no	bottom	yes	1	163	m	m	94	4	90
Exp V1 Meye Znoeye	10	19	female	Finished stimuli\PF\Fear\pf_fear_Face03_noeyestop.jpg	PF	fear	no	top	no	1	313	z	z	94	4	90
Exp V1 Meye Znoeye	10	19	female	Finished stimuli\WF\Fear\wf_fear_Face10_eyesbottom.jpg	WF	fear	no	bottom	yes	1	52	m	m	93	3	90
Exp V1 Meye Znoeye	10	19	female	Finished stimuli\MF\Fear\mf_fear_Face05_noeyes.jpg	MF	fear	yes	nm	no	0	1610	z	m	94	4	90
Exp V1 Meye Znoeye	10	19	female	Finished stimuli\nrR\Neutral\nrr_neutral_Face02_eyesmiddle.jpg	nr	neutral	no	middle	yes	1	184	m	m	93	3	90
Exp V1 Meye Znoeye	10	19	female	Finished stimuli\PF\Neutral\pf_neutral_Face03_eyestop.jpg	PF	neutral	no	top	yes	1	233	m	m	94	4	90
Exp V1 Meye Znoeye	15	25	female	Finished stimuli\nrR\Fear\nrr_fear_Face02_noeyes.jpg	nr	fear	yes	nm	no	1	1387	z	z	66	6	60
Exp V1 Meye Znoeye	15	25	female	Finished stimuli\SW\Neutral\sw_neutral_Face06_eyes.jpg	SW	neutral	yes	nm	yes	1	615	m	m	66	6	60
Exp V1 Meye Znoeye	15	25	female	Finished stimuli\nrR\Neutral\nrr_neutral_Face02_noeyes.jpg	nr	neutral	yes	nm	no	1	256	z	z	67	7	60
Exp V1 Meye Znoeye	15	25	female	Finished stimuli\WF\Neutral\wf_neutral_Face10_noeyesmiddle.jpg	WF	neutral	no	middle	no	1	280	z	z	66	6	60
Exp V1 Meye Znoeye	15	25	female	Finished stimuli\WF\Neutral\wf_neutral_Face10_eyestop.jpg	WF	neutral	no	top	yes	1	262	m	m	66	6	60
Exp V1 Meye Znoeye	15	25	female	Finished stimuli\SW\Neutral\sw_neutral_Face06_eyestop.jpg	SW	neutral	no	top	yes	1	305	m	m	66	6	60
Exp V1 Meye Znoeye	15	25	female	Finished stimuli\MO\Neutral\mo_neutral_Face01_noeyesmiddle.jpg	MO	neutral	no	middle	no	1	268	z	z	67	7	60
Exp V1 Meye Znoeye	15	25	female	Finished stimuli\MO\Neutral\mo_neutral_Face01_noeyestop.jpg	MO	neutral	no	top	no	1	381	z	z	66	6	60
Exp V1 Meye Znoeye	15	25	female	Finished stimuli\MO\Neutral\mo_neutral_Face01_eyes.jpg	MO	neutral	yes	nm	yes	1	368	m	m	66	6	60
Exp V1 Meye Znoeye	15	25	female	Finished stimuli\MO\Fear\mo_fear_Face01_eyes.jpg	MO	fear	yes	nm	yes	1	385	m	m	67	7	60
Exp V1 Meye Znoeye	15	25	female	Finished stimuli\PF\Fear\pf_fear_Face03_noeyesbottom.jpg	PF	fear	no	bottom	no	1	948	z	z	66	6	60
Exp V1 Meye Znoeye	15	25	female	Finished stimuli\MF\Fear\mf_fear_Face05_noeyesmiddle.jpg	MF	fear	no	middle	no	1	466	z	z	67	7	60
Exp V1 Meye Znoeye	15	25	female	Finished stimuli\PF\Fear\pf_fear_Face03_eyesmiddle.jpg	PF	fear	no	middle	yes	1	310	m	m	67	7	60
Exp V1 Meye Znoeye	15	25	female	Finished stimuli\nrR\Neutral\nrr_neutral_Face02_noeyesmiddle.jpg	nr	neutral	no	middle	no	1	2546	z	z	67	7	60
Exp V1 Meye Znoeye	15	25	female	Finished stimuli\nrR\Neutral\nrr_neutral_Face02_eyes.jpg	nr	neutral	yes	nm	yes	0	759	m	z	67	7	60
Exp V1 Meye Znoeye	15	25	female	Finished stimuli\SW\Fear\sw_fear_Face06_eyesbottom.jpg	SW	fear	no	bottom	yes	0	301	m	z	66	6	60
Exp V1 Meye Znoeye	15	25	female	Finished stimuli\PE\Fear\pe_fear_Face08_noeyes.jpg	PE	fear	yes	nm	no	1	1216	z	z	66	6	60
Exp V1 Meye Znoeye	15	25	female	Finished stimuli\MO\Neutral\mo_neutral_Face01_noeyesbottom.jpg	MO	neutral	no	bottom	no	0	1164	z	m	67	7	60
Exp V1 Meye Znoeye	15	25	female	Finished stimuli\MO\Fear\mo_fear_Face01_noeyestop.jpg	MO	fear	no	top	no	0	309	z	m	67	7	60
Exp V1 Meye Znoeye	15	25	female	Finished stimuli\SW\Fear\sw_fear_Face06_noeyestop.jpg	SW	fear	no	top	no	0	515	z	m	67	7	60
Exp V1 Meye Znoeye	15	25	female	Finished stimuli\PF\Neutral\pf_neutral_Face03_eyesmiddle.jpg	PF	neutral	no	middle	yes	1	1313	m	m	67	7	60
Exp V1 Meye Znoeye	15	25	female	Finished stimuli\JJ\Fear\jj_fear_Face04_eyestop.jpg	JJ	fear	no	top	yes	1	2439	m	m	66	6	60
Exp V1 Meye Znoeye	15	25	female	Finished stimuli\PE\Neutral\pe_neutral_Face08_noeyestop.jpg	PE	neutral	no	top	no	1	518	z	z	66	6	60
Exp V1 Meye Znoeye	15	25	female	Finished stimuli\SW\Neutral\sw_neutral_Face06_eyesmiddle.jpg	SW	neutral	no	middle	yes	1	484	m	m	66	6	60
Exp V1 Meye Znoeye	15	25	female	Finished stimuli\nrR\Fear\nrr_fear_Face02_eyesmiddle.jpg	nr	fear	no	middle	yes	1	333	m	m	67	7	60
Exp V1 Meye Znoeye	15	25	female	Finished stimuli\SW\Neutral\sw_neutral_Face06_noeyesbottom.jpg	SW	neutral	no	bottom	no	1	333	z	z	66	6	60
Exp V1 Meye Znoeye	15	25	female	Finished stimuli\MF\Fear\mf_fear_Face05_noeyesbottom.jpg	MF	fear	no	bottom	no	1	454	z	z	67	7	60
Exp V1 Meye Znoeye	15	25	female	Finished stimuli\JJ\Fear\jj_fear_Face04_noeyesbottom.jpg	JJ	fear	no	bottom	no	1	629	z	z	67	7	60
Exp V1 Meye Znoeye	15	25	female	Finished stimuli\JJ\Neutral\jj_neutral_Face04_eyesmiddle.jpg	JJ	neutral	no	middle	yes	1	427	m	m	67	7	60
Exp V1 Meye Znoeye	15	25	female	Finished stimuli\PE\Fear\pe_fear_Face08_eyesmiddle.jpg	PE	fear	no	middle	yes	1	399	m	m	67	7	60
Exp V1 Meye Znoeye	15	25	female	Finished stimuli\PF\Fear\pf_fear_Face03_eyesbottom.jpg	PF	fear	no	bottom	yes	1	445	m	m	67	7	60
Exp V1 Meye Znoeye	15	25	female	Finished stimuli\SW\Fear\sw_fear_Face06_eyesmiddle.jpg	SW	fear	no	middle	yes	1	325	m	m	67	7	60
Exp V1 Meye Znoeye	15	25	female	Finished stimuli\WF\Neutral\wf_neutral_Face10_noeyesbottom.jpg	WF	neutral	no	bottom	no	1	414	z	z	66	6	60
Exp V1 Meye Znoeye	15	25	female	Finished stimuli\WF\Neutral\wf_neutral_Face10_noeyestop.jpg	WF	neutral	no	top	no	1	559	z	z	67	7	60
Exp V1 Meye Znoeye	15	25	female	Finished stimuli\MF\Neutral\mf_neutral_Face05_eyesbottom.jpg	MF	neutral	no	bottom	yes	1	893	m	m	67	7	60
Exp V1 Meye Znoeye	15	25	female	Finished stimuli\MF\Neutral\mf_neutral_Face05_eyes.jpg	MF	neutral	yes	nm	yes	1	285	m	m	67	7	60
Exp V1 Meye Znoeye	15	25	female	Finished stimuli\MF\Fear\mf_fear_Face05_eyesbottom.jpg	MF	fear	no	bottom	yes	1	270	m	m	66	6	60
Exp V1 Meye Znoeye	15	25	female	Finished stimuli\JJ\Fear\jj_fear_Face04_noeyesmiddle.jpg	JJ	fear	no	middle	no	1	276	z	z	67	7	60
Exp V1 Meye Znoeye	15	25	female	Finished stimuli\WF\Fear\wf_fear_Face10_eyesbottom.jpg	WF	fear	no	bottom	yes	1	722	m	m	67	7	60
Exp V1 Meye Znoeye	15	25	female	Finished stimuli\MF\Fear\mf_fear_Face05_noeyestop.jpg	MF	fear	no	top	no	1	467	z	z	67	7	60
Exp V1 Meye Znoeye	15	25	female	Finished stimuli\SW\Fear\sw_fear_Face06_noeyesmiddle.jpg	SW	fear	no	middle	no	1	710	z	z	67	7	60
Exp V1 Meye Znoeye	15	25	female	Finished stimuli\WF\Fear\wf_fear_Face10_eyesmiddle.jpg	WF	fear	no	middle	yes	1	196	m	m	66	6	60
Exp V1 Meye Znoeye	15	25	female	Finished stimuli\PE\Fear\pe_fear_Face08_noeyestop.jpg	PE	fear	no	top	no	0	2089	z	m	67	7	60
Exp V1 Meye Znoeye	15	25	female	Finished stimuli\PF\Neutral\pf_neutral_Face03_eyes.jpg	PF	neutral	yes	nm	yes	1	298	m	m	66	6	60
Exp V1 Meye Znoeye	15	25	female	Finished stimuli\MO\Neutral\mo_neutral_Face01_eyestop.jpg	MO	neutral	no	top	yes	1	1325	m	m	67	7	60
Exp V1 Meye Znoeye	15	25	female	Finished stimuli\MO\Fear\mo_fear_Face01_eyesbottom.jpg	MO	fear	no	bottom	yes	1	999	m	m	67	7	60
Exp V1 Meye Znoeye	15	25	female	Finished stimuli\JJ\Fear\jj_fear_Face04_noeyes.jpg	JJ	fear	yes	nm	no	1	301	z	z	67	7	60
Exp V1 Meye Znoeye	15	25	female	Finished stimuli\PE\Neutral\pe_neutral_Face08_eyes.jpg	PE	neutral	yes	nm	yes	1	360	m	m	66	6	60
Exp V1 Meye Znoeye	15	25	female	Finished stimuli\JJ\Neutral\jj_neutral_Face04_noeyestop.jpg	JJ	neutral	no	top	no	1	566	z	z	66	6	60
Exp V1 Meye Znoeye	15	25	female	Finished stimuli\MF\Neutral\mf_neutral_Face05_noeyesmiddle.jpg	MF	neutral	no	middle	no	0	359	z	m	67	7	60
Exp V1 Meye Znoeye	15	25	female	Finished stimuli\SW\Fear\sw_fear_Face06_noeyesbottom.jpg	SW	fear	no	bottom	no	1	365	z	z	67	7	60
Exp V1 Meye Znoeye	15	25	female	Finished stimuli\PF\Neutral\pf_neutral_Face03_noeyesmiddle.jpg	PF	neutral	no	middle	no	1	701	z	z	66	6	60
Exp V1 Meye Znoeye	15	25	female	Finished stimuli\MF\Fear\mf_fear_Face05_eyestop.jpg	MF	fear	no	top	yes	1	457	m	m	67	7	60
Exp V1 Meye Znoeye	15	25	female	Finished stimuli\JJ\Fear\jj_fear_Face04_noeyestop.jpg	JJ	fear	no	top	no	1	444	z	z	67	7	60
Exp V1 Meye Znoeye	15	25	female	Finished stimuli\PF\Fear\pf_fear_Face03_eyes.jpg	PF	fear	yes	nm	yes	1	332	m	m	67	7	60
Exp V1 Meye Znoeye	15	25	female	Finished stimuli\MF\Fear\mf_fear_Face05_noeyes.jpg	MF	fear	yes	nm	no	1	405	z	z	66	6	60
Exp V1 Meye Znoeye	15	25	female	Finished stimuli\MO\Neutral\mo_neutral_Face01_noeyes.jpg	MO	neutral	yes	nm	no	1	238	z	z	67	7	60
Exp V1 Meye Znoeye	15	25	female	Finished stimuli\nrR\Neutral\nrr_neutral_Face02_eyesmiddle.jpg	nr	neutral	no	middle	yes	1	412	m	m	67	7	60
Exp V1 Meye Znoeye	15	25	female	Finished stimuli\PF\Neutral\pf_neutral_Face03_eyestop.jpg	PF	neutral	no	top	yes	1	676	m	m	66	6	60
Exp V1 Meye Znoeye	15	25	female	Finished stimuli\WF\Neutral\wf_neutral_Face10_eyesmiddle.jpg	WF	neutral	no	middle	yes	0	465	m	z	66	6	60
Exp V1 Meye Znoeye	15	25	female	Finished stimuli\PE\Fear\pe_fear_Face08_eyestop.jpg	PE	fear	no	top	yes	1	557	m	m	67	7	60
Exp V1 Meye Znoeye	15	25	female	Finished stimuli\MF\Neutral\mf_neutral_Face05_eyesmiddle.jpg	MF	neutral	no	middle	yes	1	411	m	m	67	7	60
Exp V1 Meye Znoeye	15	25	female	Finished stimuli\MO\Neutral\mo_neutral_Face01_eyesbottom.jpg	MO	neutral	no	bottom	yes	1	787	m	m	66	6	60
Exp V1 Meye Znoeye	15	25	female	Finished stimuli\SW\Neutral\sw_neutral_Face06_noeyestop.jpg	SW	neutral	no	top	no	0	1199	z	m	67	7	60
Exp V1 Meye Znoeye	15	25	female	Finished stimuli\SW\Fear\sw_fear_Face06_noeyes.jpg	SW	fear	yes	nm	no	0	541	z	m	66	6	60
Exp V1 Meye Znoeye	15	25	female	Finished stimuli\WF\Fear\wf_fear_Face10_noeyes.jpg	WF	fear	yes	nm	no	0	272	z	m	67	7	60
Exp V1 Meye Znoeye	15	25	female	Finished stimuli\JJ\Neutral\jj_neutral_Face04_noeyesbottom.jpg	JJ	neutral	no	bottom	no	0	502	z	m	66	6	60
Exp V1 Meye Znoeye	15	25	female	Finished stimuli\nrR\Neutral\nrr_neutral_Face02_noeyestop.jpg	nr	neutral	no	top	no	0	338	z	m	67	7	60
Exp V1 Meye Znoeye	15	25	female	Finished stimuli\nrR\Neutral\nrr_neutral_Face02_eyestop.jpg	nr	neutral	no	top	yes	1	277	m	m	67	7	60
Exp V1 Meye Znoeye	15	25	female	Finished stimuli\MF\Neutral\mf_neutral_Face05_noeyesbottom.jpg	MF	neutral	no	bottom	no	1	539	z	z	67	7	60
Exp V1 Meye Znoeye	15	25	female	Finished stimuli\PE\Neutral\pe_neutral_Face08_eyesmiddle.jpg	PE	neutral	no	middle	yes	1	678	m	m	66	6	60
Exp V1 Meye Znoeye	15	25	female	Finished stimuli\SW\Fear\sw_fear_Face06_eyes.jpg	SW	fear	yes	nm	yes	1	324	m	m	66	6	60
Exp V1 Meye Znoeye	15	25	female	Finished stimuli\PF\Fear\pf_fear_Face03_noeyestop.jpg	PF	fear	no	top	no	0	349	z	m	67	7	60
Exp V1 Meye Znoeye	15	25	female	Finished stimuli\nrR\Fear\nrr_fear_Face02_eyes.jpg	nr	fear	yes	nm	yes	1	523	m	m	67	7	60
Exp V1 Meye Znoeye	15	25	female	Finished stimuli\MF\Neutral\mf_neutral_Face05_eyestop.jpg	MF	neutral	no	top	yes	1	315	m	m	67	7	60
Exp V1 Meye Znoeye	15	25	female	Finished stimuli\MO\Fear\mo_fear_Face01_noeyes.jpg	MO	fear	yes	nm	no	0	513	z	m	66	6	60
Exp V1 Meye Znoeye	15	25	female	Finished stimuli\PE\Fear\pe_fear_Face08_noeyesmiddle.jpg	PE	fear	no	middle	no	1	358	z	z	66	6	60
Exp V1 Meye Znoeye	15	25	female	Finished stimuli\WF\Fear\wf_fear_Face10_noeyesbottom.jpg	WF	fear	no	bottom	no	1	476	z	z	66	6	60
Exp V1 Meye Znoeye	15	25	female	Finished stimuli\MO\Fear\mo_fear_Face01_eyesmiddle.jpg	MO	fear	no	middle	yes	1	562	m	m	66	6	60
Exp V1 Meye Znoeye	15	25	female	Finished stimuli\MF\Neutral\mf_neutral_Face05_noeyes.jpg	MF	neutral	yes	nm	no	0	595	z	m	67	7	60
Exp V1 Meye Znoeye	15	25	female	Finished stimuli\SW\Neutral\sw_neutral_Face06_eyesbottom.jpg	SW	neutral	no	bottom	yes	1	401	m	m	67	7	60
Exp V1 Meye Znoeye	15	25	female	Finished stimuli\WF\Neutral\wf_neutral_Face10_eyes.jpg	WF	neutral	yes	nm	yes	1	439	m	m	67	7	60
Exp V1 Meye Znoeye	15	25	female	Finished stimuli\WF\Fear\wf_fear_Face10_eyestop.jpg	WF	fear	no	top	yes	1	373	m	m	67	7	60
Exp V1 Meye Znoeye	15	25	female	Finished stimuli\JJ\Fear\jj_fear_Face04_eyes.jpg	JJ	fear	yes	nm	yes	1	429	m	m	67	7	60
Exp V1 Meye Znoeye	15	25	female	Finished stimuli\MO\Neutral\mo_neutral_Face01_eyesmiddle.jpg	MO	neutral	no	middle	yes	1	371	m	m	67	7	60
Exp V1 Meye Znoeye	15	25	female	Finished stimuli\PE\Neutral\pe_neutral_Face08_noeyesbottom.jpg	PE	neutral	no	bottom	no	0	476	z	m	67	7	60
Exp V1 Meye Znoeye	15	25	female	Finished stimuli\JJ\Neutral\jj_neutral_Face04_eyestop.jpg	JJ	neutral	no	top	yes	1	626	m	m	67	7	60
Exp V1 Meye Znoeye	15	25	female	Finished stimuli\SW\Neutral\sw_neutral_Face06_noeyesmiddle.jpg	SW	neutral	no	middle	no	1	621	z	z	66	6	60
Exp V1 Meye Znoeye	15	25	female	Finished stimuli\MF\Neutral\mf_neutral_Face05_noeyestop.jpg	MF	neutral	no	top	no	1	369	z	z	67	7	60
Exp V1 Meye Znoeye	15	25	female	Finished stimuli\PF\Fear\pf_fear_Face03_noeyesmiddle.jpg	PF	fear	no	middle	no	1	257	z	z	66	6	60
Exp V1 Meye Znoeye	15	25	female	Finished stimuli\JJ\Fear\jj_fear_Face04_eyesmiddle.jpg	JJ	fear	no	middle	yes	1	468	m	m	67	7	60
Exp V1 Meye Znoeye	15	25	female	Finished stimuli\SW\Neutral\sw_neutral_Face06_noeyes.jpg	SW	neutral	yes	nm	no	1	418	z	z	67	7	60
Exp V1 Meye Znoeye	15	25	female	Finished stimuli\PF\Neutral\pf_neutral_Face03_noeyesbottom.jpg	PF	neutral	no	bottom	no	1	494	z	z	67	7	60
Exp V1 Meye Znoeye	15	25	female	Finished stimuli\PE\Neutral\pe_neutral_Face08_eyesbottom.jpg	PE	neutral	no	bottom	yes	1	293	m	m	67	7	60
Exp V1 Meye Znoeye	15	25	female	Finished stimuli\SW\Fear\sw_fear_Face06_eyestop.jpg	SW	fear	no	top	yes	0	350	m	z	66	6	60
Exp V1 Meye Znoeye	15	25	female	Finished stimuli\PE\Neutral\pe_neutral_Face08_noeyes.jpg	PE	neutral	yes	nm	no	0	308	z	m	67	7	60
Exp V1 Meye Znoeye	15	25	female	Finished stimuli\MF\Fear\mf_fear_Face05_eyes.jpg	MF	fear	yes	nm	yes	0	314	m	z	67	7	60
Exp V1 Meye Znoeye	15	25	female	Finished stimuli\PE\Fear\pe_fear_Face08_eyesbottom.jpg	PE	fear	no	bottom	yes	1	336	m	m	67	7	60
Exp V1 Meye Znoeye	15	25	female	Finished stimuli\WF\Fear\wf_fear_Face10_noeyestop.jpg	WF	fear	no	top	no	0	251	z	m	66	6	60
Exp V1 Meye Znoeye	15	25	female	Finished stimuli\PF\Fear\pf_fear_Face03_eyestop.jpg	PF	fear	no	top	yes	1	307	m	m	67	7	60
Exp V1 Meye Znoeye	15	25	female	Finished stimuli\nrR\Fear\nrr_fear_Face02_eyestop.jpg	nr	fear	no	top	yes	1	319	m	m	67	7	60
Exp V1 Meye Znoeye	15	25	female	Finished stimuli\nrR\Fear\nrr_fear_Face02_noeyestop.jpg	nr	fear	no	top	no	1	365	z	z	67	7	60
Exp V1 Meye Znoeye	15	25	female	Finished stimuli\PF\Neutral\pf_neutral_Face03_noeyes.jpg	PF	neutral	yes	nm	no	1	189	z	z	66	6	60
Exp V1 Meye Znoeye	15	25	female	Finished stimuli\PF\Fear\pf_fear_Face03_noeyes.jpg	PF	fear	yes	nm	no	1	187	z	z	66	6	60
Exp V1 Meye Znoeye	15	25	female	Finished stimuli\WF\Fear\wf_fear_Face10_noeyesmiddle.jpg	WF	fear	no	middle	no	1	78	z	z	66	6	60
Exp V1 Meye Znoeye	15	25	female	Finished stimuli\MO\Fear\mo_fear_Face01_eyestop.jpg	MO	fear	no	top	yes	1	308	m	m	66	6	60
Exp V1 Meye Znoeye	15	25	female	Finished stimuli\nrR\Neutral\nrr_neutral_Face02_noeyesbottom.jpg	nr	neutral	no	bottom	no	0	215	z	m	66	6	60
Exp V1 Meye Znoeye	15	25	female	Finished stimuli\PE\Fear\pe_fear_Face08_noeyesbottom.jpg	PE	fear	no	bottom	no	0	122	z	m	67	7	60
Exp V1 Meye Znoeye	15	25	female	Finished stimuli\MO\Fear\mo_fear_Face01_noeyesbottom.jpg	MO	fear	no	bottom	no	1	483	z	z	67	7	60
Exp V1 Meye Znoeye	15	25	female	Finished stimuli\JJ\Fear\jj_fear_Face04_eyesbottom.jpg	JJ	fear	no	bottom	yes	1	308	m	m	67	7	60
Exp V1 Meye Znoeye	15	25	female	Finished stimuli\PE\Neutral\pe_neutral_Face08_noeyesmiddle.jpg	PE	neutral	no	middle	no	1	383	z	z	67	7	60
Exp V1 Meye Znoeye	15	25	female	Finished stimuli\nrR\Fear\nrr_fear_Face02_noeyesmiddle.jpg	nr	fear	no	middle	no	1	306	z	z	66	6	60
Exp V1 Meye Znoeye	15	25	female	Finished stimuli\WF\Neutral\wf_neutral_Face10_eyesbottom.jpg	WF	neutral	no	bottom	yes	1	381	m	m	67	7	60
Exp V1 Meye Znoeye	15	25	female	Finished stimuli\nrR\Fear\nrr_fear_Face02_eyesbottom.jpg	nr	fear	no	bottom	yes	1	425	m	m	67	7	60
Exp V1 Meye Znoeye	15	25	female	Finished stimuli\JJ\Neutral\jj_neutral_Face04_noeyesmiddle.jpg	JJ	neutral	no	middle	no	1	363	z	z	67	7	60
Exp V1 Meye Znoeye	15	25	female	Finished stimuli\PE\Neutral\pe_neutral_Face08_eyestop.jpg	PE	neutral	no	top	yes	1	427	m	m	67	7	60
Exp V1 Meye Znoeye	15	25	female	Finished stimuli\JJ\Neutral\jj_neutral_Face04_eyes.jpg	JJ	neutral	yes	nm	yes	1	255	m	m	67	7	60
Exp V1 Meye Znoeye	15	25	female	Finished stimuli\WF\Neutral\wf_neutral_Face10_noeyes.jpg	WF	neutral	yes	nm	no	1	234	z	z	66	6	60
Exp V1 Meye Znoeye	15	25	female	Finished stimuli\MF\Fear\mf_fear_Face05_eyesmiddle.jpg	MF	fear	no	middle	yes	1	312	m	m	67	7	60
Exp V1 Meye Znoeye	15	25	female	Finished stimuli\MO\Fear\mo_fear_Face01_noeyesmiddle.jpg	MO	fear	no	middle	no	1	214	z	z	67	7	60
Exp V1 Meye Znoeye	15	25	female	Finished stimuli\nrR\Neutral\nrr_neutral_Face02_eyesbottom.jpg	nr	neutral	no	bottom	yes	1	390	m	m	66	6	60
Exp V1 Meye Znoeye	15	25	female	Finished stimuli\PF\Neutral\pf_neutral_Face03_eyesbottom.jpg	PF	neutral	no	bottom	yes	0	340	m	z	66	6	60
Exp V1 Meye Znoeye	15	25	female	Finished stimuli\nrR\Fear\nrr_fear_Face02_noeyesbottom.jpg	nr	fear	no	bottom	no	1	215	z	z	67	7	60
Exp V1 Meye Znoeye	15	25	female	Finished stimuli\JJ\Neutral\jj_neutral_Face04_noeyes.jpg	JJ	neutral	yes	nm	no	1	315	z	z	67	7	60
Exp V1 Meye Znoeye	15	25	female	Finished stimuli\PF\Neutral\pf_neutral_Face03_noeyestop.jpg	PF	neutral	no	top	no	1	288	z	z	67	7	60
Exp V1 Meye Znoeye	15	25	female	Finished stimuli\JJ\Neutral\jj_neutral_Face04_eyesbottom.jpg	JJ	neutral	no	bottom	yes	1	593	m	m	66	6	60
Exp V1 Meye Znoeye	15	25	female	Finished stimuli\PE\Fear\pe_fear_Face08_eyes.jpg	PE	fear	yes	nm	yes	1	295	m	m	66	6	60
Exp V1 Meye Znoeye	15	25	female	Finished stimuli\WF\Fear\wf_fear_Face10_eyes.jpg	WF	fear	yes	nm	yes	1	258	m	m	67	7	60
Exp V1 Meye Znoeye	15	25	female	Finished stimuli\nrR\Neutral\nrr_neutral_Face02_eyestop.jpg	nr	neutral	no	top	yes	1	366	m	m	66	6	60
Exp V1 Meye Znoeye	15	25	female	Finished stimuli\PF\Fear\pf_fear_Face03_noeyes.jpg	PF	fear	yes	nm	no	1	287	z	z	67	7	60
Exp V1 Meye Znoeye	15	25	female	Finished stimuli\WF\Neutral\wf_neutral_Face10_eyestop.jpg	WF	neutral	no	top	yes	1	375	m	m	66	6	60
Exp V1 Meye Znoeye	15	25	female	Finished stimuli\MF\Fear\mf_fear_Face05_eyesbottom.jpg	MF	fear	no	bottom	yes	0	824	m	z	67	7	60
Exp V1 Meye Znoeye	15	25	female	Finished stimuli\MF\Neutral\mf_neutral_Face05_noeyesbottom.jpg	MF	neutral	no	bottom	no	1	154	z	z	66	6	60
Exp V1 Meye Znoeye	15	25	female	Finished stimuli\PE\Neutral\pe_neutral_Face08_noeyes.jpg	PE	neutral	yes	nm	no	1	328	z	z	66	6	60
Exp V1 Meye Znoeye	15	25	female	Finished stimuli\WF\Neutral\wf_neutral_Face10_noeyesbottom.jpg	WF	neutral	no	bottom	no	1	329	z	z	67	7	60
Exp V1 Meye Znoeye	15	25	female	Finished stimuli\PF\Neutral\pf_neutral_Face03_noeyesmiddle.jpg	PF	neutral	no	middle	no	1	209	z	z	66	6	60
Exp V1 Meye Znoeye	15	25	female	Finished stimuli\nrR\Fear\nrr_fear_Face02_noeyes.jpg	nr	fear	yes	nm	no	1	290	z	z	67	7	60
Exp V1 Meye Znoeye	15	25	female	Finished stimuli\JJ\Fear\jj_fear_Face04_noeyesmiddle.jpg	JJ	fear	no	middle	no	1	162	z	z	67	7	60
Exp V1 Meye Znoeye	15	25	female	Finished stimuli\MF\Fear\mf_fear_Face05_eyesmiddle.jpg	MF	fear	no	middle	yes	0	251	m	z	67	7	60
Exp V1 Meye Znoeye	15	25	female	Finished stimuli\MF\Fear\mf_fear_Face05_noeyes.jpg	MF	fear	yes	nm	no	1	19	z	z	67	7	60
Exp V1 Meye Znoeye	15	25	female	Finished stimuli\JJ\Fear\jj_fear_Face04_noeyestop.jpg	JJ	fear	no	top	no	1	70	z	z	67	7	60
Exp V1 Meye Znoeye	15	25	female	Finished stimuli\SW\Fear\sw_fear_Face06_eyes.jpg	SW	fear	yes	nm	yes	0	108	m	z	66	6	60
Exp V1 Meye Znoeye	15	25	female	Finished stimuli\nrR\Neutral\nrr_neutral_Face02_noeyestop.jpg	nr	neutral	no	top	no	1	7	z	z	67	7	60
Exp V1 Meye Znoeye	15	25	female	Finished stimuli\MO\Neutral\mo_neutral_Face01_eyesbottom.jpg	MO	neutral	no	bottom	yes	0	72	m	z	67	7	60
Exp V1 Meye Znoeye	15	25	female	Finished stimuli\JJ\Fear\jj_fear_Face04_noeyes.jpg	JJ	fear	yes	nm	no	1	390	z	z	67	7	60
Exp V1 Meye Znoeye	15	25	female	Finished stimuli\MO\Fear\mo_fear_Face01_noeyesbottom.jpg	MO	fear	no	bottom	no	1	115	z	z	67	7	60
Exp V1 Meye Znoeye	15	25	female	Finished stimuli\MO\Fear\mo_fear_Face01_eyestop.jpg	MO	fear	no	top	yes	0	97	m	z	67	7	60
Exp V1 Meye Znoeye	15	25	female	Finished stimuli\nrR\Neutral\nrr_neutral_Face02_eyesbottom.jpg	nr	neutral	no	bottom	yes	0	132	m	z	67	7	60
Exp V1 Meye Znoeye	15	25	female	Finished stimuli\nrR\Fear\nrr_fear_Face02_eyestop.jpg	nr	fear	no	top	yes	1	37	m	m	66	6	60
Exp V1 Meye Znoeye	15	25	female	Finished stimuli\WF\Fear\wf_fear_Face10_noeyesmiddle.jpg	WF	fear	no	middle	no	0	35	z	m	67	7	60
Exp V1 Meye Znoeye	15	25	female	Finished stimuli\JJ\Neutral\jj_neutral_Face04_eyesbottom.jpg	JJ	neutral	no	bottom	yes	1	32	m	m	67	7	60
Exp V1 Meye Znoeye	15	25	female	Finished stimuli\MO\Neutral\mo_neutral_Face01_eyestop.jpg	MO	neutral	no	top	yes	1	302	m	m	66	6	60
Exp V1 Meye Znoeye	15	25	female	Finished stimuli\PE\Neutral\pe_neutral_Face08_eyesbottom.jpg	PE	neutral	no	bottom	yes	1	337	m	m	67	7	60
Exp V1 Meye Znoeye	15	25	female	Finished stimuli\nrR\Fear\nrr_fear_Face02_eyesbottom.jpg	nr	fear	no	bottom	yes	1	333	m	m	67	7	60
Exp V1 Meye Znoeye	15	25	female	Finished stimuli\MO\Neutral\mo_neutral_Face01_noeyesbottom.jpg	MO	neutral	no	bottom	no	1	436	z	z	67	7	60
Exp V1 Meye Znoeye	15	25	female	Finished stimuli\SW\Fear\sw_fear_Face06_noeyestop.jpg	SW	fear	no	top	no	1	194	z	z	67	7	60
Exp V1 Meye Znoeye	15	25	female	Finished stimuli\WF\Fear\wf_fear_Face10_noeyes.jpg	WF	fear	yes	nm	no	1	288	z	z	66	6	60
Exp V1 Meye Znoeye	15	25	female	Finished stimuli\PE\Neutral\pe_neutral_Face08_noeyesmiddle.jpg	PE	neutral	no	middle	no	1	201	z	z	67	7	60
Exp V1 Meye Znoeye	15	25	female	Finished stimuli\PE\Fear\pe_fear_Face08_eyes.jpg	PE	fear	yes	nm	yes	1	239	m	m	67	7	60
Exp V1 Meye Znoeye	15	25	female	Finished stimuli\WF\Fear\wf_fear_Face10_eyes.jpg	WF	fear	yes	nm	yes	1	260	m	m	67	7	60
Exp V1 Meye Znoeye	15	25	female	Finished stimuli\JJ\Fear\jj_fear_Face04_eyes.jpg	JJ	fear	yes	nm	yes	1	224	m	m	67	7	60
Exp V1 Meye Znoeye	15	25	female	Finished stimuli\WF\Neutral\wf_neutral_Face10_eyesbottom.jpg	WF	neutral	no	bottom	yes	1	555	m	m	67	7	60
Exp V1 Meye Znoeye	15	25	female	Finished stimuli\JJ\Neutral\jj_neutral_Face04_eyes.jpg	JJ	neutral	yes	nm	yes	1	401	m	m	67	7	60
Exp V1 Meye Znoeye	15	25	female	Finished stimuli\WF\Neutral\wf_neutral_Face10_noeyes.jpg	WF	neutral	yes	nm	no	1	327	z	z	67	7	60
Exp V1 Meye Znoeye	15	25	female	Finished stimuli\nrR\Neutral\nrr_neutral_Face02_eyes.jpg	nr	neutral	yes	nm	yes	0	199	m	z	67	7	60
Exp V1 Meye Znoeye	15	25	female	Finished stimuli\MO\Neutral\mo_neutral_Face01_eyesmiddle.jpg	MO	neutral	no	middle	yes	1	261	m	m	66	6	60
Exp V1 Meye Znoeye	15	25	female	Finished stimuli\SW\Neutral\sw_neutral_Face06_eyes.jpg	SW	neutral	yes	nm	yes	1	232	m	m	67	7	60
Exp V1 Meye Znoeye	15	25	female	Finished stimuli\SW\Fear\sw_fear_Face06_noeyesbottom.jpg	SW	fear	no	bottom	no	1	342	z	z	66	6	60
Exp V1 Meye Znoeye	15	25	female	Finished stimuli\nrR\Fear\nrr_fear_Face02_noeyestop.jpg	nr	fear	no	top	no	1	185	z	z	67	7	60
Exp V1 Meye Znoeye	15	25	female	Finished stimuli\MF\Fear\mf_fear_Face05_noeyestop.jpg	MF	fear	no	top	no	1	141	z	z	67	7	60
Exp V1 Meye Znoeye	15	25	female	Finished stimuli\SW\Neutral\sw_neutral_Face06_eyestop.jpg	SW	neutral	no	top	yes	1	288	m	m	67	7	60
Exp V1 Meye Znoeye	15	25	female	Finished stimuli\nrR\Neutral\nrr_neutral_Face02_eyesmiddle.jpg	nr	neutral	no	middle	yes	1	248	m	m	67	7	60
Exp V1 Meye Znoeye	15	25	female	Finished stimuli\MF\Fear\mf_fear_Face05_eyestop.jpg	MF	fear	no	top	yes	1	185	m	m	66	6	60
Exp V1 Meye Znoeye	15	25	female	Finished stimuli\SW\Neutral\sw_neutral_Face06_eyesbottom.jpg	SW	neutral	no	bottom	yes	1	172	m	m	66	6	60
Exp V1 Meye Znoeye	15	25	female	Finished stimuli\WF\Fear\wf_fear_Face10_eyesbottom.jpg	WF	fear	no	bottom	yes	1	285	m	m	67	7	60
Exp V1 Meye Znoeye	15	25	female	Finished stimuli\MF\Neutral\mf_neutral_Face05_noeyestop.jpg	MF	neutral	no	top	no	0	148	z	m	66	6	60
Exp V1 Meye Znoeye	15	25	female	Finished stimuli\MO\Neutral\mo_neutral_Face01_noeyestop.jpg	MO	neutral	no	top	no	1	410	z	z	66	6	60
Exp V1 Meye Znoeye	15	25	female	Finished stimuli\SW\Fear\sw_fear_Face06_noeyes.jpg	SW	fear	yes	nm	no	1	211	z	z	67	7	60
Exp V1 Meye Znoeye	15	25	female	Finished stimuli\nrR\Fear\nrr_fear_Face02_noeyesmiddle.jpg	nr	fear	no	middle	no	1	187	z	z	66	6	60
Exp V1 Meye Znoeye	15	25	female	Finished stimuli\PF\Fear\pf_fear_Face03_eyes.jpg	PF	fear	yes	nm	yes	1	262	m	m	67	7	60
Exp V1 Meye Znoeye	15	25	female	Finished stimuli\PF\Neutral\pf_neutral_Face03_eyes.jpg	PF	neutral	yes	nm	yes	1	210	m	m	67	7	60
Exp V1 Meye Znoeye	15	25	female	Finished stimuli\JJ\Fear\jj_fear_Face04_noeyesbottom.jpg	JJ	fear	no	bottom	no	1	418	z	z	66	6	60
Exp V1 Meye Znoeye	15	25	female	Finished stimuli\PE\Neutral\pe_neutral_Face08_noeyesbottom.jpg	PE	neutral	no	bottom	no	1	221	z	z	67	7	60
Exp V1 Meye Znoeye	15	25	female	Finished stimuli\JJ\Neutral\jj_neutral_Face04_noeyesmiddle.jpg	JJ	neutral	no	middle	no	1	225	z	z	67	7	60
Exp V1 Meye Znoeye	15	25	female	Finished stimuli\MF\Neutral\mf_neutral_Face05_eyes.jpg	MF	neutral	yes	nm	yes	1	340	m	m	67	7	60
Exp V1 Meye Znoeye	15	25	female	Finished stimuli\nrR\Neutral\nrr_neutral_Face02_noeyes.jpg	nr	neutral	yes	nm	no	0	583	z	m	66	6	60
Exp V1 Meye Znoeye	15	25	female	Finished stimuli\PE\Fear\pe_fear_Face08_noeyesbottom.jpg	PE	fear	no	bottom	no	0	162	z	m	67	7	60
Exp V1 Meye Znoeye	15	25	female	Finished stimuli\PE\Fear\pe_fear_Face08_noeyesmiddle.jpg	PE	fear	no	middle	no	0	259	z	m	67	7	60
Exp V1 Meye Znoeye	15	25	female	Finished stimuli\MF\Neutral\mf_neutral_Face05_noeyes.jpg	MF	neutral	yes	nm	no	1	302	z	z	66	6	60
Exp V1 Meye Znoeye	15	25	female	Finished stimuli\JJ\Neutral\jj_neutral_Face04_noeyestop.jpg	JJ	neutral	no	top	no	1	217	z	z	66	6	60
Exp V1 Meye Znoeye	15	25	female	Finished stimuli\MF\Neutral\mf_neutral_Face05_eyestop.jpg	MF	neutral	no	top	yes	0	484	m	z	67	7	60
Exp V1 Meye Znoeye	15	25	female	Finished stimuli\PE\Neutral\pe_neutral_Face08_eyesmiddle.jpg	PE	neutral	no	middle	yes	1	413	m	m	66	6	60
Exp V1 Meye Znoeye	15	25	female	Finished stimuli\WF\Neutral\wf_neutral_Face10_eyesmiddle.jpg	WF	neutral	no	middle	yes	1	486	m	m	67	7	60
Exp V1 Meye Znoeye	15	25	female	Finished stimuli\PF\Neutral\pf_neutral_Face03_eyestop.jpg	PF	neutral	no	top	yes	1	550	m	m	67	7	60
Exp V1 Meye Znoeye	15	25	female	Finished stimuli\JJ\Neutral\jj_neutral_Face04_eyesmiddle.jpg	JJ	neutral	no	middle	yes	1	1651	m	m	67	7	60
Exp V1 Meye Znoeye	15	25	female	Finished stimuli\MO\Fear\mo_fear_Face01_eyesmiddle.jpg	MO	fear	no	middle	yes	1	837	m	m	67	7	60
Exp V1 Meye Znoeye	15	25	female	Finished stimuli\PE\Fear\pe_fear_Face08_eyesbottom.jpg	PE	fear	no	bottom	yes	1	267	m	m	67	7	60
Exp V1 Meye Znoeye	15	25	female	Finished stimuli\SW\Fear\sw_fear_Face06_eyestop.jpg	SW	fear	no	top	yes	1	406	m	m	66	6	60
Exp V1 Meye Znoeye	15	25	female	Finished stimuli\PF\Neutral\pf_neutral_Face03_noeyesbottom.jpg	PF	neutral	no	bottom	no	1	447	z	z	67	7	60
Exp V1 Meye Znoeye	15	25	female	Finished stimuli\WF\Neutral\wf_neutral_Face10_noeyestop.jpg	WF	neutral	no	top	no	1	591	z	z	66	6	60
Exp V1 Meye Znoeye	15	25	female	Finished stimuli\PF\Fear\pf_fear_Face03_noeyestop.jpg	PF	fear	no	top	no	1	285	z	z	67	7	60
Exp V1 Meye Znoeye	15	25	female	Finished stimuli\WF\Fear\wf_fear_Face10_eyesmiddle.jpg	WF	fear	no	middle	yes	1	686	m	m	67	7	60
Exp V1 Meye Znoeye	15	25	female	Finished stimuli\PF\Neutral\pf_neutral_Face03_eyesmiddle.jpg	PF	neutral	no	middle	yes	1	511	m	m	67	7	60
Exp V1 Meye Znoeye	15	25	female	Finished stimuli\nrR\Fear\nrr_fear_Face02_eyes.jpg	nr	fear	yes	nm	yes	1	909	m	m	67	7	60
Exp V1 Meye Znoeye	15	25	female	Finished stimuli\SW\Neutral\sw_neutral_Face06_noeyesmiddle.jpg	SW	neutral	no	middle	no	1	755	z	z	67	7	60
Exp V1 Meye Znoeye	15	25	female	Finished stimuli\PF\Neutral\pf_neutral_Face03_noeyes.jpg	PF	neutral	yes	nm	no	0	1329	z	m	66	6	60
Exp V1 Meye Znoeye	15	25	female	Finished stimuli\PF\Fear\pf_fear_Face03_eyesbottom.jpg	PF	fear	no	bottom	yes	1	370	m	m	66	6	60
Exp V1 Meye Znoeye	15	25	female	Finished stimuli\PE\Fear\pe_fear_Face08_noeyestop.jpg	PE	fear	no	top	no	1	307	z	z	67	7	60
Exp V1 Meye Znoeye	15	25	female	Finished stimuli\SW\Neutral\sw_neutral_Face06_noeyes.jpg	SW	neutral	yes	nm	no	1	286	z	z	67	7	60
Exp V1 Meye Znoeye	15	25	female	Finished stimuli\nrR\Neutral\nrr_neutral_Face02_noeyesmiddle.jpg	nr	neutral	no	middle	no	1	245	z	z	67	7	60
Exp V1 Meye Znoeye	15	25	female	Finished stimuli\SW\Neutral\sw_neutral_Face06_noeyestop.jpg	SW	neutral	no	top	no	1	230	z	z	67	7	60
Exp V1 Meye Znoeye	15	25	female	Finished stimuli\SW\Neutral\sw_neutral_Face06_eyesmiddle.jpg	SW	neutral	no	middle	yes	1	308	m	m	67	7	60
Exp V1 Meye Znoeye	15	25	female	Finished stimuli\PF\Fear\pf_fear_Face03_eyestop.jpg	PF	fear	no	top	yes	1	575	m	m	66	6	60
Exp V1 Meye Znoeye	15	25	female	Finished stimuli\JJ\Fear\jj_fear_Face04_eyesmiddle.jpg	JJ	fear	no	middle	yes	1	402	m	m	67	7	60
Exp V1 Meye Znoeye	15	25	female	Finished stimuli\JJ\Neutral\jj_neutral_Face04_eyestop.jpg	JJ	neutral	no	top	yes	1	243	m	m	66	6	60
Exp V1 Meye Znoeye	15	25	female	Finished stimuli\PF\Fear\pf_fear_Face03_noeyesbottom.jpg	PF	fear	no	bottom	no	1	411	z	z	67	7	60
Exp V1 Meye Znoeye	15	25	female	Finished stimuli\MF\Neutral\mf_neutral_Face05_eyesmiddle.jpg	MF	neutral	no	middle	yes	1	340	m	m	66	6	60
Exp V1 Meye Znoeye	15	25	female	Finished stimuli\MO\Fear\mo_fear_Face01_noeyesmiddle.jpg	MO	fear	no	middle	no	0	207	z	m	67	7	60
Exp V1 Meye Znoeye	15	25	female	Finished stimuli\MO\Neutral\mo_neutral_Face01_noeyesmiddle.jpg	MO	neutral	no	middle	no	0	224	z	m	67	7	60
Exp V1 Meye Znoeye	15	25	female	Finished stimuli\JJ\Neutral\jj_neutral_Face04_noeyes.jpg	JJ	neutral	yes	nm	no	1	299	z	z	66	6	60
Exp V1 Meye Znoeye	15	25	female	Finished stimuli\PE\Neutral\pe_neutral_Face08_eyestop.jpg	PE	neutral	no	top	yes	1	462	m	m	67	7	60
Exp V1 Meye Znoeye	15	25	female	Finished stimuli\MO\Neutral\mo_neutral_Face01_eyes.jpg	MO	neutral	yes	nm	yes	0	418	m	z	67	7	60
Exp V1 Meye Znoeye	15	25	female	Finished stimuli\SW\Fear\sw_fear_Face06_noeyesmiddle.jpg	SW	fear	no	middle	no	1	565	z	z	66	6	60
Exp V1 Meye Znoeye	15	25	female	Finished stimuli\nrR\Neutral\nrr_neutral_Face02_noeyesbottom.jpg	nr	neutral	no	bottom	no	1	454	z	z	67	7	60
Exp V1 Meye Znoeye	15	25	female	Finished stimuli\MF\Fear\mf_fear_Face05_eyes.jpg	MF	fear	yes	nm	yes	0	542	m	z	66	6	60
Exp V1 Meye Znoeye	15	25	female	Finished stimuli\MO\Fear\mo_fear_Face01_eyesbottom.jpg	MO	fear	no	bottom	yes	1	258	m	m	67	7	60
Exp V1 Meye Znoeye	15	25	female	Finished stimuli\WF\Fear\wf_fear_Face10_noeyesbottom.jpg	WF	fear	no	bottom	no	1	421	z	z	67	7	60
Exp V1 Meye Znoeye	15	25	female	Finished stimuli\MF\Neutral\mf_neutral_Face05_noeyesmiddle.jpg	MF	neutral	no	middle	no	0	400	z	m	66	6	60
Exp V1 Meye Znoeye	15	25	female	Finished stimuli\MF\Neutral\mf_neutral_Face05_eyesbottom.jpg	MF	neutral	no	bottom	yes	0	269	m	z	66	6	60
Exp V1 Meye Znoeye	15	25	female	Finished stimuli\MO\Fear\mo_fear_Face01_noeyestop.jpg	MO	fear	no	top	no	1	243	z	z	66	6	60
Exp V1 Meye Znoeye	15	25	female	Finished stimuli\MO\Fear\mo_fear_Face01_eyes.jpg	MO	fear	yes	nm	yes	1	435	m	m	67	7	60
Exp V1 Meye Znoeye	15	25	female	Finished stimuli\PE\Fear\pe_fear_Face08_eyesmiddle.jpg	PE	fear	no	middle	yes	1	241	m	m	67	7	60
Exp V1 Meye Znoeye	15	25	female	Finished stimuli\MO\Neutral\mo_neutral_Face01_noeyes.jpg	MO	neutral	yes	nm	no	1	282	z	z	66	6	60
Exp V1 Meye Znoeye	15	25	female	Finished stimuli\WF\Neutral\wf_neutral_Face10_eyes.jpg	WF	neutral	yes	nm	yes	1	331	m	m	67	7	60
Exp V1 Meye Znoeye	15	25	female	Finished stimuli\SW\Neutral\sw_neutral_Face06_noeyesbottom.jpg	SW	neutral	no	bottom	no	1	219	z	z	66	6	60
Exp V1 Meye Znoeye	15	25	female	Finished stimuli\MO\Fear\mo_fear_Face01_noeyes.jpg	MO	fear	yes	nm	no	1	198	z	z	67	7	60
Exp V1 Meye Znoeye	15	25	female	Finished stimuli\WF\Neutral\wf_neutral_Face10_noeyesmiddle.jpg	WF	neutral	no	middle	no	1	188	z	z	66	6	60
Exp V1 Meye Znoeye	15	25	female	Finished stimuli\SW\Fear\sw_fear_Face06_eyesbottom.jpg	SW	fear	no	bottom	yes	0	295	m	z	67	7	60
Exp V1 Meye Znoeye	15	25	female	Finished stimuli\WF\Fear\wf_fear_Face10_noeyestop.jpg	WF	fear	no	top	no	0	187	z	m	67	7	60
Exp V1 Meye Znoeye	15	25	female	Finished stimuli\PE\Fear\pe_fear_Face08_eyestop.jpg	PE	fear	no	top	yes	0	230	m	z	67	7	60
Exp V1 Meye Znoeye	15	25	female	Finished stimuli\PE\Neutral\pe_neutral_Face08_noeyestop.jpg	PE	neutral	no	top	no	1	356	z	z	67	7	60
Exp V1 Meye Znoeye	15	25	female	Finished stimuli\PE\Neutral\pe_neutral_Face08_eyes.jpg	PE	neutral	yes	nm	yes	0	233	m	z	67	7	60
Exp V1 Meye Znoeye	15	25	female	Finished stimuli\WF\Fear\wf_fear_Face10_eyestop.jpg	WF	fear	no	top	yes	1	231	m	m	67	7	60
Exp V1 Meye Znoeye	15	25	female	Finished stimuli\nrR\Fear\nrr_fear_Face02_eyesmiddle.jpg	nr	fear	no	middle	yes	1	245	m	m	66	6	60
Exp V1 Meye Znoeye	15	25	female	Finished stimuli\JJ\Fear\jj_fear_Face04_eyestop.jpg	JJ	fear	no	top	yes	1	158	m	m	67	7	60
Exp V1 Meye Znoeye	15	25	female	Finished stimuli\PF\Fear\pf_fear_Face03_noeyesmiddle.jpg	PF	fear	no	middle	no	0	204	z	m	67	7	60
Exp V1 Meye Znoeye	15	25	female	Finished stimuli\JJ\Neutral\jj_neutral_Face04_noeyesbottom.jpg	JJ	neutral	no	bottom	no	0	444	z	m	66	6	60
Exp V1 Meye Znoeye	15	25	female	Finished stimuli\PF\Fear\pf_fear_Face03_eyesmiddle.jpg	PF	fear	no	middle	yes	0	325	m	z	67	7	60
Exp V1 Meye Znoeye	15	25	female	Finished stimuli\MF\Fear\mf_fear_Face05_noeyesbottom.jpg	MF	fear	no	bottom	no	1	548	z	z	67	7	60
Exp V1 Meye Znoeye	15	25	female	Finished stimuli\PE\Fear\pe_fear_Face08_noeyes.jpg	PE	fear	yes	nm	no	1	490	z	z	67	7	60
Exp V1 Meye Znoeye	15	25	female	Finished stimuli\JJ\Fear\jj_fear_Face04_eyesbottom.jpg	JJ	fear	no	bottom	yes	1	315	m	m	66	6	60
Exp V1 Meye Znoeye	15	25	female	Finished stimuli\PF\Neutral\pf_neutral_Face03_noeyestop.jpg	PF	neutral	no	top	no	1	457	z	z	66	6	60
Exp V1 Meye Znoeye	15	25	female	Finished stimuli\MF\Fear\mf_fear_Face05_noeyesmiddle.jpg	MF	fear	no	middle	no	1	212	z	z	66	6	60
Exp V1 Meye Znoeye	15	25	female	Finished stimuli\nrR\Fear\nrr_fear_Face02_noeyesbottom.jpg	nr	fear	no	bottom	no	1	581	z	z	67	7	60
Exp V1 Meye Znoeye	15	25	female	Finished stimuli\SW\Fear\sw_fear_Face06_eyesmiddle.jpg	SW	fear	no	middle	yes	1	456	m	m	66	6	60
Exp V1 Meye Znoeye	15	25	female	Finished stimuli\PF\Neutral\pf_neutral_Face03_eyesbottom.jpg	PF	neutral	no	bottom	yes	1	395	m	m	67	7	60
Exp V1 Meye Znoeye	15	25	female	Finished stimuli\JJ\Neutral\jj_neutral_Face04_noeyesmiddle.jpg	JJ	neutral	no	middle	no	1	338	z	z	66	6	60
Exp V1 Meye Znoeye	15	25	female	Finished stimuli\JJ\Fear\jj_fear_Face04_eyes.jpg	JJ	fear	yes	nm	yes	0	349	m	z	66	6	60
Exp V1 Meye Znoeye	15	25	female	Finished stimuli\nrR\Neutral\nrr_neutral_Face02_noeyesbottom.jpg	nr	neutral	no	bottom	no	1	275	z	z	66	6	60
Exp V1 Meye Znoeye	15	25	female	Finished stimuli\WF\Neutral\wf_neutral_Face10_noeyesbottom.jpg	WF	neutral	no	bottom	no	1	281	z	z	66	6	60
Exp V1 Meye Znoeye	15	25	female	Finished stimuli\PE\Neutral\pe_neutral_Face08_noeyes.jpg	PE	neutral	yes	nm	no	1	247	z	z	66	6	60
Exp V1 Meye Znoeye	15	25	female	Finished stimuli\JJ\Neutral\jj_neutral_Face04_eyestop.jpg	JJ	neutral	no	top	yes	1	319	m	m	67	7	60
Exp V1 Meye Znoeye	15	25	female	Finished stimuli\MF\Neutral\mf_neutral_Face05_eyestop.jpg	MF	neutral	no	top	yes	1	317	m	m	67	7	60
Exp V1 Meye Znoeye	15	25	female	Finished stimuli\SW\Neutral\sw_neutral_Face06_noeyesmiddle.jpg	SW	neutral	no	middle	no	0	579	z	m	67	7	60
Exp V1 Meye Znoeye	15	25	female	Finished stimuli\PF\Neutral\pf_neutral_Face03_noeyesbottom.jpg	PF	neutral	no	bottom	no	1	431	z	z	67	7	60
Exp V1 Meye Znoeye	15	25	female	Finished stimuli\nrR\Fear\nrr_fear_Face02_noeyesmiddle.jpg	nr	fear	no	middle	no	0	693	z	m	67	7	60
Exp V1 Meye Znoeye	15	25	female	Finished stimuli\JJ\Fear\jj_fear_Face04_eyesmiddle.jpg	JJ	fear	no	middle	yes	1	268	m	m	67	7	60
Exp V1 Meye Znoeye	15	25	female	Finished stimuli\PF\Neutral\pf_neutral_Face03_eyes.jpg	PF	neutral	yes	nm	yes	1	514	m	m	67	7	60
Exp V1 Meye Znoeye	15	25	female	Finished stimuli\MF\Fear\mf_fear_Face05_eyesmiddle.jpg	MF	fear	no	middle	yes	1	256	m	m	67	7	60
Exp V1 Meye Znoeye	15	25	female	Finished stimuli\SW\Neutral\sw_neutral_Face06_noeyesbottom.jpg	SW	neutral	no	bottom	no	0	827	z	m	67	7	60
Exp V1 Meye Znoeye	15	25	female	Finished stimuli\nrR\Fear\nrr_fear_Face02_noeyestop.jpg	nr	fear	no	top	no	0	1415	z	m	66	6	60
Exp V1 Meye Znoeye	15	25	female	Finished stimuli\MO\Neutral\mo_neutral_Face01_eyestop.jpg	MO	neutral	no	top	yes	1	283	m	m	67	7	60
Exp V1 Meye Znoeye	15	25	female	Finished stimuli\WF\Neutral\wf_neutral_Face10_eyestop.jpg	WF	neutral	no	top	yes	0	2043	m	z	67	7	60
Exp V1 Meye Znoeye	15	25	female	Finished stimuli\JJ\Fear\jj_fear_Face04_eyestop.jpg	JJ	fear	no	top	yes	1	1125	m	m	67	7	60
Exp V1 Meye Znoeye	15	25	female	Finished stimuli\PE\Neutral\pe_neutral_Face08_eyestop.jpg	PE	neutral	no	top	yes	1	366	m	m	67	7	60
Exp V1 Meye Znoeye	15	25	female	Finished stimuli\WF\Fear\wf_fear_Face10_noeyesmiddle.jpg	WF	fear	no	middle	no	1	766	z	z	66	6	60
Exp V1 Meye Znoeye	15	25	female	Finished stimuli\MF\Fear\mf_fear_Face05_noeyesmiddle.jpg	MF	fear	no	middle	no	1	271	z	z	66	6	60
Exp V1 Meye Znoeye	15	25	female	Finished stimuli\JJ\Fear\jj_fear_Face04_noeyestop.jpg	JJ	fear	no	top	no	1	341	z	z	66	6	60
Exp V1 Meye Znoeye	15	25	female	Finished stimuli\WF\Neutral\wf_neutral_Face10_eyes.jpg	WF	neutral	yes	nm	yes	1	416	m	m	66	6	60
Exp V1 Meye Znoeye	15	25	female	Finished stimuli\WF\Neutral\wf_neutral_Face10_noeyestop.jpg	WF	neutral	no	top	no	1	235	z	z	67	7	60
Exp V1 Meye Znoeye	15	25	female	Finished stimuli\MF\Neutral\mf_neutral_Face05_eyesmiddle.jpg	MF	neutral	no	middle	yes	1	408	m	m	67	7	60
Exp V1 Meye Znoeye	15	25	female	Finished stimuli\WF\Fear\wf_fear_Face10_noeyes.jpg	WF	fear	yes	nm	no	0	209	z	m	66	6	60
Exp V1 Meye Znoeye	15	25	female	Finished stimuli\MF\Neutral\mf_neutral_Face05_noeyes.jpg	MF	neutral	yes	nm	no	0	201	z	m	67	7	60
Exp V1 Meye Znoeye	15	25	female	Finished stimuli\PF\Fear\pf_fear_Face03_eyestop.jpg	PF	fear	no	top	yes	1	362	m	m	66	6	60
Exp V1 Meye Znoeye	15	25	female	Finished stimuli\nrR\Neutral\nrr_neutral_Face02_eyesmiddle.jpg	nr	neutral	no	middle	yes	1	291	m	m	67	7	60
Exp V1 Meye Znoeye	15	25	female	Finished stimuli\PF\Neutral\pf_neutral_Face03_eyesmiddle.jpg	PF	neutral	no	middle	yes	1	195	m	m	66	6	60
Exp V1 Meye Znoeye	15	25	female	Finished stimuli\MF\Fear\mf_fear_Face05_eyes.jpg	MF	fear	yes	nm	yes	1	273	m	m	66	6	60
Exp V1 Meye Znoeye	15	25	female	Finished stimuli\SW\Neutral\sw_neutral_Face06_eyes.jpg	SW	neutral	yes	nm	yes	1	271	m	m	67	7	60
Exp V1 Meye Znoeye	15	25	female	Finished stimuli\WF\Neutral\wf_neutral_Face10_noeyesmiddle.jpg	WF	neutral	no	middle	no	1	1389	z	z	67	7	60
Exp V1 Meye Znoeye	15	25	female	Finished stimuli\MO\Neutral\mo_neutral_Face01_eyes.jpg	MO	neutral	yes	nm	yes	1	387	m	m	66	6	60
Exp V1 Meye Znoeye	15	25	female	Finished stimuli\WF\Fear\wf_fear_Face10_eyesmiddle.jpg	WF	fear	no	middle	yes	1	406	m	m	67	7	60
Exp V1 Meye Znoeye	15	25	female	Finished stimuli\SW\Fear\sw_fear_Face06_eyes.jpg	SW	fear	yes	nm	yes	1	263	m	m	66	6	60
Exp V1 Meye Znoeye	15	25	female	Finished stimuli\WF\Neutral\wf_neutral_Face10_noeyes.jpg	WF	neutral	yes	nm	no	1	410	z	z	67	7	60
Exp V1 Meye Znoeye	15	25	female	Finished stimuli\PF\Fear\pf_fear_Face03_eyesbottom.jpg	PF	fear	no	bottom	yes	1	731	m	m	66	6	60
Exp V1 Meye Znoeye	15	25	female	Finished stimuli\MO\Fear\mo_fear_Face01_noeyesmiddle.jpg	MO	fear	no	middle	no	1	388	z	z	67	7	60
Exp V1 Meye Znoeye	15	25	female	Finished stimuli\MF\Neutral\mf_neutral_Face05_noeyesbottom.jpg	MF	neutral	no	bottom	no	1	615	z	z	66	6	60
Exp V1 Meye Znoeye	15	25	female	Finished stimuli\SW\Neutral\sw_neutral_Face06_eyestop.jpg	SW	neutral	no	top	yes	1	320	m	m	67	7	60
Exp V1 Meye Znoeye	15	25	female	Finished stimuli\MF\Fear\mf_fear_Face05_eyesbottom.jpg	MF	fear	no	bottom	yes	1	542	m	m	67	7	60
Exp V1 Meye Znoeye	15	25	female	Finished stimuli\PE\Fear\pe_fear_Face08_noeyes.jpg	PE	fear	yes	nm	no	1	385	z	z	66	6	60
Exp V1 Meye Znoeye	15	25	female	Finished stimuli\MO\Neutral\mo_neutral_Face01_noeyesmiddle.jpg	MO	neutral	no	middle	no	1	339	z	z	66	6	60
Exp V1 Meye Znoeye	15	25	female	Finished stimuli\MO\Fear\mo_fear_Face01_noeyesbottom.jpg	MO	fear	no	bottom	no	1	350	z	z	67	7	60
Exp V1 Meye Znoeye	15	25	female	Finished stimuli\PE\Fear\pe_fear_Face08_eyesbottom.jpg	PE	fear	no	bottom	yes	1	324	m	m	67	7	60
Exp V1 Meye Znoeye	15	25	female	Finished stimuli\MF\Fear\mf_fear_Face05_eyestop.jpg	MF	fear	no	top	yes	0	253	m	z	66	6	60
Exp V1 Meye Znoeye	15	25	female	Finished stimuli\WF\Neutral\wf_neutral_Face10_eyesbottom.jpg	WF	neutral	no	bottom	yes	1	997	m	m	67	7	60
Exp V1 Meye Znoeye	15	25	female	Finished stimuli\SW\Fear\sw_fear_Face06_noeyestop.jpg	SW	fear	no	top	no	1	340	z	z	67	7	60
Exp V1 Meye Znoeye	15	25	female	Finished stimuli\PE\Fear\pe_fear_Face08_eyes.jpg	PE	fear	yes	nm	yes	0	295	m	z	66	6	60
Exp V1 Meye Znoeye	15	25	female	Finished stimuli\WF\Fear\wf_fear_Face10_eyestop.jpg	WF	fear	no	top	yes	1	258	m	m	66	6	60
Exp V1 Meye Znoeye	15	25	female	Finished stimuli\PE\Neutral\pe_neutral_Face08_noeyesmiddle.jpg	PE	neutral	no	middle	no	1	293	z	z	67	7	60
Exp V1 Meye Znoeye	15	25	female	Finished stimuli\MF\Neutral\mf_neutral_Face05_noeyesmiddle.jpg	MF	neutral	no	middle	no	1	286	z	z	66	6	60
Exp V1 Meye Znoeye	15	25	female	Finished stimuli\MO\Neutral\mo_neutral_Face01_noeyesbottom.jpg	MO	neutral	no	bottom	no	0	335	z	m	67	7	60
Exp V1 Meye Znoeye	15	25	female	Finished stimuli\WF\Fear\wf_fear_Face10_eyes.jpg	WF	fear	yes	nm	yes	0	447	m	z	66	6	60
Exp V1 Meye Znoeye	15	25	female	Finished stimuli\PF\Fear\pf_fear_Face03_eyes.jpg	PF	fear	yes	nm	yes	1	312	m	m	67	7	60
Exp V1 Meye Znoeye	15	25	female	Finished stimuli\PF\Neutral\pf_neutral_Face03_eyestop.jpg	PF	neutral	no	top	yes	1	270	m	m	67	7	60
Exp V1 Meye Znoeye	15	25	female	Finished stimuli\SW\Fear\sw_fear_Face06_eyesbottom.jpg	SW	fear	no	bottom	yes	1	268	m	m	67	7	60
Exp V1 Meye Znoeye	15	25	female	Finished stimuli\PE\Fear\pe_fear_Face08_noeyesbottom.jpg	PE	fear	no	bottom	no	1	351	z	z	67	7	60
Exp V1 Meye Znoeye	15	25	female	Finished stimuli\JJ\Fear\jj_fear_Face04_eyesbottom.jpg	JJ	fear	no	bottom	yes	1	325	m	m	67	7	60
Exp V1 Meye Znoeye	15	25	female	Finished stimuli\SW\Neutral\sw_neutral_Face06_eyesbottom.jpg	SW	neutral	no	bottom	yes	0	597	m	z	66	6	60
Exp V1 Meye Znoeye	15	25	female	Finished stimuli\nrR\Neutral\nrr_neutral_Face02_noeyes.jpg	nr	neutral	yes	nm	no	0	315	z	m	67	7	60
Exp V1 Meye Znoeye	15	25	female	Finished stimuli\MF\Fear\mf_fear_Face05_noeyesbottom.jpg	MF	fear	no	bottom	no	1	296	z	z	66	6	60
Exp V1 Meye Znoeye	15	25	female	Finished stimuli\SW\Neutral\sw_neutral_Face06_noeyes.jpg	SW	neutral	yes	nm	no	0	243	z	m	67	7	60
Exp V1 Meye Znoeye	15	25	female	Finished stimuli\WF\Fear\wf_fear_Face10_noeyesbottom.jpg	WF	fear	no	bottom	no	1	572	z	z	66	6	60
Exp V1 Meye Znoeye	15	25	female	Finished stimuli\nrR\Fear\nrr_fear_Face02_eyesbottom.jpg	nr	fear	no	bottom	yes	1	317	m	m	67	7	60
Exp V1 Meye Znoeye	15	25	female	Finished stimuli\MO\Fear\mo_fear_Face01_eyesbottom.jpg	MO	fear	no	bottom	yes	1	323	m	m	67	7	60
Exp V1 Meye Znoeye	15	25	female	Finished stimuli\MF\Fear\mf_fear_Face05_noeyestop.jpg	MF	fear	no	top	no	1	539	z	z	66	6	60
Exp V1 Meye Znoeye	15	25	female	Finished stimuli\PF\Fear\pf_fear_Face03_eyesmiddle.jpg	PF	fear	no	middle	yes	1	358	m	m	67	7	60
Exp V1 Meye Znoeye	15	25	female	Finished stimuli\SW\Neutral\sw_neutral_Face06_noeyestop.jpg	SW	neutral	no	top	no	0	492	z	m	67	7	60
Exp V1 Meye Znoeye	15	25	female	Finished stimuli\MO\Fear\mo_fear_Face01_eyes.jpg	MO	fear	yes	nm	yes	1	317	m	m	66	6	60
Exp V1 Meye Znoeye	15	25	female	Finished stimuli\PF\Neutral\pf_neutral_Face03_eyesbottom.jpg	PF	neutral	no	bottom	yes	1	363	m	m	66	6	60
Exp V1 Meye Znoeye	15	25	female	Finished stimuli\MO\Neutral\mo_neutral_Face01_noeyestop.jpg	MO	neutral	no	top	no	1	324	z	z	67	7	60
Exp V1 Meye Znoeye	15	25	female	Finished stimuli\MO\Neutral\mo_neutral_Face01_noeyes.jpg	MO	neutral	yes	nm	no	1	412	z	z	66	6	60
Exp V1 Meye Znoeye	15	25	female	Finished stimuli\MO\Fear\mo_fear_Face01_eyestop.jpg	MO	fear	no	top	yes	1	333	m	m	67	7	60
Exp V1 Meye Znoeye	15	25	female	Finished stimuli\SW\Fear\sw_fear_Face06_noeyes.jpg	SW	fear	yes	nm	no	1	517	z	z	67	7	60
Exp V1 Meye Znoeye	15	25	female	Finished stimuli\SW\Fear\sw_fear_Face06_eyesmiddle.jpg	SW	fear	no	middle	yes	1	307	m	m	67	7	60
Exp V1 Meye Znoeye	15	25	female	Finished stimuli\nrR\Fear\nrr_fear_Face02_noeyes.jpg	nr	fear	yes	nm	no	1	359	z	z	67	7	60
Exp V1 Meye Znoeye	15	25	female	Finished stimuli\MO\Neutral\mo_neutral_Face01_eyesbottom.jpg	MO	neutral	no	bottom	yes	1	468	m	m	67	7	60
Exp V1 Meye Znoeye	15	25	female	Finished stimuli\PF\Fear\pf_fear_Face03_noeyesmiddle.jpg	PF	fear	no	middle	no	1	232	z	z	67	7	60
Exp V1 Meye Znoeye	15	25	female	Finished stimuli\MO\Fear\mo_fear_Face01_eyesmiddle.jpg	MO	fear	no	middle	yes	1	302	m	m	67	7	60
Exp V1 Meye Znoeye	15	25	female	Finished stimuli\MF\Neutral\mf_neutral_Face05_noeyestop.jpg	MF	neutral	no	top	no	1	256	z	z	66	6	60
Exp V1 Meye Znoeye	15	25	female	Finished stimuli\PF\Fear\pf_fear_Face03_noeyes.jpg	PF	fear	yes	nm	no	1	251	z	z	66	6	60
Exp V1 Meye Znoeye	15	25	female	Finished stimuli\SW\Fear\sw_fear_Face06_noeyesbottom.jpg	SW	fear	no	bottom	no	1	516	z	z	67	7	60
Exp V1 Meye Znoeye	15	25	female	Finished stimuli\JJ\Fear\jj_fear_Face04_noeyesmiddle.jpg	JJ	fear	no	middle	no	1	290	z	z	67	7	60
Exp V1 Meye Znoeye	15	25	female	Finished stimuli\PF\Fear\pf_fear_Face03_noeyesbottom.jpg	PF	fear	no	bottom	no	1	210	z	z	66	6	60
Exp V1 Meye Znoeye	15	25	female	Finished stimuli\JJ\Fear\jj_fear_Face04_noeyes.jpg	JJ	fear	yes	nm	no	1	219	z	z	67	7	60
Exp V1 Meye Znoeye	15	25	female	Finished stimuli\PE\Fear\pe_fear_Face08_eyestop.jpg	PE	fear	no	top	yes	1	286	m	m	66	6	60
Exp V1 Meye Znoeye	15	25	female	Finished stimuli\PF\Neutral\pf_neutral_Face03_noeyes.jpg	PF	neutral	yes	nm	no	0	206	z	m	67	7	60
Exp V1 Meye Znoeye	15	25	female	Finished stimuli\nrR\Neutral\nrr_neutral_Face02_eyestop.jpg	nr	neutral	no	top	yes	1	231	m	m	66	6	60
Exp V1 Meye Znoeye	15	25	female	Finished stimuli\PE\Neutral\pe_neutral_Face08_eyesbottom.jpg	PE	neutral	no	bottom	yes	0	277	m	z	67	7	60
Exp V1 Meye Znoeye	15	25	female	Finished stimuli\PF\Neutral\pf_neutral_Face03_noeyesmiddle.jpg	PF	neutral	no	middle	no	0	307	z	m	67	7	60
Exp V1 Meye Znoeye	15	25	female	Finished stimuli\PF\Fear\pf_fear_Face03_noeyestop.jpg	PF	fear	no	top	no	1	814	z	z	66	6	60
Exp V1 Meye Znoeye	15	25	female	Finished stimuli\JJ\Neutral\jj_neutral_Face04_eyesbottom.jpg	JJ	neutral	no	bottom	yes	0	143	m	z	67	7	60
Exp V1 Meye Znoeye	15	25	female	Finished stimuli\JJ\Fear\jj_fear_Face04_noeyesbottom.jpg	JJ	fear	no	bottom	no	1	378	z	z	66	6	60
Exp V1 Meye Znoeye	15	25	female	Finished stimuli\JJ\Neutral\jj_neutral_Face04_noeyesbottom.jpg	JJ	neutral	no	bottom	no	0	301	z	m	66	6	60
Exp V1 Meye Znoeye	15	25	female	Finished stimuli\WF\Fear\wf_fear_Face10_noeyestop.jpg	WF	fear	no	top	no	1	320	z	z	67	7	60
Exp V1 Meye Znoeye	15	25	female	Finished stimuli\MO\Fear\mo_fear_Face01_noeyes.jpg	MO	fear	yes	nm	no	1	270	z	z	67	7	60
Exp V1 Meye Znoeye	15	25	female	Finished stimuli\WF\Fear\wf_fear_Face10_eyesbottom.jpg	WF	fear	no	bottom	yes	1	420	m	m	66	6	60
Exp V1 Meye Znoeye	15	25	female	Finished stimuli\MO\Fear\mo_fear_Face01_noeyestop.jpg	MO	fear	no	top	no	1	440	z	z	67	7	60
Exp V1 Meye Znoeye	15	25	female	Finished stimuli\nrR\Neutral\nrr_neutral_Face02_noeyesmiddle.jpg	nr	neutral	no	middle	no	1	948	z	z	67	7	60
Exp V1 Meye Znoeye	15	25	female	Finished stimuli\JJ\Neutral\jj_neutral_Face04_eyesmiddle.jpg	JJ	neutral	no	middle	yes	1	1387	m	m	67	7	60
Exp V1 Meye Znoeye	15	25	female	Finished stimuli\nrR\Fear\nrr_fear_Face02_eyes.jpg	nr	fear	yes	nm	yes	1	430	m	m	67	7	60
Exp V1 Meye Znoeye	15	25	female	Finished stimuli\nrR\Fear\nrr_fear_Face02_eyesmiddle.jpg	nr	fear	no	middle	yes	1	220	m	m	67	7	60
Exp V1 Meye Znoeye	15	25	female	Finished stimuli\SW\Neutral\sw_neutral_Face06_eyesmiddle.jpg	SW	neutral	no	middle	yes	1	184	m	m	67	7	60
Exp V1 Meye Znoeye	15	25	female	Finished stimuli\WF\Neutral\wf_neutral_Face10_eyesmiddle.jpg	WF	neutral	no	middle	yes	1	371	m	m	67	7	60
Exp V1 Meye Znoeye	15	25	female	Finished stimuli\JJ\Neutral\jj_neutral_Face04_noeyestop.jpg	JJ	neutral	no	top	no	0	379	z	m	67	7	60
Exp V1 Meye Znoeye	15	25	female	Finished stimuli\PE\Fear\pe_fear_Face08_noeyesmiddle.jpg	PE	fear	no	middle	no	1	1279	z	z	67	7	60
Exp V1 Meye Znoeye	15	25	female	Finished stimuli\PE\Neutral\pe_neutral_Face08_eyes.jpg	PE	neutral	yes	nm	yes	1	333	m	m	66	6	60
Exp V1 Meye Znoeye	15	25	female	Finished stimuli\nrR\Fear\nrr_fear_Face02_noeyesbottom.jpg	nr	fear	no	bottom	no	1	934	z	z	67	7	60
Exp V1 Meye Znoeye	15	25	female	Finished stimuli\PE\Neutral\pe_neutral_Face08_noeyestop.jpg	PE	neutral	no	top	no	1	822	z	z	67	7	60
Exp V1 Meye Znoeye	15	25	female	Finished stimuli\MF\Fear\mf_fear_Face05_noeyes.jpg	MF	fear	yes	nm	no	1	762	z	z	66	6	60
Exp V1 Meye Znoeye	15	25	female	Finished stimuli\JJ\Neutral\jj_neutral_Face04_noeyes.jpg	JJ	neutral	yes	nm	no	1	691	z	z	67	7	60
Exp V1 Meye Znoeye	15	25	female	Finished stimuli\nrR\Neutral\nrr_neutral_Face02_eyesbottom.jpg	nr	neutral	no	bottom	yes	1	643	m	m	67	7	60
Exp V1 Meye Znoeye	15	25	female	Finished stimuli\nrR\Neutral\nrr_neutral_Face02_noeyestop.jpg	nr	neutral	no	top	no	1	724	z	z	66	6	60
Exp V1 Meye Znoeye	15	25	female	Finished stimuli\MF\Neutral\mf_neutral_Face05_eyes.jpg	MF	neutral	yes	nm	yes	1	461	m	m	66	6	60
Exp V1 Meye Znoeye	15	25	female	Finished stimuli\nrR\Neutral\nrr_neutral_Face02_eyes.jpg	nr	neutral	yes	nm	yes	1	271	m	m	67	7	60
Exp V1 Meye Znoeye	15	25	female	Finished stimuli\PE\Fear\pe_fear_Face08_eyesmiddle.jpg	PE	fear	no	middle	yes	1	413	m	m	66	6	60
Exp V1 Meye Znoeye	15	25	female	Finished stimuli\MO\Neutral\mo_neutral_Face01_eyesmiddle.jpg	MO	neutral	no	middle	yes	1	270	m	m	67	7	60
Exp V1 Meye Znoeye	15	25	female	Finished stimuli\PE\Neutral\pe_neutral_Face08_noeyesbottom.jpg	PE	neutral	no	bottom	no	1	300	z	z	67	7	60
Exp V1 Meye Znoeye	15	25	female	Finished stimuli\JJ\Neutral\jj_neutral_Face04_eyes.jpg	JJ	neutral	yes	nm	yes	0	271	m	z	66	6	60
Exp V1 Meye Znoeye	15	25	female	Finished stimuli\PE\Neutral\pe_neutral_Face08_eyesmiddle.jpg	PE	neutral	no	middle	yes	1	221	m	m	67	7	60
Exp V1 Meye Znoeye	15	25	female	Finished stimuli\PF\Neutral\pf_neutral_Face03_noeyestop.jpg	PF	neutral	no	top	no	1	336	z	z	66	6	60
Exp V1 Meye Znoeye	15	25	female	Finished stimuli\SW\Fear\sw_fear_Face06_noeyesmiddle.jpg	SW	fear	no	middle	no	1	643	z	z	66	6	60
Exp V1 Meye Znoeye	15	25	female	Finished stimuli\PE\Fear\pe_fear_Face08_noeyestop.jpg	PE	fear	no	top	no	1	396	z	z	66	6	60
Exp V1 Meye Znoeye	15	25	female	Finished stimuli\nrR\Fear\nrr_fear_Face02_eyestop.jpg	nr	fear	no	top	yes	0	506	m	z	66	6	60
Exp V1 Meye Znoeye	15	25	female	Finished stimuli\SW\Fear\sw_fear_Face06_eyestop.jpg	SW	fear	no	top	yes	1	277	m	m	66	6	60
Exp V1 Meye Znoeye	15	25	female	Finished stimuli\MF\Neutral\mf_neutral_Face05_eyesbottom.jpg	MF	neutral	no	bottom	yes	1	411	m	m	66	6	60
Exp V1 Meye Znoeye	15	25	female	Finished stimuli\MF\Fear\mf_fear_Face05_eyes.jpg	MF	fear	yes	nm	yes	1	348	m	m	66	6	60
Exp V1 Meye Znoeye	15	25	female	Finished stimuli\PE\Fear\pe_fear_Face08_eyesbottom.jpg	PE	fear	no	bottom	yes	1	511	m	m	67	7	60
Exp V1 Meye Znoeye	15	25	female	Finished stimuli\WF\Fear\wf_fear_Face10_noeyes.jpg	WF	fear	yes	nm	no	0	189	z	m	67	7	60
Exp V1 Meye Znoeye	15	25	female	Finished stimuli\PE\Fear\pe_fear_Face08_noeyestop.jpg	PE	fear	no	top	no	1	395	z	z	67	7	60
Exp V1 Meye Znoeye	15	25	female	Finished stimuli\PE\Fear\pe_fear_Face08_noeyesbottom.jpg	PE	fear	no	bottom	no	1	457	z	z	67	7	60
Exp V1 Meye Znoeye	15	25	female	Finished stimuli\SW\Fear\sw_fear_Face06_eyestop.jpg	SW	fear	no	top	yes	1	244	m	m	67	7	60
Exp V1 Meye Znoeye	15	25	female	Finished stimuli\SW\Neutral\sw_neutral_Face06_eyestop.jpg	SW	neutral	no	top	yes	0	844	m	z	66	6	60
Exp V1 Meye Znoeye	15	25	female	Finished stimuli\MF\Fear\mf_fear_Face05_eyestop.jpg	MF	fear	no	top	yes	1	293	m	m	66	6	60
Exp V1 Meye Znoeye	15	25	female	Finished stimuli\nrR\Fear\nrr_fear_Face02_eyesmiddle.jpg	nr	fear	no	middle	yes	1	565	m	m	67	7	60
Exp V1 Meye Znoeye	15	25	female	Finished stimuli\SW\Fear\sw_fear_Face06_eyesmiddle.jpg	SW	fear	no	middle	yes	1	310	m	m	66	6	60
Exp V1 Meye Znoeye	15	25	female	Finished stimuli\WF\Neutral\wf_neutral_Face10_noeyes.jpg	WF	neutral	yes	nm	no	1	404	z	z	66	6	60
Exp V1 Meye Znoeye	15	25	female	Finished stimuli\WF\Neutral\wf_neutral_Face10_eyesmiddle.jpg	WF	neutral	no	middle	yes	1	317	m	m	67	7	60
Exp V1 Meye Znoeye	15	25	female	Finished stimuli\JJ\Neutral\jj_neutral_Face04_noeyes.jpg	JJ	neutral	yes	nm	no	1	355	z	z	67	7	60
Exp V1 Meye Znoeye	15	25	female	Finished stimuli\MO\Fear\mo_fear_Face01_eyestop.jpg	MO	fear	no	top	yes	1	241	m	m	67	7	60
Exp V1 Meye Znoeye	15	25	female	Finished stimuli\PF\Fear\pf_fear_Face03_eyesbottom.jpg	PF	fear	no	bottom	yes	0	318	m	z	67	7	60
Exp V1 Meye Znoeye	15	25	female	Finished stimuli\nrR\Fear\nrr_fear_Face02_noeyesbottom.jpg	nr	fear	no	bottom	no	0	348	z	m	67	7	60
Exp V1 Meye Znoeye	15	25	female	Finished stimuli\WF\Fear\wf_fear_Face10_eyesmiddle.jpg	WF	fear	no	middle	yes	0	376	m	z	67	7	60
Exp V1 Meye Znoeye	15	25	female	Finished stimuli\PF\Fear\pf_fear_Face03_noeyesbottom.jpg	PF	fear	no	bottom	no	1	443	z	z	67	7	60
Exp V1 Meye Znoeye	15	25	female	Finished stimuli\JJ\Fear\jj_fear_Face04_eyesbottom.jpg	JJ	fear	no	bottom	yes	1	427	m	m	67	7	60
Exp V1 Meye Znoeye	15	25	female	Finished stimuli\MO\Fear\mo_fear_Face01_eyesbottom.jpg	MO	fear	no	bottom	yes	1	399	m	m	67	7	60
Exp V1 Meye Znoeye	15	25	female	Finished stimuli\WF\Fear\wf_fear_Face10_eyesbottom.jpg	WF	fear	no	bottom	yes	1	301	m	m	67	7	60
Exp V1 Meye Znoeye	15	25	female	Finished stimuli\PE\Fear\pe_fear_Face08_noeyesmiddle.jpg	PE	fear	no	middle	no	1	344	z	z	66	6	60
Exp V1 Meye Znoeye	15	25	female	Finished stimuli\nrR\Fear\nrr_fear_Face02_eyesbottom.jpg	nr	fear	no	bottom	yes	0	563	m	z	66	6	60
Exp V1 Meye Znoeye	15	25	female	Finished stimuli\WF\Neutral\wf_neutral_Face10_eyes.jpg	WF	neutral	yes	nm	yes	0	379	m	z	67	7	60
Exp V1 Meye Znoeye	15	25	female	Finished stimuli\PE\Neutral\pe_neutral_Face08_noeyesmiddle.jpg	PE	neutral	no	middle	no	1	510	z	z	66	6	60
Exp V1 Meye Znoeye	15	25	female	Finished stimuli\nrR\Neutral\nrr_neutral_Face02_eyestop.jpg	nr	neutral	no	top	yes	0	708	m	z	66	6	60
Exp V1 Meye Znoeye	15	25	female	Finished stimuli\PE\Fear\pe_fear_Face08_noeyes.jpg	PE	fear	yes	nm	no	1	362	z	z	67	7	60
Exp V1 Meye Znoeye	15	25	female	Finished stimuli\MF\Fear\mf_fear_Face05_noeyes.jpg	MF	fear	yes	nm	no	1	315	z	z	67	7	60
Exp V1 Meye Znoeye	15	25	female	Finished stimuli\PF\Fear\pf_fear_Face03_noeyesmiddle.jpg	PF	fear	no	middle	no	1	265	z	z	67	7	60
Exp V1 Meye Znoeye	15	25	female	Finished stimuli\MF\Neutral\mf_neutral_Face05_eyes.jpg	MF	neutral	yes	nm	yes	1	316	m	m	66	6	60
Exp V1 Meye Znoeye	15	25	female	Finished stimuli\PF\Neutral\pf_neutral_Face03_noeyes.jpg	PF	neutral	yes	nm	no	1	314	z	z	67	7	60
Exp V1 Meye Znoeye	15	25	female	Finished stimuli\PF\Neutral\pf_neutral_Face03_eyes.jpg	PF	neutral	yes	nm	yes	1	480	m	m	67	7	60
Exp V1 Meye Znoeye	15	25	female	Finished stimuli\PF\Neutral\pf_neutral_Face03_noeyesmiddle.jpg	PF	neutral	no	middle	no	1	542	z	z	67	7	60
Exp V1 Meye Znoeye	15	25	female	Finished stimuli\MF\Neutral\mf_neutral_Face05_noeyestop.jpg	MF	neutral	no	top	no	1	345	z	z	66	6	60
Exp V1 Meye Znoeye	15	25	female	Finished stimuli\MO\Neutral\mo_neutral_Face01_eyesbottom.jpg	MO	neutral	no	bottom	yes	0	380	m	z	67	7	60
Exp V1 Meye Znoeye	15	25	female	Finished stimuli\PF\Neutral\pf_neutral_Face03_noeyesbottom.jpg	PF	neutral	no	bottom	no	1	392	z	z	67	7	60
Exp V1 Meye Znoeye	15	25	female	Finished stimuli\PF\Fear\pf_fear_Face03_eyes.jpg	PF	fear	yes	nm	yes	1	406	m	m	67	7	60
Exp V1 Meye Znoeye	15	25	female	Finished stimuli\JJ\Fear\jj_fear_Face04_noeyesmiddle.jpg	JJ	fear	no	middle	no	1	350	z	z	66	6	60
Exp V1 Meye Znoeye	15	25	female	Finished stimuli\nrR\Neutral\nrr_neutral_Face02_noeyesbottom.jpg	nr	neutral	no	bottom	no	1	212	z	z	66	6	60
Exp V1 Meye Znoeye	15	25	female	Finished stimuli\WF\Fear\wf_fear_Face10_eyes.jpg	WF	fear	yes	nm	yes	1	349	m	m	67	7	60
Exp V1 Meye Znoeye	15	25	female	Finished stimuli\JJ\Neutral\jj_neutral_Face04_noeyesmiddle.jpg	JJ	neutral	no	middle	no	1	363	z	z	67	7	60
Exp V1 Meye Znoeye	15	25	female	Finished stimuli\MO\Neutral\mo_neutral_Face01_noeyesmiddle.jpg	MO	neutral	no	middle	no	1	179	z	z	66	6	60
Exp V1 Meye Znoeye	15	25	female	Finished stimuli\PE\Neutral\pe_neutral_Face08_noeyestop.jpg	PE	neutral	no	top	no	1	261	z	z	67	7	60
Exp V1 Meye Znoeye	15	25	female	Finished stimuli\JJ\Fear\jj_fear_Face04_noeyesbottom.jpg	JJ	fear	no	bottom	no	1	281	z	z	67	7	60
Exp V1 Meye Znoeye	15	25	female	Finished stimuli\SW\Neutral\sw_neutral_Face06_eyesbottom.jpg	SW	neutral	no	bottom	yes	1	502	m	m	67	7	60
Exp V1 Meye Znoeye	15	25	female	Finished stimuli\PF\Fear\pf_fear_Face03_noeyes.jpg	PF	fear	yes	nm	no	1	258	z	z	67	7	60
Exp V1 Meye Znoeye	15	25	female	Finished stimuli\SW\Fear\sw_fear_Face06_noeyesbottom.jpg	SW	fear	no	bottom	no	1	245	z	z	66	6	60
Exp V1 Meye Znoeye	15	25	female	Finished stimuli\WF\Fear\wf_fear_Face10_noeyestop.jpg	WF	fear	no	top	no	1	205	z	z	67	7	60
Exp V1 Meye Znoeye	15	25	female	Finished stimuli\PF\Neutral\pf_neutral_Face03_eyestop.jpg	PF	neutral	no	top	yes	1	374	m	m	66	6	60
Exp V1 Meye Znoeye	15	25	female	Finished stimuli\nrR\Fear\nrr_fear_Face02_eyestop.jpg	nr	fear	no	top	yes	1	375	m	m	67	7	60
Exp V1 Meye Znoeye	15	25	female	Finished stimuli\MO\Neutral\mo_neutral_Face01_noeyes.jpg	MO	neutral	yes	nm	no	0	255	z	m	66	6	60
Exp V1 Meye Znoeye	15	25	female	Finished stimuli\MF\Neutral\mf_neutral_Face05_eyesmiddle.jpg	MF	neutral	no	middle	yes	1	650	m	m	67	7	60
Exp V1 Meye Znoeye	15	25	female	Finished stimuli\JJ\Neutral\jj_neutral_Face04_noeyestop.jpg	JJ	neutral	no	top	no	1	347	z	z	66	6	60
Exp V1 Meye Znoeye	15	25	female	Finished stimuli\PF\Fear\pf_fear_Face03_eyestop.jpg	PF	fear	no	top	yes	1	406	m	m	67	7	60
Exp V1 Meye Znoeye	15	25	female	Finished stimuli\PE\Neutral\pe_neutral_Face08_eyes.jpg	PE	neutral	yes	nm	yes	1	655	m	m	66	6	60
Exp V1 Meye Znoeye	15	25	female	Finished stimuli\WF\Fear\wf_fear_Face10_eyestop.jpg	WF	fear	no	top	yes	1	1290	m	m	67	7	60
Exp V1 Meye Znoeye	15	25	female	Finished stimuli\MO\Fear\mo_fear_Face01_noeyestop.jpg	MO	fear	no	top	no	1	299	z	z	67	7	60
Exp V1 Meye Znoeye	15	25	female	Finished stimuli\PE\Neutral\pe_neutral_Face08_noeyes.jpg	PE	neutral	yes	nm	no	1	639	z	z	67	7	60
Exp V1 Meye Znoeye	15	25	female	Finished stimuli\MO\Neutral\mo_neutral_Face01_eyestop.jpg	MO	neutral	no	top	yes	1	557	m	m	67	7	60
Exp V1 Meye Znoeye	15	25	female	Finished stimuli\JJ\Neutral\jj_neutral_Face04_eyes.jpg	JJ	neutral	yes	nm	yes	1	283	m	m	67	7	60
Exp V1 Meye Znoeye	15	25	female	Finished stimuli\JJ\Fear\jj_fear_Face04_noeyes.jpg	JJ	fear	yes	nm	no	0	802	z	m	67	7	60
Exp V1 Meye Znoeye	15	25	female	Finished stimuli\JJ\Fear\jj_fear_Face04_eyesmiddle.jpg	JJ	fear	no	middle	yes	1	1427	m	m	66	6	60
Exp V1 Meye Znoeye	15	25	female	Finished stimuli\PF\Neutral\pf_neutral_Face03_eyesmiddle.jpg	PF	neutral	no	middle	yes	0	279	m	z	66	6	60
Exp V1 Meye Znoeye	15	25	female	Finished stimuli\SW\Neutral\sw_neutral_Face06_noeyes.jpg	SW	neutral	yes	nm	no	1	501	z	z	67	7	60
Exp V1 Meye Znoeye	15	25	female	Finished stimuli\SW\Neutral\sw_neutral_Face06_eyes.jpg	SW	neutral	yes	nm	yes	1	584	m	m	66	6	60
Exp V1 Meye Znoeye	15	25	female	Finished stimuli\PE\Neutral\pe_neutral_Face08_eyesbottom.jpg	PE	neutral	no	bottom	yes	0	708	m	z	67	7	60
Exp V1 Meye Znoeye	15	25	female	Finished stimuli\SW\Fear\sw_fear_Face06_eyes.jpg	SW	fear	yes	nm	yes	1	311	m	m	66	6	60
Exp V1 Meye Znoeye	15	25	female	Finished stimuli\PE\Fear\pe_fear_Face08_eyes.jpg	PE	fear	yes	nm	yes	1	309	m	m	67	7	60
Exp V1 Meye Znoeye	15	25	female	Finished stimuli\MF\Fear\mf_fear_Face05_noeyesmiddle.jpg	MF	fear	no	middle	no	1	323	z	z	67	7	60
Exp V1 Meye Znoeye	15	25	female	Finished stimuli\MF\Neutral\mf_neutral_Face05_eyesbottom.jpg	MF	neutral	no	bottom	yes	0	363	m	z	67	7	60
Exp V1 Meye Znoeye	15	25	female	Finished stimuli\JJ\Neutral\jj_neutral_Face04_noeyesbottom.jpg	JJ	neutral	no	bottom	no	1	572	z	z	66	6	60
Exp V1 Meye Znoeye	15	25	female	Finished stimuli\WF\Fear\wf_fear_Face10_noeyesbottom.jpg	WF	fear	no	bottom	no	1	229	z	z	67	7	60
Exp V1 Meye Znoeye	15	25	female	Finished stimuli\WF\Neutral\wf_neutral_Face10_noeyestop.jpg	WF	neutral	no	top	no	1	434	z	z	67	7	60
Exp V1 Meye Znoeye	15	25	female	Finished stimuli\WF\Neutral\wf_neutral_Face10_noeyesmiddle.jpg	WF	neutral	no	middle	no	0	656	z	m	67	7	60
Exp V1 Meye Znoeye	15	25	female	Finished stimuli\MF\Fear\mf_fear_Face05_eyesbottom.jpg	MF	fear	no	bottom	yes	1	372	m	m	67	7	60
Exp V1 Meye Znoeye	15	25	female	Finished stimuli\MO\Neutral\mo_neutral_Face01_eyesmiddle.jpg	MO	neutral	no	middle	yes	1	468	m	m	67	7	60
Exp V1 Meye Znoeye	15	25	female	Finished stimuli\MF\Neutral\mf_neutral_Face05_eyestop.jpg	MF	neutral	no	top	yes	1	367	m	m	67	7	60
Exp V1 Meye Znoeye	15	25	female	Finished stimuli\PE\Neutral\pe_neutral_Face08_noeyesbottom.jpg	PE	neutral	no	bottom	no	1	679	z	z	67	7	60
Exp V1 Meye Znoeye	15	25	female	Finished stimuli\MO\Neutral\mo_neutral_Face01_noeyestop.jpg	MO	neutral	no	top	no	1	1365	z	z	67	7	60
Exp V1 Meye Znoeye	15	25	female	Finished stimuli\MF\Neutral\mf_neutral_Face05_noeyesmiddle.jpg	MF	neutral	no	middle	no	1	286	z	z	67	7	60
Exp V1 Meye Znoeye	15	25	female	Finished stimuli\nrR\Fear\nrr_fear_Face02_eyes.jpg	nr	fear	yes	nm	yes	1	599	m	m	66	6	60
Exp V1 Meye Znoeye	15	25	female	Finished stimuli\nrR\Fear\nrr_fear_Face02_noeyestop.jpg	nr	fear	no	top	no	0	325	z	m	66	6	60
Exp V1 Meye Znoeye	15	25	female	Finished stimuli\MO\Fear\mo_fear_Face01_noeyesbottom.jpg	MO	fear	no	bottom	no	1	502	z	z	67	7	60
Exp V1 Meye Znoeye	15	25	female	Finished stimuli\SW\Fear\sw_fear_Face06_noeyestop.jpg	SW	fear	no	top	no	1	273	z	z	66	6	60
Exp V1 Meye Znoeye	15	25	female	Finished stimuli\SW\Neutral\sw_neutral_Face06_noeyesmiddle.jpg	SW	neutral	no	middle	no	0	775	z	m	66	6	60
Exp V1 Meye Znoeye	15	25	female	Finished stimuli\MO\Fear\mo_fear_Face01_noeyesmiddle.jpg	MO	fear	no	middle	no	0	610	z	m	67	7	60
Exp V1 Meye Znoeye	15	25	female	Finished stimuli\nrR\Neutral\nrr_neutral_Face02_noeyesmiddle.jpg	nr	neutral	no	middle	no	1	435	z	z	66	6	60
Exp V1 Meye Znoeye	15	25	female	Finished stimuli\SW\Fear\sw_fear_Face06_noeyesmiddle.jpg	SW	fear	no	middle	no	1	369	z	z	66	6	60
Exp V1 Meye Znoeye	15	25	female	Finished stimuli\PE\Neutral\pe_neutral_Face08_eyestop.jpg	PE	neutral	no	top	yes	1	442	m	m	67	7	60
Exp V1 Meye Znoeye	15	25	female	Finished stimuli\nrR\Neutral\nrr_neutral_Face02_eyesbottom.jpg	nr	neutral	no	bottom	yes	1	480	m	m	67	7	60
Exp V1 Meye Znoeye	15	25	female	Finished stimuli\SW\Neutral\sw_neutral_Face06_noeyestop.jpg	SW	neutral	no	top	no	1	310	z	z	67	7	60
Exp V1 Meye Znoeye	15	25	female	Finished stimuli\PF\Neutral\pf_neutral_Face03_noeyestop.jpg	PF	neutral	no	top	no	1	283	z	z	67	7	60
Exp V1 Meye Znoeye	15	25	female	Finished stimuli\SW\Neutral\sw_neutral_Face06_eyesmiddle.jpg	SW	neutral	no	middle	yes	1	828	m	m	66	6	60
Exp V1 Meye Znoeye	15	25	female	Finished stimuli\nrR\Neutral\nrr_neutral_Face02_eyes.jpg	nr	neutral	yes	nm	yes	0	854	m	z	67	7	60
Exp V1 Meye Znoeye	15	25	female	Finished stimuli\PF\Fear\pf_fear_Face03_eyesmiddle.jpg	PF	fear	no	middle	yes	1	418	m	m	66	6	60
Exp V1 Meye Znoeye	15	25	female	Finished stimuli\PF\Neutral\pf_neutral_Face03_eyesbottom.jpg	PF	neutral	no	bottom	yes	0	501	m	z	67	7	60
Exp V1 Meye Znoeye	15	25	female	Finished stimuli\JJ\Neutral\jj_neutral_Face04_eyesmiddle.jpg	JJ	neutral	no	middle	yes	0	705	m	z	67	7	60
Exp V1 Meye Znoeye	15	25	female	Finished stimuli\PF\Fear\pf_fear_Face03_noeyestop.jpg	PF	fear	no	top	no	1	420	z	z	66	6	60
Exp V1 Meye Znoeye	15	25	female	Finished stimuli\PE\Fear\pe_fear_Face08_eyesmiddle.jpg	PE	fear	no	middle	yes	1	327	m	m	67	7	60
Exp V1 Meye Znoeye	15	25	female	Finished stimuli\WF\Neutral\wf_neutral_Face10_eyesbottom.jpg	WF	neutral	no	bottom	yes	0	448	m	z	66	6	60
Exp V1 Meye Znoeye	15	25	female	Finished stimuli\MO\Fear\mo_fear_Face01_eyesmiddle.jpg	MO	fear	no	middle	yes	1	281	m	m	67	7	60
Exp V1 Meye Znoeye	15	25	female	Finished stimuli\MO\Fear\mo_fear_Face01_noeyes.jpg	MO	fear	yes	nm	no	1	542	z	z	67	7	60
Exp V1 Meye Znoeye	15	25	female	Finished stimuli\nrR\Neutral\nrr_neutral_Face02_noeyestop.jpg	nr	neutral	no	top	no	1	418	z	z	67	7	60
Exp V1 Meye Znoeye	15	25	female	Finished stimuli\MF\Fear\mf_fear_Face05_noeyesbottom.jpg	MF	fear	no	bottom	no	1	357	z	z	66	6	60
Exp V1 Meye Znoeye	15	25	female	Finished stimuli\PE\Neutral\pe_neutral_Face08_eyesmiddle.jpg	PE	neutral	no	middle	yes	1	451	m	m	66	6	60
Exp V1 Meye Znoeye	15	25	female	Finished stimuli\MO\Neutral\mo_neutral_Face01_eyes.jpg	MO	neutral	yes	nm	yes	1	412	m	m	67	7	60
Exp V1 Meye Znoeye	15	25	female	Finished stimuli\MO\Fear\mo_fear_Face01_eyes.jpg	MO	fear	yes	nm	yes	1	364	m	m	67	7	60
Exp V1 Meye Znoeye	15	25	female	Finished stimuli\MF\Fear\mf_fear_Face05_noeyestop.jpg	MF	fear	no	top	no	0	765	z	m	67	7	60
Exp V1 Meye Znoeye	15	25	female	Finished stimuli\PE\Fear\pe_fear_Face08_eyestop.jpg	PE	fear	no	top	yes	1	390	m	m	67	7	60
Exp V1 Meye Znoeye	15	25	female	Finished stimuli\JJ\Neutral\jj_neutral_Face04_eyesbottom.jpg	JJ	neutral	no	bottom	yes	1	492	m	m	67	7	60
Exp V1 Meye Znoeye	15	25	female	Finished stimuli\JJ\Fear\jj_fear_Face04_eyes.jpg	JJ	fear	yes	nm	yes	1	467	m	m	66	6	60
Exp V1 Meye Znoeye	15	25	female	Finished stimuli\MF\Neutral\mf_neutral_Face05_noeyesbottom.jpg	MF	neutral	no	bottom	no	1	495	z	z	67	7	60
Exp V1 Meye Znoeye	15	25	female	Finished stimuli\nrR\Neutral\nrr_neutral_Face02_noeyes.jpg	nr	neutral	yes	nm	no	0	578	z	m	66	6	60
Exp V1 Meye Znoeye	15	25	female	Finished stimuli\SW\Fear\sw_fear_Face06_eyesbottom.jpg	SW	fear	no	bottom	yes	1	541	m	m	66	6	60
Exp V1 Meye Znoeye	15	25	female	Finished stimuli\MF\Neutral\mf_neutral_Face05_noeyes.jpg	MF	neutral	yes	nm	no	0	825	z	m	67	7	60
Exp V1 Meye Znoeye	15	25	female	Finished stimuli\nrR\Neutral\nrr_neutral_Face02_eyesmiddle.jpg	nr	neutral	no	middle	yes	1	588	m	m	66	6	60
Exp V1 Meye Znoeye	15	25	female	Finished stimuli\MF\Fear\mf_fear_Face05_eyesmiddle.jpg	MF	fear	no	middle	yes	1	258	m	m	66	6	60
Exp V1 Meye Znoeye	15	25	female	Finished stimuli\JJ\Fear\jj_fear_Face04_noeyestop.jpg	JJ	fear	no	top	no	1	277	z	z	67	7	60
Exp V1 Meye Znoeye	15	25	female	Finished stimuli\nrR\Fear\nrr_fear_Face02_noeyesmiddle.jpg	nr	fear	no	middle	no	1	243	z	z	66	6	60
Exp V1 Meye Znoeye	15	25	female	Finished stimuli\JJ\Neutral\jj_neutral_Face04_eyestop.jpg	JJ	neutral	no	top	yes	1	572	m	m	67	7	60
Exp V1 Meye Znoeye	15	25	female	Finished stimuli\nrR\Fear\nrr_fear_Face02_noeyes.jpg	nr	fear	yes	nm	no	1	340	z	z	67	7	60
Exp V1 Meye Znoeye	15	25	female	Finished stimuli\WF\Fear\wf_fear_Face10_noeyesmiddle.jpg	WF	fear	no	middle	no	1	224	z	z	67	7	60
Exp V1 Meye Znoeye	15	25	female	Finished stimuli\JJ\Fear\jj_fear_Face04_eyestop.jpg	JJ	fear	no	top	yes	1	347	m	m	66	6	60
Exp V1 Meye Znoeye	15	25	female	Finished stimuli\WF\Neutral\wf_neutral_Face10_eyestop.jpg	WF	neutral	no	top	yes	0	358	m	z	66	6	60
Exp V1 Meye Znoeye	15	25	female	Finished stimuli\WF\Neutral\wf_neutral_Face10_noeyesbottom.jpg	WF	neutral	no	bottom	no	1	380	z	z	66	6	60
Exp V1 Meye Znoeye	15	25	female	Finished stimuli\MO\Neutral\mo_neutral_Face01_noeyesbottom.jpg	MO	neutral	no	bottom	no	0	255	z	m	67	7	60
Exp V1 Meye Znoeye	15	25	female	Finished stimuli\SW\Fear\sw_fear_Face06_noeyes.jpg	SW	fear	yes	nm	no	1	283	z	z	67	7	60
Exp V1 Meye Znoeye	15	25	female	Finished stimuli\SW\Neutral\sw_neutral_Face06_noeyesbottom.jpg	SW	neutral	no	bottom	no	1	355	z	z	66	6	60
Exp V1 Meye Znoeye	16	20	female	Finished stimuli\PE\Neutral\pe_neutral_Face08_eyesmiddle.jpg	PE	neutral	no	middle	yes	1	1115	m	m	53	8	45
Exp V1 Meye Znoeye	16	20	female	Finished stimuli\JJ\Fear\jj_fear_Face04_noeyesbottom.jpg	JJ	fear	no	bottom	no	1	468	z	z	53	8	45
Exp V1 Meye Znoeye	16	20	female	Finished stimuli\PF\Fear\pf_fear_Face03_noeyesbottom.jpg	PF	fear	no	bottom	no	1	538	z	z	53	8	45
Exp V1 Meye Znoeye	16	20	female	Finished stimuli\MO\Neutral\mo_neutral_Face01_eyesbottom.jpg	MO	neutral	no	bottom	yes	1	384	m	m	53	8	45
Exp V1 Meye Znoeye	16	20	female	Finished stimuli\nrR\Neutral\nrr_neutral_Face02_noeyes.jpg	nr	neutral	yes	nm	no	1	345	z	z	53	8	45
Exp V1 Meye Znoeye	16	20	female	Finished stimuli\SW\Fear\sw_fear_Face06_noeyes.jpg	SW	fear	yes	nm	no	1	598	z	z	53	8	45
Exp V1 Meye Znoeye	16	20	female	Finished stimuli\MO\Neutral\mo_neutral_Face01_noeyestop.jpg	MO	neutral	no	top	no	0	298	z	z	54	9	45
Exp V1 Meye Znoeye	16	20	female	Finished stimuli\MO\Neutral\mo_neutral_Face01_noeyes.jpg	MO	neutral	yes	nm	no	1	248	z	z	54	9	45
Exp V1 Meye Znoeye	16	20	female	Finished stimuli\SW\Neutral\sw_neutral_Face06_eyes.jpg	SW	neutral	yes	nm	yes	1	556	m	m	53	8	45
Exp V1 Meye Znoeye	16	20	female	Finished stimuli\SW\Neutral\sw_neutral_Face06_noeyesbottom.jpg	SW	neutral	no	bottom	no	1	768	z	z	54	9	45
Exp V1 Meye Znoeye	16	20	female	Finished stimuli\SW\Neutral\sw_neutral_Face06_noeyesmiddle.jpg	SW	neutral	no	middle	no	0	435	z	z	53	8	45
Exp V1 Meye Znoeye	16	20	female	Finished stimuli\JJ\Neutral\jj_neutral_Face04_eyes.jpg	JJ	neutral	yes	nm	yes	1	343	m	m	53	8	45
Exp V1 Meye Znoeye	16	20	female	Finished stimuli\nrR\Fear\nrr_fear_Face02_eyesmiddle.jpg	nr	fear	no	middle	yes	1	295	m	m	53	8	45
Exp V1 Meye Znoeye	16	20	female	Finished stimuli\WF\Neutral\wf_neutral_Face10_eyesbottom.jpg	WF	neutral	no	bottom	yes	1	880	m	z	54	9	45
Exp V1 Meye Znoeye	16	20	female	Finished stimuli\JJ\Neutral\jj_neutral_Face04_eyesmiddle.jpg	JJ	neutral	no	middle	yes	1	379	m	m	53	8	45
Exp V1 Meye Znoeye	16	20	female	Finished stimuli\PE\Neutral\pe_neutral_Face08_noeyestop.jpg	PE	neutral	no	top	no	1	476	z	z	54	9	45
Exp V1 Meye Znoeye	16	20	female	Finished stimuli\WF\Neutral\wf_neutral_Face10_noeyesbottom.jpg	WF	neutral	no	bottom	no	0	951	z	m	53	8	45
Exp V1 Meye Znoeye	16	20	female	Finished stimuli\SW\Fear\sw_fear_Face06_noeyesbottom.jpg	SW	fear	no	bottom	no	1	699	z	m	54	9	45
Exp V1 Meye Znoeye	16	20	female	Finished stimuli\SW\Neutral\sw_neutral_Face06_eyesbottom.jpg	SW	neutral	no	bottom	yes	0	515	m	z	53	8	45
Exp V1 Meye Znoeye	16	20	female	Finished stimuli\SW\Fear\sw_fear_Face06_eyesmiddle.jpg	SW	fear	no	middle	yes	1	319	m	m	54	9	45
Exp V1 Meye Znoeye	16	20	female	Finished stimuli\MF\Fear\mf_fear_Face05_noeyesbottom.jpg	MF	fear	no	bottom	no	1	474	z	z	53	8	45
Exp V1 Meye Znoeye	16	20	female	Finished stimuli\MF\Neutral\mf_neutral_Face05_eyesmiddle.jpg	MF	neutral	no	middle	yes	1	733	m	m	53	8	45
Exp V1 Meye Znoeye	16	20	female	Finished stimuli\WF\Fear\wf_fear_Face10_eyes.jpg	WF	fear	yes	nm	yes	0	723	m	z	53	8	45
Exp V1 Meye Znoeye	16	20	female	Finished stimuli\PE\Neutral\pe_neutral_Face08_noeyes.jpg	PE	neutral	yes	nm	no	1	377	z	z	53	8	45
Exp V1 Meye Znoeye	16	20	female	Finished stimuli\WF\Neutral\wf_neutral_Face10_eyes.jpg	WF	neutral	yes	nm	yes	1	322	m	m	53	8	45
Exp V1 Meye Znoeye	16	20	female	Finished stimuli\PF\Neutral\pf_neutral_Face03_eyestop.jpg	PF	neutral	no	top	yes	1	416	m	m	53	8	45
Exp V1 Meye Znoeye	16	20	female	Finished stimuli\WF\Fear\wf_fear_Face10_eyestop.jpg	WF	fear	no	top	yes	0	368	m	m	53	8	45
Exp V1 Meye Znoeye	16	20	female	Finished stimuli\SW\Fear\sw_fear_Face06_eyestop.jpg	SW	fear	no	top	yes	1	349	m	m	53	8	45
Exp V1 Meye Znoeye	16	20	female	Finished stimuli\WF\Neutral\wf_neutral_Face10_noeyesmiddle.jpg	WF	neutral	no	middle	no	1	921	z	z	54	9	45
Exp V1 Meye Znoeye	16	20	female	Finished stimuli\PF\Fear\pf_fear_Face03_noeyestop.jpg	PF	fear	no	top	no	1	404	z	z	53	8	45
Exp V1 Meye Znoeye	16	20	female	Finished stimuli\MO\Fear\mo_fear_Face01_noeyesbottom.jpg	MO	fear	no	bottom	no	1	570	z	z	53	8	45
Exp V1 Meye Znoeye	16	20	female	Finished stimuli\WF\Fear\wf_fear_Face10_noeyesmiddle.jpg	WF	fear	no	middle	no	1	456	z	z	53	8	45
Exp V1 Meye Znoeye	16	20	female	Finished stimuli\nrR\Neutral\nrr_neutral_Face02_eyesmiddle.jpg	nr	neutral	no	middle	yes	1	321	m	m	54	9	45
Exp V1 Meye Znoeye	16	20	female	Finished stimuli\nrR\Fear\nrr_fear_Face02_noeyestop.jpg	nr	fear	no	top	no	1	364	z	z	53	8	45
Exp V1 Meye Znoeye	16	20	female	Finished stimuli\MF\Neutral\mf_neutral_Face05_noeyesbottom.jpg	MF	neutral	no	bottom	no	1	1130	z	z	53	8	45
Exp V1 Meye Znoeye	16	20	female	Finished stimuli\nrR\Neutral\nrr_neutral_Face02_noeyesbottom.jpg	nr	neutral	no	bottom	no	1	664	z	z	53	8	45
Exp V1 Meye Znoeye	16	20	female	Finished stimuli\MO\Fear\mo_fear_Face01_noeyesmiddle.jpg	MO	fear	no	middle	no	0	385	z	z	53	8	45
Exp V1 Meye Znoeye	16	20	female	Finished stimuli\nrR\Fear\nrr_fear_Face02_noeyes.jpg	nr	fear	yes	nm	no	1	402	z	z	54	9	45
Exp V1 Meye Znoeye	16	20	female	Finished stimuli\MF\Fear\mf_fear_Face05_eyestop.jpg	MF	fear	no	top	yes	1	325	m	m	54	9	45
Exp V1 Meye Znoeye	16	20	female	Finished stimuli\SW\Fear\sw_fear_Face06_noeyesmiddle.jpg	SW	fear	no	middle	no	1	867	z	z	54	9	45
Exp V1 Meye Znoeye	16	20	female	Finished stimuli\PE\Fear\pe_fear_Face08_eyesbottom.jpg	PE	fear	no	bottom	yes	1	764	m	m	54	9	45
Exp V1 Meye Znoeye	16	20	female	Finished stimuli\WF\Neutral\wf_neutral_Face10_noeyestop.jpg	WF	neutral	no	top	no	1	402	z	z	54	9	45
Exp V1 Meye Znoeye	16	20	female	Finished stimuli\SW\Neutral\sw_neutral_Face06_eyestop.jpg	SW	neutral	no	top	yes	1	383	m	m	54	9	45
Exp V1 Meye Znoeye	16	20	female	Finished stimuli\PE\Fear\pe_fear_Face08_noeyes.jpg	PE	fear	yes	nm	no	1	391	z	z	53	8	45
Exp V1 Meye Znoeye	16	20	female	Finished stimuli\JJ\Fear\jj_fear_Face04_eyestop.jpg	JJ	fear	no	top	yes	1	355	m	m	53	8	45
Exp V1 Meye Znoeye	16	20	female	Finished stimuli\JJ\Fear\jj_fear_Face04_noeyesmiddle.jpg	JJ	fear	no	middle	no	1	310	z	z	54	9	45
Exp V1 Meye Znoeye	16	20	female	Finished stimuli\SW\Neutral\sw_neutral_Face06_noeyestop.jpg	SW	neutral	no	top	no	0	297	z	z	53	8	45
Exp V1 Meye Znoeye	16	20	female	Finished stimuli\PE\Fear\pe_fear_Face08_eyestop.jpg	PE	fear	no	top	yes	1	298	m	m	53	8	45
Exp V1 Meye Znoeye	16	20	female	Finished stimuli\PF\Neutral\pf_neutral_Face03_noeyes.jpg	PF	neutral	yes	nm	no	1	362	z	z	53	8	45
Exp V1 Meye Znoeye	16	20	female	Finished stimuli\MF\Neutral\mf_neutral_Face05_noeyes.jpg	MF	neutral	yes	nm	no	0	328	z	z	53	8	45
Exp V1 Meye Znoeye	16	20	female	Finished stimuli\JJ\Fear\jj_fear_Face04_eyesbottom.jpg	JJ	fear	no	bottom	yes	1	630	m	z	53	8	45
Exp V1 Meye Znoeye	16	20	female	Finished stimuli\WF\Neutral\wf_neutral_Face10_eyestop.jpg	WF	neutral	no	top	yes	1	793	m	z	53	8	45
Exp V1 Meye Znoeye	16	20	female	Finished stimuli\SW\Neutral\sw_neutral_Face06_eyesmiddle.jpg	SW	neutral	no	middle	yes	1	549	m	m	54	9	45
Exp V1 Meye Znoeye	16	20	female	Finished stimuli\MF\Neutral\mf_neutral_Face05_eyes.jpg	MF	neutral	yes	nm	yes	1	456	m	m	53	8	45
Exp V1 Meye Znoeye	16	20	female	Finished stimuli\JJ\Fear\jj_fear_Face04_eyes.jpg	JJ	fear	yes	nm	yes	1	449	m	m	54	9	45
Exp V1 Meye Znoeye	16	20	female	Finished stimuli\WF\Fear\wf_fear_Face10_noeyestop.jpg	WF	fear	no	top	no	0	375	z	z	54	9	45
Exp V1 Meye Znoeye	16	20	female	Finished stimuli\MO\Neutral\mo_neutral_Face01_noeyesbottom.jpg	MO	neutral	no	bottom	no	1	517	z	z	54	9	45
Exp V1 Meye Znoeye	16	20	female	Finished stimuli\PF\Fear\pf_fear_Face03_eyes.jpg	PF	fear	yes	nm	yes	1	296	m	m	53	8	45
Exp V1 Meye Znoeye	16	20	female	Finished stimuli\nrR\Neutral\nrr_neutral_Face02_eyesbottom.jpg	nr	neutral	no	bottom	yes	0	465	m	z	53	8	45
Exp V1 Meye Znoeye	16	20	female	Finished stimuli\SW\Fear\sw_fear_Face06_noeyestop.jpg	SW	fear	no	top	no	1	401	z	z	53	8	45
Exp V1 Meye Znoeye	16	20	female	Finished stimuli\PF\Neutral\pf_neutral_Face03_eyesbottom.jpg	PF	neutral	no	bottom	yes	1	452	m	z	53	8	45
Exp V1 Meye Znoeye	16	20	female	Finished stimuli\PE\Fear\pe_fear_Face08_eyesmiddle.jpg	PE	fear	no	middle	yes	1	297	m	m	53	8	45
Exp V1 Meye Znoeye	16	20	female	Finished stimuli\JJ\Neutral\jj_neutral_Face04_noeyestop.jpg	JJ	neutral	no	top	no	0	386	z	z	53	8	45
Exp V1 Meye Znoeye	16	20	female	Finished stimuli\PE\Neutral\pe_neutral_Face08_noeyesmiddle.jpg	PE	neutral	no	middle	no	1	515	z	z	53	8	45
Exp V1 Meye Znoeye	16	20	female	Finished stimuli\MO\Fear\mo_fear_Face01_noeyestop.jpg	MO	fear	no	top	no	1	310	z	z	53	8	45
Exp V1 Meye Znoeye	16	20	female	Finished stimuli\MF\Neutral\mf_neutral_Face05_noeyestop.jpg	MF	neutral	no	top	no	0	297	z	m	53	8	45
Exp V1 Meye Znoeye	16	20	female	Finished stimuli\MF\Neutral\mf_neutral_Face05_eyestop.jpg	MF	neutral	no	top	yes	1	722	m	m	54	9	45
Exp V1 Meye Znoeye	16	20	female	Finished stimuli\PF\Neutral\pf_neutral_Face03_noeyestop.jpg	PF	neutral	no	top	no	1	344	z	z	54	9	45
Exp V1 Meye Znoeye	16	20	female	Finished stimuli\PF\Neutral\pf_neutral_Face03_noeyesmiddle.jpg	PF	neutral	no	middle	no	0	1192	z	z	53	8	45
Exp V1 Meye Znoeye	16	20	female	Finished stimuli\JJ\Neutral\jj_neutral_Face04_eyestop.jpg	JJ	neutral	no	top	yes	1	900	m	m	53	8	45
Exp V1 Meye Znoeye	16	20	female	Finished stimuli\JJ\Fear\jj_fear_Face04_eyesmiddle.jpg	JJ	fear	no	middle	yes	1	397	m	m	53	8	45
Exp V1 Meye Znoeye	16	20	female	Finished stimuli\PF\Neutral\pf_neutral_Face03_eyes.jpg	PF	neutral	yes	nm	yes	1	440	m	z	53	8	45
Exp V1 Meye Znoeye	16	20	female	Finished stimuli\nrR\Neutral\nrr_neutral_Face02_eyes.jpg	nr	neutral	yes	nm	yes	0	395	m	m	53	8	45
Exp V1 Meye Znoeye	16	20	female	Finished stimuli\PE\Fear\pe_fear_Face08_noeyesmiddle.jpg	PE	fear	no	middle	no	1	423	z	z	54	9	45
Exp V1 Meye Znoeye	16	20	female	Finished stimuli\nrR\Fear\nrr_fear_Face02_eyesbottom.jpg	nr	fear	no	bottom	yes	1	559	m	z	53	8	45
Exp V1 Meye Znoeye	16	20	female	Finished stimuli\MF\Fear\mf_fear_Face05_noeyesmiddle.jpg	MF	fear	no	middle	no	0	499	z	z	54	9	45
Exp V1 Meye Znoeye	16	20	female	Finished stimuli\JJ\Neutral\jj_neutral_Face04_noeyes.jpg	JJ	neutral	yes	nm	no	1	499	z	m	53	8	45
Exp V1 Meye Znoeye	16	20	female	Finished stimuli\MO\Fear\mo_fear_Face01_noeyes.jpg	MO	fear	yes	nm	no	1	515	z	z	53	8	45
Exp V1 Meye Znoeye	16	20	female	Finished stimuli\MF\Neutral\mf_neutral_Face05_noeyesmiddle.jpg	MF	neutral	no	middle	no	1	310	z	z	53	8	45
Exp V1 Meye Znoeye	16	20	female	Finished stimuli\SW\Neutral\sw_neutral_Face06_noeyes.jpg	SW	neutral	yes	nm	no	1	298	z	z	53	8	45
Exp V1 Meye Znoeye	16	20	female	Finished stimuli\PE\Neutral\pe_neutral_Face08_eyestop.jpg	PE	neutral	no	top	yes	1	474	m	m	53	8	45
Exp V1 Meye Znoeye	16	20	female	Finished stimuli\SW\Fear\sw_fear_Face06_eyes.jpg	SW	fear	yes	nm	yes	1	293	m	m	53	8	45
Exp V1 Meye Znoeye	16	20	female	Finished stimuli\PF\Fear\pf_fear_Face03_eyestop.jpg	PF	fear	no	top	yes	1	347	m	m	53	8	45
Exp V1 Meye Znoeye	16	20	female	Finished stimuli\nrR\Neutral\nrr_neutral_Face02_eyestop.jpg	nr	neutral	no	top	yes	1	644	m	m	54	9	45
Exp V1 Meye Znoeye	16	20	female	Finished stimuli\JJ\Fear\jj_fear_Face04_noeyestop.jpg	JJ	fear	no	top	no	0	354	z	z	53	8	45
Exp V1 Meye Znoeye	16	20	female	Finished stimuli\nrR\Fear\nrr_fear_Face02_eyestop.jpg	nr	fear	no	top	yes	1	229	m	m	53	8	45
Exp V1 Meye Znoeye	16	20	female	Finished stimuli\MF\Neutral\mf_neutral_Face05_eyesbottom.jpg	MF	neutral	no	bottom	yes	1	560	m	m	53	8	45
Exp V1 Meye Znoeye	16	20	female	Finished stimuli\MO\Fear\mo_fear_Face01_eyesbottom.jpg	MO	fear	no	bottom	yes	1	372	m	m	54	9	45
Exp V1 Meye Znoeye	16	20	female	Finished stimuli\PF\Neutral\pf_neutral_Face03_noeyesbottom.jpg	PF	neutral	no	bottom	no	0	586	z	z	54	9	45
Exp V1 Meye Znoeye	16	20	female	Finished stimuli\nrR\Fear\nrr_fear_Face02_noeyesmiddle.jpg	nr	fear	no	middle	no	1	458	z	z	53	8	45
Exp V1 Meye Znoeye	16	20	female	Finished stimuli\MO\Neutral\mo_neutral_Face01_eyes.jpg	MO	neutral	yes	nm	yes	1	395	m	m	53	8	45
Exp V1 Meye Znoeye	16	20	female	Finished stimuli\PE\Fear\pe_fear_Face08_noeyesbottom.jpg	PE	fear	no	bottom	no	1	326	z	z	53	8	45
Exp V1 Meye Znoeye	16	20	female	Finished stimuli\WF\Fear\wf_fear_Face10_noeyesbottom.jpg	WF	fear	no	bottom	no	1	356	z	z	53	8	45
Exp V1 Meye Znoeye	16	20	female	Finished stimuli\PF\Fear\pf_fear_Face03_eyesbottom.jpg	PF	fear	no	bottom	yes	1	343	m	z	53	8	45
Exp V1 Meye Znoeye	16	20	female	Finished stimuli\WF\Fear\wf_fear_Face10_eyesbottom.jpg	WF	fear	no	bottom	yes	1	736	m	z	53	8	45
Exp V1 Meye Znoeye	16	20	female	Finished stimuli\PF\Fear\pf_fear_Face03_noeyes.jpg	PF	fear	yes	nm	no	0	337	z	m	54	9	45
Exp V1 Meye Znoeye	16	20	female	Finished stimuli\nrR\Neutral\nrr_neutral_Face02_noeyestop.jpg	nr	neutral	no	top	no	0	544	z	z	53	8	45
Exp V1 Meye Znoeye	16	20	female	Finished stimuli\WF\Fear\wf_fear_Face10_noeyes.jpg	WF	fear	yes	nm	no	1	305	z	z	53	8	45
Exp V1 Meye Znoeye	16	20	female	Finished stimuli\MO\Fear\mo_fear_Face01_eyesmiddle.jpg	MO	fear	no	middle	yes	1	298	m	m	53	8	45
Exp V1 Meye Znoeye	16	20	female	Finished stimuli\PE\Neutral\pe_neutral_Face08_eyesbottom.jpg	PE	neutral	no	bottom	yes	1	514	m	z	53	8	45
Exp V1 Meye Znoeye	16	20	female	Finished stimuli\nrR\Fear\nrr_fear_Face02_eyes.jpg	nr	fear	yes	nm	yes	1	269	m	m	53	8	45
Exp V1 Meye Znoeye	16	20	female	Finished stimuli\MO\Fear\mo_fear_Face01_eyestop.jpg	MO	fear	no	top	yes	1	385	m	m	54	9	45
Exp V1 Meye Znoeye	16	20	female	Finished stimuli\PE\Neutral\pe_neutral_Face08_noeyesbottom.jpg	PE	neutral	no	bottom	no	1	505	z	z	53	8	45
Exp V1 Meye Znoeye	16	20	female	Finished stimuli\PF\Fear\pf_fear_Face03_eyesmiddle.jpg	PF	fear	no	middle	yes	1	242	m	m	53	8	45
Exp V1 Meye Znoeye	16	20	female	Finished stimuli\JJ\Neutral\jj_neutral_Face04_eyesbottom.jpg	JJ	neutral	no	bottom	yes	0	360	m	z	54	9	45
Exp V1 Meye Znoeye	16	20	female	Finished stimuli\MO\Neutral\mo_neutral_Face01_noeyesmiddle.jpg	MO	neutral	no	middle	no	1	731	z	z	53	8	45
Exp V1 Meye Znoeye	16	20	female	Finished stimuli\MF\Fear\mf_fear_Face05_eyesbottom.jpg	MF	fear	no	bottom	yes	1	425	m	z	53	8	45
Exp V1 Meye Znoeye	16	20	female	Finished stimuli\PF\Fear\pf_fear_Face03_noeyesmiddle.jpg	PF	fear	no	middle	no	0	842	z	z	54	9	45
Exp V1 Meye Znoeye	16	20	female	Finished stimuli\WF\Neutral\wf_neutral_Face10_noeyes.jpg	WF	neutral	yes	nm	no	0	352	z	m	53	8	45
Exp V1 Meye Znoeye	16	20	female	Finished stimuli\JJ\Neutral\jj_neutral_Face04_noeyesbottom.jpg	JJ	neutral	no	bottom	no	1	779	z	z	53	8	45
Exp V1 Meye Znoeye	16	20	female	Finished stimuli\MO\Neutral\mo_neutral_Face01_eyesmiddle.jpg	MO	neutral	no	middle	yes	1	372	m	m	53	8	45
Exp V1 Meye Znoeye	16	20	female	Finished stimuli\MF\Fear\mf_fear_Face05_noeyestop.jpg	MF	fear	no	top	no	1	434	z	z	54	9	45
Exp V1 Meye Znoeye	16	20	female	Finished stimuli\SW\Fear\sw_fear_Face06_eyesbottom.jpg	SW	fear	no	bottom	yes	1	1060	m	m	53	8	45
Exp V1 Meye Znoeye	16	20	female	Finished stimuli\nrR\Fear\nrr_fear_Face02_noeyesbottom.jpg	nr	fear	no	bottom	no	1	589	z	z	53	8	45
Exp V1 Meye Znoeye	16	20	female	Finished stimuli\nrR\Neutral\nrr_neutral_Face02_noeyesmiddle.jpg	nr	neutral	no	middle	no	0	360	z	m	53	8	45
Exp V1 Meye Znoeye	16	20	female	Finished stimuli\PE\Neutral\pe_neutral_Face08_eyes.jpg	PE	neutral	yes	nm	yes	0	572	m	z	54	9	45
Exp V1 Meye Znoeye	16	20	female	Finished stimuli\MO\Fear\mo_fear_Face01_eyes.jpg	MO	fear	yes	nm	yes	1	362	m	m	54	9	45
Exp V1 Meye Znoeye	16	20	female	Finished stimuli\PE\Fear\pe_fear_Face08_eyes.jpg	PE	fear	yes	nm	yes	1	368	m	m	54	9	45
Exp V1 Meye Znoeye	16	20	female	Finished stimuli\WF\Fear\wf_fear_Face10_eyesmiddle.jpg	WF	fear	no	middle	yes	1	390	m	m	53	8	45
Exp V1 Meye Znoeye	16	20	female	Finished stimuli\PE\Fear\pe_fear_Face08_noeyestop.jpg	PE	fear	no	top	no	1	377	z	z	54	9	45
Exp V1 Meye Znoeye	16	20	female	Finished stimuli\JJ\Neutral\jj_neutral_Face04_noeyesmiddle.jpg	JJ	neutral	no	middle	no	1	433	z	z	53	8	45
Exp V1 Meye Znoeye	16	20	female	Finished stimuli\JJ\Fear\jj_fear_Face04_noeyes.jpg	JJ	fear	yes	nm	no	1	381	z	z	54	9	45
Exp V1 Meye Znoeye	16	20	female	Finished stimuli\MO\Neutral\mo_neutral_Face01_eyestop.jpg	MO	neutral	no	top	yes	1	437	m	m	53	8	45
Exp V1 Meye Znoeye	16	20	female	Finished stimuli\PF\Neutral\pf_neutral_Face03_eyesmiddle.jpg	PF	neutral	no	middle	yes	1	1177	m	m	54	9	45
Exp V1 Meye Znoeye	16	20	female	Finished stimuli\WF\Neutral\wf_neutral_Face10_eyesmiddle.jpg	WF	neutral	no	middle	yes	0	330	m	m	54	9	45
Exp V1 Meye Znoeye	16	20	female	Finished stimuli\MF\Fear\mf_fear_Face05_eyes.jpg	MF	fear	yes	nm	yes	1	799	m	m	53	8	45
Exp V1 Meye Znoeye	16	20	female	Finished stimuli\MF\Fear\mf_fear_Face05_noeyes.jpg	MF	fear	yes	nm	no	1	531	z	z	53	8	45
Exp V1 Meye Znoeye	16	20	female	Finished stimuli\MF\Fear\mf_fear_Face05_eyesmiddle.jpg	MF	fear	no	middle	yes	1	417	m	m	53	8	45
Exp V1 Meye Znoeye	16	20	female	Finished stimuli\PE\Neutral\pe_neutral_Face08_noeyestop.jpg	PE	neutral	no	top	no	1	376	z	z	54	9	45
Exp V1 Meye Znoeye	16	20	female	Finished stimuli\JJ\Fear\jj_fear_Face04_noeyesmiddle.jpg	JJ	fear	no	middle	no	1	591	z	z	53	8	45
Exp V1 Meye Znoeye	16	20	female	Finished stimuli\JJ\Neutral\jj_neutral_Face04_noeyesbottom.jpg	JJ	neutral	no	bottom	no	1	891	z	z	54	9	45
Exp V1 Meye Znoeye	16	20	female	Finished stimuli\MO\Fear\mo_fear_Face01_eyestop.jpg	MO	fear	no	top	yes	1	465	m	m	53	8	45
Exp V1 Meye Znoeye	16	20	female	Finished stimuli\nrR\Neutral\nrr_neutral_Face02_eyes.jpg	nr	neutral	yes	nm	yes	1	370	m	m	53	8	45
Exp V1 Meye Znoeye	16	20	female	Finished stimuli\WF\Neutral\wf_neutral_Face10_eyesmiddle.jpg	WF	neutral	no	middle	yes	1	911	m	m	53	8	45
Exp V1 Meye Znoeye	16	20	female	Finished stimuli\nrR\Fear\nrr_fear_Face02_eyesbottom.jpg	nr	fear	no	bottom	yes	1	811	m	m	53	8	45
Exp V1 Meye Znoeye	16	20	female	Finished stimuli\nrR\Neutral\nrr_neutral_Face02_noeyes.jpg	nr	neutral	yes	nm	no	1	689	z	z	53	8	45
Exp V1 Meye Znoeye	16	20	female	Finished stimuli\PF\Fear\pf_fear_Face03_noeyesmiddle.jpg	PF	fear	no	middle	no	1	303	z	z	53	8	45
Exp V1 Meye Znoeye	16	20	female	Finished stimuli\JJ\Fear\jj_fear_Face04_eyesmiddle.jpg	JJ	fear	no	middle	yes	1	416	m	m	54	9	45
Exp V1 Meye Znoeye	16	20	female	Finished stimuli\SW\Neutral\sw_neutral_Face06_eyesbottom.jpg	SW	neutral	no	bottom	yes	1	376	m	m	53	8	45
Exp V1 Meye Znoeye	16	20	female	Finished stimuli\JJ\Fear\jj_fear_Face04_eyes.jpg	JJ	fear	yes	nm	yes	1	465	m	m	53	8	45
Exp V1 Meye Znoeye	16	20	female	Finished stimuli\JJ\Neutral\jj_neutral_Face04_noeyes.jpg	JJ	neutral	yes	nm	no	0	722	z	m	54	9	45
Exp V1 Meye Znoeye	16	20	female	Finished stimuli\PE\Fear\pe_fear_Face08_eyes.jpg	PE	fear	yes	nm	yes	0	272	m	z	54	9	45
Exp V1 Meye Znoeye	16	20	female	Finished stimuli\nrR\Fear\nrr_fear_Face02_eyesmiddle.jpg	nr	fear	no	middle	yes	1	507	m	m	53	8	45
Exp V1 Meye Znoeye	16	20	female	Finished stimuli\PF\Neutral\pf_neutral_Face03_noeyes.jpg	PF	neutral	yes	nm	no	1	460	z	z	53	8	45
Exp V1 Meye Znoeye	16	20	female	Finished stimuli\PE\Fear\pe_fear_Face08_eyesmiddle.jpg	PE	fear	no	middle	yes	1	324	m	m	53	8	45
Exp V1 Meye Znoeye	16	20	female	Finished stimuli\JJ\Fear\jj_fear_Face04_eyestop.jpg	JJ	fear	no	top	yes	1	681	m	m	53	8	45
Exp V1 Meye Znoeye	16	20	female	Finished stimuli\MF\Neutral\mf_neutral_Face05_eyestop.jpg	MF	neutral	no	top	yes	0	295	m	z	53	8	45
Exp V1 Meye Znoeye	16	20	female	Finished stimuli\WF\Fear\wf_fear_Face10_eyesbottom.jpg	WF	fear	no	bottom	yes	1	704	m	z	54	9	45
Exp V1 Meye Znoeye	16	20	female	Finished stimuli\PE\Neutral\pe_neutral_Face08_noeyesmiddle.jpg	PE	neutral	no	middle	no	0	745	z	m	53	8	45
Exp V1 Meye Znoeye	16	20	female	Finished stimuli\nrR\Neutral\nrr_neutral_Face02_noeyesmiddle.jpg	nr	neutral	no	middle	no	1	297	z	z	53	8	45
Exp V1 Meye Znoeye	16	20	female	Finished stimuli\SW\Fear\sw_fear_Face06_eyestop.jpg	SW	fear	no	top	yes	1	386	m	m	54	9	45
Exp V1 Meye Znoeye	16	20	female	Finished stimuli\MF\Neutral\mf_neutral_Face05_noeyestop.jpg	MF	neutral	no	top	no	1	506	z	z	53	8	45
Exp V1 Meye Znoeye	16	20	female	Finished stimuli\MF\Neutral\mf_neutral_Face05_noeyesmiddle.jpg	MF	neutral	no	middle	no	0	323	z	m	53	8	45
Exp V1 Meye Znoeye	16	20	female	Finished stimuli\MO\Neutral\mo_neutral_Face01_noeyesbottom.jpg	MO	neutral	no	bottom	no	0	745	z	z	53	8	45
Exp V1 Meye Znoeye	16	20	female	Finished stimuli\PE\Neutral\pe_neutral_Face08_eyesbottom.jpg	PE	neutral	no	bottom	yes	1	674	m	m	54	9	45
Exp V1 Meye Znoeye	16	20	female	Finished stimuli\MF\Neutral\mf_neutral_Face05_noeyes.jpg	MF	neutral	yes	nm	no	1	1309	z	z	53	8	45
Exp V1 Meye Znoeye	16	20	female	Finished stimuli\JJ\Fear\jj_fear_Face04_noeyesbottom.jpg	JJ	fear	no	bottom	no	1	689	z	z	54	9	45
Exp V1 Meye Znoeye	16	20	female	Finished stimuli\MO\Neutral\mo_neutral_Face01_eyesmiddle.jpg	MO	neutral	no	middle	yes	1	439	m	m	53	8	45
Exp V1 Meye Znoeye	16	20	female	Finished stimuli\MO\Neutral\mo_neutral_Face01_eyestop.jpg	MO	neutral	no	top	yes	0	1154	m	z	53	8	45
Exp V1 Meye Znoeye	16	20	female	Finished stimuli\SW\Fear\sw_fear_Face06_noeyesmiddle.jpg	SW	fear	no	middle	no	1	486	z	z	54	9	45
Exp V1 Meye Znoeye	16	20	female	Finished stimuli\WF\Neutral\wf_neutral_Face10_noeyestop.jpg	WF	neutral	no	top	no	1	452	z	z	54	9	45
Exp V1 Meye Znoeye	16	20	female	Finished stimuli\MO\Fear\mo_fear_Face01_eyes.jpg	MO	fear	yes	nm	yes	1	625	m	m	54	9	45
Exp V1 Meye Znoeye	16	20	female	Finished stimuli\PF\Fear\pf_fear_Face03_eyesmiddle.jpg	PF	fear	no	middle	yes	1	1050	m	m	53	8	45
Exp V1 Meye Znoeye	16	20	female	Finished stimuli\SW\Fear\sw_fear_Face06_noeyesbottom.jpg	SW	fear	no	bottom	no	1	408	z	z	54	9	45
Exp V1 Meye Znoeye	16	20	female	Finished stimuli\PF\Neutral\pf_neutral_Face03_eyesbottom.jpg	PF	neutral	no	bottom	yes	1	382	m	z	54	9	45
Exp V1 Meye Znoeye	16	20	female	Finished stimuli\PE\Neutral\pe_neutral_Face08_noeyes.jpg	PE	neutral	yes	nm	no	1	406	z	z	53	8	45
Exp V1 Meye Znoeye	16	20	female	Finished stimuli\nrR\Fear\nrr_fear_Face02_noeyesmiddle.jpg	nr	fear	no	middle	no	1	468	z	z	53	8	45
Exp V1 Meye Znoeye	16	20	female	Finished stimuli\WF\Neutral\wf_neutral_Face10_eyes.jpg	WF	neutral	yes	nm	yes	0	376	m	z	54	9	45
Exp V1 Meye Znoeye	16	20	female	Finished stimuli\JJ\Neutral\jj_neutral_Face04_eyes.jpg	JJ	neutral	yes	nm	yes	1	664	m	m	53	8	45
Exp V1 Meye Znoeye	16	20	female	Finished stimuli\WF\Fear\wf_fear_Face10_noeyes.jpg	WF	fear	yes	nm	no	1	1145	z	z	53	8	45
Exp V1 Meye Znoeye	16	20	female	Finished stimuli\PF\Neutral\pf_neutral_Face03_eyestop.jpg	PF	neutral	no	top	yes	1	378	m	m	54	9	45
Exp V1 Meye Znoeye	16	20	female	Finished stimuli\MF\Neutral\mf_neutral_Face05_eyes.jpg	MF	neutral	yes	nm	yes	1	474	m	m	53	8	45
Exp V1 Meye Znoeye	16	20	female	Finished stimuli\SW\Neutral\sw_neutral_Face06_eyesmiddle.jpg	SW	neutral	no	middle	yes	1	342	m	m	54	9	45
Exp V1 Meye Znoeye	16	20	female	Finished stimuli\PE\Neutral\pe_neutral_Face08_eyestop.jpg	PE	neutral	no	top	yes	1	302	m	m	53	8	45
Exp V1 Meye Znoeye	16	20	female	Finished stimuli\SW\Fear\sw_fear_Face06_noeyes.jpg	SW	fear	yes	nm	no	0	311	z	m	53	8	45
Exp V1 Meye Znoeye	16	20	female	Finished stimuli\WF\Fear\wf_fear_Face10_noeyesmiddle.jpg	WF	fear	no	middle	no	0	354	z	z	53	8	45
Exp V1 Meye Znoeye	16	20	female	Finished stimuli\nrR\Fear\nrr_fear_Face02_eyestop.jpg	nr	fear	no	top	yes	1	445	m	m	53	8	45
Exp V1 Meye Znoeye	16	20	female	Finished stimuli\PF\Neutral\pf_neutral_Face03_noeyesmiddle.jpg	PF	neutral	no	middle	no	1	603	z	z	53	8	45
Exp V1 Meye Znoeye	16	20	female	Finished stimuli\MF\Neutral\mf_neutral_Face05_eyesbottom.jpg	MF	neutral	no	bottom	yes	1	448	m	m	53	8	45
Exp V1 Meye Znoeye	16	20	female	Finished stimuli\SW\Neutral\sw_neutral_Face06_noeyestop.jpg	SW	neutral	no	top	no	1	374	z	z	53	8	45
Exp V1 Meye Znoeye	16	20	female	Finished stimuli\JJ\Neutral\jj_neutral_Face04_eyesmiddle.jpg	JJ	neutral	no	middle	yes	1	340	m	m	53	8	45
Exp V1 Meye Znoeye	16	20	female	Finished stimuli\nrR\Fear\nrr_fear_Face02_noeyestop.jpg	nr	fear	no	top	no	1	421	z	z	54	9	45
Exp V1 Meye Znoeye	16	20	female	Finished stimuli\PE\Neutral\pe_neutral_Face08_eyesmiddle.jpg	PE	neutral	no	middle	yes	1	357	m	m	53	8	45
Exp V1 Meye Znoeye	16	20	female	Finished stimuli\PF\Neutral\pf_neutral_Face03_noeyesbottom.jpg	PF	neutral	no	bottom	no	0	385	z	z	54	9	45
Exp V1 Meye Znoeye	16	20	female	Finished stimuli\WF\Neutral\wf_neutral_Face10_noeyesbottom.jpg	WF	neutral	no	bottom	no	1	345	z	z	53	8	45
Exp V1 Meye Znoeye	16	20	female	Finished stimuli\PE\Neutral\pe_neutral_Face08_noeyesbottom.jpg	PE	neutral	no	bottom	no	1	274	z	z	53	8	45
Exp V1 Meye Znoeye	16	20	female	Finished stimuli\WF\Fear\wf_fear_Face10_noeyestop.jpg	WF	fear	no	top	no	1	325	z	z	53	8	45
Exp V1 Meye Znoeye	16	20	female	Finished stimuli\PF\Fear\pf_fear_Face03_noeyestop.jpg	PF	fear	no	top	no	1	75	z	z	53	8	45
Exp V1 Meye Znoeye	16	20	female	Finished stimuli\MO\Fear\mo_fear_Face01_noeyestop.jpg	MO	fear	no	top	no	0	150	z	z	53	8	45
Exp V1 Meye Znoeye	16	20	female	Finished stimuli\WF\Neutral\wf_neutral_Face10_eyestop.jpg	WF	neutral	no	top	yes	0	81	m	z	53	8	45
Exp V1 Meye Znoeye	16	20	female	Finished stimuli\MO\Neutral\mo_neutral_Face01_eyesbottom.jpg	MO	neutral	no	bottom	yes	0	188	m	z	53	8	45
Exp V1 Meye Znoeye	16	20	female	Finished stimuli\MF\Fear\mf_fear_Face05_noeyesbottom.jpg	MF	fear	no	bottom	no	0	320	z	z	54	9	45
Exp V1 Meye Znoeye	16	20	female	Finished stimuli\PE\Neutral\pe_neutral_Face08_eyes.jpg	PE	neutral	yes	nm	yes	1	531	m	m	54	9	45
Exp V1 Meye Znoeye	16	20	female	Finished stimuli\nrR\Neutral\nrr_neutral_Face02_eyesmiddle.jpg	nr	neutral	no	middle	yes	0	297	m	z	54	9	45
Exp V1 Meye Znoeye	16	20	female	Finished stimuli\WF\Neutral\wf_neutral_Face10_noeyes.jpg	WF	neutral	yes	nm	no	0	425	z	z	53	8	45
Exp V1 Meye Znoeye	16	20	female	Finished stimuli\JJ\Fear\jj_fear_Face04_eyesbottom.jpg	JJ	fear	no	bottom	yes	1	338	m	z	53	8	45
Exp V1 Meye Znoeye	16	20	female	Finished stimuli\JJ\Neutral\jj_neutral_Face04_eyesbottom.jpg	JJ	neutral	no	bottom	yes	1	699	m	m	53	8	45
Exp V1 Meye Znoeye	16	20	female	Finished stimuli\nrR\Neutral\nrr_neutral_Face02_noeyestop.jpg	nr	neutral	no	top	no	1	354	z	z	53	8	45
Exp V1 Meye Znoeye	16	20	female	Finished stimuli\JJ\Fear\jj_fear_Face04_noeyes.jpg	JJ	fear	yes	nm	no	1	342	z	z	54	9	45
Exp V1 Meye Znoeye	16	20	female	Finished stimuli\SW\Neutral\sw_neutral_Face06_noeyes.jpg	SW	neutral	yes	nm	no	0	158	z	z	53	8	45
Exp V1 Meye Znoeye	16	20	female	Finished stimuli\MO\Neutral\mo_neutral_Face01_noeyes.jpg	MO	neutral	yes	nm	no	0	217	z	z	53	8	45
Exp V1 Meye Znoeye	16	20	female	Finished stimuli\MF\Fear\mf_fear_Face05_noeyes.jpg	MF	fear	yes	nm	no	1	194	z	z	54	9	45
Exp V1 Meye Znoeye	16	20	female	Finished stimuli\nrR\Neutral\nrr_neutral_Face02_noeyesbottom.jpg	nr	neutral	no	bottom	no	1	317	z	z	53	8	45
Exp V1 Meye Znoeye	16	20	female	Finished stimuli\SW\Fear\sw_fear_Face06_eyesmiddle.jpg	SW	fear	no	middle	yes	1	88	m	z	53	8	45
Exp V1 Meye Znoeye	16	20	female	Finished stimuli\PF\Neutral\pf_neutral_Face03_eyesmiddle.jpg	PF	neutral	no	middle	yes	0	342	m	z	53	8	45
Exp V1 Meye Znoeye	16	20	female	Finished stimuli\PF\Neutral\pf_neutral_Face03_noeyestop.jpg	PF	neutral	no	top	no	0	375	z	z	53	8	45
Exp V1 Meye Znoeye	16	20	female	Finished stimuli\PF\Fear\pf_fear_Face03_eyesbottom.jpg	PF	fear	no	bottom	yes	1	213	m	z	53	8	45
Exp V1 Meye Znoeye	16	20	female	Finished stimuli\MO\Fear\mo_fear_Face01_noeyesbottom.jpg	MO	fear	no	bottom	no	0	618	z	z	53	8	45
Exp V1 Meye Znoeye	16	20	female	Finished stimuli\MO\Fear\mo_fear_Face01_eyesmiddle.jpg	MO	fear	no	middle	yes	1	227	m	m	53	8	45
Exp V1 Meye Znoeye	16	20	female	Finished stimuli\MF\Neutral\mf_neutral_Face05_noeyesbottom.jpg	MF	neutral	no	bottom	no	0	396	z	m	54	9	45
Exp V1 Meye Znoeye	16	20	female	Finished stimuli\WF\Neutral\wf_neutral_Face10_noeyesmiddle.jpg	WF	neutral	no	middle	no	0	279	z	z	54	9	45
Exp V1 Meye Znoeye	16	20	female	Finished stimuli\MF\Fear\mf_fear_Face05_eyestop.jpg	MF	fear	no	top	yes	1	330	m	m	53	8	45
Exp V1 Meye Znoeye	16	20	female	Finished stimuli\PE\Fear\pe_fear_Face08_noeyes.jpg	PE	fear	yes	nm	no	1	448	z	z	53	8	45
Exp V1 Meye Znoeye	16	20	female	Finished stimuli\SW\Fear\sw_fear_Face06_eyesbottom.jpg	SW	fear	no	bottom	yes	0	374	m	m	53	8	45
Exp V1 Meye Znoeye	16	20	female	Finished stimuli\JJ\Fear\jj_fear_Face04_noeyestop.jpg	JJ	fear	no	top	no	1	460	z	z	54	9	45
Exp V1 Meye Znoeye	16	20	female	Finished stimuli\WF\Fear\wf_fear_Face10_eyes.jpg	WF	fear	yes	nm	yes	1	341	m	m	53	8	45
Exp V1 Meye Znoeye	16	20	female	Finished stimuli\PE\Fear\pe_fear_Face08_noeyesmiddle.jpg	PE	fear	no	middle	no	1	309	z	z	53	8	45
Exp V1 Meye Znoeye	16	20	female	Finished stimuli\SW\Fear\sw_fear_Face06_noeyestop.jpg	SW	fear	no	top	no	1	343	z	m	53	8	45
Exp V1 Meye Znoeye	16	20	female	Finished stimuli\MO\Fear\mo_fear_Face01_noeyesmiddle.jpg	MO	fear	no	middle	no	1	424	z	z	53	8	45
Exp V1 Meye Znoeye	16	20	female	Finished stimuli\PE\Fear\pe_fear_Face08_noeyestop.jpg	PE	fear	no	top	no	1	305	z	z	53	8	45
Exp V1 Meye Znoeye	16	20	female	Finished stimuli\PE\Fear\pe_fear_Face08_noeyesbottom.jpg	PE	fear	no	bottom	no	0	425	z	z	53	8	45
Exp V1 Meye Znoeye	16	20	female	Finished stimuli\WF\Fear\wf_fear_Face10_eyesmiddle.jpg	WF	fear	no	middle	yes	1	362	m	m	54	9	45
Exp V1 Meye Znoeye	16	20	female	Finished stimuli\PF\Fear\pf_fear_Face03_noeyes.jpg	PF	fear	yes	nm	no	1	688	z	z	54	9	45
Exp V1 Meye Znoeye	16	20	female	Finished stimuli\nrR\Fear\nrr_fear_Face02_noeyes.jpg	nr	fear	yes	nm	no	1	270	z	z	54	9	45
Exp V1 Meye Znoeye	16	20	female	Finished stimuli\PE\Fear\pe_fear_Face08_eyestop.jpg	PE	fear	no	top	yes	1	441	m	m	53	8	45
Exp V1 Meye Znoeye	16	20	female	Finished stimuli\SW\Fear\sw_fear_Face06_eyes.jpg	SW	fear	yes	nm	yes	1	372	m	m	53	8	45
Exp V1 Meye Znoeye	16	20	female	Finished stimuli\nrR\Neutral\nrr_neutral_Face02_eyestop.jpg	nr	neutral	no	top	yes	0	434	m	z	53	8	45
Exp V1 Meye Znoeye	16	20	female	Finished stimuli\PF\Fear\pf_fear_Face03_eyes.jpg	PF	fear	yes	nm	yes	1	349	m	m	53	8	45
Exp V1 Meye Znoeye	16	20	female	Finished stimuli\PE\Fear\pe_fear_Face08_eyesbottom.jpg	PE	fear	no	bottom	yes	1	577	m	z	54	9	45
Exp V1 Meye Znoeye	16	20	female	Finished stimuli\nrR\Fear\nrr_fear_Face02_eyes.jpg	nr	fear	yes	nm	yes	1	401	m	m	53	8	45
Exp V1 Meye Znoeye	16	20	female	Finished stimuli\MF\Fear\mf_fear_Face05_noeyesmiddle.jpg	MF	fear	no	middle	no	1	389	z	z	54	9	45
Exp V1 Meye Znoeye	16	20	female	Finished stimuli\JJ\Neutral\jj_neutral_Face04_noeyestop.jpg	JJ	neutral	no	top	no	1	680	z	z	53	8	45
Exp V1 Meye Znoeye	16	20	female	Finished stimuli\nrR\Fear\nrr_fear_Face02_noeyesbottom.jpg	nr	fear	no	bottom	no	1	843	z	z	53	8	45
Exp V1 Meye Znoeye	16	20	female	Finished stimuli\MO\Fear\mo_fear_Face01_noeyes.jpg	MO	fear	yes	nm	no	1	273	z	z	53	8	45
Exp V1 Meye Znoeye	16	20	female	Finished stimuli\WF\Neutral\wf_neutral_Face10_eyesbottom.jpg	WF	neutral	no	bottom	yes	0	373	m	z	54	9	45
Exp V1 Meye Znoeye	16	20	female	Finished stimuli\JJ\Neutral\jj_neutral_Face04_noeyesmiddle.jpg	JJ	neutral	no	middle	no	1	498	z	z	54	9	45
Exp V1 Meye Znoeye	16	20	female	Finished stimuli\MF\Neutral\mf_neutral_Face05_eyesmiddle.jpg	MF	neutral	no	middle	yes	1	458	m	m	53	8	45
Exp V1 Meye Znoeye	16	20	female	Finished stimuli\MF\Fear\mf_fear_Face05_noeyestop.jpg	MF	fear	no	top	no	1	675	z	z	53	8	45
Exp V1 Meye Znoeye	16	20	female	Finished stimuli\MF\Fear\mf_fear_Face05_eyes.jpg	MF	fear	yes	nm	yes	1	382	m	m	53	8	45
Exp V1 Meye Znoeye	16	20	female	Finished stimuli\MF\Fear\mf_fear_Face05_eyesmiddle.jpg	MF	fear	no	middle	yes	1	623	m	m	54	9	45
Exp V1 Meye Znoeye	16	20	female	Finished stimuli\SW\Neutral\sw_neutral_Face06_eyes.jpg	SW	neutral	yes	nm	yes	1	528	m	z	54	9	45
Exp V1 Meye Znoeye	16	20	female	Finished stimuli\MF\Fear\mf_fear_Face05_eyesbottom.jpg	MF	fear	no	bottom	yes	1	358	m	m	54	9	45
Exp V1 Meye Znoeye	16	20	female	Finished stimuli\MO\Fear\mo_fear_Face01_eyesbottom.jpg	MO	fear	no	bottom	yes	1	577	m	m	54	9	45
Exp V1 Meye Znoeye	16	20	female	Finished stimuli\WF\Fear\wf_fear_Face10_noeyesbottom.jpg	WF	fear	no	bottom	no	1	586	z	z	53	8	45
Exp V1 Meye Znoeye	16	20	female	Finished stimuli\SW\Neutral\sw_neutral_Face06_noeyesbottom.jpg	SW	neutral	no	bottom	no	1	362	z	z	53	8	45
Exp V1 Meye Znoeye	16	20	female	Finished stimuli\SW\Neutral\sw_neutral_Face06_eyestop.jpg	SW	neutral	no	top	yes	1	592	m	m	53	8	45
Exp V1 Meye Znoeye	16	20	female	Finished stimuli\MO\Neutral\mo_neutral_Face01_eyes.jpg	MO	neutral	yes	nm	yes	1	348	m	z	53	8	45
Exp V1 Meye Znoeye	16	20	female	Finished stimuli\PF\Fear\pf_fear_Face03_eyestop.jpg	PF	fear	no	top	yes	1	652	m	m	53	8	45
Exp V1 Meye Znoeye	16	20	female	Finished stimuli\PF\Fear\pf_fear_Face03_noeyesbottom.jpg	PF	fear	no	bottom	no	1	778	z	z	53	8	45
Exp V1 Meye Znoeye	16	20	female	Finished stimuli\PF\Neutral\pf_neutral_Face03_eyes.jpg	PF	neutral	yes	nm	yes	1	603	m	z	53	8	45
Exp V1 Meye Znoeye	16	20	female	Finished stimuli\JJ\Neutral\jj_neutral_Face04_eyestop.jpg	JJ	neutral	no	top	yes	1	273	m	m	53	8	45
Exp V1 Meye Znoeye	16	20	female	Finished stimuli\nrR\Neutral\nrr_neutral_Face02_eyesbottom.jpg	nr	neutral	no	bottom	yes	0	260	m	z	53	8	45
Exp V1 Meye Znoeye	16	20	female	Finished stimuli\SW\Neutral\sw_neutral_Face06_noeyesmiddle.jpg	SW	neutral	no	middle	no	0	188	z	m	54	9	45
Exp V1 Meye Znoeye	16	20	female	Finished stimuli\MO\Neutral\mo_neutral_Face01_noeyestop.jpg	MO	neutral	no	top	no	1	399	z	z	53	8	45
Exp V1 Meye Znoeye	16	20	female	Finished stimuli\MO\Neutral\mo_neutral_Face01_noeyesmiddle.jpg	MO	neutral	no	middle	no	0	258	z	m	53	8	45
Exp V1 Meye Znoeye	16	20	female	Finished stimuli\WF\Fear\wf_fear_Face10_eyestop.jpg	WF	fear	no	top	yes	1	611	m	m	54	9	45
Exp V1 Meye Znoeye	16	20	female	Finished stimuli\MF\Neutral\mf_neutral_Face05_eyes.jpg	MF	neutral	yes	nm	yes	0	676	m	m	53	8	45
Exp V1 Meye Znoeye	16	20	female	Finished stimuli\WF\Neutral\wf_neutral_Face10_eyesbottom.jpg	WF	neutral	no	bottom	yes	1	583	m	m	53	8	45
Exp V1 Meye Znoeye	16	20	female	Finished stimuli\PE\Neutral\pe_neutral_Face08_noeyestop.jpg	PE	neutral	no	top	no	1	320	z	z	53	8	45
Exp V1 Meye Znoeye	16	20	female	Finished stimuli\PF\Neutral\pf_neutral_Face03_noeyestop.jpg	PF	neutral	no	top	no	0	291	z	m	53	8	45
Exp V1 Meye Znoeye	16	20	female	Finished stimuli\MF\Fear\mf_fear_Face05_noeyesmiddle.jpg	MF	fear	no	middle	no	1	241	z	z	53	8	45
Exp V1 Meye Znoeye	16	20	female	Finished stimuli\PF\Neutral\pf_neutral_Face03_noeyes.jpg	PF	neutral	yes	nm	no	1	228	z	m	53	8	45
Exp V1 Meye Znoeye	16	20	female	Finished stimuli\JJ\Neutral\jj_neutral_Face04_noeyesbottom.jpg	JJ	neutral	no	bottom	no	1	136	z	z	54	9	45
Exp V1 Meye Znoeye	16	20	female	Finished stimuli\JJ\Neutral\jj_neutral_Face04_noeyesmiddle.jpg	JJ	neutral	no	middle	no	0	256	z	m	53	8	45
Exp V1 Meye Znoeye	16	20	female	Finished stimuli\PE\Fear\pe_fear_Face08_eyes.jpg	PE	fear	yes	nm	yes	0	393	m	z	54	9	45
Exp V1 Meye Znoeye	16	20	female	Finished stimuli\WF\Fear\wf_fear_Face10_eyestop.jpg	WF	fear	no	top	yes	1	388	m	m	53	8	45
Exp V1 Meye Znoeye	16	20	female	Finished stimuli\MO\Neutral\mo_neutral_Face01_noeyestop.jpg	MO	neutral	no	top	no	1	1028	z	z	53	8	45
Exp V1 Meye Znoeye	16	20	female	Finished stimuli\SW\Fear\sw_fear_Face06_noeyesbottom.jpg	SW	fear	no	bottom	no	0	320	z	z	53	8	45
Exp V1 Meye Znoeye	16	20	female	Finished stimuli\PE\Neutral\pe_neutral_Face08_noeyesmiddle.jpg	PE	neutral	no	middle	no	1	307	z	z	53	8	45
Exp V1 Meye Znoeye	16	20	female	Finished stimuli\MF\Neutral\mf_neutral_Face05_eyestop.jpg	MF	neutral	no	top	yes	1	316	m	m	54	9	45
Exp V1 Meye Znoeye	16	20	female	Finished stimuli\JJ\Neutral\jj_neutral_Face04_eyes.jpg	JJ	neutral	yes	nm	yes	1	310	m	m	53	8	45
Exp V1 Meye Znoeye	16	20	female	Finished stimuli\PE\Neutral\pe_neutral_Face08_eyes.jpg	PE	neutral	yes	nm	yes	0	289	m	m	53	8	45
Exp V1 Meye Znoeye	16	20	female	Finished stimuli\PE\Neutral\pe_neutral_Face08_eyestop.jpg	PE	neutral	no	top	yes	1	263	m	m	53	8	45
Exp V1 Meye Znoeye	16	20	female	Finished stimuli\WF\Fear\wf_fear_Face10_eyes.jpg	WF	fear	yes	nm	yes	1	384	m	m	54	9	45
Exp V1 Meye Znoeye	16	20	female	Finished stimuli\MO\Neutral\mo_neutral_Face01_noeyes.jpg	MO	neutral	yes	nm	no	1	376	z	z	53	8	45
Exp V1 Meye Znoeye	16	20	female	Finished stimuli\MF\Neutral\mf_neutral_Face05_eyesmiddle.jpg	MF	neutral	no	middle	yes	1	297	m	m	53	8	45
Exp V1 Meye Znoeye	16	20	female	Finished stimuli\JJ\Fear\jj_fear_Face04_noeyesbottom.jpg	JJ	fear	no	bottom	no	0	441	z	z	53	8	45
Exp V1 Meye Znoeye	16	20	female	Finished stimuli\PE\Fear\pe_fear_Face08_noeyestop.jpg	PE	fear	no	top	no	1	247	z	z	53	8	45
Exp V1 Meye Znoeye	16	20	female	Finished stimuli\MO\Fear\mo_fear_Face01_eyesmiddle.jpg	MO	fear	no	middle	yes	1	565	m	z	53	8	45
Exp V1 Meye Znoeye	16	20	female	Finished stimuli\JJ\Fear\jj_fear_Face04_noeyesmiddle.jpg	JJ	fear	no	middle	no	0	371	z	z	53	8	45
Exp V1 Meye Znoeye	16	20	female	Finished stimuli\WF\Neutral\wf_neutral_Face10_noeyesmiddle.jpg	WF	neutral	no	middle	no	0	433	z	m	53	8	45
Exp V1 Meye Znoeye	16	20	female	Finished stimuli\MF\Fear\mf_fear_Face05_noeyes.jpg	MF	fear	yes	nm	no	1	253	z	z	53	8	45
Exp V1 Meye Znoeye	16	20	female	Finished stimuli\MO\Neutral\mo_neutral_Face01_eyesmiddle.jpg	MO	neutral	no	middle	yes	0	242	m	z	53	8	45
Exp V1 Meye Znoeye	16	20	female	Finished stimuli\SW\Fear\sw_fear_Face06_noeyesmiddle.jpg	SW	fear	no	middle	no	1	472	z	z	53	8	45
Exp V1 Meye Znoeye	16	20	female	Finished stimuli\PF\Neutral\pf_neutral_Face03_noeyesmiddle.jpg	PF	neutral	no	middle	no	1	388	z	z	54	9	45
Exp V1 Meye Znoeye	16	20	female	Finished stimuli\PE\Neutral\pe_neutral_Face08_eyesbottom.jpg	PE	neutral	no	bottom	yes	0	292	m	z	53	8	45
Exp V1 Meye Znoeye	16	20	female	Finished stimuli\WF\Neutral\wf_neutral_Face10_eyestop.jpg	WF	neutral	no	top	yes	0	346	m	z	53	8	45
Exp V1 Meye Znoeye	16	20	female	Finished stimuli\JJ\Fear\jj_fear_Face04_eyestop.jpg	JJ	fear	no	top	yes	1	275	m	z	54	9	45
Exp V1 Meye Znoeye	16	20	female	Finished stimuli\nrR\Fear\nrr_fear_Face02_eyesmiddle.jpg	nr	fear	no	middle	yes	1	582	m	m	54	9	45
Exp V1 Meye Znoeye	16	20	female	Finished stimuli\PE\Neutral\pe_neutral_Face08_noeyes.jpg	PE	neutral	yes	nm	no	1	398	z	m	53	8	45
Exp V1 Meye Znoeye	16	20	female	Finished stimuli\PE\Fear\pe_fear_Face08_noeyesmiddle.jpg	PE	fear	no	middle	no	0	345	z	z	54	9	45
Exp V1 Meye Znoeye	16	20	female	Finished stimuli\MF\Neutral\mf_neutral_Face05_eyesbottom.jpg	MF	neutral	no	bottom	yes	0	353	m	z	53	8	45
Exp V1 Meye Znoeye	16	20	female	Finished stimuli\WF\Fear\wf_fear_Face10_eyesmiddle.jpg	WF	fear	no	middle	yes	1	533	m	z	54	9	45
Exp V1 Meye Znoeye	16	20	female	Finished stimuli\PF\Fear\pf_fear_Face03_noeyestop.jpg	PF	fear	no	top	no	1	355	z	z	54	9	45
Exp V1 Meye Znoeye	16	20	female	Finished stimuli\SW\Neutral\sw_neutral_Face06_eyesmiddle.jpg	SW	neutral	no	middle	yes	1	838	m	m	53	8	45
Exp V1 Meye Znoeye	16	20	female	Finished stimuli\nrR\Neutral\nrr_neutral_Face02_eyes.jpg	nr	neutral	yes	nm	yes	1	529	m	z	53	8	45
Exp V1 Meye Znoeye	16	20	female	Finished stimuli\SW\Neutral\sw_neutral_Face06_eyestop.jpg	SW	neutral	no	top	yes	1	671	m	m	53	8	45
Exp V1 Meye Znoeye	16	20	female	Finished stimuli\nrR\Fear\nrr_fear_Face02_noeyes.jpg	nr	fear	yes	nm	no	1	275	z	z	54	9	45
Exp V1 Meye Znoeye	16	20	female	Finished stimuli\PE\Neutral\pe_neutral_Face08_eyesmiddle.jpg	PE	neutral	no	middle	yes	0	318	m	z	53	8	45
Exp V1 Meye Znoeye	16	20	female	Finished stimuli\nrR\Neutral\nrr_neutral_Face02_eyesmiddle.jpg	nr	neutral	no	middle	yes	1	681	m	m	53	8	45
Exp V1 Meye Znoeye	16	20	female	Finished stimuli\JJ\Neutral\jj_neutral_Face04_eyestop.jpg	JJ	neutral	no	top	yes	1	397	m	m	54	9	45
Exp V1 Meye Znoeye	16	20	female	Finished stimuli\PE\Fear\pe_fear_Face08_eyestop.jpg	PE	fear	no	top	yes	1	416	m	m	53	8	45
Exp V1 Meye Znoeye	16	20	female	Finished stimuli\MO\Fear\mo_fear_Face01_noeyestop.jpg	MO	fear	no	top	no	1	577	z	z	53	8	45
Exp V1 Meye Znoeye	16	20	female	Finished stimuli\MO\Fear\mo_fear_Face01_noeyes.jpg	MO	fear	yes	nm	no	1	361	z	z	53	8	45
Exp V1 Meye Znoeye	16	20	female	Finished stimuli\MO\Fear\mo_fear_Face01_eyestop.jpg	MO	fear	no	top	yes	1	324	m	z	53	8	45
Exp V1 Meye Znoeye	16	20	female	Finished stimuli\PF\Fear\pf_fear_Face03_noeyesbottom.jpg	PF	fear	no	bottom	no	0	570	z	z	53	8	45
Exp V1 Meye Znoeye	16	20	female	Finished stimuli\WF\Neutral\wf_neutral_Face10_noeyestop.jpg	WF	neutral	no	top	no	1	448	z	z	53	8	45
Exp V1 Meye Znoeye	16	20	female	Finished stimuli\MF\Fear\mf_fear_Face05_eyesmiddle.jpg	MF	fear	no	middle	yes	1	253	m	m	53	8	45
Exp V1 Meye Znoeye	16	20	female	Finished stimuli\JJ\Neutral\jj_neutral_Face04_eyesmiddle.jpg	JJ	neutral	no	middle	yes	1	307	m	m	53	8	45
Exp V1 Meye Znoeye	16	20	female	Finished stimuli\SW\Fear\sw_fear_Face06_eyes.jpg	SW	fear	yes	nm	yes	1	324	m	m	54	9	45
Exp V1 Meye Znoeye	16	20	female	Finished stimuli\SW\Fear\sw_fear_Face06_eyestop.jpg	SW	fear	no	top	yes	1	314	m	m	54	9	45
Exp V1 Meye Znoeye	16	20	female	Finished stimuli\nrR\Fear\nrr_fear_Face02_eyes.jpg	nr	fear	yes	nm	yes	1	309	m	m	53	8	45
Exp V1 Meye Znoeye	16	20	female	Finished stimuli\PE\Fear\pe_fear_Face08_eyesmiddle.jpg	PE	fear	no	middle	yes	1	304	m	z	53	8	45
Exp V1 Meye Znoeye	16	20	female	Finished stimuli\nrR\Neutral\nrr_neutral_Face02_noeyesbottom.jpg	nr	neutral	no	bottom	no	0	353	z	m	54	9	45
Exp V1 Meye Znoeye	16	20	female	Finished stimuli\WF\Fear\wf_fear_Face10_noeyesmiddle.jpg	WF	fear	no	middle	no	0	356	z	z	53	8	45
Exp V1 Meye Znoeye	16	20	female	Finished stimuli\MO\Neutral\mo_neutral_Face01_eyes.jpg	MO	neutral	yes	nm	yes	0	399	m	m	53	8	45
Exp V1 Meye Znoeye	16	20	female	Finished stimuli\PF\Neutral\pf_neutral_Face03_eyesbottom.jpg	PF	neutral	no	bottom	yes	0	250	m	z	53	8	45
Exp V1 Meye Znoeye	16	20	female	Finished stimuli\PE\Neutral\pe_neutral_Face08_noeyesbottom.jpg	PE	neutral	no	bottom	no	0	264	z	m	53	8	45
Exp V1 Meye Znoeye	16	20	female	Finished stimuli\SW\Neutral\sw_neutral_Face06_noeyesbottom.jpg	SW	neutral	no	bottom	no	1	321	z	z	53	8	45
Exp V1 Meye Znoeye	16	20	female	Finished stimuli\MO\Neutral\mo_neutral_Face01_noeyesmiddle.jpg	MO	neutral	no	middle	no	0	268	z	m	53	8	45
Exp V1 Meye Znoeye	16	20	female	Finished stimuli\nrR\Fear\nrr_fear_Face02_eyestop.jpg	nr	fear	no	top	yes	1	245	m	z	54	9	45
Exp V1 Meye Znoeye	16	20	female	Finished stimuli\PE\Fear\pe_fear_Face08_noeyes.jpg	PE	fear	yes	nm	no	1	827	z	z	53	8	45
Exp V1 Meye Znoeye	16	20	female	Finished stimuli\MO\Fear\mo_fear_Face01_noeyesmiddle.jpg	MO	fear	no	middle	no	1	555	z	m	53	8	45
Exp V1 Meye Znoeye	16	20	female	Finished stimuli\PF\Fear\pf_fear_Face03_eyesmiddle.jpg	PF	fear	no	middle	yes	0	431	m	m	54	9	45
Exp V1 Meye Znoeye	16	20	female	Finished stimuli\SW\Fear\sw_fear_Face06_eyesbottom.jpg	SW	fear	no	bottom	yes	1	298	m	m	53	8	45
Exp V1 Meye Znoeye	16	20	female	Finished stimuli\JJ\Fear\jj_fear_Face04_noeyestop.jpg	JJ	fear	no	top	no	1	251	z	z	53	8	45
Exp V1 Meye Znoeye	16	20	female	Finished stimuli\PF\Fear\pf_fear_Face03_noeyesmiddle.jpg	PF	fear	no	middle	no	1	383	z	z	53	8	45
Exp V1 Meye Znoeye	16	20	female	Finished stimuli\nrR\Neutral\nrr_neutral_Face02_eyestop.jpg	nr	neutral	no	top	yes	1	289	m	m	53	8	45
Exp V1 Meye Znoeye	16	20	female	Finished stimuli\nrR\Neutral\nrr_neutral_Face02_noeyesmiddle.jpg	nr	neutral	no	middle	no	1	310	z	z	54	9	45
Exp V1 Meye Znoeye	16	20	female	Finished stimuli\MO\Neutral\mo_neutral_Face01_eyestop.jpg	MO	neutral	no	top	yes	0	41	m	z	53	8	45
Exp V1 Meye Znoeye	16	20	female	Finished stimuli\SW\Fear\sw_fear_Face06_noeyestop.jpg	SW	fear	no	top	no	1	340	z	m	53	8	45
Exp V1 Meye Znoeye	16	20	female	Finished stimuli\nrR\Neutral\nrr_neutral_Face02_eyesbottom.jpg	nr	neutral	no	bottom	yes	1	485	m	m	54	9	45
Exp V1 Meye Znoeye	16	20	female	Finished stimuli\nrR\Fear\nrr_fear_Face02_noeyesmiddle.jpg	nr	fear	no	middle	no	1	267	z	z	54	9	45
Exp V1 Meye Znoeye	16	20	female	Finished stimuli\PF\Neutral\pf_neutral_Face03_eyestop.jpg	PF	neutral	no	top	yes	1	371	m	m	53	8	45
Exp V1 Meye Znoeye	16	20	female	Finished stimuli\SW\Fear\sw_fear_Face06_noeyes.jpg	SW	fear	yes	nm	no	1	281	z	z	53	8	45
Exp V1 Meye Znoeye	16	20	female	Finished stimuli\MO\Neutral\mo_neutral_Face01_noeyesbottom.jpg	MO	neutral	no	bottom	no	1	292	z	z	53	8	45
Exp V1 Meye Znoeye	16	20	female	Finished stimuli\MF\Neutral\mf_neutral_Face05_noeyesbottom.jpg	MF	neutral	no	bottom	no	1	362	z	z	53	8	45
Exp V1 Meye Znoeye	16	20	female	Finished stimuli\SW\Neutral\sw_neutral_Face06_noeyestop.jpg	SW	neutral	no	top	no	1	464	z	z	53	8	45
Exp V1 Meye Znoeye	16	20	female	Finished stimuli\MF\Fear\mf_fear_Face05_eyesbottom.jpg	MF	fear	no	bottom	yes	1	369	m	m	53	8	45
Exp V1 Meye Znoeye	16	20	female	Finished stimuli\WF\Neutral\wf_neutral_Face10_noeyesbottom.jpg	WF	neutral	no	bottom	no	1	375	z	z	54	9	45
Exp V1 Meye Znoeye	16	20	female	Finished stimuli\nrR\Fear\nrr_fear_Face02_eyesbottom.jpg	nr	fear	no	bottom	yes	0	429	m	m	54	9	45
Exp V1 Meye Znoeye	16	20	female	Finished stimuli\nrR\Fear\nrr_fear_Face02_noeyesbottom.jpg	nr	fear	no	bottom	no	1	424	z	z	53	8	45
Exp V1 Meye Znoeye	16	20	female	Finished stimuli\PF\Neutral\pf_neutral_Face03_eyesmiddle.jpg	PF	neutral	no	middle	yes	1	313	m	m	54	9	45
Exp V1 Meye Znoeye	16	20	female	Finished stimuli\WF\Fear\wf_fear_Face10_noeyes.jpg	WF	fear	yes	nm	no	1	332	z	z	53	8	45
Exp V1 Meye Znoeye	16	20	female	Finished stimuli\PF\Neutral\pf_neutral_Face03_eyes.jpg	PF	neutral	yes	nm	yes	1	354	m	m	54	9	45
Exp V1 Meye Znoeye	16	20	female	Finished stimuli\nrR\Neutral\nrr_neutral_Face02_noeyestop.jpg	nr	neutral	no	top	no	1	332	z	z	53	8	45
Exp V1 Meye Znoeye	16	20	female	Finished stimuli\PF\Fear\pf_fear_Face03_eyes.jpg	PF	fear	yes	nm	yes	1	370	m	m	53	8	45
Exp V1 Meye Znoeye	16	20	female	Finished stimuli\WF\Fear\wf_fear_Face10_eyesbottom.jpg	WF	fear	no	bottom	yes	1	456	m	m	53	8	45
Exp V1 Meye Znoeye	16	20	female	Finished stimuli\MF\Neutral\mf_neutral_Face05_noeyesmiddle.jpg	MF	neutral	no	middle	no	1	337	z	z	53	8	45
Exp V1 Meye Znoeye	16	20	female	Finished stimuli\MF\Fear\mf_fear_Face05_noeyestop.jpg	MF	fear	no	top	no	1	281	z	z	53	8	45
Exp V1 Meye Znoeye	16	20	female	Finished stimuli\JJ\Neutral\jj_neutral_Face04_noeyes.jpg	JJ	neutral	yes	nm	no	0	436	z	z	53	8	45
Exp V1 Meye Znoeye	16	20	female	Finished stimuli\PF\Fear\pf_fear_Face03_eyesbottom.jpg	PF	fear	no	bottom	yes	1	440	m	m	54	9	45
Exp V1 Meye Znoeye	16	20	female	Finished stimuli\MF\Fear\mf_fear_Face05_noeyesbottom.jpg	MF	fear	no	bottom	no	0	299	z	z	54	9	45
Exp V1 Meye Znoeye	16	20	female	Finished stimuli\PE\Fear\pe_fear_Face08_eyesbottom.jpg	PE	fear	no	bottom	yes	1	275	m	m	53	8	45
Exp V1 Meye Znoeye	16	20	female	Finished stimuli\MF\Fear\mf_fear_Face05_eyestop.jpg	MF	fear	no	top	yes	1	207	m	z	54	9	45
Exp V1 Meye Znoeye	16	20	female	Finished stimuli\JJ\Neutral\jj_neutral_Face04_eyesbottom.jpg	JJ	neutral	no	bottom	yes	1	236	m	m	53	8	45
Exp V1 Meye Znoeye	16	20	female	Finished stimuli\WF\Neutral\wf_neutral_Face10_eyes.jpg	WF	neutral	yes	nm	yes	1	248	m	z	54	9	45
Exp V1 Meye Znoeye	16	20	female	Finished stimuli\PF\Fear\pf_fear_Face03_noeyes.jpg	PF	fear	yes	nm	no	0	246	z	m	53	8	45
Exp V1 Meye Znoeye	16	20	female	Finished stimuli\JJ\Neutral\jj_neutral_Face04_noeyestop.jpg	JJ	neutral	no	top	no	0	563	z	m	53	8	45
Exp V1 Meye Znoeye	16	20	female	Finished stimuli\MO\Fear\mo_fear_Face01_eyes.jpg	MO	fear	yes	nm	yes	0	177	m	z	53	8	45
Exp V1 Meye Znoeye	16	20	female	Finished stimuli\SW\Neutral\sw_neutral_Face06_noeyes.jpg	SW	neutral	yes	nm	no	1	410	z	m	53	8	45
Exp V1 Meye Znoeye	16	20	female	Finished stimuli\SW\Neutral\sw_neutral_Face06_eyesbottom.jpg	SW	neutral	no	bottom	yes	1	312	m	z	54	9	45
Exp V1 Meye Znoeye	16	20	female	Finished stimuli\WF\Fear\wf_fear_Face10_noeyesbottom.jpg	WF	fear	no	bottom	no	1	243	z	z	53	8	45
Exp V1 Meye Znoeye	16	20	female	Finished stimuli\WF\Neutral\wf_neutral_Face10_eyesmiddle.jpg	WF	neutral	no	middle	yes	1	689	m	z	53	8	45
Exp V1 Meye Znoeye	16	20	female	Finished stimuli\JJ\Fear\jj_fear_Face04_eyes.jpg	JJ	fear	yes	nm	yes	1	190	m	m	53	8	45
Exp V1 Meye Znoeye	16	20	female	Finished stimuli\WF\Fear\wf_fear_Face10_noeyestop.jpg	WF	fear	no	top	no	1	217	z	z	53	8	45
Exp V1 Meye Znoeye	16	20	female	Finished stimuli\JJ\Fear\jj_fear_Face04_eyesmiddle.jpg	JJ	fear	no	middle	yes	1	410	m	m	54	9	45
Exp V1 Meye Znoeye	16	20	female	Finished stimuli\MF\Fear\mf_fear_Face05_eyes.jpg	MF	fear	yes	nm	yes	1	288	m	m	54	9	45
Exp V1 Meye Znoeye	16	20	female	Finished stimuli\MF\Neutral\mf_neutral_Face05_noeyestop.jpg	MF	neutral	no	top	no	1	350	z	z	53	8	45
Exp V1 Meye Znoeye	16	20	female	Finished stimuli\SW\Neutral\sw_neutral_Face06_eyes.jpg	SW	neutral	yes	nm	yes	1	641	m	m	54	9	45
Exp V1 Meye Znoeye	16	20	female	Finished stimuli\SW\Fear\sw_fear_Face06_eyesmiddle.jpg	SW	fear	no	middle	yes	1	356	m	m	53	8	45
Exp V1 Meye Znoeye	16	20	female	Finished stimuli\JJ\Fear\jj_fear_Face04_eyesbottom.jpg	JJ	fear	no	bottom	yes	1	343	m	m	53	8	45
Exp V1 Meye Znoeye	16	20	female	Finished stimuli\MO\Neutral\mo_neutral_Face01_eyesbottom.jpg	MO	neutral	no	bottom	yes	1	304	m	z	53	8	45
Exp V1 Meye Znoeye	16	20	female	Finished stimuli\MF\Neutral\mf_neutral_Face05_noeyes.jpg	MF	neutral	yes	nm	no	1	489	z	z	54	9	45
Exp V1 Meye Znoeye	16	20	female	Finished stimuli\PF\Neutral\pf_neutral_Face03_noeyesbottom.jpg	PF	neutral	no	bottom	no	1	471	z	z	54	9	45
Exp V1 Meye Znoeye	16	20	female	Finished stimuli\MO\Fear\mo_fear_Face01_eyesbottom.jpg	MO	fear	no	bottom	yes	1	458	m	z	53	8	45
Exp V1 Meye Znoeye	16	20	female	Finished stimuli\nrR\Fear\nrr_fear_Face02_noeyestop.jpg	nr	fear	no	top	no	1	339	z	z	53	8	45
Exp V1 Meye Znoeye	16	20	female	Finished stimuli\JJ\Fear\jj_fear_Face04_noeyes.jpg	JJ	fear	yes	nm	no	1	339	z	z	53	8	45
Exp V1 Meye Znoeye	16	20	female	Finished stimuli\WF\Neutral\wf_neutral_Face10_noeyes.jpg	WF	neutral	yes	nm	no	0	284	z	z	54	9	45
Exp V1 Meye Znoeye	16	20	female	Finished stimuli\PF\Fear\pf_fear_Face03_eyestop.jpg	PF	fear	no	top	yes	1	362	m	m	53	8	45
Exp V1 Meye Znoeye	16	20	female	Finished stimuli\PE\Fear\pe_fear_Face08_noeyesbottom.jpg	PE	fear	no	bottom	no	0	629	z	z	54	9	45
Exp V1 Meye Znoeye	16	20	female	Finished stimuli\nrR\Neutral\nrr_neutral_Face02_noeyes.jpg	nr	neutral	yes	nm	no	1	304	z	z	53	8	45
Exp V1 Meye Znoeye	16	20	female	Finished stimuli\SW\Neutral\sw_neutral_Face06_noeyesmiddle.jpg	SW	neutral	no	middle	no	1	361	z	z	54	9	45
Exp V1 Meye Znoeye	16	20	female	Finished stimuli\MO\Fear\mo_fear_Face01_noeyesbottom.jpg	MO	fear	no	bottom	no	1	547	z	z	53	8	45
Exp V1 Meye Znoeye	16	20	female	Finished stimuli\nrR\Neutral\nrr_neutral_Face02_noeyesmiddle.jpg	nr	neutral	no	middle	no	1	668	z	z	53	8	45
Exp V1 Meye Znoeye	16	20	female	Finished stimuli\PF\Neutral\pf_neutral_Face03_noeyes.jpg	PF	neutral	yes	nm	no	0	160	z	z	54	9	45
Exp V1 Meye Znoeye	16	20	female	Finished stimuli\JJ\Neutral\jj_neutral_Face04_noeyestop.jpg	JJ	neutral	no	top	no	1	195	z	z	54	9	45
Exp V1 Meye Znoeye	16	20	female	Finished stimuli\WF\Neutral\wf_neutral_Face10_eyesmiddle.jpg	WF	neutral	no	middle	yes	1	206	m	z	53	8	45
Exp V1 Meye Znoeye	16	20	female	Finished stimuli\PE\Neutral\pe_neutral_Face08_eyestop.jpg	PE	neutral	no	top	yes	1	500	m	m	54	9	45
Exp V1 Meye Znoeye	16	20	female	Finished stimuli\MF\Fear\mf_fear_Face05_noeyesbottom.jpg	MF	fear	no	bottom	no	1	132	z	m	53	8	45
Exp V1 Meye Znoeye	16	20	female	Finished stimuli\MO\Neutral\mo_neutral_Face01_noeyesmiddle.jpg	MO	neutral	no	middle	no	1	170	z	z	53	8	45
Exp V1 Meye Znoeye	16	20	female	Finished stimuli\JJ\Neutral\jj_neutral_Face04_noeyes.jpg	JJ	neutral	yes	nm	no	1	512	z	z	53	8	45
Exp V1 Meye Znoeye	16	20	female	Finished stimuli\MO\Fear\mo_fear_Face01_eyestop.jpg	MO	fear	no	top	yes	0	227	m	m	53	8	45
Exp V1 Meye Znoeye	16	20	female	Finished stimuli\PF\Neutral\pf_neutral_Face03_eyes.jpg	PF	neutral	yes	nm	yes	1	364	m	z	53	8	45
Exp V1 Meye Znoeye	16	20	female	Finished stimuli\SW\Neutral\sw_neutral_Face06_eyesbottom.jpg	SW	neutral	no	bottom	yes	1	642	m	m	54	9	45
Exp V1 Meye Znoeye	16	20	female	Finished stimuli\PE\Fear\pe_fear_Face08_noeyes.jpg	PE	fear	yes	nm	no	1	336	z	z	53	8	45
Exp V1 Meye Znoeye	16	20	female	Finished stimuli\MF\Neutral\mf_neutral_Face05_noeyestop.jpg	MF	neutral	no	top	no	1	361	z	z	53	8	45
Exp V1 Meye Znoeye	16	20	female	Finished stimuli\nrR\Neutral\nrr_neutral_Face02_noeyesbottom.jpg	nr	neutral	no	bottom	no	1	324	z	z	54	9	45
Exp V1 Meye Znoeye	16	20	female	Finished stimuli\nrR\Fear\nrr_fear_Face02_eyesmiddle.jpg	nr	fear	no	middle	yes	1	274	m	z	54	9	45
Exp V1 Meye Znoeye	16	20	female	Finished stimuli\PE\Fear\pe_fear_Face08_eyesbottom.jpg	PE	fear	no	bottom	yes	1	581	m	z	53	8	45
Exp V1 Meye Znoeye	16	20	female	Finished stimuli\WF\Neutral\wf_neutral_Face10_noeyestop.jpg	WF	neutral	no	top	no	1	582	z	z	53	8	45
Exp V1 Meye Znoeye	16	20	female	Finished stimuli\MF\Fear\mf_fear_Face05_eyesbottom.jpg	MF	fear	no	bottom	yes	0	389	m	m	53	8	45
Exp V1 Meye Znoeye	16	20	female	Finished stimuli\PF\Neutral\pf_neutral_Face03_eyestop.jpg	PF	neutral	no	top	yes	1	305	m	m	53	8	45
Exp V1 Meye Znoeye	16	20	female	Finished stimuli\JJ\Neutral\jj_neutral_Face04_noeyesmiddle.jpg	JJ	neutral	no	middle	no	1	353	z	z	53	8	45
Exp V1 Meye Znoeye	16	20	female	Finished stimuli\SW\Fear\sw_fear_Face06_noeyestop.jpg	SW	fear	no	top	no	0	412	z	z	53	8	45
Exp V1 Meye Znoeye	16	20	female	Finished stimuli\MF\Neutral\mf_neutral_Face05_eyestop.jpg	MF	neutral	no	top	yes	1	338	m	m	53	8	45
Exp V1 Meye Znoeye	16	20	female	Finished stimuli\nrR\Neutral\nrr_neutral_Face02_noeyes.jpg	nr	neutral	yes	nm	no	1	427	z	m	53	8	45
Exp V1 Meye Znoeye	16	20	female	Finished stimuli\nrR\Neutral\nrr_neutral_Face02_eyes.jpg	nr	neutral	yes	nm	yes	1	475	m	m	53	8	45
Exp V1 Meye Znoeye	16	20	female	Finished stimuli\PF\Neutral\pf_neutral_Face03_noeyestop.jpg	PF	neutral	no	top	no	1	207	z	z	54	9	45
Exp V1 Meye Znoeye	16	20	female	Finished stimuli\SW\Fear\sw_fear_Face06_eyesbottom.jpg	SW	fear	no	bottom	yes	0	405	m	z	54	9	45
Exp V1 Meye Znoeye	16	20	female	Finished stimuli\WF\Neutral\wf_neutral_Face10_noeyesmiddle.jpg	WF	neutral	no	middle	no	1	411	z	z	54	9	45
Exp V1 Meye Znoeye	16	20	female	Finished stimuli\MF\Neutral\mf_neutral_Face05_noeyes.jpg	MF	neutral	yes	nm	no	0	345	z	z	53	8	45
Exp V1 Meye Znoeye	16	20	female	Finished stimuli\WF\Neutral\wf_neutral_Face10_noeyesbottom.jpg	WF	neutral	no	bottom	no	1	441	z	z	53	8	45
Exp V1 Meye Znoeye	16	20	female	Finished stimuli\MF\Fear\mf_fear_Face05_noeyestop.jpg	MF	fear	no	top	no	0	404	z	z	53	8	45
Exp V1 Meye Znoeye	16	20	female	Finished stimuli\nrR\Fear\nrr_fear_Face02_eyestop.jpg	nr	fear	no	top	yes	0	370	m	m	53	8	45
Exp V1 Meye Znoeye	16	20	female	Finished stimuli\PE\Fear\pe_fear_Face08_eyes.jpg	PE	fear	yes	nm	yes	1	944	m	m	53	8	45
Exp V1 Meye Znoeye	16	20	female	Finished stimuli\MO\Fear\mo_fear_Face01_eyesbottom.jpg	MO	fear	no	bottom	yes	0	353	m	m	53	8	45
Exp V1 Meye Znoeye	16	20	female	Finished stimuli\WF\Neutral\wf_neutral_Face10_noeyes.jpg	WF	neutral	yes	nm	no	1	612	z	z	53	8	45
Exp V1 Meye Znoeye	16	20	female	Finished stimuli\MO\Neutral\mo_neutral_Face01_noeyesbottom.jpg	MO	neutral	no	bottom	no	1	466	z	z	53	8	45
Exp V1 Meye Znoeye	16	20	female	Finished stimuli\SW\Neutral\sw_neutral_Face06_eyesmiddle.jpg	SW	neutral	no	middle	yes	1	490	m	m	53	8	45
Exp V1 Meye Znoeye	16	20	female	Finished stimuli\MO\Neutral\mo_neutral_Face01_eyestop.jpg	MO	neutral	no	top	yes	1	304	m	m	53	8	45
Exp V1 Meye Znoeye	16	20	female	Finished stimuli\MO\Neutral\mo_neutral_Face01_eyes.jpg	MO	neutral	yes	nm	yes	0	377	m	m	54	9	45
Exp V1 Meye Znoeye	16	20	female	Finished stimuli\PF\Fear\pf_fear_Face03_noeyesmiddle.jpg	PF	fear	no	middle	no	1	369	z	m	53	8	45
Exp V1 Meye Znoeye	16	20	female	Finished stimuli\WF\Fear\wf_fear_Face10_eyesmiddle.jpg	WF	fear	no	middle	yes	1	1143	m	m	53	8	45
Exp V1 Meye Znoeye	16	20	female	Finished stimuli\SW\Fear\sw_fear_Face06_eyestop.jpg	SW	fear	no	top	yes	1	296	m	z	53	8	45
Exp V1 Meye Znoeye	16	20	female	Finished stimuli\JJ\Fear\jj_fear_Face04_noeyesbottom.jpg	JJ	fear	no	bottom	no	0	241	z	m	54	9	45
Exp V1 Meye Znoeye	16	20	female	Finished stimuli\SW\Fear\sw_fear_Face06_noeyes.jpg	SW	fear	yes	nm	no	1	316	z	z	54	9	45
Exp V1 Meye Znoeye	16	20	female	Finished stimuli\PE\Neutral\pe_neutral_Face08_eyes.jpg	PE	neutral	yes	nm	yes	1	255	m	z	53	8	45
Exp V1 Meye Znoeye	16	20	female	Finished stimuli\WF\Fear\wf_fear_Face10_eyes.jpg	WF	fear	yes	nm	yes	1	232	m	m	54	9	45
Exp V1 Meye Znoeye	16	20	female	Finished stimuli\SW\Neutral\sw_neutral_Face06_noeyesbottom.jpg	SW	neutral	no	bottom	no	0	267	z	m	54	9	45
Exp V1 Meye Znoeye	16	20	female	Finished stimuli\PE\Fear\pe_fear_Face08_noeyestop.jpg	PE	fear	no	top	no	1	387	z	m	53	8	45
Exp V1 Meye Znoeye	16	20	female	Finished stimuli\PE\Neutral\pe_neutral_Face08_noeyes.jpg	PE	neutral	yes	nm	no	1	452	z	z	53	8	45
Exp V1 Meye Znoeye	16	20	female	Finished stimuli\MO\Fear\mo_fear_Face01_eyesmiddle.jpg	MO	fear	no	middle	yes	0	338	m	m	53	8	45
Exp V1 Meye Znoeye	16	20	female	Finished stimuli\JJ\Fear\jj_fear_Face04_noeyestop.jpg	JJ	fear	no	top	no	1	402	z	m	53	8	45
Exp V1 Meye Znoeye	16	20	female	Finished stimuli\PE\Fear\pe_fear_Face08_eyestop.jpg	PE	fear	no	top	yes	1	152	m	z	53	8	45
Exp V1 Meye Znoeye	16	20	female	Finished stimuli\SW\Neutral\sw_neutral_Face06_noeyestop.jpg	SW	neutral	no	top	no	0	252	z	m	53	8	45
Exp V1 Meye Znoeye	16	20	female	Finished stimuli\PE\Neutral\pe_neutral_Face08_eyesbottom.jpg	PE	neutral	no	bottom	yes	1	297	m	m	53	8	45
Exp V1 Meye Znoeye	16	20	female	Finished stimuli\nrR\Fear\nrr_fear_Face02_noeyestop.jpg	nr	fear	no	top	no	1	314	z	z	53	8	45
Exp V1 Meye Znoeye	16	20	female	Finished stimuli\PF\Fear\pf_fear_Face03_noeyes.jpg	PF	fear	yes	nm	no	0	213	z	m	53	8	45
Exp V1 Meye Znoeye	16	20	female	Finished stimuli\SW\Neutral\sw_neutral_Face06_eyestop.jpg	SW	neutral	no	top	yes	1	282	m	z	53	8	45
Exp V1 Meye Znoeye	16	20	female	Finished stimuli\PF\Fear\pf_fear_Face03_eyes.jpg	PF	fear	yes	nm	yes	1	312	m	m	53	8	45
Exp V1 Meye Znoeye	16	20	female	Finished stimuli\MF\Fear\mf_fear_Face05_noeyesmiddle.jpg	MF	fear	no	middle	no	0	563	z	z	53	8	45
Exp V1 Meye Znoeye	16	20	female	Finished stimuli\MO\Neutral\mo_neutral_Face01_noeyes.jpg	MO	neutral	yes	nm	no	1	377	z	z	53	8	45
Exp V1 Meye Znoeye	16	20	female	Finished stimuli\MF\Neutral\mf_neutral_Face05_eyesmiddle.jpg	MF	neutral	no	middle	yes	1	290	m	m	54	9	45
Exp V1 Meye Znoeye	16	20	female	Finished stimuli\MO\Fear\mo_fear_Face01_noeyesbottom.jpg	MO	fear	no	bottom	no	1	488	z	m	54	9	45
Exp V1 Meye Znoeye	16	20	female	Finished stimuli\MO\Fear\mo_fear_Face01_noeyesmiddle.jpg	MO	fear	no	middle	no	0	222	z	z	54	9	45
Exp V1 Meye Znoeye	16	20	female	Finished stimuli\MF\Neutral\mf_neutral_Face05_noeyesmiddle.jpg	MF	neutral	no	middle	no	0	438	z	z	53	8	45
Exp V1 Meye Znoeye	16	20	female	Finished stimuli\WF\Fear\wf_fear_Face10_eyesbottom.jpg	WF	fear	no	bottom	yes	1	305	m	m	53	8	45
Exp V1 Meye Znoeye	16	20	female	Finished stimuli\MO\Fear\mo_fear_Face01_noeyestop.jpg	MO	fear	no	top	no	1	466	z	z	53	8	45
Exp V1 Meye Znoeye	16	20	female	Finished stimuli\nrR\Neutral\nrr_neutral_Face02_eyestop.jpg	nr	neutral	no	top	yes	1	299	m	m	54	9	45
Exp V1 Meye Znoeye	16	20	female	Finished stimuli\JJ\Neutral\jj_neutral_Face04_eyestop.jpg	JJ	neutral	no	top	yes	1	163	m	z	53	8	45
Exp V1 Meye Znoeye	16	20	female	Finished stimuli\SW\Neutral\sw_neutral_Face06_noeyesmiddle.jpg	SW	neutral	no	middle	no	0	121	z	m	53	8	45
Exp V1 Meye Znoeye	16	20	female	Finished stimuli\MF\Fear\mf_fear_Face05_noeyes.jpg	MF	fear	yes	nm	no	1	196	z	z	53	8	45
Exp V1 Meye Znoeye	16	20	female	Finished stimuli\JJ\Neutral\jj_neutral_Face04_eyesmiddle.jpg	JJ	neutral	no	middle	yes	1	263	m	z	53	8	45
Exp V1 Meye Znoeye	16	20	female	Finished stimuli\PF\Neutral\pf_neutral_Face03_noeyesmiddle.jpg	PF	neutral	no	middle	no	0	184	z	m	53	8	45
Exp V1 Meye Znoeye	16	20	female	Finished stimuli\MO\Neutral\mo_neutral_Face01_eyesmiddle.jpg	MO	neutral	no	middle	yes	1	256	m	z	53	8	45
Exp V1 Meye Znoeye	16	20	female	Finished stimuli\JJ\Fear\jj_fear_Face04_noeyes.jpg	JJ	fear	yes	nm	no	0	305	z	m	53	8	45
Exp V1 Meye Znoeye	16	20	female	Finished stimuli\nrR\Fear\nrr_fear_Face02_eyesbottom.jpg	nr	fear	no	bottom	yes	1	170	m	z	53	8	45
Exp V1 Meye Znoeye	16	20	female	Finished stimuli\PF\Neutral\pf_neutral_Face03_eyesbottom.jpg	PF	neutral	no	bottom	yes	1	246	m	m	53	8	45
Exp V1 Meye Znoeye	16	20	female	Finished stimuli\PE\Neutral\pe_neutral_Face08_noeyestop.jpg	PE	neutral	no	top	no	1	244	z	z	53	8	45
Exp V1 Meye Znoeye	16	20	female	Finished stimuli\MF\Fear\mf_fear_Face05_eyestop.jpg	MF	fear	no	top	yes	1	258	m	m	53	8	45
Exp V1 Meye Znoeye	16	20	female	Finished stimuli\PE\Neutral\pe_neutral_Face08_noeyesmiddle.jpg	PE	neutral	no	middle	no	1	131	z	z	54	9	45
Exp V1 Meye Znoeye	16	20	female	Finished stimuli\SW\Fear\sw_fear_Face06_eyes.jpg	SW	fear	yes	nm	yes	1	560	m	m	53	8	45
Exp V1 Meye Znoeye	16	20	female	Finished stimuli\PE\Neutral\pe_neutral_Face08_eyesmiddle.jpg	PE	neutral	no	middle	yes	1	324	m	z	54	9	45
Exp V1 Meye Znoeye	16	20	female	Finished stimuli\WF\Neutral\wf_neutral_Face10_eyes.jpg	WF	neutral	yes	nm	yes	1	226	m	m	54	9	45
Exp V1 Meye Znoeye	16	20	female	Finished stimuli\WF\Neutral\wf_neutral_Face10_eyesbottom.jpg	WF	neutral	no	bottom	yes	1	626	m	z	53	8	45
Exp V1 Meye Znoeye	16	20	female	Finished stimuli\SW\Neutral\sw_neutral_Face06_eyes.jpg	SW	neutral	yes	nm	yes	1	403	m	m	53	8	45
Exp V1 Meye Znoeye	16	20	female	Finished stimuli\PE\Neutral\pe_neutral_Face08_noeyesbottom.jpg	PE	neutral	no	bottom	no	1	305	z	z	54	9	45
Exp V1 Meye Znoeye	16	20	female	Finished stimuli\WF\Neutral\wf_neutral_Face10_eyestop.jpg	WF	neutral	no	top	yes	1	289	m	m	53	8	45
Exp V1 Meye Znoeye	16	20	female	Finished stimuli\nrR\Fear\nrr_fear_Face02_noeyesbottom.jpg	nr	fear	no	bottom	no	0	287	z	z	53	8	45
Exp V1 Meye Znoeye	16	20	female	Finished stimuli\nrR\Neutral\nrr_neutral_Face02_eyesmiddle.jpg	nr	neutral	no	middle	yes	1	333	m	m	53	8	45
Exp V1 Meye Znoeye	16	20	female	Finished stimuli\nrR\Fear\nrr_fear_Face02_noeyesmiddle.jpg	nr	fear	no	middle	no	1	299	z	z	53	8	45
Exp V1 Meye Znoeye	16	20	female	Finished stimuli\MF\Fear\mf_fear_Face05_eyesmiddle.jpg	MF	fear	no	middle	yes	1	396	m	m	54	9	45
Exp V1 Meye Znoeye	16	20	female	Finished stimuli\JJ\Fear\jj_fear_Face04_noeyesmiddle.jpg	JJ	fear	no	middle	no	1	311	z	z	53	8	45
Exp V1 Meye Znoeye	16	20	female	Finished stimuli\PF\Fear\pf_fear_Face03_noeyestop.jpg	PF	fear	no	top	no	1	354	z	z	53	8	45
Exp V1 Meye Znoeye	16	20	female	Finished stimuli\nrR\Fear\nrr_fear_Face02_eyes.jpg	nr	fear	yes	nm	yes	0	589	m	z	53	8	45
Exp V1 Meye Znoeye	16	20	female	Finished stimuli\SW\Fear\sw_fear_Face06_eyesmiddle.jpg	SW	fear	no	middle	yes	1	193	m	m	54	9	45
Exp V1 Meye Znoeye	16	20	female	Finished stimuli\MO\Neutral\mo_neutral_Face01_noeyestop.jpg	MO	neutral	no	top	no	1	332	z	z	53	8	45
Exp V1 Meye Znoeye	16	20	female	Finished stimuli\JJ\Neutral\jj_neutral_Face04_eyesbottom.jpg	JJ	neutral	no	bottom	yes	1	657	m	m	54	9	45
Exp V1 Meye Znoeye	16	20	female	Finished stimuli\JJ\Fear\jj_fear_Face04_eyestop.jpg	JJ	fear	no	top	yes	1	346	m	m	54	9	45
Exp V1 Meye Znoeye	16	20	female	Finished stimuli\WF\Fear\wf_fear_Face10_noeyes.jpg	WF	fear	yes	nm	no	1	338	z	z	53	8	45
Exp V1 Meye Znoeye	16	20	female	Finished stimuli\PF\Fear\pf_fear_Face03_eyestop.jpg	PF	fear	no	top	yes	1	347	m	m	54	9	45
Exp V1 Meye Znoeye	16	20	female	Finished stimuli\MF\Fear\mf_fear_Face05_eyes.jpg	MF	fear	yes	nm	yes	1	291	m	m	53	8	45
Exp V1 Meye Znoeye	16	20	female	Finished stimuli\MO\Fear\mo_fear_Face01_eyes.jpg	MO	fear	yes	nm	yes	1	217	m	m	53	8	45
Exp V1 Meye Znoeye	16	20	female	Finished stimuli\PE\Fear\pe_fear_Face08_eyesmiddle.jpg	PE	fear	no	middle	yes	1	290	m	m	54	9	45
Exp V1 Meye Znoeye	16	20	female	Finished stimuli\JJ\Neutral\jj_neutral_Face04_eyes.jpg	JJ	neutral	yes	nm	yes	1	280	m	m	54	9	45
Exp V1 Meye Znoeye	16	20	female	Finished stimuli\JJ\Fear\jj_fear_Face04_eyes.jpg	JJ	fear	yes	nm	yes	0	243	m	z	54	9	45
Exp V1 Meye Znoeye	16	20	female	Finished stimuli\JJ\Fear\jj_fear_Face04_eyesmiddle.jpg	JJ	fear	no	middle	yes	1	241	m	m	54	9	45
Exp V1 Meye Znoeye	16	20	female	Finished stimuli\PE\Fear\pe_fear_Face08_noeyesbottom.jpg	PE	fear	no	bottom	no	1	412	z	z	54	9	45
Exp V1 Meye Znoeye	16	20	female	Finished stimuli\SW\Neutral\sw_neutral_Face06_noeyes.jpg	SW	neutral	yes	nm	no	1	290	z	z	54	9	45
Exp V1 Meye Znoeye	16	20	female	Finished stimuli\WF\Fear\wf_fear_Face10_noeyestop.jpg	WF	fear	no	top	no	1	200	z	z	54	9	45
Exp V1 Meye Znoeye	16	20	female	Finished stimuli\PF\Neutral\pf_neutral_Face03_eyesmiddle.jpg	PF	neutral	no	middle	yes	1	403	m	m	53	8	45
Exp V1 Meye Znoeye	16	20	female	Finished stimuli\nrR\Neutral\nrr_neutral_Face02_noeyestop.jpg	nr	neutral	no	top	no	0	305	z	z	54	9	45
Exp V1 Meye Znoeye	16	20	female	Finished stimuli\PF\Fear\pf_fear_Face03_eyesmiddle.jpg	PF	fear	no	middle	yes	1	297	m	m	53	8	45
Exp V1 Meye Znoeye	16	20	female	Finished stimuli\MF\Neutral\mf_neutral_Face05_noeyesbottom.jpg	MF	neutral	no	bottom	no	0	346	z	m	53	8	45
Exp V1 Meye Znoeye	16	20	female	Finished stimuli\SW\Fear\sw_fear_Face06_noeyesmiddle.jpg	SW	fear	no	middle	no	1	251	z	z	53	8	45
Exp V1 Meye Znoeye	16	20	female	Finished stimuli\PF\Fear\pf_fear_Face03_eyesbottom.jpg	PF	fear	no	bottom	yes	1	288	m	m	53	8	45
Exp V1 Meye Znoeye	16	20	female	Finished stimuli\PF\Fear\pf_fear_Face03_noeyesbottom.jpg	PF	fear	no	bottom	no	1	262	z	z	53	8	45
Exp V1 Meye Znoeye	16	20	female	Finished stimuli\JJ\Fear\jj_fear_Face04_eyesbottom.jpg	JJ	fear	no	bottom	yes	1	182	m	m	54	9	45
Exp V1 Meye Znoeye	16	20	female	Finished stimuli\JJ\Neutral\jj_neutral_Face04_noeyesbottom.jpg	JJ	neutral	no	bottom	no	1	214	z	z	53	8	45
Exp V1 Meye Znoeye	16	20	female	Finished stimuli\MF\Neutral\mf_neutral_Face05_eyesbottom.jpg	MF	neutral	no	bottom	yes	1	236	m	m	53	8	45
Exp V1 Meye Znoeye	16	20	female	Finished stimuli\PF\Neutral\pf_neutral_Face03_noeyesbottom.jpg	PF	neutral	no	bottom	no	0	183	z	z	53	8	45
Exp V1 Meye Znoeye	16	20	female	Finished stimuli\WF\Fear\wf_fear_Face10_noeyesbottom.jpg	WF	fear	no	bottom	no	1	240	z	z	54	9	45
Exp V1 Meye Znoeye	16	20	female	Finished stimuli\WF\Fear\wf_fear_Face10_noeyesmiddle.jpg	WF	fear	no	middle	no	1	331	z	z	53	8	45
Exp V1 Meye Znoeye	16	20	female	Finished stimuli\MO\Fear\mo_fear_Face01_noeyes.jpg	MO	fear	yes	nm	no	0	257	z	m	53	8	45
Exp V1 Meye Znoeye	16	20	female	Finished stimuli\WF\Fear\wf_fear_Face10_eyestop.jpg	WF	fear	no	top	yes	1	201	m	z	53	8	45
Exp V1 Meye Znoeye	16	20	female	Finished stimuli\MF\Neutral\mf_neutral_Face05_eyes.jpg	MF	neutral	yes	nm	yes	1	485	m	m	54	9	45
Exp V1 Meye Znoeye	16	20	female	Finished stimuli\nrR\Neutral\nrr_neutral_Face02_eyesbottom.jpg	nr	neutral	no	bottom	yes	1	763	m	m	54	9	45
Exp V1 Meye Znoeye	16	20	female	Finished stimuli\nrR\Fear\nrr_fear_Face02_noeyes.jpg	nr	fear	yes	nm	no	1	337	z	z	54	9	45
Exp V1 Meye Znoeye	16	20	female	Finished stimuli\SW\Fear\sw_fear_Face06_noeyesbottom.jpg	SW	fear	no	bottom	no	1	273	z	z	53	8	45
Exp V1 Meye Znoeye	16	20	female	Finished stimuli\MO\Neutral\mo_neutral_Face01_eyesbottom.jpg	MO	neutral	no	bottom	yes	1	325	m	m	53	8	45
Exp V1 Meye Znoeye	16	20	female	Finished stimuli\PE\Fear\pe_fear_Face08_noeyesmiddle.jpg	PE	fear	no	middle	no	0	362	z	z	53	8	45
Exp V1 Meye Znoeye	2	19	female	Finished stimuli\PE\Fear\pe_fear_Face08_eyesmiddle.jpg	PE	fear	no	middle	yes	1	297	m	m	54	9	45
Exp V1 Meye Znoeye	2	19	female	Finished stimuli\MO\Neutral\mo_neutral_Face01_eyesbottom.jpg	MO	neutral	no	bottom	yes	0	551	m	z	54	9	45
Exp V1 Meye Znoeye	2	19	female	Finished stimuli\PF\Fear\pf_fear_Face03_eyes.jpg	PF	fear	yes	nm	yes	1	301	m	m	54	9	45
Exp V1 Meye Znoeye	2	19	female	Finished stimuli\PE\Fear\pe_fear_Face08_eyes.jpg	PE	fear	yes	nm	yes	1	267	m	m	53	8	45
Exp V1 Meye Znoeye	2	19	female	Finished stimuli\nrR\Fear\nrr_fear_Face02_noeyesbottom.jpg	nr	fear	no	bottom	no	1	359	z	z	53	8	45
Exp V1 Meye Znoeye	2	19	female	Finished stimuli\PF\Neutral\pf_neutral_Face03_noeyesbottom.jpg	PF	neutral	no	bottom	no	1	459	z	z	54	9	45
Exp V1 Meye Znoeye	2	19	female	Finished stimuli\PE\Fear\pe_fear_Face08_noeyestop.jpg	PE	fear	no	top	no	1	294	z	z	53	8	45
Exp V1 Meye Znoeye	2	19	female	Finished stimuli\SW\Neutral\sw_neutral_Face06_eyes.jpg	SW	neutral	yes	nm	yes	1	404	m	m	54	9	45
Exp V1 Meye Znoeye	2	19	female	Finished stimuli\MO\Neutral\mo_neutral_Face01_noeyesbottom.jpg	MO	neutral	no	bottom	no	1	386	z	z	54	9	45
Exp V1 Meye Znoeye	2	19	female	Finished stimuli\PE\Neutral\pe_neutral_Face08_noeyesmiddle.jpg	PE	neutral	no	middle	no	1	346	z	z	53	8	45
Exp V1 Meye Znoeye	2	19	female	Finished stimuli\PE\Fear\pe_fear_Face08_noeyesmiddle.jpg	PE	fear	no	middle	no	1	411	z	z	53	8	45
Exp V1 Meye Znoeye	2	19	female	Finished stimuli\SW\Neutral\sw_neutral_Face06_eyesbottom.jpg	SW	neutral	no	bottom	yes	0	417	m	z	54	9	45
Exp V1 Meye Znoeye	2	19	female	Finished stimuli\PF\Neutral\pf_neutral_Face03_noeyes.jpg	PF	neutral	yes	nm	no	0	729	z	m	53	8	45
Exp V1 Meye Znoeye	2	19	female	Finished stimuli\MF\Fear\mf_fear_Face05_noeyesbottom.jpg	MF	fear	no	bottom	no	1	344	z	z	53	8	45
Exp V1 Meye Znoeye	2	19	female	Finished stimuli\PE\Fear\pe_fear_Face08_noeyes.jpg	PE	fear	yes	nm	no	1	464	z	z	53	8	45
Exp V1 Meye Znoeye	2	19	female	Finished stimuli\SW\Fear\sw_fear_Face06_noeyes.jpg	SW	fear	yes	nm	no	1	377	z	z	54	9	45
Exp V1 Meye Znoeye	2	19	female	Finished stimuli\MF\Neutral\mf_neutral_Face05_noeyesmiddle.jpg	MF	neutral	no	middle	no	0	465	z	m	53	8	45
Exp V1 Meye Znoeye	2	19	female	Finished stimuli\nrR\Fear\nrr_fear_Face02_eyesbottom.jpg	nr	fear	no	bottom	yes	0	690	m	z	53	8	45
Exp V1 Meye Znoeye	2	19	female	Finished stimuli\nrR\Neutral\nrr_neutral_Face02_noeyes.jpg	nr	neutral	yes	nm	no	1	488	z	z	53	8	45
Exp V1 Meye Znoeye	2	19	female	Finished stimuli\MF\Neutral\mf_neutral_Face05_noeyes.jpg	MF	neutral	yes	nm	no	0	494	z	m	53	8	45
Exp V1 Meye Znoeye	2	19	female	Finished stimuli\SW\Fear\sw_fear_Face06_eyesmiddle.jpg	SW	fear	no	middle	yes	1	516	m	m	53	8	45
Exp V1 Meye Znoeye	2	19	female	Finished stimuli\nrR\Fear\nrr_fear_Face02_noeyes.jpg	nr	fear	yes	nm	no	1	383	z	z	53	8	45
Exp V1 Meye Znoeye	2	19	female	Finished stimuli\MO\Fear\mo_fear_Face01_eyesmiddle.jpg	MO	fear	no	middle	yes	1	447	m	m	53	8	45
Exp V1 Meye Znoeye	2	19	female	Finished stimuli\WF\Neutral\wf_neutral_Face10_noeyesmiddle.jpg	WF	neutral	no	middle	no	1	413	z	z	53	8	45
Exp V1 Meye Znoeye	2	19	female	Finished stimuli\MO\Fear\mo_fear_Face01_eyestop.jpg	MO	fear	no	top	yes	1	395	m	m	53	8	45
Exp V1 Meye Znoeye	2	19	female	Finished stimuli\nrR\Neutral\nrr_neutral_Face02_noeyesbottom.jpg	nr	neutral	no	bottom	no	1	334	z	z	53	8	45
Exp V1 Meye Znoeye	2	19	female	Finished stimuli\JJ\Fear\jj_fear_Face04_noeyesmiddle.jpg	JJ	fear	no	middle	no	1	335	z	z	54	9	45
Exp V1 Meye Znoeye	2	19	female	Finished stimuli\SW\Fear\sw_fear_Face06_noeyestop.jpg	SW	fear	no	top	no	0	439	z	m	53	8	45
Exp V1 Meye Znoeye	2	19	female	Finished stimuli\SW\Fear\sw_fear_Face06_noeyesmiddle.jpg	SW	fear	no	middle	no	0	395	z	m	54	9	45
Exp V1 Meye Znoeye	2	19	female	Finished stimuli\WF\Fear\wf_fear_Face10_noeyestop.jpg	WF	fear	no	top	no	1	414	z	z	54	9	45
Exp V1 Meye Znoeye	2	19	female	Finished stimuli\SW\Neutral\sw_neutral_Face06_eyestop.jpg	SW	neutral	no	top	yes	1	396	m	m	54	9	45
Exp V1 Meye Znoeye	2	19	female	Finished stimuli\SW\Neutral\sw_neutral_Face06_noeyesmiddle.jpg	SW	neutral	no	middle	no	0	343	z	m	53	8	45
Exp V1 Meye Znoeye	2	19	female	Finished stimuli\MF\Neutral\mf_neutral_Face05_eyesbottom.jpg	MF	neutral	no	bottom	yes	1	416	m	m	54	9	45
Exp V1 Meye Znoeye	2	19	female	Finished stimuli\PE\Fear\pe_fear_Face08_noeyesbottom.jpg	PE	fear	no	bottom	no	1	392	z	z	53	8	45
Exp V1 Meye Znoeye	2	19	female	Finished stimuli\JJ\Neutral\jj_neutral_Face04_noeyesmiddle.jpg	JJ	neutral	no	middle	no	0	324	z	m	53	8	45
Exp V1 Meye Znoeye	2	19	female	Finished stimuli\SW\Neutral\sw_neutral_Face06_noeyestop.jpg	SW	neutral	no	top	no	0	401	z	m	53	8	45
Exp V1 Meye Znoeye	2	19	female	Finished stimuli\MO\Fear\mo_fear_Face01_noeyesbottom.jpg	MO	fear	no	bottom	no	0	445	z	m	54	9	45
Exp V1 Meye Znoeye	2	19	female	Finished stimuli\PF\Neutral\pf_neutral_Face03_noeyestop.jpg	PF	neutral	no	top	no	0	395	z	m	54	9	45
Exp V1 Meye Znoeye	2	19	female	Finished stimuli\WF\Neutral\wf_neutral_Face10_eyesbottom.jpg	WF	neutral	no	bottom	yes	0	414	m	z	53	8	45
Exp V1 Meye Znoeye	2	19	female	Finished stimuli\MO\Fear\mo_fear_Face01_noeyes.jpg	MO	fear	yes	nm	no	1	324	z	z	53	8	45
Exp V1 Meye Znoeye	2	19	female	Finished stimuli\JJ\Fear\jj_fear_Face04_eyesbottom.jpg	JJ	fear	no	bottom	yes	1	322	m	m	54	9	45
Exp V1 Meye Znoeye	2	19	female	Finished stimuli\nrR\Fear\nrr_fear_Face02_eyesmiddle.jpg	nr	fear	no	middle	yes	1	364	m	m	53	8	45
Exp V1 Meye Znoeye	2	19	female	Finished stimuli\WF\Fear\wf_fear_Face10_eyes.jpg	WF	fear	yes	nm	yes	1	346	m	m	53	8	45
Exp V1 Meye Znoeye	2	19	female	Finished stimuli\nrR\Fear\nrr_fear_Face02_noeyestop.jpg	nr	fear	no	top	no	0	299	z	m	53	8	45
Exp V1 Meye Znoeye	2	19	female	Finished stimuli\PE\Neutral\pe_neutral_Face08_noeyes.jpg	PE	neutral	yes	nm	no	0	315	z	m	53	8	45
Exp V1 Meye Znoeye	2	19	female	Finished stimuli\PF\Fear\pf_fear_Face03_noeyes.jpg	PF	fear	yes	nm	no	0	430	z	m	53	8	45
Exp V1 Meye Znoeye	2	19	female	Finished stimuli\MO\Neutral\mo_neutral_Face01_eyestop.jpg	MO	neutral	no	top	yes	1	322	m	m	54	9	45
Exp V1 Meye Znoeye	2	19	female	Finished stimuli\MF\Fear\mf_fear_Face05_eyesmiddle.jpg	MF	fear	no	middle	yes	1	328	m	m	53	8	45
Exp V1 Meye Znoeye	2	19	female	Finished stimuli\MO\Fear\mo_fear_Face01_noeyesmiddle.jpg	MO	fear	no	middle	no	1	325	z	z	53	8	45
Exp V1 Meye Znoeye	2	19	female	Finished stimuli\MF\Fear\mf_fear_Face05_eyes.jpg	MF	fear	yes	nm	yes	1	275	m	m	53	8	45
Exp V1 Meye Znoeye	2	19	female	Finished stimuli\MO\Neutral\mo_neutral_Face01_noeyes.jpg	MO	neutral	yes	nm	no	0	391	z	m	53	8	45
Exp V1 Meye Znoeye	2	19	female	Finished stimuli\JJ\Neutral\jj_neutral_Face04_noeyesbottom.jpg	JJ	neutral	no	bottom	no	0	378	z	m	54	9	45
Exp V1 Meye Znoeye	2	19	female	Finished stimuli\MO\Neutral\mo_neutral_Face01_noeyestop.jpg	MO	neutral	no	top	no	0	306	z	m	53	8	45
Exp V1 Meye Znoeye	2	19	female	Finished stimuli\JJ\Fear\jj_fear_Face04_eyesmiddle.jpg	JJ	fear	no	middle	yes	1	291	m	m	53	8	45
Exp V1 Meye Znoeye	2	19	female	Finished stimuli\MF\Fear\mf_fear_Face05_noeyesmiddle.jpg	MF	fear	no	middle	no	1	497	z	z	54	9	45
Exp V1 Meye Znoeye	2	19	female	Finished stimuli\nrR\Neutral\nrr_neutral_Face02_eyes.jpg	nr	neutral	yes	nm	yes	1	362	m	m	53	8	45
Exp V1 Meye Znoeye	2	19	female	Finished stimuli\PF\Neutral\pf_neutral_Face03_eyes.jpg	PF	neutral	yes	nm	yes	1	381	m	m	54	9	45
Exp V1 Meye Znoeye	2	19	female	Finished stimuli\PE\Fear\pe_fear_Face08_eyesbottom.jpg	PE	fear	no	bottom	yes	0	389	m	z	53	8	45
Exp V1 Meye Znoeye	2	19	female	Finished stimuli\PF\Neutral\pf_neutral_Face03_noeyesmiddle.jpg	PF	neutral	no	middle	no	0	361	z	m	54	9	45
Exp V1 Meye Znoeye	2	19	female	Finished stimuli\nrR\Neutral\nrr_neutral_Face02_noeyesmiddle.jpg	nr	neutral	no	middle	no	0	460	z	m	54	9	45
Exp V1 Meye Znoeye	2	19	female	Finished stimuli\PE\Fear\pe_fear_Face08_eyestop.jpg	PE	fear	no	top	yes	0	348	m	z	53	8	45
Exp V1 Meye Znoeye	2	19	female	Finished stimuli\MF\Neutral\mf_neutral_Face05_noeyestop.jpg	MF	neutral	no	top	no	1	580	z	z	53	8	45
Exp V1 Meye Znoeye	2	19	female	Finished stimuli\JJ\Fear\jj_fear_Face04_noeyes.jpg	JJ	fear	yes	nm	no	0	421	z	m	54	9	45
Exp V1 Meye Znoeye	2	19	female	Finished stimuli\nrR\Neutral\nrr_neutral_Face02_noeyestop.jpg	nr	neutral	no	top	no	0	389	z	m	53	8	45
Exp V1 Meye Znoeye	2	19	female	Finished stimuli\JJ\Fear\jj_fear_Face04_noeyestop.jpg	JJ	fear	no	top	no	0	449	z	m	54	9	45
Exp V1 Meye Znoeye	2	19	female	Finished stimuli\MF\Fear\mf_fear_Face05_noeyestop.jpg	MF	fear	no	top	no	1	327	z	z	54	9	45
Exp V1 Meye Znoeye	2	19	female	Finished stimuli\nrR\Fear\nrr_fear_Face02_noeyesmiddle.jpg	nr	fear	no	middle	no	0	437	z	m	53	8	45
Exp V1 Meye Znoeye	2	19	female	Finished stimuli\MF\Neutral\mf_neutral_Face05_eyestop.jpg	MF	neutral	no	top	yes	1	416	m	m	54	9	45
Exp V1 Meye Znoeye	2	19	female	Finished stimuli\PF\Neutral\pf_neutral_Face03_eyesmiddle.jpg	PF	neutral	no	middle	yes	1	408	m	m	53	8	45
Exp V1 Meye Znoeye	2	19	female	Finished stimuli\WF\Fear\wf_fear_Face10_noeyes.jpg	WF	fear	yes	nm	no	1	374	z	z	53	8	45
Exp V1 Meye Znoeye	2	19	female	Finished stimuli\MO\Neutral\mo_neutral_Face01_eyes.jpg	MO	neutral	yes	nm	yes	1	372	m	m	53	8	45
Exp V1 Meye Znoeye	2	19	female	Finished stimuli\SW\Fear\sw_fear_Face06_eyesbottom.jpg	SW	fear	no	bottom	yes	1	330	m	m	53	8	45
Exp V1 Meye Znoeye	2	19	female	Finished stimuli\PF\Fear\pf_fear_Face03_noeyestop.jpg	PF	fear	no	top	no	1	424	z	z	53	8	45
Exp V1 Meye Znoeye	2	19	female	Finished stimuli\MO\Neutral\mo_neutral_Face01_noeyesmiddle.jpg	MO	neutral	no	middle	no	0	353	z	m	54	9	45
Exp V1 Meye Znoeye	2	19	female	Finished stimuli\PF\Fear\pf_fear_Face03_noeyesmiddle.jpg	PF	fear	no	middle	no	1	564	z	z	53	8	45
Exp V1 Meye Znoeye	2	19	female	Finished stimuli\WF\Neutral\wf_neutral_Face10_noeyes.jpg	WF	neutral	yes	nm	no	1	554	z	z	53	8	45
Exp V1 Meye Znoeye	2	19	female	Finished stimuli\WF\Neutral\wf_neutral_Face10_eyes.jpg	WF	neutral	yes	nm	yes	1	381	m	m	53	8	45
Exp V1 Meye Znoeye	2	19	female	Finished stimuli\MF\Neutral\mf_neutral_Face05_eyesmiddle.jpg	MF	neutral	no	middle	yes	1	414	m	m	53	8	45
Exp V1 Meye Znoeye	2	19	female	Finished stimuli\JJ\Neutral\jj_neutral_Face04_eyes.jpg	JJ	neutral	yes	nm	yes	1	371	m	m	53	8	45
Exp V1 Meye Znoeye	2	19	female	Finished stimuli\WF\Fear\wf_fear_Face10_eyesbottom.jpg	WF	fear	no	bottom	yes	0	489	m	z	54	9	45
Exp V1 Meye Znoeye	2	19	female	Finished stimuli\nrR\Neutral\nrr_neutral_Face02_eyestop.jpg	nr	neutral	no	top	yes	1	567	m	m	54	9	45
Exp V1 Meye Znoeye	2	19	female	Finished stimuli\JJ\Fear\jj_fear_Face04_noeyesbottom.jpg	JJ	fear	no	bottom	no	1	429	z	z	54	9	45
Exp V1 Meye Znoeye	2	19	female	Finished stimuli\WF\Neutral\wf_neutral_Face10_noeyestop.jpg	WF	neutral	no	top	no	0	384	z	m	53	8	45
Exp V1 Meye Znoeye	2	19	female	Finished stimuli\SW\Neutral\sw_neutral_Face06_eyesmiddle.jpg	SW	neutral	no	middle	yes	1	377	m	m	54	9	45
Exp V1 Meye Znoeye	2	19	female	Finished stimuli\MF\Neutral\mf_neutral_Face05_noeyesbottom.jpg	MF	neutral	no	bottom	no	1	305	z	z	53	8	45
Exp V1 Meye Znoeye	2	19	female	Finished stimuli\PE\Neutral\pe_neutral_Face08_noeyesbottom.jpg	PE	neutral	no	bottom	no	0	314	z	m	54	9	45
Exp V1 Meye Znoeye	2	19	female	Finished stimuli\SW\Fear\sw_fear_Face06_noeyesbottom.jpg	SW	fear	no	bottom	no	1	317	z	z	53	8	45
Exp V1 Meye Znoeye	2	19	female	Finished stimuli\PE\Neutral\pe_neutral_Face08_eyesbottom.jpg	PE	neutral	no	bottom	yes	1	600	m	m	53	8	45
Exp V1 Meye Znoeye	2	19	female	Finished stimuli\PF\Fear\pf_fear_Face03_eyestop.jpg	PF	fear	no	top	yes	1	340	m	m	54	9	45
Exp V1 Meye Znoeye	2	19	female	Finished stimuli\MF\Neutral\mf_neutral_Face05_eyes.jpg	MF	neutral	yes	nm	yes	1	356	m	m	53	8	45
Exp V1 Meye Znoeye	2	19	female	Finished stimuli\MO\Fear\mo_fear_Face01_eyesbottom.jpg	MO	fear	no	bottom	yes	0	440	m	z	53	8	45
Exp V1 Meye Znoeye	2	19	female	Finished stimuli\PF\Neutral\pf_neutral_Face03_eyesbottom.jpg	PF	neutral	no	bottom	yes	1	467	m	m	54	9	45
Exp V1 Meye Znoeye	2	19	female	Finished stimuli\PE\Neutral\pe_neutral_Face08_noeyestop.jpg	PE	neutral	no	top	no	1	379	z	z	53	8	45
Exp V1 Meye Znoeye	2	19	female	Finished stimuli\SW\Fear\sw_fear_Face06_eyes.jpg	SW	fear	yes	nm	yes	1	340	m	m	53	8	45
Exp V1 Meye Znoeye	2	19	female	Finished stimuli\nrR\Neutral\nrr_neutral_Face02_eyesbottom.jpg	nr	neutral	no	bottom	yes	0	357	m	z	54	9	45
Exp V1 Meye Znoeye	2	19	female	Finished stimuli\JJ\Fear\jj_fear_Face04_eyestop.jpg	JJ	fear	no	top	yes	1	352	m	m	53	8	45
Exp V1 Meye Znoeye	2	19	female	Finished stimuli\JJ\Neutral\jj_neutral_Face04_noeyestop.jpg	JJ	neutral	no	top	no	0	387	z	m	53	8	45
Exp V1 Meye Znoeye	2	19	female	Finished stimuli\PE\Neutral\pe_neutral_Face08_eyesmiddle.jpg	PE	neutral	no	middle	yes	1	427	m	m	54	9	45
Exp V1 Meye Znoeye	2	19	female	Finished stimuli\MF\Fear\mf_fear_Face05_eyesbottom.jpg	MF	fear	no	bottom	yes	1	339	m	m	53	8	45
Exp V1 Meye Znoeye	2	19	female	Finished stimuli\JJ\Neutral\jj_neutral_Face04_eyesbottom.jpg	JJ	neutral	no	bottom	yes	1	348	m	m	53	8	45
Exp V1 Meye Znoeye	2	19	female	Finished stimuli\SW\Neutral\sw_neutral_Face06_noeyesbottom.jpg	SW	neutral	no	bottom	no	0	343	z	m	53	8	45
Exp V1 Meye Znoeye	2	19	female	Finished stimuli\WF\Fear\wf_fear_Face10_eyestop.jpg	WF	fear	no	top	yes	1	384	m	m	54	9	45
Exp V1 Meye Znoeye	2	19	female	Finished stimuli\PF\Fear\pf_fear_Face03_noeyesbottom.jpg	PF	fear	no	bottom	no	1	312	z	z	53	8	45
Exp V1 Meye Znoeye	2	19	female	Finished stimuli\JJ\Fear\jj_fear_Face04_eyes.jpg	JJ	fear	yes	nm	yes	1	372	m	m	54	9	45
Exp V1 Meye Znoeye	2	19	female	Finished stimuli\MO\Neutral\mo_neutral_Face01_eyesmiddle.jpg	MO	neutral	no	middle	yes	1	402	m	m	53	8	45
Exp V1 Meye Znoeye	2	19	female	Finished stimuli\SW\Neutral\sw_neutral_Face06_noeyes.jpg	SW	neutral	yes	nm	no	1	359	z	z	53	8	45
Exp V1 Meye Znoeye	2	19	female	Finished stimuli\WF\Fear\wf_fear_Face10_eyesmiddle.jpg	WF	fear	no	middle	yes	1	539	m	m	54	9	45
Exp V1 Meye Znoeye	2	19	female	Finished stimuli\MO\Fear\mo_fear_Face01_noeyestop.jpg	MO	fear	no	top	no	1	435	z	z	53	8	45
Exp V1 Meye Znoeye	2	19	female	Finished stimuli\JJ\Neutral\jj_neutral_Face04_noeyes.jpg	JJ	neutral	yes	nm	no	1	631	z	z	54	9	45
Exp V1 Meye Znoeye	2	19	female	Finished stimuli\PE\Neutral\pe_neutral_Face08_eyes.jpg	PE	neutral	yes	nm	yes	1	354	m	m	53	8	45
Exp V1 Meye Znoeye	2	19	female	Finished stimuli\WF\Fear\wf_fear_Face10_noeyesmiddle.jpg	WF	fear	no	middle	no	1	373	z	z	53	8	45
Exp V1 Meye Znoeye	2	19	female	Finished stimuli\nrR\Fear\nrr_fear_Face02_eyestop.jpg	nr	fear	no	top	yes	1	363	m	m	53	8	45
Exp V1 Meye Znoeye	2	19	female	Finished stimuli\nrR\Fear\nrr_fear_Face02_eyes.jpg	nr	fear	yes	nm	yes	1	345	m	m	53	8	45
Exp V1 Meye Znoeye	2	19	female	Finished stimuli\JJ\Neutral\jj_neutral_Face04_eyesmiddle.jpg	JJ	neutral	no	middle	yes	0	402	m	z	54	9	45
Exp V1 Meye Znoeye	2	19	female	Finished stimuli\PF\Neutral\pf_neutral_Face03_eyestop.jpg	PF	neutral	no	top	yes	1	405	m	m	53	8	45
Exp V1 Meye Znoeye	2	19	female	Finished stimuli\MF\Fear\mf_fear_Face05_eyestop.jpg	MF	fear	no	top	yes	1	466	m	m	53	8	45
Exp V1 Meye Znoeye	2	19	female	Finished stimuli\JJ\Neutral\jj_neutral_Face04_eyestop.jpg	JJ	neutral	no	top	yes	1	347	m	m	54	9	45
Exp V1 Meye Znoeye	2	19	female	Finished stimuli\MF\Fear\mf_fear_Face05_noeyes.jpg	MF	fear	yes	nm	no	1	443	z	z	53	8	45
Exp V1 Meye Znoeye	2	19	female	Finished stimuli\WF\Fear\wf_fear_Face10_noeyesbottom.jpg	WF	fear	no	bottom	no	1	449	z	z	53	8	45
Exp V1 Meye Znoeye	2	19	female	Finished stimuli\WF\Neutral\wf_neutral_Face10_eyesmiddle.jpg	WF	neutral	no	middle	yes	1	543	m	m	53	8	45
Exp V1 Meye Znoeye	2	19	female	Finished stimuli\PF\Fear\pf_fear_Face03_eyesbottom.jpg	PF	fear	no	bottom	yes	1	408	m	m	54	9	45
Exp V1 Meye Znoeye	2	19	female	Finished stimuli\PF\Fear\pf_fear_Face03_eyesmiddle.jpg	PF	fear	no	middle	yes	1	518	m	m	54	9	45
Exp V1 Meye Znoeye	2	19	female	Finished stimuli\nrR\Neutral\nrr_neutral_Face02_eyesmiddle.jpg	nr	neutral	no	middle	yes	1	401	m	m	53	8	45
Exp V1 Meye Znoeye	2	19	female	Finished stimuli\SW\Fear\sw_fear_Face06_eyestop.jpg	SW	fear	no	top	yes	1	460	m	m	53	8	45
Exp V1 Meye Znoeye	2	19	female	Finished stimuli\WF\Neutral\wf_neutral_Face10_eyestop.jpg	WF	neutral	no	top	yes	1	341	m	m	53	8	45
Exp V1 Meye Znoeye	2	19	female	Finished stimuli\WF\Neutral\wf_neutral_Face10_noeyesbottom.jpg	WF	neutral	no	bottom	no	0	390	z	m	53	8	45
Exp V1 Meye Znoeye	2	19	female	Finished stimuli\MO\Fear\mo_fear_Face01_eyes.jpg	MO	fear	yes	nm	yes	1	345	m	m	54	9	45
Exp V1 Meye Znoeye	2	19	female	Finished stimuli\PE\Neutral\pe_neutral_Face08_eyestop.jpg	PE	neutral	no	top	yes	1	297	m	m	53	8	45
Exp V1 Meye Znoeye	2	19	female	Finished stimuli\WF\Neutral\wf_neutral_Face10_eyes.jpg	WF	neutral	yes	nm	yes	1	688	m	m	53	8	45
Exp V1 Meye Znoeye	2	19	female	Finished stimuli\MF\Fear\mf_fear_Face05_eyes.jpg	MF	fear	yes	nm	yes	1	222	m	m	53	8	45
Exp V1 Meye Znoeye	2	19	female	Finished stimuli\WF\Fear\wf_fear_Face10_noeyestop.jpg	WF	fear	no	top	no	0	383	z	m	54	9	45
Exp V1 Meye Znoeye	2	19	female	Finished stimuli\PF\Fear\pf_fear_Face03_eyestop.jpg	PF	fear	no	top	yes	1	343	m	m	53	8	45
Exp V1 Meye Znoeye	2	19	female	Finished stimuli\nrR\Neutral\nrr_neutral_Face02_eyesbottom.jpg	nr	neutral	no	bottom	yes	1	408	m	m	54	9	45
Exp V1 Meye Znoeye	2	19	female	Finished stimuli\MO\Fear\mo_fear_Face01_noeyestop.jpg	MO	fear	no	top	no	1	334	z	z	54	9	45
Exp V1 Meye Znoeye	2	19	female	Finished stimuli\SW\Fear\sw_fear_Face06_noeyestop.jpg	SW	fear	no	top	no	0	372	z	m	54	9	45
Exp V1 Meye Znoeye	2	19	female	Finished stimuli\MO\Fear\mo_fear_Face01_eyestop.jpg	MO	fear	no	top	yes	1	330	m	m	54	9	45
Exp V1 Meye Znoeye	2	19	female	Finished stimuli\MO\Fear\mo_fear_Face01_noeyes.jpg	MO	fear	yes	nm	no	1	288	z	z	53	8	45
Exp V1 Meye Znoeye	2	19	female	Finished stimuli\MO\Neutral\mo_neutral_Face01_eyestop.jpg	MO	neutral	no	top	yes	1	349	m	m	53	8	45
Exp V1 Meye Znoeye	2	19	female	Finished stimuli\MF\Neutral\mf_neutral_Face05_eyes.jpg	MF	neutral	yes	nm	yes	1	473	m	m	54	9	45
Exp V1 Meye Znoeye	2	19	female	Finished stimuli\nrR\Fear\nrr_fear_Face02_eyesmiddle.jpg	nr	fear	no	middle	yes	1	404	m	m	53	8	45
Exp V1 Meye Znoeye	2	19	female	Finished stimuli\MO\Fear\mo_fear_Face01_noeyesmiddle.jpg	MO	fear	no	middle	no	1	794	z	z	53	8	45
Exp V1 Meye Znoeye	2	19	female	Finished stimuli\PF\Neutral\pf_neutral_Face03_eyestop.jpg	PF	neutral	no	top	yes	1	389	m	m	53	8	45
Exp V1 Meye Znoeye	2	19	female	Finished stimuli\PE\Fear\pe_fear_Face08_noeyestop.jpg	PE	fear	no	top	no	0	281	z	m	54	9	45
Exp V1 Meye Znoeye	2	19	female	Finished stimuli\MF\Neutral\mf_neutral_Face05_eyesbottom.jpg	MF	neutral	no	bottom	yes	1	452	m	m	54	9	45
Exp V1 Meye Znoeye	2	19	female	Finished stimuli\PF\Fear\pf_fear_Face03_noeyesbottom.jpg	PF	fear	no	bottom	no	1	362	z	z	54	9	45
Exp V1 Meye Znoeye	2	19	female	Finished stimuli\SW\Neutral\sw_neutral_Face06_eyesmiddle.jpg	SW	neutral	no	middle	yes	1	404	m	m	53	8	45
Exp V1 Meye Znoeye	2	19	female	Finished stimuli\WF\Neutral\wf_neutral_Face10_eyesbottom.jpg	WF	neutral	no	bottom	yes	0	370	m	z	53	8	45
Exp V1 Meye Znoeye	2	19	female	Finished stimuli\MF\Fear\mf_fear_Face05_eyestop.jpg	MF	fear	no	top	yes	1	352	m	m	53	8	45
Exp V1 Meye Znoeye	2	19	female	Finished stimuli\SW\Neutral\sw_neutral_Face06_eyestop.jpg	SW	neutral	no	top	yes	1	475	m	m	53	8	45
Exp V1 Meye Znoeye	2	19	female	Finished stimuli\PE\Neutral\pe_neutral_Face08_eyesbottom.jpg	PE	neutral	no	bottom	yes	0	383	m	z	53	8	45
Exp V1 Meye Znoeye	2	19	female	Finished stimuli\JJ\Neutral\jj_neutral_Face04_noeyestop.jpg	JJ	neutral	no	top	no	1	455	z	z	53	8	45
Exp V1 Meye Znoeye	2	19	female	Finished stimuli\SW\Fear\sw_fear_Face06_eyesbottom.jpg	SW	fear	no	bottom	yes	0	344	m	z	54	9	45
Exp V1 Meye Znoeye	2	19	female	Finished stimuli\PE\Neutral\pe_neutral_Face08_eyestop.jpg	PE	neutral	no	top	yes	1	328	m	m	53	8	45
Exp V1 Meye Znoeye	2	19	female	Finished stimuli\PE\Fear\pe_fear_Face08_noeyesbottom.jpg	PE	fear	no	bottom	no	1	406	z	z	53	8	45
Exp V1 Meye Znoeye	2	19	female	Finished stimuli\WF\Fear\wf_fear_Face10_eyes.jpg	WF	fear	yes	nm	yes	1	300	m	m	53	8	45
Exp V1 Meye Znoeye	2	19	female	Finished stimuli\nrR\Fear\nrr_fear_Face02_noeyesbottom.jpg	nr	fear	no	bottom	no	1	461	z	z	54	9	45
Exp V1 Meye Znoeye	2	19	female	Finished stimuli\nrR\Neutral\nrr_neutral_Face02_noeyesbottom.jpg	nr	neutral	no	bottom	no	0	365	z	m	53	8	45
Exp V1 Meye Znoeye	2	19	female	Finished stimuli\MO\Fear\mo_fear_Face01_noeyesbottom.jpg	MO	fear	no	bottom	no	1	571	z	z	53	8	45
Exp V1 Meye Znoeye	2	19	female	Finished stimuli\WF\Fear\wf_fear_Face10_eyesbottom.jpg	WF	fear	no	bottom	yes	0	393	m	z	53	8	45
Exp V1 Meye Znoeye	2	19	female	Finished stimuli\MF\Neutral\mf_neutral_Face05_noeyes.jpg	MF	neutral	yes	nm	no	1	477	z	z	53	8	45
Exp V1 Meye Znoeye	2	19	female	Finished stimuli\SW\Fear\sw_fear_Face06_noeyesbottom.jpg	SW	fear	no	bottom	no	1	368	z	z	53	8	45
Exp V1 Meye Znoeye	2	19	female	Finished stimuli\JJ\Fear\jj_fear_Face04_eyesmiddle.jpg	JJ	fear	no	middle	yes	1	326	m	m	54	9	45
Exp V1 Meye Znoeye	2	19	female	Finished stimuli\MO\Fear\mo_fear_Face01_eyesbottom.jpg	MO	fear	no	bottom	yes	0	403	m	z	54	9	45
Exp V1 Meye Znoeye	2	19	female	Finished stimuli\JJ\Fear\jj_fear_Face04_noeyesbottom.jpg	JJ	fear	no	bottom	no	1	385	z	z	54	9	45
Exp V1 Meye Znoeye	2	19	female	Finished stimuli\SW\Fear\sw_fear_Face06_eyestop.jpg	SW	fear	no	top	yes	1	385	m	m	53	8	45
Exp V1 Meye Znoeye	2	19	female	Finished stimuli\MO\Fear\mo_fear_Face01_eyesmiddle.jpg	MO	fear	no	middle	yes	1	306	m	m	54	9	45
Exp V1 Meye Znoeye	2	19	female	Finished stimuli\SW\Fear\sw_fear_Face06_noeyesmiddle.jpg	SW	fear	no	middle	no	1	346	z	z	53	8	45
Exp V1 Meye Znoeye	2	19	female	Finished stimuli\nrR\Fear\nrr_fear_Face02_noeyestop.jpg	nr	fear	no	top	no	1	331	z	z	53	8	45
Exp V1 Meye Znoeye	2	19	female	Finished stimuli\MO\Neutral\mo_neutral_Face01_noeyes.jpg	MO	neutral	yes	nm	no	1	425	z	z	53	8	45
Exp V1 Meye Znoeye	2	19	female	Finished stimuli\JJ\Neutral\jj_neutral_Face04_eyestop.jpg	JJ	neutral	no	top	yes	1	266	m	m	53	8	45
Exp V1 Meye Znoeye	2	19	female	Finished stimuli\SW\Neutral\sw_neutral_Face06_noeyestop.jpg	SW	neutral	no	top	no	1	482	z	z	53	8	45
Exp V1 Meye Znoeye	2	19	female	Finished stimuli\nrR\Neutral\nrr_neutral_Face02_noeyes.jpg	nr	neutral	yes	nm	no	1	320	z	z	53	8	45
Exp V1 Meye Znoeye	2	19	female	Finished stimuli\JJ\Fear\jj_fear_Face04_noeyestop.jpg	JJ	fear	no	top	no	1	627	z	z	53	8	45
Exp V1 Meye Znoeye	2	19	female	Finished stimuli\SW\Neutral\sw_neutral_Face06_eyes.jpg	SW	neutral	yes	nm	yes	1	364	m	m	53	8	45
Exp V1 Meye Znoeye	2	19	female	Finished stimuli\MO\Fear\mo_fear_Face01_eyes.jpg	MO	fear	yes	nm	yes	1	354	m	m	53	8	45
Exp V1 Meye Znoeye	2	19	female	Finished stimuli\SW\Neutral\sw_neutral_Face06_noeyes.jpg	SW	neutral	yes	nm	no	0	437	z	m	53	8	45
Exp V1 Meye Znoeye	2	19	female	Finished stimuli\JJ\Fear\jj_fear_Face04_eyesbottom.jpg	JJ	fear	no	bottom	yes	0	288	m	z	53	8	45
Exp V1 Meye Znoeye	2	19	female	Finished stimuli\JJ\Neutral\jj_neutral_Face04_noeyes.jpg	JJ	neutral	yes	nm	no	1	438	z	z	53	8	45
Exp V1 Meye Znoeye	2	19	female	Finished stimuli\PF\Neutral\pf_neutral_Face03_noeyesbottom.jpg	PF	neutral	no	bottom	no	1	362	z	z	54	9	45
Exp V1 Meye Znoeye	2	19	female	Finished stimuli\nrR\Fear\nrr_fear_Face02_eyestop.jpg	nr	fear	no	top	yes	1	365	m	m	54	9	45
Exp V1 Meye Znoeye	2	19	female	Finished stimuli\PF\Neutral\pf_neutral_Face03_eyes.jpg	PF	neutral	yes	nm	yes	1	331	m	m	54	9	45
Exp V1 Meye Znoeye	2	19	female	Finished stimuli\WF\Neutral\wf_neutral_Face10_noeyesmiddle.jpg	WF	neutral	no	middle	no	1	649	z	z	54	9	45
Exp V1 Meye Znoeye	2	19	female	Finished stimuli\PE\Fear\pe_fear_Face08_eyes.jpg	PE	fear	yes	nm	yes	1	478	m	m	54	9	45
Exp V1 Meye Znoeye	2	19	female	Finished stimuli\PF\Neutral\pf_neutral_Face03_noeyesmiddle.jpg	PF	neutral	no	middle	no	1	409	z	z	53	8	45
Exp V1 Meye Znoeye	2	19	female	Finished stimuli\MO\Neutral\mo_neutral_Face01_eyesbottom.jpg	MO	neutral	no	bottom	yes	0	343	m	z	53	8	45
Exp V1 Meye Znoeye	2	19	female	Finished stimuli\SW\Neutral\sw_neutral_Face06_noeyesmiddle.jpg	SW	neutral	no	middle	no	0	928	z	m	54	9	45
Exp V1 Meye Znoeye	2	19	female	Finished stimuli\JJ\Fear\jj_fear_Face04_eyes.jpg	JJ	fear	yes	nm	yes	1	430	m	m	54	9	45
Exp V1 Meye Znoeye	2	19	female	Finished stimuli\PF\Fear\pf_fear_Face03_eyesmiddle.jpg	PF	fear	no	middle	yes	0	553	m	z	53	8	45
Exp V1 Meye Znoeye	2	19	female	Finished stimuli\PE\Fear\pe_fear_Face08_noeyesmiddle.jpg	PE	fear	no	middle	no	0	836	z	m	53	8	45
Exp V1 Meye Znoeye	2	19	female	Finished stimuli\SW\Neutral\sw_neutral_Face06_eyesbottom.jpg	SW	neutral	no	bottom	yes	0	552	m	z	53	8	45
Exp V1 Meye Znoeye	2	19	female	Finished stimuli\MO\Neutral\mo_neutral_Face01_noeyesbottom.jpg	MO	neutral	no	bottom	no	0	379	z	m	53	8	45
Exp V1 Meye Znoeye	2	19	female	Finished stimuli\nrR\Fear\nrr_fear_Face02_eyes.jpg	nr	fear	yes	nm	yes	1	468	m	m	54	9	45
Exp V1 Meye Znoeye	2	19	female	Finished stimuli\MF\Fear\mf_fear_Face05_noeyesbottom.jpg	MF	fear	no	bottom	no	1	348	z	z	53	8	45
Exp V1 Meye Znoeye	2	19	female	Finished stimuli\SW\Neutral\sw_neutral_Face06_noeyesbottom.jpg	SW	neutral	no	bottom	no	0	416	z	m	54	9	45
Exp V1 Meye Znoeye	2	19	female	Finished stimuli\MF\Neutral\mf_neutral_Face05_noeyestop.jpg	MF	neutral	no	top	no	1	456	z	z	53	8	45
Exp V1 Meye Znoeye	2	19	female	Finished stimuli\PE\Fear\pe_fear_Face08_eyestop.jpg	PE	fear	no	top	yes	1	393	m	m	53	8	45
Exp V1 Meye Znoeye	2	19	female	Finished stimuli\MF\Neutral\mf_neutral_Face05_eyestop.jpg	MF	neutral	no	top	yes	1	324	m	m	53	8	45
Exp V1 Meye Znoeye	2	19	female	Finished stimuli\WF\Fear\wf_fear_Face10_eyesmiddle.jpg	WF	fear	no	middle	yes	1	298	m	m	53	8	45
Exp V1 Meye Znoeye	2	19	female	Finished stimuli\SW\Fear\sw_fear_Face06_eyesmiddle.jpg	SW	fear	no	middle	yes	1	291	m	m	54	9	45
Exp V1 Meye Znoeye	2	19	female	Finished stimuli\WF\Neutral\wf_neutral_Face10_noeyes.jpg	WF	neutral	yes	nm	no	1	464	z	z	54	9	45
Exp V1 Meye Znoeye	2	19	female	Finished stimuli\WF\Neutral\wf_neutral_Face10_eyesmiddle.jpg	WF	neutral	no	middle	yes	1	592	m	m	53	8	45
Exp V1 Meye Znoeye	2	19	female	Finished stimuli\PE\Neutral\pe_neutral_Face08_eyesmiddle.jpg	PE	neutral	no	middle	yes	1	732	m	m	54	9	45
Exp V1 Meye Znoeye	2	19	female	Finished stimuli\MO\Neutral\mo_neutral_Face01_noeyestop.jpg	MO	neutral	no	top	no	1	354	z	z	54	9	45
Exp V1 Meye Znoeye	2	19	female	Finished stimuli\PF\Fear\pf_fear_Face03_noeyes.jpg	PF	fear	yes	nm	no	1	493	z	z	53	8	45
Exp V1 Meye Znoeye	2	19	female	Finished stimuli\MF\Neutral\mf_neutral_Face05_noeyesmiddle.jpg	MF	neutral	no	middle	no	1	315	z	z	53	8	45
Exp V1 Meye Znoeye	2	19	female	Finished stimuli\WF\Fear\wf_fear_Face10_eyestop.jpg	WF	fear	no	top	yes	1	374	m	m	53	8	45
Exp V1 Meye Znoeye	2	19	female	Finished stimuli\MO\Neutral\mo_neutral_Face01_eyesmiddle.jpg	MO	neutral	no	middle	yes	1	540	m	m	53	8	45
Exp V1 Meye Znoeye	2	19	female	Finished stimuli\nrR\Neutral\nrr_neutral_Face02_eyestop.jpg	nr	neutral	no	top	yes	1	349	m	m	54	9	45
Exp V1 Meye Znoeye	2	19	female	Finished stimuli\SW\Fear\sw_fear_Face06_eyes.jpg	SW	fear	yes	nm	yes	1	280	m	m	53	8	45
Exp V1 Meye Znoeye	2	19	female	Finished stimuli\PE\Neutral\pe_neutral_Face08_noeyesbottom.jpg	PE	neutral	no	bottom	no	1	435	z	z	53	8	45
Exp V1 Meye Znoeye	2	19	female	Finished stimuli\PF\Neutral\pf_neutral_Face03_eyesbottom.jpg	PF	neutral	no	bottom	yes	1	495	m	m	53	8	45
Exp V1 Meye Znoeye	2	19	female	Finished stimuli\JJ\Neutral\jj_neutral_Face04_eyesbottom.jpg	JJ	neutral	no	bottom	yes	0	380	m	z	53	8	45
Exp V1 Meye Znoeye	2	19	female	Finished stimuli\PF\Fear\pf_fear_Face03_noeyesmiddle.jpg	PF	fear	no	middle	no	1	277	z	z	53	8	45
Exp V1 Meye Znoeye	2	19	female	Finished stimuli\PE\Fear\pe_fear_Face08_eyesbottom.jpg	PE	fear	no	bottom	yes	0	520	m	z	53	8	45
Exp V1 Meye Znoeye	2	19	female	Finished stimuli\MO\Neutral\mo_neutral_Face01_eyes.jpg	MO	neutral	yes	nm	yes	1	364	m	m	54	9	45
Exp V1 Meye Znoeye	2	19	female	Finished stimuli\MF\Fear\mf_fear_Face05_eyesmiddle.jpg	MF	fear	no	middle	yes	1	378	m	m	53	8	45
Exp V1 Meye Znoeye	2	19	female	Finished stimuli\WF\Neutral\wf_neutral_Face10_noeyesbottom.jpg	WF	neutral	no	bottom	no	0	370	z	m	53	8	45
Exp V1 Meye Znoeye	2	19	female	Finished stimuli\PE\Neutral\pe_neutral_Face08_noeyestop.jpg	PE	neutral	no	top	no	1	327	z	z	53	8	45
Exp V1 Meye Znoeye	2	19	female	Finished stimuli\nrR\Fear\nrr_fear_Face02_noeyes.jpg	nr	fear	yes	nm	no	1	501	z	z	53	8	45
Exp V1 Meye Znoeye	2	19	female	Finished stimuli\PF\Neutral\pf_neutral_Face03_eyesmiddle.jpg	PF	neutral	no	middle	yes	1	374	m	m	54	9	45
Exp V1 Meye Znoeye	2	19	female	Finished stimuli\PF\Fear\pf_fear_Face03_eyesbottom.jpg	PF	fear	no	bottom	yes	0	348	m	z	53	8	45
Exp V1 Meye Znoeye	2	19	female	Finished stimuli\JJ\Fear\jj_fear_Face04_eyestop.jpg	JJ	fear	no	top	yes	1	492	m	m	53	8	45
Exp V1 Meye Znoeye	2	19	female	Finished stimuli\PE\Neutral\pe_neutral_Face08_eyes.jpg	PE	neutral	yes	nm	yes	1	386	m	m	53	8	45
Exp V1 Meye Znoeye	2	19	female	Finished stimuli\JJ\Fear\jj_fear_Face04_noeyesmiddle.jpg	JJ	fear	no	middle	no	1	403	z	z	54	9	45
Exp V1 Meye Znoeye	2	19	female	Finished stimuli\MF\Neutral\mf_neutral_Face05_noeyesbottom.jpg	MF	neutral	no	bottom	no	1	425	z	z	54	9	45
Exp V1 Meye Znoeye	2	19	female	Finished stimuli\MO\Neutral\mo_neutral_Face01_noeyesmiddle.jpg	MO	neutral	no	middle	no	1	473	z	z	53	8	45
Exp V1 Meye Znoeye	2	19	female	Finished stimuli\JJ\Neutral\jj_neutral_Face04_eyes.jpg	JJ	neutral	yes	nm	yes	0	581	m	z	54	9	45
Exp V1 Meye Znoeye	2	19	female	Finished stimuli\WF\Fear\wf_fear_Face10_noeyesbottom.jpg	WF	fear	no	bottom	no	1	381	z	z	53	8	45
Exp V1 Meye Znoeye	2	19	female	Finished stimuli\WF\Neutral\wf_neutral_Face10_noeyestop.jpg	WF	neutral	no	top	no	0	350	z	m	54	9	45
Exp V1 Meye Znoeye	2	19	female	Finished stimuli\JJ\Fear\jj_fear_Face04_noeyes.jpg	JJ	fear	yes	nm	no	1	393	z	z	53	8	45
Exp V1 Meye Znoeye	2	19	female	Finished stimuli\MF\Fear\mf_fear_Face05_noeyestop.jpg	MF	fear	no	top	no	1	332	z	z	53	8	45
Exp V1 Meye Znoeye	2	19	female	Finished stimuli\JJ\Neutral\jj_neutral_Face04_eyesmiddle.jpg	JJ	neutral	no	middle	yes	1	522	m	m	53	8	45
Exp V1 Meye Znoeye	2	19	female	Finished stimuli\PE\Neutral\pe_neutral_Face08_noeyes.jpg	PE	neutral	yes	nm	no	1	312	z	z	53	8	45
Exp V1 Meye Znoeye	2	19	female	Finished stimuli\MF\Fear\mf_fear_Face05_eyesbottom.jpg	MF	fear	no	bottom	yes	1	660	m	m	53	8	45
Exp V1 Meye Znoeye	2	19	female	Finished stimuli\MF\Fear\mf_fear_Face05_noeyes.jpg	MF	fear	yes	nm	no	1	348	z	z	53	8	45
Exp V1 Meye Znoeye	2	19	female	Finished stimuli\nrR\Neutral\nrr_neutral_Face02_eyes.jpg	nr	neutral	yes	nm	yes	1	508	m	m	54	9	45
Exp V1 Meye Znoeye	2	19	female	Finished stimuli\PF\Neutral\pf_neutral_Face03_noeyestop.jpg	PF	neutral	no	top	no	1	383	z	z	53	8	45
Exp V1 Meye Znoeye	2	19	female	Finished stimuli\nrR\Neutral\nrr_neutral_Face02_noeyestop.jpg	nr	neutral	no	top	no	1	304	z	z	54	9	45
Exp V1 Meye Znoeye	2	19	female	Finished stimuli\nrR\Neutral\nrr_neutral_Face02_noeyesmiddle.jpg	nr	neutral	no	middle	no	1	392	z	z	53	8	45
Exp V1 Meye Znoeye	2	19	female	Finished stimuli\nrR\Fear\nrr_fear_Face02_eyesbottom.jpg	nr	fear	no	bottom	yes	0	300	m	z	54	9	45
Exp V1 Meye Znoeye	2	19	female	Finished stimuli\PF\Fear\pf_fear_Face03_eyes.jpg	PF	fear	yes	nm	yes	1	348	m	m	53	8	45
Exp V1 Meye Znoeye	2	19	female	Finished stimuli\WF\Neutral\wf_neutral_Face10_eyestop.jpg	WF	neutral	no	top	yes	1	383	m	m	53	8	45
Exp V1 Meye Znoeye	2	19	female	Finished stimuli\PF\Fear\pf_fear_Face03_noeyestop.jpg	PF	fear	no	top	no	1	432	z	z	53	8	45
Exp V1 Meye Znoeye	2	19	female	Finished stimuli\PE\Neutral\pe_neutral_Face08_noeyesmiddle.jpg	PE	neutral	no	middle	no	1	523	z	z	53	8	45
Exp V1 Meye Znoeye	2	19	female	Finished stimuli\nrR\Neutral\nrr_neutral_Face02_eyesmiddle.jpg	nr	neutral	no	middle	yes	1	1001	m	m	53	8	45
Exp V1 Meye Znoeye	2	19	female	Finished stimuli\JJ\Neutral\jj_neutral_Face04_noeyesmiddle.jpg	JJ	neutral	no	middle	no	0	440	z	m	53	8	45
Exp V1 Meye Znoeye	2	19	female	Finished stimuli\nrR\Fear\nrr_fear_Face02_noeyesmiddle.jpg	nr	fear	no	middle	no	1	307	z	z	54	9	45
Exp V1 Meye Znoeye	2	19	female	Finished stimuli\PE\Fear\pe_fear_Face08_eyesmiddle.jpg	PE	fear	no	middle	yes	1	339	m	m	53	8	45
Exp V1 Meye Znoeye	2	19	female	Finished stimuli\PF\Neutral\pf_neutral_Face03_noeyes.jpg	PF	neutral	yes	nm	no	1	324	z	z	53	8	45
Exp V1 Meye Znoeye	2	19	female	Finished stimuli\MF\Fear\mf_fear_Face05_noeyesmiddle.jpg	MF	fear	no	middle	no	1	322	z	z	54	9	45
Exp V1 Meye Znoeye	2	19	female	Finished stimuli\JJ\Neutral\jj_neutral_Face04_noeyesbottom.jpg	JJ	neutral	no	bottom	no	1	328	z	z	54	9	45
Exp V1 Meye Znoeye	2	19	female	Finished stimuli\PE\Fear\pe_fear_Face08_noeyes.jpg	PE	fear	yes	nm	no	1	334	z	z	54	9	45
Exp V1 Meye Znoeye	2	19	female	Finished stimuli\SW\Fear\sw_fear_Face06_noeyes.jpg	SW	fear	yes	nm	no	1	388	z	z	54	9	45
Exp V1 Meye Znoeye	2	19	female	Finished stimuli\MF\Neutral\mf_neutral_Face05_eyesmiddle.jpg	MF	neutral	no	middle	yes	1	419	m	m	53	8	45
Exp V1 Meye Znoeye	2	19	female	Finished stimuli\WF\Fear\wf_fear_Face10_noeyes.jpg	WF	fear	yes	nm	no	0	404	z	m	54	9	45
Exp V1 Meye Znoeye	2	19	female	Finished stimuli\WF\Fear\wf_fear_Face10_noeyesmiddle.jpg	WF	fear	no	middle	no	1	314	z	z	54	9	45
Exp V1 Meye Znoeye	2	19	female	Finished stimuli\WF\Neutral\wf_neutral_Face10_noeyesbottom.jpg	WF	neutral	no	bottom	no	1	531	z	z	54	9	45
Exp V1 Meye Znoeye	2	19	female	Finished stimuli\JJ\Neutral\jj_neutral_Face04_noeyesbottom.jpg	JJ	neutral	no	bottom	no	1	337	z	z	54	9	45
Exp V1 Meye Znoeye	2	19	female	Finished stimuli\WF\Fear\wf_fear_Face10_eyes.jpg	WF	fear	yes	nm	yes	1	281	m	m	53	8	45
Exp V1 Meye Znoeye	2	19	female	Finished stimuli\PF\Neutral\pf_neutral_Face03_noeyesmiddle.jpg	PF	neutral	no	middle	no	0	349	z	m	54	9	45
Exp V1 Meye Znoeye	2	19	female	Finished stimuli\WF\Fear\wf_fear_Face10_eyesbottom.jpg	WF	fear	no	bottom	yes	0	280	m	z	53	8	45
Exp V1 Meye Znoeye	2	19	female	Finished stimuli\WF\Fear\wf_fear_Face10_noeyesbottom.jpg	WF	fear	no	bottom	no	1	323	z	z	53	8	45
Exp V1 Meye Znoeye	2	19	female	Finished stimuli\MF\Neutral\mf_neutral_Face05_noeyesmiddle.jpg	MF	neutral	no	middle	no	1	305	z	z	53	8	45
Exp V1 Meye Znoeye	2	19	female	Finished stimuli\JJ\Fear\jj_fear_Face04_eyestop.jpg	JJ	fear	no	top	yes	1	362	m	m	54	9	45
Exp V1 Meye Znoeye	2	19	female	Finished stimuli\MO\Neutral\mo_neutral_Face01_eyes.jpg	MO	neutral	yes	nm	yes	1	325	m	m	54	9	45
Exp V1 Meye Znoeye	2	19	female	Finished stimuli\nrR\Fear\nrr_fear_Face02_eyesbottom.jpg	nr	fear	no	bottom	yes	0	291	m	z	54	9	45
Exp V1 Meye Znoeye	2	19	female	Finished stimuli\WF\Neutral\wf_neutral_Face10_noeyes.jpg	WF	neutral	yes	nm	no	0	313	z	m	54	9	45
Exp V1 Meye Znoeye	2	19	female	Finished stimuli\MO\Fear\mo_fear_Face01_noeyestop.jpg	MO	fear	no	top	no	1	324	z	z	54	9	45
Exp V1 Meye Znoeye	2	19	female	Finished stimuli\PE\Fear\pe_fear_Face08_eyesbottom.jpg	PE	fear	no	bottom	yes	0	289	m	z	54	9	45
Exp V1 Meye Znoeye	2	19	female	Finished stimuli\WF\Neutral\wf_neutral_Face10_noeyesmiddle.jpg	WF	neutral	no	middle	no	0	367	z	m	54	9	45
Exp V1 Meye Znoeye	2	19	female	Finished stimuli\MF\Neutral\mf_neutral_Face05_eyes.jpg	MF	neutral	yes	nm	yes	0	301	m	z	53	8	45
Exp V1 Meye Znoeye	2	19	female	Finished stimuli\JJ\Neutral\jj_neutral_Face04_eyes.jpg	JJ	neutral	yes	nm	yes	0	285	m	z	53	8	45
Exp V1 Meye Znoeye	2	19	female	Finished stimuli\JJ\Fear\jj_fear_Face04_eyesmiddle.jpg	JJ	fear	no	middle	yes	1	483	m	m	53	8	45
Exp V1 Meye Znoeye	2	19	female	Finished stimuli\WF\Neutral\wf_neutral_Face10_eyestop.jpg	WF	neutral	no	top	yes	1	393	m	m	53	8	45
Exp V1 Meye Znoeye	2	19	female	Finished stimuli\nrR\Neutral\nrr_neutral_Face02_eyes.jpg	nr	neutral	yes	nm	yes	1	388	m	m	53	8	45
Exp V1 Meye Znoeye	2	19	female	Finished stimuli\PF\Fear\pf_fear_Face03_noeyesmiddle.jpg	PF	fear	no	middle	no	0	432	z	m	53	8	45
Exp V1 Meye Znoeye	2	19	female	Finished stimuli\MO\Neutral\mo_neutral_Face01_noeyes.jpg	MO	neutral	yes	nm	no	1	347	z	z	54	9	45
Exp V1 Meye Znoeye	2	19	female	Finished stimuli\PF\Fear\pf_fear_Face03_eyesmiddle.jpg	PF	fear	no	middle	yes	1	419	m	m	53	8	45
Exp V1 Meye Znoeye	2	19	female	Finished stimuli\SW\Fear\sw_fear_Face06_noeyesbottom.jpg	SW	fear	no	bottom	no	1	300	z	z	53	8	45
Exp V1 Meye Znoeye	2	19	female	Finished stimuli\PE\Neutral\pe_neutral_Face08_eyestop.jpg	PE	neutral	no	top	yes	1	421	m	m	54	9	45
Exp V1 Meye Znoeye	2	19	female	Finished stimuli\MF\Neutral\mf_neutral_Face05_eyesmiddle.jpg	MF	neutral	no	middle	yes	1	373	m	m	53	8	45
Exp V1 Meye Znoeye	2	19	female	Finished stimuli\PF\Neutral\pf_neutral_Face03_eyesmiddle.jpg	PF	neutral	no	middle	yes	0	371	m	z	53	8	45
Exp V1 Meye Znoeye	2	19	female	Finished stimuli\MF\Neutral\mf_neutral_Face05_eyestop.jpg	MF	neutral	no	top	yes	0	689	m	z	53	8	45
Exp V1 Meye Znoeye	2	19	female	Finished stimuli\SW\Fear\sw_fear_Face06_noeyestop.jpg	SW	fear	no	top	no	1	431	z	z	53	8	45
Exp V1 Meye Znoeye	2	19	female	Finished stimuli\SW\Neutral\sw_neutral_Face06_noeyestop.jpg	SW	neutral	no	top	no	0	490	z	m	53	8	45
Exp V1 Meye Znoeye	2	19	female	Finished stimuli\SW\Neutral\sw_neutral_Face06_noeyesbottom.jpg	SW	neutral	no	bottom	no	1	735	z	z	53	8	45
Exp V1 Meye Znoeye	2	19	female	Finished stimuli\MO\Neutral\mo_neutral_Face01_noeyestop.jpg	MO	neutral	no	top	no	0	432	z	m	53	8	45
Exp V1 Meye Znoeye	2	19	female	Finished stimuli\SW\Neutral\sw_neutral_Face06_noeyesmiddle.jpg	SW	neutral	no	middle	no	1	371	z	z	53	8	45
Exp V1 Meye Znoeye	2	19	female	Finished stimuli\nrR\Fear\nrr_fear_Face02_eyesmiddle.jpg	nr	fear	no	middle	yes	1	385	m	m	53	8	45
Exp V1 Meye Znoeye	2	19	female	Finished stimuli\nrR\Fear\nrr_fear_Face02_noeyesmiddle.jpg	nr	fear	no	middle	no	1	418	z	z	53	8	45
Exp V1 Meye Znoeye	2	19	female	Finished stimuli\WF\Fear\wf_fear_Face10_eyesmiddle.jpg	WF	fear	no	middle	yes	1	347	m	m	54	9	45
Exp V1 Meye Znoeye	2	19	female	Finished stimuli\nrR\Neutral\nrr_neutral_Face02_noeyesbottom.jpg	nr	neutral	no	bottom	no	0	451	z	m	53	8	45
Exp V1 Meye Znoeye	2	19	female	Finished stimuli\JJ\Neutral\jj_neutral_Face04_noeyes.jpg	JJ	neutral	yes	nm	no	1	281	z	z	53	8	45
Exp V1 Meye Znoeye	2	19	female	Finished stimuli\nrR\Neutral\nrr_neutral_Face02_eyestop.jpg	nr	neutral	no	top	yes	1	412	m	m	53	8	45
Exp V1 Meye Znoeye	2	19	female	Finished stimuli\WF\Neutral\wf_neutral_Face10_eyesmiddle.jpg	WF	neutral	no	middle	yes	0	394	m	z	53	8	45
Exp V1 Meye Znoeye	2	19	female	Finished stimuli\nrR\Neutral\nrr_neutral_Face02_noeyestop.jpg	nr	neutral	no	top	no	1	486	z	z	53	8	45
Exp V1 Meye Znoeye	2	19	female	Finished stimuli\MF\Fear\mf_fear_Face05_noeyestop.jpg	MF	fear	no	top	no	1	292	z	z	53	8	45
Exp V1 Meye Znoeye	2	19	female	Finished stimuli\MF\Neutral\mf_neutral_Face05_eyesbottom.jpg	MF	neutral	no	bottom	yes	0	385	m	z	53	8	45
Exp V1 Meye Znoeye	2	19	female	Finished stimuli\nrR\Fear\nrr_fear_Face02_eyestop.jpg	nr	fear	no	top	yes	1	490	m	m	53	8	45
Exp V1 Meye Znoeye	2	19	female	Finished stimuli\MF\Fear\mf_fear_Face05_noeyes.jpg	MF	fear	yes	nm	no	1	472	z	z	53	8	45
Exp V1 Meye Znoeye	2	19	female	Finished stimuli\MO\Fear\mo_fear_Face01_eyes.jpg	MO	fear	yes	nm	yes	1	475	m	m	53	8	45
Exp V1 Meye Znoeye	2	19	female	Finished stimuli\SW\Neutral\sw_neutral_Face06_eyesmiddle.jpg	SW	neutral	no	middle	yes	1	407	m	m	54	9	45
Exp V1 Meye Znoeye	2	19	female	Finished stimuli\nrR\Fear\nrr_fear_Face02_noeyesbottom.jpg	nr	fear	no	bottom	no	1	317	z	z	53	8	45
Exp V1 Meye Znoeye	2	19	female	Finished stimuli\JJ\Neutral\jj_neutral_Face04_eyesmiddle.jpg	JJ	neutral	no	middle	yes	1	656	m	m	54	9	45
Exp V1 Meye Znoeye	2	19	female	Finished stimuli\SW\Neutral\sw_neutral_Face06_eyes.jpg	SW	neutral	yes	nm	yes	1	640	m	m	53	8	45
Exp V1 Meye Znoeye	2	19	female	Finished stimuli\SW\Fear\sw_fear_Face06_eyesbottom.jpg	SW	fear	no	bottom	yes	1	571	m	m	53	8	45
Exp V1 Meye Znoeye	2	19	female	Finished stimuli\SW\Neutral\sw_neutral_Face06_noeyes.jpg	SW	neutral	yes	nm	no	1	337	z	z	53	8	45
Exp V1 Meye Znoeye	2	19	female	Finished stimuli\MO\Fear\mo_fear_Face01_noeyes.jpg	MO	fear	yes	nm	no	1	370	z	z	53	8	45
Exp V1 Meye Znoeye	2	19	female	Finished stimuli\MF\Fear\mf_fear_Face05_eyes.jpg	MF	fear	yes	nm	yes	1	479	m	m	53	8	45
Exp V1 Meye Znoeye	2	19	female	Finished stimuli\PF\Fear\pf_fear_Face03_eyes.jpg	PF	fear	yes	nm	yes	0	515	m	z	54	9	45
Exp V1 Meye Znoeye	2	19	female	Finished stimuli\MF\Fear\mf_fear_Face05_eyestop.jpg	MF	fear	no	top	yes	1	422	m	m	53	8	45
Exp V1 Meye Znoeye	2	19	female	Finished stimuli\MF\Fear\mf_fear_Face05_eyesbottom.jpg	MF	fear	no	bottom	yes	1	839	m	m	54	9	45
Exp V1 Meye Znoeye	2	19	female	Finished stimuli\nrR\Neutral\nrr_neutral_Face02_noeyesmiddle.jpg	nr	neutral	no	middle	no	1	482	z	z	53	8	45
Exp V1 Meye Znoeye	2	19	female	Finished stimuli\PF\Neutral\pf_neutral_Face03_noeyes.jpg	PF	neutral	yes	nm	no	0	520	z	m	53	8	45
Exp V1 Meye Znoeye	2	19	female	Finished stimuli\PE\Neutral\pe_neutral_Face08_noeyes.jpg	PE	neutral	yes	nm	no	1	635	z	z	53	8	45
Exp V1 Meye Znoeye	2	19	female	Finished stimuli\SW\Neutral\sw_neutral_Face06_eyesbottom.jpg	SW	neutral	no	bottom	yes	0	583	m	z	53	8	45
Exp V1 Meye Znoeye	2	19	female	Finished stimuli\nrR\Fear\nrr_fear_Face02_noeyestop.jpg	nr	fear	no	top	no	1	360	z	z	53	8	45
Exp V1 Meye Znoeye	2	19	female	Finished stimuli\WF\Fear\wf_fear_Face10_noeyesmiddle.jpg	WF	fear	no	middle	no	1	331	z	z	54	9	45
Exp V1 Meye Znoeye	2	19	female	Finished stimuli\JJ\Neutral\jj_neutral_Face04_noeyesmiddle.jpg	JJ	neutral	no	middle	no	0	377	z	m	54	9	45
Exp V1 Meye Znoeye	2	19	female	Finished stimuli\PF\Neutral\pf_neutral_Face03_eyesbottom.jpg	PF	neutral	no	bottom	yes	0	321	m	z	53	8	45
Exp V1 Meye Znoeye	2	19	female	Finished stimuli\PE\Fear\pe_fear_Face08_noeyes.jpg	PE	fear	yes	nm	no	1	325	z	z	53	8	45
Exp V1 Meye Znoeye	2	19	female	Finished stimuli\PF\Fear\pf_fear_Face03_noeyesbottom.jpg	PF	fear	no	bottom	no	1	441	z	z	53	8	45
Exp V1 Meye Znoeye	2	19	female	Finished stimuli\MO\Neutral\mo_neutral_Face01_eyesmiddle.jpg	MO	neutral	no	middle	yes	1	431	m	m	53	8	45
Exp V1 Meye Znoeye	2	19	female	Finished stimuli\MF\Fear\mf_fear_Face05_eyesmiddle.jpg	MF	fear	no	middle	yes	1	395	m	m	54	9	45
Exp V1 Meye Znoeye	2	19	female	Finished stimuli\PE\Fear\pe_fear_Face08_noeyestop.jpg	PE	fear	no	top	no	1	374	z	z	53	8	45
Exp V1 Meye Znoeye	2	19	female	Finished stimuli\PE\Fear\pe_fear_Face08_noeyesmiddle.jpg	PE	fear	no	middle	no	1	444	z	z	53	8	45
Exp V1 Meye Znoeye	2	19	female	Finished stimuli\MO\Neutral\mo_neutral_Face01_noeyesmiddle.jpg	MO	neutral	no	middle	no	0	354	z	m	54	9	45
Exp V1 Meye Znoeye	2	19	female	Finished stimuli\MO\Fear\mo_fear_Face01_eyestop.jpg	MO	fear	no	top	yes	1	397	m	m	53	8	45
Exp V1 Meye Znoeye	2	19	female	Finished stimuli\MF\Fear\mf_fear_Face05_noeyesbottom.jpg	MF	fear	no	bottom	no	1	336	z	z	53	8	45
Exp V1 Meye Znoeye	2	19	female	Finished stimuli\nrR\Neutral\nrr_neutral_Face02_eyesmiddle.jpg	nr	neutral	no	middle	yes	1	465	m	m	53	8	45
Exp V1 Meye Znoeye	2	19	female	Finished stimuli\PF\Fear\pf_fear_Face03_eyesbottom.jpg	PF	fear	no	bottom	yes	1	290	m	m	54	9	45
Exp V1 Meye Znoeye	2	19	female	Finished stimuli\JJ\Fear\jj_fear_Face04_noeyesmiddle.jpg	JJ	fear	no	middle	no	1	295	z	z	53	8	45
Exp V1 Meye Znoeye	2	19	female	Finished stimuli\PF\Neutral\pf_neutral_Face03_noeyestop.jpg	PF	neutral	no	top	no	1	680	z	z	53	8	45
Exp V1 Meye Znoeye	2	19	female	Finished stimuli\MO\Neutral\mo_neutral_Face01_eyestop.jpg	MO	neutral	no	top	yes	1	283	m	m	53	8	45
Exp V1 Meye Znoeye	2	19	female	Finished stimuli\PE\Neutral\pe_neutral_Face08_noeyesbottom.jpg	PE	neutral	no	bottom	no	0	233	z	m	53	8	45
Exp V1 Meye Znoeye	2	19	female	Finished stimuli\PE\Neutral\pe_neutral_Face08_eyesbottom.jpg	PE	neutral	no	bottom	yes	0	349	m	z	53	8	45
Exp V1 Meye Znoeye	2	19	female	Finished stimuli\MF\Neutral\mf_neutral_Face05_noeyestop.jpg	MF	neutral	no	top	no	1	400	z	z	54	9	45
Exp V1 Meye Znoeye	2	19	female	Finished stimuli\WF\Fear\wf_fear_Face10_noeyestop.jpg	WF	fear	no	top	no	1	355	z	z	53	8	45
Exp V1 Meye Znoeye	2	19	female	Finished stimuli\PF\Neutral\pf_neutral_Face03_noeyesbottom.jpg	PF	neutral	no	bottom	no	1	646	z	z	53	8	45
Exp V1 Meye Znoeye	2	19	female	Finished stimuli\WF\Neutral\wf_neutral_Face10_eyes.jpg	WF	neutral	yes	nm	yes	0	316	m	z	53	8	45
Exp V1 Meye Znoeye	2	19	female	Finished stimuli\MO\Neutral\mo_neutral_Face01_noeyesbottom.jpg	MO	neutral	no	bottom	no	0	351	z	m	54	9	45
Exp V1 Meye Znoeye	2	19	female	Finished stimuli\SW\Fear\sw_fear_Face06_noeyes.jpg	SW	fear	yes	nm	no	1	322	z	z	54	9	45
Exp V1 Meye Znoeye	2	19	female	Finished stimuli\PF\Neutral\pf_neutral_Face03_eyes.jpg	PF	neutral	yes	nm	yes	1	416	m	m	54	9	45
Exp V1 Meye Znoeye	2	19	female	Finished stimuli\WF\Neutral\wf_neutral_Face10_eyesbottom.jpg	WF	neutral	no	bottom	yes	0	368	m	z	53	8	45
Exp V1 Meye Znoeye	2	19	female	Finished stimuli\SW\Fear\sw_fear_Face06_eyes.jpg	SW	fear	yes	nm	yes	1	326	m	m	53	8	45
Exp V1 Meye Znoeye	2	19	female	Finished stimuli\PE\Neutral\pe_neutral_Face08_eyesmiddle.jpg	PE	neutral	no	middle	yes	1	956	m	m	53	8	45
Exp V1 Meye Znoeye	2	19	female	Finished stimuli\nrR\Neutral\nrr_neutral_Face02_eyesbottom.jpg	nr	neutral	no	bottom	yes	0	376	m	z	54	9	45
Exp V1 Meye Znoeye	2	19	female	Finished stimuli\SW\Fear\sw_fear_Face06_eyesmiddle.jpg	SW	fear	no	middle	yes	1	328	m	m	53	8	45
Exp V1 Meye Znoeye	2	19	female	Finished stimuli\MO\Fear\mo_fear_Face01_noeyesmiddle.jpg	MO	fear	no	middle	no	1	334	z	z	53	8	45
Exp V1 Meye Znoeye	2	19	female	Finished stimuli\JJ\Neutral\jj_neutral_Face04_eyestop.jpg	JJ	neutral	no	top	yes	0	444	m	z	53	8	45
Exp V1 Meye Znoeye	2	19	female	Finished stimuli\nrR\Fear\nrr_fear_Face02_eyes.jpg	nr	fear	yes	nm	yes	1	378	m	m	53	8	45
Exp V1 Meye Znoeye	2	19	female	Finished stimuli\JJ\Fear\jj_fear_Face04_noeyesbottom.jpg	JJ	fear	no	bottom	no	1	411	z	z	54	9	45
Exp V1 Meye Znoeye	2	19	female	Finished stimuli\JJ\Fear\jj_fear_Face04_noeyestop.jpg	JJ	fear	no	top	no	0	353	z	m	54	9	45
Exp V1 Meye Znoeye	2	19	female	Finished stimuli\PE\Fear\pe_fear_Face08_eyestop.jpg	PE	fear	no	top	yes	1	388	m	m	53	8	45
Exp V1 Meye Znoeye	2	19	female	Finished stimuli\PE\Fear\pe_fear_Face08_noeyesbottom.jpg	PE	fear	no	bottom	no	1	316	z	z	53	8	45
Exp V1 Meye Znoeye	2	19	female	Finished stimuli\JJ\Neutral\jj_neutral_Face04_eyesbottom.jpg	JJ	neutral	no	bottom	yes	0	280	m	z	54	9	45
Exp V1 Meye Znoeye	2	19	female	Finished stimuli\nrR\Neutral\nrr_neutral_Face02_noeyes.jpg	nr	neutral	yes	nm	no	1	403	z	z	53	8	45
Exp V1 Meye Znoeye	2	19	female	Finished stimuli\JJ\Fear\jj_fear_Face04_eyes.jpg	JJ	fear	yes	nm	yes	1	297	m	m	53	8	45
Exp V1 Meye Znoeye	2	19	female	Finished stimuli\SW\Fear\sw_fear_Face06_noeyesmiddle.jpg	SW	fear	no	middle	no	1	360	z	z	53	8	45
Exp V1 Meye Znoeye	2	19	female	Finished stimuli\MF\Fear\mf_fear_Face05_noeyesmiddle.jpg	MF	fear	no	middle	no	0	420	z	m	54	9	45
Exp V1 Meye Znoeye	2	19	female	Finished stimuli\SW\Fear\sw_fear_Face06_eyestop.jpg	SW	fear	no	top	yes	1	380	m	m	53	8	45
Exp V1 Meye Znoeye	2	19	female	Finished stimuli\PE\Fear\pe_fear_Face08_eyes.jpg	PE	fear	yes	nm	yes	1	341	m	m	53	8	45
Exp V1 Meye Znoeye	2	19	female	Finished stimuli\nrR\Fear\nrr_fear_Face02_noeyes.jpg	nr	fear	yes	nm	no	1	333	z	z	53	8	45
Exp V1 Meye Znoeye	2	19	female	Finished stimuli\PE\Neutral\pe_neutral_Face08_noeyesmiddle.jpg	PE	neutral	no	middle	no	0	443	z	m	53	8	45
Exp V1 Meye Znoeye	2	19	female	Finished stimuli\WF\Fear\wf_fear_Face10_eyestop.jpg	WF	fear	no	top	yes	1	273	m	m	53	8	45
Exp V1 Meye Znoeye	2	19	female	Finished stimuli\WF\Fear\wf_fear_Face10_noeyes.jpg	WF	fear	yes	nm	no	1	301	z	z	53	8	45
Exp V1 Meye Znoeye	2	19	female	Finished stimuli\MO\Fear\mo_fear_Face01_noeyesbottom.jpg	MO	fear	no	bottom	no	1	389	z	z	53	8	45
Exp V1 Meye Znoeye	2	19	female	Finished stimuli\PF\Fear\pf_fear_Face03_noeyestop.jpg	PF	fear	no	top	no	1	304	z	z	53	8	45
Exp V1 Meye Znoeye	2	19	female	Finished stimuli\PE\Fear\pe_fear_Face08_eyesmiddle.jpg	PE	fear	no	middle	yes	1	337	m	m	53	8	45
Exp V1 Meye Znoeye	2	19	female	Finished stimuli\PF\Fear\pf_fear_Face03_eyestop.jpg	PF	fear	no	top	yes	1	418	m	m	53	8	45
Exp V1 Meye Znoeye	2	19	female	Finished stimuli\JJ\Fear\jj_fear_Face04_eyesbottom.jpg	JJ	fear	no	bottom	yes	0	354	m	z	53	8	45
Exp V1 Meye Znoeye	2	19	female	Finished stimuli\JJ\Neutral\jj_neutral_Face04_noeyestop.jpg	JJ	neutral	no	top	no	1	485	z	z	53	8	45
Exp V1 Meye Znoeye	2	19	female	Finished stimuli\MF\Neutral\mf_neutral_Face05_noeyes.jpg	MF	neutral	yes	nm	no	1	323	z	z	53	8	45
Exp V1 Meye Znoeye	2	19	female	Finished stimuli\MO\Fear\mo_fear_Face01_eyesmiddle.jpg	MO	fear	no	middle	yes	1	393	m	m	53	8	45
Exp V1 Meye Znoeye	2	19	female	Finished stimuli\PE\Neutral\pe_neutral_Face08_noeyestop.jpg	PE	neutral	no	top	no	1	317	z	z	53	8	45
Exp V1 Meye Znoeye	2	19	female	Finished stimuli\WF\Neutral\wf_neutral_Face10_noeyestop.jpg	WF	neutral	no	top	no	1	496	z	z	54	9	45
Exp V1 Meye Znoeye	2	19	female	Finished stimuli\MO\Fear\mo_fear_Face01_eyesbottom.jpg	MO	fear	no	bottom	yes	1	328	m	m	53	8	45
Exp V1 Meye Znoeye	2	19	female	Finished stimuli\SW\Neutral\sw_neutral_Face06_eyestop.jpg	SW	neutral	no	top	yes	1	350	m	m	53	8	45
Exp V1 Meye Znoeye	2	19	female	Finished stimuli\MO\Neutral\mo_neutral_Face01_eyesbottom.jpg	MO	neutral	no	bottom	yes	0	441	m	z	54	9	45
Exp V1 Meye Znoeye	2	19	female	Finished stimuli\JJ\Fear\jj_fear_Face04_noeyes.jpg	JJ	fear	yes	nm	no	1	340	z	z	53	8	45
Exp V1 Meye Znoeye	2	19	female	Finished stimuli\PE\Neutral\pe_neutral_Face08_eyes.jpg	PE	neutral	yes	nm	yes	1	492	m	m	53	8	45
Exp V1 Meye Znoeye	2	19	female	Finished stimuli\PF\Neutral\pf_neutral_Face03_eyestop.jpg	PF	neutral	no	top	yes	1	466	m	m	53	8	45
Exp V1 Meye Znoeye	2	19	female	Finished stimuli\MF\Neutral\mf_neutral_Face05_noeyesbottom.jpg	MF	neutral	no	bottom	no	1	331	z	z	53	8	45
Exp V1 Meye Znoeye	2	19	female	Finished stimuli\PF\Fear\pf_fear_Face03_noeyes.jpg	PF	fear	yes	nm	no	1	345	z	z	53	8	45
Exp V1 Meye Znoeye	2	19	female	Finished stimuli\nrR\Neutral\nrr_neutral_Face02_eyesbottom.jpg	nr	neutral	no	bottom	yes	1	404	m	m	53	8	45
Exp V1 Meye Znoeye	2	19	female	Finished stimuli\MF\Fear\mf_fear_Face05_noeyesbottom.jpg	MF	fear	no	bottom	no	1	313	z	z	53	8	45
Exp V1 Meye Znoeye	2	19	female	Finished stimuli\SW\Neutral\sw_neutral_Face06_noeyestop.jpg	SW	neutral	no	top	no	1	341	z	z	54	9	45
Exp V1 Meye Znoeye	2	19	female	Finished stimuli\WF\Neutral\wf_neutral_Face10_eyesmiddle.jpg	WF	neutral	no	middle	yes	1	413	m	m	53	8	45
Exp V1 Meye Znoeye	2	19	female	Finished stimuli\JJ\Neutral\jj_neutral_Face04_noeyesbottom.jpg	JJ	neutral	no	bottom	no	1	595	z	z	53	8	45
Exp V1 Meye Znoeye	2	19	female	Finished stimuli\PF\Fear\pf_fear_Face03_eyestop.jpg	PF	fear	no	top	yes	1	319	m	m	54	9	45
Exp V1 Meye Znoeye	2	19	female	Finished stimuli\PE\Neutral\pe_neutral_Face08_eyesbottom.jpg	PE	neutral	no	bottom	yes	0	386	m	z	54	9	45
Exp V1 Meye Znoeye	2	19	female	Finished stimuli\MO\Neutral\mo_neutral_Face01_eyestop.jpg	MO	neutral	no	top	yes	1	378	m	m	53	8	45
Exp V1 Meye Znoeye	2	19	female	Finished stimuli\MF\Fear\mf_fear_Face05_eyesbottom.jpg	MF	fear	no	bottom	yes	0	379	m	z	53	8	45
Exp V1 Meye Znoeye	2	19	female	Finished stimuli\MF\Fear\mf_fear_Face05_noeyesmiddle.jpg	MF	fear	no	middle	no	0	499	z	m	54	9	45
Exp V1 Meye Znoeye	2	19	female	Finished stimuli\WF\Neutral\wf_neutral_Face10_noeyestop.jpg	WF	neutral	no	top	no	0	435	z	m	53	8	45
Exp V1 Meye Znoeye	2	19	female	Finished stimuli\WF\Fear\wf_fear_Face10_eyesbottom.jpg	WF	fear	no	bottom	yes	0	367	m	z	53	8	45
Exp V1 Meye Znoeye	2	19	female	Finished stimuli\PE\Fear\pe_fear_Face08_noeyesbottom.jpg	PE	fear	no	bottom	no	1	564	z	z	53	8	45
Exp V1 Meye Znoeye	2	19	female	Finished stimuli\SW\Neutral\sw_neutral_Face06_eyesbottom.jpg	SW	neutral	no	bottom	yes	0	442	m	z	53	8	45
Exp V1 Meye Znoeye	2	19	female	Finished stimuli\SW\Fear\sw_fear_Face06_eyesbottom.jpg	SW	fear	no	bottom	yes	0	560	m	z	53	8	45
Exp V1 Meye Znoeye	2	19	female	Finished stimuli\MF\Neutral\mf_neutral_Face05_eyesbottom.jpg	MF	neutral	no	bottom	yes	1	500	m	m	54	9	45
Exp V1 Meye Znoeye	2	19	female	Finished stimuli\JJ\Neutral\jj_neutral_Face04_eyesbottom.jpg	JJ	neutral	no	bottom	yes	0	356	m	z	53	8	45
Exp V1 Meye Znoeye	2	19	female	Finished stimuli\JJ\Fear\jj_fear_Face04_noeyes.jpg	JJ	fear	yes	nm	no	1	368	z	z	54	9	45
Exp V1 Meye Znoeye	2	19	female	Finished stimuli\JJ\Fear\jj_fear_Face04_eyestop.jpg	JJ	fear	no	top	yes	1	230	m	m	54	9	45
Exp V1 Meye Znoeye	2	19	female	Finished stimuli\MF\Fear\mf_fear_Face05_eyes.jpg	MF	fear	yes	nm	yes	1	337	m	m	54	9	45
Exp V1 Meye Znoeye	2	19	female	Finished stimuli\nrR\Fear\nrr_fear_Face02_noeyes.jpg	nr	fear	yes	nm	no	1	337	z	z	53	8	45
Exp V1 Meye Znoeye	2	19	female	Finished stimuli\MO\Fear\mo_fear_Face01_eyes.jpg	MO	fear	yes	nm	yes	1	370	m	m	53	8	45
Exp V1 Meye Znoeye	2	19	female	Finished stimuli\MF\Fear\mf_fear_Face05_eyesmiddle.jpg	MF	fear	no	middle	yes	1	304	m	m	53	8	45
Exp V1 Meye Znoeye	2	19	female	Finished stimuli\WF\Fear\wf_fear_Face10_eyestop.jpg	WF	fear	no	top	yes	1	328	m	m	53	8	45
Exp V1 Meye Znoeye	2	19	female	Finished stimuli\SW\Fear\sw_fear_Face06_eyesmiddle.jpg	SW	fear	no	middle	yes	1	438	m	m	53	8	45
Exp V1 Meye Znoeye	2	19	female	Finished stimuli\MO\Fear\mo_fear_Face01_eyestop.jpg	MO	fear	no	top	yes	1	426	m	m	54	9	45
Exp V1 Meye Znoeye	2	19	female	Finished stimuli\nrR\Neutral\nrr_neutral_Face02_eyesmiddle.jpg	nr	neutral	no	middle	yes	1	410	m	m	53	8	45
Exp V1 Meye Znoeye	2	19	female	Finished stimuli\MF\Neutral\mf_neutral_Face05_noeyesbottom.jpg	MF	neutral	no	bottom	no	1	503	z	z	53	8	45
Exp V1 Meye Znoeye	2	19	female	Finished stimuli\nrR\Fear\nrr_fear_Face02_noeyesbottom.jpg	nr	fear	no	bottom	no	0	360	z	m	53	8	45
Exp V1 Meye Znoeye	2	19	female	Finished stimuli\MO\Fear\mo_fear_Face01_eyesmiddle.jpg	MO	fear	no	middle	yes	1	499	m	m	53	8	45
Exp V1 Meye Znoeye	2	19	female	Finished stimuli\MO\Neutral\mo_neutral_Face01_eyesmiddle.jpg	MO	neutral	no	middle	yes	1	324	m	m	54	9	45
Exp V1 Meye Znoeye	2	19	female	Finished stimuli\PF\Neutral\pf_neutral_Face03_noeyesbottom.jpg	PF	neutral	no	bottom	no	0	378	z	m	54	9	45
Exp V1 Meye Znoeye	2	19	female	Finished stimuli\JJ\Fear\jj_fear_Face04_noeyesmiddle.jpg	JJ	fear	no	middle	no	1	418	z	z	53	8	45
Exp V1 Meye Znoeye	2	19	female	Finished stimuli\MF\Neutral\mf_neutral_Face05_eyesmiddle.jpg	MF	neutral	no	middle	yes	1	435	m	m	53	8	45
Exp V1 Meye Znoeye	2	19	female	Finished stimuli\MO\Neutral\mo_neutral_Face01_noeyestop.jpg	MO	neutral	no	top	no	1	470	z	z	53	8	45
Exp V1 Meye Znoeye	2	19	female	Finished stimuli\PE\Neutral\pe_neutral_Face08_noeyesmiddle.jpg	PE	neutral	no	middle	no	0	362	z	m	53	8	45
Exp V1 Meye Znoeye	2	19	female	Finished stimuli\PF\Fear\pf_fear_Face03_noeyesmiddle.jpg	PF	fear	no	middle	no	1	295	z	z	53	8	45
Exp V1 Meye Znoeye	2	19	female	Finished stimuli\SW\Fear\sw_fear_Face06_eyes.jpg	SW	fear	yes	nm	yes	1	360	m	m	53	8	45
Exp V1 Meye Znoeye	2	19	female	Finished stimuli\MF\Fear\mf_fear_Face05_eyestop.jpg	MF	fear	no	top	yes	1	323	m	m	53	8	45
Exp V1 Meye Znoeye	2	19	female	Finished stimuli\nrR\Neutral\nrr_neutral_Face02_noeyes.jpg	nr	neutral	yes	nm	no	0	705	z	m	53	8	45
Exp V1 Meye Znoeye	2	19	female	Finished stimuli\PE\Fear\pe_fear_Face08_eyestop.jpg	PE	fear	no	top	yes	1	338	m	m	53	8	45
Exp V1 Meye Znoeye	2	19	female	Finished stimuli\PF\Neutral\pf_neutral_Face03_eyestop.jpg	PF	neutral	no	top	yes	1	290	m	m	53	8	45
Exp V1 Meye Znoeye	2	19	female	Finished stimuli\SW\Neutral\sw_neutral_Face06_eyestop.jpg	SW	neutral	no	top	yes	1	312	m	m	53	8	45
Exp V1 Meye Znoeye	2	19	female	Finished stimuli\PE\Fear\pe_fear_Face08_noeyesmiddle.jpg	PE	fear	no	middle	no	1	316	z	z	54	9	45
Exp V1 Meye Znoeye	2	19	female	Finished stimuli\JJ\Fear\jj_fear_Face04_noeyesbottom.jpg	JJ	fear	no	bottom	no	1	599	z	z	54	9	45
Exp V1 Meye Znoeye	2	19	female	Finished stimuli\WF\Fear\wf_fear_Face10_noeyesbottom.jpg	WF	fear	no	bottom	no	1	361	z	z	53	8	45
Exp V1 Meye Znoeye	2	19	female	Finished stimuli\MO\Fear\mo_fear_Face01_noeyes.jpg	MO	fear	yes	nm	no	1	343	z	z	53	8	45
Exp V1 Meye Znoeye	2	19	female	Finished stimuli\SW\Neutral\sw_neutral_Face06_noeyesmiddle.jpg	SW	neutral	no	middle	no	0	312	z	m	54	9	45
Exp V1 Meye Znoeye	2	19	female	Finished stimuli\WF\Neutral\wf_neutral_Face10_eyes.jpg	WF	neutral	yes	nm	yes	1	515	m	m	53	8	45
Exp V1 Meye Znoeye	2	19	female	Finished stimuli\PE\Fear\pe_fear_Face08_noeyestop.jpg	PE	fear	no	top	no	1	246	z	z	53	8	45
Exp V1 Meye Znoeye	2	19	female	Finished stimuli\SW\Neutral\sw_neutral_Face06_eyesmiddle.jpg	SW	neutral	no	middle	yes	1	428	m	m	53	8	45
Exp V1 Meye Znoeye	2	19	female	Finished stimuli\PE\Neutral\pe_neutral_Face08_noeyes.jpg	PE	neutral	yes	nm	no	1	375	z	z	53	8	45
Exp V1 Meye Znoeye	2	19	female	Finished stimuli\WF\Fear\wf_fear_Face10_noeyestop.jpg	WF	fear	no	top	no	1	360	z	z	53	8	45
Exp V1 Meye Znoeye	2	19	female	Finished stimuli\SW\Fear\sw_fear_Face06_eyestop.jpg	SW	fear	no	top	yes	1	331	m	m	53	8	45
Exp V1 Meye Znoeye	2	19	female	Finished stimuli\WF\Neutral\wf_neutral_Face10_noeyesmiddle.jpg	WF	neutral	no	middle	no	0	353	z	m	53	8	45
Exp V1 Meye Znoeye	2	19	female	Finished stimuli\JJ\Fear\jj_fear_Face04_eyesmiddle.jpg	JJ	fear	no	middle	yes	1	644	m	m	53	8	45
Exp V1 Meye Znoeye	2	19	female	Finished stimuli\nrR\Neutral\nrr_neutral_Face02_eyestop.jpg	nr	neutral	no	top	yes	1	530	m	m	53	8	45
Exp V1 Meye Znoeye	2	19	female	Finished stimuli\MF\Fear\mf_fear_Face05_noeyes.jpg	MF	fear	yes	nm	no	1	336	z	z	53	8	45
Exp V1 Meye Znoeye	2	19	female	Finished stimuli\MO\Fear\mo_fear_Face01_noeyesbottom.jpg	MO	fear	no	bottom	no	1	289	z	z	53	8	45
Exp V1 Meye Znoeye	2	19	female	Finished stimuli\WF\Neutral\wf_neutral_Face10_eyestop.jpg	WF	neutral	no	top	yes	0	583	m	z	53	8	45
Exp V1 Meye Znoeye	2	19	female	Finished stimuli\PF\Fear\pf_fear_Face03_eyesmiddle.jpg	PF	fear	no	middle	yes	1	344	m	m	54	9	45
Exp V1 Meye Znoeye	2	19	female	Finished stimuli\PF\Fear\pf_fear_Face03_noeyes.jpg	PF	fear	yes	nm	no	1	304	z	z	53	8	45
Exp V1 Meye Znoeye	2	19	female	Finished stimuli\PE\Fear\pe_fear_Face08_noeyes.jpg	PE	fear	yes	nm	no	0	481	z	m	54	9	45
Exp V1 Meye Znoeye	2	19	female	Finished stimuli\PE\Neutral\pe_neutral_Face08_noeyestop.jpg	PE	neutral	no	top	no	1	420	z	z	53	8	45
Exp V1 Meye Znoeye	2	19	female	Finished stimuli\JJ\Fear\jj_fear_Face04_eyesbottom.jpg	JJ	fear	no	bottom	yes	1	484	m	m	54	9	45
Exp V1 Meye Znoeye	2	19	female	Finished stimuli\nrR\Fear\nrr_fear_Face02_eyestop.jpg	nr	fear	no	top	yes	1	418	m	m	54	9	45
Exp V1 Meye Znoeye	2	19	female	Finished stimuli\MF\Neutral\mf_neutral_Face05_eyes.jpg	MF	neutral	yes	nm	yes	1	458	m	m	53	8	45
Exp V1 Meye Znoeye	2	19	female	Finished stimuli\JJ\Neutral\jj_neutral_Face04_eyes.jpg	JJ	neutral	yes	nm	yes	1	619	m	m	53	8	45
Exp V1 Meye Znoeye	2	19	female	Finished stimuli\PE\Fear\pe_fear_Face08_eyesmiddle.jpg	PE	fear	no	middle	yes	1	332	m	m	54	9	45
Exp V1 Meye Znoeye	2	19	female	Finished stimuli\PE\Neutral\pe_neutral_Face08_eyestop.jpg	PE	neutral	no	top	yes	1	346	m	m	53	8	45
Exp V1 Meye Znoeye	2	19	female	Finished stimuli\PE\Neutral\pe_neutral_Face08_eyesmiddle.jpg	PE	neutral	no	middle	yes	1	514	m	m	53	8	45
Exp V1 Meye Znoeye	2	19	female	Finished stimuli\PE\Neutral\pe_neutral_Face08_noeyesbottom.jpg	PE	neutral	no	bottom	no	1	309	z	z	53	8	45
Exp V1 Meye Znoeye	2	19	female	Finished stimuli\nrR\Fear\nrr_fear_Face02_noeyestop.jpg	nr	fear	no	top	no	1	353	z	z	54	9	45
Exp V1 Meye Znoeye	2	19	female	Finished stimuli\JJ\Fear\jj_fear_Face04_noeyestop.jpg	JJ	fear	no	top	no	1	292	z	z	53	8	45
Exp V1 Meye Znoeye	2	19	female	Finished stimuli\WF\Fear\wf_fear_Face10_noeyesmiddle.jpg	WF	fear	no	middle	no	1	586	z	z	54	9	45
Exp V1 Meye Znoeye	2	19	female	Finished stimuli\PF\Neutral\pf_neutral_Face03_noeyestop.jpg	PF	neutral	no	top	no	1	395	z	z	53	8	45
Exp V1 Meye Znoeye	2	19	female	Finished stimuli\MO\Neutral\mo_neutral_Face01_eyesbottom.jpg	MO	neutral	no	bottom	yes	0	454	m	z	54	9	45
[truncated: 8,243 more rows]
