# Supplementary material for: The perceptual saliency of fearful eyes and smiles: A signal detection study
Source: PLoS One. 2017 Mar 7;12(3):e0173199. doi: 10.1371/journal.pone.0173199 (PMC5340363; doi:10.1371/journal.pone.0173199)
Supplement: S2 Fig — The overall data pertaining to experiment 2. (XLSX) [file pone.0173199.s002.xlsx]

## Sheet: Exp2_N15
E:\Eye Detection Data\IramYousaf\Results\EXP_p's1-15\results_N15_upload.emrg2
ExperimentName	Subject	Age	Sex	Stimuli	face	Expression	canonical	Eyes	RespFaceNoface.ACC	RespFaceNoface.RT	Target.DurationError	BackwardMask.OnsetDelay	correctResp	RespFaceNoface.RESP
Exp V1 Meye Znoeye	12	18	female	Finished stimuli\jjfear_jumblednoeyes.jpg	jj	fear	no	no	1	426	0	6	z	z
Exp V1 Meye Znoeye	12	18	female	Finished stimuli\wf_fea_up_noeyes.jpg	wf	fear	yes	no	0	219	0	-5	z	m
Exp V1 Meye Znoeye	12	18	female	Finished stimuli\mf_happy_jumbledeyes.jpg	mf	happy	no	yes	1	313	0	-5	m	m
Exp V1 Meye Znoeye	12	18	female	Finished stimuli\mf_fear_up_noeye.jpg	mf	fear	yes	no	1	285	0	6	z	z
Exp V1 Meye Znoeye	12	18	female	Finished stimuli\em_fear_jumbledeyes.jpg	em	fear	no	yes	1	285	0	-5	m	m
Exp V1 Meye Znoeye	12	18	female	Finished stimuli\pf_fear_up_noeyes.jpg	pf	fear	yes	no	1	381	0	-5	z	z
Exp V1 Meye Znoeye	12	18	female	Finished stimuli\rhap_jumbled_noeyes.jpg	rh	happy	no	no	1	398	0	5	z	z
Exp V1 Meye Znoeye	12	18	female	Finished stimuli\wf_hap_upeyes.jpg	wf	happy	yes	yes	1	310	0	6	m	m
Exp V1 Meye Znoeye	12	18	female	Finished stimuli\em_hap_jumblednoeyes.jpg	em	happy	no	no	1	494	0	-5	z	z
Exp V1 Meye Znoeye	12	18	female	Finished stimuli\pefear_upeyes.jpg	pe	fear	yes	yes	1	295	0	-5	m	m
Exp V1 Meye Znoeye	12	18	female	Finished stimuli\em_fear_jumblednoeyes.jpg	em	fear	no	no	1	371	0	6	z	z
Exp V1 Meye Znoeye	12	18	female	Finished stimuli\cc_happy_jumblednoeyes.jpg	cc	happy	no	no	0	373	0	-5	z	m
Exp V1 Meye Znoeye	12	18	female	Finished stimuli\sw_fear_jumbled_eyes.jpg	sw	fear	no	yes	1	291	0	-5	m	m
Exp V1 Meye Znoeye	12	18	female	Finished stimuli\mf_happy_upeyes.jpg	mf	happy	yes	yes	1	395	0	-5	m	m
Exp V1 Meye Znoeye	12	18	female	Finished stimuli\mf_happy_jumbled_noeyes.jpg	mf	happy	no	no	0	373	0	5	z	m
Exp V1 Meye Znoeye	12	18	female	Finished stimuli\pehappy_upeyes.jpg	pe	happy	yes	yes	1	316	0	-5	m	m
Exp V1 Meye Znoeye	12	18	female	Finished stimuli\JJhappyupnoeyes.jpg	JJ	happy	yes	no	0	336	0	-5	z	m
Exp V1 Meye Znoeye	12	18	female	Finished stimuli\pehappy_noeyes.jpg	pe	happy	yes	no	1	461	0	-5	z	z
Exp V1 Meye Znoeye	12	18	female	Finished stimuli\wf_hap_jumbled_noeyes.jpg	wf	happy	no	no	1	328	0	-5	z	z
Exp V1 Meye Znoeye	12	18	female	Finished stimuli\cc_fear_up.jpg	cc	fear	yes	yes	1	301	0	-5	m	m
Exp V1 Meye Znoeye	12	18	female	Finished stimuli\mo_hap_jumbledeyes.jpg	mo	happy	no	yes	0	320	0	-5	m	z
Exp V1 Meye Znoeye	12	18	female	Finished stimuli\pf_hap_upeye.jpg	pf	happy	yes	yes	1	237	0	-5	m	m
Exp V1 Meye Znoeye	12	18	female	Finished stimuli\pehappy_jumbled_no_eyes.jpg	pe	happy	no	no	1	297	0	6	z	z
Exp V1 Meye Znoeye	12	18	female	Finished stimuli\jjfear_jumbledeyes.jpg	jj	fear	no	yes	1	261	0	-5	m	m
Exp V1 Meye Znoeye	12	18	female	Finished stimuli\mf_fear_jumblednoeye.jpg	mf	fear	no	no	1	225	0	-5	z	z
Exp V1 Meye Znoeye	12	18	female	Finished stimuli\jjfear_upnoeyes.jpg	jj	fear	yes	no	0	332	0	-5	z	m
Exp V1 Meye Znoeye	12	18	female	Finished stimuli\pf_hap_up_noeye.jpg	pf	happy	yes	no	1	221	0	5	z	z
Exp V1 Meye Znoeye	12	18	female	Finished stimuli\JJhappyjumblednoeyes.jpg	JJ	happy	no	yes	0	440	0	-5	m	z
Exp V1 Meye Znoeye	12	18	female	Finished stimuli\mf_fear_upeye.jpg	mf	fear	yes	yes	1	231	0	6	m	m
Exp V1 Meye Znoeye	12	18	female	Finished stimuli\mo_hap_jumblednoeyes.jpg	mo	happy	no	no	1	103	0	6	z	z
Exp V1 Meye Znoeye	12	18	female	Finished stimuli\jjfear_upeyes.jpg	jj	fear	yes	yes	1	90	0	-5	m	m
Exp V1 Meye Znoeye	12	18	female	Finished stimuli\rfear_upeys.jpg	rf	fear	yes	yes	0	146	0	-5	m	z
Exp V1 Meye Znoeye	12	18	female	Finished stimuli\wf_hap_jumbledeyes.jpg	wf	happy	no	yes	1	688	0	6	z	z
Exp V1 Meye Znoeye	12	18	female	Finished stimuli\wf_fea_jumbled_eyes.jpg	wf	fear	no	yes	1	248	0	-5	m	m
Exp V1 Meye Znoeye	12	18	female	Finished stimuli\pf_fear_jumbledeyes.jpg	pf	fear	no	yes	1	179	0	5	m	m
Exp V1 Meye Znoeye	12	18	female	Finished stimuli\em_hap_upeyes.jpg	em	happy	yes	yes	1	338	0	6	m	m
Exp V1 Meye Znoeye	12	18	female	Finished stimuli\wf_fea_up eyes.jpg	wf	fear	yes	yes	1	259	0	6	m	m
Exp V1 Meye Znoeye	12	18	female	Finished stimuli\sw_hap_upeyes.jpg	sw	happy	yes	yes	1	350	0	5	m	m
Exp V1 Meye Znoeye	12	18	female	Finished stimuli\sw_fear_jumbled_noeyes.jpg	sw	fear	no	no	0	595	0	5	z	m
Exp V1 Meye Znoeye	12	18	female	Finished stimuli\sw_hap_noeyes.jpg	sw	happy	yes	no	0	893	0	-5	z	m
Exp V1 Meye Znoeye	12	18	female	Finished stimuli\wf_hap_up_noeyes.jpg	wf	happy	yes	no	1	369	0	-5	m	m
Exp V1 Meye Znoeye	12	18	female	Finished stimuli\em_fear_upeyes.jpg	em	fear	yes	yes	1	328	0	6	m	m
Exp V1 Meye Znoeye	12	18	female	Finished stimuli\jjhap_jumbledeyes.jpg	jj	happy	no	yes	0	680	0	-5	m	z
Exp V1 Meye Znoeye	12	18	female	Finished stimuli\wf_hap_upeyes.jpg	wf	happy	yes	yes	1	564	0	-5	m	m
Exp V1 Meye Znoeye	12	18	female	Finished stimuli\cc_fearjumbledno_eye.jpg	cc	fear	no	no	1	369	0	5	z	z
Exp V1 Meye Znoeye	12	18	female	Finished stimuli\rfear_jumbledeyess.jpg	rf	fear	no	yes	1	332	0	-5	m	m
Exp V1 Meye Znoeye	12	18	female	Finished stimuli\pf_hap_jumbled_noeye.jpg	pf	happy	no	no	0	469	0	6	z	m
Exp V1 Meye Znoeye	12	18	female	Finished stimuli\wf_fea_jumbled_noeyes.jpg	wf	fear	no	no	0	405	0	-5	z	m
Exp V1 Meye Znoeye	12	18	female	Finished stimuli\cc_happy_upeyes.jpg	cc	happy	yes	yes	1	447	0	-5	m	m
Exp V1 Meye Znoeye	12	18	female	Finished stimuli\pefear_up_jumbled_noeyes.jpg	pe	fear	no	no	1	454	0	6	z	z
Exp V1 Meye Znoeye	12	18	female	Finished stimuli\mo_fear_upeyes.jpg	mo	fear	yes	yes	1	271	0	6	m	m
Exp V1 Meye Znoeye	12	18	female	Finished stimuli\mo_fear_upnoeyes.jpg	mo	fear	yes	no	1	343	0	-5	m	m
Exp V1 Meye Znoeye	12	18	female	Finished stimuli\em_fear_noeyes.jpg	em	fear	yes	no	0	1264	0	-5	z	m
Exp V1 Meye Znoeye	12	18	female	Finished stimuli\mf_fear_jumbledeye.jpg	mf	fear	no	yes	1	296	0	-5	m	m
Exp V1 Meye Znoeye	12	18	female	Finished stimuli\mo_hap_up_noeyes.jpg	mo	happy	yes	no	0	324	0	5	z	m
Exp V1 Meye Znoeye	12	18	female	Finished stimuli\sw_hap_jumbledeyes.jpg	sw	happy	no	yes	1	285	0	-5	m	m
Exp V1 Meye Znoeye	12	18	female	Finished stimuli\pehappy_jumbled_eyes.jpg	pe	happy	no	yes	1	765	0	-5	m	m
Exp V1 Meye Znoeye	12	18	female	Finished stimuli\cc_fear_jumbledeyes.jpg	cc	fear	no	yes	1	342	0	6	m	m
Exp V1 Meye Znoeye	12	18	female	Finished stimuli\pefear_up_noeyes.jpg	pe	fear	yes	no	1	199	0	5	z	z
Exp V1 Meye Znoeye	12	18	female	Finished stimuli\rhap_noeyes.jpg	rh	happy	yes	no	0	290	0	-5	z	m
Exp V1 Meye Znoeye	12	18	female	Finished stimuli\sw_fear_upeyes.jpg	sw	fear	yes	yes	1	366	0	-5	m	m
Exp V1 Meye Znoeye	12	18	female	Finished stimuli\em_hap_noeyes.jpg	em	happy	yes	no	0	304	0	6	z	m
Exp V1 Meye Znoeye	12	18	female	Finished stimuli\sw_hap_jumbled_noeyes.jpg	sw	happy	no	no	0	292	0	-5	z	m
Exp V1 Meye Znoeye	12	18	female	Finished stimuli\mf_happy_upno_eyes.jpg	mf	happy	yes	no	0	377	0	6	z	m
Exp V1 Meye Znoeye	12	18	female	Finished stimuli\pf_hap_jumbledeye.jpg	pf	happy	no	yes	1	731	0	-5	m	m
Exp V1 Meye Znoeye	12	18	female	Finished stimuli\mo_fear_jumblednoeyes.jpg	mo	fear	no	no	1	340	0	-5	z	z
Exp V1 Meye Znoeye	12	18	female	Finished stimuli\sw_fear_noeyes.jpg	sw	fear	yes	no	1	380	0	6	z	z
Exp V1 Meye Znoeye	12	18	female	Finished stimuli\em_hap_jumbledeyes.jpg	em	happy	no	yes	0	299	0	-5	m	z
Exp V1 Meye Znoeye	12	18	female	Finished stimuli\rhap_jumbledeyes.jpg	rh	happy	no	yes	1	331	0	-5	m	m
Exp V1 Meye Znoeye	12	18	female	Finished stimuli\rfear_up_noeys.jpg	rf	fear	yes	no	0	309	0	6	z	m
Exp V1 Meye Znoeye	12	18	female	Finished stimuli\pf_fear_jumbled_noeyes.jpg	pf	fear	no	no	1	814	0	-5	z	z
Exp V1 Meye Znoeye	12	18	female	Finished stimuli\mo_hap_upeyes.jpg	mo	happy	yes	yes	1	197	0	-5	m	m
Exp V1 Meye Znoeye	12	18	female	Finished stimuli\cc_fear_noeyes.jpg	cc	fear	yes	no	1	520	0	-5	z	z
Exp V1 Meye Znoeye	12	18	female	Finished stimuli\JJhappyupeyes.jpg	JJ	happy	yes	yes	1	321	0	-5	m	m
Exp V1 Meye Znoeye	12	18	female	Finished stimuli\cc_happy_jumbledeyes.jpg	cc	happy	no	yes	1	605	0	-5	m	m
Exp V1 Meye Znoeye	12	18	female	Finished stimuli\mo_fear_jumbledeyes.jpg	mo	fear	no	yes	1	355	0	5	m	m
Exp V1 Meye Znoeye	12	18	female	Finished stimuli\cc_happy_upnoeyes.jpg	cc	happy	yes	no	1	253	0	-5	z	z
Exp V1 Meye Znoeye	12	18	female	Finished stimuli\rfear_jumbled_noeyess.jpg	rf	fear	no	no	1	316	0	5	z	z
Exp V1 Meye Znoeye	12	18	female	Finished stimuli\pefear_up_jumbledeyes.jpg	pe	fear	no	yes	1	421	0	-5	m	m
Exp V1 Meye Znoeye	12	18	female	Finished stimuli\pf_fear_upeyes.jpg	pf	fear	yes	yes	1	477	0	6	m	m
Exp V1 Meye Znoeye	12	18	female	Finished stimuli\rhap.jpg	rh	happy	yes	yes	1	536	0	5	m	m
Exp V1 Meye Znoeye	12	18	female	Finished stimuli\rhap_noeyes.jpg	rh	happy	yes	no	0	288	0	-5	z	m
Exp V1 Meye Znoeye	12	18	female	Finished stimuli\mo_hap_up_noeyes.jpg	mo	happy	yes	no	0	264	0	-5	z	m
Exp V1 Meye Znoeye	12	18	female	Finished stimuli\pf_hap_jumbled_noeye.jpg	pf	happy	no	no	0	296	0	-5	z	m
Exp V1 Meye Znoeye	12	18	female	Finished stimuli\sw_hap_upeyes.jpg	sw	happy	yes	yes	1	260	0	6	m	m
Exp V1 Meye Znoeye	12	18	female	Finished stimuli\mo_hap_jumblednoeyes.jpg	mo	happy	no	no	0	356	0	-5	z	m
Exp V1 Meye Znoeye	12	18	female	Finished stimuli\cc_fear_noeyes.jpg	cc	fear	yes	no	0	818	0	-5	z	m
Exp V1 Meye Znoeye	12	18	female	Finished stimuli\pefear_up_noeyes.jpg	pe	fear	yes	no	1	221	0	-5	z	z
Exp V1 Meye Znoeye	12	18	female	Finished stimuli\rfear_up_noeys.jpg	rf	fear	yes	no	0	231	0	6	z	m
Exp V1 Meye Znoeye	12	18	female	Finished stimuli\jjhap_jumbledeyes.jpg	jj	happy	no	yes	0	1183	0	6	m	z
Exp V1 Meye Znoeye	12	18	female	Finished stimuli\rfear_upeys.jpg	rf	fear	yes	yes	1	296	0	-5	m	m
Exp V1 Meye Znoeye	12	18	female	Finished stimuli\em_hap_jumbledeyes.jpg	em	happy	no	yes	0	401	0	-5	m	z
Exp V1 Meye Znoeye	12	18	female	Finished stimuli\JJhappyjumblednoeyes.jpg	JJ	happy	no	yes	0	699	0	6	m	z
Exp V1 Meye Znoeye	12	18	female	Finished stimuli\wf_hap_jumbled_noeyes.jpg	wf	happy	no	no	1	372	0	-5	z	z
Exp V1 Meye Znoeye	12	18	female	Finished stimuli\jjfear_upeyes.jpg	jj	fear	yes	yes	1	262	0	-5	m	m
Exp V1 Meye Znoeye	12	18	female	Finished stimuli\wf_hap_jumbledeyes.jpg	wf	happy	no	yes	1	301	0	5	z	z
Exp V1 Meye Znoeye	12	18	female	Finished stimuli\cc_happy_upeyes.jpg	cc	happy	yes	yes	1	238	0	-5	m	m
Exp V1 Meye Znoeye	12	18	female	Finished stimuli\mo_fear_jumbledeyes.jpg	mo	fear	no	yes	1	286	0	6	m	m
Exp V1 Meye Znoeye	12	18	female	Finished stimuli\mo_fear_upnoeyes.jpg	mo	fear	yes	no	1	314	0	-5	m	m
Exp V1 Meye Znoeye	12	18	female	Finished stimuli\em_hap_upeyes.jpg	em	happy	yes	yes	1	238	0	-5	m	m
Exp V1 Meye Znoeye	12	18	female	Finished stimuli\pehappy_upeyes.jpg	pe	happy	yes	yes	1	641	0	-5	m	m
Exp V1 Meye Znoeye	12	18	female	Finished stimuli\rfear_jumbledeyess.jpg	rf	fear	no	yes	0	344	0	-5	m	z
Exp V1 Meye Znoeye	12	18	female	Finished stimuli\em_hap_noeyes.jpg	em	happy	yes	no	0	202	0	6	z	m
Exp V1 Meye Znoeye	12	18	female	Finished stimuli\wf_hap_up_noeyes.jpg	wf	happy	yes	no	1	388	0	-5	m	m
Exp V1 Meye Znoeye	12	18	female	Finished stimuli\em_fear_upeyes.jpg	em	fear	yes	yes	1	995	0	-5	m	m
Exp V1 Meye Znoeye	12	18	female	Finished stimuli\jjfear_jumbledeyes.jpg	jj	fear	no	yes	1	237	0	-5	m	m
Exp V1 Meye Znoeye	12	18	female	Finished stimuli\pf_hap_upeye.jpg	pf	happy	yes	yes	1	325	0	-5	m	m
Exp V1 Meye Znoeye	12	18	female	Finished stimuli\rfear_jumbled_noeyess.jpg	rf	fear	no	no	1	862	0	6	z	z
Exp V1 Meye Znoeye	12	18	female	Finished stimuli\cc_fearjumbledno_eye.jpg	cc	fear	no	no	0	548	0	-5	z	m
Exp V1 Meye Znoeye	12	18	female	Finished stimuli\pf_fear_jumbledeyes.jpg	pf	fear	no	yes	1	382	0	-5	m	m
Exp V1 Meye Znoeye	12	18	female	Finished stimuli\em_fear_jumbledeyes.jpg	em	fear	no	yes	1	516	0	-5	m	m
Exp V1 Meye Znoeye	12	18	female	Finished stimuli\mf_happy_upno_eyes.jpg	mf	happy	yes	no	1	305	0	-5	z	z
Exp V1 Meye Znoeye	12	18	female	Finished stimuli\mo_hap_upeyes.jpg	mo	happy	yes	yes	1	458	0	6	m	m
Exp V1 Meye Znoeye	12	18	female	Finished stimuli\wf_fea_jumbled_noeyes.jpg	wf	fear	no	no	1	421	0	-5	z	z
Exp V1 Meye Znoeye	12	18	female	Finished stimuli\mo_fear_jumblednoeyes.jpg	mo	fear	no	no	1	443	0	5	z	z
Exp V1 Meye Znoeye	12	18	female	Finished stimuli\wf_fea_up_noeyes.jpg	wf	fear	yes	no	1	591	0	-5	z	z
Exp V1 Meye Znoeye	12	18	female	Finished stimuli\pf_fear_jumbled_noeyes.jpg	pf	fear	no	no	1	537	0	-5	z	z
Exp V1 Meye Znoeye	12	18	female	Finished stimuli\mf_happy_upeyes.jpg	mf	happy	yes	yes	1	262	0	5	m	m
Exp V1 Meye Znoeye	12	18	female	Finished stimuli\pehappy_noeyes.jpg	pe	happy	yes	no	1	406	0	6	z	z
Exp V1 Meye Znoeye	12	18	female	Finished stimuli\jjfear_jumblednoeyes.jpg	jj	fear	no	no	0	649	0	-5	z	m
Exp V1 Meye Znoeye	12	18	female	Finished stimuli\pf_fear_up_noeyes.jpg	pf	fear	yes	no	1	688	0	5	z	z
Exp V1 Meye Znoeye	12	18	female	Finished stimuli\cc_fear_jumbledeyes.jpg	cc	fear	no	yes	1	289	0	-5	m	m
Exp V1 Meye Znoeye	12	18	female	Finished stimuli\sw_hap_jumbledeyes.jpg	sw	happy	no	yes	1	461	0	-5	m	m
Exp V1 Meye Znoeye	12	18	female	Finished stimuli\wf_hap_upeyes.jpg	wf	happy	yes	yes	0	428	0	5	m	z
Exp V1 Meye Znoeye	12	18	female	Finished stimuli\pf_hap_up_noeye.jpg	pf	happy	yes	no	0	388	0	6	z	m
Exp V1 Meye Znoeye	12	18	female	Finished stimuli\cc_happy_jumbledeyes.jpg	cc	happy	no	yes	1	1157	0	-5	m	m
Exp V1 Meye Znoeye	12	18	female	Finished stimuli\rhap.jpg	rh	happy	yes	yes	1	283	0	-5	m	m
Exp V1 Meye Znoeye	12	18	female	Finished stimuli\mf_fear_up_noeye.jpg	mf	fear	yes	no	1	287	0	5	z	z
Exp V1 Meye Znoeye	12	18	female	Finished stimuli\pf_fear_upeyes.jpg	pf	fear	yes	yes	1	236	0	-5	m	m
Exp V1 Meye Znoeye	12	18	female	Finished stimuli\pefear_up_jumbled_noeyes.jpg	pe	fear	no	no	1	607	0	-5	z	z
Exp V1 Meye Znoeye	12	18	female	Finished stimuli\sw_hap_noeyes.jpg	sw	happy	yes	no	0	118	0	-5	z	m
Exp V1 Meye Znoeye	12	18	female	Finished stimuli\wf_fea_up eyes.jpg	wf	fear	yes	yes	1	271	0	-5	m	m
Exp V1 Meye Znoeye	12	18	female	Finished stimuli\rhap_jumbledeyes.jpg	rh	happy	no	yes	1	407	0	-5	m	m
Exp V1 Meye Znoeye	12	18	female	Finished stimuli\JJhappyupeyes.jpg	JJ	happy	yes	yes	1	386	0	6	m	m
Exp V1 Meye Znoeye	12	18	female	Finished stimuli\pf_hap_jumbledeye.jpg	pf	happy	no	yes	1	371	0	-5	m	m
Exp V1 Meye Znoeye	12	18	female	Finished stimuli\wf_fea_jumbled_eyes.jpg	wf	fear	no	yes	0	300	0	5	m	z
Exp V1 Meye Znoeye	12	18	female	Finished stimuli\jjfear_upnoeyes.jpg	jj	fear	yes	no	0	813	0	-5	z	m
Exp V1 Meye Znoeye	12	18	female	Finished stimuli\wf_hap_upeyes.jpg	wf	happy	yes	yes	1	588	0	-5	m	m
Exp V1 Meye Znoeye	12	18	female	Finished stimuli\mo_fear_upeyes.jpg	mo	fear	yes	yes	1	534	0	-5	m	m
Exp V1 Meye Znoeye	12	18	female	Finished stimuli\mo_hap_jumbledeyes.jpg	mo	happy	no	yes	1	367	0	-5	m	m
Exp V1 Meye Znoeye	12	18	female	Finished stimuli\mf_fear_upeye.jpg	mf	fear	yes	yes	0	313	0	6	m	z
Exp V1 Meye Znoeye	12	18	female	Finished stimuli\mf_fear_jumblednoeye.jpg	mf	fear	no	no	1	426	0	5	z	z
Exp V1 Meye Znoeye	12	18	female	Finished stimuli\em_hap_jumblednoeyes.jpg	em	happy	no	no	1	625	0	-5	z	z
Exp V1 Meye Znoeye	12	18	female	Finished stimuli\sw_fear_jumbled_eyes.jpg	sw	fear	no	yes	1	336	0	-5	m	m
Exp V1 Meye Znoeye	12	18	female	Finished stimuli\rhap_jumbled_noeyes.jpg	rh	happy	no	no	0	373	0	-5	z	m
Exp V1 Meye Znoeye	12	18	female	Finished stimuli\JJhappyupnoeyes.jpg	JJ	happy	yes	no	0	287	0	-5	z	m
Exp V1 Meye Znoeye	12	18	female	Finished stimuli\pehappy_jumbled_no_eyes.jpg	pe	happy	no	no	1	500	0	6	z	z
Exp V1 Meye Znoeye	12	18	female	Finished stimuli\mf_happy_jumbled_noeyes.jpg	mf	happy	no	no	0	429	0	6	z	m
Exp V1 Meye Znoeye	12	18	female	Finished stimuli\cc_happy_jumblednoeyes.jpg	cc	happy	no	no	1	1079	0	5	z	z
Exp V1 Meye Znoeye	12	18	female	Finished stimuli\sw_fear_upeyes.jpg	sw	fear	yes	yes	1	199	0	-5	m	m
Exp V1 Meye Znoeye	12	18	female	Finished stimuli\sw_fear_jumbled_noeyes.jpg	sw	fear	no	no	0	330	0	-5	z	m
Exp V1 Meye Znoeye	12	18	female	Finished stimuli\pefear_up_jumbledeyes.jpg	pe	fear	no	yes	1	450	0	5	m	m
Exp V1 Meye Znoeye	12	18	female	Finished stimuli\pefear_upeyes.jpg	pe	fear	yes	yes	1	242	0	6	m	m
Exp V1 Meye Znoeye	12	18	female	Finished stimuli\mf_happy_jumbledeyes.jpg	mf	happy	no	yes	1	454	0	-5	m	m
Exp V1 Meye Znoeye	12	18	female	Finished stimuli\sw_fear_noeyes.jpg	sw	fear	yes	no	1	522	0	6	z	z
Exp V1 Meye Znoeye	12	18	female	Finished stimuli\sw_hap_jumbled_noeyes.jpg	sw	happy	no	no	1	475	0	6	z	z
Exp V1 Meye Znoeye	12	18	female	Finished stimuli\cc_happy_upnoeyes.jpg	cc	happy	yes	no	1	374	0	5	z	z
Exp V1 Meye Znoeye	12	18	female	Finished stimuli\pehappy_jumbled_eyes.jpg	pe	happy	no	yes	0	1321	0	-5	m	z
Exp V1 Meye Znoeye	12	18	female	Finished stimuli\em_fear_noeyes.jpg	em	fear	yes	no	0	502	0	-5	z	m
Exp V1 Meye Znoeye	12	18	female	Finished stimuli\mf_fear_jumbledeye.jpg	mf	fear	no	yes	1	342	0	6	m	m
Exp V1 Meye Znoeye	12	18	female	Finished stimuli\em_fear_jumblednoeyes.jpg	em	fear	no	no	1	383	0	-5	z	z
Exp V1 Meye Znoeye	12	18	female	Finished stimuli\cc_fear_up.jpg	cc	fear	yes	yes	1	529	0	6	m	m
Exp V1 Meye Znoeye	12	18	female	Finished stimuli\cc_fearjumbledno_eye.jpg	cc	fear	no	no	0	1149	0	-5	z	m
Exp V1 Meye Znoeye	12	18	female	Finished stimuli\rhap_jumbledeyes.jpg	rh	happy	no	yes	1	270	0	6	m	m
Exp V1 Meye Znoeye	12	18	female	Finished stimuli\pf_fear_upeyes.jpg	pf	fear	yes	yes	1	326	0	6	m	m
Exp V1 Meye Znoeye	12	18	female	Finished stimuli\em_fear_jumbledeyes.jpg	em	fear	no	yes	1	342	0	6	m	m
Exp V1 Meye Znoeye	12	18	female	Finished stimuli\sw_fear_noeyes.jpg	sw	fear	yes	no	1	272	0	6	z	z
Exp V1 Meye Znoeye	12	18	female	Finished stimuli\sw_fear_jumbled_eyes.jpg	sw	fear	no	yes	1	304	0	5	m	m
Exp V1 Meye Znoeye	12	18	female	Finished stimuli\mo_hap_jumblednoeyes.jpg	mo	happy	no	no	1	361	0	5	z	z
Exp V1 Meye Znoeye	12	18	female	Finished stimuli\pf_hap_up_noeye.jpg	pf	happy	yes	no	1	427	0	-5	z	z
Exp V1 Meye Znoeye	12	18	female	Finished stimuli\sw_hap_jumbledeyes.jpg	sw	happy	no	yes	1	258	0	6	m	m
Exp V1 Meye Znoeye	12	18	female	Finished stimuli\jjfear_jumbledeyes.jpg	jj	fear	no	yes	1	275	0	6	m	m
Exp V1 Meye Znoeye	12	18	female	Finished stimuli\sw_fear_upeyes.jpg	sw	fear	yes	yes	1	539	0	-5	m	m
Exp V1 Meye Znoeye	12	18	female	Finished stimuli\mo_fear_jumblednoeyes.jpg	mo	fear	no	no	1	288	0	-5	z	z
Exp V1 Meye Znoeye	12	18	female	Finished stimuli\em_fear_noeyes.jpg	em	fear	yes	no	1	392	0	-5	z	z
Exp V1 Meye Znoeye	12	18	female	Finished stimuli\JJhappyjumblednoeyes.jpg	JJ	happy	no	yes	0	453	0	5	m	z
Exp V1 Meye Znoeye	12	18	female	Finished stimuli\pehappy_jumbled_no_eyes.jpg	pe	happy	no	no	1	413	0	-5	z	z
Exp V1 Meye Znoeye	12	18	female	Finished stimuli\em_hap_jumblednoeyes.jpg	em	happy	no	no	1	696	0	-5	z	z
Exp V1 Meye Znoeye	12	18	female	Finished stimuli\sw_hap_noeyes.jpg	sw	happy	yes	no	0	384	0	6	z	m
Exp V1 Meye Znoeye	12	18	female	Finished stimuli\mf_happy_jumbled_noeyes.jpg	mf	happy	no	no	0	351	0	-5	z	m
Exp V1 Meye Znoeye	12	18	female	Finished stimuli\cc_fear_up.jpg	cc	fear	yes	yes	1	513	0	6	m	m
Exp V1 Meye Znoeye	12	18	female	Finished stimuli\cc_happy_upnoeyes.jpg	cc	happy	yes	no	1	433	0	-5	z	z
Exp V1 Meye Znoeye	12	18	female	Finished stimuli\rfear_jumbledeyess.jpg	rf	fear	no	yes	1	388	0	5	m	m
Exp V1 Meye Znoeye	12	18	female	Finished stimuli\pf_fear_jumbledeyes.jpg	pf	fear	no	yes	1	234	0	-5	m	m
Exp V1 Meye Znoeye	12	18	female	Finished stimuli\wf_hap_jumbled_noeyes.jpg	wf	happy	no	no	1	445	0	6	z	z
Exp V1 Meye Znoeye	12	18	female	Finished stimuli\mo_hap_up_noeyes.jpg	mo	happy	yes	no	0	549	0	-5	z	m
Exp V1 Meye Znoeye	12	18	female	Finished stimuli\wf_hap_jumbledeyes.jpg	wf	happy	no	yes	1	550	0	5	z	z
Exp V1 Meye Znoeye	12	18	female	Finished stimuli\em_fear_upeyes.jpg	em	fear	yes	yes	1	440	0	6	m	m
Exp V1 Meye Znoeye	12	18	female	Finished stimuli\em_hap_upeyes.jpg	em	happy	yes	yes	0	468	0	-5	m	z
Exp V1 Meye Znoeye	12	18	female	Finished stimuli\sw_hap_upeyes.jpg	sw	happy	yes	yes	1	336	0	6	m	m
Exp V1 Meye Znoeye	12	18	female	Finished stimuli\cc_fear_noeyes.jpg	cc	fear	yes	no	1	453	0	-5	z	z
Exp V1 Meye Znoeye	12	18	female	Finished stimuli\mo_fear_upnoeyes.jpg	mo	fear	yes	no	0	581	0	-5	m	z
Exp V1 Meye Znoeye	12	18	female	Finished stimuli\wf_fea_jumbled_eyes.jpg	wf	fear	no	yes	1	382	0	-5	m	m
Exp V1 Meye Znoeye	12	18	female	Finished stimuli\mf_fear_up_noeye.jpg	mf	fear	yes	no	1	876	0	5	z	z
Exp V1 Meye Znoeye	12	18	female	Finished stimuli\pefear_upeyes.jpg	pe	fear	yes	yes	1	369	0	-5	m	m
Exp V1 Meye Znoeye	12	18	female	Finished stimuli\cc_fear_jumbledeyes.jpg	cc	fear	no	yes	1	367	0	6	m	m
Exp V1 Meye Znoeye	12	18	female	Finished stimuli\em_hap_jumbledeyes.jpg	em	happy	no	yes	1	517	0	-5	m	m
Exp V1 Meye Znoeye	12	18	female	Finished stimuli\pehappy_upeyes.jpg	pe	happy	yes	yes	1	402	0	-5	m	m
Exp V1 Meye Znoeye	12	18	female	Finished stimuli\mo_fear_jumbledeyes.jpg	mo	fear	no	yes	1	609	0	-5	m	m
Exp V1 Meye Znoeye	12	18	female	Finished stimuli\wf_hap_upeyes.jpg	wf	happy	yes	yes	0	315	0	6	m	z
Exp V1 Meye Znoeye	12	18	female	Finished stimuli\pefear_up_noeyes.jpg	pe	fear	yes	no	1	355	0	6	z	z
Exp V1 Meye Znoeye	12	18	female	Finished stimuli\mf_fear_jumbledeye.jpg	mf	fear	no	yes	1	242	0	6	m	m
Exp V1 Meye Znoeye	12	18	female	Finished stimuli\rhap_noeyes.jpg	rh	happy	yes	no	0	221	0	-5	z	m
Exp V1 Meye Znoeye	12	18	female	Finished stimuli\pefear_up_jumbled_noeyes.jpg	pe	fear	no	no	0	312	0	-5	z	m
Exp V1 Meye Znoeye	12	18	female	Finished stimuli\rhap.jpg	rh	happy	yes	yes	1	421	0	-5	m	m
Exp V1 Meye Znoeye	12	18	female	Finished stimuli\em_fear_jumblednoeyes.jpg	em	fear	no	no	1	399	0	5	z	z
Exp V1 Meye Znoeye	12	18	female	Finished stimuli\wf_hap_upeyes.jpg	wf	happy	yes	yes	1	342	0	-5	m	m
Exp V1 Meye Znoeye	12	18	female	Finished stimuli\rhap_jumbled_noeyes.jpg	rh	happy	no	no	1	599	0	-5	z	z
Exp V1 Meye Znoeye	12	18	female	Finished stimuli\wf_fea_jumbled_noeyes.jpg	wf	fear	no	no	0	769	0	6	z	m
Exp V1 Meye Znoeye	12	18	female	Finished stimuli\wf_fea_up_noeyes.jpg	wf	fear	yes	no	0	346	0	5	z	m
Exp V1 Meye Znoeye	12	18	female	Finished stimuli\pefear_up_jumbledeyes.jpg	pe	fear	no	yes	1	512	0	-5	m	m
Exp V1 Meye Znoeye	12	18	female	Finished stimuli\jjhap_jumbledeyes.jpg	jj	happy	no	yes	1	281	0	-5	m	m
Exp V1 Meye Znoeye	12	18	female	Finished stimuli\wf_fea_up eyes.jpg	wf	fear	yes	yes	1	321	0	-5	m	m
Exp V1 Meye Znoeye	12	18	female	Finished stimuli\cc_happy_upeyes.jpg	cc	happy	yes	yes	1	434	0	-5	m	m
Exp V1 Meye Znoeye	12	18	female	Finished stimuli\pf_fear_up_noeyes.jpg	pf	fear	yes	no	1	673	0	-5	z	z
Exp V1 Meye Znoeye	12	18	female	Finished stimuli\em_hap_noeyes.jpg	em	happy	yes	no	0	361	0	-5	z	m
Exp V1 Meye Znoeye	12	18	female	Finished stimuli\pehappy_noeyes.jpg	pe	happy	yes	no	0	687	0	-5	z	m
Exp V1 Meye Znoeye	12	18	female	Finished stimuli\mf_happy_upno_eyes.jpg	mf	happy	yes	no	0	688	0	6	z	m
Exp V1 Meye Znoeye	12	18	female	Finished stimuli\mf_happy_jumbledeyes.jpg	mf	happy	no	yes	1	1007	0	-5	m	m
Exp V1 Meye Znoeye	12	18	female	Finished stimuli\rfear_jumbled_noeyess.jpg	rf	fear	no	no	1	273	0	5	z	z
Exp V1 Meye Znoeye	12	18	female	Finished stimuli\JJhappyupeyes.jpg	JJ	happy	yes	yes	1	386	0	-5	m	m
Exp V1 Meye Znoeye	12	18	female	Finished stimuli\mo_fear_upeyes.jpg	mo	fear	yes	yes	1	356	0	-5	m	m
Exp V1 Meye Znoeye	12	18	female	Finished stimuli\rfear_upeys.jpg	rf	fear	yes	yes	1	198	0	-5	m	m
Exp V1 Meye Znoeye	12	18	female	Finished stimuli\cc_happy_jumblednoeyes.jpg	cc	happy	no	no	1	356	0	-5	z	z
Exp V1 Meye Znoeye	12	18	female	Finished stimuli\pf_fear_jumbled_noeyes.jpg	pf	fear	no	no	0	285	0	5	z	m
Exp V1 Meye Znoeye	12	18	female	Finished stimuli\pehappy_jumbled_eyes.jpg	pe	happy	no	yes	1	174	0	6	m	m
Exp V1 Meye Znoeye	12	18	female	Finished stimuli\cc_happy_jumbledeyes.jpg	cc	happy	no	yes	1	847	0	5	m	m
Exp V1 Meye Znoeye	12	18	female	Finished stimuli\jjfear_jumblednoeyes.jpg	jj	fear	no	no	1	571	0	-5	z	z
Exp V1 Meye Znoeye	12	18	female	Finished stimuli\pf_hap_upeye.jpg	pf	happy	yes	yes	1	365	0	-5	m	m
Exp V1 Meye Znoeye	12	18	female	Finished stimuli\JJhappyupnoeyes.jpg	JJ	happy	yes	no	0	210	0	5	z	m
Exp V1 Meye Znoeye	12	18	female	Finished stimuli\jjfear_upnoeyes.jpg	jj	fear	yes	no	0	233	0	-5	z	m
Exp V1 Meye Znoeye	12	18	female	Finished stimuli\mf_happy_upeyes.jpg	mf	happy	yes	yes	1	204	0	5	m	m
Exp V1 Meye Znoeye	12	18	female	Finished stimuli\sw_fear_jumbled_noeyes.jpg	sw	fear	no	no	0	227	0	5	z	m
Exp V1 Meye Znoeye	12	18	female	Finished stimuli\jjfear_upeyes.jpg	jj	fear	yes	yes	1	495	0	-5	m	m
Exp V1 Meye Znoeye	12	18	female	Finished stimuli\mf_fear_upeye.jpg	mf	fear	yes	yes	1	324	0	6	m	m
Exp V1 Meye Znoeye	12	18	female	Finished stimuli\rfear_up_noeys.jpg	rf	fear	yes	no	0	317	0	-5	z	m
Exp V1 Meye Znoeye	12	18	female	Finished stimuli\pf_hap_jumbled_noeye.jpg	pf	happy	no	no	0	357	0	-5	z	m
Exp V1 Meye Znoeye	12	18	female	Finished stimuli\wf_hap_up_noeyes.jpg	wf	happy	yes	no	1	471	0	6	m	m
Exp V1 Meye Znoeye	12	18	female	Finished stimuli\pf_hap_jumbledeye.jpg	pf	happy	no	yes	1	367	0	-5	m	m
Exp V1 Meye Znoeye	12	18	female	Finished stimuli\mf_fear_jumblednoeye.jpg	mf	fear	no	no	0	525	0	-5	z	m
Exp V1 Meye Znoeye	12	18	female	Finished stimuli\mo_hap_jumbledeyes.jpg	mo	happy	no	yes	0	362	0	-5	m	z
Exp V1 Meye Znoeye	12	18	female	Finished stimuli\sw_hap_jumbled_noeyes.jpg	sw	happy	no	no	1	328	0	-5	z	z
Exp V1 Meye Znoeye	12	18	female	Finished stimuli\mo_hap_upeyes.jpg	mo	happy	yes	yes	1	301	0	-5	m	m
Exp V1 Meye Znoeye	12	18	female	Finished stimuli\jjhap_jumbledeyes.jpg	jj	happy	no	yes	0	890	0	-5	m	z
Exp V1 Meye Znoeye	12	18	female	Finished stimuli\sw_hap_noeyes.jpg	sw	happy	yes	no	0	171	0	-5	z	m
Exp V1 Meye Znoeye	12	18	female	Finished stimuli\pefear_up_noeyes.jpg	pe	fear	yes	no	1	813	0	-5	z	z
Exp V1 Meye Znoeye	12	18	female	Finished stimuli\cc_fear_jumbledeyes.jpg	cc	fear	no	yes	1	288	0	-5	m	m
Exp V1 Meye Znoeye	12	18	female	Finished stimuli\pehappy_noeyes.jpg	pe	happy	yes	no	1	912	0	-5	z	z
Exp V1 Meye Znoeye	12	18	female	Finished stimuli\sw_fear_jumbled_eyes.jpg	sw	fear	no	yes	1	301	0	-5	m	m
Exp V1 Meye Znoeye	12	18	female	Finished stimuli\sw_fear_upeyes.jpg	sw	fear	yes	yes	1	233	0	-5	m	m
Exp V1 Meye Znoeye	12	18	female	Finished stimuli\wf_fea_jumbled_eyes.jpg	wf	fear	no	yes	1	452	0	6	m	m
Exp V1 Meye Znoeye	12	18	female	Finished stimuli\em_fear_jumblednoeyes.jpg	em	fear	no	no	1	579	0	-5	z	z
Exp V1 Meye Znoeye	12	18	female	Finished stimuli\em_hap_jumbledeyes.jpg	em	happy	no	yes	1	349	0	6	m	m
Exp V1 Meye Znoeye	12	18	female	Finished stimuli\jjfear_jumbledeyes.jpg	jj	fear	no	yes	1	339	0	-5	m	m
Exp V1 Meye Znoeye	12	18	female	Finished stimuli\pf_hap_jumbledeye.jpg	pf	happy	no	yes	1	372	0	-5	m	m
Exp V1 Meye Znoeye	12	18	female	Finished stimuli\JJhappyjumblednoeyes.jpg	JJ	happy	no	yes	1	386	0	-5	m	m
Exp V1 Meye Znoeye	12	18	female	Finished stimuli\cc_happy_jumbledeyes.jpg	cc	happy	no	yes	1	424	0	6	m	m
Exp V1 Meye Znoeye	12	18	female	Finished stimuli\sw_hap_jumbled_noeyes.jpg	sw	happy	no	no	1	352	0	6	z	z
Exp V1 Meye Znoeye	12	18	female	Finished stimuli\em_fear_upeyes.jpg	em	fear	yes	yes	1	361	0	5	m	m
Exp V1 Meye Znoeye	12	18	female	Finished stimuli\mf_happy_jumbled_noeyes.jpg	mf	happy	no	no	0	203	0	5	z	m
Exp V1 Meye Znoeye	12	18	female	Finished stimuli\rhap.jpg	rh	happy	yes	yes	1	278	0	-5	m	m
Exp V1 Meye Znoeye	12	18	female	Finished stimuli\pehappy_upeyes.jpg	pe	happy	yes	yes	1	229	0	-5	m	m
Exp V1 Meye Znoeye	12	18	female	Finished stimuli\wf_fea_up_noeyes.jpg	wf	fear	yes	no	0	444	0	6	z	m
Exp V1 Meye Znoeye	12	18	female	Finished stimuli\cc_fear_noeyes.jpg	cc	fear	yes	no	1	316	0	-5	z	z
Exp V1 Meye Znoeye	12	18	female	Finished stimuli\mo_hap_up_noeyes.jpg	mo	happy	yes	no	0	405	0	6	z	m
Exp V1 Meye Znoeye	12	18	female	Finished stimuli\wf_fea_jumbled_noeyes.jpg	wf	fear	no	no	0	783	0	6	z	m
Exp V1 Meye Znoeye	12	18	female	Finished stimuli\mo_fear_jumbledeyes.jpg	mo	fear	no	yes	1	406	0	-5	m	m
Exp V1 Meye Znoeye	12	18	female	Finished stimuli\sw_fear_noeyes.jpg	sw	fear	yes	no	1	512	0	6	z	z
Exp V1 Meye Znoeye	12	18	female	Finished stimuli\pf_fear_upeyes.jpg	pf	fear	yes	yes	1	473	0	-5	m	m
Exp V1 Meye Znoeye	12	18	female	Finished stimuli\pefear_up_jumbled_noeyes.jpg	pe	fear	no	no	1	785	0	6	z	z
Exp V1 Meye Znoeye	12	18	female	Finished stimuli\mf_fear_up_noeye.jpg	mf	fear	yes	no	1	547	0	-5	z	z
Exp V1 Meye Znoeye	12	18	female	Finished stimuli\rfear_jumbled_noeyess.jpg	rf	fear	no	no	0	505	0	-5	z	m
Exp V1 Meye Znoeye	12	18	female	Finished stimuli\pefear_up_jumbledeyes.jpg	pe	fear	no	yes	1	277	0	6	m	m
Exp V1 Meye Znoeye	12	18	female	Finished stimuli\cc_happy_upeyes.jpg	cc	happy	yes	yes	1	350	0	-5	m	m
Exp V1 Meye Znoeye	12	18	female	Finished stimuli\em_fear_noeyes.jpg	em	fear	yes	no	0	383	0	6	z	m
Exp V1 Meye Znoeye	12	18	female	Finished stimuli\jjfear_upnoeyes.jpg	jj	fear	yes	no	0	366	0	6	z	m
Exp V1 Meye Znoeye	12	18	female	Finished stimuli\pehappy_jumbled_eyes.jpg	pe	happy	no	yes	1	328	0	-5	m	m
Exp V1 Meye Znoeye	12	18	female	Finished stimuli\mo_hap_jumblednoeyes.jpg	mo	happy	no	no	1	1804	0	-5	z	z
Exp V1 Meye Znoeye	12	18	female	Finished stimuli\sw_fear_jumbled_noeyes.jpg	sw	fear	no	no	1	674	0	6	z	z
Exp V1 Meye Znoeye	12	18	female	Finished stimuli\JJhappyupnoeyes.jpg	JJ	happy	yes	no	0	322	0	-5	z	m
Exp V1 Meye Znoeye	12	18	female	Finished stimuli\rfear_upeys.jpg	rf	fear	yes	yes	1	411	0	6	m	m
Exp V1 Meye Znoeye	12	18	female	Finished stimuli\JJhappyupeyes.jpg	JJ	happy	yes	yes	1	682	0	-5	m	m
Exp V1 Meye Znoeye	12	18	female	Finished stimuli\cc_fear_up.jpg	cc	fear	yes	yes	1	323	0	-5	m	m
Exp V1 Meye Znoeye	12	18	female	Finished stimuli\sw_hap_jumbledeyes.jpg	sw	happy	no	yes	1	236	0	-5	m	m
Exp V1 Meye Znoeye	12	18	female	Finished stimuli\jjfear_upeyes.jpg	jj	fear	yes	yes	1	175	0	6	m	m
Exp V1 Meye Znoeye	12	18	female	Finished stimuli\mf_fear_upeye.jpg	mf	fear	yes	yes	1	230	0	-5	m	m
Exp V1 Meye Znoeye	12	18	female	Finished stimuli\mo_hap_jumbledeyes.jpg	mo	happy	no	yes	1	220	0	-5	m	m
Exp V1 Meye Znoeye	12	18	female	Finished stimuli\mf_fear_jumbledeye.jpg	mf	fear	no	yes	1	287	0	-5	m	m
Exp V1 Meye Znoeye	12	18	female	Finished stimuli\wf_fea_up eyes.jpg	wf	fear	yes	yes	1	171	0	-5	m	m
Exp V1 Meye Znoeye	12	18	female	Finished stimuli\wf_hap_upeyes.jpg	wf	happy	yes	yes	1	41	0	-5	m	m
Exp V1 Meye Znoeye	12	18	female	Finished stimuli\wf_hap_jumbledeyes.jpg	wf	happy	no	yes	0	168	0	-5	z	m
Exp V1 Meye Znoeye	12	18	female	Finished stimuli\mo_fear_jumblednoeyes.jpg	mo	fear	no	no	0	130	0	6	z	m
Exp V1 Meye Znoeye	12	18	female	Finished stimuli\sw_hap_upeyes.jpg	sw	happy	yes	yes	1	439	0	-5	m	m
Exp V1 Meye Znoeye	12	18	female	Finished stimuli\pefear_upeyes.jpg	pe	fear	yes	yes	1	454	0	6	m	m
Exp V1 Meye Znoeye	12	18	female	Finished stimuli\pf_hap_upeye.jpg	pf	happy	yes	yes	1	478	0	-5	m	m
Exp V1 Meye Znoeye	12	18	female	Finished stimuli\pf_fear_jumbledeyes.jpg	pf	fear	no	yes	0	247	0	6	m	z
Exp V1 Meye Znoeye	12	18	female	Finished stimuli\em_hap_upeyes.jpg	em	happy	yes	yes	0	861	0	-5	m	z
Exp V1 Meye Znoeye	12	18	female	Finished stimuli\rfear_jumbledeyess.jpg	rf	fear	no	yes	0	353	0	-5	m	z
Exp V1 Meye Znoeye	12	18	female	Finished stimuli\pf_hap_up_noeye.jpg	pf	happy	yes	no	1	399	0	-5	z	z
Exp V1 Meye Znoeye	12	18	female	Finished stimuli\mo_fear_upeyes.jpg	mo	fear	yes	yes	1	329	0	5	m	m
Exp V1 Meye Znoeye	12	18	female	Finished stimuli\rhap_jumbled_noeyes.jpg	rh	happy	no	no	1	298	0	5	z	z
Exp V1 Meye Znoeye	12	18	female	Finished stimuli\wf_hap_up_noeyes.jpg	wf	happy	yes	no	1	283	0	-5	m	m
Exp V1 Meye Znoeye	12	18	female	Finished stimuli\pf_fear_jumbled_noeyes.jpg	pf	fear	no	no	0	803	0	-5	z	m
Exp V1 Meye Znoeye	12	18	female	Finished stimuli\rfear_up_noeys.jpg	rf	fear	yes	no	1	962	0	-5	z	z
Exp V1 Meye Znoeye	12	18	female	Finished stimuli\mf_happy_upeyes.jpg	mf	happy	yes	yes	0	179	0	-5	m	z
Exp V1 Meye Znoeye	12	18	female	Finished stimuli\wf_hap_jumbled_noeyes.jpg	wf	happy	no	no	1	505	0	-5	z	z
Exp V1 Meye Znoeye	12	18	female	Finished stimuli\pf_fear_up_noeyes.jpg	pf	fear	yes	no	1	582	0	6	z	z
Exp V1 Meye Znoeye	12	18	female	Finished stimuli\mo_hap_upeyes.jpg	mo	happy	yes	yes	1	240	0	-5	m	m
Exp V1 Meye Znoeye	12	18	female	Finished stimuli\wf_hap_upeyes.jpg	wf	happy	yes	yes	1	208	0	6	m	m
Exp V1 Meye Znoeye	12	18	female	Finished stimuli\mf_fear_jumblednoeye.jpg	mf	fear	no	no	0	170	0	5	z	m
Exp V1 Meye Znoeye	12	18	female	Finished stimuli\mo_fear_upnoeyes.jpg	mo	fear	yes	no	0	369	0	6	m	z
Exp V1 Meye Znoeye	12	18	female	Finished stimuli\em_fear_jumbledeyes.jpg	em	fear	no	yes	1	307	0	-5	m	m
Exp V1 Meye Znoeye	12	18	female	Finished stimuli\mf_happy_jumbledeyes.jpg	mf	happy	no	yes	0	828	0	6	m	z
Exp V1 Meye Znoeye	12	18	female	Finished stimuli\em_hap_jumblednoeyes.jpg	em	happy	no	no	1	1325	0	5	z	z
Exp V1 Meye Znoeye	12	18	female	Finished stimuli\jjfear_jumblednoeyes.jpg	jj	fear	no	no	1	366	0	5	z	z
Exp V1 Meye Znoeye	12	18	female	Finished stimuli\cc_happy_upnoeyes.jpg	cc	happy	yes	no	1	248	0	5	z	z
Exp V1 Meye Znoeye	12	18	female	Finished stimuli\pehappy_jumbled_no_eyes.jpg	pe	happy	no	no	1	360	0	-5	z	z
Exp V1 Meye Znoeye	12	18	female	Finished stimuli\cc_fearjumbledno_eye.jpg	cc	fear	no	no	0	710	0	-5	z	m
Exp V1 Meye Znoeye	12	18	female	Finished stimuli\mf_happy_upno_eyes.jpg	mf	happy	yes	no	1	411	0	-5	z	z
Exp V1 Meye Znoeye	12	18	female	Finished stimuli\rhap_noeyes.jpg	rh	happy	yes	no	0	218	0	-5	z	m
Exp V1 Meye Znoeye	12	18	female	Finished stimuli\pf_hap_jumbled_noeye.jpg	pf	happy	no	no	1	796	0	6	z	z
Exp V1 Meye Znoeye	12	18	female	Finished stimuli\rhap_jumbledeyes.jpg	rh	happy	no	yes	1	430	0	-5	m	m
Exp V1 Meye Znoeye	12	18	female	Finished stimuli\em_hap_noeyes.jpg	em	happy	yes	no	1	565	0	6	z	z
Exp V1 Meye Znoeye	12	18	female	Finished stimuli\cc_happy_jumblednoeyes.jpg	cc	happy	no	no	0	1052	0	6	z	m
Exp V1 Meye Znoeye	14	18	female	Finished stimuli\em_fear_upeyes.jpg	em	fear	yes	yes	1	338	0	-5	m	m
Exp V1 Meye Znoeye	14	18	female	Finished stimuli\sw_fear_noeyes.jpg	sw	fear	yes	no	1	493	0	-5	z	z
Exp V1 Meye Znoeye	14	18	female	Finished stimuli\mf_happy_upeyes.jpg	mf	happy	yes	yes	1	378	0	-4	m	m
Exp V1 Meye Znoeye	14	18	female	Finished stimuli\wf_hap_upeyes.jpg	wf	happy	yes	yes	1	538	0	-5	m	m
Exp V1 Meye Znoeye	14	18	female	Finished stimuli\wf_fea_up_noeyes.jpg	wf	fear	yes	no	1	404	0	-5	z	z
Exp V1 Meye Znoeye	14	18	female	Finished stimuli\rfear_jumbledeyess.jpg	rf	fear	no	yes	1	355	0	-4	m	m
Exp V1 Meye Znoeye	14	18	female	Finished stimuli\em_hap_jumbledeyes.jpg	em	happy	no	yes	1	508	0	-4	m	m
Exp V1 Meye Znoeye	14	18	female	Finished stimuli\wf_hap_jumbled_noeyes.jpg	wf	happy	no	no	1	551	0	-5	z	z
Exp V1 Meye Znoeye	14	18	female	Finished stimuli\wf_hap_upeyes.jpg	wf	happy	yes	yes	1	488	0	-5	m	m
Exp V1 Meye Znoeye	14	18	female	Finished stimuli\sw_fear_jumbled_noeyes.jpg	sw	fear	no	no	1	568	0	-4	z	z
Exp V1 Meye Znoeye	14	18	female	Finished stimuli\pf_fear_upeyes.jpg	pf	fear	yes	yes	1	328	0	-4	m	m
Exp V1 Meye Znoeye	14	18	female	Finished stimuli\sw_fear_upeyes.jpg	sw	fear	yes	yes	1	407	0	-5	m	m
Exp V1 Meye Znoeye	14	18	female	Finished stimuli\pehappy_upeyes.jpg	pe	happy	yes	yes	1	433	0	-5	m	m
Exp V1 Meye Znoeye	14	18	female	Finished stimuli\sw_hap_noeyes.jpg	sw	happy	yes	no	1	529	0	-4	z	z
Exp V1 Meye Znoeye	14	18	female	Finished stimuli\mf_fear_up_noeye.jpg	mf	fear	yes	no	1	489	0	-5	z	z
Exp V1 Meye Znoeye	14	18	female	Finished stimuli\wf_hap_up_noeyes.jpg	wf	happy	yes	no	0	573	0	-5	m	z
Exp V1 Meye Znoeye	14	18	female	Finished stimuli\mf_happy_jumbledeyes.jpg	mf	happy	no	yes	1	344	0	-5	m	m
Exp V1 Meye Znoeye	14	18	female	Finished stimuli\jjfear_upnoeyes.jpg	jj	fear	yes	no	1	613	0	-5	z	z
Exp V1 Meye Znoeye	14	18	female	Finished stimuli\jjfear_jumblednoeyes.jpg	jj	fear	no	no	1	695	0	-5	z	z
Exp V1 Meye Znoeye	14	18	female	Finished stimuli\pefear_up_noeyes.jpg	pe	fear	yes	no	1	595	0	-5	z	z
Exp V1 Meye Znoeye	14	18	female	Finished stimuli\mf_fear_jumblednoeye.jpg	mf	fear	no	no	0	673	0	-5	z	m
Exp V1 Meye Znoeye	14	18	female	Finished stimuli\mo_hap_jumblednoeyes.jpg	mo	happy	no	no	1	745	0	-5	z	z
Exp V1 Meye Znoeye	14	18	female	Finished stimuli\mf_happy_upno_eyes.jpg	mf	happy	yes	no	1	975	0	-5	z	z
Exp V1 Meye Znoeye	14	18	female	Finished stimuli\pefear_up_jumbled_noeyes.jpg	pe	fear	no	no	0	397	0	-5	z	m
Exp V1 Meye Znoeye	14	18	female	Finished stimuli\rfear_upeys.jpg	rf	fear	yes	yes	1	435	0	-5	m	m
Exp V1 Meye Znoeye	14	18	female	Finished stimuli\em_fear_jumblednoeyes.jpg	em	fear	no	no	1	494	0	-5	z	z
Exp V1 Meye Znoeye	14	18	female	Finished stimuli\mf_fear_jumbledeye.jpg	mf	fear	no	yes	1	362	0	-5	m	m
Exp V1 Meye Znoeye	14	18	female	Finished stimuli\mo_fear_jumbledeyes.jpg	mo	fear	no	yes	1	445	0	-5	m	m
Exp V1 Meye Znoeye	14	18	female	Finished stimuli\pf_hap_upeye.jpg	pf	happy	yes	yes	1	419	0	-5	m	m
Exp V1 Meye Znoeye	14	18	female	Finished stimuli\wf_fea_jumbled_eyes.jpg	wf	fear	no	yes	1	759	0	-4	m	m
Exp V1 Meye Znoeye	14	18	female	Finished stimuli\wf_hap_jumbledeyes.jpg	wf	happy	no	yes	0	528	0	-5	z	m
Exp V1 Meye Znoeye	14	18	female	Finished stimuli\em_fear_jumbledeyes.jpg	em	fear	no	yes	1	449	0	-5	m	m
Exp V1 Meye Znoeye	14	18	female	Finished stimuli\pehappy_jumbled_no_eyes.jpg	pe	happy	no	no	1	516	0	-5	z	z
Exp V1 Meye Znoeye	14	18	female	Finished stimuli\pf_fear_up_noeyes.jpg	pf	fear	yes	no	1	481	0	-5	z	z
Exp V1 Meye Znoeye	14	18	female	Finished stimuli\cc_fear_up.jpg	cc	fear	yes	yes	1	382	0	-5	m	m
Exp V1 Meye Znoeye	14	18	female	Finished stimuli\rhap_noeyes.jpg	rh	happy	yes	no	1	620	0	-5	z	z
Exp V1 Meye Znoeye	14	18	female	Finished stimuli\rfear_up_noeys.jpg	rf	fear	yes	no	1	736	0	-5	z	z
Exp V1 Meye Znoeye	14	18	female	Finished stimuli\rhap.jpg	rh	happy	yes	yes	1	313	0	-5	m	m
Exp V1 Meye Znoeye	14	18	female	Finished stimuli\cc_happy_upnoeyes.jpg	cc	happy	yes	no	1	426	0	-5	z	z
Exp V1 Meye Znoeye	14	18	female	Finished stimuli\em_fear_noeyes.jpg	em	fear	yes	no	0	561	0	-5	z	m
Exp V1 Meye Znoeye	14	18	female	Finished stimuli\mo_hap_jumbledeyes.jpg	mo	happy	no	yes	1	330	0	-5	m	m
Exp V1 Meye Znoeye	14	18	female	Finished stimuli\pf_hap_up_noeye.jpg	pf	happy	yes	no	1	431	0	-5	z	z
Exp V1 Meye Znoeye	14	18	female	Finished stimuli\mo_fear_upnoeyes.jpg	mo	fear	yes	no	1	556	0	-5	m	m
Exp V1 Meye Znoeye	14	18	female	Finished stimuli\cc_fear_noeyes.jpg	cc	fear	yes	no	1	439	0	-5	z	z
Exp V1 Meye Znoeye	14	18	female	Finished stimuli\sw_hap_jumbledeyes.jpg	sw	happy	no	yes	1	462	0	-5	m	m
Exp V1 Meye Znoeye	14	18	female	Finished stimuli\pf_hap_jumbled_noeye.jpg	pf	happy	no	no	1	510	0	-5	z	z
Exp V1 Meye Znoeye	14	18	female	Finished stimuli\jjfear_jumbledeyes.jpg	jj	fear	no	yes	1	370	0	-5	m	m
Exp V1 Meye Znoeye	14	18	female	Finished stimuli\mo_hap_upeyes.jpg	mo	happy	yes	yes	1	456	0	-5	m	m
Exp V1 Meye Znoeye	14	18	female	Finished stimuli\mo_fear_jumblednoeyes.jpg	mo	fear	no	no	1	463	0	-5	z	z
Exp V1 Meye Znoeye	14	18	female	Finished stimuli\jjfear_upeyes.jpg	jj	fear	yes	yes	1	343	0	-5	m	m
Exp V1 Meye Znoeye	14	18	female	Finished stimuli\rfear_jumbled_noeyess.jpg	rf	fear	no	no	1	636	0	-5	z	z
Exp V1 Meye Znoeye	14	18	female	Finished stimuli\jjhap_jumbledeyes.jpg	jj	happy	no	yes	1	338	0	-5	m	m
Exp V1 Meye Znoeye	14	18	female	Finished stimuli\JJhappyupeyes.jpg	JJ	happy	yes	yes	1	451	0	-5	m	m
Exp V1 Meye Znoeye	14	18	female	Finished stimuli\wf_fea_up eyes.jpg	wf	fear	yes	yes	1	439	0	-5	m	m
Exp V1 Meye Znoeye	14	18	female	Finished stimuli\JJhappyjumblednoeyes.jpg	JJ	happy	no	yes	0	366	0	-5	m	z
Exp V1 Meye Znoeye	14	18	female	Finished stimuli\cc_fearjumbledno_eye.jpg	cc	fear	no	no	1	484	0	-5	z	z
Exp V1 Meye Znoeye	14	18	female	Finished stimuli\JJhappyupnoeyes.jpg	JJ	happy	yes	no	1	588	0	-5	z	z
Exp V1 Meye Znoeye	14	18	female	Finished stimuli\cc_happy_jumbledeyes.jpg	cc	happy	no	yes	1	574	0	-5	m	m
Exp V1 Meye Znoeye	14	18	female	Finished stimuli\em_hap_noeyes.jpg	em	happy	yes	no	1	424	0	-5	z	z
Exp V1 Meye Znoeye	14	18	female	Finished stimuli\rhap_jumbledeyes.jpg	rh	happy	no	yes	1	583	0	-5	m	m
Exp V1 Meye Znoeye	14	18	female	Finished stimuli\pefear_up_jumbledeyes.jpg	pe	fear	no	yes	1	504	0	-5	m	m
Exp V1 Meye Znoeye	14	18	female	Finished stimuli\pf_fear_jumbledeyes.jpg	pf	fear	no	yes	1	668	0	-5	m	m
Exp V1 Meye Znoeye	14	18	female	Finished stimuli\pf_fear_jumbled_noeyes.jpg	pf	fear	no	no	1	524	0	-5	z	z
Exp V1 Meye Znoeye	14	18	female	Finished stimuli\pefear_upeyes.jpg	pe	fear	yes	yes	1	365	0	-5	m	m
Exp V1 Meye Znoeye	14	18	female	Finished stimuli\wf_fea_jumbled_noeyes.jpg	wf	fear	no	no	1	519	0	-5	z	z
Exp V1 Meye Znoeye	14	18	female	Finished stimuli\cc_happy_upeyes.jpg	cc	happy	yes	yes	1	335	0	-5	m	m
Exp V1 Meye Znoeye	14	18	female	Finished stimuli\pehappy_noeyes.jpg	pe	happy	yes	no	1	635	0	-5	z	z
Exp V1 Meye Znoeye	14	18	female	Finished stimuli\em_hap_upeyes.jpg	em	happy	yes	yes	1	370	0	-5	m	m
Exp V1 Meye Znoeye	14	18	female	Finished stimuli\cc_fear_jumbledeyes.jpg	cc	fear	no	yes	1	343	0	-5	m	m
Exp V1 Meye Znoeye	14	18	female	Finished stimuli\em_hap_jumblednoeyes.jpg	em	happy	no	no	1	441	0	-5	z	z
Exp V1 Meye Znoeye	14	18	female	Finished stimuli\cc_happy_jumblednoeyes.jpg	cc	happy	no	no	1	472	0	-5	z	z
Exp V1 Meye Znoeye	14	18	female	Finished stimuli\mo_hap_up_noeyes.jpg	mo	happy	yes	no	0	504	0	-5	z	m
Exp V1 Meye Znoeye	14	18	female	Finished stimuli\pf_hap_jumbledeye.jpg	pf	happy	no	yes	1	389	0	-5	m	m
Exp V1 Meye Znoeye	14	18	female	Finished stimuli\sw_hap_jumbled_noeyes.jpg	sw	happy	no	no	1	419	0	-5	z	z
Exp V1 Meye Znoeye	14	18	female	Finished stimuli\rhap_jumbled_noeyes.jpg	rh	happy	no	no	1	518	0	-5	z	z
Exp V1 Meye Znoeye	14	18	female	Finished stimuli\mf_fear_upeye.jpg	mf	fear	yes	yes	1	375	0	-5	m	m
Exp V1 Meye Znoeye	14	18	female	Finished stimuli\mo_fear_upeyes.jpg	mo	fear	yes	yes	1	329	0	-5	m	m
Exp V1 Meye Znoeye	14	18	female	Finished stimuli\pehappy_jumbled_eyes.jpg	pe	happy	no	yes	1	733	0	-5	m	m
Exp V1 Meye Znoeye	14	18	female	Finished stimuli\sw_hap_upeyes.jpg	sw	happy	yes	yes	1	459	0	-5	m	m
Exp V1 Meye Znoeye	14	18	female	Finished stimuli\mf_happy_jumbled_noeyes.jpg	mf	happy	no	no	1	344	0	-5	z	z
Exp V1 Meye Znoeye	14	18	female	Finished stimuli\sw_fear_jumbled_eyes.jpg	sw	fear	no	yes	1	370	0	-5	m	m
Exp V1 Meye Znoeye	14	18	female	Finished stimuli\mo_fear_upnoeyes.jpg	mo	fear	yes	no	0	510	0	-5	m	z
Exp V1 Meye Znoeye	14	18	female	Finished stimuli\wf_hap_jumbledeyes.jpg	wf	happy	no	yes	0	412	0	-4	z	m
Exp V1 Meye Znoeye	14	18	female	Finished stimuli\sw_fear_noeyes.jpg	sw	fear	yes	no	1	438	0	-5	z	z
Exp V1 Meye Znoeye	14	18	female	Finished stimuli\pefear_up_noeyes.jpg	pe	fear	yes	no	1	509	0	-5	z	z
Exp V1 Meye Znoeye	14	18	female	Finished stimuli\pefear_up_jumbled_noeyes.jpg	pe	fear	no	no	1	599	0	-4	z	z
Exp V1 Meye Znoeye	14	18	female	Finished stimuli\cc_happy_jumbledeyes.jpg	cc	happy	no	yes	1	416	0	-5	m	m
Exp V1 Meye Znoeye	14	18	female	Finished stimuli\pf_hap_up_noeye.jpg	pf	happy	yes	no	1	435	0	-5	z	z
Exp V1 Meye Znoeye	14	18	female	Finished stimuli\rhap_jumbled_noeyes.jpg	rh	happy	no	no	1	618	0	-5	z	z
Exp V1 Meye Znoeye	14	18	female	Finished stimuli\rfear_upeys.jpg	rf	fear	yes	yes	1	385	0	-5	m	m
Exp V1 Meye Znoeye	14	18	female	Finished stimuli\pehappy_noeyes.jpg	pe	happy	yes	no	1	419	0	66	z	z
Exp V1 Meye Znoeye	14	18	female	Finished stimuli\jjhap_jumbledeyes.jpg	jj	happy	no	yes	1	342	0	-5	m	m
Exp V1 Meye Znoeye	14	18	female	Finished stimuli\mf_happy_upeyes.jpg	mf	happy	yes	yes	1	436	0	-5	m	m
Exp V1 Meye Znoeye	14	18	female	Finished stimuli\sw_fear_jumbled_noeyes.jpg	sw	fear	no	no	1	487	0	-5	z	z
Exp V1 Meye Znoeye	14	18	female	Finished stimuli\sw_hap_jumbled_noeyes.jpg	sw	happy	no	no	1	728	0	-5	z	z
Exp V1 Meye Znoeye	14	18	female	Finished stimuli\JJhappyupeyes.jpg	JJ	happy	yes	yes	1	385	0	-5	m	m
Exp V1 Meye Znoeye	14	18	female	Finished stimuli\cc_happy_upnoeyes.jpg	cc	happy	yes	no	1	744	0	-4	z	z
Exp V1 Meye Znoeye	14	18	female	Finished stimuli\pf_hap_upeye.jpg	pf	happy	yes	yes	1	403	0	-5	m	m
Exp V1 Meye Znoeye	14	18	female	Finished stimuli\cc_fear_noeyes.jpg	cc	fear	yes	no	1	473	0	-5	z	z
Exp V1 Meye Znoeye	14	18	female	Finished stimuli\em_fear_jumbledeyes.jpg	em	fear	no	yes	1	358	0	-5	m	m
Exp V1 Meye Znoeye	14	18	female	Finished stimuli\pefear_upeyes.jpg	pe	fear	yes	yes	1	471	0	-5	m	m
Exp V1 Meye Znoeye	14	18	female	Finished stimuli\pf_hap_jumbledeye.jpg	pf	happy	no	yes	0	739	0	-5	m	z
Exp V1 Meye Znoeye	14	18	female	Finished stimuli\mo_fear_upeyes.jpg	mo	fear	yes	yes	1	332	0	-5	m	m
Exp V1 Meye Znoeye	14	18	female	Finished stimuli\rfear_up_noeys.jpg	rf	fear	yes	no	1	505	0	-5	z	z
Exp V1 Meye Znoeye	14	18	female	Finished stimuli\mf_fear_upeye.jpg	mf	fear	yes	yes	1	318	0	-5	m	m
Exp V1 Meye Znoeye	14	18	female	Finished stimuli\pehappy_upeyes.jpg	pe	happy	yes	yes	1	468	0	-5	m	m
Exp V1 Meye Znoeye	14	18	female	Finished stimuli\mf_fear_jumblednoeye.jpg	mf	fear	no	no	0	547	0	-5	z	m
Exp V1 Meye Znoeye	14	18	female	Finished stimuli\wf_hap_jumbled_noeyes.jpg	wf	happy	no	no	1	365	0	-5	z	z
Exp V1 Meye Znoeye	14	18	female	Finished stimuli\em_hap_jumbledeyes.jpg	em	happy	no	yes	1	507	0	-5	m	m
Exp V1 Meye Znoeye	14	18	female	Finished stimuli\mf_fear_jumbledeye.jpg	mf	fear	no	yes	1	404	0	-5	m	m
Exp V1 Meye Znoeye	14	18	female	Finished stimuli\rhap_noeyes.jpg	rh	happy	yes	no	1	423	0	-5	z	z
Exp V1 Meye Znoeye	14	18	female	Finished stimuli\em_fear_noeyes.jpg	em	fear	yes	no	1	538	0	-5	z	z
Exp V1 Meye Znoeye	14	18	female	Finished stimuli\wf_fea_up_noeyes.jpg	wf	fear	yes	no	1	376	0	-5	z	z
Exp V1 Meye Znoeye	14	18	female	Finished stimuli\mf_happy_jumbledeyes.jpg	mf	happy	no	yes	1	318	0	-5	m	m
Exp V1 Meye Znoeye	14	18	female	Finished stimuli\jjfear_jumblednoeyes.jpg	jj	fear	no	no	0	488	0	-4	z	m
Exp V1 Meye Znoeye	14	18	female	Finished stimuli\sw_fear_jumbled_eyes.jpg	sw	fear	no	yes	1	415	0	-4	m	m
Exp V1 Meye Znoeye	14	18	female	Finished stimuli\em_fear_upeyes.jpg	em	fear	yes	yes	1	488	0	-5	m	m
Exp V1 Meye Znoeye	14	18	female	Finished stimuli\pefear_up_jumbledeyes.jpg	pe	fear	no	yes	1	340	0	-5	m	m
Exp V1 Meye Znoeye	14	18	female	Finished stimuli\mo_hap_jumbledeyes.jpg	mo	happy	no	yes	1	363	0	-5	m	m
Exp V1 Meye Znoeye	14	18	female	Finished stimuli\mf_fear_up_noeye.jpg	mf	fear	yes	no	1	356	0	-5	z	z
Exp V1 Meye Znoeye	14	18	female	Finished stimuli\sw_fear_upeyes.jpg	sw	fear	yes	yes	1	309	0	-5	m	m
Exp V1 Meye Znoeye	14	18	female	Finished stimuli\cc_happy_upeyes.jpg	cc	happy	yes	yes	1	406	0	-5	m	m
Exp V1 Meye Znoeye	14	18	female	Finished stimuli\wf_fea_jumbled_noeyes.jpg	wf	fear	no	no	1	606	0	-4	z	z
Exp V1 Meye Znoeye	14	18	female	Finished stimuli\pf_fear_jumbledeyes.jpg	pf	fear	no	yes	1	383	0	-5	m	m
Exp V1 Meye Znoeye	14	18	female	Finished stimuli\cc_fearjumbledno_eye.jpg	cc	fear	no	no	1	480	0	-5	z	z
Exp V1 Meye Znoeye	14	18	female	Finished stimuli\rfear_jumbledeyess.jpg	rf	fear	no	yes	1	361	0	-5	m	m
Exp V1 Meye Znoeye	14	18	female	Finished stimuli\mo_hap_upeyes.jpg	mo	happy	yes	yes	1	435	0	-5	m	m
Exp V1 Meye Znoeye	14	18	female	Finished stimuli\JJhappyjumblednoeyes.jpg	JJ	happy	no	yes	0	409	0	-5	m	z
Exp V1 Meye Znoeye	14	18	female	Finished stimuli\pf_fear_jumbled_noeyes.jpg	pf	fear	no	no	1	579	0	-5	z	z
Exp V1 Meye Znoeye	14	18	female	Finished stimuli\em_hap_jumblednoeyes.jpg	em	happy	no	no	1	507	0	-4	z	z
Exp V1 Meye Znoeye	14	18	female	Finished stimuli\mo_hap_jumblednoeyes.jpg	mo	happy	no	no	1	383	0	-5	z	z
Exp V1 Meye Znoeye	14	18	female	Finished stimuli\cc_fear_up.jpg	cc	fear	yes	yes	1	372	0	-5	m	m
Exp V1 Meye Znoeye	14	18	female	Finished stimuli\mo_hap_up_noeyes.jpg	mo	happy	yes	no	1	622	0	-5	z	z
Exp V1 Meye Znoeye	14	18	female	Finished stimuli\jjfear_upnoeyes.jpg	jj	fear	yes	no	1	401	0	-5	z	z
Exp V1 Meye Znoeye	14	18	female	Finished stimuli\wf_hap_up_noeyes.jpg	wf	happy	yes	no	0	675	0	-5	m	z
Exp V1 Meye Znoeye	14	18	female	Finished stimuli\rfear_jumbled_noeyess.jpg	rf	fear	no	no	0	479	0	-5	z	m
Exp V1 Meye Znoeye	14	18	female	Finished stimuli\wf_hap_upeyes.jpg	wf	happy	yes	yes	1	528	0	-4	m	m
Exp V1 Meye Znoeye	14	18	female	Finished stimuli\rhap.jpg	rh	happy	yes	yes	1	352	0	-5	m	m
Exp V1 Meye Znoeye	14	18	female	Finished stimuli\mf_happy_jumbled_noeyes.jpg	mf	happy	no	no	1	351	0	-5	z	z
Exp V1 Meye Znoeye	14	18	female	Finished stimuli\JJhappyupnoeyes.jpg	JJ	happy	yes	no	1	566	0	66	z	z
Exp V1 Meye Znoeye	14	18	female	Finished stimuli\jjfear_upeyes.jpg	jj	fear	yes	yes	1	285	0	-4	m	m
Exp V1 Meye Znoeye	14	18	female	Finished stimuli\em_hap_noeyes.jpg	em	happy	yes	no	0	656	0	-5	z	m
Exp V1 Meye Znoeye	14	18	female	Finished stimuli\em_fear_jumblednoeyes.jpg	em	fear	no	no	1	416	0	-5	z	z
Exp V1 Meye Znoeye	14	18	female	Finished stimuli\pf_fear_up_noeyes.jpg	pf	fear	yes	no	1	598	0	-5	z	z
Exp V1 Meye Znoeye	14	18	female	Finished stimuli\rhap_jumbledeyes.jpg	rh	happy	no	yes	1	424	0	-5	m	m
Exp V1 Meye Znoeye	14	18	female	Finished stimuli\mo_fear_jumbledeyes.jpg	mo	fear	no	yes	1	484	0	-5	m	m
Exp V1 Meye Znoeye	14	18	female	Finished stimuli\wf_fea_jumbled_eyes.jpg	wf	fear	no	yes	1	626	0	136	m	m
Exp V1 Meye Znoeye	14	18	female	Finished stimuli\jjfear_jumbledeyes.jpg	jj	fear	no	yes	1	507	0	-4	m	m
Exp V1 Meye Znoeye	14	18	female	Finished stimuli\wf_hap_upeyes.jpg	wf	happy	yes	yes	0	759	0	-5	m	z
Exp V1 Meye Znoeye	14	18	female	Finished stimuli\sw_hap_upeyes.jpg	sw	happy	yes	yes	1	447	0	-5	m	m
Exp V1 Meye Znoeye	14	18	female	Finished stimuli\wf_fea_up eyes.jpg	wf	fear	yes	yes	1	415	0	-5	m	m
Exp V1 Meye Znoeye	14	18	female	Finished stimuli\cc_fear_jumbledeyes.jpg	cc	fear	no	yes	1	426	0	-5	m	m
Exp V1 Meye Znoeye	14	18	female	Finished stimuli\pf_fear_upeyes.jpg	pf	fear	yes	yes	1	657	0	-5	m	m
Exp V1 Meye Znoeye	14	18	female	Finished stimuli\mf_happy_upno_eyes.jpg	mf	happy	yes	no	1	486	0	-4	z	z
Exp V1 Meye Znoeye	14	18	female	Finished stimuli\pf_hap_jumbled_noeye.jpg	pf	happy	no	no	0	473	0	-5	z	m
Exp V1 Meye Znoeye	14	18	female	Finished stimuli\cc_happy_jumblednoeyes.jpg	cc	happy	no	no	1	386	0	-5	z	z
Exp V1 Meye Znoeye	14	18	female	Finished stimuli\em_hap_upeyes.jpg	em	happy	yes	yes	1	432	0	-5	m	m
Exp V1 Meye Znoeye	14	18	female	Finished stimuli\pehappy_jumbled_eyes.jpg	pe	happy	no	yes	1	453	0	113	m	m
Exp V1 Meye Znoeye	14	18	female	Finished stimuli\sw_hap_jumbledeyes.jpg	sw	happy	no	yes	1	651	0	-5	m	m
Exp V1 Meye Znoeye	14	18	female	Finished stimuli\mo_fear_jumblednoeyes.jpg	mo	fear	no	no	1	564	0	-4	z	z
Exp V1 Meye Znoeye	14	18	female	Finished stimuli\pehappy_jumbled_no_eyes.jpg	pe	happy	no	no	1	600	0	-5	z	z
Exp V1 Meye Znoeye	14	18	female	Finished stimuli\sw_hap_noeyes.jpg	sw	happy	yes	no	0	399	0	-5	z	m
Exp V1 Meye Znoeye	14	18	female	Finished stimuli\pefear_up_jumbled_noeyes.jpg	pe	fear	no	no	1	428	0	-5	z	z
Exp V1 Meye Znoeye	14	18	female	Finished stimuli\pf_fear_up_noeyes.jpg	pf	fear	yes	no	1	523	0	-5	z	z
Exp V1 Meye Znoeye	14	18	female	Finished stimuli\JJhappyupnoeyes.jpg	JJ	happy	yes	no	0	888	0	-5	z	m
Exp V1 Meye Znoeye	14	18	female	Finished stimuli\pefear_upeyes.jpg	pe	fear	yes	yes	1	407	0	-4	m	m
Exp V1 Meye Znoeye	14	18	female	Finished stimuli\mo_fear_upnoeyes.jpg	mo	fear	yes	no	1	472	0	-5	m	m
Exp V1 Meye Znoeye	14	18	female	Finished stimuli\cc_happy_jumbledeyes.jpg	cc	happy	no	yes	1	457	0	-5	m	m
Exp V1 Meye Znoeye	14	18	female	Finished stimuli\mo_fear_jumblednoeyes.jpg	mo	fear	no	no	1	457	0	-5	z	z
Exp V1 Meye Znoeye	14	18	female	Finished stimuli\mf_fear_upeye.jpg	mf	fear	yes	yes	1	369	0	-4	m	m
Exp V1 Meye Znoeye	14	18	female	Finished stimuli\pf_hap_up_noeye.jpg	pf	happy	yes	no	1	554	0	-5	z	z
Exp V1 Meye Znoeye	14	18	female	Finished stimuli\pf_hap_jumbledeye.jpg	pf	happy	no	yes	1	443	0	-5	m	m
Exp V1 Meye Znoeye	14	18	female	Finished stimuli\sw_hap_jumbled_noeyes.jpg	sw	happy	no	no	1	751	0	-5	z	z
Exp V1 Meye Znoeye	14	18	female	Finished stimuli\cc_fear_up.jpg	cc	fear	yes	yes	1	425	0	-5	m	m
Exp V1 Meye Znoeye	14	18	female	Finished stimuli\wf_fea_up eyes.jpg	wf	fear	yes	yes	1	473	0	-5	m	m
Exp V1 Meye Znoeye	14	18	female	Finished stimuli\em_fear_noeyes.jpg	em	fear	yes	no	1	533	0	-5	z	z
Exp V1 Meye Znoeye	14	18	female	Finished stimuli\mf_fear_jumblednoeye.jpg	mf	fear	no	no	0	711	0	-4	z	m
Exp V1 Meye Znoeye	14	18	female	Finished stimuli\wf_hap_upeyes.jpg	wf	happy	yes	yes	1	439	0	-5	m	m
Exp V1 Meye Znoeye	14	18	female	Finished stimuli\wf_fea_jumbled_noeyes.jpg	wf	fear	no	no	1	475	0	-5	z	z
Exp V1 Meye Znoeye	14	18	female	Finished stimuli\pehappy_jumbled_eyes.jpg	pe	happy	no	yes	1	626	0	-5	m	m
Exp V1 Meye Znoeye	14	18	female	Finished stimuli\pefear_up_noeyes.jpg	pe	fear	yes	no	1	613	0	-5	z	z
Exp V1 Meye Znoeye	14	18	female	Finished stimuli\wf_hap_up_noeyes.jpg	wf	happy	yes	no	1	792	0	-5	m	m
Exp V1 Meye Znoeye	14	18	female	Finished stimuli\mf_fear_up_noeye.jpg	mf	fear	yes	no	0	475	0	-5	z	m
Exp V1 Meye Znoeye	14	18	female	Finished stimuli\rfear_jumbledeyess.jpg	rf	fear	no	yes	1	438	0	-5	m	m
Exp V1 Meye Znoeye	14	18	female	Finished stimuli\rfear_up_noeys.jpg	rf	fear	yes	no	1	462	0	-5	z	z
Exp V1 Meye Znoeye	14	18	female	Finished stimuli\mf_happy_jumbled_noeyes.jpg	mf	happy	no	no	0	791	0	-4	z	m
Exp V1 Meye Znoeye	14	18	female	Finished stimuli\pehappy_noeyes.jpg	pe	happy	yes	no	1	480	0	-5	z	z
Exp V1 Meye Znoeye	14	18	female	Finished stimuli\cc_happy_upnoeyes.jpg	cc	happy	yes	no	1	672	0	-5	z	z
Exp V1 Meye Znoeye	14	18	female	Finished stimuli\cc_fearjumbledno_eye.jpg	cc	fear	no	no	1	683	0	113	z	z
Exp V1 Meye Znoeye	14	18	female	Finished stimuli\pf_fear_jumbledeyes.jpg	pf	fear	no	yes	1	299	0	-5	m	m
Exp V1 Meye Znoeye	14	18	female	Finished stimuli\jjhap_jumbledeyes.jpg	jj	happy	no	yes	1	391	0	-5	m	m
Exp V1 Meye Znoeye	14	18	female	Finished stimuli\mo_hap_jumbledeyes.jpg	mo	happy	no	yes	1	544	0	-5	m	m
Exp V1 Meye Znoeye	14	18	female	Finished stimuli\sw_fear_jumbled_noeyes.jpg	sw	fear	no	no	0	678	0	-5	z	m
Exp V1 Meye Znoeye	14	18	female	Finished stimuli\cc_fear_jumbledeyes.jpg	cc	fear	no	yes	1	399	0	-5	m	m
Exp V1 Meye Znoeye	14	18	female	Finished stimuli\em_hap_upeyes.jpg	em	happy	yes	yes	1	540	0	-5	m	m
Exp V1 Meye Znoeye	14	18	female	Finished stimuli\wf_hap_upeyes.jpg	wf	happy	yes	yes	1	529	0	-5	m	m
Exp V1 Meye Znoeye	14	18	female	Finished stimuli\wf_fea_up_noeyes.jpg	wf	fear	yes	no	1	550	0	-5	z	z
Exp V1 Meye Znoeye	14	18	female	Finished stimuli\JJhappyupeyes.jpg	JJ	happy	yes	yes	1	620	0	-5	m	m
Exp V1 Meye Znoeye	14	18	female	Finished stimuli\pf_fear_jumbled_noeyes.jpg	pf	fear	no	no	1	514	0	-5	z	z
Exp V1 Meye Znoeye	14	18	female	Finished stimuli\wf_hap_jumbled_noeyes.jpg	wf	happy	no	no	0	365	0	125	z	m
Exp V1 Meye Znoeye	14	18	female	Finished stimuli\mf_happy_jumbledeyes.jpg	mf	happy	no	yes	1	447	0	-5	m	m
Exp V1 Meye Znoeye	14	18	female	Finished stimuli\rfear_upeys.jpg	rf	fear	yes	yes	1	502	0	-5	m	m
Exp V1 Meye Znoeye	14	18	female	Finished stimuli\jjfear_jumbledeyes.jpg	jj	fear	no	yes	1	790	0	-4	m	m
Exp V1 Meye Znoeye	14	18	female	Finished stimuli\mf_happy_upno_eyes.jpg	mf	happy	yes	no	0	687	0	-5	z	m
Exp V1 Meye Znoeye	14	18	female	Finished stimuli\sw_hap_noeyes.jpg	sw	happy	yes	no	0	831	0	-5	z	m
Exp V1 Meye Znoeye	14	18	female	Finished stimuli\em_hap_jumblednoeyes.jpg	em	happy	no	no	1	915	0	-5	z	z
Exp V1 Meye Znoeye	14	18	female	Finished stimuli\mo_fear_jumbledeyes.jpg	mo	fear	no	yes	1	460	0	-5	m	m
Exp V1 Meye Znoeye	14	18	female	Finished stimuli\em_hap_jumbledeyes.jpg	em	happy	no	yes	1	577	0	-4	m	m
Exp V1 Meye Znoeye	14	18	female	Finished stimuli\mo_hap_jumblednoeyes.jpg	mo	happy	no	no	1	414	0	-5	z	z
Exp V1 Meye Znoeye	14	18	female	Finished stimuli\sw_hap_upeyes.jpg	sw	happy	yes	yes	1	489	0	-5	m	m
Exp V1 Meye Znoeye	14	18	female	Finished stimuli\pehappy_jumbled_no_eyes.jpg	pe	happy	no	no	1	765	0	-5	z	z
Exp V1 Meye Znoeye	14	18	female	Finished stimuli\pehappy_upeyes.jpg	pe	happy	yes	yes	1	583	0	-5	m	m
Exp V1 Meye Znoeye	14	18	female	Finished stimuli\em_hap_noeyes.jpg	em	happy	yes	no	0	841	0	-5	z	m
Exp V1 Meye Znoeye	14	18	female	Finished stimuli\jjfear_upeyes.jpg	jj	fear	yes	yes	1	465	0	-5	m	m
Exp V1 Meye Znoeye	14	18	female	Finished stimuli\rhap_jumbled_noeyes.jpg	rh	happy	no	no	1	555	0	-5	z	z
Exp V1 Meye Znoeye	14	18	female	Finished stimuli\mo_hap_upeyes.jpg	mo	happy	yes	yes	1	418	0	-4	m	m
Exp V1 Meye Znoeye	14	18	female	Finished stimuli\rfear_jumbled_noeyess.jpg	rf	fear	no	no	0	756	0	-5	z	m
Exp V1 Meye Znoeye	14	18	female	Finished stimuli\sw_fear_noeyes.jpg	sw	fear	yes	no	1	478	0	-5	z	z
Exp V1 Meye Znoeye	14	18	female	Finished stimuli\pf_hap_jumbled_noeye.jpg	pf	happy	no	no	1	554	0	-5	z	z
Exp V1 Meye Znoeye	14	18	female	Finished stimuli\pefear_up_jumbledeyes.jpg	pe	fear	no	yes	1	367	0	-5	m	m
Exp V1 Meye Znoeye	14	18	female	Finished stimuli\em_fear_upeyes.jpg	em	fear	yes	yes	1	469	0	-5	m	m
Exp V1 Meye Znoeye	14	18	female	Finished stimuli\cc_happy_upeyes.jpg	cc	happy	yes	yes	1	466	0	-5	m	m
Exp V1 Meye Znoeye	14	18	female	Finished stimuli\cc_fear_noeyes.jpg	cc	fear	yes	no	0	1476	0	-5	z	m
Exp V1 Meye Znoeye	14	18	female	Finished stimuli\rhap.jpg	rh	happy	yes	yes	1	368	0	-5	m	m
Exp V1 Meye Znoeye	14	18	female	Finished stimuli\JJhappyjumblednoeyes.jpg	JJ	happy	no	yes	0	530	0	-5	m	z
Exp V1 Meye Znoeye	14	18	female	Finished stimuli\sw_hap_jumbledeyes.jpg	sw	happy	no	yes	1	420	0	-5	m	m
Exp V1 Meye Znoeye	14	18	female	Finished stimuli\pf_fear_upeyes.jpg	pf	fear	yes	yes	1	407	0	-5	m	m
Exp V1 Meye Znoeye	14	18	female	Finished stimuli\rhap_jumbledeyes.jpg	rh	happy	no	yes	1	433	0	-5	m	m
Exp V1 Meye Znoeye	14	18	female	Finished stimuli\mo_fear_upeyes.jpg	mo	fear	yes	yes	1	1052	0	-5	m	m
Exp V1 Meye Znoeye	14	18	female	Finished stimuli\mf_fear_jumbledeye.jpg	mf	fear	no	yes	1	392	0	-5	m	m
Exp V1 Meye Znoeye	14	18	female	Finished stimuli\jjfear_upnoeyes.jpg	jj	fear	yes	no	1	446	0	-4	z	z
Exp V1 Meye Znoeye	14	18	female	Finished stimuli\sw_fear_upeyes.jpg	sw	fear	yes	yes	1	440	0	-5	m	m
Exp V1 Meye Znoeye	14	18	female	Finished stimuli\rhap_noeyes.jpg	rh	happy	yes	no	1	551	0	-5	z	z
Exp V1 Meye Znoeye	14	18	female	Finished stimuli\em_fear_jumblednoeyes.jpg	em	fear	no	no	1	533	0	-5	z	z
Exp V1 Meye Znoeye	14	18	female	Finished stimuli\jjfear_jumblednoeyes.jpg	jj	fear	no	no	1	619	0	-5	z	z
Exp V1 Meye Znoeye	14	18	female	Finished stimuli\mf_happy_upeyes.jpg	mf	happy	yes	yes	1	354	0	-5	m	m
Exp V1 Meye Znoeye	14	18	female	Finished stimuli\mo_hap_up_noeyes.jpg	mo	happy	yes	no	1	676	0	-4	z	z
Exp V1 Meye Znoeye	14	18	female	Finished stimuli\wf_hap_jumbledeyes.jpg	wf	happy	no	yes	0	431	0	-5	z	m
Exp V1 Meye Znoeye	14	18	female	Finished stimuli\em_fear_jumbledeyes.jpg	em	fear	no	yes	1	431	0	-5	m	m
Exp V1 Meye Znoeye	14	18	female	Finished stimuli\wf_fea_jumbled_eyes.jpg	wf	fear	no	yes	1	575	0	-5	m	m
Exp V1 Meye Znoeye	14	18	female	Finished stimuli\cc_happy_jumblednoeyes.jpg	cc	happy	no	no	1	421	0	-5	z	z
Exp V1 Meye Znoeye	14	18	female	Finished stimuli\sw_fear_jumbled_eyes.jpg	sw	fear	no	yes	1	261	0	-5	m	m
Exp V1 Meye Znoeye	14	18	female	Finished stimuli\pf_hap_upeye.jpg	pf	happy	yes	yes	1	424	0	-5	m	m
Exp V1 Meye Znoeye	14	18	female	Finished stimuli\cc_happy_jumbledeyes.jpg	cc	happy	no	yes	1	421	0	-5	m	m
Exp V1 Meye Znoeye	14	18	female	Finished stimuli\pf_hap_upeye.jpg	pf	happy	yes	yes	1	487	0	-5	m	m
Exp V1 Meye Znoeye	14	18	female	Finished stimuli\mo_hap_up_noeyes.jpg	mo	happy	yes	no	1	663	0	-5	z	z
Exp V1 Meye Znoeye	14	18	female	Finished stimuli\rhap_noeyes.jpg	rh	happy	yes	no	1	788	0	-5	z	z
Exp V1 Meye Znoeye	14	18	female	Finished stimuli\pf_hap_jumbledeye.jpg	pf	happy	no	yes	1	383	0	-4	m	m
Exp V1 Meye Znoeye	14	18	female	Finished stimuli\rfear_upeys.jpg	rf	fear	yes	yes	1	480	0	-5	m	m
Exp V1 Meye Znoeye	14	18	female	Finished stimuli\pf_hap_jumbled_noeye.jpg	pf	happy	no	no	1	476	0	-5	z	z
Exp V1 Meye Znoeye	14	18	female	Finished stimuli\mf_fear_up_noeye.jpg	mf	fear	yes	no	1	619	0	136	z	z
Exp V1 Meye Znoeye	14	18	female	Finished stimuli\JJhappyjumblednoeyes.jpg	JJ	happy	no	yes	0	557	0	-5	m	z
Exp V1 Meye Znoeye	14	18	female	Finished stimuli\JJhappyupeyes.jpg	JJ	happy	yes	yes	1	422	0	-5	m	m
Exp V1 Meye Znoeye	14	18	female	Finished stimuli\rfear_jumbledeyess.jpg	rf	fear	no	yes	1	489	0	-5	m	m
Exp V1 Meye Znoeye	14	18	female	Finished stimuli\pf_fear_upeyes.jpg	pf	fear	yes	yes	1	501	0	-5	m	m
Exp V1 Meye Znoeye	14	18	female	Finished stimuli\mf_fear_jumblednoeye.jpg	mf	fear	no	no	0	750	0	-5	z	m
Exp V1 Meye Znoeye	14	18	female	Finished stimuli\cc_happy_upnoeyes.jpg	cc	happy	yes	no	1	343	0	-5	z	z
Exp V1 Meye Znoeye	14	18	female	Finished stimuli\wf_fea_jumbled_eyes.jpg	wf	fear	no	yes	1	393	0	-5	m	m
Exp V1 Meye Znoeye	14	18	female	Finished stimuli\em_fear_noeyes.jpg	em	fear	yes	no	1	432	0	-4	z	z
Exp V1 Meye Znoeye	14	18	female	Finished stimuli\pf_fear_jumbledeyes.jpg	pf	fear	no	yes	1	386	0	-5	m	m
Exp V1 Meye Znoeye	14	18	female	Finished stimuli\jjfear_jumblednoeyes.jpg	jj	fear	no	no	1	399	0	-5	z	z
Exp V1 Meye Znoeye	14	18	female	Finished stimuli\jjfear_upeyes.jpg	jj	fear	yes	yes	1	354	0	-5	m	m
Exp V1 Meye Znoeye	14	18	female	Finished stimuli\wf_fea_up_noeyes.jpg	wf	fear	yes	no	1	444	0	-5	z	z
Exp V1 Meye Znoeye	14	18	female	Finished stimuli\mf_happy_jumbledeyes.jpg	mf	happy	no	yes	1	339	0	-5	m	m
Exp V1 Meye Znoeye	14	18	female	Finished stimuli\pehappy_noeyes.jpg	pe	happy	yes	no	0	549	0	-4	z	m
Exp V1 Meye Znoeye	14	18	female	Finished stimuli\mf_fear_upeye.jpg	mf	fear	yes	yes	1	430	0	-5	m	m
Exp V1 Meye Znoeye	14	18	female	Finished stimuli\mo_fear_upnoeyes.jpg	mo	fear	yes	no	0	357	0	-5	m	z
Exp V1 Meye Znoeye	14	18	female	Finished stimuli\mo_fear_jumblednoeyes.jpg	mo	fear	no	no	1	407	0	-5	z	z
Exp V1 Meye Znoeye	14	18	female	Finished stimuli\cc_fear_jumbledeyes.jpg	cc	fear	no	yes	1	360	0	-5	m	m
Exp V1 Meye Znoeye	14	18	female	Finished stimuli\pehappy_jumbled_eyes.jpg	pe	happy	no	yes	1	418	0	-5	m	m
Exp V1 Meye Znoeye	14	18	female	Finished stimuli\sw_fear_jumbled_noeyes.jpg	sw	fear	no	no	1	366	0	-5	z	z
Exp V1 Meye Znoeye	14	18	female	Finished stimuli\em_fear_jumblednoeyes.jpg	em	fear	no	no	1	483	0	-5	z	z
Exp V1 Meye Znoeye	14	18	female	Finished stimuli\pefear_up_jumbledeyes.jpg	pe	fear	no	yes	1	371	0	-5	m	m
Exp V1 Meye Znoeye	14	18	female	Finished stimuli\mo_hap_upeyes.jpg	mo	happy	yes	yes	1	413	0	-5	m	m
Exp V1 Meye Znoeye	14	18	female	Finished stimuli\pefear_up_noeyes.jpg	pe	fear	yes	no	1	392	0	-5	z	z
Exp V1 Meye Znoeye	14	18	female	Finished stimuli\mo_hap_jumbledeyes.jpg	mo	happy	no	yes	1	318	0	-5	m	m
Exp V1 Meye Znoeye	14	18	female	Finished stimuli\mo_fear_upeyes.jpg	mo	fear	yes	yes	1	364	0	-5	m	m
Exp V1 Meye Znoeye	14	18	female	Finished stimuli\pehappy_upeyes.jpg	pe	happy	yes	yes	1	416	0	-5	m	m
Exp V1 Meye Znoeye	14	18	female	Finished stimuli\wf_hap_upeyes.jpg	wf	happy	yes	yes	1	659	0	-5	m	m
Exp V1 Meye Znoeye	14	18	female	Finished stimuli\rhap_jumbled_noeyes.jpg	rh	happy	no	no	1	355	0	-5	z	z
Exp V1 Meye Znoeye	14	18	female	Finished stimuli\jjfear_upnoeyes.jpg	jj	fear	yes	no	1	412	0	-5	z	z
Exp V1 Meye Znoeye	14	18	female	Finished stimuli\cc_fearjumbledno_eye.jpg	cc	fear	no	no	1	532	0	-5	z	z
Exp V1 Meye Znoeye	14	18	female	Finished stimuli\cc_happy_jumblednoeyes.jpg	cc	happy	no	no	1	404	0	-5	z	z
Exp V1 Meye Znoeye	14	18	female	Finished stimuli\pefear_up_jumbled_noeyes.jpg	pe	fear	no	no	1	564	0	-5	z	z
Exp V1 Meye Znoeye	14	18	female	Finished stimuli\pefear_upeyes.jpg	pe	fear	yes	yes	1	292	0	-5	m	m
Exp V1 Meye Znoeye	14	18	female	Finished stimuli\rhap_jumbledeyes.jpg	rh	happy	no	yes	1	409	0	-5	m	m
Exp V1 Meye Znoeye	14	18	female	Finished stimuli\sw_hap_jumbled_noeyes.jpg	sw	happy	no	no	1	490	0	-5	z	z
Exp V1 Meye Znoeye	14	18	female	Finished stimuli\rhap.jpg	rh	happy	yes	yes	1	262	0	-5	m	m
Exp V1 Meye Znoeye	14	18	female	Finished stimuli\em_hap_noeyes.jpg	em	happy	yes	no	1	539	0	-5	z	z
Exp V1 Meye Znoeye	14	18	female	Finished stimuli\pf_fear_jumbled_noeyes.jpg	pf	fear	no	no	1	436	0	-5	z	z
Exp V1 Meye Znoeye	14	18	female	Finished stimuli\JJhappyupnoeyes.jpg	JJ	happy	yes	no	1	595	0	-5	z	z
Exp V1 Meye Znoeye	14	18	female	Finished stimuli\mf_fear_jumbledeye.jpg	mf	fear	no	yes	1	206	0	-5	m	m
Exp V1 Meye Znoeye	14	18	female	Finished stimuli\em_hap_jumblednoeyes.jpg	em	happy	no	no	1	484	0	-5	z	z
Exp V1 Meye Znoeye	14	18	female	Finished stimuli\sw_fear_upeyes.jpg	sw	fear	yes	yes	1	348	0	-5	m	m
Exp V1 Meye Znoeye	14	18	female	Finished stimuli\mf_happy_upno_eyes.jpg	mf	happy	yes	no	1	420	0	31	z	z
Exp V1 Meye Znoeye	14	18	female	Finished stimuli\rfear_jumbled_noeyess.jpg	rf	fear	no	no	1	681	0	-5	z	z
Exp V1 Meye Znoeye	14	18	female	Finished stimuli\cc_fear_up.jpg	cc	fear	yes	yes	1	293	0	-5	m	m
Exp V1 Meye Znoeye	14	18	female	Finished stimuli\pf_fear_up_noeyes.jpg	pf	fear	yes	no	1	817	0	-5	z	z
Exp V1 Meye Znoeye	14	18	female	Finished stimuli\cc_fear_noeyes.jpg	cc	fear	yes	no	1	452	0	-5	z	z
Exp V1 Meye Znoeye	14	18	female	Finished stimuli\pf_hap_up_noeye.jpg	pf	happy	yes	no	1	539	0	-5	z	z
Exp V1 Meye Znoeye	14	18	female	Finished stimuli\sw_hap_upeyes.jpg	sw	happy	yes	yes	1	468	0	-5	m	m
Exp V1 Meye Znoeye	14	18	female	Finished stimuli\sw_fear_jumbled_eyes.jpg	sw	fear	no	yes	1	396	0	-5	m	m
Exp V1 Meye Znoeye	14	18	female	Finished stimuli\mf_happy_upeyes.jpg	mf	happy	yes	yes	1	551	0	-5	m	m
Exp V1 Meye Znoeye	14	18	female	Finished stimuli\mf_happy_jumbled_noeyes.jpg	mf	happy	no	no	1	422	0	78	z	z
Exp V1 Meye Znoeye	14	18	female	Finished stimuli\cc_happy_upeyes.jpg	cc	happy	yes	yes	1	433	0	-5	m	m
Exp V1 Meye Znoeye	14	18	female	Finished stimuli\em_fear_upeyes.jpg	em	fear	yes	yes	1	440	0	-5	m	m
Exp V1 Meye Znoeye	14	18	female	Finished stimuli\mo_fear_jumbledeyes.jpg	mo	fear	no	yes	1	416	0	-5	m	m
Exp V1 Meye Znoeye	14	18	female	Finished stimuli\jjhap_jumbledeyes.jpg	jj	happy	no	yes	1	402	0	-5	m	m
Exp V1 Meye Znoeye	14	18	female	Finished stimuli\wf_hap_jumbled_noeyes.jpg	wf	happy	no	no	1	417	0	-5	z	z
Exp V1 Meye Znoeye	14	18	female	Finished stimuli\wf_hap_up_noeyes.jpg	wf	happy	yes	no	0	480	0	-5	m	z
Exp V1 Meye Znoeye	14	18	female	Finished stimuli\jjfear_jumbledeyes.jpg	jj	fear	no	yes	1	418	0	-5	m	m
Exp V1 Meye Znoeye	14	18	female	Finished stimuli\em_hap_upeyes.jpg	em	happy	yes	yes	1	618	0	159	m	m
Exp V1 Meye Znoeye	14	18	female	Finished stimuli\pehappy_jumbled_no_eyes.jpg	pe	happy	no	no	1	562	0	-5	z	z
Exp V1 Meye Znoeye	14	18	female	Finished stimuli\mo_hap_jumblednoeyes.jpg	mo	happy	no	no	1	412	0	-4	z	z
Exp V1 Meye Znoeye	14	18	female	Finished stimuli\rfear_up_noeys.jpg	rf	fear	yes	no	1	686	0	-5	z	z
Exp V1 Meye Znoeye	14	18	female	Finished stimuli\em_fear_jumbledeyes.jpg	em	fear	no	yes	1	538	0	-5	m	m
Exp V1 Meye Znoeye	14	18	female	Finished stimuli\sw_fear_noeyes.jpg	sw	fear	yes	no	1	463	0	-5	z	z
Exp V1 Meye Znoeye	14	18	female	Finished stimuli\sw_hap_jumbledeyes.jpg	sw	happy	no	yes	1	352	0	-5	m	m
Exp V1 Meye Znoeye	14	18	female	Finished stimuli\wf_fea_up eyes.jpg	wf	fear	yes	yes	1	401	0	-5	m	m
Exp V1 Meye Znoeye	14	18	female	Finished stimuli\em_hap_jumbledeyes.jpg	em	happy	no	yes	1	715	0	-5	m	m
Exp V1 Meye Znoeye	14	18	female	Finished stimuli\wf_hap_jumbledeyes.jpg	wf	happy	no	yes	0	583	0	-5	z	m
Exp V1 Meye Znoeye	14	18	female	Finished stimuli\sw_hap_noeyes.jpg	sw	happy	yes	no	0	709	0	-5	z	m
Exp V1 Meye Znoeye	14	18	female	Finished stimuli\wf_hap_upeyes.jpg	wf	happy	yes	yes	1	451	0	-4	m	m
Exp V1 Meye Znoeye	14	18	female	Finished stimuli\wf_fea_jumbled_noeyes.jpg	wf	fear	no	no	1	433	0	-5	z	z
Exp V1 Meye Znoeye	2	18	female	Finished stimuli\mf_fear_jumblednoeye.jpg	mf	fear	no	no	1	600	0	4	z	z
Exp V1 Meye Znoeye	2	18	female	Finished stimuli\sw_hap_jumbled_noeyes.jpg	sw	happy	no	no	1	602	0	4	z	z
Exp V1 Meye Znoeye	2	18	female	Finished stimuli\pf_hap_jumbled_noeye.jpg	pf	happy	no	no	0	624	0	4	z	m
Exp V1 Meye Znoeye	2	18	female	Finished stimuli\pefear_up_noeyes.jpg	pe	fear	yes	no	0	482	0	4	z	m
Exp V1 Meye Znoeye	2	18	female	Finished stimuli\cc_happy_jumblednoeyes.jpg	cc	happy	no	no	1	470	0	4	z	z
Exp V1 Meye Znoeye	2	18	female	Finished stimuli\em_fear_jumbledeyes.jpg	em	fear	no	yes	1	485	0	4	m	m
Exp V1 Meye Znoeye	2	18	female	Finished stimuli\mo_hap_jumbledeyes.jpg	mo	happy	no	yes	1	493	0	4	m	m
Exp V1 Meye Znoeye	2	18	female	Finished stimuli\pehappy_jumbled_eyes.jpg	pe	happy	no	yes	1	494	0	5	m	m
Exp V1 Meye Znoeye	2	18	female	Finished stimuli\mf_happy_upeyes.jpg	mf	happy	yes	yes	1	591	0	4	m	m
Exp V1 Meye Znoeye	2	18	female	Finished stimuli\jjfear_jumblednoeyes.jpg	jj	fear	no	no	1	476	0	4	z	z
Exp V1 Meye Znoeye	2	18	female	Finished stimuli\sw_fear_noeyes.jpg	sw	fear	yes	no	0	608	0	4	z	m
Exp V1 Meye Znoeye	2	18	female	Finished stimuli\cc_fear_noeyes.jpg	cc	fear	yes	no	1	495	0	4	z	z
Exp V1 Meye Znoeye	2	18	female	Finished stimuli\pf_fear_upeyes.jpg	pf	fear	yes	yes	1	536	0	4	m	m
Exp V1 Meye Znoeye	2	18	female	Finished stimuli\pefear_up_jumbled_noeyes.jpg	pe	fear	no	no	1	476	0	4	z	z
Exp V1 Meye Znoeye	2	18	female	Finished stimuli\wf_fea_up eyes.jpg	wf	fear	yes	yes	1	564	0	4	m	m
Exp V1 Meye Znoeye	2	18	female	Finished stimuli\rhap.jpg	rh	happy	yes	yes	1	666	0	4	m	m
Exp V1 Meye Znoeye	2	18	female	Finished stimuli\mo_fear_upnoeyes.jpg	mo	fear	yes	no	0	497	0	4	m	z
Exp V1 Meye Znoeye	2	18	female	Finished stimuli\em_hap_noeyes.jpg	em	happy	yes	no	0	621	0	4	z	m
Exp V1 Meye Znoeye	2	18	female	Finished stimuli\rfear_upeys.jpg	rf	fear	yes	yes	1	579	0	4	m	m
Exp V1 Meye Znoeye	2	18	female	Finished stimuli\wf_hap_up_noeyes.jpg	wf	happy	yes	no	1	517	0	4	m	m
Exp V1 Meye Znoeye	2	18	female	Finished stimuli\mf_fear_upeye.jpg	mf	fear	yes	yes	0	702	0	4	m	z
Exp V1 Meye Znoeye	2	18	female	Finished stimuli\em_fear_jumblednoeyes.jpg	em	fear	no	no	1	686	0	4	z	z
Exp V1 Meye Znoeye	2	18	female	Finished stimuli\rhap_jumbledeyes.jpg	rh	happy	no	yes	1	508	0	5	m	m
Exp V1 Meye Znoeye	2	18	female	Finished stimuli\rfear_jumbled_noeyess.jpg	rf	fear	no	no	1	836	0	4	z	z
Exp V1 Meye Znoeye	2	18	female	Finished stimuli\pf_hap_upeye.jpg	pf	happy	yes	yes	1	543	0	4	m	m
Exp V1 Meye Znoeye	2	18	female	Finished stimuli\pf_hap_up_noeye.jpg	pf	happy	yes	no	1	553	0	4	z	z
Exp V1 Meye Znoeye	2	18	female	Finished stimuli\pf_fear_jumbledeyes.jpg	pf	fear	no	yes	1	545	0	4	m	m
Exp V1 Meye Znoeye	2	18	female	Finished stimuli\cc_fearjumbledno_eye.jpg	cc	fear	no	no	1	624	0	5	z	z
Exp V1 Meye Znoeye	2	18	female	Finished stimuli\mf_fear_jumbledeye.jpg	mf	fear	no	yes	1	467	0	4	m	m
Exp V1 Meye Znoeye	2	18	female	Finished stimuli\wf_hap_jumbled_noeyes.jpg	wf	happy	no	no	1	539	0	4	z	z
Exp V1 Meye Znoeye	2	18	female	Finished stimuli\sw_fear_jumbled_eyes.jpg	sw	fear	no	yes	1	577	0	5	m	m
Exp V1 Meye Znoeye	2	18	female	Finished stimuli\JJhappyjumblednoeyes.jpg	JJ	happy	no	yes	0	611	0	4	m	z
Exp V1 Meye Znoeye	2	18	female	Finished stimuli\pehappy_upeyes.jpg	pe	happy	yes	yes	1	502	0	4	m	m
Exp V1 Meye Znoeye	2	18	female	Finished stimuli\wf_hap_upeyes.jpg	wf	happy	yes	yes	1	522	0	4	m	m
Exp V1 Meye Znoeye	2	18	female	Finished stimuli\mo_fear_jumblednoeyes.jpg	mo	fear	no	no	0	587	0	4	z	m
Exp V1 Meye Znoeye	2	18	female	Finished stimuli\cc_happy_jumbledeyes.jpg	cc	happy	no	yes	1	533	0	4	m	m
Exp V1 Meye Znoeye	2	18	female	Finished stimuli\pf_fear_jumbled_noeyes.jpg	pf	fear	no	no	1	594	0	4	z	z
Exp V1 Meye Znoeye	2	18	female	Finished stimuli\pehappy_noeyes.jpg	pe	happy	yes	no	1	604	0	4	z	z
Exp V1 Meye Znoeye	2	18	female	Finished stimuli\pf_fear_up_noeyes.jpg	pf	fear	yes	no	1	731	0	4	z	z
Exp V1 Meye Znoeye	2	18	female	Finished stimuli\cc_fear_jumbledeyes.jpg	cc	fear	no	yes	1	480	0	4	m	m
Exp V1 Meye Znoeye	2	18	female	Finished stimuli\mo_fear_jumbledeyes.jpg	mo	fear	no	yes	1	520	0	4	m	m
Exp V1 Meye Znoeye	2	18	female	Finished stimuli\jjfear_upeyes.jpg	jj	fear	yes	yes	1	501	0	4	m	m
Exp V1 Meye Znoeye	2	18	female	Finished stimuli\jjfear_upnoeyes.jpg	jj	fear	yes	no	1	570	0	4	z	z
Exp V1 Meye Znoeye	2	18	female	Finished stimuli\mf_fear_up_noeye.jpg	mf	fear	yes	no	1	656	0	4	z	z
Exp V1 Meye Znoeye	2	18	female	Finished stimuli\cc_fear_up.jpg	cc	fear	yes	yes	1	523	0	4	m	m
Exp V1 Meye Znoeye	2	18	female	Finished stimuli\mo_hap_up_noeyes.jpg	mo	happy	yes	no	0	644	0	4	z	m
Exp V1 Meye Znoeye	2	18	female	Finished stimuli\jjfear_jumbledeyes.jpg	jj	fear	no	yes	1	591	0	4	m	m
Exp V1 Meye Znoeye	2	18	female	Finished stimuli\mo_hap_upeyes.jpg	mo	happy	yes	yes	1	613	0	4	m	m
Exp V1 Meye Znoeye	2	18	female	Finished stimuli\em_hap_jumblednoeyes.jpg	em	happy	no	no	1	616	0	4	z	z
Exp V1 Meye Znoeye	2	18	female	Finished stimuli\wf_fea_jumbled_noeyes.jpg	wf	fear	no	no	1	604	0	4	z	z
Exp V1 Meye Znoeye	2	18	female	Finished stimuli\jjhap_jumbledeyes.jpg	jj	happy	no	yes	1	543	0	4	m	m
Exp V1 Meye Znoeye	2	18	female	Finished stimuli\mo_fear_upeyes.jpg	mo	fear	yes	yes	1	565	0	4	m	m
Exp V1 Meye Znoeye	2	18	female	Finished stimuli\sw_fear_jumbled_noeyes.jpg	sw	fear	no	no	1	590	0	4	z	z
Exp V1 Meye Znoeye	2	18	female	Finished stimuli\wf_fea_jumbled_eyes.jpg	wf	fear	no	yes	1	584	0	4	m	m
Exp V1 Meye Znoeye	2	18	female	Finished stimuli\JJhappyupnoeyes.jpg	JJ	happy	yes	no	0	718	0	4	z	m
Exp V1 Meye Znoeye	2	18	female	Finished stimuli\pefear_up_jumbledeyes.jpg	pe	fear	no	yes	1	699	0	4	m	m
Exp V1 Meye Znoeye	2	18	female	Finished stimuli\sw_fear_upeyes.jpg	sw	fear	yes	yes	1	592	0	4	m	m
Exp V1 Meye Znoeye	2	18	female	Finished stimuli\pehappy_jumbled_no_eyes.jpg	pe	happy	no	no	0	578	0	4	z	m
Exp V1 Meye Znoeye	2	18	female	Finished stimuli\em_fear_noeyes.jpg	em	fear	yes	no	1	592	0	4	z	z
Exp V1 Meye Znoeye	2	18	female	Finished stimuli\wf_hap_upeyes.jpg	wf	happy	yes	yes	1	575	0	4	m	m
Exp V1 Meye Znoeye	2	18	female	Finished stimuli\mf_happy_jumbledeyes.jpg	mf	happy	no	yes	1	581	0	4	m	m
Exp V1 Meye Znoeye	2	18	female	Finished stimuli\em_hap_jumbledeyes.jpg	em	happy	no	yes	1	730	0	4	m	m
Exp V1 Meye Znoeye	2	18	female	Finished stimuli\JJhappyupeyes.jpg	JJ	happy	yes	yes	1	556	0	4	m	m
Exp V1 Meye Znoeye	2	18	female	Finished stimuli\wf_hap_jumbledeyes.jpg	wf	happy	no	yes	0	582	0	4	z	m
Exp V1 Meye Znoeye	2	18	female	Finished stimuli\cc_happy_upeyes.jpg	cc	happy	yes	yes	1	612	0	4	m	m
Exp V1 Meye Znoeye	2	18	female	Finished stimuli\mf_happy_jumbled_noeyes.jpg	mf	happy	no	no	0	543	0	4	z	m
Exp V1 Meye Znoeye	2	18	female	Finished stimuli\pefear_upeyes.jpg	pe	fear	yes	yes	1	542	0	4	m	m
Exp V1 Meye Znoeye	2	18	female	Finished stimuli\mf_happy_upno_eyes.jpg	mf	happy	yes	no	1	518	0	4	z	z
Exp V1 Meye Znoeye	2	18	female	Finished stimuli\mo_hap_jumblednoeyes.jpg	mo	happy	no	no	0	483	0	4	z	m
Exp V1 Meye Znoeye	2	18	female	Finished stimuli\sw_hap_upeyes.jpg	sw	happy	yes	yes	1	535	0	4	m	m
Exp V1 Meye Znoeye	2	18	female	Finished stimuli\em_hap_upeyes.jpg	em	happy	yes	yes	1	583	0	4	m	m
Exp V1 Meye Znoeye	2	18	female	Finished stimuli\rfear_up_noeys.jpg	rf	fear	yes	no	0	498	0	4	z	m
Exp V1 Meye Znoeye	2	18	female	Finished stimuli\rhap_jumbled_noeyes.jpg	rh	happy	no	no	1	551	0	4	z	z
Exp V1 Meye Znoeye	2	18	female	Finished stimuli\em_fear_upeyes.jpg	em	fear	yes	yes	1	548	0	4	m	m
Exp V1 Meye Znoeye	2	18	female	Finished stimuli\rfear_jumbledeyess.jpg	rf	fear	no	yes	1	562	0	4	m	m
Exp V1 Meye Znoeye	2	18	female	Finished stimuli\rhap_noeyes.jpg	rh	happy	yes	no	0	632	0	4	z	m
Exp V1 Meye Znoeye	2	18	female	Finished stimuli\sw_hap_noeyes.jpg	sw	happy	yes	no	0	759	0	4	z	m
Exp V1 Meye Znoeye	2	18	female	Finished stimuli\sw_hap_jumbledeyes.jpg	sw	happy	no	yes	1	708	0	4	m	m
Exp V1 Meye Znoeye	2	18	female	Finished stimuli\cc_happy_upnoeyes.jpg	cc	happy	yes	no	1	525	0	4	z	z
Exp V1 Meye Znoeye	2	18	female	Finished stimuli\wf_fea_up_noeyes.jpg	wf	fear	yes	no	1	475	0	5	z	z
Exp V1 Meye Znoeye	2	18	female	Finished stimuli\pf_hap_jumbledeye.jpg	pf	happy	no	yes	1	574	0	4	m	m
Exp V1 Meye Znoeye	2	18	female	Finished stimuli\pehappy_upeyes.jpg	pe	happy	yes	yes	1	458	0	4	m	m
Exp V1 Meye Znoeye	2	18	female	Finished stimuli\pefear_up_noeyes.jpg	pe	fear	yes	no	1	514	0	4	z	z
Exp V1 Meye Znoeye	2	18	female	Finished stimuli\mo_hap_jumblednoeyes.jpg	mo	happy	no	no	0	698	0	4	z	m
Exp V1 Meye Znoeye	2	18	female	Finished stimuli\wf_fea_jumbled_eyes.jpg	wf	fear	no	yes	1	430	0	4	m	m
Exp V1 Meye Znoeye	2	18	female	Finished stimuli\JJhappyupeyes.jpg	JJ	happy	yes	yes	1	461	0	4	m	m
Exp V1 Meye Znoeye	2	18	female	Finished stimuli\mo_fear_upnoeyes.jpg	mo	fear	yes	no	0	509	0	4	m	z
Exp V1 Meye Znoeye	2	18	female	Finished stimuli\em_hap_noeyes.jpg	em	happy	yes	no	0	530	0	4	z	m
Exp V1 Meye Znoeye	2	18	female	Finished stimuli\pf_fear_upeyes.jpg	pf	fear	yes	yes	1	487	0	4	m	m
Exp V1 Meye Znoeye	2	18	female	Finished stimuli\JJhappyupnoeyes.jpg	JJ	happy	yes	no	0	467	0	4	z	m
Exp V1 Meye Znoeye	2	18	female	Finished stimuli\cc_happy_jumblednoeyes.jpg	cc	happy	no	no	1	464	0	4	z	z
Exp V1 Meye Znoeye	2	18	female	Finished stimuli\em_fear_noeyes.jpg	em	fear	yes	no	1	584	0	4	z	z
Exp V1 Meye Znoeye	2	18	female	Finished stimuli\cc_fear_jumbledeyes.jpg	cc	fear	no	yes	1	518	0	4	m	m
Exp V1 Meye Znoeye	2	18	female	Finished stimuli\sw_fear_noeyes.jpg	sw	fear	yes	no	1	674	0	4	z	z
Exp V1 Meye Znoeye	2	18	female	Finished stimuli\mf_happy_upno_eyes.jpg	mf	happy	yes	no	0	499	0	4	z	m
Exp V1 Meye Znoeye	2	18	female	Finished stimuli\em_hap_jumbledeyes.jpg	em	happy	no	yes	1	647	0	4	m	m
Exp V1 Meye Znoeye	2	18	female	Finished stimuli\em_hap_jumblednoeyes.jpg	em	happy	no	no	0	659	0	4	z	m
Exp V1 Meye Znoeye	2	18	female	Finished stimuli\rhap.jpg	rh	happy	yes	yes	1	611	0	4	m	m
Exp V1 Meye Znoeye	2	18	female	Finished stimuli\wf_hap_upeyes.jpg	wf	happy	yes	yes	1	674	0	4	m	m
Exp V1 Meye Znoeye	2	18	female	Finished stimuli\pefear_up_jumbled_noeyes.jpg	pe	fear	no	no	1	578	0	4	z	z
Exp V1 Meye Znoeye	2	18	female	Finished stimuli\sw_hap_noeyes.jpg	sw	happy	yes	no	0	541	0	4	z	m
Exp V1 Meye Znoeye	2	18	female	Finished stimuli\cc_fearjumbledno_eye.jpg	cc	fear	no	no	0	561	0	4	z	m
Exp V1 Meye Znoeye	2	18	female	Finished stimuli\pf_fear_jumbled_noeyes.jpg	pf	fear	no	no	1	723	0	4	z	z
Exp V1 Meye Znoeye	2	18	female	Finished stimuli\wf_fea_up eyes.jpg	wf	fear	yes	yes	1	408	0	4	m	m
Exp V1 Meye Znoeye	2	18	female	Finished stimuli\wf_hap_up_noeyes.jpg	wf	happy	yes	no	1	391	0	4	m	m
Exp V1 Meye Znoeye	2	18	female	Finished stimuli\mf_fear_up_noeye.jpg	mf	fear	yes	no	1	629	0	4	z	z
Exp V1 Meye Znoeye	2	18	female	Finished stimuli\wf_hap_jumbledeyes.jpg	wf	happy	no	yes	0	584	0	4	z	m
Exp V1 Meye Znoeye	2	18	female	Finished stimuli\mo_fear_jumblednoeyes.jpg	mo	fear	no	no	0	622	0	4	z	m
Exp V1 Meye Znoeye	2	18	female	Finished stimuli\cc_happy_upnoeyes.jpg	cc	happy	yes	no	1	597	0	4	z	z
Exp V1 Meye Znoeye	2	18	female	Finished stimuli\mo_hap_up_noeyes.jpg	mo	happy	yes	no	0	855	0	4	z	m
Exp V1 Meye Znoeye	2	18	female	Finished stimuli\pehappy_noeyes.jpg	pe	happy	yes	no	1	574	0	4	z	z
Exp V1 Meye Znoeye	2	18	female	Finished stimuli\mf_fear_jumbledeye.jpg	mf	fear	no	yes	1	560	0	4	m	m
Exp V1 Meye Znoeye	2	18	female	Finished stimuli\pehappy_jumbled_no_eyes.jpg	pe	happy	no	no	0	567	0	5	z	m
Exp V1 Meye Znoeye	2	18	female	Finished stimuli\sw_fear_upeyes.jpg	sw	fear	yes	yes	1	596	0	4	m	m
Exp V1 Meye Znoeye	2	18	female	Finished stimuli\mf_happy_jumbled_noeyes.jpg	mf	happy	no	no	1	667	0	4	z	z
Exp V1 Meye Znoeye	2	18	female	Finished stimuli\pf_fear_up_noeyes.jpg	pf	fear	yes	no	1	602	0	4	z	z
Exp V1 Meye Znoeye	2	18	female	Finished stimuli\pehappy_jumbled_eyes.jpg	pe	happy	no	yes	1	466	0	5	m	m
Exp V1 Meye Znoeye	2	18	female	Finished stimuli\sw_fear_jumbled_eyes.jpg	sw	fear	no	yes	1	569	0	4	m	m
Exp V1 Meye Znoeye	2	18	female	Finished stimuli\cc_fear_noeyes.jpg	cc	fear	yes	no	1	459	0	5	z	z
Exp V1 Meye Znoeye	2	18	female	Finished stimuli\rhap_jumbledeyes.jpg	rh	happy	no	yes	1	518	0	4	m	m
Exp V1 Meye Znoeye	2	18	female	Finished stimuli\mf_fear_upeye.jpg	mf	fear	yes	yes	1	472	0	4	m	m
Exp V1 Meye Znoeye	2	18	female	Finished stimuli\rfear_upeys.jpg	rf	fear	yes	yes	1	613	0	5	m	m
Exp V1 Meye Znoeye	2	18	female	Finished stimuli\cc_happy_jumbledeyes.jpg	cc	happy	no	yes	1	639	0	4	m	m
Exp V1 Meye Znoeye	2	18	female	Finished stimuli\rfear_up_noeys.jpg	rf	fear	yes	no	0	626	0	4	z	m
Exp V1 Meye Znoeye	2	18	female	Finished stimuli\mo_fear_upeyes.jpg	mo	fear	yes	yes	1	637	0	4	m	m
Exp V1 Meye Znoeye	2	18	female	Finished stimuli\pf_hap_upeye.jpg	pf	happy	yes	yes	1	500	0	4	m	m
Exp V1 Meye Znoeye	2	18	female	Finished stimuli\rfear_jumbledeyess.jpg	rf	fear	no	yes	1	521	0	4	m	m
Exp V1 Meye Znoeye	2	18	female	Finished stimuli\cc_fear_up.jpg	cc	fear	yes	yes	1	577	0	4	m	m
Exp V1 Meye Znoeye	2	18	female	Finished stimuli\sw_hap_jumbledeyes.jpg	sw	happy	no	yes	1	571	0	4	m	m
Exp V1 Meye Znoeye	2	18	female	Finished stimuli\JJhappyjumblednoeyes.jpg	JJ	happy	no	yes	1	533	0	4	m	m
Exp V1 Meye Znoeye	2	18	female	Finished stimuli\jjfear_upnoeyes.jpg	jj	fear	yes	no	0	754	0	4	z	m
Exp V1 Meye Znoeye	2	18	female	Finished stimuli\mo_hap_upeyes.jpg	mo	happy	yes	yes	1	648	0	4	m	m
Exp V1 Meye Znoeye	2	18	female	Finished stimuli\jjfear_jumbledeyes.jpg	jj	fear	no	yes	1	628	0	4	m	m
Exp V1 Meye Znoeye	2	18	female	Finished stimuli\sw_hap_upeyes.jpg	sw	happy	yes	yes	1	607	0	4	m	m
Exp V1 Meye Znoeye	2	18	female	Finished stimuli\mf_happy_jumbledeyes.jpg	mf	happy	no	yes	0	470	0	4	m	z
Exp V1 Meye Znoeye	2	18	female	Finished stimuli\jjfear_upeyes.jpg	jj	fear	yes	yes	1	478	0	4	m	m
Exp V1 Meye Znoeye	2	18	female	Finished stimuli\jjhap_jumbledeyes.jpg	jj	happy	no	yes	1	661	0	4	m	m
Exp V1 Meye Znoeye	2	18	female	Finished stimuli\jjfear_jumblednoeyes.jpg	jj	fear	no	no	1	616	0	4	z	z
Exp V1 Meye Znoeye	2	18	female	Finished stimuli\mf_fear_jumblednoeye.jpg	mf	fear	no	no	0	519	0	4	z	m
Exp V1 Meye Znoeye	2	18	female	Finished stimuli\sw_fear_jumbled_noeyes.jpg	sw	fear	no	no	0	565	0	4	z	m
Exp V1 Meye Znoeye	2	18	female	Finished stimuli\em_hap_upeyes.jpg	em	happy	yes	yes	1	567	0	4	m	m
Exp V1 Meye Znoeye	2	18	female	Finished stimuli\pefear_up_jumbledeyes.jpg	pe	fear	no	yes	1	585	0	4	m	m
Exp V1 Meye Znoeye	2	18	female	Finished stimuli\cc_happy_upeyes.jpg	cc	happy	yes	yes	1	627	0	4	m	m
Exp V1 Meye Znoeye	2	18	female	Finished stimuli\mf_happy_upeyes.jpg	mf	happy	yes	yes	1	675	0	4	m	m
Exp V1 Meye Znoeye	2	18	female	Finished stimuli\mo_hap_jumbledeyes.jpg	mo	happy	no	yes	1	634	0	4	m	m
Exp V1 Meye Znoeye	2	18	female	Finished stimuli\wf_hap_jumbled_noeyes.jpg	wf	happy	no	no	1	473	0	4	z	z
Exp V1 Meye Znoeye	2	18	female	Finished stimuli\wf_fea_up_noeyes.jpg	wf	fear	yes	no	0	490	0	5	z	m
Exp V1 Meye Znoeye	2	18	female	Finished stimuli\rhap_jumbled_noeyes.jpg	rh	happy	no	no	1	397	0	4	z	z
Exp V1 Meye Znoeye	2	18	female	Finished stimuli\em_fear_jumblednoeyes.jpg	em	fear	no	no	1	444	0	4	z	z
Exp V1 Meye Znoeye	2	18	female	Finished stimuli\rhap_noeyes.jpg	rh	happy	yes	no	0	420	0	5	z	m
Exp V1 Meye Znoeye	2	18	female	Finished stimuli\pf_hap_jumbledeye.jpg	pf	happy	no	yes	1	671	0	4	m	m
Exp V1 Meye Znoeye	2	18	female	Finished stimuli\wf_fea_jumbled_noeyes.jpg	wf	fear	no	no	0	1039	0	4	z	m
Exp V1 Meye Znoeye	2	18	female	Finished stimuli\pf_hap_jumbled_noeye.jpg	pf	happy	no	no	0	623	0	5	z	m
Exp V1 Meye Znoeye	2	18	female	Finished stimuli\pf_fear_jumbledeyes.jpg	pf	fear	no	yes	1	685	0	5	m	m
Exp V1 Meye Znoeye	2	18	female	Finished stimuli\mo_fear_jumbledeyes.jpg	mo	fear	no	yes	1	592	0	4	m	m
Exp V1 Meye Znoeye	2	18	female	Finished stimuli\rfear_jumbled_noeyess.jpg	rf	fear	no	no	1	434	0	4	z	z
Exp V1 Meye Znoeye	2	18	female	Finished stimuli\sw_hap_jumbled_noeyes.jpg	sw	happy	no	no	1	746	0	4	z	z
Exp V1 Meye Znoeye	2	18	female	Finished stimuli\em_fear_upeyes.jpg	em	fear	yes	yes	1	499	0	4	m	m
Exp V1 Meye Znoeye	2	18	female	Finished stimuli\pf_hap_up_noeye.jpg	pf	happy	yes	no	1	588	0	4	z	z
Exp V1 Meye Znoeye	2	18	female	Finished stimuli\pefear_upeyes.jpg	pe	fear	yes	yes	1	491	0	4	m	m
Exp V1 Meye Znoeye	2	18	female	Finished stimuli\em_fear_jumbledeyes.jpg	em	fear	no	yes	0	451	0	4	m	z
Exp V1 Meye Znoeye	2	18	female	Finished stimuli\wf_hap_upeyes.jpg	wf	happy	yes	yes	1	487	0	4	m	m
Exp V1 Meye Znoeye	2	18	female	Finished stimuli\mf_fear_upeye.jpg	mf	fear	yes	yes	1	470	0	4	m	m
Exp V1 Meye Znoeye	2	18	female	Finished stimuli\wf_fea_jumbled_eyes.jpg	wf	fear	no	yes	1	534	0	4	m	m
Exp V1 Meye Znoeye	2	18	female	Finished stimuli\mf_happy_upeyes.jpg	mf	happy	yes	yes	1	519	0	4	m	m
Exp V1 Meye Znoeye	2	18	female	Finished stimuli\rfear_jumbledeyess.jpg	rf	fear	no	yes	1	494	0	5	m	m
Exp V1 Meye Znoeye	2	18	female	Finished stimuli\JJhappyupnoeyes.jpg	JJ	happy	yes	no	0	561	0	4	z	m
Exp V1 Meye Znoeye	2	18	female	Finished stimuli\cc_fear_up.jpg	cc	fear	yes	yes	1	611	0	4	m	m
Exp V1 Meye Znoeye	2	18	female	Finished stimuli\rhap.jpg	rh	happy	yes	yes	1	609	0	4	m	m
Exp V1 Meye Znoeye	2	18	female	Finished stimuli\jjfear_jumblednoeyes.jpg	jj	fear	no	no	1	432	0	4	z	z
Exp V1 Meye Znoeye	2	18	female	Finished stimuli\wf_fea_up eyes.jpg	wf	fear	yes	yes	1	471	0	4	m	m
Exp V1 Meye Znoeye	2	18	female	Finished stimuli\JJhappyjumblednoeyes.jpg	JJ	happy	no	yes	0	607	0	4	m	z
Exp V1 Meye Znoeye	2	18	female	Finished stimuli\pefear_up_jumbled_noeyes.jpg	pe	fear	no	no	1	534	0	4	z	z
Exp V1 Meye Znoeye	2	18	female	Finished stimuli\sw_hap_noeyes.jpg	sw	happy	yes	no	1	639	0	4	z	z
Exp V1 Meye Znoeye	2	18	female	Finished stimuli\cc_fear_noeyes.jpg	cc	fear	yes	no	1	615	0	4	z	z
Exp V1 Meye Znoeye	2	18	female	Finished stimuli\mo_fear_jumbledeyes.jpg	mo	fear	no	yes	1	454	0	4	m	m
Exp V1 Meye Znoeye	2	18	female	Finished stimuli\mo_hap_jumblednoeyes.jpg	mo	happy	no	no	0	585	0	4	z	m
Exp V1 Meye Znoeye	2	18	female	Finished stimuli\pehappy_jumbled_eyes.jpg	pe	happy	no	yes	1	511	0	4	m	m
Exp V1 Meye Znoeye	2	18	female	Finished stimuli\pehappy_upeyes.jpg	pe	happy	yes	yes	1	548	0	4	m	m
Exp V1 Meye Znoeye	2	18	female	Finished stimuli\mo_fear_upnoeyes.jpg	mo	fear	yes	no	0	445	0	4	m	z
Exp V1 Meye Znoeye	2	18	female	Finished stimuli\rfear_up_noeys.jpg	rf	fear	yes	no	1	553	0	4	z	z
Exp V1 Meye Znoeye	2	18	female	Finished stimuli\rhap_jumbled_noeyes.jpg	rh	happy	no	no	1	590	0	4	z	z
Exp V1 Meye Znoeye	2	18	female	Finished stimuli\wf_hap_jumbled_noeyes.jpg	wf	happy	no	no	1	641	0	4	z	z
Exp V1 Meye Znoeye	2	18	female	Finished stimuli\pf_fear_up_noeyes.jpg	pf	fear	yes	no	1	508	0	4	z	z
Exp V1 Meye Znoeye	2	18	female	Finished stimuli\em_hap_noeyes.jpg	em	happy	yes	no	1	749	0	4	z	z
Exp V1 Meye Znoeye	2	18	female	Finished stimuli\mf_fear_jumbledeye.jpg	mf	fear	no	yes	1	486	0	4	m	m
Exp V1 Meye Znoeye	2	18	female	Finished stimuli\pf_fear_upeyes.jpg	pf	fear	yes	yes	1	571	0	4	m	m
Exp V1 Meye Znoeye	2	18	female	Finished stimuli\jjfear_upnoeyes.jpg	jj	fear	yes	no	1	517	0	4	z	z
Exp V1 Meye Znoeye	2	18	female	Finished stimuli\jjhap_jumbledeyes.jpg	jj	happy	no	yes	1	603	0	5	m	m
Exp V1 Meye Znoeye	2	18	female	Finished stimuli\em_fear_jumblednoeyes.jpg	em	fear	no	no	1	517	0	4	z	z
Exp V1 Meye Znoeye	2	18	female	Finished stimuli\mf_happy_jumbledeyes.jpg	mf	happy	no	yes	1	486	0	4	m	m
Exp V1 Meye Znoeye	2	18	female	Finished stimuli\em_fear_upeyes.jpg	em	fear	yes	yes	1	543	0	4	m	m
Exp V1 Meye Znoeye	2	18	female	Finished stimuli\wf_hap_upeyes.jpg	wf	happy	yes	yes	1	549	0	4	m	m
Exp V1 Meye Znoeye	2	18	female	Finished stimuli\cc_fear_jumbledeyes.jpg	cc	fear	no	yes	1	446	0	4	m	m
Exp V1 Meye Znoeye	2	18	female	Finished stimuli\em_hap_jumbledeyes.jpg	em	happy	no	yes	1	486	0	5	m	m
Exp V1 Meye Znoeye	2	18	female	Finished stimuli\wf_hap_upeyes.jpg	wf	happy	yes	yes	1	473	0	4	m	m
Exp V1 Meye Znoeye	2	18	female	Finished stimuli\pf_fear_jumbled_noeyes.jpg	pf	fear	no	no	1	369	0	4	z	z
Exp V1 Meye Znoeye	2	18	female	Finished stimuli\pefear_up_noeyes.jpg	pe	fear	yes	no	1	619	0	4	z	z
Exp V1 Meye Znoeye	2	18	female	Finished stimuli\sw_fear_jumbled_noeyes.jpg	sw	fear	no	no	1	578	0	4	z	z
Exp V1 Meye Znoeye	2	18	female	Finished stimuli\sw_hap_jumbledeyes.jpg	sw	happy	no	yes	1	401	0	4	m	m
Exp V1 Meye Znoeye	2	18	female	Finished stimuli\mf_happy_upno_eyes.jpg	mf	happy	yes	no	1	505	0	5	z	z
Exp V1 Meye Znoeye	2	18	female	Finished stimuli\cc_happy_upnoeyes.jpg	cc	happy	yes	no	1	608	0	4	z	z
Exp V1 Meye Znoeye	2	18	female	Finished stimuli\jjfear_upeyes.jpg	jj	fear	yes	yes	1	519	0	4	m	m
Exp V1 Meye Znoeye	2	18	female	Finished stimuli\pf_fear_jumbledeyes.jpg	pf	fear	no	yes	1	487	0	4	m	m
Exp V1 Meye Znoeye	2	18	female	Finished stimuli\em_fear_jumbledeyes.jpg	em	fear	no	yes	1	499	0	4	m	m
Exp V1 Meye Znoeye	2	18	female	Finished stimuli\pefear_up_jumbledeyes.jpg	pe	fear	no	yes	1	428	0	4	m	m
Exp V1 Meye Znoeye	2	18	female	Finished stimuli\pefear_upeyes.jpg	pe	fear	yes	yes	1	519	0	4	m	m
Exp V1 Meye Znoeye	2	18	female	Finished stimuli\rfear_jumbled_noeyess.jpg	rf	fear	no	no	1	384	0	4	z	z
Exp V1 Meye Znoeye	2	18	female	Finished stimuli\mo_hap_up_noeyes.jpg	mo	happy	yes	no	0	614	0	4	z	m
Exp V1 Meye Znoeye	2	18	female	Finished stimuli\em_fear_noeyes.jpg	em	fear	yes	no	0	533	0	4	z	m
Exp V1 Meye Znoeye	2	18	female	Finished stimuli\mo_hap_upeyes.jpg	mo	happy	yes	yes	1	499	0	4	m	m
Exp V1 Meye Znoeye	2	18	female	Finished stimuli\cc_happy_jumblednoeyes.jpg	cc	happy	no	no	1	491	0	4	z	z
Exp V1 Meye Znoeye	2	18	female	Finished stimuli\wf_fea_jumbled_noeyes.jpg	wf	fear	no	no	0	630	0	4	z	m
Exp V1 Meye Znoeye	2	18	female	Finished stimuli\wf_hap_jumbledeyes.jpg	wf	happy	no	yes	1	554	0	4	z	z
Exp V1 Meye Znoeye	2	18	female	Finished stimuli\sw_hap_jumbled_noeyes.jpg	sw	happy	no	no	0	688	0	4	z	m
Exp V1 Meye Znoeye	2	18	female	Finished stimuli\wf_hap_up_noeyes.jpg	wf	happy	yes	no	1	689	0	5	m	m
Exp V1 Meye Znoeye	2	18	female	Finished stimuli\cc_happy_jumbledeyes.jpg	cc	happy	no	yes	1	596	0	4	m	m
Exp V1 Meye Znoeye	2	18	female	Finished stimuli\rhap_noeyes.jpg	rh	happy	yes	no	0	547	0	4	z	m
Exp V1 Meye Znoeye	2	18	female	Finished stimuli\cc_fearjumbledno_eye.jpg	cc	fear	no	no	1	578	0	5	z	z
Exp V1 Meye Znoeye	2	18	female	Finished stimuli\em_hap_jumblednoeyes.jpg	em	happy	no	no	1	563	0	4	z	z
Exp V1 Meye Znoeye	2	18	female	Finished stimuli\mf_fear_up_noeye.jpg	mf	fear	yes	no	1	573	0	4	z	z
Exp V1 Meye Znoeye	2	18	female	Finished stimuli\mo_hap_jumbledeyes.jpg	mo	happy	no	yes	1	487	0	4	m	m
Exp V1 Meye Znoeye	2	18	female	Finished stimuli\sw_hap_upeyes.jpg	sw	happy	yes	yes	1	524	0	5	m	m
Exp V1 Meye Znoeye	2	18	female	Finished stimuli\pehappy_jumbled_no_eyes.jpg	pe	happy	no	no	1	488	0	4	z	z
Exp V1 Meye Znoeye	2	18	female	Finished stimuli\sw_fear_upeyes.jpg	sw	fear	yes	yes	1	457	0	4	m	m
Exp V1 Meye Znoeye	2	18	female	Finished stimuli\pf_hap_jumbledeye.jpg	pf	happy	no	yes	1	708	0	4	m	m
Exp V1 Meye Znoeye	2	18	female	Finished stimuli\pf_hap_jumbled_noeye.jpg	pf	happy	no	no	0	497	0	4	z	m
Exp V1 Meye Znoeye	2	18	female	Finished stimuli\mf_happy_jumbled_noeyes.jpg	mf	happy	no	no	0	446	0	4	z	m
Exp V1 Meye Znoeye	2	18	female	Finished stimuli\cc_happy_upeyes.jpg	cc	happy	yes	yes	1	618	0	4	m	m
Exp V1 Meye Znoeye	2	18	female	Finished stimuli\pehappy_noeyes.jpg	pe	happy	yes	no	1	482	0	4	z	z
Exp V1 Meye Znoeye	2	18	female	Finished stimuli\mo_fear_jumblednoeyes.jpg	mo	fear	no	no	1	512	0	4	z	z
Exp V1 Meye Znoeye	2	18	female	Finished stimuli\pf_hap_up_noeye.jpg	pf	happy	yes	no	1	658	0	5	z	z
Exp V1 Meye Znoeye	2	18	female	Finished stimuli\JJhappyupeyes.jpg	JJ	happy	yes	yes	1	385	0	4	m	m
Exp V1 Meye Znoeye	2	18	female	Finished stimuli\mo_fear_upeyes.jpg	mo	fear	yes	yes	1	620	0	4	m	m
Exp V1 Meye Znoeye	2	18	female	Finished stimuli\jjfear_jumbledeyes.jpg	jj	fear	no	yes	1	639	0	4	m	m
Exp V1 Meye Znoeye	2	18	female	Finished stimuli\em_hap_upeyes.jpg	em	happy	yes	yes	1	626	0	4	m	m
Exp V1 Meye Znoeye	2	18	female	Finished stimuli\sw_fear_jumbled_eyes.jpg	sw	fear	no	yes	1	582	0	4	m	m
Exp V1 Meye Znoeye	2	18	female	Finished stimuli\sw_fear_noeyes.jpg	sw	fear	yes	no	1	492	0	4	z	z
Exp V1 Meye Znoeye	2	18	female	Finished stimuli\rhap_jumbledeyes.jpg	rh	happy	no	yes	1	437	0	5	m	m
Exp V1 Meye Znoeye	2	18	female	Finished stimuli\rfear_upeys.jpg	rf	fear	yes	yes	1	407	0	4	m	m
Exp V1 Meye Znoeye	2	18	female	Finished stimuli\mf_fear_jumblednoeye.jpg	mf	fear	no	no	1	495	0	4	z	z
Exp V1 Meye Znoeye	2	18	female	Finished stimuli\wf_fea_up_noeyes.jpg	wf	fear	yes	no	1	551	0	4	z	z
Exp V1 Meye Znoeye	2	18	female	Finished stimuli\pf_hap_upeye.jpg	pf	happy	yes	yes	1	489	0	4	m	m
Exp V1 Meye Znoeye	2	18	female	Finished stimuli\cc_happy_upnoeyes.jpg	cc	happy	yes	no	1	626	0	4	z	z
Exp V1 Meye Znoeye	2	18	female	Finished stimuli\wf_hap_upeyes.jpg	wf	happy	yes	yes	1	289	0	4	m	m
Exp V1 Meye Znoeye	2	18	female	Finished stimuli\cc_fear_jumbledeyes.jpg	cc	fear	no	yes	1	483	0	5	m	m
Exp V1 Meye Znoeye	2	18	female	Finished stimuli\rhap_jumbled_noeyes.jpg	rh	happy	no	no	1	517	0	4	z	z
Exp V1 Meye Znoeye	2	18	female	Finished stimuli\rfear_up_noeys.jpg	rf	fear	yes	no	1	531	0	4	z	z
Exp V1 Meye Znoeye	2	18	female	Finished stimuli\pf_fear_jumbledeyes.jpg	pf	fear	no	yes	1	380	0	4	m	m
Exp V1 Meye Znoeye	2	18	female	Finished stimuli\mo_fear_upnoeyes.jpg	mo	fear	yes	no	0	430	0	4	m	z
Exp V1 Meye Znoeye	2	18	female	Finished stimuli\em_fear_jumblednoeyes.jpg	em	fear	no	no	1	501	0	4	z	z
Exp V1 Meye Znoeye	2	18	female	Finished stimuli\em_hap_noeyes.jpg	em	happy	yes	no	0	533	0	4	z	m
Exp V1 Meye Znoeye	2	18	female	Finished stimuli\pf_hap_up_noeye.jpg	pf	happy	yes	no	1	495	0	4	z	z
Exp V1 Meye Znoeye	2	18	female	Finished stimuli\cc_fear_noeyes.jpg	cc	fear	yes	no	1	551	0	4	z	z
Exp V1 Meye Znoeye	2	18	female	Finished stimuli\mf_happy_upeyes.jpg	mf	happy	yes	yes	1	457	0	4	m	m
Exp V1 Meye Znoeye	2	18	female	Finished stimuli\pf_fear_up_noeyes.jpg	pf	fear	yes	no	1	531	0	4	z	z
Exp V1 Meye Znoeye	2	18	female	Finished stimuli\pf_fear_upeyes.jpg	pf	fear	yes	yes	1	321	0	4	m	m
Exp V1 Meye Znoeye	2	18	female	Finished stimuli\rhap_jumbledeyes.jpg	rh	happy	no	yes	1	398	0	4	m	m
Exp V1 Meye Znoeye	2	18	female	Finished stimuli\pefear_up_jumbledeyes.jpg	pe	fear	no	yes	1	402	0	4	m	m
Exp V1 Meye Znoeye	2	18	female	Finished stimuli\rhap_noeyes.jpg	rh	happy	yes	no	0	448	0	4	z	m
Exp V1 Meye Znoeye	2	18	female	Finished stimuli\pefear_up_jumbled_noeyes.jpg	pe	fear	no	no	1	340	0	4	z	z
Exp V1 Meye Znoeye	2	18	female	Finished stimuli\mf_happy_jumbled_noeyes.jpg	mf	happy	no	no	1	573	0	4	z	z
Exp V1 Meye Znoeye	2	18	female	Finished stimuli\wf_fea_jumbled_noeyes.jpg	wf	fear	no	no	1	580	0	4	z	z
Exp V1 Meye Znoeye	2	18	female	Finished stimuli\wf_fea_up_noeyes.jpg	wf	fear	yes	no	1	658	0	4	z	z
Exp V1 Meye Znoeye	2	18	female	Finished stimuli\mo_fear_jumbledeyes.jpg	mo	fear	no	yes	1	429	0	4	m	m
Exp V1 Meye Znoeye	2	18	female	Finished stimuli\wf_hap_jumbled_noeyes.jpg	wf	happy	no	no	1	472	0	4	z	z
Exp V1 Meye Znoeye	2	18	female	Finished stimuli\jjfear_upnoeyes.jpg	jj	fear	yes	no	1	581	0	4	z	z
Exp V1 Meye Znoeye	2	18	female	Finished stimuli\wf_hap_jumbledeyes.jpg	wf	happy	no	yes	0	423	0	4	z	m
Exp V1 Meye Znoeye	2	18	female	Finished stimuli\mo_fear_upeyes.jpg	mo	fear	yes	yes	1	478	0	4	m	m
Exp V1 Meye Znoeye	2	18	female	Finished stimuli\jjhap_jumbledeyes.jpg	jj	happy	no	yes	0	654	0	4	m	z
Exp V1 Meye Znoeye	2	18	female	Finished stimuli\sw_hap_jumbled_noeyes.jpg	sw	happy	no	no	1	447	0	5	z	z
Exp V1 Meye Znoeye	2	18	female	Finished stimuli\pehappy_upeyes.jpg	pe	happy	yes	yes	1	621	0	4	m	m
Exp V1 Meye Znoeye	2	18	female	Finished stimuli\mf_fear_upeye.jpg	mf	fear	yes	yes	1	484	0	4	m	m
Exp V1 Meye Znoeye	2	18	female	Finished stimuli\jjfear_jumblednoeyes.jpg	jj	fear	no	no	1	695	0	4	z	z
Exp V1 Meye Znoeye	2	18	female	Finished stimuli\sw_hap_upeyes.jpg	sw	happy	yes	yes	1	588	0	4	m	m
Exp V1 Meye Znoeye	2	18	female	Finished stimuli\wf_hap_upeyes.jpg	wf	happy	yes	yes	1	595	0	4	m	m
Exp V1 Meye Znoeye	2	18	female	Finished stimuli\JJhappyupnoeyes.jpg	JJ	happy	yes	no	0	517	0	4	z	m
Exp V1 Meye Znoeye	2	18	female	Finished stimuli\jjfear_jumbledeyes.jpg	jj	fear	no	yes	1	490	0	4	m	m
Exp V1 Meye Znoeye	2	18	female	Finished stimuli\mo_hap_jumblednoeyes.jpg	mo	happy	no	no	1	556	0	4	z	z
Exp V1 Meye Znoeye	2	18	female	Finished stimuli\JJhappyjumblednoeyes.jpg	JJ	happy	no	yes	1	588	0	4	m	m
Exp V1 Meye Znoeye	2	18	female	Finished stimuli\rfear_upeys.jpg	rf	fear	yes	yes	1	491	0	4	m	m
Exp V1 Meye Znoeye	2	18	female	Finished stimuli\wf_fea_jumbled_eyes.jpg	wf	fear	no	yes	1	628	0	4	m	m
Exp V1 Meye Znoeye	2	18	female	Finished stimuli\sw_fear_noeyes.jpg	sw	fear	yes	no	1	578	0	4	z	z
Exp V1 Meye Znoeye	2	18	female	Finished stimuli\mo_hap_upeyes.jpg	mo	happy	yes	yes	1	464	0	4	m	m
Exp V1 Meye Znoeye	2	18	female	Finished stimuli\cc_fearjumbledno_eye.jpg	cc	fear	no	no	1	556	0	4	z	z
Exp V1 Meye Znoeye	2	18	female	Finished stimuli\cc_happy_jumblednoeyes.jpg	cc	happy	no	no	0	466	0	4	z	m
Exp V1 Meye Znoeye	2	18	female	Finished stimuli\JJhappyupeyes.jpg	JJ	happy	yes	yes	1	434	0	4	m	m
Exp V1 Meye Znoeye	2	18	female	Finished stimuli\mf_happy_jumbledeyes.jpg	mf	happy	no	yes	1	485	0	4	m	m
Exp V1 Meye Znoeye	2	18	female	Finished stimuli\pehappy_jumbled_no_eyes.jpg	pe	happy	no	no	0	721	0	4	z	m
Exp V1 Meye Znoeye	2	18	female	Finished stimuli\em_hap_upeyes.jpg	em	happy	yes	yes	1	682	0	3	m	m
Exp V1 Meye Znoeye	2	18	female	Finished stimuli\mo_hap_up_noeyes.jpg	mo	happy	yes	no	1	579	0	4	z	z
Exp V1 Meye Znoeye	2	18	female	Finished stimuli\jjfear_upeyes.jpg	jj	fear	yes	yes	1	476	0	4	m	m
Exp V1 Meye Znoeye	2	18	female	Finished stimuli\cc_fear_up.jpg	cc	fear	yes	yes	1	617	0	4	m	m
Exp V1 Meye Znoeye	2	18	female	Finished stimuli\cc_happy_jumbledeyes.jpg	cc	happy	no	yes	1	428	0	4	m	m
Exp V1 Meye Znoeye	2	18	female	Finished stimuli\em_hap_jumblednoeyes.jpg	em	happy	no	no	1	555	0	4	z	z
Exp V1 Meye Znoeye	2	18	female	Finished stimuli\pehappy_jumbled_eyes.jpg	pe	happy	no	yes	1	525	0	4	m	m
Exp V1 Meye Znoeye	2	18	female	Finished stimuli\pefear_upeyes.jpg	pe	fear	yes	yes	1	596	0	5	m	m
Exp V1 Meye Znoeye	2	18	female	Finished stimuli\mo_hap_jumbledeyes.jpg	mo	happy	no	yes	1	558	0	4	m	m
Exp V1 Meye Znoeye	2	18	female	Finished stimuli\cc_happy_upeyes.jpg	cc	happy	yes	yes	1	552	0	4	m	m
Exp V1 Meye Znoeye	2	18	female	Finished stimuli\mf_happy_upno_eyes.jpg	mf	happy	yes	no	0	570	0	4	z	m
Exp V1 Meye Znoeye	2	18	female	Finished stimuli\em_fear_noeyes.jpg	em	fear	yes	no	0	599	0	4	z	m
Exp V1 Meye Znoeye	2	18	female	Finished stimuli\wf_hap_up_noeyes.jpg	wf	happy	yes	no	0	606	0	4	m	z
Exp V1 Meye Znoeye	2	18	female	Finished stimuli\mf_fear_jumbledeye.jpg	mf	fear	no	yes	1	553	0	4	m	m
Exp V1 Meye Znoeye	2	18	female	Finished stimuli\pehappy_noeyes.jpg	pe	happy	yes	no	1	699	0	4	z	z
Exp V1 Meye Znoeye	2	18	female	Finished stimuli\pefear_up_noeyes.jpg	pe	fear	yes	no	1	516	0	4	z	z
Exp V1 Meye Znoeye	2	18	female	Finished stimuli\pf_fear_jumbled_noeyes.jpg	pf	fear	no	no	1	698	0	5	z	z
Exp V1 Meye Znoeye	2	18	female	Finished stimuli\rfear_jumbled_noeyess.jpg	rf	fear	no	no	1	590	0	4	z	z
Exp V1 Meye Znoeye	2	18	female	Finished stimuli\em_fear_upeyes.jpg	em	fear	yes	yes	1	541	0	4	m	m
Exp V1 Meye Znoeye	2	18	female	Finished stimuli\sw_hap_noeyes.jpg	sw	happy	yes	no	0	805	0	4	z	m
Exp V1 Meye Znoeye	2	18	female	Finished stimuli\rhap.jpg	rh	happy	yes	yes	1	616	0	4	m	m
Exp V1 Meye Znoeye	2	18	female	Finished stimuli\em_hap_jumbledeyes.jpg	em	happy	no	yes	1	708	0	5	m	m
Exp V1 Meye Znoeye	2	18	female	Finished stimuli\mf_fear_up_noeye.jpg	mf	fear	yes	no	1	446	0	5	z	z
Exp V1 Meye Znoeye	2	18	female	Finished stimuli\sw_fear_upeyes.jpg	sw	fear	yes	yes	1	492	0	4	m	m
Exp V1 Meye Znoeye	2	18	female	Finished stimuli\sw_fear_jumbled_noeyes.jpg	sw	fear	no	no	1	620	0	4	z	z
Exp V1 Meye Znoeye	2	18	female	Finished stimuli\em_fear_jumbledeyes.jpg	em	fear	no	yes	1	647	0	4	m	m
Exp V1 Meye Znoeye	2	18	female	Finished stimuli\rfear_jumbledeyess.jpg	rf	fear	no	yes	1	727	0	4	m	m
Exp V1 Meye Znoeye	2	18	female	Finished stimuli\sw_fear_jumbled_eyes.jpg	sw	fear	no	yes	1	708	0	4	m	m
Exp V1 Meye Znoeye	2	18	female	Finished stimuli\wf_fea_up eyes.jpg	wf	fear	yes	yes	1	755	0	4	m	m
Exp V1 Meye Znoeye	2	18	female	Finished stimuli\mo_fear_jumblednoeyes.jpg	mo	fear	no	no	1	578	0	4	z	z
Exp V1 Meye Znoeye	2	18	female	Finished stimuli\pf_hap_upeye.jpg	pf	happy	yes	yes	1	559	0	4	m	m
Exp V1 Meye Znoeye	2	18	female	Finished stimuli\mf_fear_jumblednoeye.jpg	mf	fear	no	no	1	617	0	4	z	z
Exp V1 Meye Znoeye	2	18	female	Finished stimuli\pf_hap_jumbledeye.jpg	pf	happy	no	yes	1	584	0	4	m	m
Exp V1 Meye Znoeye	2	18	female	Finished stimuli\sw_hap_jumbledeyes.jpg	sw	happy	no	yes	1	668	0	5	m	m
Exp V1 Meye Znoeye	2	18	female	Finished stimuli\pf_hap_jumbled_noeye.jpg	pf	happy	no	no	0	564	0	5	z	m
Exp V1 Meye Znoeye	3	20	female	Finished stimuli\wf_fea_up eyes.jpg	wf	fear	yes	yes	1	301	0	-1	m	m
Exp V1 Meye Znoeye	3	20	female	Finished stimuli\mf_happy_upno_eyes.jpg	mf	happy	yes	no	1	262	0	-1	z	z
Exp V1 Meye Znoeye	3	20	female	Finished stimuli\rhap.jpg	rh	happy	yes	yes	1	191	0	0	m	m
Exp V1 Meye Znoeye	3	20	female	Finished stimuli\cc_happy_upnoeyes.jpg	cc	happy	yes	no	1	190	0	-1	z	z
Exp V1 Meye Znoeye	3	20	female	Finished stimuli\mf_fear_up_noeye.jpg	mf	fear	yes	no	1	280	0	-1	z	z
Exp V1 Meye Znoeye	3	20	female	Finished stimuli\JJhappyjumblednoeyes.jpg	JJ	happy	no	yes	0	308	0	-1	m	z
Exp V1 Meye Znoeye	3	20	female	Finished stimuli\mo_hap_up_noeyes.jpg	mo	happy	yes	no	0	445	0	0	z	m
Exp V1 Meye Znoeye	3	20	female	Finished stimuli\wf_hap_up_noeyes.jpg	wf	happy	yes	no	1	236	0	-1	m	m
Exp V1 Meye Znoeye	3	20	female	Finished stimuli\mo_fear_jumblednoeyes.jpg	mo	fear	no	no	1	308	0	0	z	z
Exp V1 Meye Znoeye	3	20	female	Finished stimuli\mo_hap_upeyes.jpg	mo	happy	yes	yes	1	284	0	-1	m	m
Exp V1 Meye Znoeye	3	20	female	Finished stimuli\wf_fea_jumbled_eyes.jpg	wf	fear	no	yes	1	325	0	-1	m	m
Exp V1 Meye Znoeye	3	20	female	Finished stimuli\sw_hap_noeyes.jpg	sw	happy	yes	no	1	243	0	0	z	z
Exp V1 Meye Znoeye	3	20	female	Finished stimuli\pf_fear_jumbled_noeyes.jpg	pf	fear	no	no	1	331	0	0	z	z
Exp V1 Meye Znoeye	3	20	female	Finished stimuli\sw_hap_upeyes.jpg	sw	happy	yes	yes	1	254	0	-1	m	m
Exp V1 Meye Znoeye	3	20	female	Finished stimuli\sw_hap_jumbled_noeyes.jpg	sw	happy	no	no	1	378	0	-1	z	z
Exp V1 Meye Znoeye	3	20	female	Finished stimuli\cc_fearjumbledno_eye.jpg	cc	fear	no	no	0	254	0	0	z	m
Exp V1 Meye Znoeye	3	20	female	Finished stimuli\em_hap_noeyes.jpg	em	happy	yes	no	0	518	0	0	z	m
Exp V1 Meye Znoeye	3	20	female	Finished stimuli\pf_hap_upeye.jpg	pf	happy	yes	yes	1	288	0	0	m	m
Exp V1 Meye Znoeye	3	20	female	Finished stimuli\cc_fear_noeyes.jpg	cc	fear	yes	no	1	288	0	-1	z	z
Exp V1 Meye Znoeye	3	20	female	Finished stimuli\pefear_up_noeyes.jpg	pe	fear	yes	no	1	288	0	70	z	z
Exp V1 Meye Znoeye	3	20	female	Finished stimuli\em_fear_jumblednoeyes.jpg	em	fear	no	no	1	313	0	0	z	z
Exp V1 Meye Znoeye	3	20	female	Finished stimuli\wf_hap_jumbledeyes.jpg	wf	happy	no	yes	0	283	0	0	z	m
Exp V1 Meye Znoeye	3	20	female	Finished stimuli\pf_fear_up_noeyes.jpg	pf	fear	yes	no	1	544	0	-1	z	z
Exp V1 Meye Znoeye	3	20	female	Finished stimuli\sw_fear_noeyes.jpg	sw	fear	yes	no	1	286	0	-1	z	z
Exp V1 Meye Znoeye	3	20	female	Finished stimuli\mf_fear_jumblednoeye.jpg	mf	fear	no	no	0	281	0	0	z	m
Exp V1 Meye Znoeye	3	20	female	Finished stimuli\pehappy_jumbled_no_eyes.jpg	pe	happy	no	no	1	297	0	-1	z	z
Exp V1 Meye Znoeye	3	20	female	Finished stimuli\mf_fear_upeye.jpg	mf	fear	yes	yes	1	290	0	0	m	m
Exp V1 Meye Znoeye	3	20	female	Finished stimuli\JJhappyupeyes.jpg	JJ	happy	yes	yes	1	280	0	-1	m	m
Exp V1 Meye Znoeye	3	20	female	Finished stimuli\pehappy_noeyes.jpg	pe	happy	yes	no	0	361	0	-1	z	m
Exp V1 Meye Znoeye	3	20	female	Finished stimuli\mo_fear_jumbledeyes.jpg	mo	fear	no	yes	1	292	0	0	m	m
Exp V1 Meye Znoeye	3	20	female	Finished stimuli\mo_fear_upnoeyes.jpg	mo	fear	yes	no	0	309	0	-1	m	z
Exp V1 Meye Znoeye	3	20	female	Finished stimuli\mo_hap_jumblednoeyes.jpg	mo	happy	no	no	1	355	0	-1	z	z
Exp V1 Meye Znoeye	3	20	female	Finished stimuli\pefear_up_jumbled_noeyes.jpg	pe	fear	no	no	1	294	0	0	z	z
Exp V1 Meye Znoeye	3	20	female	Finished stimuli\JJhappyupnoeyes.jpg	JJ	happy	yes	no	0	240	0	0	z	m
Exp V1 Meye Znoeye	3	20	female	Finished stimuli\sw_fear_upeyes.jpg	sw	fear	yes	yes	1	273	0	0	m	m
Exp V1 Meye Znoeye	3	20	female	Finished stimuli\jjhap_jumbledeyes.jpg	jj	happy	no	yes	1	302	0	-1	m	m
Exp V1 Meye Znoeye	3	20	female	Finished stimuli\pf_fear_upeyes.jpg	pf	fear	yes	yes	1	264	0	0	m	m
Exp V1 Meye Znoeye	3	20	female	Finished stimuli\pefear_upeyes.jpg	pe	fear	yes	yes	1	220	0	-1	m	m
Exp V1 Meye Znoeye	3	20	female	Finished stimuli\rhap_jumbledeyes.jpg	rh	happy	no	yes	1	212	0	-1	m	m
Exp V1 Meye Znoeye	3	20	female	Finished stimuli\mf_happy_upeyes.jpg	mf	happy	yes	yes	1	251	0	-1	m	m
Exp V1 Meye Znoeye	3	20	female	Finished stimuli\em_fear_noeyes.jpg	em	fear	yes	no	1	300	0	-1	z	z
Exp V1 Meye Znoeye	3	20	female	Finished stimuli\sw_fear_jumbled_eyes.jpg	sw	fear	no	yes	1	274	0	-1	m	m
Exp V1 Meye Znoeye	3	20	female	Finished stimuli\wf_hap_upeyes.jpg	wf	happy	yes	yes	1	298	0	-1	m	m
Exp V1 Meye Znoeye	3	20	female	Finished stimuli\cc_happy_jumblednoeyes.jpg	cc	happy	no	no	1	388	0	-1	z	z
Exp V1 Meye Znoeye	3	20	female	Finished stimuli\cc_happy_jumbledeyes.jpg	cc	happy	no	yes	1	252	0	0	m	m
Exp V1 Meye Znoeye	3	20	female	Finished stimuli\jjfear_jumblednoeyes.jpg	jj	fear	no	no	1	325	0	0	z	z
Exp V1 Meye Znoeye	3	20	female	Finished stimuli\mf_happy_jumbled_noeyes.jpg	mf	happy	no	no	0	295	0	-1	z	m
Exp V1 Meye Znoeye	3	20	female	Finished stimuli\pf_fear_jumbledeyes.jpg	pf	fear	no	yes	1	285	0	-1	m	m
Exp V1 Meye Znoeye	3	20	female	Finished stimuli\wf_fea_jumbled_noeyes.jpg	wf	fear	no	no	1	434	0	-1	z	z
Exp V1 Meye Znoeye	3	20	female	Finished stimuli\mf_happy_jumbledeyes.jpg	mf	happy	no	yes	1	302	0	-1	m	m
Exp V1 Meye Znoeye	3	20	female	Finished stimuli\mo_fear_upeyes.jpg	mo	fear	yes	yes	1	245	0	0	m	m
Exp V1 Meye Znoeye	3	20	female	Finished stimuli\sw_fear_jumbled_noeyes.jpg	sw	fear	no	no	1	304	0	-1	z	z
Exp V1 Meye Znoeye	3	20	female	Finished stimuli\em_hap_upeyes.jpg	em	happy	yes	yes	1	295	0	0	m	m
Exp V1 Meye Znoeye	3	20	female	Finished stimuli\rfear_up_noeys.jpg	rf	fear	yes	no	0	304	0	-1	z	m
Exp V1 Meye Znoeye	3	20	female	Finished stimuli\pehappy_jumbled_eyes.jpg	pe	happy	no	yes	1	277	0	-1	m	m
Exp V1 Meye Znoeye	3	20	female	Finished stimuli\wf_hap_jumbled_noeyes.jpg	wf	happy	no	no	1	294	0	-1	z	z
Exp V1 Meye Znoeye	3	20	female	Finished stimuli\rfear_upeys.jpg	rf	fear	yes	yes	1	196	0	0	m	m
Exp V1 Meye Znoeye	3	20	female	Finished stimuli\wf_hap_upeyes.jpg	wf	happy	yes	yes	1	275	0	-1	m	m
Exp V1 Meye Znoeye	3	20	female	Finished stimuli\pf_hap_jumbledeye.jpg	pf	happy	no	yes	1	260	0	-1	m	m
Exp V1 Meye Znoeye	3	20	female	Finished stimuli\rfear_jumbledeyess.jpg	rf	fear	no	yes	1	276	0	0	m	m
Exp V1 Meye Znoeye	3	20	female	Finished stimuli\pf_hap_jumbled_noeye.jpg	pf	happy	no	no	0	210	0	-1	z	m
Exp V1 Meye Znoeye	3	20	female	Finished stimuli\em_fear_jumbledeyes.jpg	em	fear	no	yes	1	274	0	-1	m	m
Exp V1 Meye Znoeye	3	20	female	Finished stimuli\rhap_noeyes.jpg	rh	happy	yes	no	0	283	0	-1	z	m
Exp V1 Meye Znoeye	3	20	female	Finished stimuli\jjfear_jumbledeyes.jpg	jj	fear	no	yes	1	220	0	-1	m	m
Exp V1 Meye Znoeye	3	20	female	Finished stimuli\pehappy_upeyes.jpg	pe	happy	yes	yes	1	248	0	-1	m	m
Exp V1 Meye Znoeye	3	20	female	Finished stimuli\wf_fea_up_noeyes.jpg	wf	fear	yes	no	0	309	0	-1	z	m
Exp V1 Meye Znoeye	3	20	female	Finished stimuli\mf_fear_jumbledeye.jpg	mf	fear	no	yes	1	229	0	0	m	m
Exp V1 Meye Znoeye	3	20	female	Finished stimuli\mo_hap_jumbledeyes.jpg	mo	happy	no	yes	1	304	0	-1	m	m
Exp V1 Meye Znoeye	3	20	female	Finished stimuli\cc_happy_upeyes.jpg	cc	happy	yes	yes	1	326	0	-1	m	m
Exp V1 Meye Znoeye	3	20	female	Finished stimuli\em_fear_upeyes.jpg	em	fear	yes	yes	1	336	0	-1	m	m
Exp V1 Meye Znoeye	3	20	female	Finished stimuli\jjfear_upnoeyes.jpg	jj	fear	yes	no	1	321	0	0	z	z
Exp V1 Meye Znoeye	3	20	female	Finished stimuli\jjfear_upeyes.jpg	jj	fear	yes	yes	1	213	0	0	m	m
Exp V1 Meye Znoeye	3	20	female	Finished stimuli\rfear_jumbled_noeyess.jpg	rf	fear	no	no	1	272	0	-1	z	z
Exp V1 Meye Znoeye	3	20	female	Finished stimuli\em_hap_jumbledeyes.jpg	em	happy	no	yes	1	253	0	-1	m	m
Exp V1 Meye Znoeye	3	20	female	Finished stimuli\cc_fear_up.jpg	cc	fear	yes	yes	1	217	0	-1	m	m
Exp V1 Meye Znoeye	3	20	female	Finished stimuli\sw_hap_jumbledeyes.jpg	sw	happy	no	yes	1	197	0	-1	m	m
Exp V1 Meye Znoeye	3	20	female	Finished stimuli\em_hap_jumblednoeyes.jpg	em	happy	no	no	1	372	0	-1	z	z
Exp V1 Meye Znoeye	3	20	female	Finished stimuli\cc_fear_jumbledeyes.jpg	cc	fear	no	yes	1	315	0	-1	m	m
Exp V1 Meye Znoeye	3	20	female	Finished stimuli\rhap_jumbled_noeyes.jpg	rh	happy	no	no	1	274	0	0	z	z
Exp V1 Meye Znoeye	3	20	female	Finished stimuli\pefear_up_jumbledeyes.jpg	pe	fear	no	yes	1	215	0	-1	m	m
Exp V1 Meye Znoeye	3	20	female	Finished stimuli\pf_hap_up_noeye.jpg	pf	happy	yes	no	1	255	0	0	z	z
Exp V1 Meye Znoeye	3	20	female	Finished stimuli\rhap.jpg	rh	happy	yes	yes	1	168	0	0	m	m
Exp V1 Meye Znoeye	3	20	female	Finished stimuli\mo_hap_upeyes.jpg	mo	happy	yes	yes	1	155	0	-1	m	m
Exp V1 Meye Znoeye	3	20	female	Finished stimuli\pehappy_jumbled_eyes.jpg	pe	happy	no	yes	1	241	0	-1	m	m
Exp V1 Meye Znoeye	3	20	female	Finished stimuli\cc_fear_jumbledeyes.jpg	cc	fear	no	yes	1	222	0	-1	m	m
Exp V1 Meye Znoeye	3	20	female	Finished stimuli\mf_fear_upeye.jpg	mf	fear	yes	yes	1	246	0	-1	m	m
Exp V1 Meye Znoeye	3	20	female	Finished stimuli\mo_fear_upnoeyes.jpg	mo	fear	yes	no	1	231	0	0	m	m
Exp V1 Meye Znoeye	3	20	female	Finished stimuli\em_hap_noeyes.jpg	em	happy	yes	no	1	274	0	0	z	z
Exp V1 Meye Znoeye	3	20	female	Finished stimuli\jjfear_jumbledeyes.jpg	jj	fear	no	yes	1	199	0	0	m	m
Exp V1 Meye Znoeye	3	20	female	Finished stimuli\pf_fear_upeyes.jpg	pf	fear	yes	yes	1	266	0	0	m	m
Exp V1 Meye Znoeye	3	20	female	Finished stimuli\em_hap_jumbledeyes.jpg	em	happy	no	yes	1	319	0	-1	m	m
Exp V1 Meye Znoeye	3	20	female	Finished stimuli\mf_fear_jumbledeye.jpg	mf	fear	no	yes	1	228	0	-1	m	m
Exp V1 Meye Znoeye	3	20	female	Finished stimuli\sw_fear_jumbled_eyes.jpg	sw	fear	no	yes	1	284	0	-1	m	m
Exp V1 Meye Znoeye	3	20	female	Finished stimuli\cc_happy_upeyes.jpg	cc	happy	yes	yes	1	274	0	-1	m	m
Exp V1 Meye Znoeye	3	20	female	Finished stimuli\pf_fear_jumbled_noeyes.jpg	pf	fear	no	no	1	307	0	0	z	z
Exp V1 Meye Znoeye	3	20	female	Finished stimuli\pefear_upeyes.jpg	pe	fear	yes	yes	1	280	0	-1	m	m
Exp V1 Meye Znoeye	3	20	female	Finished stimuli\em_hap_upeyes.jpg	em	happy	yes	yes	1	297	0	-1	m	m
Exp V1 Meye Znoeye	3	20	female	Finished stimuli\rfear_jumbled_noeyess.jpg	rf	fear	no	no	1	242	0	-1	z	z
Exp V1 Meye Znoeye	3	20	female	Finished stimuli\wf_fea_up_noeyes.jpg	wf	fear	yes	no	1	299	0	0	z	z
Exp V1 Meye Znoeye	3	20	female	Finished stimuli\sw_hap_jumbled_noeyes.jpg	sw	happy	no	no	1	443	0	-1	z	z
Exp V1 Meye Znoeye	3	20	female	Finished stimuli\mf_happy_upno_eyes.jpg	mf	happy	yes	no	1	327	0	-1	z	z
Exp V1 Meye Znoeye	3	20	female	Finished stimuli\mo_fear_upeyes.jpg	mo	fear	yes	yes	1	238	0	0	m	m
Exp V1 Meye Znoeye	3	20	female	Finished stimuli\wf_hap_up_noeyes.jpg	wf	happy	yes	no	1	318	0	-1	m	m
Exp V1 Meye Znoeye	3	20	female	Finished stimuli\pefear_up_noeyes.jpg	pe	fear	yes	no	1	472	0	-1	z	z
Exp V1 Meye Znoeye	3	20	female	Finished stimuli\pefear_up_jumbledeyes.jpg	pe	fear	no	yes	1	213	0	-1	m	m
Exp V1 Meye Znoeye	3	20	female	Finished stimuli\pf_hap_up_noeye.jpg	pf	happy	yes	no	1	242	0	0	z	z
Exp V1 Meye Znoeye	3	20	female	Finished stimuli\mo_hap_up_noeyes.jpg	mo	happy	yes	no	0	698	0	-1	z	m
Exp V1 Meye Znoeye	3	20	female	Finished stimuli\jjhap_jumbledeyes.jpg	jj	happy	no	yes	1	337	0	0	m	m
Exp V1 Meye Znoeye	3	20	female	Finished stimuli\mf_fear_up_noeye.jpg	mf	fear	yes	no	0	346	0	0	z	m
Exp V1 Meye Znoeye	3	20	female	Finished stimuli\jjfear_jumblednoeyes.jpg	jj	fear	no	no	1	320	0	-1	z	z
Exp V1 Meye Znoeye	3	20	female	Finished stimuli\pehappy_jumbled_no_eyes.jpg	pe	happy	no	no	1	333	0	-1	z	z
Exp V1 Meye Znoeye	3	20	female	Finished stimuli\sw_fear_noeyes.jpg	sw	fear	yes	no	1	323	0	-1	z	z
Exp V1 Meye Znoeye	3	20	female	Finished stimuli\pehappy_noeyes.jpg	pe	happy	yes	no	1	386	0	0	z	z
Exp V1 Meye Znoeye	3	20	female	Finished stimuli\em_hap_jumblednoeyes.jpg	em	happy	no	no	1	340	0	-1	z	z
Exp V1 Meye Znoeye	3	20	female	Finished stimuli\pf_hap_jumbled_noeye.jpg	pf	happy	no	no	0	295	0	0	z	m
Exp V1 Meye Znoeye	3	20	female	Finished stimuli\em_fear_jumblednoeyes.jpg	em	fear	no	no	1	216	0	-1	z	z
Exp V1 Meye Znoeye	3	20	female	Finished stimuli\em_fear_upeyes.jpg	em	fear	yes	yes	1	289	0	-1	m	m
Exp V1 Meye Znoeye	3	20	female	Finished stimuli\wf_fea_jumbled_eyes.jpg	wf	fear	no	yes	1	279	0	0	m	m
Exp V1 Meye Znoeye	3	20	female	Finished stimuli\mo_fear_jumblednoeyes.jpg	mo	fear	no	no	1	292	0	0	z	z
Exp V1 Meye Znoeye	3	20	female	Finished stimuli\jjfear_upeyes.jpg	jj	fear	yes	yes	1	288	0	-1	m	m
Exp V1 Meye Znoeye	3	20	female	Finished stimuli\mo_fear_jumbledeyes.jpg	mo	fear	no	yes	1	286	0	0	m	m
Exp V1 Meye Znoeye	3	20	female	Finished stimuli\wf_hap_jumbled_noeyes.jpg	wf	happy	no	no	1	200	0	0	z	z
Exp V1 Meye Znoeye	3	20	female	Finished stimuli\pf_fear_jumbledeyes.jpg	pf	fear	no	yes	1	263	0	-1	m	m
Exp V1 Meye Znoeye	3	20	female	Finished stimuli\wf_hap_jumbledeyes.jpg	wf	happy	no	yes	0	472	0	-1	z	m
Exp V1 Meye Znoeye	3	20	female	Finished stimuli\em_fear_noeyes.jpg	em	fear	yes	no	1	198	0	-1	z	z
Exp V1 Meye Znoeye	3	20	female	Finished stimuli\mf_fear_jumblednoeye.jpg	mf	fear	no	no	0	274	0	-1	z	m
Exp V1 Meye Znoeye	3	20	female	Finished stimuli\mf_happy_jumbledeyes.jpg	mf	happy	no	yes	1	203	0	-1	m	m
Exp V1 Meye Znoeye	3	20	female	Finished stimuli\pf_hap_upeye.jpg	pf	happy	yes	yes	1	275	0	-1	m	m
Exp V1 Meye Znoeye	3	20	female	Finished stimuli\cc_fear_noeyes.jpg	cc	fear	yes	no	1	295	0	-1	z	z
Exp V1 Meye Znoeye	3	20	female	Finished stimuli\wf_fea_jumbled_noeyes.jpg	wf	fear	no	no	1	313	0	-1	z	z
Exp V1 Meye Znoeye	3	20	female	Finished stimuli\cc_happy_jumblednoeyes.jpg	cc	happy	no	no	0	587	0	0	z	m
Exp V1 Meye Znoeye	3	20	female	Finished stimuli\rhap_noeyes.jpg	rh	happy	yes	no	0	500	0	211	z	m
Exp V1 Meye Znoeye	3	20	female	Finished stimuli\jjfear_upnoeyes.jpg	jj	fear	yes	no	0	497	0	-1	z	m
Exp V1 Meye Znoeye	3	20	female	Finished stimuli\rfear_jumbledeyess.jpg	rf	fear	no	yes	1	266	0	-1	m	m
Exp V1 Meye Znoeye	3	20	female	Finished stimuli\mf_happy_upeyes.jpg	mf	happy	yes	yes	1	315	0	-1	m	m
Exp V1 Meye Znoeye	3	20	female	Finished stimuli\pf_fear_up_noeyes.jpg	pf	fear	yes	no	1	301	0	-1	z	z
Exp V1 Meye Znoeye	3	20	female	Finished stimuli\sw_hap_upeyes.jpg	sw	happy	yes	yes	1	311	0	0	m	m
Exp V1 Meye Znoeye	3	20	female	Finished stimuli\mo_hap_jumblednoeyes.jpg	mo	happy	no	no	1	272	0	-1	z	z
Exp V1 Meye Znoeye	3	20	female	Finished stimuli\pf_hap_jumbledeye.jpg	pf	happy	no	yes	1	278	0	0	m	m
Exp V1 Meye Znoeye	3	20	female	Finished stimuli\sw_hap_jumbledeyes.jpg	sw	happy	no	yes	1	323	0	-1	m	m
Exp V1 Meye Znoeye	3	20	female	Finished stimuli\em_fear_jumbledeyes.jpg	em	fear	no	yes	1	290	0	0	m	m
Exp V1 Meye Znoeye	3	20	female	Finished stimuli\sw_fear_upeyes.jpg	sw	fear	yes	yes	1	283	0	-1	m	m
Exp V1 Meye Znoeye	3	20	female	Finished stimuli\pefear_up_jumbled_noeyes.jpg	pe	fear	no	no	1	249	0	-1	z	z
Exp V1 Meye Znoeye	3	20	female	Finished stimuli\cc_fearjumbledno_eye.jpg	cc	fear	no	no	1	487	0	281	z	z
Exp V1 Meye Znoeye	3	20	female	Finished stimuli\cc_happy_jumbledeyes.jpg	cc	happy	no	yes	1	1218	0	0	m	m
Exp V1 Meye Znoeye	3	20	female	Finished stimuli\JJhappyupeyes.jpg	JJ	happy	yes	yes	1	337	0	-1	m	m
Exp V1 Meye Znoeye	3	20	female	Finished stimuli\mf_happy_jumbled_noeyes.jpg	mf	happy	no	no	1	260	0	-1	z	z
Exp V1 Meye Znoeye	3	20	female	Finished stimuli\mo_hap_jumbledeyes.jpg	mo	happy	no	yes	1	302	0	23	m	m
Exp V1 Meye Znoeye	3	20	female	Finished stimuli\wf_fea_up eyes.jpg	wf	fear	yes	yes	1	199	0	-1	m	m
Exp V1 Meye Znoeye	3	20	female	Finished stimuli\JJhappyjumblednoeyes.jpg	JJ	happy	no	yes	0	247	0	0	m	z
Exp V1 Meye Znoeye	3	20	female	Finished stimuli\sw_fear_jumbled_noeyes.jpg	sw	fear	no	no	0	689	0	-1	z	m
Exp V1 Meye Znoeye	3	20	female	Finished stimuli\wf_hap_upeyes.jpg	wf	happy	yes	yes	1	338	0	-1	m	m
Exp V1 Meye Znoeye	3	20	female	Finished stimuli\pehappy_upeyes.jpg	pe	happy	yes	yes	1	232	0	-1	m	m
Exp V1 Meye Znoeye	3	20	female	Finished stimuli\rhap_jumbled_noeyes.jpg	rh	happy	no	no	1	465	0	0	z	z
Exp V1 Meye Znoeye	3	20	female	Finished stimuli\rfear_upeys.jpg	rf	fear	yes	yes	1	312	0	94	m	m
Exp V1 Meye Znoeye	3	20	female	Finished stimuli\rhap_jumbledeyes.jpg	rh	happy	no	yes	1	298	0	0	m	m
Exp V1 Meye Znoeye	3	20	female	Finished stimuli\rfear_up_noeys.jpg	rf	fear	yes	no	0	335	0	-1	z	m
Exp V1 Meye Znoeye	3	20	female	Finished stimuli\cc_happy_upnoeyes.jpg	cc	happy	yes	no	1	218	0	35	z	z
Exp V1 Meye Znoeye	3	20	female	Finished stimuli\wf_hap_upeyes.jpg	wf	happy	yes	yes	1	290	0	-1	m	m
Exp V1 Meye Znoeye	3	20	female	Finished stimuli\cc_fear_up.jpg	cc	fear	yes	yes	1	279	0	-1	m	m
Exp V1 Meye Znoeye	3	20	female	Finished stimuli\sw_hap_noeyes.jpg	sw	happy	yes	no	1	300	0	0	z	z
Exp V1 Meye Znoeye	3	20	female	Finished stimuli\JJhappyupnoeyes.jpg	JJ	happy	yes	no	0	269	0	0	z	m
Exp V1 Meye Znoeye	3	20	female	Finished stimuli\pehappy_jumbled_no_eyes.jpg	pe	happy	no	no	1	501	0	-1	z	z
Exp V1 Meye Znoeye	3	20	female	Finished stimuli\mf_happy_jumbled_noeyes.jpg	mf	happy	no	no	0	642	0	-1	z	m
Exp V1 Meye Znoeye	3	20	female	Finished stimuli\jjfear_jumblednoeyes.jpg	jj	fear	no	no	0	318	0	-1	z	m
Exp V1 Meye Znoeye	3	20	female	Finished stimuli\mf_fear_up_noeye.jpg	mf	fear	yes	no	1	334	0	0	z	z
Exp V1 Meye Znoeye	3	20	female	Finished stimuli\sw_hap_upeyes.jpg	sw	happy	yes	yes	1	207	0	-1	m	m
Exp V1 Meye Znoeye	3	20	female	Finished stimuli\wf_fea_up_noeyes.jpg	wf	fear	yes	no	0	327	0	-1	z	m
Exp V1 Meye Znoeye	3	20	female	Finished stimuli\pefear_up_jumbledeyes.jpg	pe	fear	no	yes	1	279	0	-1	m	m
Exp V1 Meye Znoeye	3	20	female	Finished stimuli\jjfear_upnoeyes.jpg	jj	fear	yes	no	1	264	0	-1	z	z
Exp V1 Meye Znoeye	3	20	female	Finished stimuli\sw_fear_noeyes.jpg	sw	fear	yes	no	0	233	0	-1	z	m
Exp V1 Meye Znoeye	3	20	female	Finished stimuli\mo_hap_upeyes.jpg	mo	happy	yes	yes	1	253	0	-1	m	m
Exp V1 Meye Znoeye	3	20	female	Finished stimuli\cc_happy_jumblednoeyes.jpg	cc	happy	no	no	1	286	0	-1	z	z
Exp V1 Meye Znoeye	3	20	female	Finished stimuli\mo_fear_jumblednoeyes.jpg	mo	fear	no	no	1	331	0	0	z	z
Exp V1 Meye Znoeye	3	20	female	Finished stimuli\pehappy_noeyes.jpg	pe	happy	yes	no	1	321	0	-1	z	z
Exp V1 Meye Znoeye	3	20	female	Finished stimuli\pf_fear_up_noeyes.jpg	pf	fear	yes	no	1	404	0	0	z	z
Exp V1 Meye Znoeye	3	20	female	Finished stimuli\sw_fear_upeyes.jpg	sw	fear	yes	yes	1	171	0	0	m	m
Exp V1 Meye Znoeye	3	20	female	Finished stimuli\cc_fear_jumbledeyes.jpg	cc	fear	no	yes	1	210	0	-1	m	m
Exp V1 Meye Znoeye	3	20	female	Finished stimuli\wf_hap_jumbledeyes.jpg	wf	happy	no	yes	0	242	0	-1	z	m
Exp V1 Meye Znoeye	3	20	female	Finished stimuli\pf_fear_jumbled_noeyes.jpg	pf	fear	no	no	1	361	0	-1	z	z
Exp V1 Meye Znoeye	3	20	female	Finished stimuli\pf_hap_upeye.jpg	pf	happy	yes	yes	1	203	0	0	m	m
Exp V1 Meye Znoeye	3	20	female	Finished stimuli\mo_hap_jumblednoeyes.jpg	mo	happy	no	no	1	276	0	0	z	z
Exp V1 Meye Znoeye	3	20	female	Finished stimuli\rhap_jumbledeyes.jpg	rh	happy	no	yes	1	224	0	-1	m	m
Exp V1 Meye Znoeye	3	20	female	Finished stimuli\mo_hap_jumbledeyes.jpg	mo	happy	no	yes	1	265	0	-1	m	m
Exp V1 Meye Znoeye	3	20	female	Finished stimuli\rhap_noeyes.jpg	rh	happy	yes	no	0	189	0	-1	z	m
Exp V1 Meye Znoeye	3	20	female	Finished stimuli\mf_fear_upeye.jpg	mf	fear	yes	yes	1	245	0	-1	m	m
Exp V1 Meye Znoeye	3	20	female	Finished stimuli\pf_fear_jumbledeyes.jpg	pf	fear	no	yes	1	266	0	0	m	m
Exp V1 Meye Znoeye	3	20	female	Finished stimuli\cc_fear_up.jpg	cc	fear	yes	yes	1	229	0	-1	m	m
Exp V1 Meye Znoeye	3	20	female	Finished stimuli\JJhappyjumblednoeyes.jpg	JJ	happy	no	yes	0	218	0	0	m	z
Exp V1 Meye Znoeye	3	20	female	Finished stimuli\cc_fearjumbledno_eye.jpg	cc	fear	no	no	1	246	0	0	z	z
Exp V1 Meye Znoeye	3	20	female	Finished stimuli\JJhappyupeyes.jpg	JJ	happy	yes	yes	1	241	0	-1	m	m
Exp V1 Meye Znoeye	3	20	female	Finished stimuli\rhap.jpg	rh	happy	yes	yes	1	219	0	-1	m	m
Exp V1 Meye Znoeye	3	20	female	Finished stimuli\pefear_up_noeyes.jpg	pe	fear	yes	no	1	239	0	-1	z	z
Exp V1 Meye Znoeye	3	20	female	Finished stimuli\mo_fear_upeyes.jpg	mo	fear	yes	yes	1	195	0	-1	m	m
Exp V1 Meye Znoeye	3	20	female	Finished stimuli\pf_fear_upeyes.jpg	pf	fear	yes	yes	1	250	0	-1	m	m
Exp V1 Meye Znoeye	3	20	female	Finished stimuli\rfear_upeys.jpg	rf	fear	yes	yes	1	203	0	-1	m	m
Exp V1 Meye Znoeye	3	20	female	Finished stimuli\mf_happy_upno_eyes.jpg	mf	happy	yes	no	1	290	0	0	z	z
Exp V1 Meye Znoeye	3	20	female	Finished stimuli\pehappy_upeyes.jpg	pe	happy	yes	yes	1	171	0	-1	m	m
Exp V1 Meye Znoeye	3	20	female	Finished stimuli\mo_hap_up_noeyes.jpg	mo	happy	yes	no	1	251	0	-1	z	z
Exp V1 Meye Znoeye	3	20	female	Finished stimuli\rfear_jumbled_noeyess.jpg	rf	fear	no	no	0	212	0	-1	z	m
Exp V1 Meye Znoeye	3	20	female	Finished stimuli\pf_hap_jumbledeye.jpg	pf	happy	no	yes	1	172	0	0	m	m
Exp V1 Meye Znoeye	3	20	female	Finished stimuli\wf_hap_upeyes.jpg	wf	happy	yes	yes	1	317	0	-1	m	m
Exp V1 Meye Znoeye	3	20	female	Finished stimuli\cc_happy_upeyes.jpg	cc	happy	yes	yes	1	220	0	0	m	m
Exp V1 Meye Znoeye	3	20	female	Finished stimuli\em_hap_upeyes.jpg	em	happy	yes	yes	1	332	0	-1	m	m
Exp V1 Meye Znoeye	3	20	female	Finished stimuli\jjfear_upeyes.jpg	jj	fear	yes	yes	1	290	0	-1	m	m
Exp V1 Meye Znoeye	3	20	female	Finished stimuli\wf_hap_up_noeyes.jpg	wf	happy	yes	no	1	247	0	-1	m	m
Exp V1 Meye Znoeye	3	20	female	Finished stimuli\mf_happy_upeyes.jpg	mf	happy	yes	yes	1	214	0	0	m	m
Exp V1 Meye Znoeye	3	20	female	Finished stimuli\pefear_up_jumbled_noeyes.jpg	pe	fear	no	no	0	306	0	58	z	m
Exp V1 Meye Znoeye	3	20	female	Finished stimuli\mo_fear_jumbledeyes.jpg	mo	fear	no	yes	1	288	0	-1	m	m
Exp V1 Meye Znoeye	3	20	female	Finished stimuli\em_hap_jumbledeyes.jpg	em	happy	no	yes	1	530	0	0	m	m
Exp V1 Meye Znoeye	3	20	female	Finished stimuli\rfear_jumbledeyess.jpg	rf	fear	no	yes	1	368	0	-1	m	m
Exp V1 Meye Znoeye	3	20	female	Finished stimuli\sw_fear_jumbled_eyes.jpg	sw	fear	no	yes	1	290	0	-1	m	m
Exp V1 Meye Znoeye	3	20	female	Finished stimuli\cc_happy_jumbledeyes.jpg	cc	happy	no	yes	1	305	0	0	m	m
Exp V1 Meye Znoeye	3	20	female	Finished stimuli\rfear_up_noeys.jpg	rf	fear	yes	no	0	297	0	23	z	m
Exp V1 Meye Znoeye	3	20	female	Finished stimuli\sw_hap_noeyes.jpg	sw	happy	yes	no	1	371	0	-1	z	z
Exp V1 Meye Znoeye	3	20	female	Finished stimuli\pf_hap_jumbled_noeye.jpg	pf	happy	no	no	0	202	0	-1	z	m
Exp V1 Meye Znoeye	3	20	female	Finished stimuli\jjhap_jumbledeyes.jpg	jj	happy	no	yes	1	285	0	-1	m	m
Exp V1 Meye Znoeye	3	20	female	Finished stimuli\JJhappyupnoeyes.jpg	JJ	happy	yes	no	0	325	0	-1	z	m
Exp V1 Meye Znoeye	3	20	female	Finished stimuli\wf_hap_upeyes.jpg	wf	happy	yes	yes	1	319	0	-1	m	m
Exp V1 Meye Znoeye	3	20	female	Finished stimuli\em_hap_jumblednoeyes.jpg	em	happy	no	no	1	325	0	0	z	z
Exp V1 Meye Znoeye	3	20	female	Finished stimuli\mo_fear_upnoeyes.jpg	mo	fear	yes	no	1	279	0	-1	m	m
Exp V1 Meye Znoeye	3	20	female	Finished stimuli\mf_fear_jumbledeye.jpg	mf	fear	no	yes	1	348	0	-1	m	m
Exp V1 Meye Znoeye	3	20	female	Finished stimuli\em_fear_upeyes.jpg	em	fear	yes	yes	1	287	0	0	m	m
Exp V1 Meye Znoeye	3	20	female	Finished stimuli\em_fear_noeyes.jpg	em	fear	yes	no	1	393	0	0	z	z
Exp V1 Meye Znoeye	3	20	female	Finished stimuli\wf_fea_up eyes.jpg	wf	fear	yes	yes	1	280	0	-1	m	m
Exp V1 Meye Znoeye	3	20	female	Finished stimuli\rhap_jumbled_noeyes.jpg	rh	happy	no	no	1	185	0	0	z	z
Exp V1 Meye Znoeye	3	20	female	Finished stimuli\em_fear_jumblednoeyes.jpg	em	fear	no	no	1	312	0	-1	z	z
Exp V1 Meye Znoeye	3	20	female	Finished stimuli\jjfear_jumbledeyes.jpg	jj	fear	no	yes	1	186	0	0	m	m
Exp V1 Meye Znoeye	3	20	female	Finished stimuli\em_fear_jumbledeyes.jpg	em	fear	no	yes	1	185	0	0	m	m
Exp V1 Meye Znoeye	3	20	female	Finished stimuli\pefear_upeyes.jpg	pe	fear	yes	yes	1	416	0	-1	m	m
Exp V1 Meye Znoeye	3	20	female	Finished stimuli\sw_hap_jumbledeyes.jpg	sw	happy	no	yes	1	380	0	-1	m	m
Exp V1 Meye Znoeye	3	20	female	Finished stimuli\sw_hap_jumbled_noeyes.jpg	sw	happy	no	no	1	218	0	-1	z	z
Exp V1 Meye Znoeye	3	20	female	Finished stimuli\cc_fear_noeyes.jpg	cc	fear	yes	no	1	343	0	-1	z	z
Exp V1 Meye Znoeye	3	20	female	Finished stimuli\wf_fea_jumbled_eyes.jpg	wf	fear	no	yes	1	277	0	-1	m	m
Exp V1 Meye Znoeye	3	20	female	Finished stimuli\pf_hap_up_noeye.jpg	pf	happy	yes	no	1	278	0	0	z	z
Exp V1 Meye Znoeye	3	20	female	Finished stimuli\mf_happy_jumbledeyes.jpg	mf	happy	no	yes	1	251	0	-1	m	m
Exp V1 Meye Znoeye	3	20	female	Finished stimuli\em_hap_noeyes.jpg	em	happy	yes	no	1	312	0	0	z	z
Exp V1 Meye Znoeye	3	20	female	Finished stimuli\pehappy_jumbled_eyes.jpg	pe	happy	no	yes	1	309	0	-1	m	m
Exp V1 Meye Znoeye	3	20	female	Finished stimuli\wf_hap_jumbled_noeyes.jpg	wf	happy	no	no	0	247	0	0	z	m
Exp V1 Meye Znoeye	3	20	female	Finished stimuli\sw_fear_jumbled_noeyes.jpg	sw	fear	no	no	1	283	0	-1	z	z
Exp V1 Meye Znoeye	3	20	female	Finished stimuli\mf_fear_jumblednoeye.jpg	mf	fear	no	no	0	321	0	-1	z	m
Exp V1 Meye Znoeye	3	20	female	Finished stimuli\wf_fea_jumbled_noeyes.jpg	wf	fear	no	no	1	215	0	0	z	z
Exp V1 Meye Znoeye	3	20	female	Finished stimuli\cc_happy_upnoeyes.jpg	cc	happy	yes	no	0	358	0	-1	z	m
Exp V1 Meye Znoeye	3	20	female	Finished stimuli\pefear_upeyes.jpg	pe	fear	yes	yes	1	341	0	-1	m	m
Exp V1 Meye Znoeye	3	20	female	Finished stimuli\mf_happy_jumbled_noeyes.jpg	mf	happy	no	no	1	160	0	-1	z	z
Exp V1 Meye Znoeye	3	20	female	Finished stimuli\em_fear_upeyes.jpg	em	fear	yes	yes	1	286	0	-1	m	m
Exp V1 Meye Znoeye	3	20	female	Finished stimuli\cc_fear_noeyes.jpg	cc	fear	yes	no	1	228	0	0	z	z
Exp V1 Meye Znoeye	3	20	female	Finished stimuli\pf_fear_jumbled_noeyes.jpg	pf	fear	no	no	1	377	0	-1	z	z
Exp V1 Meye Znoeye	3	20	female	Finished stimuli\mf_fear_up_noeye.jpg	mf	fear	yes	no	1	453	0	-1	z	z
Exp V1 Meye Znoeye	3	20	female	Finished stimuli\sw_hap_upeyes.jpg	sw	happy	yes	yes	1	300	0	-1	m	m
Exp V1 Meye Znoeye	3	20	female	Finished stimuli\sw_fear_noeyes.jpg	sw	fear	yes	no	0	350	0	0	z	m
Exp V1 Meye Znoeye	3	20	female	Finished stimuli\pf_hap_jumbled_noeye.jpg	pf	happy	no	no	0	365	0	0	z	m
Exp V1 Meye Znoeye	3	20	female	Finished stimuli\pefear_up_jumbled_noeyes.jpg	pe	fear	no	no	0	352	0	-1	z	m
Exp V1 Meye Znoeye	3	20	female	Finished stimuli\jjfear_jumblednoeyes.jpg	jj	fear	no	no	1	335	0	0	z	z
Exp V1 Meye Znoeye	3	20	female	Finished stimuli\em_hap_upeyes.jpg	em	happy	yes	yes	1	349	0	0	m	m
Exp V1 Meye Znoeye	3	20	female	Finished stimuli\mf_happy_upno_eyes.jpg	mf	happy	yes	no	0	560	0	-1	z	m
Exp V1 Meye Znoeye	3	20	female	Finished stimuli\pf_hap_up_noeye.jpg	pf	happy	yes	no	1	367	0	-1	z	z
Exp V1 Meye Znoeye	3	20	female	Finished stimuli\em_fear_jumblednoeyes.jpg	em	fear	no	no	1	383	0	0	z	z
Exp V1 Meye Znoeye	3	20	female	Finished stimuli\mo_hap_jumblednoeyes.jpg	mo	happy	no	no	1	593	0	-1	z	z
Exp V1 Meye Znoeye	3	20	female	Finished stimuli\wf_fea_jumbled_noeyes.jpg	wf	fear	no	no	0	736	0	-1	z	m
Exp V1 Meye Znoeye	3	20	female	Finished stimuli\pf_fear_up_noeyes.jpg	pf	fear	yes	no	0	334	0	-1	z	m
Exp V1 Meye Znoeye	3	20	female	Finished stimuli\pf_hap_upeye.jpg	pf	happy	yes	yes	1	432	0	-1	m	m
Exp V1 Meye Znoeye	3	20	female	Finished stimuli\sw_hap_noeyes.jpg	sw	happy	yes	no	1	501	0	-1	z	z
Exp V1 Meye Znoeye	3	20	female	Finished stimuli\pf_fear_jumbledeyes.jpg	pf	fear	no	yes	1	347	0	-1	m	m
Exp V1 Meye Znoeye	3	20	female	Finished stimuli\mf_fear_upeye.jpg	mf	fear	yes	yes	1	371	0	0	m	m
Exp V1 Meye Znoeye	3	20	female	Finished stimuli\rhap_noeyes.jpg	rh	happy	yes	no	0	332	0	-1	z	m
Exp V1 Meye Znoeye	3	20	female	Finished stimuli\cc_happy_jumblednoeyes.jpg	cc	happy	no	no	1	415	0	-1	z	z
Exp V1 Meye Znoeye	3	20	female	Finished stimuli\cc_fear_jumbledeyes.jpg	cc	fear	no	yes	1	303	0	-1	m	m
Exp V1 Meye Znoeye	3	20	female	Finished stimuli\mf_fear_jumblednoeye.jpg	mf	fear	no	no	0	336	0	-1	z	m
Exp V1 Meye Znoeye	3	20	female	Finished stimuli\wf_fea_jumbled_eyes.jpg	wf	fear	no	yes	1	326	0	-1	m	m
Exp V1 Meye Znoeye	3	20	female	Finished stimuli\sw_hap_jumbled_noeyes.jpg	sw	happy	no	no	0	536	0	-1	z	m
Exp V1 Meye Znoeye	3	20	female	Finished stimuli\pehappy_jumbled_no_eyes.jpg	pe	happy	no	no	0	359	0	0	z	m
Exp V1 Meye Znoeye	3	20	female	Finished stimuli\sw_fear_upeyes.jpg	sw	fear	yes	yes	1	311	0	0	m	m
Exp V1 Meye Znoeye	3	20	female	Finished stimuli\JJhappyupeyes.jpg	JJ	happy	yes	yes	1	313	0	0	m	m
Exp V1 Meye Znoeye	3	20	female	Finished stimuli\wf_hap_up_noeyes.jpg	wf	happy	yes	no	1	330	0	-1	m	m
Exp V1 Meye Znoeye	3	20	female	Finished stimuli\rfear_jumbledeyess.jpg	rf	fear	no	yes	1	276	0	-1	m	m
Exp V1 Meye Znoeye	3	20	female	Finished stimuli\pefear_up_noeyes.jpg	pe	fear	yes	no	1	397	0	-1	z	z
Exp V1 Meye Znoeye	3	20	female	Finished stimuli\mf_happy_jumbledeyes.jpg	mf	happy	no	yes	1	314	0	0	m	m
Exp V1 Meye Znoeye	3	20	female	Finished stimuli\cc_fearjumbledno_eye.jpg	cc	fear	no	no	1	370	0	-1	z	z
Exp V1 Meye Znoeye	3	20	female	Finished stimuli\pf_fear_upeyes.jpg	pf	fear	yes	yes	1	332	0	-1	m	m
Exp V1 Meye Znoeye	3	20	female	Finished stimuli\JJhappyjumblednoeyes.jpg	JJ	happy	no	yes	1	378	0	-1	m	m
Exp V1 Meye Znoeye	3	20	female	Finished stimuli\rhap_jumbled_noeyes.jpg	rh	happy	no	no	1	611	0	0	z	z
Exp V1 Meye Znoeye	3	20	female	Finished stimuli\rfear_upeys.jpg	rf	fear	yes	yes	1	302	0	0	m	m
Exp V1 Meye Znoeye	3	20	female	Finished stimuli\mf_fear_jumbledeye.jpg	mf	fear	no	yes	1	387	0	0	m	m
Exp V1 Meye Znoeye	3	20	female	Finished stimuli\rfear_up_noeys.jpg	rf	fear	yes	no	0	328	0	0	z	m
Exp V1 Meye Znoeye	3	20	female	Finished stimuli\sw_fear_jumbled_noeyes.jpg	sw	fear	no	no	0	446	0	-1	z	m
Exp V1 Meye Znoeye	3	20	female	Finished stimuli\cc_happy_jumbledeyes.jpg	cc	happy	no	yes	1	310	0	-1	m	m
Exp V1 Meye Znoeye	3	20	female	Finished stimuli\jjhap_jumbledeyes.jpg	jj	happy	no	yes	1	311	0	-1	m	m
Exp V1 Meye Znoeye	3	20	female	Finished stimuli\cc_fear_up.jpg	cc	fear	yes	yes	1	271	0	-1	m	m
Exp V1 Meye Znoeye	3	20	female	Finished stimuli\em_hap_jumblednoeyes.jpg	em	happy	no	no	1	496	0	-1	z	z
Exp V1 Meye Znoeye	3	20	female	Finished stimuli\mo_fear_jumbledeyes.jpg	mo	fear	no	yes	1	231	0	0	m	m
Exp V1 Meye Znoeye	3	20	female	Finished stimuli\mo_fear_upeyes.jpg	mo	fear	yes	yes	1	294	0	-1	m	m
Exp V1 Meye Znoeye	3	20	female	Finished stimuli\wf_fea_up_noeyes.jpg	wf	fear	yes	no	0	315	0	-1	z	m
Exp V1 Meye Znoeye	3	20	female	Finished stimuli\pefear_up_jumbledeyes.jpg	pe	fear	no	yes	1	269	0	-1	m	m
Exp V1 Meye Znoeye	3	20	female	Finished stimuli\jjfear_jumbledeyes.jpg	jj	fear	no	yes	1	298	0	-1	m	m
Exp V1 Meye Znoeye	3	20	female	Finished stimuli\pehappy_jumbled_eyes.jpg	pe	happy	no	yes	1	311	0	-1	m	m
Exp V1 Meye Znoeye	3	20	female	Finished stimuli\jjfear_upnoeyes.jpg	jj	fear	yes	no	1	397	0	-1	z	z
Exp V1 Meye Znoeye	3	20	female	Finished stimuli\JJhappyupnoeyes.jpg	JJ	happy	yes	no	0	236	0	-1	z	m
Exp V1 Meye Znoeye	3	20	female	Finished stimuli\cc_happy_upnoeyes.jpg	cc	happy	yes	no	0	547	0	-1	z	m
Exp V1 Meye Znoeye	3	20	female	Finished stimuli\em_fear_jumbledeyes.jpg	em	fear	no	yes	1	359	0	0	m	m
Exp V1 Meye Znoeye	3	20	female	Finished stimuli\jjfear_upeyes.jpg	jj	fear	yes	yes	1	353	0	-1	m	m
Exp V1 Meye Znoeye	3	20	female	Finished stimuli\em_hap_jumbledeyes.jpg	em	happy	no	yes	1	372	0	-1	m	m
Exp V1 Meye Znoeye	3	20	female	Finished stimuli\em_fear_noeyes.jpg	em	fear	yes	no	1	331	0	-1	z	z
Exp V1 Meye Znoeye	3	20	female	Finished stimuli\mo_hap_up_noeyes.jpg	mo	happy	yes	no	0	334	0	-1	z	m
Exp V1 Meye Znoeye	3	20	female	Finished stimuli\rhap_jumbledeyes.jpg	rh	happy	no	yes	0	472	0	0	m	z
Exp V1 Meye Znoeye	3	20	female	Finished stimuli\wf_hap_upeyes.jpg	wf	happy	yes	yes	1	422	0	0	m	m
Exp V1 Meye Znoeye	3	20	female	Finished stimuli\pf_hap_jumbledeye.jpg	pf	happy	no	yes	1	344	0	-1	m	m
Exp V1 Meye Znoeye	3	20	female	Finished stimuli\mo_hap_jumbledeyes.jpg	mo	happy	no	yes	1	307	0	0	m	m
Exp V1 Meye Znoeye	3	20	female	Finished stimuli\wf_fea_up eyes.jpg	wf	fear	yes	yes	1	359	0	0	m	m
Exp V1 Meye Znoeye	3	20	female	Finished stimuli\mf_happy_upeyes.jpg	mf	happy	yes	yes	1	287	0	0	m	m
Exp V1 Meye Znoeye	3	20	female	Finished stimuli\pehappy_upeyes.jpg	pe	happy	yes	yes	1	395	0	-1	m	m
Exp V1 Meye Znoeye	3	20	female	Finished stimuli\mo_fear_jumblednoeyes.jpg	mo	fear	no	no	1	515	0	-1	z	z
Exp V1 Meye Znoeye	3	20	female	Finished stimuli\sw_hap_jumbledeyes.jpg	sw	happy	no	yes	1	221	0	-1	m	m
Exp V1 Meye Znoeye	3	20	female	Finished stimuli\mo_fear_upnoeyes.jpg	mo	fear	yes	no	1	314	0	0	m	m
Exp V1 Meye Znoeye	3	20	female	Finished stimuli\wf_hap_jumbled_noeyes.jpg	wf	happy	no	no	1	327	0	-1	z	z
Exp V1 Meye Znoeye	3	20	female	Finished stimuli\pehappy_noeyes.jpg	pe	happy	yes	no	0	337	0	-1	z	m
Exp V1 Meye Znoeye	3	20	female	Finished stimuli\rfear_jumbled_noeyess.jpg	rf	fear	no	no	1	319	0	-1	z	z
Exp V1 Meye Znoeye	3	20	female	Finished stimuli\em_hap_noeyes.jpg	em	happy	yes	no	0	350	0	0	z	m
Exp V1 Meye Znoeye	3	20	female	Finished stimuli\mo_hap_upeyes.jpg	mo	happy	yes	yes	1	316	0	-1	m	m
Exp V1 Meye Znoeye	3	20	female	Finished stimuli\cc_happy_upeyes.jpg	cc	happy	yes	yes	1	373	0	-1	m	m
Exp V1 Meye Znoeye	3	20	female	Finished stimuli\sw_fear_jumbled_eyes.jpg	sw	fear	no	yes	1	416	0	-1	m	m
Exp V1 Meye Znoeye	3	20	female	Finished stimuli\rhap.jpg	rh	happy	yes	yes	1	373	0	0	m	m
Exp V1 Meye Znoeye	3	20	female	Finished stimuli\wf_hap_jumbledeyes.jpg	wf	happy	no	yes	0	423	0	0	z	m
Exp V1 Meye Znoeye	3	20	female	Finished stimuli\wf_hap_upeyes.jpg	wf	happy	yes	yes	1	383	0	0	m	m
Exp V1 Meye Znoeye	4	19	female	Finished stimuli\pf_hap_upeye.jpg	pf	happy	yes	yes	1	484	0	-2	m	m
Exp V1 Meye Znoeye	4	19	female	Finished stimuli\wf_hap_up_noeyes.jpg	wf	happy	yes	no	1	475	0	-2	m	m
Exp V1 Meye Znoeye	4	19	female	Finished stimuli\cc_happy_upeyes.jpg	cc	happy	yes	yes	0	482	0	-2	m	z
Exp V1 Meye Znoeye	4	19	female	Finished stimuli\cc_fearjumbledno_eye.jpg	cc	fear	no	no	0	564	0	-3	z	m
Exp V1 Meye Znoeye	4	19	female	Finished stimuli\em_hap_jumblednoeyes.jpg	em	happy	no	no	0	586	0	-2	z	m
Exp V1 Meye Znoeye	4	19	female	Finished stimuli\mo_fear_jumbledeyes.jpg	mo	fear	no	yes	1	354	0	-3	m	m
Exp V1 Meye Znoeye	4	19	female	Finished stimuli\JJhappyupnoeyes.jpg	JJ	happy	yes	no	0	482	0	-3	z	m
Exp V1 Meye Znoeye	4	19	female	Finished stimuli\cc_fear_up.jpg	cc	fear	yes	yes	1	445	0	-3	m	m
Exp V1 Meye Znoeye	4	19	female	Finished stimuli\pf_hap_jumbled_noeye.jpg	pf	happy	no	no	0	499	0	-3	z	m
Exp V1 Meye Znoeye	4	19	female	Finished stimuli\pf_hap_up_noeye.jpg	pf	happy	yes	no	1	359	0	-2	z	z
Exp V1 Meye Znoeye	4	19	female	Finished stimuli\jjfear_upnoeyes.jpg	jj	fear	yes	no	1	667	0	-3	z	z
Exp V1 Meye Znoeye	4	19	female	Finished stimuli\em_fear_upeyes.jpg	em	fear	yes	yes	1	435	0	-3	m	m
Exp V1 Meye Znoeye	4	19	female	Finished stimuli\cc_happy_jumblednoeyes.jpg	cc	happy	no	no	0	505	0	-2	z	m
Exp V1 Meye Znoeye	4	19	female	Finished stimuli\mf_happy_upeyes.jpg	mf	happy	yes	yes	1	433	0	-3	m	m
Exp V1 Meye Znoeye	4	19	female	Finished stimuli\pehappy_noeyes.jpg	pe	happy	yes	no	1	440	0	-3	z	z
Exp V1 Meye Znoeye	4	19	female	Finished stimuli\sw_hap_noeyes.jpg	sw	happy	yes	no	0	511	0	-3	z	m
Exp V1 Meye Znoeye	4	19	female	Finished stimuli\mf_happy_upno_eyes.jpg	mf	happy	yes	no	0	472	0	-2	z	m
Exp V1 Meye Znoeye	4	19	female	Finished stimuli\wf_fea_jumbled_eyes.jpg	wf	fear	no	yes	1	457	0	-2	m	m
Exp V1 Meye Znoeye	4	19	female	Finished stimuli\em_fear_jumblednoeyes.jpg	em	fear	no	no	1	347	0	-3	z	z
Exp V1 Meye Znoeye	4	19	female	Finished stimuli\wf_hap_jumbledeyes.jpg	wf	happy	no	yes	0	387	0	-3	z	m
Exp V1 Meye Znoeye	4	19	female	Finished stimuli\rhap_noeyes.jpg	rh	happy	yes	no	0	445	0	-2	z	m
Exp V1 Meye Znoeye	4	19	female	Finished stimuli\mo_fear_jumblednoeyes.jpg	mo	fear	no	no	0	468	0	-3	z	m
Exp V1 Meye Znoeye	4	19	female	Finished stimuli\wf_hap_upeyes.jpg	wf	happy	yes	yes	0	379	0	-2	m	z
Exp V1 Meye Znoeye	4	19	female	Finished stimuli\sw_fear_jumbled_eyes.jpg	sw	fear	no	yes	1	490	0	-2	m	m
Exp V1 Meye Znoeye	4	19	female	Finished stimuli\sw_hap_jumbledeyes.jpg	sw	happy	no	yes	1	413	0	-3	m	m
Exp V1 Meye Znoeye	4	19	female	Finished stimuli\sw_fear_jumbled_noeyes.jpg	sw	fear	no	no	1	355	0	-3	z	z
Exp V1 Meye Znoeye	4	19	female	Finished stimuli\jjfear_upeyes.jpg	jj	fear	yes	yes	1	461	0	-3	m	m
Exp V1 Meye Znoeye	4	19	female	Finished stimuli\cc_fear_noeyes.jpg	cc	fear	yes	no	1	389	0	-2	z	z
Exp V1 Meye Znoeye	4	19	female	Finished stimuli\pefear_up_noeyes.jpg	pe	fear	yes	no	1	431	0	-2	z	z
Exp V1 Meye Znoeye	4	19	female	Finished stimuli\pf_fear_jumbledeyes.jpg	pf	fear	no	yes	1	1017	0	-3	m	m
Exp V1 Meye Znoeye	4	19	female	Finished stimuli\pehappy_jumbled_no_eyes.jpg	pe	happy	no	no	0	528	0	-3	z	m
Exp V1 Meye Znoeye	4	19	female	Finished stimuli\sw_hap_jumbled_noeyes.jpg	sw	happy	no	no	0	456	0	-3	z	m
Exp V1 Meye Znoeye	4	19	female	Finished stimuli\pefear_up_jumbled_noeyes.jpg	pe	fear	no	no	1	471	0	-3	z	z
Exp V1 Meye Znoeye	4	19	female	Finished stimuli\mo_fear_upeyes.jpg	mo	fear	yes	yes	1	419	0	-2	m	m
Exp V1 Meye Znoeye	4	19	female	Finished stimuli\rfear_upeys.jpg	rf	fear	yes	yes	1	377	0	-2	m	m
Exp V1 Meye Znoeye	4	19	female	Finished stimuli\mf_fear_jumbledeye.jpg	mf	fear	no	yes	1	351	0	-3	m	m
Exp V1 Meye Znoeye	4	19	female	Finished stimuli\em_fear_jumbledeyes.jpg	em	fear	no	yes	1	388	0	-3	m	m
Exp V1 Meye Znoeye	4	19	female	Finished stimuli\rfear_jumbledeyess.jpg	rf	fear	no	yes	1	406	0	-3	m	m
Exp V1 Meye Znoeye	4	19	female	Finished stimuli\em_hap_upeyes.jpg	em	happy	yes	yes	0	429	0	-2	m	z
Exp V1 Meye Znoeye	4	19	female	Finished stimuli\wf_fea_up eyes.jpg	wf	fear	yes	yes	1	388	0	-2	m	m
Exp V1 Meye Znoeye	4	19	female	Finished stimuli\em_hap_jumbledeyes.jpg	em	happy	no	yes	0	658	0	-3	m	z
Exp V1 Meye Znoeye	4	19	female	Finished stimuli\rfear_jumbled_noeyess.jpg	rf	fear	no	no	1	394	0	-2	z	z
Exp V1 Meye Znoeye	4	19	female	Finished stimuli\jjfear_jumblednoeyes.jpg	jj	fear	no	no	1	471	0	-3	z	z
Exp V1 Meye Znoeye	4	19	female	Finished stimuli\pefear_up_jumbledeyes.jpg	pe	fear	no	yes	1	412	0	-2	m	m
Exp V1 Meye Znoeye	4	19	female	Finished stimuli\mo_hap_up_noeyes.jpg	mo	happy	yes	no	1	422	0	-3	z	z
Exp V1 Meye Znoeye	4	19	female	Finished stimuli\mo_hap_jumbledeyes.jpg	mo	happy	no	yes	1	393	0	-2	m	m
Exp V1 Meye Znoeye	4	19	female	Finished stimuli\pf_fear_jumbled_noeyes.jpg	pf	fear	no	no	1	247	0	-2	z	z
Exp V1 Meye Znoeye	4	19	female	Finished stimuli\rhap.jpg	rh	happy	yes	yes	1	326	0	-3	m	m
Exp V1 Meye Znoeye	4	19	female	Finished stimuli\mf_fear_up_noeye.jpg	mf	fear	yes	no	1	319	0	-2	z	z
Exp V1 Meye Znoeye	4	19	female	Finished stimuli\pf_hap_jumbledeye.jpg	pf	happy	no	yes	1	448	0	-2	m	m
Exp V1 Meye Znoeye	4	19	female	Finished stimuli\JJhappyupeyes.jpg	JJ	happy	yes	yes	1	395	0	-3	m	m
Exp V1 Meye Znoeye	4	19	female	Finished stimuli\JJhappyjumblednoeyes.jpg	JJ	happy	no	yes	0	376	0	-3	m	z
Exp V1 Meye Znoeye	4	19	female	Finished stimuli\rhap_jumbledeyes.jpg	rh	happy	no	yes	1	358	0	-3	m	m
Exp V1 Meye Znoeye	4	19	female	Finished stimuli\jjfear_jumbledeyes.jpg	jj	fear	no	yes	1	340	0	-2	m	m
Exp V1 Meye Znoeye	4	19	female	Finished stimuli\mo_hap_upeyes.jpg	mo	happy	yes	yes	0	469	0	-2	m	z
Exp V1 Meye Znoeye	4	19	female	Finished stimuli\cc_happy_upnoeyes.jpg	cc	happy	yes	no	1	432	0	-3	z	z
Exp V1 Meye Znoeye	4	19	female	Finished stimuli\pf_fear_up_noeyes.jpg	pf	fear	yes	no	1	443	0	-3	z	z
Exp V1 Meye Znoeye	4	19	female	Finished stimuli\mo_fear_upnoeyes.jpg	mo	fear	yes	no	0	611	0	-3	m	z
Exp V1 Meye Znoeye	4	19	female	Finished stimuli\mo_hap_jumblednoeyes.jpg	mo	happy	no	no	0	356	0	-3	z	m
Exp V1 Meye Znoeye	4	19	female	Finished stimuli\mf_happy_jumbledeyes.jpg	mf	happy	no	yes	1	386	0	-3	m	m
Exp V1 Meye Znoeye	4	19	female	Finished stimuli\wf_fea_jumbled_noeyes.jpg	wf	fear	no	no	0	468	0	-3	z	m
Exp V1 Meye Znoeye	4	19	female	Finished stimuli\wf_hap_jumbled_noeyes.jpg	wf	happy	no	no	1	339	0	-2	z	z
Exp V1 Meye Znoeye	4	19	female	Finished stimuli\mf_happy_jumbled_noeyes.jpg	mf	happy	no	no	1	357	0	-3	z	z
Exp V1 Meye Znoeye	4	19	female	Finished stimuli\pefear_upeyes.jpg	pe	fear	yes	yes	1	442	0	-3	m	m
Exp V1 Meye Znoeye	4	19	female	Finished stimuli\pehappy_upeyes.jpg	pe	happy	yes	yes	1	381	0	-3	m	m
Exp V1 Meye Znoeye	4	19	female	Finished stimuli\sw_fear_noeyes.jpg	sw	fear	yes	no	1	347	0	-3	z	z
Exp V1 Meye Znoeye	4	19	female	Finished stimuli\mf_fear_upeye.jpg	mf	fear	yes	yes	1	400	0	-3	m	m
Exp V1 Meye Znoeye	4	19	female	Finished stimuli\cc_fear_jumbledeyes.jpg	cc	fear	no	yes	1	440	0	-2	m	m
Exp V1 Meye Znoeye	4	19	female	Finished stimuli\cc_happy_jumbledeyes.jpg	cc	happy	no	yes	1	466	0	-3	m	m
Exp V1 Meye Znoeye	4	19	female	Finished stimuli\pehappy_jumbled_eyes.jpg	pe	happy	no	yes	1	578	0	-2	m	m
Exp V1 Meye Znoeye	4	19	female	Finished stimuli\rhap_jumbled_noeyes.jpg	rh	happy	no	no	1	340	0	-2	z	z
Exp V1 Meye Znoeye	4	19	female	Finished stimuli\pf_fear_upeyes.jpg	pf	fear	yes	yes	1	416	0	-3	m	m
Exp V1 Meye Znoeye	4	19	female	Finished stimuli\em_fear_noeyes.jpg	em	fear	yes	no	1	475	0	-3	z	z
Exp V1 Meye Znoeye	4	19	female	Finished stimuli\jjhap_jumbledeyes.jpg	jj	happy	no	yes	1	451	0	-3	m	m
Exp V1 Meye Znoeye	4	19	female	Finished stimuli\wf_hap_upeyes.jpg	wf	happy	yes	yes	1	402	0	-3	m	m
Exp V1 Meye Znoeye	4	19	female	Finished stimuli\mf_fear_jumblednoeye.jpg	mf	fear	no	no	0	469	0	-3	z	m
Exp V1 Meye Znoeye	4	19	female	Finished stimuli\wf_fea_up_noeyes.jpg	wf	fear	yes	no	0	425	0	-3	z	m
Exp V1 Meye Znoeye	4	19	female	Finished stimuli\sw_hap_upeyes.jpg	sw	happy	yes	yes	1	421	0	-2	m	m
Exp V1 Meye Znoeye	4	19	female	Finished stimuli\em_hap_noeyes.jpg	em	happy	yes	no	1	367	0	-2	z	z
Exp V1 Meye Znoeye	4	19	female	Finished stimuli\sw_fear_upeyes.jpg	sw	fear	yes	yes	1	389	0	-3	m	m
Exp V1 Meye Znoeye	4	19	female	Finished stimuli\rfear_up_noeys.jpg	rf	fear	yes	no	0	431	0	-3	z	m
Exp V1 Meye Znoeye	4	19	female	Finished stimuli\em_fear_upeyes.jpg	em	fear	yes	yes	1	386	0	-3	m	m
Exp V1 Meye Znoeye	4	19	female	Finished stimuli\cc_happy_jumbledeyes.jpg	cc	happy	no	yes	1	392	0	-3	m	m
Exp V1 Meye Znoeye	4	19	female	Finished stimuli\rfear_upeys.jpg	rf	fear	yes	yes	1	450	0	-3	m	m
Exp V1 Meye Znoeye	4	19	female	Finished stimuli\mf_fear_upeye.jpg	mf	fear	yes	yes	1	621	0	-3	m	m
Exp V1 Meye Znoeye	4	19	female	Finished stimuli\JJhappyjumblednoeyes.jpg	JJ	happy	no	yes	0	706	0	-3	m	z
Exp V1 Meye Znoeye	4	19	female	Finished stimuli\mo_fear_upeyes.jpg	mo	fear	yes	yes	1	439	0	-3	m	m
Exp V1 Meye Znoeye	4	19	female	Finished stimuli\sw_fear_noeyes.jpg	sw	fear	yes	no	1	402	0	-3	z	z
Exp V1 Meye Znoeye	4	19	female	Finished stimuli\sw_hap_noeyes.jpg	sw	happy	yes	no	1	493	0	-3	z	z
Exp V1 Meye Znoeye	4	19	female	Finished stimuli\wf_hap_jumbled_noeyes.jpg	wf	happy	no	no	1	534	0	-2	z	z
Exp V1 Meye Znoeye	4	19	female	Finished stimuli\pefear_up_jumbled_noeyes.jpg	pe	fear	no	no	1	551	0	-2	z	z
Exp V1 Meye Znoeye	4	19	female	Finished stimuli\em_fear_noeyes.jpg	em	fear	yes	no	1	536	0	-3	z	z
Exp V1 Meye Znoeye	4	19	female	Finished stimuli\mf_fear_jumbledeye.jpg	mf	fear	no	yes	1	413	0	-3	m	m
Exp V1 Meye Znoeye	4	19	female	Finished stimuli\jjfear_upeyes.jpg	jj	fear	yes	yes	1	432	0	-3	m	m
Exp V1 Meye Znoeye	4	19	female	Finished stimuli\pehappy_jumbled_no_eyes.jpg	pe	happy	no	no	1	592	0	-2	z	z
Exp V1 Meye Znoeye	4	19	female	Finished stimuli\rfear_jumbled_noeyess.jpg	rf	fear	no	no	1	392	0	-3	z	z
Exp V1 Meye Znoeye	4	19	female	Finished stimuli\sw_hap_jumbledeyes.jpg	sw	happy	no	yes	0	558	0	-3	m	z
Exp V1 Meye Znoeye	4	19	female	Finished stimuli\JJhappyupeyes.jpg	JJ	happy	yes	yes	1	384	0	-3	m	m
Exp V1 Meye Znoeye	4	19	female	Finished stimuli\pf_fear_upeyes.jpg	pf	fear	yes	yes	1	474	0	-2	m	m
Exp V1 Meye Znoeye	4	19	female	Finished stimuli\pf_hap_up_noeye.jpg	pf	happy	yes	no	1	402	0	-2	z	z
Exp V1 Meye Znoeye	4	19	female	Finished stimuli\mo_hap_upeyes.jpg	mo	happy	yes	yes	1	569	0	-2	m	m
Exp V1 Meye Znoeye	4	19	female	Finished stimuli\mo_hap_jumbledeyes.jpg	mo	happy	no	yes	1	427	0	-2	m	m
Exp V1 Meye Znoeye	4	19	female	Finished stimuli\cc_happy_upeyes.jpg	cc	happy	yes	yes	1	586	0	-2	m	m
Exp V1 Meye Znoeye	4	19	female	Finished stimuli\wf_fea_up_noeyes.jpg	wf	fear	yes	no	0	803	0	-3	z	m
Exp V1 Meye Znoeye	4	19	female	Finished stimuli\mo_hap_up_noeyes.jpg	mo	happy	yes	no	0	604	0	-3	z	m
Exp V1 Meye Znoeye	4	19	female	Finished stimuli\rfear_up_noeys.jpg	rf	fear	yes	no	0	551	0	-2	z	m
Exp V1 Meye Znoeye	4	19	female	Finished stimuli\em_fear_jumblednoeyes.jpg	em	fear	no	no	1	323	0	-3	z	z
Exp V1 Meye Znoeye	4	19	female	Finished stimuli\mf_fear_jumblednoeye.jpg	mf	fear	no	no	1	497	0	-2	z	z
Exp V1 Meye Znoeye	4	19	female	Finished stimuli\em_fear_jumbledeyes.jpg	em	fear	no	yes	1	545	0	-2	m	m
Exp V1 Meye Znoeye	4	19	female	Finished stimuli\pefear_up_jumbledeyes.jpg	pe	fear	no	yes	1	566	0	-3	m	m
Exp V1 Meye Znoeye	4	19	female	Finished stimuli\mo_fear_jumblednoeyes.jpg	mo	fear	no	no	1	400	0	-2	z	z
Exp V1 Meye Znoeye	4	19	female	Finished stimuli\cc_happy_jumblednoeyes.jpg	cc	happy	no	no	1	470	0	-3	z	z
Exp V1 Meye Znoeye	4	19	female	Finished stimuli\mf_happy_jumbled_noeyes.jpg	mf	happy	no	no	1	586	0	-3	z	z
Exp V1 Meye Znoeye	4	19	female	Finished stimuli\wf_hap_jumbledeyes.jpg	wf	happy	no	yes	0	424	0	-2	z	m
Exp V1 Meye Znoeye	4	19	female	Finished stimuli\rhap_noeyes.jpg	rh	happy	yes	no	0	458	0	-2	z	m
Exp V1 Meye Znoeye	4	19	female	Finished stimuli\wf_fea_up eyes.jpg	wf	fear	yes	yes	1	465	0	-3	m	m
Exp V1 Meye Znoeye	4	19	female	Finished stimuli\JJhappyupnoeyes.jpg	JJ	happy	yes	no	0	549	0	-2	z	m
Exp V1 Meye Znoeye	4	19	female	Finished stimuli\cc_fear_jumbledeyes.jpg	cc	fear	no	yes	1	534	0	-3	m	m
Exp V1 Meye Znoeye	4	19	female	Finished stimuli\mo_fear_jumbledeyes.jpg	mo	fear	no	yes	1	1011	0	-3	m	m
Exp V1 Meye Znoeye	4	19	female	Finished stimuli\jjfear_jumbledeyes.jpg	jj	fear	no	yes	1	686	0	-2	m	m
Exp V1 Meye Znoeye	4	19	female	Finished stimuli\jjhap_jumbledeyes.jpg	jj	happy	no	yes	0	302	0	-2	m	z
Exp V1 Meye Znoeye	4	19	female	Finished stimuli\rfear_jumbledeyess.jpg	rf	fear	no	yes	1	462	0	-3	m	m
Exp V1 Meye Znoeye	4	19	female	Finished stimuli\rhap.jpg	rh	happy	yes	yes	0	413	0	-3	m	z
Exp V1 Meye Znoeye	4	19	female	Finished stimuli\sw_hap_jumbled_noeyes.jpg	sw	happy	no	no	1	559	0	-3	z	z
Exp V1 Meye Znoeye	4	19	female	Finished stimuli\jjfear_jumblednoeyes.jpg	jj	fear	no	no	0	454	0	-2	z	m
Exp V1 Meye Znoeye	4	19	female	Finished stimuli\wf_hap_upeyes.jpg	wf	happy	yes	yes	0	398	0	-2	m	z
Exp V1 Meye Znoeye	4	19	female	Finished stimuli\rhap_jumbledeyes.jpg	rh	happy	no	yes	1	463	0	-3	m	m
Exp V1 Meye Znoeye	4	19	female	Finished stimuli\mf_happy_upeyes.jpg	mf	happy	yes	yes	0	384	0	-2	m	z
Exp V1 Meye Znoeye	4	19	female	Finished stimuli\sw_hap_upeyes.jpg	sw	happy	yes	yes	1	453	0	-3	m	m
Exp V1 Meye Znoeye	4	19	female	Finished stimuli\sw_fear_jumbled_noeyes.jpg	sw	fear	no	no	0	832	0	-3	z	m
Exp V1 Meye Znoeye	4	19	female	Finished stimuli\mo_fear_upnoeyes.jpg	mo	fear	yes	no	1	515	0	-3	m	m
Exp V1 Meye Znoeye	4	19	female	Finished stimuli\pefear_upeyes.jpg	pe	fear	yes	yes	1	536	0	-3	m	m
Exp V1 Meye Znoeye	4	19	female	Finished stimuli\em_hap_jumbledeyes.jpg	em	happy	no	yes	0	380	0	-3	m	z
Exp V1 Meye Znoeye	4	19	female	Finished stimuli\rhap_jumbled_noeyes.jpg	rh	happy	no	no	1	494	0	-3	z	z
Exp V1 Meye Znoeye	4	19	female	Finished stimuli\wf_hap_up_noeyes.jpg	wf	happy	yes	no	0	578	0	-3	m	z
Exp V1 Meye Znoeye	4	19	female	Finished stimuli\sw_fear_jumbled_eyes.jpg	sw	fear	no	yes	1	484	0	-3	m	m
Exp V1 Meye Znoeye	4	19	female	Finished stimuli\pf_fear_jumbledeyes.jpg	pf	fear	no	yes	1	656	0	-3	m	m
Exp V1 Meye Znoeye	4	19	female	Finished stimuli\pf_hap_upeye.jpg	pf	happy	yes	yes	0	551	0	-3	m	z
Exp V1 Meye Znoeye	4	19	female	Finished stimuli\em_hap_noeyes.jpg	em	happy	yes	no	0	456	0	-3	z	m
Exp V1 Meye Znoeye	4	19	female	Finished stimuli\cc_fear_up.jpg	cc	fear	yes	yes	0	618	0	-3	m	z
Exp V1 Meye Znoeye	4	19	female	Finished stimuli\mf_happy_jumbledeyes.jpg	mf	happy	no	yes	1	541	0	-3	m	m
Exp V1 Meye Znoeye	4	19	female	Finished stimuli\wf_hap_upeyes.jpg	wf	happy	yes	yes	0	633	0	-3	m	z
Exp V1 Meye Znoeye	4	19	female	Finished stimuli\pf_hap_jumbled_noeye.jpg	pf	happy	no	no	0	416	0	-3	z	m
Exp V1 Meye Znoeye	4	19	female	Finished stimuli\pehappy_noeyes.jpg	pe	happy	yes	no	0	367	0	-3	z	m
Exp V1 Meye Znoeye	4	19	female	Finished stimuli\cc_fearjumbledno_eye.jpg	cc	fear	no	no	0	505	0	-2	z	m
Exp V1 Meye Znoeye	4	19	female	Finished stimuli\em_hap_jumblednoeyes.jpg	em	happy	no	no	1	369	0	-3	z	z
Exp V1 Meye Znoeye	4	19	female	Finished stimuli\cc_fear_noeyes.jpg	cc	fear	yes	no	1	523	0	-3	z	z
Exp V1 Meye Znoeye	4	19	female	Finished stimuli\pf_hap_jumbledeye.jpg	pf	happy	no	yes	1	437	0	-2	m	m
Exp V1 Meye Znoeye	4	19	female	Finished stimuli\pf_fear_up_noeyes.jpg	pf	fear	yes	no	1	492	0	-2	z	z
Exp V1 Meye Znoeye	4	19	female	Finished stimuli\pehappy_upeyes.jpg	pe	happy	yes	yes	1	420	0	-3	m	m
Exp V1 Meye Znoeye	4	19	female	Finished stimuli\cc_happy_upnoeyes.jpg	cc	happy	yes	no	1	438	0	-2	z	z
Exp V1 Meye Znoeye	4	19	female	Finished stimuli\wf_fea_jumbled_noeyes.jpg	wf	fear	no	no	0	425	0	-3	z	m
Exp V1 Meye Znoeye	4	19	female	Finished stimuli\pehappy_jumbled_eyes.jpg	pe	happy	no	yes	1	379	0	-3	m	m
Exp V1 Meye Znoeye	4	19	female	Finished stimuli\jjfear_upnoeyes.jpg	jj	fear	yes	no	1	481	0	-3	z	z
Exp V1 Meye Znoeye	4	19	female	Finished stimuli\pefear_up_noeyes.jpg	pe	fear	yes	no	1	361	0	-3	z	z
Exp V1 Meye Znoeye	4	19	female	Finished stimuli\em_hap_upeyes.jpg	em	happy	yes	yes	0	1303	0	-2	m	z
Exp V1 Meye Znoeye	4	19	female	Finished stimuli\mf_happy_upno_eyes.jpg	mf	happy	yes	no	1	455	0	-3	z	z
Exp V1 Meye Znoeye	4	19	female	Finished stimuli\mf_fear_up_noeye.jpg	mf	fear	yes	no	1	499	0	-3	z	z
Exp V1 Meye Znoeye	4	19	female	Finished stimuli\mo_hap_jumblednoeyes.jpg	mo	happy	no	no	1	607	0	-3	z	z
Exp V1 Meye Znoeye	4	19	female	Finished stimuli\wf_fea_jumbled_eyes.jpg	wf	fear	no	yes	1	942	0	-2	m	m
Exp V1 Meye Znoeye	4	19	female	Finished stimuli\pf_fear_jumbled_noeyes.jpg	pf	fear	no	no	1	362	0	-3	z	z
Exp V1 Meye Znoeye	4	19	female	Finished stimuli\sw_fear_upeyes.jpg	sw	fear	yes	yes	1	600	0	-3	m	m
Exp V1 Meye Znoeye	4	19	female	Finished stimuli\wf_fea_up_noeyes.jpg	wf	fear	yes	no	1	751	0	-3	z	z
Exp V1 Meye Znoeye	4	19	female	Finished stimuli\mo_hap_up_noeyes.jpg	mo	happy	yes	no	1	324	0	-3	z	z
Exp V1 Meye Znoeye	4	19	female	Finished stimuli\JJhappyupnoeyes.jpg	JJ	happy	yes	no	0	363	0	-3	z	m
Exp V1 Meye Znoeye	4	19	female	Finished stimuli\mo_hap_jumblednoeyes.jpg	mo	happy	no	no	0	512	0	-3	z	m
Exp V1 Meye Znoeye	4	19	female	Finished stimuli\em_fear_jumblednoeyes.jpg	em	fear	no	no	1	332	0	-3	z	z
Exp V1 Meye Znoeye	4	19	female	Finished stimuli\pefear_up_noeyes.jpg	pe	fear	yes	no	1	417	0	-3	z	z
Exp V1 Meye Znoeye	4	19	female	Finished stimuli\pefear_up_jumbled_noeyes.jpg	pe	fear	no	no	1	352	0	-3	z	z
Exp V1 Meye Znoeye	4	19	female	Finished stimuli\pehappy_noeyes.jpg	pe	happy	yes	no	1	543	0	-2	z	z
Exp V1 Meye Znoeye	4	19	female	Finished stimuli\pf_fear_up_noeyes.jpg	pf	fear	yes	no	1	523	0	-3	z	z
Exp V1 Meye Znoeye	4	19	female	Finished stimuli\sw_fear_jumbled_noeyes.jpg	sw	fear	no	no	1	660	0	-3	z	z
Exp V1 Meye Znoeye	4	19	female	Finished stimuli\pehappy_jumbled_no_eyes.jpg	pe	happy	no	no	0	401	0	-2	z	m
Exp V1 Meye Znoeye	4	19	female	Finished stimuli\cc_happy_upeyes.jpg	cc	happy	yes	yes	1	541	0	-3	m	m
Exp V1 Meye Znoeye	4	19	female	Finished stimuli\cc_happy_upnoeyes.jpg	cc	happy	yes	no	0	662	0	-3	z	m
Exp V1 Meye Znoeye	4	19	female	Finished stimuli\mf_happy_upeyes.jpg	mf	happy	yes	yes	1	418	0	-2	m	m
Exp V1 Meye Znoeye	4	19	female	Finished stimuli\sw_fear_noeyes.jpg	sw	fear	yes	no	1	509	0	-2	z	z
Exp V1 Meye Znoeye	4	19	female	Finished stimuli\em_fear_upeyes.jpg	em	fear	yes	yes	1	398	0	-2	m	m
Exp V1 Meye Znoeye	4	19	female	Finished stimuli\wf_fea_jumbled_noeyes.jpg	wf	fear	no	no	0	484	0	-3	z	m
Exp V1 Meye Znoeye	4	19	female	Finished stimuli\wf_hap_upeyes.jpg	wf	happy	yes	yes	0	459	0	-3	m	z
Exp V1 Meye Znoeye	4	19	female	Finished stimuli\pf_fear_jumbled_noeyes.jpg	pf	fear	no	no	1	534	0	-3	z	z
Exp V1 Meye Znoeye	4	19	female	Finished stimuli\jjfear_upeyes.jpg	jj	fear	yes	yes	1	387	0	-3	m	m
Exp V1 Meye Znoeye	4	19	female	Finished stimuli\wf_fea_up eyes.jpg	wf	fear	yes	yes	1	461	0	-3	m	m
Exp V1 Meye Znoeye	4	19	female	Finished stimuli\mf_happy_upno_eyes.jpg	mf	happy	yes	no	0	516	0	-3	z	m
Exp V1 Meye Znoeye	4	19	female	Finished stimuli\sw_hap_upeyes.jpg	sw	happy	yes	yes	1	593	0	-2	m	m
Exp V1 Meye Znoeye	4	19	female	Finished stimuli\wf_fea_jumbled_eyes.jpg	wf	fear	no	yes	1	443	0	-3	m	m
Exp V1 Meye Znoeye	4	19	female	Finished stimuli\pf_hap_up_noeye.jpg	pf	happy	yes	no	1	430	0	-3	z	z
Exp V1 Meye Znoeye	4	19	female	Finished stimuli\sw_hap_noeyes.jpg	sw	happy	yes	no	1	394	0	-2	z	z
Exp V1 Meye Znoeye	4	19	female	Finished stimuli\mo_fear_jumbledeyes.jpg	mo	fear	no	yes	1	384	0	-3	m	m
Exp V1 Meye Znoeye	4	19	female	Finished stimuli\wf_hap_upeyes.jpg	wf	happy	yes	yes	0	426	0	-3	m	z
Exp V1 Meye Znoeye	4	19	female	Finished stimuli\mo_hap_jumbledeyes.jpg	mo	happy	no	yes	1	381	0	-2	m	m
Exp V1 Meye Znoeye	4	19	female	Finished stimuli\em_fear_noeyes.jpg	em	fear	yes	no	1	635	0	-3	z	z
Exp V1 Meye Znoeye	4	19	female	Finished stimuli\pf_hap_upeye.jpg	pf	happy	yes	yes	1	525	0	-3	m	m
Exp V1 Meye Znoeye	4	19	female	Finished stimuli\em_hap_jumblednoeyes.jpg	em	happy	no	no	0	690	0	-2	z	m
Exp V1 Meye Znoeye	4	19	female	Finished stimuli\JJhappyjumblednoeyes.jpg	JJ	happy	no	yes	0	434	0	-3	m	z
Exp V1 Meye Znoeye	4	19	female	Finished stimuli\em_hap_jumbledeyes.jpg	em	happy	no	yes	0	502	0	-2	m	z
Exp V1 Meye Znoeye	4	19	female	Finished stimuli\jjfear_jumbledeyes.jpg	jj	fear	no	yes	1	827	0	-2	m	m
Exp V1 Meye Znoeye	4	19	female	Finished stimuli\cc_happy_jumblednoeyes.jpg	cc	happy	no	no	0	501	0	-2	z	m
Exp V1 Meye Znoeye	4	19	female	Finished stimuli\mf_happy_jumbledeyes.jpg	mf	happy	no	yes	1	638	0	-2	m	m
Exp V1 Meye Znoeye	4	19	female	Finished stimuli\JJhappyupeyes.jpg	JJ	happy	yes	yes	1	465	0	-3	m	m
Exp V1 Meye Znoeye	4	19	female	Finished stimuli\mo_fear_upnoeyes.jpg	mo	fear	yes	no	0	441	0	-2	m	z
Exp V1 Meye Znoeye	4	19	female	Finished stimuli\mf_fear_upeye.jpg	mf	fear	yes	yes	1	571	0	-3	m	m
Exp V1 Meye Znoeye	4	19	female	Finished stimuli\wf_hap_jumbled_noeyes.jpg	wf	happy	no	no	1	439	0	-3	z	z
Exp V1 Meye Znoeye	4	19	female	Finished stimuli\mf_fear_jumbledeye.jpg	mf	fear	no	yes	1	402	0	-3	m	m
Exp V1 Meye Znoeye	4	19	female	Finished stimuli\pf_hap_jumbled_noeye.jpg	pf	happy	no	no	0	408	0	-3	z	m
Exp V1 Meye Znoeye	4	19	female	Finished stimuli\pf_hap_jumbledeye.jpg	pf	happy	no	yes	1	423	0	-3	m	m
Exp V1 Meye Znoeye	4	19	female	Finished stimuli\cc_fear_jumbledeyes.jpg	cc	fear	no	yes	1	618	0	-2	m	m
Exp V1 Meye Znoeye	4	19	female	Finished stimuli\mo_fear_jumblednoeyes.jpg	mo	fear	no	no	1	559	0	-3	z	z
Exp V1 Meye Znoeye	4	19	female	Finished stimuli\wf_hap_jumbledeyes.jpg	wf	happy	no	yes	0	357	0	-3	z	m
Exp V1 Meye Znoeye	4	19	female	Finished stimuli\mo_hap_upeyes.jpg	mo	happy	yes	yes	1	643	0	-2	m	m
Exp V1 Meye Znoeye	4	19	female	Finished stimuli\pefear_upeyes.jpg	pe	fear	yes	yes	1	434	0	-2	m	m
Exp V1 Meye Znoeye	4	19	female	Finished stimuli\sw_fear_jumbled_eyes.jpg	sw	fear	no	yes	1	483	0	-3	m	m
Exp V1 Meye Znoeye	4	19	female	Finished stimuli\pehappy_upeyes.jpg	pe	happy	yes	yes	1	475	0	-3	m	m
Exp V1 Meye Znoeye	4	19	female	Finished stimuli\em_hap_upeyes.jpg	em	happy	yes	yes	0	408	0	-2	m	z
Exp V1 Meye Znoeye	4	19	female	Finished stimuli\rhap_noeyes.jpg	rh	happy	yes	no	0	366	0	-3	z	m
Exp V1 Meye Znoeye	4	19	female	Finished stimuli\rhap_jumbledeyes.jpg	rh	happy	no	yes	1	431	0	-3	m	m
Exp V1 Meye Znoeye	4	19	female	Finished stimuli\em_fear_jumbledeyes.jpg	em	fear	no	yes	1	554	0	-3	m	m
Exp V1 Meye Znoeye	4	19	female	Finished stimuli\pf_fear_jumbledeyes.jpg	pf	fear	no	yes	1	655	0	-3	m	m
Exp V1 Meye Znoeye	4	19	female	Finished stimuli\cc_fearjumbledno_eye.jpg	cc	fear	no	no	1	506	0	-3	z	z
Exp V1 Meye Znoeye	4	19	female	Finished stimuli\pehappy_jumbled_eyes.jpg	pe	happy	no	yes	1	587	0	-2	m	m
Exp V1 Meye Znoeye	4	19	female	Finished stimuli\mf_happy_jumbled_noeyes.jpg	mf	happy	no	no	1	368	0	-3	z	z
Exp V1 Meye Znoeye	4	19	female	Finished stimuli\cc_happy_jumbledeyes.jpg	cc	happy	no	yes	1	378	0	-2	m	m
Exp V1 Meye Znoeye	4	19	female	Finished stimuli\mf_fear_up_noeye.jpg	mf	fear	yes	no	1	393	0	-2	z	z
Exp V1 Meye Znoeye	4	19	female	Finished stimuli\pefear_up_jumbledeyes.jpg	pe	fear	no	yes	1	390	0	-3	m	m
Exp V1 Meye Znoeye	4	19	female	Finished stimuli\pf_fear_upeyes.jpg	pf	fear	yes	yes	1	388	0	-3	m	m
Exp V1 Meye Znoeye	4	19	female	Finished stimuli\cc_fear_noeyes.jpg	cc	fear	yes	no	0	498	0	-3	z	m
Exp V1 Meye Znoeye	4	19	female	Finished stimuli\sw_fear_upeyes.jpg	sw	fear	yes	yes	1	387	0	-2	m	m
Exp V1 Meye Znoeye	4	19	female	Finished stimuli\jjfear_jumblednoeyes.jpg	jj	fear	no	no	1	364	0	-3	z	z
Exp V1 Meye Znoeye	4	19	female	Finished stimuli\cc_fear_up.jpg	cc	fear	yes	yes	1	366	0	-2	m	m
Exp V1 Meye Znoeye	4	19	female	Finished stimuli\rhap.jpg	rh	happy	yes	yes	1	471	0	-3	m	m
Exp V1 Meye Znoeye	4	19	female	Finished stimuli\wf_hap_up_noeyes.jpg	wf	happy	yes	no	1	514	0	-3	m	m
Exp V1 Meye Znoeye	4	19	female	Finished stimuli\jjhap_jumbledeyes.jpg	jj	happy	no	yes	1	452	0	-2	m	m
Exp V1 Meye Znoeye	4	19	female	Finished stimuli\sw_hap_jumbled_noeyes.jpg	sw	happy	no	no	1	415	0	-2	z	z
Exp V1 Meye Znoeye	4	19	female	Finished stimuli\rfear_jumbledeyess.jpg	rf	fear	no	yes	1	365	0	-3	m	m
Exp V1 Meye Znoeye	4	19	female	Finished stimuli\em_hap_noeyes.jpg	em	happy	yes	no	0	394	0	-3	z	m
Exp V1 Meye Znoeye	4	19	female	Finished stimuli\mo_fear_upeyes.jpg	mo	fear	yes	yes	1	436	0	-3	m	m
Exp V1 Meye Znoeye	4	19	female	Finished stimuli\mf_fear_jumblednoeye.jpg	mf	fear	no	no	1	547	0	-3	z	z
Exp V1 Meye Znoeye	4	19	female	Finished stimuli\rfear_jumbled_noeyess.jpg	rf	fear	no	no	1	417	0	-2	z	z
Exp V1 Meye Znoeye	4	19	female	Finished stimuli\rhap_jumbled_noeyes.jpg	rh	happy	no	no	0	455	0	-3	z	m
Exp V1 Meye Znoeye	4	19	female	Finished stimuli\sw_hap_jumbledeyes.jpg	sw	happy	no	yes	1	427	0	-2	m	m
Exp V1 Meye Znoeye	4	19	female	Finished stimuli\jjfear_upnoeyes.jpg	jj	fear	yes	no	0	525	0	-3	z	m
Exp V1 Meye Znoeye	4	19	female	Finished stimuli\rfear_up_noeys.jpg	rf	fear	yes	no	0	433	0	-3	z	m
Exp V1 Meye Znoeye	4	19	female	Finished stimuli\rfear_upeys.jpg	rf	fear	yes	yes	1	488	0	-3	m	m
Exp V1 Meye Znoeye	4	19	female	Finished stimuli\wf_hap_up_noeyes.jpg	wf	happy	yes	no	1	444	0	-3	m	m
Exp V1 Meye Znoeye	4	19	female	Finished stimuli\cc_fear_up.jpg	cc	fear	yes	yes	1	386	0	-3	m	m
Exp V1 Meye Znoeye	4	19	female	Finished stimuli\rhap_noeyes.jpg	rh	happy	yes	no	0	480	0	-3	z	m
Exp V1 Meye Znoeye	4	19	female	Finished stimuli\cc_happy_upnoeyes.jpg	cc	happy	yes	no	1	348	0	-3	z	z
Exp V1 Meye Znoeye	4	19	female	Finished stimuli\wf_hap_jumbledeyes.jpg	wf	happy	no	yes	1	453	0	-3	z	z
Exp V1 Meye Znoeye	4	19	female	Finished stimuli\cc_fearjumbledno_eye.jpg	cc	fear	no	no	1	365	0	-2	z	z
Exp V1 Meye Znoeye	4	19	female	Finished stimuli\em_fear_noeyes.jpg	em	fear	yes	no	1	492	0	-2	z	z
Exp V1 Meye Znoeye	4	19	female	Finished stimuli\mo_fear_jumblednoeyes.jpg	mo	fear	no	no	1	503	0	-3	z	z
Exp V1 Meye Znoeye	4	19	female	Finished stimuli\mo_hap_jumbledeyes.jpg	mo	happy	no	yes	1	328	0	-3	m	m
Exp V1 Meye Znoeye	4	19	female	Finished stimuli\pehappy_jumbled_no_eyes.jpg	pe	happy	no	no	0	361	0	-2	z	m
Exp V1 Meye Znoeye	4	19	female	Finished stimuli\cc_happy_jumblednoeyes.jpg	cc	happy	no	no	0	375	0	-2	z	m
Exp V1 Meye Znoeye	4	19	female	Finished stimuli\mo_fear_upeyes.jpg	mo	fear	yes	yes	1	463	0	-3	m	m
Exp V1 Meye Znoeye	4	19	female	Finished stimuli\sw_hap_noeyes.jpg	sw	happy	yes	no	1	499	0	-2	z	z
Exp V1 Meye Znoeye	4	19	female	Finished stimuli\mo_hap_jumblednoeyes.jpg	mo	happy	no	no	1	480	0	-2	z	z
Exp V1 Meye Znoeye	4	19	female	Finished stimuli\em_hap_jumblednoeyes.jpg	em	happy	no	no	1	387	0	-2	z	z
Exp V1 Meye Znoeye	4	19	female	Finished stimuli\mf_fear_upeye.jpg	mf	fear	yes	yes	1	449	0	-3	m	m
Exp V1 Meye Znoeye	4	19	female	Finished stimuli\cc_fear_jumbledeyes.jpg	cc	fear	no	yes	1	373	0	-2	m	m
Exp V1 Meye Znoeye	4	19	female	Finished stimuli\pefear_upeyes.jpg	pe	fear	yes	yes	1	406	0	-3	m	m
Exp V1 Meye Znoeye	4	19	female	Finished stimuli\jjfear_jumblednoeyes.jpg	jj	fear	no	no	1	364	0	-3	z	z
Exp V1 Meye Znoeye	4	19	female	Finished stimuli\rfear_up_noeys.jpg	rf	fear	yes	no	1	567	0	-2	z	z
Exp V1 Meye Znoeye	4	19	female	Finished stimuli\rfear_jumbledeyess.jpg	rf	fear	no	yes	1	444	0	-3	m	m
Exp V1 Meye Znoeye	4	19	female	Finished stimuli\pefear_up_noeyes.jpg	pe	fear	yes	no	0	550	0	-3	z	m
Exp V1 Meye Znoeye	4	19	female	Finished stimuli\rhap_jumbled_noeyes.jpg	rh	happy	no	no	1	476	0	-2	z	z
Exp V1 Meye Znoeye	4	19	female	Finished stimuli\pefear_up_jumbled_noeyes.jpg	pe	fear	no	no	1	397	0	-2	z	z
Exp V1 Meye Znoeye	4	19	female	Finished stimuli\mo_fear_upnoeyes.jpg	mo	fear	yes	no	0	342	0	-3	m	z
Exp V1 Meye Znoeye	4	19	female	Finished stimuli\mo_hap_upeyes.jpg	mo	happy	yes	yes	1	379	0	-3	m	m
Exp V1 Meye Znoeye	4	19	female	Finished stimuli\mf_fear_jumbledeye.jpg	mf	fear	no	yes	1	295	0	-2	m	m
Exp V1 Meye Znoeye	4	19	female	Finished stimuli\wf_hap_jumbled_noeyes.jpg	wf	happy	no	no	1	390	0	-3	z	z
Exp V1 Meye Znoeye	4	19	female	Finished stimuli\pehappy_jumbled_eyes.jpg	pe	happy	no	yes	0	380	0	-3	m	z
Exp V1 Meye Znoeye	4	19	female	Finished stimuli\pefear_up_jumbledeyes.jpg	pe	fear	no	yes	1	398	0	-3	m	m
Exp V1 Meye Znoeye	4	19	female	Finished stimuli\wf_hap_upeyes.jpg	wf	happy	yes	yes	1	409	0	-3	m	m
Exp V1 Meye Znoeye	4	19	female	Finished stimuli\mf_happy_upno_eyes.jpg	mf	happy	yes	no	0	403	0	-2	z	m
Exp V1 Meye Znoeye	4	19	female	Finished stimuli\pf_fear_up_noeyes.jpg	pf	fear	yes	no	1	321	0	-3	z	z
Exp V1 Meye Znoeye	4	19	female	Finished stimuli\sw_fear_noeyes.jpg	sw	fear	yes	no	1	322	0	-2	z	z
Exp V1 Meye Znoeye	4	19	female	Finished stimuli\em_hap_jumbledeyes.jpg	em	happy	no	yes	1	531	0	-3	m	m
Exp V1 Meye Znoeye	4	19	female	Finished stimuli\rhap_jumbledeyes.jpg	rh	happy	no	yes	1	427	0	-3	m	m
Exp V1 Meye Znoeye	4	19	female	Finished stimuli\mf_happy_jumbled_noeyes.jpg	mf	happy	no	no	0	402	0	-3	z	m
Exp V1 Meye Znoeye	4	19	female	Finished stimuli\pehappy_noeyes.jpg	pe	happy	yes	no	0	397	0	-3	z	m
Exp V1 Meye Znoeye	4	19	female	Finished stimuli\cc_happy_upeyes.jpg	cc	happy	yes	yes	1	660	0	-2	m	m
Exp V1 Meye Znoeye	4	19	female	Finished stimuli\mf_fear_up_noeye.jpg	mf	fear	yes	no	1	527	0	-2	z	z
Exp V1 Meye Znoeye	4	19	female	Finished stimuli\em_fear_upeyes.jpg	em	fear	yes	yes	0	245	0	-2	m	z
Exp V1 Meye Znoeye	4	19	female	Finished stimuli\wf_hap_upeyes.jpg	wf	happy	yes	yes	0	382	0	-3	m	z
Exp V1 Meye Znoeye	4	19	female	Finished stimuli\jjfear_jumbledeyes.jpg	jj	fear	no	yes	1	324	0	-3	m	m
Exp V1 Meye Znoeye	4	19	female	Finished stimuli\pf_hap_up_noeye.jpg	pf	happy	yes	no	1	360	0	-3	z	z
Exp V1 Meye Znoeye	4	19	female	Finished stimuli\wf_fea_up_noeyes.jpg	wf	fear	yes	no	1	511	0	-2	z	z
Exp V1 Meye Znoeye	4	19	female	Finished stimuli\cc_happy_jumbledeyes.jpg	cc	happy	no	yes	1	224	0	-2	m	m
Exp V1 Meye Znoeye	4	19	female	Finished stimuli\pf_fear_upeyes.jpg	pf	fear	yes	yes	1	319	0	-2	m	m
Exp V1 Meye Znoeye	4	19	female	Finished stimuli\mf_happy_upeyes.jpg	mf	happy	yes	yes	1	583	0	-3	m	m
Exp V1 Meye Znoeye	4	19	female	Finished stimuli\pehappy_upeyes.jpg	pe	happy	yes	yes	1	585	0	-2	m	m
Exp V1 Meye Znoeye	4	19	female	Finished stimuli\sw_hap_upeyes.jpg	sw	happy	yes	yes	0	547	0	-3	m	z
Exp V1 Meye Znoeye	4	19	female	Finished stimuli\em_hap_upeyes.jpg	em	happy	yes	yes	0	396	0	-3	m	z
Exp V1 Meye Znoeye	4	19	female	Finished stimuli\pf_fear_jumbled_noeyes.jpg	pf	fear	no	no	0	333	0	-3	z	m
Exp V1 Meye Znoeye	4	19	female	Finished stimuli\em_fear_jumbledeyes.jpg	em	fear	no	yes	1	347	0	-2	m	m
Exp V1 Meye Znoeye	4	19	female	Finished stimuli\JJhappyupnoeyes.jpg	JJ	happy	yes	no	0	324	0	-3	z	m
Exp V1 Meye Znoeye	4	19	female	Finished stimuli\jjfear_upnoeyes.jpg	jj	fear	yes	no	1	512	0	-3	z	z
Exp V1 Meye Znoeye	4	19	female	Finished stimuli\pf_hap_jumbledeye.jpg	pf	happy	no	yes	1	317	0	-2	m	m
Exp V1 Meye Znoeye	4	19	female	Finished stimuli\pf_hap_jumbled_noeye.jpg	pf	happy	no	no	0	280	0	-3	z	m
Exp V1 Meye Znoeye	4	19	female	Finished stimuli\rfear_jumbled_noeyess.jpg	rf	fear	no	no	1	384	0	-3	z	z
Exp V1 Meye Znoeye	4	19	female	Finished stimuli\wf_fea_up eyes.jpg	wf	fear	yes	yes	1	334	0	-3	m	m
Exp V1 Meye Znoeye	4	19	female	Finished stimuli\sw_fear_jumbled_noeyes.jpg	sw	fear	no	no	0	379	0	-3	z	m
Exp V1 Meye Znoeye	4	19	female	Finished stimuli\sw_hap_jumbled_noeyes.jpg	sw	happy	no	no	0	418	0	-2	z	m
Exp V1 Meye Znoeye	4	19	female	Finished stimuli\sw_fear_upeyes.jpg	sw	fear	yes	yes	1	672	0	-2	m	m
Exp V1 Meye Znoeye	4	19	female	Finished stimuli\rfear_upeys.jpg	rf	fear	yes	yes	1	392	0	-2	m	m
Exp V1 Meye Znoeye	4	19	female	Finished stimuli\cc_fear_noeyes.jpg	cc	fear	yes	no	1	326	0	-3	z	z
Exp V1 Meye Znoeye	4	19	female	Finished stimuli\jjfear_upeyes.jpg	jj	fear	yes	yes	1	369	0	-3	m	m
Exp V1 Meye Znoeye	4	19	female	Finished stimuli\em_fear_jumblednoeyes.jpg	em	fear	no	no	1	368	0	-2	z	z
Exp V1 Meye Znoeye	4	19	female	Finished stimuli\JJhappyjumblednoeyes.jpg	JJ	happy	no	yes	0	461	0	-2	m	z
Exp V1 Meye Znoeye	4	19	female	Finished stimuli\rhap.jpg	rh	happy	yes	yes	1	508	0	-3	m	m
Exp V1 Meye Znoeye	4	19	female	Finished stimuli\wf_fea_jumbled_eyes.jpg	wf	fear	no	yes	1	441	0	-3	m	m
Exp V1 Meye Znoeye	4	19	female	Finished stimuli\em_hap_noeyes.jpg	em	happy	yes	no	1	612	0	-3	z	z
Exp V1 Meye Znoeye	4	19	female	Finished stimuli\JJhappyupeyes.jpg	JJ	happy	yes	yes	1	382	0	-2	m	m
Exp V1 Meye Znoeye	4	19	female	Finished stimuli\mo_fear_jumbledeyes.jpg	mo	fear	no	yes	1	452	0	-3	m	m
Exp V1 Meye Znoeye	4	19	female	Finished stimuli\pf_hap_upeye.jpg	pf	happy	yes	yes	1	556	0	-2	m	m
Exp V1 Meye Znoeye	4	19	female	Finished stimuli\mo_hap_up_noeyes.jpg	mo	happy	yes	no	1	376	0	-3	z	z
Exp V1 Meye Znoeye	4	19	female	Finished stimuli\mf_fear_jumblednoeye.jpg	mf	fear	no	no	1	478	0	-3	z	z
Exp V1 Meye Znoeye	4	19	female	Finished stimuli\sw_fear_jumbled_eyes.jpg	sw	fear	no	yes	1	350	0	-3	m	m
Exp V1 Meye Znoeye	4	19	female	Finished stimuli\mf_happy_jumbledeyes.jpg	mf	happy	no	yes	1	428	0	-3	m	m
Exp V1 Meye Znoeye	4	19	female	Finished stimuli\sw_hap_jumbledeyes.jpg	sw	happy	no	yes	1	447	0	-3	m	m
Exp V1 Meye Znoeye	4	19	female	Finished stimuli\jjhap_jumbledeyes.jpg	jj	happy	no	yes	1	454	0	-3	m	m
Exp V1 Meye Znoeye	4	19	female	Finished stimuli\pf_fear_jumbledeyes.jpg	pf	fear	no	yes	1	362	0	-2	m	m
Exp V1 Meye Znoeye	4	19	female	Finished stimuli\wf_fea_jumbled_noeyes.jpg	wf	fear	no	no	1	528	0	-2	z	z
Exp V1 Meye Znoeye	6	19	female	Finished stimuli\sw_hap_noeyes.jpg	sw	happy	yes	no	1	1101	16	0	z	z
Exp V1 Meye Znoeye	6	19	female	Finished stimuli\wf_hap_upeyes.jpg	wf	happy	yes	yes	1	807	16	0	m	m
Exp V1 Meye Znoeye	6	19	female	Finished stimuli\pefear_up_jumbled_noeyes.jpg	pe	fear	no	no	1	1123	15	0	z	z
Exp V1 Meye Znoeye	6	19	female	Finished stimuli\rhap_jumbled_noeyes.jpg	rh	happy	no	no	1	722	15	0	z	z
Exp V1 Meye Znoeye	6	19	female	Finished stimuli\mo_hap_jumbledeyes.jpg	mo	happy	no	yes	1	649	16	0	m	m
Exp V1 Meye Znoeye	6	19	female	Finished stimuli\wf_hap_jumbledeyes.jpg	wf	happy	no	yes	1	1270	15	0	z	z
Exp V1 Meye Znoeye	6	19	female	Finished stimuli\cc_fear_jumbledeyes.jpg	cc	fear	no	yes	1	805	16	1	m	m
Exp V1 Meye Znoeye	6	19	female	Finished stimuli\em_hap_upeyes.jpg	em	happy	yes	yes	1	1765	17	0	m	m
Exp V1 Meye Znoeye	6	19	female	Finished stimuli\jjfear_jumbledeyes.jpg	jj	fear	no	yes	1	610	17	1	m	m
Exp V1 Meye Znoeye	6	19	female	Finished stimuli\pf_hap_up_noeye.jpg	pf	happy	yes	no	0	2515	16	0	z	m
Exp V1 Meye Znoeye	6	19	female	Finished stimuli\cc_happy_upnoeyes.jpg	cc	happy	yes	no	1	1978	17	0	z	z
Exp V1 Meye Znoeye	6	19	female	Finished stimuli\sw_hap_upeyes.jpg	sw	happy	yes	yes	0	1047	17	1	m	z
Exp V1 Meye Znoeye	6	19	female	Finished stimuli\jjhap_jumbledeyes.jpg	jj	happy	no	yes	0	1521	16	0	m	z
Exp V1 Meye Znoeye	6	19	female	Finished stimuli\mf_happy_upno_eyes.jpg	mf	happy	yes	no	0	769	16	0	z	m
Exp V1 Meye Znoeye	6	19	female	Finished stimuli\wf_hap_up_noeyes.jpg	wf	happy	yes	no	1	1314	17	1	m	m
Exp V1 Meye Znoeye	6	19	female	Finished stimuli\mf_fear_up_noeye.jpg	mf	fear	yes	no	0	699	17	1	z	m
Exp V1 Meye Znoeye	6	19	female	Finished stimuli\mf_fear_jumblednoeye.jpg	mf	fear	no	no	1	1158	17	1	z	z
Exp V1 Meye Znoeye	6	19	female	Finished stimuli\pefear_upeyes.jpg	pe	fear	yes	yes	1	546	17	0	m	m
Exp V1 Meye Znoeye	6	19	female	Finished stimuli\pehappy_noeyes.jpg	pe	happy	yes	no	1	1650	16	0	z	z
Exp V1 Meye Znoeye	6	19	female	Finished stimuli\pf_hap_upeye.jpg	pf	happy	yes	yes	1	680	16	0	m	m
Exp V1 Meye Znoeye	6	19	female	Finished stimuli\mo_hap_jumblednoeyes.jpg	mo	happy	no	no	1	1064	17	1	z	z
Exp V1 Meye Znoeye	6	19	female	Finished stimuli\pf_fear_jumbled_noeyes.jpg	pf	fear	no	no	0	1249	16	0	z	m
Exp V1 Meye Znoeye	6	19	female	Finished stimuli\cc_fear_noeyes.jpg	cc	fear	yes	no	1	1676	17	0	z	z
Exp V1 Meye Znoeye	6	19	female	Finished stimuli\cc_happy_jumblednoeyes.jpg	cc	happy	no	no	1	1967	17	1	z	z
Exp V1 Meye Znoeye	6	19	female	Finished stimuli\mo_fear_upeyes.jpg	mo	fear	yes	yes	1	560	17	0	m	m
Exp V1 Meye Znoeye	6	19	female	Finished stimuli\rfear_jumbledeyess.jpg	rf	fear	no	yes	1	544	16	0	m	m
Exp V1 Meye Znoeye	6	19	female	Finished stimuli\sw_fear_jumbled_noeyes.jpg	sw	fear	no	no	0	853	16	0	z	m
Exp V1 Meye Znoeye	6	19	female	Finished stimuli\rhap.jpg	rh	happy	yes	yes	0	1300	17	1	m	z
Exp V1 Meye Znoeye	6	19	female	Finished stimuli\rfear_up_noeys.jpg	rf	fear	yes	no	0	998	16	0	z	m
Exp V1 Meye Znoeye	6	19	female	Finished stimuli\jjfear_upeyes.jpg	jj	fear	yes	yes	1	852	17	1	m	m
Exp V1 Meye Znoeye	6	19	female	Finished stimuli\mf_fear_jumbledeye.jpg	mf	fear	no	yes	1	486	16	0	m	m
Exp V1 Meye Znoeye	6	19	female	Finished stimuli\pehappy_jumbled_no_eyes.jpg	pe	happy	no	no	0	593	16	0	z	m
Exp V1 Meye Znoeye	6	19	female	Finished stimuli\pehappy_jumbled_eyes.jpg	pe	happy	no	yes	1	1160	17	1	m	m
Exp V1 Meye Znoeye	6	19	female	Finished stimuli\wf_fea_up eyes.jpg	wf	fear	yes	yes	1	707	16	0	m	m
Exp V1 Meye Znoeye	6	19	female	Finished stimuli\pf_hap_jumbled_noeye.jpg	pf	happy	no	no	0	2761	17	0	z	m
Exp V1 Meye Znoeye	6	19	female	Finished stimuli\pefear_up_jumbledeyes.jpg	pe	fear	no	yes	0	1621	16	0	m	z
Exp V1 Meye Znoeye	6	19	female	Finished stimuli\em_fear_noeyes.jpg	em	fear	yes	no	1	1583	17	0	z	z
Exp V1 Meye Znoeye	6	19	female	Finished stimuli\em_fear_jumblednoeyes.jpg	em	fear	no	no	0	680	16	0	z	m
Exp V1 Meye Znoeye	6	19	female	Finished stimuli\mo_fear_jumblednoeyes.jpg	mo	fear	no	no	0	1291	16	0	z	m
Exp V1 Meye Znoeye	6	19	female	Finished stimuli\sw_fear_jumbled_eyes.jpg	sw	fear	no	yes	1	766	16	0	m	m
Exp V1 Meye Znoeye	6	19	female	Finished stimuli\pefear_up_noeyes.jpg	pe	fear	yes	no	1	1079	16	0	z	z
Exp V1 Meye Znoeye	6	19	female	Finished stimuli\sw_hap_jumbledeyes.jpg	sw	happy	no	yes	1	1150	17	0	m	m
Exp V1 Meye Znoeye	6	19	female	Finished stimuli\JJhappyupnoeyes.jpg	JJ	happy	yes	no	0	726	17	0	z	m
Exp V1 Meye Znoeye	6	19	female	Finished stimuli\jjfear_jumblednoeyes.jpg	jj	fear	no	no	0	1290	16	0	z	m
Exp V1 Meye Znoeye	6	19	female	Finished stimuli\wf_hap_upeyes.jpg	wf	happy	yes	yes	1	2057	16	0	m	m
Exp V1 Meye Znoeye	6	19	female	Finished stimuli\cc_happy_upeyes.jpg	cc	happy	yes	yes	1	1500	17	1	m	m
Exp V1 Meye Znoeye	6	19	female	Finished stimuli\sw_hap_jumbled_noeyes.jpg	sw	happy	no	no	0	1122	16	0	z	m
Exp V1 Meye Znoeye	6	19	female	Finished stimuli\rfear_jumbled_noeyess.jpg	rf	fear	no	no	0	1859	17	0	z	m
Exp V1 Meye Znoeye	6	19	female	Finished stimuli\wf_fea_jumbled_noeyes.jpg	wf	fear	no	no	0	696	16	0	z	m
Exp V1 Meye Znoeye	6	19	female	Finished stimuli\cc_happy_jumbledeyes.jpg	cc	happy	no	yes	1	505	16	0	m	m
Exp V1 Meye Znoeye	6	19	female	Finished stimuli\mo_hap_up_noeyes.jpg	mo	happy	yes	no	0	617	17	1	z	m
Exp V1 Meye Znoeye	6	19	female	Finished stimuli\pf_fear_upeyes.jpg	pf	fear	yes	yes	0	2346	16	0	m	z
Exp V1 Meye Znoeye	6	19	female	Finished stimuli\rfear_upeys.jpg	rf	fear	yes	yes	1	550	16	0	m	m
Exp V1 Meye Znoeye	6	19	female	Finished stimuli\mo_fear_jumbledeyes.jpg	mo	fear	no	yes	1	806	16	0	m	m
Exp V1 Meye Znoeye	6	19	female	Finished stimuli\cc_fearjumbledno_eye.jpg	cc	fear	no	no	0	520	17	1	z	m
Exp V1 Meye Znoeye	6	19	female	Finished stimuli\rhap_jumbledeyes.jpg	rh	happy	no	yes	1	1099	16	0	m	m
Exp V1 Meye Znoeye	6	19	female	Finished stimuli\JJhappyjumblednoeyes.jpg	JJ	happy	no	yes	0	2539	16	0	m	z
Exp V1 Meye Znoeye	6	19	female	Finished stimuli\em_hap_noeyes.jpg	em	happy	yes	no	0	770	16	0	z	m
Exp V1 Meye Znoeye	6	19	female	Finished stimuli\wf_fea_jumbled_eyes.jpg	wf	fear	no	yes	1	2107	17	0	m	m
Exp V1 Meye Znoeye	6	19	female	Finished stimuli\mf_happy_upeyes.jpg	mf	happy	yes	yes	1	606	16	0	m	m
Exp V1 Meye Znoeye	6	19	female	Finished stimuli\wf_hap_jumbled_noeyes.jpg	wf	happy	no	no	0	439	16	0	z	m
Exp V1 Meye Znoeye	6	19	female	Finished stimuli\mo_hap_upeyes.jpg	mo	happy	yes	yes	1	1183	17	1	m	m
Exp V1 Meye Znoeye	6	19	female	Finished stimuli\pf_hap_jumbledeye.jpg	pf	happy	no	yes	0	2104	17	1	m	z
Exp V1 Meye Znoeye	6	19	female	Finished stimuli\wf_fea_up_noeyes.jpg	wf	fear	yes	no	0	426	16	0	z	m
Exp V1 Meye Znoeye	6	19	female	Finished stimuli\cc_fear_up.jpg	cc	fear	yes	yes	1	341	17	1	m	m
Exp V1 Meye Znoeye	6	19	female	Finished stimuli\mo_fear_upnoeyes.jpg	mo	fear	yes	no	1	456	16	0	m	m
Exp V1 Meye Znoeye	6	19	female	Finished stimuli\em_fear_upeyes.jpg	em	fear	yes	yes	1	471	17	1	m	m
Exp V1 Meye Znoeye	6	19	female	Finished stimuli\pf_fear_jumbledeyes.jpg	pf	fear	no	yes	1	468	17	1	m	m
Exp V1 Meye Znoeye	6	19	female	Finished stimuli\em_fear_jumbledeyes.jpg	em	fear	no	yes	1	766	17	0	m	m
Exp V1 Meye Znoeye	6	19	female	Finished stimuli\pf_fear_up_noeyes.jpg	pf	fear	yes	no	0	2083	16	0	z	m
Exp V1 Meye Znoeye	6	19	female	Finished stimuli\JJhappyupeyes.jpg	JJ	happy	yes	yes	1	562	17	0	m	m
Exp V1 Meye Znoeye	6	19	female	Finished stimuli\sw_fear_noeyes.jpg	sw	fear	yes	no	1	762	17	0	z	z
Exp V1 Meye Znoeye	6	19	female	Finished stimuli\em_hap_jumbledeyes.jpg	em	happy	no	yes	1	483	16	23	m	m
Exp V1 Meye Znoeye	6	19	female	Finished stimuli\em_hap_jumblednoeyes.jpg	em	happy	no	no	0	782	16	0	z	m
Exp V1 Meye Znoeye	6	19	female	Finished stimuli\mf_happy_jumbled_noeyes.jpg	mf	happy	no	no	1	2125	17	1	z	z
Exp V1 Meye Znoeye	6	19	female	Finished stimuli\sw_fear_upeyes.jpg	sw	fear	yes	yes	1	595	17	0	m	m
Exp V1 Meye Znoeye	6	19	female	Finished stimuli\mf_happy_jumbledeyes.jpg	mf	happy	no	yes	0	632	16	0	m	z
Exp V1 Meye Znoeye	6	19	female	Finished stimuli\pehappy_upeyes.jpg	pe	happy	yes	yes	1	467	17	1	m	m
Exp V1 Meye Znoeye	6	19	female	Finished stimuli\mf_fear_upeye.jpg	mf	fear	yes	yes	1	643	17	1	m	m
Exp V1 Meye Znoeye	6	19	female	Finished stimuli\rhap_noeyes.jpg	rh	happy	yes	no	0	411	17	0	z	m
Exp V1 Meye Znoeye	6	19	female	Finished stimuli\jjfear_upnoeyes.jpg	jj	fear	yes	no	0	504	16	0	z	m
Exp V1 Meye Znoeye	6	19	female	Finished stimuli\sw_hap_noeyes.jpg	sw	happy	yes	no	0	483	16	0	z	m
Exp V1 Meye Znoeye	6	19	female	Finished stimuli\pf_hap_upeye.jpg	pf	happy	yes	yes	1	2042	16	0	m	m
Exp V1 Meye Znoeye	6	19	female	Finished stimuli\sw_hap_upeyes.jpg	sw	happy	yes	yes	1	699	16	0	m	m
Exp V1 Meye Znoeye	6	19	female	Finished stimuli\wf_hap_up_noeyes.jpg	wf	happy	yes	no	1	1199	17	1	m	m
Exp V1 Meye Znoeye	6	19	female	Finished stimuli\pehappy_noeyes.jpg	pe	happy	yes	no	0	1560	17	0	z	m
Exp V1 Meye Znoeye	6	19	female	Finished stimuli\cc_happy_upnoeyes.jpg	cc	happy	yes	no	0	1136	16	0	z	m
Exp V1 Meye Znoeye	6	19	female	Finished stimuli\JJhappyjumblednoeyes.jpg	JJ	happy	no	yes	0	1348	16	0	m	z
Exp V1 Meye Znoeye	6	19	female	Finished stimuli\mo_hap_jumblednoeyes.jpg	mo	happy	no	no	0	909	17	1	z	m
Exp V1 Meye Znoeye	6	19	female	Finished stimuli\mf_happy_jumbledeyes.jpg	mf	happy	no	yes	0	2429	17	1	m	z
Exp V1 Meye Znoeye	6	19	female	Finished stimuli\rfear_up_noeys.jpg	rf	fear	yes	no	0	422	16	0	z	m
Exp V1 Meye Znoeye	6	19	female	Finished stimuli\mf_fear_jumbledeye.jpg	mf	fear	no	yes	1	912	16	0	m	m
Exp V1 Meye Znoeye	6	19	female	Finished stimuli\cc_happy_jumblednoeyes.jpg	cc	happy	no	no	0	456	17	0	z	m
Exp V1 Meye Znoeye	6	19	female	Finished stimuli\jjfear_upeyes.jpg	jj	fear	yes	yes	1	530	16	0	m	m
Exp V1 Meye Znoeye	6	19	female	Finished stimuli\pefear_upeyes.jpg	pe	fear	yes	yes	1	690	16	0	m	m
Exp V1 Meye Znoeye	6	19	female	Finished stimuli\mf_fear_upeye.jpg	mf	fear	yes	yes	1	574	17	1	m	m
Exp V1 Meye Znoeye	6	19	female	Finished stimuli\pf_fear_upeyes.jpg	pf	fear	yes	yes	1	375	17	1	m	m
Exp V1 Meye Znoeye	6	19	female	Finished stimuli\wf_hap_jumbled_noeyes.jpg	wf	happy	no	no	1	1037	17	1	z	z
Exp V1 Meye Znoeye	6	19	female	Finished stimuli\jjhap_jumbledeyes.jpg	jj	happy	no	yes	1	522	16	0	m	m
Exp V1 Meye Znoeye	6	19	female	Finished stimuli\mo_fear_jumblednoeyes.jpg	mo	fear	no	no	1	1183	17	1	z	z
Exp V1 Meye Znoeye	6	19	female	Finished stimuli\wf_fea_up_noeyes.jpg	wf	fear	yes	no	0	563	17	1	z	m
Exp V1 Meye Znoeye	6	19	female	Finished stimuli\wf_hap_upeyes.jpg	wf	happy	yes	yes	1	895	17	0	m	m
Exp V1 Meye Znoeye	6	19	female	Finished stimuli\JJhappyupnoeyes.jpg	JJ	happy	yes	no	0	1002	17	0	z	m
Exp V1 Meye Znoeye	6	19	female	Finished stimuli\pf_hap_jumbled_noeye.jpg	pf	happy	no	no	0	470	16	0	z	m
Exp V1 Meye Znoeye	6	19	female	Finished stimuli\mo_fear_upeyes.jpg	mo	fear	yes	yes	1	821	17	0	m	m
Exp V1 Meye Znoeye	6	19	female	Finished stimuli\mf_fear_jumblednoeye.jpg	mf	fear	no	no	1	803	17	0	z	z
Exp V1 Meye Znoeye	6	19	female	Finished stimuli\cc_happy_jumbledeyes.jpg	cc	happy	no	yes	1	400	16	0	m	m
Exp V1 Meye Znoeye	6	19	female	Finished stimuli\pf_fear_jumbled_noeyes.jpg	pf	fear	no	no	1	898	17	1	z	z
Exp V1 Meye Znoeye	6	19	female	Finished stimuli\mo_hap_up_noeyes.jpg	mo	happy	yes	no	1	1457	17	0	z	z
Exp V1 Meye Znoeye	6	19	female	Finished stimuli\wf_fea_jumbled_eyes.jpg	wf	fear	no	yes	0	1215	17	0	m	z
Exp V1 Meye Znoeye	6	19	female	Finished stimuli\JJhappyupeyes.jpg	JJ	happy	yes	yes	1	605	17	0	m	m
Exp V1 Meye Znoeye	6	19	female	Finished stimuli\mo_fear_upnoeyes.jpg	mo	fear	yes	no	1	678	16	0	m	m
Exp V1 Meye Znoeye	6	19	female	Finished stimuli\mf_happy_upno_eyes.jpg	mf	happy	yes	no	1	1438	17	1	z	z
Exp V1 Meye Znoeye	6	19	female	Finished stimuli\em_fear_upeyes.jpg	em	fear	yes	yes	1	712	18	0	m	m
Exp V1 Meye Znoeye	6	19	female	Finished stimuli\jjfear_jumblednoeyes.jpg	jj	fear	no	no	0	891	16	0	z	m
Exp V1 Meye Znoeye	6	19	female	Finished stimuli\pf_fear_jumbledeyes.jpg	pf	fear	no	yes	1	1750	17	0	m	m
Exp V1 Meye Znoeye	6	19	female	Finished stimuli\pehappy_jumbled_eyes.jpg	pe	happy	no	yes	1	659	16	-1	m	m
Exp V1 Meye Znoeye	6	19	female	Finished stimuli\wf_hap_upeyes.jpg	wf	happy	yes	yes	1	1181	16	0	m	m
Exp V1 Meye Znoeye	6	19	female	Finished stimuli\em_hap_upeyes.jpg	em	happy	yes	yes	0	986	17	0	m	z
Exp V1 Meye Znoeye	6	19	female	Finished stimuli\em_hap_jumbledeyes.jpg	em	happy	no	yes	0	755	16	0	m	z
Exp V1 Meye Znoeye	6	19	female	Finished stimuli\rhap.jpg	rh	happy	yes	yes	1	828	16	0	m	m
Exp V1 Meye Znoeye	6	19	female	Finished stimuli\sw_fear_noeyes.jpg	sw	fear	yes	no	1	1729	16	0	z	z
Exp V1 Meye Znoeye	6	19	female	Finished stimuli\rhap_noeyes.jpg	rh	happy	yes	no	0	374	17	1	z	m
Exp V1 Meye Znoeye	6	19	female	Finished stimuli\em_hap_noeyes.jpg	em	happy	yes	no	0	499	16	0	z	m
Exp V1 Meye Znoeye	6	19	female	Finished stimuli\pf_hap_up_noeye.jpg	pf	happy	yes	no	1	750	17	0	z	z
Exp V1 Meye Znoeye	6	19	female	Finished stimuli\sw_hap_jumbled_noeyes.jpg	sw	happy	no	no	1	1143	17	1	z	z
Exp V1 Meye Znoeye	6	19	female	Finished stimuli\em_fear_jumbledeyes.jpg	em	fear	no	yes	1	699	16	0	m	m
Exp V1 Meye Znoeye	6	19	female	Finished stimuli\pehappy_jumbled_no_eyes.jpg	pe	happy	no	no	0	562	16	0	z	m
Exp V1 Meye Znoeye	6	19	female	Finished stimuli\cc_happy_upeyes.jpg	cc	happy	yes	yes	0	835	17	1	m	z
Exp V1 Meye Znoeye	6	19	female	Finished stimuli\pefear_up_jumbledeyes.jpg	pe	fear	no	yes	0	537	17	0	m	z
Exp V1 Meye Znoeye	6	19	female	Finished stimuli\rfear_upeys.jpg	rf	fear	yes	yes	1	629	17	1	m	m
Exp V1 Meye Znoeye	6	19	female	Finished stimuli\sw_hap_jumbledeyes.jpg	sw	happy	no	yes	1	532	17	1	m	m
Exp V1 Meye Znoeye	6	19	female	Finished stimuli\jjfear_upnoeyes.jpg	jj	fear	yes	no	0	1399	17	1	z	m
Exp V1 Meye Znoeye	6	19	female	Finished stimuli\jjfear_jumbledeyes.jpg	jj	fear	no	yes	0	968	17	0	m	z
Exp V1 Meye Znoeye	6	19	female	Finished stimuli\cc_fear_noeyes.jpg	cc	fear	yes	no	1	788	16	0	z	z
Exp V1 Meye Znoeye	6	19	female	Finished stimuli\pehappy_upeyes.jpg	pe	happy	yes	yes	1	489	17	0	m	m
Exp V1 Meye Znoeye	6	19	female	Finished stimuli\sw_fear_jumbled_noeyes.jpg	sw	fear	no	no	1	1428	16	0	z	z
Exp V1 Meye Znoeye	6	19	female	Finished stimuli\wf_hap_jumbledeyes.jpg	wf	happy	no	yes	1	916	17	1	z	z
Exp V1 Meye Znoeye	6	19	female	Finished stimuli\mf_happy_upeyes.jpg	mf	happy	yes	yes	1	427	17	0	m	m
Exp V1 Meye Znoeye	6	19	female	Finished stimuli\pf_hap_jumbledeye.jpg	pf	happy	no	yes	0	849	16	0	m	z
Exp V1 Meye Znoeye	6	19	female	Finished stimuli\mo_hap_jumbledeyes.jpg	mo	happy	no	yes	0	735	17	0	m	z
Exp V1 Meye Znoeye	6	19	female	Finished stimuli\cc_fear_up.jpg	cc	fear	yes	yes	0	1184	17	1	m	z
Exp V1 Meye Znoeye	6	19	female	Finished stimuli\cc_fearjumbledno_eye.jpg	cc	fear	no	no	0	425	17	1	z	m
Exp V1 Meye Znoeye	6	19	female	Finished stimuli\rhap_jumbled_noeyes.jpg	rh	happy	no	no	0	1066	17	1	z	m
Exp V1 Meye Znoeye	6	19	female	Finished stimuli\rfear_jumbledeyess.jpg	rf	fear	no	yes	1	632	16	0	m	m
Exp V1 Meye Znoeye	6	19	female	Finished stimuli\wf_fea_up eyes.jpg	wf	fear	yes	yes	1	446	17	0	m	m
Exp V1 Meye Znoeye	6	19	female	Finished stimuli\cc_fear_jumbledeyes.jpg	cc	fear	no	yes	1	387	17	0	m	m
Exp V1 Meye Znoeye	6	19	female	Finished stimuli\rfear_jumbled_noeyess.jpg	rf	fear	no	no	1	696	16	0	z	z
Exp V1 Meye Znoeye	6	19	female	Finished stimuli\pefear_up_jumbled_noeyes.jpg	pe	fear	no	no	0	791	16	0	z	m
Exp V1 Meye Znoeye	6	19	female	Finished stimuli\mf_fear_up_noeye.jpg	mf	fear	yes	no	1	473	17	0	z	z
Exp V1 Meye Znoeye	6	19	female	Finished stimuli\mf_happy_jumbled_noeyes.jpg	mf	happy	no	no	0	600	16	0	z	m
Exp V1 Meye Znoeye	6	19	female	Finished stimuli\rhap_jumbledeyes.jpg	rh	happy	no	yes	0	1154	17	0	m	z
Exp V1 Meye Znoeye	6	19	female	Finished stimuli\em_fear_jumblednoeyes.jpg	em	fear	no	no	1	766	16	0	z	z
Exp V1 Meye Znoeye	6	19	female	Finished stimuli\sw_fear_jumbled_eyes.jpg	sw	fear	no	yes	0	540	16	0	m	z
Exp V1 Meye Znoeye	6	19	female	Finished stimuli\mo_fear_jumbledeyes.jpg	mo	fear	no	yes	1	508	16	0	m	m
Exp V1 Meye Znoeye	6	19	female	Finished stimuli\em_fear_noeyes.jpg	em	fear	yes	no	1	485	17	1	z	z
Exp V1 Meye Znoeye	6	19	female	Finished stimuli\wf_fea_jumbled_noeyes.jpg	wf	fear	no	no	1	983	17	0	z	z
Exp V1 Meye Znoeye	6	19	female	Finished stimuli\em_hap_jumblednoeyes.jpg	em	happy	no	no	1	1168	17	0	z	z
Exp V1 Meye Znoeye	6	19	female	Finished stimuli\mo_hap_upeyes.jpg	mo	happy	yes	yes	1	511	17	0	m	m
Exp V1 Meye Znoeye	6	19	female	Finished stimuli\sw_fear_upeyes.jpg	sw	fear	yes	yes	1	491	17	0	m	m
Exp V1 Meye Znoeye	6	19	female	Finished stimuli\pf_fear_up_noeyes.jpg	pf	fear	yes	no	0	1195	17	1	z	m
Exp V1 Meye Znoeye	6	19	female	Finished stimuli\pefear_up_noeyes.jpg	pe	fear	yes	no	0	1341	16	0	z	m
Exp V1 Meye Znoeye	6	19	female	Finished stimuli\wf_hap_upeyes.jpg	wf	happy	yes	yes	1	1886	17	0	m	m
Exp V1 Meye Znoeye	6	19	female	Finished stimuli\pefear_up_noeyes.jpg	pe	fear	yes	no	0	898	17	1	z	m
Exp V1 Meye Znoeye	6	19	female	Finished stimuli\cc_fear_noeyes.jpg	cc	fear	yes	no	1	913	17	0	z	z
Exp V1 Meye Znoeye	6	19	female	Finished stimuli\wf_hap_jumbledeyes.jpg	wf	happy	no	yes	1	716	16	0	z	z
Exp V1 Meye Znoeye	6	19	female	Finished stimuli\mf_fear_jumbledeye.jpg	mf	fear	no	yes	0	1731	17	0	m	z
Exp V1 Meye Znoeye	6	19	female	Finished stimuli\pefear_up_jumbledeyes.jpg	pe	fear	no	yes	0	751	17	1	m	z
Exp V1 Meye Znoeye	6	19	female	Finished stimuli\mf_happy_jumbled_noeyes.jpg	mf	happy	no	no	0	632	17	1	z	m
Exp V1 Meye Znoeye	6	19	female	Finished stimuli\sw_fear_jumbled_eyes.jpg	sw	fear	no	yes	0	1586	17	1	m	z
Exp V1 Meye Znoeye	6	19	female	Finished stimuli\wf_fea_jumbled_noeyes.jpg	wf	fear	no	no	1	1298	16	0	z	z
Exp V1 Meye Znoeye	6	19	female	Finished stimuli\mf_happy_jumbledeyes.jpg	mf	happy	no	yes	0	486	17	1	m	z
Exp V1 Meye Znoeye	6	19	female	Finished stimuli\pf_hap_jumbledeye.jpg	pf	happy	no	yes	1	653	17	1	m	m
Exp V1 Meye Znoeye	6	19	female	Finished stimuli\pf_fear_up_noeyes.jpg	pf	fear	yes	no	0	1759	16	0	z	m
Exp V1 Meye Znoeye	6	19	female	Finished stimuli\em_fear_noeyes.jpg	em	fear	yes	no	1	1224	16	0	z	z
Exp V1 Meye Znoeye	6	19	female	Finished stimuli\sw_hap_upeyes.jpg	sw	happy	yes	yes	1	754	16	0	m	m
Exp V1 Meye Znoeye	6	19	female	Finished stimuli\pf_hap_jumbled_noeye.jpg	pf	happy	no	no	0	642	16	0	z	m
Exp V1 Meye Znoeye	6	19	female	Finished stimuli\JJhappyjumblednoeyes.jpg	JJ	happy	no	yes	0	488	17	0	m	z
Exp V1 Meye Znoeye	6	19	female	Finished stimuli\mf_fear_jumblednoeye.jpg	mf	fear	no	no	1	531	16	0	z	z
Exp V1 Meye Znoeye	6	19	female	Finished stimuli\pf_hap_up_noeye.jpg	pf	happy	yes	no	1	352	16	0	z	z
Exp V1 Meye Znoeye	6	19	female	Finished stimuli\pehappy_noeyes.jpg	pe	happy	yes	no	0	1404	17	0	z	m
Exp V1 Meye Znoeye	6	19	female	Finished stimuli\pf_fear_upeyes.jpg	pf	fear	yes	yes	1	738	16	0	m	m
Exp V1 Meye Znoeye	6	19	female	Finished stimuli\mf_happy_upeyes.jpg	mf	happy	yes	yes	1	864	17	0	m	m
Exp V1 Meye Znoeye	6	19	female	Finished stimuli\mo_fear_upeyes.jpg	mo	fear	yes	yes	1	484	16	0	m	m
Exp V1 Meye Znoeye	6	19	female	Finished stimuli\rhap_jumbledeyes.jpg	rh	happy	no	yes	1	779	17	0	m	m
Exp V1 Meye Znoeye	6	19	female	Finished stimuli\sw_hap_noeyes.jpg	sw	happy	yes	no	0	796	17	1	z	m
Exp V1 Meye Znoeye	6	19	female	Finished stimuli\rhap.jpg	rh	happy	yes	yes	0	493	17	0	m	z
Exp V1 Meye Znoeye	6	19	female	Finished stimuli\em_fear_upeyes.jpg	em	fear	yes	yes	1	404	17	1	m	m
Exp V1 Meye Znoeye	6	19	female	Finished stimuli\mo_hap_jumbledeyes.jpg	mo	happy	no	yes	1	896	16	0	m	m
Exp V1 Meye Znoeye	6	19	female	Finished stimuli\wf_hap_upeyes.jpg	wf	happy	yes	yes	0	427	16	0	m	z
Exp V1 Meye Znoeye	6	19	female	Finished stimuli\cc_happy_jumblednoeyes.jpg	cc	happy	no	no	1	1721	17	0	z	z
Exp V1 Meye Znoeye	6	19	female	Finished stimuli\em_fear_jumbledeyes.jpg	em	fear	no	yes	1	1130	17	0	m	m
Exp V1 Meye Znoeye	6	19	female	Finished stimuli\mo_hap_upeyes.jpg	mo	happy	yes	yes	1	611	17	1	m	m
Exp V1 Meye Znoeye	6	19	female	Finished stimuli\mo_fear_upnoeyes.jpg	mo	fear	yes	no	1	915	16	0	m	m
Exp V1 Meye Znoeye	6	19	female	Finished stimuli\jjfear_jumblednoeyes.jpg	jj	fear	no	no	0	891	17	0	z	m
Exp V1 Meye Znoeye	6	19	female	Finished stimuli\pehappy_jumbled_eyes.jpg	pe	happy	no	yes	1	362	16	0	m	m
Exp V1 Meye Znoeye	6	19	female	Finished stimuli\sw_hap_jumbledeyes.jpg	sw	happy	no	yes	1	542	16	0	m	m
Exp V1 Meye Znoeye	6	19	female	Finished stimuli\mf_happy_upno_eyes.jpg	mf	happy	yes	no	1	623	17	0	z	z
Exp V1 Meye Znoeye	6	19	female	Finished stimuli\rfear_jumbled_noeyess.jpg	rf	fear	no	no	0	1418	17	1	z	m
Exp V1 Meye Znoeye	6	19	female	Finished stimuli\cc_fear_jumbledeyes.jpg	cc	fear	no	yes	1	443	17	1	m	m
Exp V1 Meye Znoeye	6	19	female	Finished stimuli\jjfear_jumbledeyes.jpg	jj	fear	no	yes	1	594	17	0	m	m
Exp V1 Meye Znoeye	6	19	female	Finished stimuli\mo_hap_up_noeyes.jpg	mo	happy	yes	no	0	806	16	0	z	m
Exp V1 Meye Znoeye	6	19	female	Finished stimuli\em_hap_upeyes.jpg	em	happy	yes	yes	0	419	17	0	m	z
Exp V1 Meye Znoeye	6	19	female	Finished stimuli\mo_fear_jumbledeyes.jpg	mo	fear	no	yes	1	537	17	1	m	m
Exp V1 Meye Znoeye	6	19	female	Finished stimuli\mo_fear_jumblednoeyes.jpg	mo	fear	no	no	0	737	17	0	z	m
Exp V1 Meye Znoeye	6	19	female	Finished stimuli\pehappy_jumbled_no_eyes.jpg	pe	happy	no	no	0	632	16	0	z	m
Exp V1 Meye Znoeye	6	19	female	Finished stimuli\pf_hap_upeye.jpg	pf	happy	yes	yes	1	1957	16	0	m	m
Exp V1 Meye Znoeye	6	19	female	Finished stimuli\cc_fear_up.jpg	cc	fear	yes	yes	1	717	17	0	m	m
Exp V1 Meye Znoeye	6	19	female	Finished stimuli\pf_fear_jumbledeyes.jpg	pf	fear	no	yes	1	3095	16	0	m	m
Exp V1 Meye Znoeye	6	19	female	Finished stimuli\wf_fea_jumbled_eyes.jpg	wf	fear	no	yes	0	3370	16	0	m	z
Exp V1 Meye Znoeye	6	19	female	Finished stimuli\em_hap_noeyes.jpg	em	happy	yes	no	0	395	16	0	z	m
Exp V1 Meye Znoeye	6	19	female	Finished stimuli\cc_happy_upeyes.jpg	cc	happy	yes	yes	0	456	17	0	m	z
Exp V1 Meye Znoeye	6	19	female	Finished stimuli\rhap_noeyes.jpg	rh	happy	yes	no	0	366	16	0	z	m
Exp V1 Meye Znoeye	6	19	female	Finished stimuli\mf_fear_upeye.jpg	mf	fear	yes	yes	1	659	17	0	m	m
Exp V1 Meye Znoeye	6	19	female	Finished stimuli\mf_fear_up_noeye.jpg	mf	fear	yes	no	0	418	17	0	z	m
Exp V1 Meye Znoeye	6	19	female	Finished stimuli\sw_fear_jumbled_noeyes.jpg	sw	fear	no	no	0	656	17	1	z	m
Exp V1 Meye Znoeye	6	19	female	Finished stimuli\JJhappyupnoeyes.jpg	JJ	happy	yes	no	0	474	16	0	z	m
Exp V1 Meye Znoeye	6	19	female	Finished stimuli\cc_happy_upnoeyes.jpg	cc	happy	yes	no	0	866	16	0	z	m
Exp V1 Meye Znoeye	6	19	female	Finished stimuli\cc_fearjumbledno_eye.jpg	cc	fear	no	no	1	408	17	0	z	z
Exp V1 Meye Znoeye	6	19	female	Finished stimuli\sw_fear_noeyes.jpg	sw	fear	yes	no	1	637	16	0	z	z
Exp V1 Meye Znoeye	6	19	female	Finished stimuli\rfear_up_noeys.jpg	rf	fear	yes	no	0	623	16	0	z	m
Exp V1 Meye Znoeye	6	19	female	Finished stimuli\rhap_jumbled_noeyes.jpg	rh	happy	no	no	0	1101	17	0	z	m
Exp V1 Meye Znoeye	6	19	female	Finished stimuli\pefear_up_jumbled_noeyes.jpg	pe	fear	no	no	0	368	16	0	z	m
Exp V1 Meye Znoeye	6	19	female	Finished stimuli\pehappy_upeyes.jpg	pe	happy	yes	yes	1	417	17	1	m	m
Exp V1 Meye Znoeye	6	19	female	Finished stimuli\jjhap_jumbledeyes.jpg	jj	happy	no	yes	1	1678	17	0	m	m
Exp V1 Meye Znoeye	6	19	female	Finished stimuli\wf_fea_up_noeyes.jpg	wf	fear	yes	no	0	721	17	0	z	m
Exp V1 Meye Znoeye	6	19	female	Finished stimuli\em_hap_jumbledeyes.jpg	em	happy	no	yes	0	877	16	0	m	z
Exp V1 Meye Znoeye	6	19	female	Finished stimuli\rfear_jumbledeyess.jpg	rf	fear	no	yes	1	1015	17	0	m	m
Exp V1 Meye Znoeye	6	19	female	Finished stimuli\JJhappyupeyes.jpg	JJ	happy	yes	yes	1	2060	16	0	m	m
Exp V1 Meye Znoeye	6	19	female	Finished stimuli\wf_fea_up eyes.jpg	wf	fear	yes	yes	1	399	17	0	m	m
Exp V1 Meye Znoeye	6	19	female	Finished stimuli\rfear_upeys.jpg	rf	fear	yes	yes	1	567	16	0	m	m
Exp V1 Meye Znoeye	6	19	female	Finished stimuli\jjfear_upeyes.jpg	jj	fear	yes	yes	0	484	16	0	m	z
Exp V1 Meye Znoeye	6	19	female	Finished stimuli\wf_hap_up_noeyes.jpg	wf	happy	yes	no	1	671	17	0	m	m
Exp V1 Meye Znoeye	6	19	female	Finished stimuli\sw_fear_upeyes.jpg	sw	fear	yes	yes	1	546	17	1	m	m
Exp V1 Meye Znoeye	6	19	female	Finished stimuli\sw_hap_jumbled_noeyes.jpg	sw	happy	no	no	0	646	16	0	z	m
Exp V1 Meye Znoeye	6	19	female	Finished stimuli\jjfear_upnoeyes.jpg	jj	fear	yes	no	0	669	17	1	z	m
Exp V1 Meye Znoeye	6	19	female	Finished stimuli\cc_happy_jumbledeyes.jpg	cc	happy	no	yes	1	435	16	0	m	m
Exp V1 Meye Znoeye	6	19	female	Finished stimuli\pefear_upeyes.jpg	pe	fear	yes	yes	1	1009	16	0	m	m
Exp V1 Meye Znoeye	6	19	female	Finished stimuli\em_fear_jumblednoeyes.jpg	em	fear	no	no	0	2110	16	0	z	m
Exp V1 Meye Znoeye	6	19	female	Finished stimuli\mo_hap_jumblednoeyes.jpg	mo	happy	no	no	1	1282	17	0	z	z
Exp V1 Meye Znoeye	6	19	female	Finished stimuli\em_hap_jumblednoeyes.jpg	em	happy	no	no	0	570	17	1	z	m
Exp V1 Meye Znoeye	6	19	female	Finished stimuli\wf_hap_jumbled_noeyes.jpg	wf	happy	no	no	0	845	16	0	z	m
Exp V1 Meye Znoeye	6	19	female	Finished stimuli\pf_fear_jumbled_noeyes.jpg	pf	fear	no	no	1	551	16	0	z	z
Exp V1 Meye Znoeye	6	19	female	Finished stimuli\JJhappyupnoeyes.jpg	JJ	happy	yes	no	1	6086	17	1	z	z
Exp V1 Meye Znoeye	6	19	female	Finished stimuli\jjhap_jumbledeyes.jpg	jj	happy	no	yes	1	672	16	0	m	m
Exp V1 Meye Znoeye	6	19	female	Finished stimuli\JJhappyjumblednoeyes.jpg	JJ	happy	no	yes	0	2086	17	1	m	z
Exp V1 Meye Znoeye	6	19	female	Finished stimuli\rhap_jumbled_noeyes.jpg	rh	happy	no	no	0	625	16	0	z	m
Exp V1 Meye Znoeye	6	19	female	Finished stimuli\pf_hap_jumbledeye.jpg	pf	happy	no	yes	0	580	17	0	m	z
Exp V1 Meye Znoeye	6	19	female	Finished stimuli\mo_fear_jumblednoeyes.jpg	mo	fear	no	no	0	952	17	1	z	m
Exp V1 Meye Znoeye	6	19	female	Finished stimuli\pehappy_noeyes.jpg	pe	happy	yes	no	0	396	16	0	z	m
Exp V1 Meye Znoeye	6	19	female	Finished stimuli\JJhappyupeyes.jpg	JJ	happy	yes	yes	0	449	16	0	m	z
Exp V1 Meye Znoeye	6	19	female	Finished stimuli\em_fear_noeyes.jpg	em	fear	yes	no	0	964	17	1	z	m
Exp V1 Meye Znoeye	6	19	female	Finished stimuli\wf_fea_up eyes.jpg	wf	fear	yes	yes	1	408	17	0	m	m
Exp V1 Meye Znoeye	6	19	female	Finished stimuli\rfear_jumbledeyess.jpg	rf	fear	no	yes	1	797	16	0	m	m
Exp V1 Meye Znoeye	6	19	female	Finished stimuli\em_hap_jumblednoeyes.jpg	em	happy	no	no	0	639	17	0	z	m
Exp V1 Meye Znoeye	6	19	female	Finished stimuli\pf_fear_up_noeyes.jpg	pf	fear	yes	no	0	2497	17	0	z	m
Exp V1 Meye Znoeye	6	19	female	Finished stimuli\pehappy_jumbled_no_eyes.jpg	pe	happy	no	no	0	508	16	0	z	m
Exp V1 Meye Znoeye	6	19	female	Finished stimuli\cc_happy_upnoeyes.jpg	cc	happy	yes	no	0	515	16	0	z	m
Exp V1 Meye Znoeye	6	19	female	Finished stimuli\pf_fear_jumbledeyes.jpg	pf	fear	no	yes	1	554	17	0	m	m
Exp V1 Meye Znoeye	6	19	female	Finished stimuli\sw_fear_jumbled_noeyes.jpg	sw	fear	no	no	1	1442	17	0	z	z
Exp V1 Meye Znoeye	6	19	female	Finished stimuli\mf_happy_jumbledeyes.jpg	mf	happy	no	yes	1	632	16	0	m	m
Exp V1 Meye Znoeye	6	19	female	Finished stimuli\sw_fear_jumbled_eyes.jpg	sw	fear	no	yes	1	502	16	0	m	m
Exp V1 Meye Znoeye	6	19	female	Finished stimuli\pehappy_jumbled_eyes.jpg	pe	happy	no	yes	1	306	17	1	m	m
Exp V1 Meye Znoeye	6	19	female	Finished stimuli\pf_hap_jumbled_noeye.jpg	pf	happy	no	no	1	1753	17	0	z	z
Exp V1 Meye Znoeye	6	19	female	Finished stimuli\pf_hap_up_noeye.jpg	pf	happy	yes	no	0	541	16	0	z	m
Exp V1 Meye Znoeye	6	19	female	Finished stimuli\cc_happy_jumblednoeyes.jpg	cc	happy	no	no	0	478	17	1	z	m
Exp V1 Meye Znoeye	6	19	female	Finished stimuli\cc_fearjumbledno_eye.jpg	cc	fear	no	no	0	1421	17	1	z	m
Exp V1 Meye Znoeye	6	19	female	Finished stimuli\wf_fea_jumbled_eyes.jpg	wf	fear	no	yes	0	2790	17	0	m	z
Exp V1 Meye Znoeye	6	19	female	Finished stimuli\cc_fear_jumbledeyes.jpg	cc	fear	no	yes	1	415	17	0	m	m
Exp V1 Meye Znoeye	6	19	female	Finished stimuli\em_fear_jumblednoeyes.jpg	em	fear	no	no	0	1353	17	1	z	m
Exp V1 Meye Znoeye	6	19	female	Finished stimuli\mf_happy_upeyes.jpg	mf	happy	yes	yes	1	609	16	0	m	m
Exp V1 Meye Znoeye	6	19	female	Finished stimuli\sw_fear_noeyes.jpg	sw	fear	yes	no	1	539	17	0	z	z
Exp V1 Meye Znoeye	6	19	female	Finished stimuli\rhap_noeyes.jpg	rh	happy	yes	no	0	900	17	1	z	m
Exp V1 Meye Znoeye	6	19	female	Finished stimuli\rfear_upeys.jpg	rf	fear	yes	yes	1	706	16	0	m	m
Exp V1 Meye Znoeye	6	19	female	Finished stimuli\rfear_up_noeys.jpg	rf	fear	yes	no	0	1129	16	0	z	m
Exp V1 Meye Znoeye	6	19	female	Finished stimuli\mf_happy_jumbled_noeyes.jpg	mf	happy	no	no	0	353	16	0	z	m
Exp V1 Meye Znoeye	6	19	female	Finished stimuli\wf_fea_jumbled_noeyes.jpg	wf	fear	no	no	0	670	17	0	z	m
Exp V1 Meye Znoeye	6	19	female	Finished stimuli\jjfear_jumbledeyes.jpg	jj	fear	no	yes	1	477	16	0	m	m
Exp V1 Meye Znoeye	6	19	female	Finished stimuli\rhap.jpg	rh	happy	yes	yes	1	612	17	0	m	m
Exp V1 Meye Znoeye	6	19	female	Finished stimuli\mo_fear_jumbledeyes.jpg	mo	fear	no	yes	1	453	16	0	m	m
Exp V1 Meye Znoeye	6	19	female	Finished stimuli\cc_happy_jumbledeyes.jpg	cc	happy	no	yes	1	1630	16	0	m	m
Exp V1 Meye Znoeye	6	19	female	Finished stimuli\em_fear_upeyes.jpg	em	fear	yes	yes	0	1324	17	0	m	z
Exp V1 Meye Znoeye	6	19	female	Finished stimuli\jjfear_upeyes.jpg	jj	fear	yes	yes	1	472	16	0	m	m
Exp V1 Meye Znoeye	6	19	female	Finished stimuli\mf_fear_up_noeye.jpg	mf	fear	yes	no	0	980	16	0	z	m
Exp V1 Meye Znoeye	6	19	female	Finished stimuli\em_hap_upeyes.jpg	em	happy	yes	yes	0	525	17	0	m	z
Exp V1 Meye Znoeye	6	19	female	Finished stimuli\wf_hap_up_noeyes.jpg	wf	happy	yes	no	1	461	17	1	m	m
Exp V1 Meye Znoeye	6	19	female	Finished stimuli\pf_fear_upeyes.jpg	pf	fear	yes	yes	1	539	17	0	m	m
Exp V1 Meye Znoeye	6	19	female	Finished stimuli\sw_hap_jumbled_noeyes.jpg	sw	happy	no	no	1	783	17	1	z	z
Exp V1 Meye Znoeye	6	19	female	Finished stimuli\mo_hap_up_noeyes.jpg	mo	happy	yes	no	0	415	17	1	z	m
Exp V1 Meye Znoeye	6	19	female	Finished stimuli\sw_fear_upeyes.jpg	sw	fear	yes	yes	1	705	16	0	m	m
Exp V1 Meye Znoeye	6	19	female	Finished stimuli\pefear_upeyes.jpg	pe	fear	yes	yes	1	537	17	1	m	m
Exp V1 Meye Znoeye	6	19	female	Finished stimuli\mo_hap_jumblednoeyes.jpg	mo	happy	no	no	1	802	16	0	z	z
Exp V1 Meye Znoeye	6	19	female	Finished stimuli\mf_fear_upeye.jpg	mf	fear	yes	yes	1	728	17	0	m	m
Exp V1 Meye Znoeye	6	19	female	Finished stimuli\pefear_up_jumbled_noeyes.jpg	pe	fear	no	no	1	820	17	1	z	z
Exp V1 Meye Znoeye	6	19	female	Finished stimuli\mf_fear_jumblednoeye.jpg	mf	fear	no	no	1	1139	17	1	z	z
Exp V1 Meye Znoeye	6	19	female	Finished stimuli\cc_fear_up.jpg	cc	fear	yes	yes	1	711	17	1	m	m
Exp V1 Meye Znoeye	6	19	female	Finished stimuli\sw_hap_noeyes.jpg	sw	happy	yes	no	1	630	17	0	z	z
Exp V1 Meye Znoeye	6	19	female	Finished stimuli\mo_fear_upeyes.jpg	mo	fear	yes	yes	1	440	17	1	m	m
Exp V1 Meye Znoeye	6	19	female	Finished stimuli\jjfear_jumblednoeyes.jpg	jj	fear	no	no	0	646	17	0	z	m
Exp V1 Meye Znoeye	6	19	female	Finished stimuli\mo_fear_upnoeyes.jpg	mo	fear	yes	no	0	1678	17	0	m	z
Exp V1 Meye Znoeye	6	19	female	Finished stimuli\jjfear_upnoeyes.jpg	jj	fear	yes	no	0	377	17	0	z	m
Exp V1 Meye Znoeye	6	19	female	Finished stimuli\em_hap_jumbledeyes.jpg	em	happy	no	yes	0	466	17	0	m	z
Exp V1 Meye Znoeye	6	19	female	Finished stimuli\pefear_up_noeyes.jpg	pe	fear	yes	no	0	1125	17	1	z	m
Exp V1 Meye Znoeye	6	19	female	Finished stimuli\pehappy_upeyes.jpg	pe	happy	yes	yes	1	593	16	0	m	m
Exp V1 Meye Znoeye	6	19	female	Finished stimuli\mo_hap_upeyes.jpg	mo	happy	yes	yes	1	1055	17	0	m	m
Exp V1 Meye Znoeye	6	19	female	Finished stimuli\wf_hap_jumbled_noeyes.jpg	wf	happy	no	no	0	561	17	0	z	m
Exp V1 Meye Znoeye	6	19	female	Finished stimuli\sw_hap_upeyes.jpg	sw	happy	yes	yes	0	498	17	1	m	z
Exp V1 Meye Znoeye	6	19	female	Finished stimuli\wf_hap_upeyes.jpg	wf	happy	yes	yes	0	697	17	0	m	z
Exp V1 Meye Znoeye	6	19	female	Finished stimuli\pefear_up_jumbledeyes.jpg	pe	fear	no	yes	1	792	16	0	m	m
Exp V1 Meye Znoeye	6	19	female	Finished stimuli\sw_hap_jumbledeyes.jpg	sw	happy	no	yes	0	865	16	0	m	z
Exp V1 Meye Znoeye	6	19	female	Finished stimuli\wf_hap_upeyes.jpg	wf	happy	yes	yes	0	1095	16	0	m	z
Exp V1 Meye Znoeye	6	19	female	Finished stimuli\mf_fear_jumbledeye.jpg	mf	fear	no	yes	1	1486	17	1	m	m
Exp V1 Meye Znoeye	6	19	female	Finished stimuli\wf_hap_jumbledeyes.jpg	wf	happy	no	yes	1	577	16	0	z	z
Exp V1 Meye Znoeye	6	19	female	Finished stimuli\rfear_jumbled_noeyess.jpg	rf	fear	no	no	1	826	16	0	z	z
Exp V1 Meye Znoeye	6	19	female	Finished stimuli\rhap_jumbledeyes.jpg	rh	happy	no	yes	1	474	16	0	m	m
Exp V1 Meye Znoeye	6	19	female	Finished stimuli\mo_hap_jumbledeyes.jpg	mo	happy	no	yes	1	715	17	1	m	m
Exp V1 Meye Znoeye	6	19	female	Finished stimuli\pf_hap_upeye.jpg	pf	happy	yes	yes	1	701	16	0	m	m
Exp V1 Meye Znoeye	6	19	female	Finished stimuli\mf_happy_upno_eyes.jpg	mf	happy	yes	no	0	445	17	0	z	m
Exp V1 Meye Znoeye	6	19	female	Finished stimuli\cc_happy_upeyes.jpg	cc	happy	yes	yes	0	559	17	0	m	z
Exp V1 Meye Znoeye	6	19	female	Finished stimuli\wf_fea_up_noeyes.jpg	wf	fear	yes	no	0	375	16	0	z	m
Exp V1 Meye Znoeye	6	19	female	Finished stimuli\em_fear_jumbledeyes.jpg	em	fear	no	yes	0	1304	17	0	m	z
Exp V1 Meye Znoeye	6	19	female	Finished stimuli\cc_fear_noeyes.jpg	cc	fear	yes	no	1	1335	17	0	z	z
Exp V1 Meye Znoeye	6	19	female	Finished stimuli\em_hap_noeyes.jpg	em	happy	yes	no	0	851	17	0	z	m
Exp V1 Meye Znoeye	6	19	female	Finished stimuli\pf_fear_jumbled_noeyes.jpg	pf	fear	no	no	0	1705	17	0	z	m
Exp V1 Zeye Mnoeye	1	0	male	Finished stimuli\cc_happy_jumbledeyes.jpg	cc	happy	no	yes	1	394	0	7	z	z
Exp V1 Zeye Mnoeye	1	0	male	Finished stimuli\mf_happy_upno_eyes.jpg	mf	happy	yes	no	0	306	0	6	m	z
Exp V1 Zeye Mnoeye	1	0	male	Finished stimuli\em_hap_upeyes.jpg	em	happy	yes	yes	1	282	0	7	z	z
Exp V1 Zeye Mnoeye	1	0	male	Finished stimuli\wf_hap_up_noeyes.jpg	wf	happy	yes	no	0	221	0	6	m	z
Exp V1 Zeye Mnoeye	1	0	male	Finished stimuli\em_hap_noeyes.jpg	em	happy	yes	no	1	786	0	1273	m	m
Exp V1 Zeye Mnoeye	1	0	male	Finished stimuli\mo_fear_jumblednoeyes.jpg	mo	fear	no	no	0	362	0	7	m	z
Exp V1 Zeye Mnoeye	1	0	male	Finished stimuli\pefear_upeyes.jpg	pe	fear	yes	yes	1	309	0	6	z	z
Exp V1 Zeye Mnoeye	1	0	male	Finished stimuli\rhap_noeyes.jpg	rh	happy	yes	no	0	253	0	6	m	z
Exp V1 Zeye Mnoeye	1	0	male	Finished stimuli\wf_hap_upeyes.jpg	wf	happy	yes	yes	1	610	0	1273	z	z
Exp V1 Zeye Mnoeye	1	0	male	Finished stimuli\sw_fear_noeyes.jpg	sw	fear	yes	no	0	320	0	7	m	z
Exp V1 Zeye Mnoeye	1	0	male	Finished stimuli\mf_fear_jumblednoeye.jpg	mf	fear	no	no	0	354	0	7	m	z
Exp V1 Zeye Mnoeye	1	0	male	Finished stimuli\cc_happy_upnoeyes.jpg	cc	happy	yes	no	1	738	0	7	m	m
Exp V1 Zeye Mnoeye	1	0	male	Finished stimuli\sw_hap_noeyes.jpg	sw	happy	yes	no	1	1155	0	1260	m	m
Exp V1 Zeye Mnoeye	1	0	male	Finished stimuli\rfear_jumbledeyess.jpg	rf	fear	no	yes	1	419	0	7	z	z
Exp V1 Zeye Mnoeye	1	0	male	Finished stimuli\JJhappyupnoeyes.jpg	JJ	happy	yes	no	0	208	0	153	m	z
Exp V1 Zeye Mnoeye	1	0	male	Finished stimuli\pehappy_jumbled_no_eyes.jpg	pe	happy	no	no	1	323	0	7	m	m
Exp V1 Zeye Mnoeye	1	0	male	Finished stimuli\mf_fear_upeye.jpg	mf	fear	yes	yes	0	619	0	1274	z	m
Exp V1 Zeye Mnoeye	1	0	male	Finished stimuli\pf_hap_up_noeye.jpg	pf	happy	yes	no	1	504	0	6	m	m
Exp V1 Zeye Mnoeye	1	0	male	Finished stimuli\sw_fear_jumbled_noeyes.jpg	sw	fear	no	no	1	3720	0	6	m	m
Exp V1 Zeye Mnoeye	1	0	male	Finished stimuli\cc_fear_noeyes.jpg	cc	fear	yes	no	1	307	0	6	m	m
Exp V1 Zeye Mnoeye	1	0	male	Finished stimuli\JJhappyupeyes.jpg	JJ	happy	yes	yes	1	954	0	1260	z	z
Exp V1 Zeye Mnoeye	1	0	male	Finished stimuli\sw_fear_jumbled_eyes.jpg	sw	fear	no	yes	0	467	0	6	z	m
Exp V1 Zeye Mnoeye	1	0	male	Finished stimuli\mo_hap_jumblednoeyes.jpg	mo	happy	no	no	1	1778	0	6	m	m
Exp V1 Zeye Mnoeye	1	0	male	Finished stimuli\JJhappyjumblednoeyes.jpg	JJ	happy	no	yes	0	471	0	7	z	m
Exp V1 Zeye Mnoeye	1	0	male	Finished stimuli\mf_happy_jumbled_noeyes.jpg	mf	happy	no	no	1	1735	0	1273	m	m
Exp V1 Zeye Mnoeye	1	0	male	Finished stimuli\pehappy_jumbled_eyes.jpg	pe	happy	no	yes	1	901	0	7	z	z
Exp V1 Zeye Mnoeye	1	0	male	Finished stimuli\em_fear_upeyes.jpg	em	fear	yes	yes	1	302	0	7	z	z
Exp V1 Zeye Mnoeye	1	0	male	Finished stimuli\mo_fear_upnoeyes.jpg	mo	fear	yes	no	1	845	0	1260	m	m
Exp V1 Zeye Mnoeye	1	0	male	Finished stimuli\mf_fear_up_noeye.jpg	mf	fear	yes	no	1	304	0	7	m	m
Exp V1 Zeye Mnoeye	1	0	male	Finished stimuli\wf_fea_jumbled_noeyes.jpg	wf	fear	no	no	1	248	0	7	m	m
Exp V1 Zeye Mnoeye	1	0	male	Finished stimuli\cc_fear_jumbledeyes.jpg	cc	fear	no	yes	1	365	0	6	z	z
Exp V1 Zeye Mnoeye	1	0	male	Finished stimuli\jjhap_jumbledeyes.jpg	jj	happy	no	yes	1	472	0	140	z	z
Exp V1 Zeye Mnoeye	1	0	male	Finished stimuli\pf_fear_jumbled_noeyes.jpg	pf	fear	no	no	1	341	0	6	m	m
Exp V1 Zeye Mnoeye	1	0	male	Finished stimuli\sw_fear_upeyes.jpg	sw	fear	yes	yes	1	394	0	7	z	z
Exp V1 Zeye Mnoeye	1	0	male	Finished stimuli\pf_hap_upeye.jpg	pf	happy	yes	yes	1	306	0	7	z	z
Exp V1 Zeye Mnoeye	1	0	male	Finished stimuli\sw_hap_upeyes.jpg	sw	happy	yes	yes	1	253	0	7	z	z
Exp V1 Zeye Mnoeye	1	0	male	Finished stimuli\cc_fear_up.jpg	cc	fear	yes	yes	1	136	0	153	z	z
Exp V1 Zeye Mnoeye	1	0	male	Finished stimuli\em_hap_jumbledeyes.jpg	em	happy	no	yes	0	848	0	1273	z	m
Exp V1 Zeye Mnoeye	1	0	male	Finished stimuli\pefear_up_jumbledeyes.jpg	pe	fear	no	yes	1	307	0	7	z	z
Exp V1 Zeye Mnoeye	1	0	male	Finished stimuli\pf_fear_up_noeyes.jpg	pf	fear	yes	no	1	323	0	7	m	m
Exp V1 Zeye Mnoeye	1	0	male	Finished stimuli\mf_happy_upeyes.jpg	mf	happy	yes	yes	1	373	0	7	z	z
Exp V1 Zeye Mnoeye	1	0	male	Finished stimuli\em_fear_noeyes.jpg	em	fear	yes	no	1	435	0	7	m	m
Exp V1 Zeye Mnoeye	1	0	male	Finished stimuli\rfear_jumbled_noeyess.jpg	rf	fear	no	no	1	352	0	6	m	m
Exp V1 Zeye Mnoeye	1	0	male	Finished stimuli\mo_fear_upeyes.jpg	mo	fear	yes	yes	1	304	0	6	z	z
Exp V1 Zeye Mnoeye	1	0	male	Finished stimuli\wf_hap_jumbled_noeyes.jpg	wf	happy	no	no	1	280	0	6	m	m
Exp V1 Zeye Mnoeye	1	0	male	Finished stimuli\sw_hap_jumbled_noeyes.jpg	sw	happy	no	no	1	379	0	6	m	m
Exp V1 Zeye Mnoeye	1	0	male	Finished stimuli\rhap_jumbled_noeyes.jpg	rh	happy	no	no	1	894	0	1274	m	m
Exp V1 Zeye Mnoeye	1	0	male	Finished stimuli\jjfear_jumbledeyes.jpg	jj	fear	no	yes	1	302	0	7	z	z
Exp V1 Zeye Mnoeye	1	0	male	Finished stimuli\wf_fea_up eyes.jpg	wf	fear	yes	yes	1	274	0	6	z	z
Exp V1 Zeye Mnoeye	1	0	male	Finished stimuli\pehappy_upeyes.jpg	pe	happy	yes	yes	1	259	0	6	z	z
Exp V1 Zeye Mnoeye	1	0	male	Finished stimuli\wf_fea_up_noeyes.jpg	wf	fear	yes	no	1	221	0	167	m	m
Exp V1 Zeye Mnoeye	1	0	male	Finished stimuli\pefear_up_jumbled_noeyes.jpg	pe	fear	no	no	1	407	0	7	m	m
Exp V1 Zeye Mnoeye	1	0	male	Finished stimuli\rfear_upeys.jpg	rf	fear	yes	yes	1	338	0	6	z	z
Exp V1 Zeye Mnoeye	1	0	male	Finished stimuli\cc_happy_upeyes.jpg	cc	happy	yes	yes	1	402	0	6	z	z
[truncated: 2,826 more rows]
