# Supplementary material for: The perceptual saliency of fearful eyes and smiles: A signal detection study
Source: PLoS One. 2017 Mar 7;12(3):e0173199. doi: 10.1371/journal.pone.0173199 (PMC5340363; doi:10.1371/journal.pone.0173199)
Supplement: S3 Fig — The overall data pertaining to experiment 3a. (XLSX) [file pone.0173199.s003.xlsx]

## Sheet: Exp3A_N20
E:\Eye Detection Data\Zara 27112013\EyeDetection_exp\Standard\Exp3A_upload.emrg2
Subject	Age	Sex	Stimuli	face	Expression	canonical	Eyes	RespFaceNoface.ACC	RespFaceNoface.RT	Target.DurationError	BackwardMask.OnsetDelay	RespFaceNoface.CRESP	RespFaceNoface.RESP
1	18	male	Finished stimuli\cc_fear_up.jpg	cc	fear	yes	yes	1	267	-1	6	m	m
1	18	male	Finished stimuli\JJhappyupeyes.jpg	JJ	happy	yes	yes	1	222	-1	6	m	m
1	18	male	Finished stimuli\pf_hap_upeye.jpg	pf	happy	yes	yes	1	187	-1	6	m	m
1	18	male	Finished stimuli\pf_hap_jumbledeye.jpg	pf	happy	no	yes	1	377	-1	7	m	m
1	18	male	Finished stimuli\rfear_up_noeys.jpg	rf	fear	yes	no	1	455	-1	6	z	z
1	18	male	Finished stimuli\rfear_jumbledeyess.jpg	rf	fear	no	yes	1	235	-1	6	m	m
1	18	male	Finished stimuli\mo_fear_upeyes.jpg	mo	fear	yes	yes	1	248	-1	6	m	m
1	18	male	Finished stimuli\pf_fear_jumbledeyes.jpg	pf	fear	no	yes	1	195	-1	7	m	m
1	18	male	Finished stimuli\wf_hap_jumbled_noeyes.jpg	wf	happy	no	no	1	323	-1	7	z	z
1	18	male	Finished stimuli\em_hap_jumblednoeyes.jpg	em	happy	no	no	1	296	-1	7	z	z
1	18	male	Finished stimuli\wf_fea_jumbled_noeyes.jpg	wf	fear	no	no	1	342	-1	7	z	z
1	18	male	Finished stimuli\em_fear_upeyes.jpg	em	fear	yes	yes	1	182	-1	7	m	m
1	18	male	Finished stimuli\mo_fear_jumblednoeyes.jpg	mo	fear	no	no	1	296	-1	6	z	z
1	18	male	Finished stimuli\pf_fear_up_noeyes.jpg	pf	fear	yes	no	1	302	-1	6	z	z
1	18	male	Finished stimuli\rhap_noeyes.jpg	rh	happy	yes	no	0	196	-1	6	z	m
1	18	male	Finished stimuli\mf_happy_jumbled_noeyes.jpg	mf	happy	no	no	0	350	-1	7	z	m
1	18	male	Finished stimuli\mf_happy_upeyes.jpg	mf	happy	yes	yes	1	217	-1	7	m	m
1	18	male	Finished stimuli\cc_fearjumbledno_eye.jpg	cc	fear	no	no	1	738	-1	7	z	z
1	18	male	Finished stimuli\mo_hap_jumbledeyes.jpg	mo	happy	no	yes	1	190	-1	7	m	m
1	18	male	Finished stimuli\pf_fear_upeyes.jpg	pf	fear	yes	yes	1	225	-1	6	m	m
1	18	male	Finished stimuli\pefear_up_jumbledeyes.jpg	pe	fear	no	yes	1	177	-1	7	m	m
1	18	male	Finished stimuli\pehappy_upeyes.jpg	pe	happy	yes	yes	1	204	-1	7	m	m
1	18	male	Finished stimuli\sw_fear_jumbled_eyes.jpg	sw	fear	no	yes	1	197	-1	6	m	m
1	18	male	Finished stimuli\sw_fear_jumbled_noeyes.jpg	sw	fear	no	no	0	263	-1	7	z	m
1	18	male	Finished stimuli\mf_happy_jumbledeyes.jpg	mf	happy	no	yes	1	270	-1	6	m	m
1	18	male	Finished stimuli\wf_hap_upeyes.jpg	wf	happy	yes	yes	1	213	-1	6	m	m
1	18	male	Finished stimuli\em_fear_noeyes.jpg	em	fear	yes	no	1	278	-1	7	z	z
1	18	male	Finished stimuli\pefear_upeyes.jpg	pe	fear	yes	yes	1	205	-1	7	m	m
1	18	male	Finished stimuli\mf_fear_jumblednoeye.jpg	mf	fear	no	no	1	439	-1	7	z	z
1	18	male	Finished stimuli\wf_hap_up_noeyes.jpg	wf	happy	yes	no	0	148	-1	6	z	m
1	18	male	Finished stimuli\rhap_jumbled_noeyes.jpg	rh	happy	no	no	1	448	-1	7	z	z
1	18	male	Finished stimuli\wf_hap_jumbledeyes.jpg	wf	happy	no	yes	1	232	-1	7	m	m
1	18	male	Finished stimuli\wf_fea_up eyes.jpg	wf	fear	yes	yes	1	208	-1	6	m	m
1	18	male	Finished stimuli\mo_fear_jumbledeyes.jpg	mo	fear	no	yes	1	274	-1	6	m	m
1	18	male	Finished stimuli\mo_fear_upnoeyes.jpg	mo	fear	yes	no	0	185	-1	6	z	m
1	18	male	Finished stimuli\mf_fear_upeye.jpg	mf	fear	yes	yes	1	259	-1	7	m	m
1	18	male	Finished stimuli\sw_hap_jumbledeyes.jpg	sw	happy	no	yes	1	210	-1	7	m	m
1	18	male	Finished stimuli\cc_happy_jumblednoeyes.jpg	cc	happy	no	no	1	275	-1	6	z	z
1	18	male	Finished stimuli\mo_hap_up_noeyes.jpg	mo	happy	yes	no	1	393	-1	7	z	z
1	18	male	Finished stimuli\mo_hap_upeyes.jpg	mo	happy	yes	yes	1	203	-1	7	m	m
1	18	male	Finished stimuli\wf_fea_up_noeyes.jpg	wf	fear	yes	no	1	268	-1	7	z	z
1	18	male	Finished stimuli\jjfear_jumblednoeyes.jpg	jj	fear	no	no	1	308	-1	7	z	z
1	18	male	Finished stimuli\pehappy_noeyes.jpg	pe	happy	yes	no	0	121	-1	7	z	m
1	18	male	Finished stimuli\jjfear_upeyes.jpg	jj	fear	yes	yes	1	158	-1	6	m	m
1	18	male	Finished stimuli\jjhap_jumbledeyes.jpg	jj	happy	no	yes	1	170	-1	7	m	m
1	18	male	Finished stimuli\pehappy_jumbled_no_eyes.jpg	pe	happy	no	no	0	237	-1	7	z	m
1	18	male	Finished stimuli\sw_fear_upeyes.jpg	sw	fear	yes	yes	0	221	-1	7	m	z
1	18	male	Finished stimuli\em_fear_jumbledeyes.jpg	em	fear	no	yes	1	231	-1	7	m	m
1	18	male	Finished stimuli\jjfear_upnoeyes.jpg	jj	fear	yes	no	0	151	-1	6	z	m
1	18	male	Finished stimuli\rhap.jpg	rh	happy	yes	yes	1	139	-1	7	m	m
1	18	male	Finished stimuli\cc_happy_upnoeyes.jpg	cc	happy	yes	no	1	327	-1	6	z	z
1	18	male	Finished stimuli\em_hap_upeyes.jpg	em	happy	yes	yes	1	348	-1	7	m	m
1	18	male	Finished stimuli\mf_fear_jumbledeye.jpg	mf	fear	no	yes	1	152	-1	7	m	m
1	18	male	Finished stimuli\pf_hap_up_noeye.jpg	pf	happy	yes	no	0	243	-1	7	z	m
1	18	male	Finished stimuli\em_fear_jumblednoeyes.jpg	em	fear	no	no	1	243	-1	7	z	z
1	18	male	Finished stimuli\em_hap_noeyes.jpg	em	happy	yes	no	1	323	-1	6	z	z
1	18	male	Finished stimuli\rfear_upeys.jpg	rf	fear	yes	yes	1	168	-1	7	m	m
1	18	male	Finished stimuli\sw_hap_noeyes.jpg	sw	happy	yes	no	0	202	-1	7	z	m
1	18	male	Finished stimuli\cc_happy_upeyes.jpg	cc	happy	yes	yes	1	252	-1	6	m	m
1	18	male	Finished stimuli\sw_fear_noeyes.jpg	sw	fear	yes	no	1	292	-1	6	z	z
1	18	male	Finished stimuli\pehappy_jumbled_eyes.jpg	pe	happy	no	yes	1	266	-1	6	m	m
1	18	male	Finished stimuli\cc_fear_noeyes.jpg	cc	fear	yes	no	1	369	-1	6	z	z
1	18	male	Finished stimuli\sw_hap_upeyes.jpg	sw	happy	yes	yes	1	220	-1	7	m	m
1	18	male	Finished stimuli\rfear_jumbled_noeyess.jpg	rf	fear	no	no	1	341	-1	7	z	z
1	18	male	Finished stimuli\sw_hap_jumbled_noeyes.jpg	sw	happy	no	no	0	241	-1	7	z	m
1	18	male	Finished stimuli\jjfear_jumbledeyes.jpg	jj	fear	no	yes	1	161	-1	6	m	m
1	18	male	Finished stimuli\mf_fear_up_noeye.jpg	mf	fear	yes	no	0	372	-1	7	z	m
1	18	male	Finished stimuli\pf_hap_jumbled_noeye.jpg	pf	happy	no	no	1	207	-1	7	z	z
1	18	male	Finished stimuli\pefear_up_noeyes.jpg	pe	fear	yes	no	1	305	-1	7	z	z
1	18	male	Finished stimuli\wf_fea_jumbled_eyes.jpg	wf	fear	no	yes	1	222	-1	7	m	m
1	18	male	Finished stimuli\pf_fear_jumbled_noeyes.jpg	pf	fear	no	no	0	384	-1	7	z	m
1	18	male	Finished stimuli\pefear_up_jumbled_noeyes.jpg	pe	fear	no	no	0	290	-1	6	z	m
1	18	male	Finished stimuli\em_hap_jumbledeyes.jpg	em	happy	no	yes	0	289	-1	7	m	z
1	18	male	Finished stimuli\JJhappyupnoeyes.jpg	JJ	happy	yes	no	1	311	-1	6	z	z
1	18	male	Finished stimuli\JJhappyjumblednoeyes.jpg	JJ	happy	no	no	1	300	-1	7	z	z
1	18	male	Finished stimuli\rhap_jumbledeyes.jpg	rh	happy	no	yes	1	258	-1	6	m	m
1	18	male	Finished stimuli\mo_hap_jumblednoeyes.jpg	mo	happy	no	no	1	289	-1	6	z	z
1	18	male	Finished stimuli\cc_happy_jumbledeyes.jpg	cc	happy	no	yes	1	352	-1	7	m	m
1	18	male	Finished stimuli\cc_fear_jumbledeyes.jpg	cc	fear	no	yes	1	195	-1	7	m	m
1	18	male	Finished stimuli\mf_happy_upno_eyes.jpg	mf	happy	yes	no	1	293	-1	7	z	z
1	18	male	Finished stimuli\pf_fear_jumbledeyes.jpg	pf	fear	no	yes	1	248	-1	7	m	m
1	18	male	Finished stimuli\sw_hap_noeyes.jpg	sw	happy	yes	no	0	256	-1	7	z	m
1	18	male	Finished stimuli\jjhap_jumbledeyes.jpg	jj	happy	no	yes	1	313	-1	7	m	m
1	18	male	Finished stimuli\mf_fear_upeye.jpg	mf	fear	yes	yes	1	326	-1	6	m	m
1	18	male	Finished stimuli\mf_happy_upno_eyes.jpg	mf	happy	yes	no	1	250	-1	7	z	z
1	18	male	Finished stimuli\em_fear_jumblednoeyes.jpg	em	fear	no	no	1	250	-1	7	z	z
1	18	male	Finished stimuli\sw_hap_jumbled_noeyes.jpg	sw	happy	no	no	1	306	-1	6	z	z
1	18	male	Finished stimuli\pf_hap_up_noeye.jpg	pf	happy	yes	no	0	177	-1	7	z	m
1	18	male	Finished stimuli\rfear_upeys.jpg	rf	fear	yes	yes	1	180	-1	7	m	m
1	18	male	Finished stimuli\pf_fear_up_noeyes.jpg	pf	fear	yes	no	1	286	-1	6	z	z
1	18	male	Finished stimuli\mo_hap_jumbledeyes.jpg	mo	happy	no	yes	1	173	-1	6	m	m
1	18	male	Finished stimuli\em_hap_jumblednoeyes.jpg	em	happy	no	no	0	201	-1	7	z	m
1	18	male	Finished stimuli\jjfear_upnoeyes.jpg	jj	fear	yes	no	0	139	-1	7	z	m
1	18	male	Finished stimuli\pf_hap_jumbled_noeye.jpg	pf	happy	no	no	1	296	-1	7	z	z
1	18	male	Finished stimuli\mo_fear_upnoeyes.jpg	mo	fear	yes	no	1	335	-1	6	z	z
1	18	male	Finished stimuli\cc_happy_jumbledeyes.jpg	cc	happy	no	yes	1	180	-1	6	m	m
1	18	male	Finished stimuli\mo_hap_up_noeyes.jpg	mo	happy	yes	no	0	135	-1	7	z	m
1	18	male	Finished stimuli\rfear_jumbled_noeyess.jpg	rf	fear	no	no	1	292	-1	7	z	z
1	18	male	Finished stimuli\cc_fear_up.jpg	cc	fear	yes	yes	1	178	-1	6	m	m
1	18	male	Finished stimuli\em_hap_upeyes.jpg	em	happy	yes	yes	1	197	-1	7	m	m
1	18	male	Finished stimuli\mf_happy_upeyes.jpg	mf	happy	yes	yes	1	151	-1	6	m	m
1	18	male	Finished stimuli\rhap.jpg	rh	happy	yes	yes	1	164	-1	7	m	m
1	18	male	Finished stimuli\sw_fear_jumbled_eyes.jpg	sw	fear	no	yes	1	183	-1	7	m	m
1	18	male	Finished stimuli\wf_fea_jumbled_noeyes.jpg	wf	fear	no	no	0	217	-1	6	z	m
1	18	male	Finished stimuli\JJhappyupnoeyes.jpg	JJ	happy	yes	no	0	171	-1	6	z	m
1	18	male	Finished stimuli\wf_fea_up eyes.jpg	wf	fear	yes	yes	1	295	-1	7	m	m
1	18	male	Finished stimuli\wf_hap_up_noeyes.jpg	wf	happy	yes	no	1	357	-1	7	z	z
1	18	male	Finished stimuli\wf_fea_up_noeyes.jpg	wf	fear	yes	no	1	346	-1	7	z	z
1	18	male	Finished stimuli\pehappy_upeyes.jpg	pe	happy	yes	yes	1	230	-1	7	m	m
1	18	male	Finished stimuli\mf_fear_jumbledeye.jpg	mf	fear	no	yes	1	288	-1	7	m	m
1	18	male	Finished stimuli\cc_happy_upeyes.jpg	cc	happy	yes	yes	1	182	-1	7	m	m
1	18	male	Finished stimuli\jjfear_jumblednoeyes.jpg	jj	fear	no	no	0	265	-1	7	z	m
1	18	male	Finished stimuli\wf_hap_upeyes.jpg	wf	happy	yes	yes	1	193	-1	7	m	m
1	18	male	Finished stimuli\mo_hap_jumblednoeyes.jpg	mo	happy	no	no	1	322	-1	7	z	z
1	18	male	Finished stimuli\mo_fear_jumbledeyes.jpg	mo	fear	no	yes	1	189	-1	7	m	m
1	18	male	Finished stimuli\pf_fear_jumbled_noeyes.jpg	pf	fear	no	no	0	416	-1	7	z	m
1	18	male	Finished stimuli\em_fear_jumbledeyes.jpg	em	fear	no	yes	1	178	-1	7	m	m
1	18	male	Finished stimuli\sw_hap_jumbledeyes.jpg	sw	happy	no	yes	1	149	-1	7	m	m
1	18	male	Finished stimuli\rhap_jumbled_noeyes.jpg	rh	happy	no	no	1	321	-1	6	z	z
1	18	male	Finished stimuli\pefear_up_noeyes.jpg	pe	fear	yes	no	0	111	-1	6	z	m
1	18	male	Finished stimuli\mf_fear_jumblednoeye.jpg	mf	fear	no	no	1	301	-1	7	z	z
1	18	male	Finished stimuli\pf_hap_upeye.jpg	pf	happy	yes	yes	1	267	-1	7	m	m
1	18	male	Finished stimuli\pehappy_jumbled_eyes.jpg	pe	happy	no	yes	1	235	-1	6	m	m
1	18	male	Finished stimuli\mf_happy_jumbled_noeyes.jpg	mf	happy	no	no	0	316	-1	6	z	m
1	18	male	Finished stimuli\wf_hap_jumbledeyes.jpg	wf	happy	no	yes	1	226	-1	6	m	m
1	18	male	Finished stimuli\mo_fear_jumblednoeyes.jpg	mo	fear	no	no	1	467	-1	7	z	z
1	18	male	Finished stimuli\cc_fearjumbledno_eye.jpg	cc	fear	no	no	1	258	-1	7	z	z
1	18	male	Finished stimuli\cc_fear_jumbledeyes.jpg	cc	fear	no	yes	1	195	-1	6	m	m
1	18	male	Finished stimuli\rfear_jumbledeyess.jpg	rf	fear	no	yes	1	197	-1	7	m	m
1	18	male	Finished stimuli\rhap_jumbledeyes.jpg	rh	happy	no	yes	1	231	-1	7	m	m
1	18	male	Finished stimuli\rhap_noeyes.jpg	rh	happy	yes	no	1	320	-1	7	z	z
1	18	male	Finished stimuli\pefear_up_jumbledeyes.jpg	pe	fear	no	yes	1	149	-1	7	m	m
1	18	male	Finished stimuli\mo_hap_upeyes.jpg	mo	happy	yes	yes	1	194	-1	7	m	m
1	18	male	Finished stimuli\mf_fear_up_noeye.jpg	mf	fear	yes	no	1	468	-1	7	z	z
1	18	male	Finished stimuli\cc_happy_jumblednoeyes.jpg	cc	happy	no	no	1	291	-1	7	z	z
1	18	male	Finished stimuli\pehappy_jumbled_no_eyes.jpg	pe	happy	no	no	0	243	-1	7	z	m
1	18	male	Finished stimuli\mf_happy_jumbledeyes.jpg	mf	happy	no	yes	1	187	-1	6	m	m
1	18	male	Finished stimuli\sw_fear_upeyes.jpg	sw	fear	yes	yes	1	198	-1	6	m	m
1	18	male	Finished stimuli\em_fear_upeyes.jpg	em	fear	yes	yes	1	193	-1	7	m	m
1	18	male	Finished stimuli\pefear_up_jumbled_noeyes.jpg	pe	fear	no	no	0	251	-1	6	z	m
1	18	male	Finished stimuli\mo_fear_upeyes.jpg	mo	fear	yes	yes	0	172	-1	7	m	z
1	18	male	Finished stimuli\pefear_upeyes.jpg	pe	fear	yes	yes	1	183	-1	7	m	m
1	18	male	Finished stimuli\pf_hap_jumbledeye.jpg	pf	happy	no	yes	1	202	-1	6	m	m
1	18	male	Finished stimuli\JJhappyupeyes.jpg	JJ	happy	yes	yes	1	244	-1	7	m	m
1	18	male	Finished stimuli\jjfear_jumbledeyes.jpg	jj	fear	no	yes	1	340	-1	6	m	m
1	18	male	Finished stimuli\rfear_up_noeys.jpg	rf	fear	yes	no	0	369	-1	7	z	m
1	18	male	Finished stimuli\em_fear_noeyes.jpg	em	fear	yes	no	1	205	-1	7	z	z
1	18	male	Finished stimuli\pehappy_noeyes.jpg	pe	happy	yes	no	1	360	-1	7	z	z
1	18	male	Finished stimuli\em_hap_jumbledeyes.jpg	em	happy	no	yes	1	228	-1	7	m	m
1	18	male	Finished stimuli\jjfear_upeyes.jpg	jj	fear	yes	yes	1	204	-1	6	m	m
1	18	male	Finished stimuli\pf_fear_upeyes.jpg	pf	fear	yes	yes	1	319	-1	7	m	m
1	18	male	Finished stimuli\JJhappyjumblednoeyes.jpg	JJ	happy	no	no	1	291	-1	7	z	z
1	18	male	Finished stimuli\em_hap_noeyes.jpg	em	happy	yes	no	1	347	-1	7	z	z
1	18	male	Finished stimuli\sw_fear_jumbled_noeyes.jpg	sw	fear	no	no	0	103	-1	6	z	m
1	18	male	Finished stimuli\sw_hap_upeyes.jpg	sw	happy	yes	yes	1	182	-1	7	m	m
1	18	male	Finished stimuli\wf_hap_jumbled_noeyes.jpg	wf	happy	no	no	0	241	-1	7	z	m
1	18	male	Finished stimuli\wf_fea_jumbled_eyes.jpg	wf	fear	no	yes	1	186	-1	7	m	m
1	18	male	Finished stimuli\sw_fear_noeyes.jpg	sw	fear	yes	no	0	173	-1	6	z	m
1	18	male	Finished stimuli\cc_happy_upnoeyes.jpg	cc	happy	yes	no	1	425	-1	7	z	z
1	18	male	Finished stimuli\cc_fear_noeyes.jpg	cc	fear	yes	no	1	307	-1	7	z	z
1	18	male	Finished stimuli\pehappy_jumbled_eyes.jpg	pe	happy	no	yes	0	410	-1	7	m	z
1	18	male	Finished stimuli\mo_hap_jumblednoeyes.jpg	mo	happy	no	no	1	260	-1	7	z	z
1	18	male	Finished stimuli\pf_fear_up_noeyes.jpg	pf	fear	yes	no	1	268	-1	7	z	z
1	18	male	Finished stimuli\jjfear_upnoeyes.jpg	jj	fear	yes	no	1	287	-1	7	z	z
1	18	male	Finished stimuli\rfear_up_noeys.jpg	rf	fear	yes	no	0	294	-1	6	z	m
1	18	male	Finished stimuli\pf_fear_jumbledeyes.jpg	pf	fear	no	yes	1	220	-1	7	m	m
1	18	male	Finished stimuli\em_hap_jumbledeyes.jpg	em	happy	no	yes	1	262	-1	7	m	m
1	18	male	Finished stimuli\sw_hap_noeyes.jpg	sw	happy	yes	no	0	182	-1	6	z	m
1	18	male	Finished stimuli\mo_fear_upeyes.jpg	mo	fear	yes	yes	1	193	-1	7	m	m
1	18	male	Finished stimuli\cc_fear_noeyes.jpg	cc	fear	yes	no	1	315	-1	6	z	z
1	18	male	Finished stimuli\mo_hap_up_noeyes.jpg	mo	happy	yes	no	1	225	-1	6	z	z
1	18	male	Finished stimuli\sw_hap_jumbled_noeyes.jpg	sw	happy	no	no	1	273	-1	7	z	z
1	18	male	Finished stimuli\JJhappyjumblednoeyes.jpg	JJ	happy	no	no	1	241	-1	6	z	z
1	18	male	Finished stimuli\mf_fear_jumbledeye.jpg	mf	fear	no	yes	1	186	-1	7	m	m
1	18	male	Finished stimuli\em_hap_jumblednoeyes.jpg	em	happy	no	no	1	261	-1	7	z	z
1	18	male	Finished stimuli\em_fear_noeyes.jpg	em	fear	yes	no	1	253	-1	7	z	z
1	18	male	Finished stimuli\pf_hap_jumbledeye.jpg	pf	happy	no	yes	1	205	-1	6	m	m
1	18	male	Finished stimuli\mf_happy_jumbledeyes.jpg	mf	happy	no	yes	1	368	-1	7	m	m
1	18	male	Finished stimuli\mf_happy_upeyes.jpg	mf	happy	yes	yes	1	251	-1	7	m	m
1	18	male	Finished stimuli\JJhappyupnoeyes.jpg	JJ	happy	yes	no	0	532	-1	6	z	m
1	18	male	Finished stimuli\wf_fea_jumbled_noeyes.jpg	wf	fear	no	no	0	320	-1	7	z	m
1	18	male	Finished stimuli\cc_happy_jumblednoeyes.jpg	cc	happy	no	no	0	326	-1	6	z	m
1	18	male	Finished stimuli\wf_fea_up eyes.jpg	wf	fear	yes	yes	1	195	-1	7	m	m
1	18	male	Finished stimuli\mo_fear_jumblednoeyes.jpg	mo	fear	no	no	1	302	-1	7	z	z
1	18	male	Finished stimuli\sw_fear_upeyes.jpg	sw	fear	yes	yes	1	236	-1	7	m	m
1	18	male	Finished stimuli\rfear_jumbledeyess.jpg	rf	fear	no	yes	1	229	-1	7	m	m
1	18	male	Finished stimuli\mo_hap_upeyes.jpg	mo	happy	yes	yes	1	174	-1	6	m	m
1	18	male	Finished stimuli\sw_fear_noeyes.jpg	sw	fear	yes	no	0	162	-1	7	z	m
1	18	male	Finished stimuli\pehappy_noeyes.jpg	pe	happy	yes	no	1	221	-1	7	z	z
1	18	male	Finished stimuli\jjfear_upeyes.jpg	jj	fear	yes	yes	1	167	-1	7	m	m
1	18	male	Finished stimuli\pf_hap_jumbled_noeye.jpg	pf	happy	no	no	0	402	-1	7	z	m
1	18	male	Finished stimuli\wf_hap_up_noeyes.jpg	wf	happy	yes	no	1	349	-1	6	z	z
1	18	male	Finished stimuli\mo_fear_jumbledeyes.jpg	mo	fear	no	yes	1	218	-1	7	m	m
1	18	male	Finished stimuli\pefear_up_jumbledeyes.jpg	pe	fear	no	yes	1	179	-1	7	m	m
1	18	male	Finished stimuli\pefear_upeyes.jpg	pe	fear	yes	yes	1	182	-1	7	m	m
1	18	male	Finished stimuli\rhap_jumbledeyes.jpg	rh	happy	no	yes	1	208	-1	7	m	m
1	18	male	Finished stimuli\em_fear_jumbledeyes.jpg	em	fear	no	yes	1	171	-1	7	m	m
1	18	male	Finished stimuli\wf_hap_jumbledeyes.jpg	wf	happy	no	yes	1	222	-1	7	m	m
1	18	male	Finished stimuli\mf_fear_jumblednoeye.jpg	mf	fear	no	no	1	304	-1	7	z	z
1	18	male	Finished stimuli\cc_happy_upeyes.jpg	cc	happy	yes	yes	1	214	-1	6	m	m
1	18	male	Finished stimuli\sw_hap_upeyes.jpg	sw	happy	yes	yes	1	192	-1	6	m	m
1	18	male	Finished stimuli\pefear_up_noeyes.jpg	pe	fear	yes	no	1	362	-1	6	z	z
1	18	male	Finished stimuli\wf_fea_jumbled_eyes.jpg	wf	fear	no	yes	1	182	-1	6	m	m
1	18	male	Finished stimuli\cc_happy_jumbledeyes.jpg	cc	happy	no	yes	1	193	-1	6	m	m
1	18	male	Finished stimuli\pehappy_upeyes.jpg	pe	happy	yes	yes	1	172	-1	7	m	m
1	18	male	Finished stimuli\mf_happy_jumbled_noeyes.jpg	mf	happy	no	no	0	183	-1	7	z	m
1	18	male	Finished stimuli\em_hap_noeyes.jpg	em	happy	yes	no	1	235	-1	7	z	z
1	18	male	Finished stimuli\rhap_noeyes.jpg	rh	happy	yes	no	1	236	-1	7	z	z
1	18	male	Finished stimuli\em_hap_upeyes.jpg	em	happy	yes	yes	1	173	-1	7	m	m
1	18	male	Finished stimuli\sw_hap_jumbledeyes.jpg	sw	happy	no	yes	1	209	-1	7	m	m
1	18	male	Finished stimuli\mo_fear_upnoeyes.jpg	mo	fear	yes	no	0	171	-1	6	z	m
1	18	male	Finished stimuli\pf_fear_jumbled_noeyes.jpg	pf	fear	no	no	0	119	-1	7	z	m
1	18	male	Finished stimuli\pehappy_jumbled_no_eyes.jpg	pe	happy	no	no	0	237	-1	7	z	m
1	18	male	Finished stimuli\cc_fearjumbledno_eye.jpg	cc	fear	no	no	1	157	-1	6	z	z
1	18	male	Finished stimuli\sw_fear_jumbled_eyes.jpg	sw	fear	no	yes	1	250	-1	7	m	m
1	18	male	Finished stimuli\pf_hap_up_noeye.jpg	pf	happy	yes	no	0	170	-1	6	z	m
1	18	male	Finished stimuli\mf_happy_upno_eyes.jpg	mf	happy	yes	no	1	165	-1	6	z	z
1	18	male	Finished stimuli\mo_hap_jumbledeyes.jpg	mo	happy	no	yes	1	249	-1	6	m	m
1	18	male	Finished stimuli\jjfear_jumbledeyes.jpg	jj	fear	no	yes	1	209	-1	7	m	m
1	18	male	Finished stimuli\JJhappyupeyes.jpg	JJ	happy	yes	yes	1	339	-1	7	m	m
1	18	male	Finished stimuli\wf_hap_upeyes.jpg	wf	happy	yes	yes	1	232	-1	7	m	m
1	18	male	Finished stimuli\wf_hap_jumbled_noeyes.jpg	wf	happy	no	no	1	305	-1	6	z	z
1	18	male	Finished stimuli\wf_fea_up_noeyes.jpg	wf	fear	yes	no	0	190	-1	7	z	m
1	18	male	Finished stimuli\mf_fear_upeye.jpg	mf	fear	yes	yes	1	179	-1	6	m	m
1	18	male	Finished stimuli\rfear_upeys.jpg	rf	fear	yes	yes	1	206	-1	7	m	m
1	18	male	Finished stimuli\jjhap_jumbledeyes.jpg	jj	happy	no	yes	1	287	-1	7	m	m
1	18	male	Finished stimuli\jjfear_jumblednoeyes.jpg	jj	fear	no	no	0	406	-1	6	z	m
1	18	male	Finished stimuli\cc_fear_up.jpg	cc	fear	yes	yes	1	207	-1	6	m	m
1	18	male	Finished stimuli\rhap.jpg	rh	happy	yes	yes	1	201	-1	6	m	m
1	18	male	Finished stimuli\mf_fear_up_noeye.jpg	mf	fear	yes	no	1	243	-1	7	z	z
1	18	male	Finished stimuli\pefear_up_jumbled_noeyes.jpg	pe	fear	no	no	0	203	-1	7	z	m
1	18	male	Finished stimuli\pf_hap_upeye.jpg	pf	happy	yes	yes	1	230	-1	7	m	m
1	18	male	Finished stimuli\rhap_jumbled_noeyes.jpg	rh	happy	no	no	1	223	-1	6	z	z
1	18	male	Finished stimuli\pf_fear_upeyes.jpg	pf	fear	yes	yes	1	248	-1	6	m	m
1	18	male	Finished stimuli\em_fear_jumblednoeyes.jpg	em	fear	no	no	1	241	-1	7	z	z
1	18	male	Finished stimuli\em_fear_upeyes.jpg	em	fear	yes	yes	1	284	-1	7	m	m
1	18	male	Finished stimuli\cc_fear_jumbledeyes.jpg	cc	fear	no	yes	1	271	-1	7	m	m
1	18	male	Finished stimuli\cc_happy_upnoeyes.jpg	cc	happy	yes	no	1	331	-1	7	z	z
1	18	male	Finished stimuli\sw_fear_jumbled_noeyes.jpg	sw	fear	no	no	0	236	-1	7	z	m
1	18	male	Finished stimuli\rfear_jumbled_noeyess.jpg	rf	fear	no	no	0	161	-1	7	z	m
1	18	male	Finished stimuli\rhap_noeyes.jpg	rh	happy	yes	no	1	949	-1	6	z	z
1	18	male	Finished stimuli\pf_fear_jumbledeyes.jpg	pf	fear	no	yes	1	326	-1	7	m	m
1	18	male	Finished stimuli\jjfear_upnoeyes.jpg	jj	fear	yes	no	0	775	-1	7	z	m
1	18	male	Finished stimuli\mo_fear_jumbledeyes.jpg	mo	fear	no	yes	1	255	-1	6	m	m
1	18	male	Finished stimuli\mo_hap_jumbledeyes.jpg	mo	happy	no	yes	1	227	-1	7	m	m
1	18	male	Finished stimuli\pf_fear_jumbled_noeyes.jpg	pf	fear	no	no	0	328	-1	7	z	m
1	18	male	Finished stimuli\mo_fear_upnoeyes.jpg	mo	fear	yes	no	1	247	-1	7	z	z
1	18	male	Finished stimuli\mf_happy_jumbled_noeyes.jpg	mf	happy	no	no	1	263	-1	7	z	z
1	18	male	Finished stimuli\sw_fear_noeyes.jpg	sw	fear	yes	no	1	310	-1	7	z	z
1	18	male	Finished stimuli\jjhap_jumbledeyes.jpg	jj	happy	no	yes	1	140	-1	7	m	m
1	18	male	Finished stimuli\wf_fea_jumbled_eyes.jpg	wf	fear	no	yes	1	193	-1	7	m	m
1	18	male	Finished stimuli\pefear_up_noeyes.jpg	pe	fear	yes	no	1	243	-1	7	z	z
1	18	male	Finished stimuli\rfear_up_noeys.jpg	rf	fear	yes	no	0	227	-1	6	z	m
1	18	male	Finished stimuli\cc_fear_jumbledeyes.jpg	cc	fear	no	yes	1	204	-1	6	m	m
1	18	male	Finished stimuli\pefear_up_jumbled_noeyes.jpg	pe	fear	no	no	0	207	-1	7	z	m
1	18	male	Finished stimuli\sw_hap_jumbledeyes.jpg	sw	happy	no	yes	0	128	-1	7	m	z
1	18	male	Finished stimuli\pehappy_noeyes.jpg	pe	happy	yes	no	0	205	-1	7	z	m
1	18	male	Finished stimuli\sw_hap_noeyes.jpg	sw	happy	yes	no	0	199	-1	7	z	m
1	18	male	Finished stimuli\JJhappyjumblednoeyes.jpg	JJ	happy	no	no	0	202	-1	7	z	m
1	18	male	Finished stimuli\wf_fea_up eyes.jpg	wf	fear	yes	yes	1	276	-1	7	m	m
1	18	male	Finished stimuli\mo_fear_upeyes.jpg	mo	fear	yes	yes	1	266	-1	7	m	m
1	18	male	Finished stimuli\JJhappyupnoeyes.jpg	JJ	happy	yes	no	1	169	-1	6	z	z
1	18	male	Finished stimuli\em_hap_noeyes.jpg	em	happy	yes	no	1	324	-1	6	z	z
1	18	male	Finished stimuli\mo_fear_jumblednoeyes.jpg	mo	fear	no	no	1	282	-1	6	z	z
1	18	male	Finished stimuli\rhap.jpg	rh	happy	yes	yes	1	145	-1	6	m	m
1	18	male	Finished stimuli\mo_hap_jumblednoeyes.jpg	mo	happy	no	no	1	214	-1	7	z	z
1	18	male	Finished stimuli\cc_fear_noeyes.jpg	cc	fear	yes	no	1	159	-1	7	z	z
1	18	male	Finished stimuli\sw_fear_jumbled_noeyes.jpg	sw	fear	no	no	1	243	-1	6	z	z
1	18	male	Finished stimuli\em_fear_jumblednoeyes.jpg	em	fear	no	no	1	316	-1	7	z	z
1	18	male	Finished stimuli\em_hap_jumblednoeyes.jpg	em	happy	no	no	1	257	-1	7	z	z
1	18	male	Finished stimuli\pf_fear_up_noeyes.jpg	pf	fear	yes	no	0	233	-1	7	z	m
1	18	male	Finished stimuli\jjfear_jumbledeyes.jpg	jj	fear	no	yes	1	202	-1	7	m	m
1	18	male	Finished stimuli\jjfear_jumblednoeyes.jpg	jj	fear	no	no	1	301	-1	6	z	z
1	18	male	Finished stimuli\cc_happy_upnoeyes.jpg	cc	happy	yes	no	0	243	-1	7	z	m
1	18	male	Finished stimuli\sw_fear_jumbled_eyes.jpg	sw	fear	no	yes	1	363	-1	7	m	m
1	18	male	Finished stimuli\wf_hap_upeyes.jpg	wf	happy	yes	yes	1	247	-1	6	m	m
1	18	male	Finished stimuli\em_hap_upeyes.jpg	em	happy	yes	yes	1	256	-1	7	m	m
1	18	male	Finished stimuli\pefear_upeyes.jpg	pe	fear	yes	yes	1	216	-1	6	m	m
1	18	male	Finished stimuli\wf_fea_jumbled_noeyes.jpg	wf	fear	no	no	1	274	-1	6	z	z
1	18	male	Finished stimuli\pehappy_jumbled_no_eyes.jpg	pe	happy	no	no	0	290	-1	7	z	m
1	18	male	Finished stimuli\rhap_jumbled_noeyes.jpg	rh	happy	no	no	0	376	-1	6	z	m
1	18	male	Finished stimuli\sw_fear_upeyes.jpg	sw	fear	yes	yes	1	219	-1	6	m	m
1	18	male	Finished stimuli\pf_hap_upeye.jpg	pf	happy	yes	yes	1	253	-1	6	m	m
1	18	male	Finished stimuli\jjfear_upeyes.jpg	jj	fear	yes	yes	1	213	-1	7	m	m
1	18	male	Finished stimuli\wf_hap_jumbledeyes.jpg	wf	happy	no	yes	1	271	-1	7	m	m
1	18	male	Finished stimuli\pehappy_upeyes.jpg	pe	happy	yes	yes	1	239	-1	6	m	m
1	18	male	Finished stimuli\pf_hap_jumbled_noeye.jpg	pf	happy	no	no	1	184	-1	7	z	z
1	18	male	Finished stimuli\rfear_jumbledeyess.jpg	rf	fear	no	yes	1	291	-1	7	m	m
1	18	male	Finished stimuli\rhap_jumbledeyes.jpg	rh	happy	no	yes	1	258	-1	6	m	m
1	18	male	Finished stimuli\em_fear_noeyes.jpg	em	fear	yes	no	1	1041	-1	6	z	z
1	18	male	Finished stimuli\mf_happy_upeyes.jpg	mf	happy	yes	yes	1	209	-1	6	m	m
1	18	male	Finished stimuli\mf_fear_jumblednoeye.jpg	mf	fear	no	no	0	202	-1	7	z	m
1	18	male	Finished stimuli\mo_hap_upeyes.jpg	mo	happy	yes	yes	1	221	-1	7	m	m
1	18	male	Finished stimuli\em_hap_jumbledeyes.jpg	em	happy	no	yes	1	255	-1	7	m	m
1	18	male	Finished stimuli\sw_hap_upeyes.jpg	sw	happy	yes	yes	1	167	-1	6	m	m
1	18	male	Finished stimuli\cc_happy_upeyes.jpg	cc	happy	yes	yes	1	211	-1	6	m	m
1	18	male	Finished stimuli\rfear_jumbled_noeyess.jpg	rf	fear	no	no	1	325	-1	7	z	z
1	18	male	Finished stimuli\pf_hap_up_noeye.jpg	pf	happy	yes	no	0	147	-1	7	z	m
1	18	male	Finished stimuli\wf_hap_up_noeyes.jpg	wf	happy	yes	no	0	135	-1	6	z	m
1	18	male	Finished stimuli\wf_hap_jumbled_noeyes.jpg	wf	happy	no	no	0	196	-1	6	z	m
1	18	male	Finished stimuli\em_fear_upeyes.jpg	em	fear	yes	yes	1	175	-1	7	m	m
1	18	male	Finished stimuli\wf_fea_up_noeyes.jpg	wf	fear	yes	no	0	225	-1	7	z	m
1	18	male	Finished stimuli\mo_hap_up_noeyes.jpg	mo	happy	yes	no	0	330	-1	6	z	m
1	18	male	Finished stimuli\pf_fear_upeyes.jpg	pf	fear	yes	yes	0	127	-1	6	m	z
1	18	male	Finished stimuli\pehappy_jumbled_eyes.jpg	pe	happy	no	yes	1	156	-1	6	m	m
1	18	male	Finished stimuli\mf_fear_jumbledeye.jpg	mf	fear	no	yes	1	160	-1	6	m	m
1	18	male	Finished stimuli\mf_fear_upeye.jpg	mf	fear	yes	yes	1	155	-1	6	m	m
1	18	male	Finished stimuli\mf_happy_upno_eyes.jpg	mf	happy	yes	no	0	327	-1	6	z	m
1	18	male	Finished stimuli\rfear_upeys.jpg	rf	fear	yes	yes	1	188	-1	6	m	m
1	18	male	Finished stimuli\mf_fear_up_noeye.jpg	mf	fear	yes	no	1	279	-1	6	z	z
1	18	male	Finished stimuli\cc_happy_jumblednoeyes.jpg	cc	happy	no	no	1	390	-1	7	z	z
1	18	male	Finished stimuli\pf_hap_jumbledeye.jpg	pf	happy	no	yes	1	186	-1	7	m	m
1	18	male	Finished stimuli\mf_happy_jumbledeyes.jpg	mf	happy	no	yes	1	164	-1	6	m	m
1	18	male	Finished stimuli\cc_happy_jumbledeyes.jpg	cc	happy	no	yes	1	184	-1	7	m	m
1	18	male	Finished stimuli\sw_hap_jumbled_noeyes.jpg	sw	happy	no	no	0	570	-1	7	z	m
1	18	male	Finished stimuli\em_fear_jumbledeyes.jpg	em	fear	no	yes	1	190	-1	7	m	m
1	18	male	Finished stimuli\JJhappyupeyes.jpg	JJ	happy	yes	yes	1	169	-1	7	m	m
1	18	male	Finished stimuli\cc_fear_up.jpg	cc	fear	yes	yes	1	141	-1	7	m	m
1	18	male	Finished stimuli\cc_fearjumbledno_eye.jpg	cc	fear	no	no	0	170	-1	7	z	m
1	18	male	Finished stimuli\pefear_up_jumbledeyes.jpg	pe	fear	no	yes	1	117	-1	7	m	m
3	19	female	Finished stimuli\mf_fear_jumbledeye.jpg	mf	fear	no	yes	1	588	-1	6	m	m
3	19	female	Finished stimuli\jjhap_jumbledeyes.jpg	jj	happy	no	yes	1	347	-1	7	m	m
3	19	female	Finished stimuli\jjfear_jumblednoeyes.jpg	jj	fear	no	no	1	364	-1	6	z	z
3	19	female	Finished stimuli\cc_fearjumbledno_eye.jpg	cc	fear	no	no	1	299	-1	7	z	z
3	19	female	Finished stimuli\pf_hap_up_noeye.jpg	pf	happy	yes	no	0	422	-1	7	z	m
3	19	female	Finished stimuli\pefear_up_noeyes.jpg	pe	fear	yes	no	1	315	-1	7	z	z
3	19	female	Finished stimuli\pehappy_upeyes.jpg	pe	happy	yes	yes	1	333	-1	6	m	m
3	19	female	Finished stimuli\sw_fear_noeyes.jpg	sw	fear	yes	no	0	294	-1	7	z	m
3	19	female	Finished stimuli\pefear_up_jumbled_noeyes.jpg	pe	fear	no	no	0	469	-1	7	z	m
3	19	female	Finished stimuli\mf_happy_upno_eyes.jpg	mf	happy	yes	no	1	285	-1	7	z	z
3	19	female	Finished stimuli\wf_fea_jumbled_eyes.jpg	wf	fear	no	yes	0	428	-1	6	m	z
3	19	female	Finished stimuli\JJhappyupeyes.jpg	JJ	happy	yes	yes	1	453	-1	6	m	m
3	19	female	Finished stimuli\cc_fear_jumbledeyes.jpg	cc	fear	no	yes	1	302	-1	7	m	m
3	19	female	Finished stimuli\em_hap_upeyes.jpg	em	happy	yes	yes	1	284	-1	6	m	m
3	19	female	Finished stimuli\jjfear_jumbledeyes.jpg	jj	fear	no	yes	1	275	-1	7	m	m
3	19	female	Finished stimuli\rfear_jumbledeyess.jpg	rf	fear	no	yes	1	355	-1	7	m	m
3	19	female	Finished stimuli\sw_fear_jumbled_noeyes.jpg	sw	fear	no	no	0	231	-1	6	z	m
3	19	female	Finished stimuli\rhap.jpg	rh	happy	yes	yes	1	216	-1	6	m	m
3	19	female	Finished stimuli\jjfear_upeyes.jpg	jj	fear	yes	yes	1	162	-1	6	m	m
3	19	female	Finished stimuli\sw_fear_jumbled_eyes.jpg	sw	fear	no	yes	1	262	-1	7	m	m
3	19	female	Finished stimuli\JJhappyupnoeyes.jpg	JJ	happy	yes	no	0	164	-1	7	z	m
3	19	female	Finished stimuli\sw_hap_jumbledeyes.jpg	sw	happy	no	yes	1	264	-1	6	m	m
3	19	female	Finished stimuli\mf_happy_jumbledeyes.jpg	mf	happy	no	yes	1	151	-1	7	m	m
3	19	female	Finished stimuli\rhap_noeyes.jpg	rh	happy	yes	no	0	148	-1	7	z	m
3	19	female	Finished stimuli\wf_fea_jumbled_noeyes.jpg	wf	fear	no	no	1	400	-1	6	z	z
3	19	female	Finished stimuli\mo_fear_upnoeyes.jpg	mo	fear	yes	no	0	619	-1	7	z	m
3	19	female	Finished stimuli\sw_fear_upeyes.jpg	sw	fear	yes	yes	1	509	-1	7	m	m
3	19	female	Finished stimuli\mo_hap_upeyes.jpg	mo	happy	yes	yes	1	267	-1	7	m	m
3	19	female	Finished stimuli\mf_fear_up_noeye.jpg	mf	fear	yes	no	1	401	-1	7	z	z
3	19	female	Finished stimuli\pf_fear_up_noeyes.jpg	pf	fear	yes	no	1	499	-1	7	z	z
3	19	female	Finished stimuli\cc_fear_up.jpg	cc	fear	yes	yes	1	346	-1	6	m	m
3	19	female	Finished stimuli\wf_fea_up eyes.jpg	wf	fear	yes	yes	1	367	-1	7	m	m
3	19	female	Finished stimuli\rfear_upeys.jpg	rf	fear	yes	yes	1	506	-1	7	m	m
3	19	female	Finished stimuli\mo_fear_upeyes.jpg	mo	fear	yes	yes	1	313	-1	6	m	m
3	19	female	Finished stimuli\pefear_up_jumbledeyes.jpg	pe	fear	no	yes	1	207	-1	7	m	m
3	19	female	Finished stimuli\em_hap_jumblednoeyes.jpg	em	happy	no	no	1	385	-1	7	z	z
3	19	female	Finished stimuli\em_fear_jumbledeyes.jpg	em	fear	no	yes	1	405	-1	7	m	m
3	19	female	Finished stimuli\cc_fear_noeyes.jpg	cc	fear	yes	no	1	263	-1	6	z	z
3	19	female	Finished stimuli\em_hap_jumbledeyes.jpg	em	happy	no	yes	0	391	-1	6	m	z
3	19	female	Finished stimuli\mf_happy_upeyes.jpg	mf	happy	yes	yes	1	273	-1	7	m	m
3	19	female	Finished stimuli\cc_happy_jumblednoeyes.jpg	cc	happy	no	no	1	273	-1	7	z	z
3	19	female	Finished stimuli\sw_hap_jumbled_noeyes.jpg	sw	happy	no	no	1	272	-1	7	z	z
3	19	female	Finished stimuli\em_fear_jumblednoeyes.jpg	em	fear	no	no	1	208	-1	7	z	z
3	19	female	Finished stimuli\pf_fear_upeyes.jpg	pf	fear	yes	yes	1	418	-1	6	m	m
3	19	female	Finished stimuli\pf_hap_jumbledeye.jpg	pf	happy	no	yes	0	900	-1	6	m	z
3	19	female	Finished stimuli\em_hap_noeyes.jpg	em	happy	yes	no	1	387	-1	7	z	z
3	19	female	Finished stimuli\cc_happy_upnoeyes.jpg	cc	happy	yes	no	1	326	-1	6	z	z
3	19	female	Finished stimuli\wf_hap_jumbledeyes.jpg	wf	happy	no	yes	0	314	-1	6	m	z
3	19	female	Finished stimuli\pehappy_jumbled_eyes.jpg	pe	happy	no	yes	1	232	-1	6	m	m
3	19	female	Finished stimuli\rhap_jumbledeyes.jpg	rh	happy	no	yes	0	473	-1	6	m	z
3	19	female	Finished stimuli\mo_hap_up_noeyes.jpg	mo	happy	yes	no	1	433	-1	6	z	z
3	19	female	Finished stimuli\rhap_jumbled_noeyes.jpg	rh	happy	no	no	1	274	-1	7	z	z
3	19	female	Finished stimuli\mf_fear_upeye.jpg	mf	fear	yes	yes	1	313	-1	7	m	m
3	19	female	Finished stimuli\mo_fear_jumbledeyes.jpg	mo	fear	no	yes	1	335	-1	7	m	m
3	19	female	Finished stimuli\em_fear_upeyes.jpg	em	fear	yes	yes	1	212	-1	7	m	m
3	19	female	Finished stimuli\pf_hap_jumbled_noeye.jpg	pf	happy	no	no	0	310	-1	7	z	m
3	19	female	Finished stimuli\sw_hap_noeyes.jpg	sw	happy	yes	no	0	267	-1	7	z	m
3	19	female	Finished stimuli\cc_happy_jumbledeyes.jpg	cc	happy	no	yes	1	139	-1	7	m	m
3	19	female	Finished stimuli\em_fear_noeyes.jpg	em	fear	yes	no	0	536	-1	7	z	m
3	19	female	Finished stimuli\JJhappyjumblednoeyes.jpg	JJ	happy	no	no	1	566	-1	7	z	z
3	19	female	Finished stimuli\wf_hap_up_noeyes.jpg	wf	happy	yes	no	0	530	-1	7	z	m
3	19	female	Finished stimuli\pf_hap_upeye.jpg	pf	happy	yes	yes	1	287	-1	6	m	m
3	19	female	Finished stimuli\sw_hap_upeyes.jpg	sw	happy	yes	yes	1	198	-1	6	m	m
3	19	female	Finished stimuli\wf_hap_upeyes.jpg	wf	happy	yes	yes	1	209	-1	7	m	m
3	19	female	Finished stimuli\pf_fear_jumbledeyes.jpg	pf	fear	no	yes	0	146	-1	7	m	z
3	19	female	Finished stimuli\mo_hap_jumbledeyes.jpg	mo	happy	no	yes	1	295	-1	7	m	m
3	19	female	Finished stimuli\wf_fea_up_noeyes.jpg	wf	fear	yes	no	0	333	-1	7	z	m
3	19	female	Finished stimuli\cc_happy_upeyes.jpg	cc	happy	yes	yes	1	354	-1	7	m	m
3	19	female	Finished stimuli\pf_fear_jumbled_noeyes.jpg	pf	fear	no	no	1	566	-1	6	z	z
3	19	female	Finished stimuli\wf_hap_jumbled_noeyes.jpg	wf	happy	no	no	1	314	-1	6	z	z
3	19	female	Finished stimuli\rfear_up_noeys.jpg	rf	fear	yes	no	0	336	-1	7	z	m
3	19	female	Finished stimuli\mf_fear_jumblednoeye.jpg	mf	fear	no	no	0	268	-1	7	z	m
3	19	female	Finished stimuli\mf_happy_jumbled_noeyes.jpg	mf	happy	no	no	1	332	-1	7	z	z
3	19	female	Finished stimuli\mo_fear_jumblednoeyes.jpg	mo	fear	no	no	1	281	-1	7	z	z
3	19	female	Finished stimuli\pefear_upeyes.jpg	pe	fear	yes	yes	0	328	-1	6	m	z
3	19	female	Finished stimuli\pehappy_jumbled_no_eyes.jpg	pe	happy	no	no	1	261	-1	6	z	z
3	19	female	Finished stimuli\jjfear_upnoeyes.jpg	jj	fear	yes	no	0	309	-1	6	z	m
3	19	female	Finished stimuli\mo_hap_jumblednoeyes.jpg	mo	happy	no	no	1	243	-1	7	z	z
3	19	female	Finished stimuli\pehappy_noeyes.jpg	pe	happy	yes	no	1	587	-1	7	z	z
3	19	female	Finished stimuli\rfear_jumbled_noeyess.jpg	rf	fear	no	no	1	279	-1	7	z	z
3	19	female	Finished stimuli\cc_happy_upeyes.jpg	cc	happy	yes	yes	1	209	-1	7	m	m
3	19	female	Finished stimuli\mf_happy_jumbled_noeyes.jpg	mf	happy	no	no	1	411	-1	7	z	z
3	19	female	Finished stimuli\em_fear_jumblednoeyes.jpg	em	fear	no	no	1	700	-1	7	z	z
3	19	female	Finished stimuli\mf_fear_up_noeye.jpg	mf	fear	yes	no	1	218	-1	7	z	z
3	19	female	Finished stimuli\mo_hap_jumblednoeyes.jpg	mo	happy	no	no	1	332	-1	7	z	z
3	19	female	Finished stimuli\rfear_upeys.jpg	rf	fear	yes	yes	1	417	-1	7	m	m
3	19	female	Finished stimuli\jjfear_upeyes.jpg	jj	fear	yes	yes	1	403	-1	7	m	m
3	19	female	Finished stimuli\pehappy_noeyes.jpg	pe	happy	yes	no	0	694	-1	6	z	m
3	19	female	Finished stimuli\pf_fear_jumbled_noeyes.jpg	pf	fear	no	no	1	421	-1	7	z	z
3	19	female	Finished stimuli\em_hap_jumbledeyes.jpg	em	happy	no	yes	0	382	-1	7	m	z
3	19	female	Finished stimuli\rhap_jumbled_noeyes.jpg	rh	happy	no	no	1	898	-1	7	z	z
3	19	female	Finished stimuli\pehappy_jumbled_no_eyes.jpg	pe	happy	no	no	1	384	-1	7	z	z
3	19	female	Finished stimuli\wf_fea_jumbled_eyes.jpg	wf	fear	no	yes	1	460	-1	7	m	m
3	19	female	Finished stimuli\cc_happy_upnoeyes.jpg	cc	happy	yes	no	1	348	-1	7	z	z
3	19	female	Finished stimuli\pefear_up_jumbled_noeyes.jpg	pe	fear	no	no	0	360	-1	6	z	m
3	19	female	Finished stimuli\JJhappyupnoeyes.jpg	JJ	happy	yes	no	0	419	-1	7	z	m
3	19	female	Finished stimuli\rhap_noeyes.jpg	rh	happy	yes	no	0	301	-1	7	z	m
3	19	female	Finished stimuli\sw_hap_jumbledeyes.jpg	sw	happy	no	yes	1	185	-1	7	m	m
3	19	female	Finished stimuli\jjhap_jumbledeyes.jpg	jj	happy	no	yes	1	308	-1	7	m	m
3	19	female	Finished stimuli\cc_fear_noeyes.jpg	cc	fear	yes	no	0	210	-1	7	z	m
3	19	female	Finished stimuli\sw_hap_jumbled_noeyes.jpg	sw	happy	no	no	1	291	-1	7	z	z
3	19	female	Finished stimuli\JJhappyupeyes.jpg	JJ	happy	yes	yes	0	234	-1	6	m	z
3	19	female	Finished stimuli\sw_fear_noeyes.jpg	sw	fear	yes	no	0	211	-1	6	z	m
3	19	female	Finished stimuli\cc_happy_jumblednoeyes.jpg	cc	happy	no	no	0	325	-1	6	z	m
3	19	female	Finished stimuli\wf_hap_upeyes.jpg	wf	happy	yes	yes	1	202	-1	6	m	m
3	19	female	Finished stimuli\sw_fear_jumbled_noeyes.jpg	sw	fear	no	no	0	197	-1	7	z	m
3	19	female	Finished stimuli\mf_happy_upno_eyes.jpg	mf	happy	yes	no	1	478	-1	7	z	z
3	19	female	Finished stimuli\mf_fear_jumbledeye.jpg	mf	fear	no	yes	1	405	-1	6	m	m
3	19	female	Finished stimuli\jjfear_upnoeyes.jpg	jj	fear	yes	no	0	216	-1	7	z	m
3	19	female	Finished stimuli\mf_happy_jumbledeyes.jpg	mf	happy	no	yes	1	201	-1	7	m	m
3	19	female	Finished stimuli\wf_hap_jumbledeyes.jpg	wf	happy	no	yes	1	459	-1	6	m	m
3	19	female	Finished stimuli\wf_hap_up_noeyes.jpg	wf	happy	yes	no	0	267	-1	6	z	m
3	19	female	Finished stimuli\cc_fear_up.jpg	cc	fear	yes	yes	1	323	-1	6	m	m
3	19	female	Finished stimuli\rfear_jumbled_noeyess.jpg	rf	fear	no	no	1	305	-1	7	z	z
3	19	female	Finished stimuli\sw_hap_upeyes.jpg	sw	happy	yes	yes	1	223	-1	7	m	m
3	19	female	Finished stimuli\rhap.jpg	rh	happy	yes	yes	1	232	-1	7	m	m
3	19	female	Finished stimuli\mf_happy_upeyes.jpg	mf	happy	yes	yes	1	368	-1	6	m	m
3	19	female	Finished stimuli\mo_fear_upeyes.jpg	mo	fear	yes	yes	1	220	-1	7	m	m
3	19	female	Finished stimuli\mo_hap_up_noeyes.jpg	mo	happy	yes	no	0	518	-1	7	z	m
3	19	female	Finished stimuli\pehappy_upeyes.jpg	pe	happy	yes	yes	1	124	-1	7	m	m
3	19	female	Finished stimuli\wf_fea_up_noeyes.jpg	wf	fear	yes	no	0	233	-1	7	z	m
3	19	female	Finished stimuli\wf_fea_jumbled_noeyes.jpg	wf	fear	no	no	1	298	-1	7	z	z
3	19	female	Finished stimuli\rhap_jumbledeyes.jpg	rh	happy	no	yes	1	521	-1	6	m	m
3	19	female	Finished stimuli\mo_fear_jumbledeyes.jpg	mo	fear	no	yes	1	263	-1	6	m	m
3	19	female	Finished stimuli\jjfear_jumbledeyes.jpg	jj	fear	no	yes	0	391	-1	7	m	z
3	19	female	Finished stimuli\pf_hap_jumbled_noeye.jpg	pf	happy	no	no	0	522	-1	6	z	m
3	19	female	Finished stimuli\pf_fear_upeyes.jpg	pf	fear	yes	yes	1	416	-1	6	m	m
3	19	female	Finished stimuli\pefear_up_noeyes.jpg	pe	fear	yes	no	1	368	-1	7	z	z
3	19	female	Finished stimuli\mf_fear_upeye.jpg	mf	fear	yes	yes	1	316	-1	7	m	m
3	19	female	Finished stimuli\em_fear_upeyes.jpg	em	fear	yes	yes	1	466	-1	7	m	m
3	19	female	Finished stimuli\em_hap_upeyes.jpg	em	happy	yes	yes	1	857	-1	7	m	m
3	19	female	Finished stimuli\sw_fear_upeyes.jpg	sw	fear	yes	yes	1	266	-1	6	m	m
3	19	female	Finished stimuli\em_fear_jumbledeyes.jpg	em	fear	no	yes	1	290	-1	6	m	m
3	19	female	Finished stimuli\sw_fear_jumbled_eyes.jpg	sw	fear	no	yes	1	393	-1	6	m	m
3	19	female	Finished stimuli\cc_fearjumbledno_eye.jpg	cc	fear	no	no	1	396	-1	7	z	z
3	19	female	Finished stimuli\cc_fear_jumbledeyes.jpg	cc	fear	no	yes	1	206	-1	7	m	m
3	19	female	Finished stimuli\pf_hap_jumbledeye.jpg	pf	happy	no	yes	1	840	-1	7	m	m
3	19	female	Finished stimuli\wf_fea_up eyes.jpg	wf	fear	yes	yes	1	217	-1	6	m	m
3	19	female	Finished stimuli\mo_hap_jumbledeyes.jpg	mo	happy	no	yes	1	315	-1	6	m	m
3	19	female	Finished stimuli\pf_hap_up_noeye.jpg	pf	happy	yes	no	0	265	-1	7	z	m
3	19	female	Finished stimuli\sw_hap_noeyes.jpg	sw	happy	yes	no	0	281	-1	7	z	m
3	19	female	Finished stimuli\pehappy_jumbled_eyes.jpg	pe	happy	no	yes	1	136	-1	7	m	m
3	19	female	Finished stimuli\cc_happy_jumbledeyes.jpg	cc	happy	no	yes	1	141	-1	6	m	m
3	19	female	Finished stimuli\pefear_upeyes.jpg	pe	fear	yes	yes	1	234	-1	6	m	m
3	19	female	Finished stimuli\wf_hap_jumbled_noeyes.jpg	wf	happy	no	no	0	331	-1	6	z	m
3	19	female	Finished stimuli\mo_hap_upeyes.jpg	mo	happy	yes	yes	1	144	-1	7	m	m
3	19	female	Finished stimuli\rfear_up_noeys.jpg	rf	fear	yes	no	0	117	-1	7	z	m
3	19	female	Finished stimuli\mo_fear_jumblednoeyes.jpg	mo	fear	no	no	0	331	-1	7	z	m
3	19	female	Finished stimuli\jjfear_jumblednoeyes.jpg	jj	fear	no	no	1	520	-1	7	z	z
3	19	female	Finished stimuli\pf_fear_up_noeyes.jpg	pf	fear	yes	no	1	398	-1	7	z	z
3	19	female	Finished stimuli\em_hap_noeyes.jpg	em	happy	yes	no	1	328	-1	6	z	z
3	19	female	Finished stimuli\mf_fear_jumblednoeye.jpg	mf	fear	no	no	0	349	-1	7	z	m
3	19	female	Finished stimuli\em_hap_jumblednoeyes.jpg	em	happy	no	no	1	257	-1	7	z	z
3	19	female	Finished stimuli\pefear_up_jumbledeyes.jpg	pe	fear	no	yes	1	418	-1	7	m	m
3	19	female	Finished stimuli\rfear_jumbledeyess.jpg	rf	fear	no	yes	0	252	-1	7	m	z
3	19	female	Finished stimuli\JJhappyjumblednoeyes.jpg	JJ	happy	no	no	1	516	-1	6	z	z
3	19	female	Finished stimuli\pf_fear_jumbledeyes.jpg	pf	fear	no	yes	1	129	-1	6	m	m
3	19	female	Finished stimuli\em_fear_noeyes.jpg	em	fear	yes	no	1	198	-1	6	z	z
3	19	female	Finished stimuli\pf_hap_upeye.jpg	pf	happy	yes	yes	1	377	-1	7	m	m
3	19	female	Finished stimuli\mo_fear_upnoeyes.jpg	mo	fear	yes	no	1	404	-1	6	z	z
3	19	female	Finished stimuli\pehappy_noeyes.jpg	pe	happy	yes	no	0	79	-1	6	z	m
3	19	female	Finished stimuli\cc_happy_upeyes.jpg	cc	happy	yes	yes	1	166	-1	6	m	m
3	19	female	Finished stimuli\em_hap_noeyes.jpg	em	happy	yes	no	0	442	-1	6	z	m
3	19	female	Finished stimuli\wf_fea_jumbled_eyes.jpg	wf	fear	no	yes	0	266	-1	7	m	z
3	19	female	Finished stimuli\rhap_noeyes.jpg	rh	happy	yes	no	1	194	-1	7	z	z
3	19	female	Finished stimuli\em_fear_jumblednoeyes.jpg	em	fear	no	no	1	293	-1	7	z	z
3	19	female	Finished stimuli\mf_fear_upeye.jpg	mf	fear	yes	yes	1	235	-1	7	m	m
3	19	female	Finished stimuli\cc_happy_jumblednoeyes.jpg	cc	happy	no	no	1	316	-1	7	z	z
3	19	female	Finished stimuli\wf_fea_up_noeyes.jpg	wf	fear	yes	no	1	354	-1	7	z	z
3	19	female	Finished stimuli\wf_hap_up_noeyes.jpg	wf	happy	yes	no	0	221	-1	6	z	m
3	19	female	Finished stimuli\em_fear_upeyes.jpg	em	fear	yes	yes	1	111	-1	6	m	m
3	19	female	Finished stimuli\pf_fear_up_noeyes.jpg	pf	fear	yes	no	1	173	-1	7	z	z
3	19	female	Finished stimuli\pf_fear_jumbledeyes.jpg	pf	fear	no	yes	0	233	-1	7	m	z
3	19	female	Finished stimuli\jjfear_upeyes.jpg	jj	fear	yes	yes	1	378	-1	7	m	m
3	19	female	Finished stimuli\wf_hap_upeyes.jpg	wf	happy	yes	yes	1	397	-1	6	m	m
3	19	female	Finished stimuli\cc_fearjumbledno_eye.jpg	cc	fear	no	no	1	439	-1	7	z	z
3	19	female	Finished stimuli\pefear_up_jumbledeyes.jpg	pe	fear	no	yes	1	313	-1	7	m	m
3	19	female	Finished stimuli\mo_hap_upeyes.jpg	mo	happy	yes	yes	1	391	-1	7	m	m
3	19	female	Finished stimuli\pf_hap_jumbled_noeye.jpg	pf	happy	no	no	0	218	-1	7	z	m
3	19	female	Finished stimuli\sw_fear_noeyes.jpg	sw	fear	yes	no	0	164	-1	7	z	m
3	19	female	Finished stimuli\wf_fea_up eyes.jpg	wf	fear	yes	yes	1	159	-1	7	m	m
3	19	female	Finished stimuli\wf_hap_jumbled_noeyes.jpg	wf	happy	no	no	1	339	-1	6	z	z
3	19	female	Finished stimuli\mo_fear_jumblednoeyes.jpg	mo	fear	no	no	1	448	-1	7	z	z
3	19	female	Finished stimuli\rfear_jumbledeyess.jpg	rf	fear	no	yes	1	473	-1	6	m	m
3	19	female	Finished stimuli\cc_fear_jumbledeyes.jpg	cc	fear	no	yes	1	377	-1	7	m	m
3	19	female	Finished stimuli\rfear_up_noeys.jpg	rf	fear	yes	no	0	372	-1	6	z	m
3	19	female	Finished stimuli\mf_happy_upno_eyes.jpg	mf	happy	yes	no	1	391	-1	7	z	z
3	19	female	Finished stimuli\jjfear_jumblednoeyes.jpg	jj	fear	no	no	1	474	-1	7	z	z
3	19	female	Finished stimuli\pf_hap_upeye.jpg	pf	happy	yes	yes	1	418	-1	7	m	m
3	19	female	Finished stimuli\cc_happy_jumbledeyes.jpg	cc	happy	no	yes	1	515	-1	7	m	m
3	19	female	Finished stimuli\em_hap_jumbledeyes.jpg	em	happy	no	yes	0	313	-1	6	m	z
3	19	female	Finished stimuli\pefear_up_noeyes.jpg	pe	fear	yes	no	1	358	-1	7	z	z
3	19	female	Finished stimuli\mf_happy_jumbled_noeyes.jpg	mf	happy	no	no	1	593	-1	6	z	z
3	19	female	Finished stimuli\cc_happy_upnoeyes.jpg	cc	happy	yes	no	1	236	-1	7	z	z
3	19	female	Finished stimuli\mo_fear_upnoeyes.jpg	mo	fear	yes	no	1	277	-1	7	z	z
3	19	female	Finished stimuli\mf_fear_jumblednoeye.jpg	mf	fear	no	no	1	635	-1	6	z	z
3	19	female	Finished stimuli\pf_hap_jumbledeye.jpg	pf	happy	no	yes	1	325	-1	7	m	m
3	19	female	Finished stimuli\JJhappyupnoeyes.jpg	JJ	happy	yes	no	0	368	-1	7	z	m
3	19	female	Finished stimuli\cc_fear_up.jpg	cc	fear	yes	yes	1	372	-1	7	m	m
3	19	female	Finished stimuli\sw_fear_upeyes.jpg	sw	fear	yes	yes	1	320	-1	6	m	m
3	19	female	Finished stimuli\pf_fear_upeyes.jpg	pf	fear	yes	yes	1	326	-1	6	m	m
3	19	female	Finished stimuli\mo_hap_jumbledeyes.jpg	mo	happy	no	yes	1	323	-1	6	m	m
3	19	female	Finished stimuli\mo_fear_upeyes.jpg	mo	fear	yes	yes	1	201	-1	6	m	m
3	19	female	Finished stimuli\rfear_jumbled_noeyess.jpg	rf	fear	no	no	1	332	-1	7	z	z
3	19	female	Finished stimuli\rhap_jumbled_noeyes.jpg	rh	happy	no	no	1	537	-1	7	z	z
3	19	female	Finished stimuli\sw_hap_noeyes.jpg	sw	happy	yes	no	1	294	-1	6	z	z
3	19	female	Finished stimuli\mf_fear_jumbledeye.jpg	mf	fear	no	yes	1	324	-1	7	m	m
3	19	female	Finished stimuli\sw_fear_jumbled_eyes.jpg	sw	fear	no	yes	1	346	-1	7	m	m
3	19	female	Finished stimuli\rhap.jpg	rh	happy	yes	yes	1	461	-1	6	m	m
3	19	female	Finished stimuli\em_fear_jumbledeyes.jpg	em	fear	no	yes	1	317	-1	6	m	m
3	19	female	Finished stimuli\sw_hap_jumbled_noeyes.jpg	sw	happy	no	no	1	322	-1	7	z	z
3	19	female	Finished stimuli\jjfear_upnoeyes.jpg	jj	fear	yes	no	0	847	-1	7	z	m
3	19	female	Finished stimuli\sw_hap_upeyes.jpg	sw	happy	yes	yes	1	488	-1	6	m	m
3	19	female	Finished stimuli\sw_hap_jumbledeyes.jpg	sw	happy	no	yes	1	447	-1	7	m	m
3	19	female	Finished stimuli\pf_fear_jumbled_noeyes.jpg	pf	fear	no	no	0	320	-1	6	z	m
3	19	female	Finished stimuli\pf_hap_up_noeye.jpg	pf	happy	yes	no	0	182	-1	6	z	m
3	19	female	Finished stimuli\pehappy_jumbled_eyes.jpg	pe	happy	no	yes	1	673	-1	6	m	m
3	19	female	Finished stimuli\pefear_upeyes.jpg	pe	fear	yes	yes	1	321	-1	6	m	m
3	19	female	Finished stimuli\sw_fear_jumbled_noeyes.jpg	sw	fear	no	no	0	551	-1	7	z	m
3	19	female	Finished stimuli\JJhappyupeyes.jpg	JJ	happy	yes	yes	1	419	-1	7	m	m
3	19	female	Finished stimuli\jjhap_jumbledeyes.jpg	jj	happy	no	yes	1	221	-1	7	m	m
3	19	female	Finished stimuli\mf_happy_upeyes.jpg	mf	happy	yes	yes	1	279	-1	7	m	m
3	19	female	Finished stimuli\mo_hap_up_noeyes.jpg	mo	happy	yes	no	0	542	-1	7	z	m
3	19	female	Finished stimuli\em_fear_noeyes.jpg	em	fear	yes	no	1	394	-1	7	z	z
3	19	female	Finished stimuli\em_hap_jumblednoeyes.jpg	em	happy	no	no	0	477	-1	7	z	m
3	19	female	Finished stimuli\em_hap_upeyes.jpg	em	happy	yes	yes	1	748	-1	6	m	m
3	19	female	Finished stimuli\pefear_up_jumbled_noeyes.jpg	pe	fear	no	no	1	608	-1	7	z	z
3	19	female	Finished stimuli\rfear_upeys.jpg	rf	fear	yes	yes	1	530	-1	7	m	m
3	19	female	Finished stimuli\mo_fear_jumbledeyes.jpg	mo	fear	no	yes	1	455	-1	6	m	m
3	19	female	Finished stimuli\JJhappyjumblednoeyes.jpg	JJ	happy	no	no	0	1168	-1	7	z	m
3	19	female	Finished stimuli\mf_happy_jumbledeyes.jpg	mf	happy	no	yes	1	211	-1	6	m	m
3	19	female	Finished stimuli\wf_hap_jumbledeyes.jpg	wf	happy	no	yes	0	373	-1	6	m	z
3	19	female	Finished stimuli\cc_fear_noeyes.jpg	cc	fear	yes	no	0	297	-1	7	z	m
3	19	female	Finished stimuli\mo_hap_jumblednoeyes.jpg	mo	happy	no	no	0	551	-1	7	z	m
3	19	female	Finished stimuli\wf_fea_jumbled_noeyes.jpg	wf	fear	no	no	1	372	-1	6	z	z
3	19	female	Finished stimuli\rhap_jumbledeyes.jpg	rh	happy	no	yes	1	432	-1	7	m	m
3	19	female	Finished stimuli\pehappy_jumbled_no_eyes.jpg	pe	happy	no	no	0	593	-1	6	z	m
3	19	female	Finished stimuli\mf_fear_up_noeye.jpg	mf	fear	yes	no	1	555	-1	6	z	z
3	19	female	Finished stimuli\jjfear_jumbledeyes.jpg	jj	fear	no	yes	1	456	-1	7	m	m
3	19	female	Finished stimuli\pehappy_upeyes.jpg	pe	happy	yes	yes	1	456	-1	6	m	m
3	19	female	Finished stimuli\sw_fear_jumbled_eyes.jpg	sw	fear	no	yes	1	270	-1	7	m	m
3	19	female	Finished stimuli\rhap_jumbledeyes.jpg	rh	happy	no	yes	1	341	-1	7	m	m
3	19	female	Finished stimuli\sw_fear_upeyes.jpg	sw	fear	yes	yes	1	330	-1	6	m	m
3	19	female	Finished stimuli\pefear_upeyes.jpg	pe	fear	yes	yes	1	495	-1	6	m	m
3	19	female	Finished stimuli\rhap_noeyes.jpg	rh	happy	yes	no	0	254	-1	7	z	m
3	19	female	Finished stimuli\pf_fear_jumbled_noeyes.jpg	pf	fear	no	no	0	782	-1	6	z	m
3	19	female	Finished stimuli\jjfear_upnoeyes.jpg	jj	fear	yes	no	0	146	-1	7	z	m
3	19	female	Finished stimuli\cc_happy_jumblednoeyes.jpg	cc	happy	no	no	0	254	-1	6	z	m
3	19	female	Finished stimuli\pehappy_jumbled_no_eyes.jpg	pe	happy	no	no	1	694	-1	7	z	z
3	19	female	Finished stimuli\mo_hap_jumbledeyes.jpg	mo	happy	no	yes	1	229	-1	6	m	m
3	19	female	Finished stimuli\jjfear_upeyes.jpg	jj	fear	yes	yes	1	318	-1	7	m	m
3	19	female	Finished stimuli\mo_fear_upnoeyes.jpg	mo	fear	yes	no	0	212	-1	6	z	m
3	19	female	Finished stimuli\sw_hap_jumbledeyes.jpg	sw	happy	no	yes	1	350	-1	6	m	m
3	19	female	Finished stimuli\pf_hap_jumbled_noeye.jpg	pf	happy	no	no	0	242	-1	7	z	m
3	19	female	Finished stimuli\em_hap_upeyes.jpg	em	happy	yes	yes	1	211	-1	6	m	m
3	19	female	Finished stimuli\jjhap_jumbledeyes.jpg	jj	happy	no	yes	1	237	-1	7	m	m
3	19	female	Finished stimuli\JJhappyupnoeyes.jpg	JJ	happy	yes	no	0	165	-1	7	z	m
3	19	female	Finished stimuli\pf_fear_jumbledeyes.jpg	pf	fear	no	yes	1	160	-1	7	m	m
3	19	female	Finished stimuli\pf_hap_upeye.jpg	pf	happy	yes	yes	1	348	-1	6	m	m
3	19	female	Finished stimuli\wf_hap_jumbledeyes.jpg	wf	happy	no	yes	1	312	-1	7	m	m
3	19	female	Finished stimuli\jjfear_jumblednoeyes.jpg	jj	fear	no	no	1	470	-1	7	z	z
3	19	female	Finished stimuli\JJhappyupeyes.jpg	JJ	happy	yes	yes	0	197	-1	7	m	z
3	19	female	Finished stimuli\mo_fear_upeyes.jpg	mo	fear	yes	yes	1	600	-1	6	m	m
3	19	female	Finished stimuli\wf_fea_jumbled_noeyes.jpg	wf	fear	no	no	1	411	-1	7	z	z
3	19	female	Finished stimuli\cc_fear_jumbledeyes.jpg	cc	fear	no	yes	1	476	-1	7	m	m
3	19	female	Finished stimuli\pf_fear_up_noeyes.jpg	pf	fear	yes	no	1	452	-1	7	z	z
3	19	female	Finished stimuli\sw_hap_noeyes.jpg	sw	happy	yes	no	0	476	-1	7	z	m
3	19	female	Finished stimuli\mf_fear_jumblednoeye.jpg	mf	fear	no	no	0	963	-1	6	z	m
3	19	female	Finished stimuli\em_hap_jumblednoeyes.jpg	em	happy	no	no	1	367	-1	6	z	z
3	19	female	Finished stimuli\pefear_up_noeyes.jpg	pe	fear	yes	no	1	474	-1	7	z	z
3	19	female	Finished stimuli\mo_hap_jumblednoeyes.jpg	mo	happy	no	no	1	849	-1	7	z	z
3	19	female	Finished stimuli\cc_happy_jumbledeyes.jpg	cc	happy	no	yes	1	314	-1	6	m	m
3	19	female	Finished stimuli\sw_fear_jumbled_noeyes.jpg	sw	fear	no	no	1	328	-1	6	z	z
3	19	female	Finished stimuli\em_fear_upeyes.jpg	em	fear	yes	yes	1	533	-1	7	m	m
3	19	female	Finished stimuli\mo_fear_jumblednoeyes.jpg	mo	fear	no	no	1	411	-1	7	z	z
3	19	female	Finished stimuli\pehappy_upeyes.jpg	pe	happy	yes	yes	1	324	-1	7	m	m
3	19	female	Finished stimuli\em_fear_jumblednoeyes.jpg	em	fear	no	no	1	257	-1	7	z	z
3	19	female	Finished stimuli\cc_fear_up.jpg	cc	fear	yes	yes	1	506	-1	7	m	m
3	19	female	Finished stimuli\wf_fea_jumbled_eyes.jpg	wf	fear	no	yes	1	528	-1	7	m	m
3	19	female	Finished stimuli\JJhappyjumblednoeyes.jpg	JJ	happy	no	no	0	222	-1	7	z	m
3	19	female	Finished stimuli\em_fear_noeyes.jpg	em	fear	yes	no	0	471	-1	7	z	m
3	19	female	Finished stimuli\mo_hap_up_noeyes.jpg	mo	happy	yes	no	0	303	-1	7	z	m
3	19	female	Finished stimuli\mf_happy_jumbled_noeyes.jpg	mf	happy	no	no	1	341	-1	6	z	z
3	19	female	Finished stimuli\mf_happy_upno_eyes.jpg	mf	happy	yes	no	1	217	-1	6	z	z
3	19	female	Finished stimuli\pefear_up_jumbledeyes.jpg	pe	fear	no	yes	1	251	-1	7	m	m
3	19	female	Finished stimuli\mf_fear_jumbledeye.jpg	mf	fear	no	yes	1	387	-1	7	m	m
3	19	female	Finished stimuli\pefear_up_jumbled_noeyes.jpg	pe	fear	no	no	0	302	-1	6	z	m
3	19	female	Finished stimuli\mf_happy_jumbledeyes.jpg	mf	happy	no	yes	1	164	-1	7	m	m
3	19	female	Finished stimuli\pf_fear_upeyes.jpg	pf	fear	yes	yes	1	272	-1	7	m	m
3	19	female	Finished stimuli\rfear_up_noeys.jpg	rf	fear	yes	no	0	199	-1	7	z	m
3	19	female	Finished stimuli\rfear_jumbledeyess.jpg	rf	fear	no	yes	1	442	-1	7	m	m
3	19	female	Finished stimuli\wf_hap_jumbled_noeyes.jpg	wf	happy	no	no	1	282	-1	7	z	z
3	19	female	Finished stimuli\mf_happy_upeyes.jpg	mf	happy	yes	yes	1	689	-1	6	m	m
3	19	female	Finished stimuli\sw_hap_upeyes.jpg	sw	happy	yes	yes	1	376	-1	7	m	m
3	19	female	Finished stimuli\rhap.jpg	rh	happy	yes	yes	1	291	-1	7	m	m
3	19	female	Finished stimuli\em_hap_jumbledeyes.jpg	em	happy	no	yes	1	323	-1	7	m	m
3	19	female	Finished stimuli\rhap_jumbled_noeyes.jpg	rh	happy	no	no	1	327	-1	7	z	z
3	19	female	Finished stimuli\rfear_upeys.jpg	rf	fear	yes	yes	1	357	-1	7	m	m
3	19	female	Finished stimuli\sw_hap_jumbled_noeyes.jpg	sw	happy	no	no	1	592	-1	6	z	z
3	19	female	Finished stimuli\pehappy_noeyes.jpg	pe	happy	yes	no	0	403	-1	7	z	m
3	19	female	Finished stimuli\em_hap_noeyes.jpg	em	happy	yes	no	1	773	-1	6	z	z
3	19	female	Finished stimuli\em_fear_jumbledeyes.jpg	em	fear	no	yes	1	265	-1	6	m	m
3	19	female	Finished stimuli\pf_hap_up_noeye.jpg	pf	happy	yes	no	0	889	-1	6	z	m
3	19	female	Finished stimuli\wf_fea_up eyes.jpg	wf	fear	yes	yes	1	384	-1	7	m	m
3	19	female	Finished stimuli\wf_hap_upeyes.jpg	wf	happy	yes	yes	1	564	-1	7	m	m
3	19	female	Finished stimuli\sw_fear_noeyes.jpg	sw	fear	yes	no	1	208	-1	7	z	z
3	19	female	Finished stimuli\mf_fear_up_noeye.jpg	mf	fear	yes	no	1	577	-1	7	z	z
3	19	female	Finished stimuli\pf_hap_jumbledeye.jpg	pf	happy	no	yes	1	309	-1	7	m	m
3	19	female	Finished stimuli\pehappy_jumbled_eyes.jpg	pe	happy	no	yes	1	314	-1	7	m	m
3	19	female	Finished stimuli\wf_fea_up_noeyes.jpg	wf	fear	yes	no	0	384	-1	7	z	m
3	19	female	Finished stimuli\wf_hap_up_noeyes.jpg	wf	happy	yes	no	0	300	-1	7	z	m
3	19	female	Finished stimuli\cc_happy_upeyes.jpg	cc	happy	yes	yes	1	346	-1	6	m	m
3	19	female	Finished stimuli\mo_hap_upeyes.jpg	mo	happy	yes	yes	1	351	-1	7	m	m
3	19	female	Finished stimuli\cc_fear_noeyes.jpg	cc	fear	yes	no	0	283	-1	6	z	m
3	19	female	Finished stimuli\rfear_jumbled_noeyess.jpg	rf	fear	no	no	1	273	-1	7	z	z
3	19	female	Finished stimuli\mf_fear_upeye.jpg	mf	fear	yes	yes	1	344	-1	7	m	m
3	19	female	Finished stimuli\mo_fear_jumbledeyes.jpg	mo	fear	no	yes	1	341	-1	6	m	m
3	19	female	Finished stimuli\cc_happy_upnoeyes.jpg	cc	happy	yes	no	1	298	-1	6	z	z
3	19	female	Finished stimuli\cc_fearjumbledno_eye.jpg	cc	fear	no	no	1	225	-1	7	z	z
3	19	female	Finished stimuli\jjfear_jumbledeyes.jpg	jj	fear	no	yes	1	506	-1	7	m	m
5	19	female	Finished stimuli\pehappy_jumbled_eyes.jpg	pe	happy	no	yes	0	312	-1	23	m	z
5	19	female	Finished stimuli\sw_fear_upeyes.jpg	sw	fear	yes	yes	1	269	-1	23	m	m
5	19	female	Finished stimuli\JJhappyupnoeyes.jpg	JJ	happy	yes	no	1	963	-1	6	z	z
5	19	female	Finished stimuli\mo_fear_upeyes.jpg	mo	fear	yes	yes	0	327	-1	7	m	z
5	19	female	Finished stimuli\em_hap_upeyes.jpg	em	happy	yes	yes	0	828	-1	7	m	z
5	19	female	Finished stimuli\rfear_jumbled_noeyess.jpg	rf	fear	no	no	1	398	-1	7	z	z
5	19	female	Finished stimuli\jjfear_jumbledeyes.jpg	jj	fear	no	yes	1	263	-1	7	m	m
5	19	female	Finished stimuli\cc_happy_jumbledeyes.jpg	cc	happy	no	yes	1	447	-1	6	m	m
5	19	female	Finished stimuli\sw_fear_jumbled_eyes.jpg	sw	fear	no	yes	1	411	-1	7	m	m
5	19	female	Finished stimuli\wf_fea_jumbled_noeyes.jpg	wf	fear	no	no	1	293	-1	7	z	z
5	19	female	Finished stimuli\pehappy_jumbled_no_eyes.jpg	pe	happy	no	no	1	323	-1	6	z	z
5	19	female	Finished stimuli\mf_happy_upeyes.jpg	mf	happy	yes	yes	1	296	-1	7	m	m
5	19	female	Finished stimuli\wf_hap_upeyes.jpg	wf	happy	yes	yes	0	399	-1	7	m	z
5	19	female	Finished stimuli\JJhappyupeyes.jpg	JJ	happy	yes	yes	1	217	-1	7	m	m
5	19	female	Finished stimuli\mf_happy_jumbled_noeyes.jpg	mf	happy	no	no	1	371	-1	7	z	z
5	19	female	Finished stimuli\mf_fear_upeye.jpg	mf	fear	yes	yes	1	198	-1	7	m	m
5	19	female	Finished stimuli\cc_happy_upnoeyes.jpg	cc	happy	yes	no	1	408	-1	6	z	z
5	19	female	Finished stimuli\pf_hap_jumbledeye.jpg	pf	happy	no	yes	0	562	-1	6	m	z
5	19	female	Finished stimuli\mo_fear_jumblednoeyes.jpg	mo	fear	no	no	1	470	-1	6	z	z
5	19	female	Finished stimuli\mf_fear_up_noeye.jpg	mf	fear	yes	no	1	326	-1	6	z	z
5	19	female	Finished stimuli\pf_fear_jumbledeyes.jpg	pf	fear	no	yes	1	131	-1	6	m	m
5	19	female	Finished stimuli\wf_hap_jumbled_noeyes.jpg	wf	happy	no	no	1	312	-1	7	z	z
5	19	female	Finished stimuli\sw_hap_jumbled_noeyes.jpg	sw	happy	no	no	1	437	-1	7	z	z
5	19	female	Finished stimuli\pefear_upeyes.jpg	pe	fear	yes	yes	1	662	-1	6	m	m
5	19	female	Finished stimuli\sw_hap_upeyes.jpg	sw	happy	yes	yes	1	477	-1	6	m	m
5	19	female	Finished stimuli\em_fear_jumblednoeyes.jpg	em	fear	no	no	1	356	-1	7	z	z
5	19	female	Finished stimuli\sw_fear_jumbled_noeyes.jpg	sw	fear	no	no	1	785	-1	7	z	z
5	19	female	Finished stimuli\sw_fear_noeyes.jpg	sw	fear	yes	no	0	268	-1	6	z	m
5	19	female	Finished stimuli\pefear_up_jumbled_noeyes.jpg	pe	fear	no	no	1	636	-1	6	z	z
5	19	female	Finished stimuli\mo_hap_jumblednoeyes.jpg	mo	happy	no	no	1	293	-1	7	z	z
5	19	female	Finished stimuli\mo_hap_up_noeyes.jpg	mo	happy	yes	no	0	692	-1	7	z	m
5	19	female	Finished stimuli\sw_hap_noeyes.jpg	sw	happy	yes	no	1	451	-1	7	z	z
5	19	female	Finished stimuli\pefear_up_jumbledeyes.jpg	pe	fear	no	yes	1	323	-1	6	m	m
5	19	female	Finished stimuli\rhap_jumbled_noeyes.jpg	rh	happy	no	no	1	361	-1	6	z	z
5	19	female	Finished stimuli\sw_hap_jumbledeyes.jpg	sw	happy	no	yes	1	573	-1	7	m	m
5	19	female	Finished stimuli\pf_fear_jumbled_noeyes.jpg	pf	fear	no	no	1	321	-1	7	z	z
5	19	female	Finished stimuli\em_fear_upeyes.jpg	em	fear	yes	yes	1	351	-1	7	m	m
5	19	female	Finished stimuli\rhap_noeyes.jpg	rh	happy	yes	no	0	731	-1	6	z	m
5	19	female	Finished stimuli\pf_fear_up_noeyes.jpg	pf	fear	yes	no	1	521	-1	7	z	z
5	19	female	Finished stimuli\pehappy_upeyes.jpg	pe	happy	yes	yes	1	310	-1	7	m	m
5	19	female	Finished stimuli\mf_fear_jumbledeye.jpg	mf	fear	no	yes	1	428	-1	7	m	m
5	19	female	Finished stimuli\cc_fear_jumbledeyes.jpg	cc	fear	no	yes	1	277	-1	7	m	m
5	19	female	Finished stimuli\wf_fea_up eyes.jpg	wf	fear	yes	yes	1	291	-1	6	m	m
5	19	female	Finished stimuli\wf_fea_up_noeyes.jpg	wf	fear	yes	no	1	458	-1	7	z	z
5	19	female	Finished stimuli\mf_happy_jumbledeyes.jpg	mf	happy	no	yes	0	441	-1	7	m	z
5	19	female	Finished stimuli\jjfear_upeyes.jpg	jj	fear	yes	yes	1	282	-1	6	m	m
5	19	female	Finished stimuli\mo_hap_jumbledeyes.jpg	mo	happy	no	yes	0	345	-1	6	m	z
5	19	female	Finished stimuli\pf_hap_up_noeye.jpg	pf	happy	yes	no	1	398	-1	7	z	z
5	19	female	Finished stimuli\em_fear_noeyes.jpg	em	fear	yes	no	1	320	-1	7	z	z
5	19	female	Finished stimuli\cc_fear_up.jpg	cc	fear	yes	yes	1	278	-1	6	m	m
5	19	female	Finished stimuli\rhap_jumbledeyes.jpg	rh	happy	no	yes	0	341	-1	7	m	z
5	19	female	Finished stimuli\pf_hap_upeye.jpg	pf	happy	yes	yes	1	338	-1	7	m	m
5	19	female	Finished stimuli\pf_hap_jumbled_noeye.jpg	pf	happy	no	no	1	319	-1	6	z	z
5	19	female	Finished stimuli\rhap.jpg	rh	happy	yes	yes	1	301	-1	7	m	m
5	19	female	Finished stimuli\pefear_up_noeyes.jpg	pe	fear	yes	no	1	410	-1	6	z	z
5	19	female	Finished stimuli\mo_fear_upnoeyes.jpg	mo	fear	yes	no	1	596	-1	6	z	z
5	19	female	Finished stimuli\pf_fear_upeyes.jpg	pf	fear	yes	yes	1	239	-1	7	m	m
5	19	female	Finished stimuli\rfear_upeys.jpg	rf	fear	yes	yes	1	256	-1	7	m	m
5	19	female	Finished stimuli\JJhappyjumblednoeyes.jpg	JJ	happy	no	no	1	320	-1	6	z	z
5	19	female	Finished stimuli\jjhap_jumbledeyes.jpg	jj	happy	no	yes	0	598	-1	6	m	z
5	19	female	Finished stimuli\rfear_jumbledeyess.jpg	rf	fear	no	yes	1	305	-1	7	m	m
5	19	female	Finished stimuli\jjfear_jumblednoeyes.jpg	jj	fear	no	no	1	446	-1	6	z	z
5	19	female	Finished stimuli\em_hap_noeyes.jpg	em	happy	yes	no	1	303	-1	7	z	z
5	19	female	Finished stimuli\cc_happy_upeyes.jpg	cc	happy	yes	yes	1	293	-1	7	m	m
5	19	female	Finished stimuli\cc_happy_jumblednoeyes.jpg	cc	happy	no	no	1	404	-1	7	z	z
5	19	female	Finished stimuli\cc_fear_noeyes.jpg	cc	fear	yes	no	1	230	-1	7	z	z
5	19	female	Finished stimuli\wf_hap_up_noeyes.jpg	wf	happy	yes	no	1	335	-1	7	z	z
5	19	female	Finished stimuli\em_hap_jumblednoeyes.jpg	em	happy	no	no	1	181	-1	7	z	z
5	19	female	Finished stimuli\em_hap_jumbledeyes.jpg	em	happy	no	yes	0	152	-1	7	m	z
5	19	female	Finished stimuli\cc_fearjumbledno_eye.jpg	cc	fear	no	no	1	156	-1	7	z	z
5	19	female	Finished stimuli\mf_fear_jumblednoeye.jpg	mf	fear	no	no	1	160	-1	6	z	z
5	19	female	Finished stimuli\jjfear_upnoeyes.jpg	jj	fear	yes	no	1	196	-1	7	z	z
5	19	female	Finished stimuli\wf_fea_jumbled_eyes.jpg	wf	fear	no	yes	0	142	-1	7	m	z
5	19	female	Finished stimuli\mo_fear_jumbledeyes.jpg	mo	fear	no	yes	1	243	-1	7	m	m
5	19	female	Finished stimuli\pehappy_noeyes.jpg	pe	happy	yes	no	1	275	-1	7	z	z
5	19	female	Finished stimuli\mf_happy_upno_eyes.jpg	mf	happy	yes	no	1	234	-1	7	z	z
5	19	female	Finished stimuli\wf_hap_jumbledeyes.jpg	wf	happy	no	yes	0	131	-1	6	m	z
5	19	female	Finished stimuli\mo_hap_upeyes.jpg	mo	happy	yes	yes	1	360	-1	6	m	m
5	19	female	Finished stimuli\em_fear_jumbledeyes.jpg	em	fear	no	yes	0	300	-1	7	m	z
5	19	female	Finished stimuli\rfear_up_noeys.jpg	rf	fear	yes	no	1	378	-1	7	z	z
5	19	female	Finished stimuli\sw_fear_noeyes.jpg	sw	fear	yes	no	1	255	-1	6	z	z
5	19	female	Finished stimuli\sw_fear_jumbled_noeyes.jpg	sw	fear	no	no	1	400	-1	7	z	z
5	19	female	Finished stimuli\em_fear_upeyes.jpg	em	fear	yes	yes	1	298	-1	6	m	m
5	19	female	Finished stimuli\mf_fear_up_noeye.jpg	mf	fear	yes	no	1	168	-1	6	z	z
5	19	female	Finished stimuli\sw_hap_jumbledeyes.jpg	sw	happy	no	yes	0	692	-1	7	m	z
5	19	female	Finished stimuli\jjhap_jumbledeyes.jpg	jj	happy	no	yes	0	635	-1	7	m	z
5	19	female	Finished stimuli\jjfear_jumblednoeyes.jpg	jj	fear	no	no	1	276	-1	7	z	z
5	19	female	Finished stimuli\rfear_jumbled_noeyess.jpg	rf	fear	no	no	1	475	-1	6	z	z
5	19	female	Finished stimuli\mf_fear_jumbledeye.jpg	mf	fear	no	yes	1	258	-1	7	m	m
5	19	female	Finished stimuli\cc_fear_noeyes.jpg	cc	fear	yes	no	1	346	-1	6	z	z
5	19	female	Finished stimuli\pehappy_jumbled_no_eyes.jpg	pe	happy	no	no	1	383	-1	7	z	z
5	19	female	Finished stimuli\pf_hap_jumbledeye.jpg	pf	happy	no	yes	1	498	-1	7	m	m
5	19	female	Finished stimuli\em_hap_upeyes.jpg	em	happy	yes	yes	0	952	-1	7	m	z
5	19	female	Finished stimuli\pehappy_noeyes.jpg	pe	happy	yes	no	0	589	-1	6	z	m
5	19	female	Finished stimuli\pf_hap_up_noeye.jpg	pf	happy	yes	no	0	336	-1	7	z	m
5	19	female	Finished stimuli\rhap_jumbledeyes.jpg	rh	happy	no	yes	1	398	-1	7	m	m
5	19	female	Finished stimuli\pefear_up_jumbled_noeyes.jpg	pe	fear	no	no	1	536	-1	6	z	z
5	19	female	Finished stimuli\em_hap_jumbledeyes.jpg	em	happy	no	yes	0	285	-1	7	m	z
5	19	female	Finished stimuli\em_hap_noeyes.jpg	em	happy	yes	no	1	404	-1	7	z	z
5	19	female	Finished stimuli\JJhappyjumblednoeyes.jpg	JJ	happy	no	no	1	694	-1	6	z	z
5	19	female	Finished stimuli\mo_hap_jumbledeyes.jpg	mo	happy	no	yes	1	445	-1	7	m	m
5	19	female	Finished stimuli\em_fear_jumblednoeyes.jpg	em	fear	no	no	1	325	-1	7	z	z
5	19	female	Finished stimuli\rhap_noeyes.jpg	rh	happy	yes	no	0	1283	-1	7	z	m
5	19	female	Finished stimuli\pf_hap_jumbled_noeye.jpg	pf	happy	no	no	1	458	-1	6	z	z
5	19	female	Finished stimuli\rfear_upeys.jpg	rf	fear	yes	yes	1	514	-1	6	m	m
5	19	female	Finished stimuli\mf_happy_jumbled_noeyes.jpg	mf	happy	no	no	1	431	-1	7	z	z
5	19	female	Finished stimuli\mo_hap_jumblednoeyes.jpg	mo	happy	no	no	1	385	-1	7	z	z
5	19	female	Finished stimuli\wf_hap_upeyes.jpg	wf	happy	yes	yes	0	444	-1	7	m	z
5	19	female	Finished stimuli\JJhappyupnoeyes.jpg	JJ	happy	yes	no	0	387	-1	6	z	m
5	19	female	Finished stimuli\rhap_jumbled_noeyes.jpg	rh	happy	no	no	1	438	-1	7	z	z
5	19	female	Finished stimuli\wf_fea_jumbled_noeyes.jpg	wf	fear	no	no	1	520	-1	7	z	z
5	19	female	Finished stimuli\wf_fea_up_noeyes.jpg	wf	fear	yes	no	1	349	-1	7	z	z
5	19	female	Finished stimuli\sw_hap_jumbled_noeyes.jpg	sw	happy	no	no	1	369	-1	7	z	z
5	19	female	Finished stimuli\em_fear_jumbledeyes.jpg	em	fear	no	yes	1	350	-1	7	m	m
5	19	female	Finished stimuli\cc_fear_up.jpg	cc	fear	yes	yes	1	354	-1	6	m	m
5	19	female	Finished stimuli\JJhappyupeyes.jpg	JJ	happy	yes	yes	1	430	-1	7	m	m
5	19	female	Finished stimuli\cc_happy_upeyes.jpg	cc	happy	yes	yes	1	311	-1	6	m	m
5	19	female	Finished stimuli\mf_fear_upeye.jpg	mf	fear	yes	yes	1	308	-1	6	m	m
5	19	female	Finished stimuli\mo_hap_up_noeyes.jpg	mo	happy	yes	no	0	536	-1	6	z	m
5	19	female	Finished stimuli\mo_fear_jumblednoeyes.jpg	mo	fear	no	no	1	349	-1	7	z	z
5	19	female	Finished stimuli\wf_fea_up eyes.jpg	wf	fear	yes	yes	1	530	-1	6	m	m
5	19	female	Finished stimuli\sw_hap_noeyes.jpg	sw	happy	yes	no	1	359	-1	6	z	z
5	19	female	Finished stimuli\pefear_upeyes.jpg	pe	fear	yes	yes	1	259	-1	6	m	m
5	19	female	Finished stimuli\mo_hap_upeyes.jpg	mo	happy	yes	yes	1	611	-1	7	m	m
5	19	female	Finished stimuli\mo_fear_upnoeyes.jpg	mo	fear	yes	no	0	573	-1	7	z	m
5	19	female	Finished stimuli\pf_fear_jumbled_noeyes.jpg	pf	fear	no	no	1	937	-1	7	z	z
5	19	female	Finished stimuli\mo_fear_jumbledeyes.jpg	mo	fear	no	yes	1	502	-1	6	m	m
5	19	female	Finished stimuli\mf_happy_upno_eyes.jpg	mf	happy	yes	no	1	548	-1	6	z	z
5	19	female	Finished stimuli\cc_fearjumbledno_eye.jpg	cc	fear	no	no	1	489	-1	7	z	z
5	19	female	Finished stimuli\rfear_jumbledeyess.jpg	rf	fear	no	yes	0	448	-1	6	m	z
5	19	female	Finished stimuli\jjfear_jumbledeyes.jpg	jj	fear	no	yes	1	385	-1	7	m	m
5	19	female	Finished stimuli\pefear_up_noeyes.jpg	pe	fear	yes	no	1	322	-1	7	z	z
5	19	female	Finished stimuli\wf_hap_jumbled_noeyes.jpg	wf	happy	no	no	1	263	-1	7	z	z
5	19	female	Finished stimuli\pf_fear_up_noeyes.jpg	pf	fear	yes	no	1	303	-1	6	z	z
5	19	female	Finished stimuli\pehappy_upeyes.jpg	pe	happy	yes	yes	1	270	-1	7	m	m
5	19	female	Finished stimuli\mo_fear_upeyes.jpg	mo	fear	yes	yes	1	334	-1	7	m	m
5	19	female	Finished stimuli\em_fear_noeyes.jpg	em	fear	yes	no	1	427	-1	7	z	z
5	19	female	Finished stimuli\mf_happy_jumbledeyes.jpg	mf	happy	no	yes	1	579	-1	7	m	m
5	19	female	Finished stimuli\cc_fear_jumbledeyes.jpg	cc	fear	no	yes	1	391	-1	7	m	m
5	19	female	Finished stimuli\pehappy_jumbled_eyes.jpg	pe	happy	no	yes	0	330	-1	7	m	z
5	19	female	Finished stimuli\mf_happy_upeyes.jpg	mf	happy	yes	yes	1	342	-1	7	m	m
5	19	female	Finished stimuli\wf_hap_up_noeyes.jpg	wf	happy	yes	no	1	307	-1	7	z	z
5	19	female	Finished stimuli\rhap.jpg	rh	happy	yes	yes	1	345	-1	7	m	m
5	19	female	Finished stimuli\sw_fear_jumbled_eyes.jpg	sw	fear	no	yes	0	462	-1	6	m	z
5	19	female	Finished stimuli\cc_happy_jumbledeyes.jpg	cc	happy	no	yes	0	358	-1	7	m	z
5	19	female	Finished stimuli\pf_fear_jumbledeyes.jpg	pf	fear	no	yes	1	290	-1	7	m	m
5	19	female	Finished stimuli\pf_fear_upeyes.jpg	pf	fear	yes	yes	1	529	-1	7	m	m
5	19	female	Finished stimuli\rfear_up_noeys.jpg	rf	fear	yes	no	0	559	-1	7	z	m
5	19	female	Finished stimuli\cc_happy_jumblednoeyes.jpg	cc	happy	no	no	1	275	-1	7	z	z
5	19	female	Finished stimuli\cc_happy_upnoeyes.jpg	cc	happy	yes	no	1	267	-1	7	z	z
5	19	female	Finished stimuli\jjfear_upeyes.jpg	jj	fear	yes	yes	1	322	-1	7	m	m
5	19	female	Finished stimuli\sw_hap_upeyes.jpg	sw	happy	yes	yes	1	463	-1	6	m	m
5	19	female	Finished stimuli\em_hap_jumblednoeyes.jpg	em	happy	no	no	1	527	-1	6	z	z
5	19	female	Finished stimuli\jjfear_upnoeyes.jpg	jj	fear	yes	no	1	1420	-1	7	z	z
5	19	female	Finished stimuli\pefear_up_jumbledeyes.jpg	pe	fear	no	yes	1	303	-1	7	m	m
5	19	female	Finished stimuli\mf_fear_jumblednoeye.jpg	mf	fear	no	no	1	293	-1	6	z	z
5	19	female	Finished stimuli\wf_fea_jumbled_eyes.jpg	wf	fear	no	yes	0	283	-1	6	m	z
5	19	female	Finished stimuli\sw_fear_upeyes.jpg	sw	fear	yes	yes	1	442	-1	6	m	m
5	19	female	Finished stimuli\pf_hap_upeye.jpg	pf	happy	yes	yes	1	507	-1	7	m	m
5	19	female	Finished stimuli\wf_hap_jumbledeyes.jpg	wf	happy	no	yes	0	569	-1	7	m	z
5	19	female	Finished stimuli\rhap_jumbled_noeyes.jpg	rh	happy	no	no	1	444	-1	6	z	z
5	19	female	Finished stimuli\wf_hap_jumbledeyes.jpg	wf	happy	no	yes	0	405	-1	7	m	z
5	19	female	Finished stimuli\em_fear_noeyes.jpg	em	fear	yes	no	1	366	-1	6	z	z
5	19	female	Finished stimuli\wf_fea_jumbled_noeyes.jpg	wf	fear	no	no	1	170	-1	6	z	z
5	19	female	Finished stimuli\pf_fear_up_noeyes.jpg	pf	fear	yes	no	1	126	-1	7	z	z
5	19	female	Finished stimuli\mo_fear_upnoeyes.jpg	mo	fear	yes	no	1	379	-1	6	z	z
5	19	female	Finished stimuli\pehappy_upeyes.jpg	pe	happy	yes	yes	1	494	-1	6	m	m
5	19	female	Finished stimuli\sw_fear_jumbled_eyes.jpg	sw	fear	no	yes	0	149	-1	7	m	z
5	19	female	Finished stimuli\mf_happy_upeyes.jpg	mf	happy	yes	yes	1	328	-1	7	m	m
5	19	female	Finished stimuli\cc_fear_jumbledeyes.jpg	cc	fear	no	yes	1	318	-1	7	m	m
5	19	female	Finished stimuli\mf_happy_jumbledeyes.jpg	mf	happy	no	yes	0	773	-1	6	m	z
5	19	female	Finished stimuli\jjfear_jumbledeyes.jpg	jj	fear	no	yes	1	361	-1	6	m	m
5	19	female	Finished stimuli\rfear_jumbled_noeyess.jpg	rf	fear	no	no	1	973	-1	6	z	z
5	19	female	Finished stimuli\pf_hap_jumbledeye.jpg	pf	happy	no	yes	1	401	-1	6	m	m
5	19	female	Finished stimuli\mf_fear_up_noeye.jpg	mf	fear	yes	no	1	379	-1	6	z	z
5	19	female	Finished stimuli\em_hap_jumbledeyes.jpg	em	happy	no	yes	0	406	-1	7	m	z
5	19	female	Finished stimuli\cc_fear_noeyes.jpg	cc	fear	yes	no	1	320	-1	7	z	z
5	19	female	Finished stimuli\pf_fear_upeyes.jpg	pf	fear	yes	yes	1	286	-1	6	m	m
5	19	female	Finished stimuli\rhap.jpg	rh	happy	yes	yes	1	341	-1	7	m	m
5	19	female	Finished stimuli\pefear_upeyes.jpg	pe	fear	yes	yes	1	266	-1	7	m	m
5	19	female	Finished stimuli\mo_fear_jumbledeyes.jpg	mo	fear	no	yes	0	434	-1	7	m	z
5	19	female	Finished stimuli\sw_hap_jumbledeyes.jpg	sw	happy	no	yes	1	587	-1	7	m	m
5	19	female	Finished stimuli\rfear_upeys.jpg	rf	fear	yes	yes	1	286	-1	7	m	m
5	19	female	Finished stimuli\mo_fear_jumblednoeyes.jpg	mo	fear	no	no	1	477	-1	6	z	z
5	19	female	Finished stimuli\pf_hap_upeye.jpg	pf	happy	yes	yes	1	268	-1	6	m	m
5	19	female	Finished stimuli\pf_fear_jumbled_noeyes.jpg	pf	fear	no	no	1	332	-1	6	z	z
5	19	female	Finished stimuli\rhap_jumbledeyes.jpg	rh	happy	no	yes	0	529	-1	7	m	z
5	19	female	Finished stimuli\rfear_up_noeys.jpg	rf	fear	yes	no	1	503	-1	7	z	z
5	19	female	Finished stimuli\mo_hap_upeyes.jpg	mo	happy	yes	yes	1	397	-1	6	m	m
5	19	female	Finished stimuli\rfear_jumbledeyess.jpg	rf	fear	no	yes	0	696	-1	7	m	z
5	19	female	Finished stimuli\wf_hap_up_noeyes.jpg	wf	happy	yes	no	1	350	-1	7	z	z
5	19	female	Finished stimuli\sw_fear_jumbled_noeyes.jpg	sw	fear	no	no	1	363	-1	7	z	z
5	19	female	Finished stimuli\pehappy_jumbled_no_eyes.jpg	pe	happy	no	no	1	396	-1	7	z	z
5	19	female	Finished stimuli\cc_happy_jumbledeyes.jpg	cc	happy	no	yes	0	326	-1	6	m	z
5	19	female	Finished stimuli\wf_hap_jumbled_noeyes.jpg	wf	happy	no	no	1	267	-1	7	z	z
5	19	female	Finished stimuli\pf_hap_jumbled_noeye.jpg	pf	happy	no	no	1	491	-1	6	z	z
5	19	female	Finished stimuli\jjfear_upeyes.jpg	jj	fear	yes	yes	1	362	-1	7	m	m
5	19	female	Finished stimuli\JJhappyjumblednoeyes.jpg	JJ	happy	no	no	1	502	-1	7	z	z
5	19	female	Finished stimuli\sw_hap_noeyes.jpg	sw	happy	yes	no	1	333	-1	6	z	z
5	19	female	Finished stimuli\cc_happy_upeyes.jpg	cc	happy	yes	yes	1	369	-1	6	m	m
5	19	female	Finished stimuli\rhap_noeyes.jpg	rh	happy	yes	no	1	365	-1	6	z	z
5	19	female	Finished stimuli\cc_fear_up.jpg	cc	fear	yes	yes	1	337	-1	7	m	m
5	19	female	Finished stimuli\mo_hap_jumblednoeyes.jpg	mo	happy	no	no	1	286	-1	6	z	z
5	19	female	Finished stimuli\em_hap_noeyes.jpg	em	happy	yes	no	1	373	-1	6	z	z
5	19	female	Finished stimuli\pehappy_jumbled_eyes.jpg	pe	happy	no	yes	0	441	-1	6	m	z
5	19	female	Finished stimuli\jjfear_jumblednoeyes.jpg	jj	fear	no	no	1	330	-1	7	z	z
5	19	female	Finished stimuli\em_fear_jumbledeyes.jpg	em	fear	no	yes	0	423	-1	7	m	z
5	19	female	Finished stimuli\cc_fearjumbledno_eye.jpg	cc	fear	no	no	1	369	-1	7	z	z
5	19	female	Finished stimuli\mf_fear_jumblednoeye.jpg	mf	fear	no	no	1	453	-1	6	z	z
5	19	female	Finished stimuli\cc_happy_jumblednoeyes.jpg	cc	happy	no	no	1	382	-1	7	z	z
5	19	female	Finished stimuli\sw_fear_noeyes.jpg	sw	fear	yes	no	1	337	-1	6	z	z
5	19	female	Finished stimuli\mf_fear_jumbledeye.jpg	mf	fear	no	yes	1	462	-1	7	m	m
5	19	female	Finished stimuli\jjhap_jumbledeyes.jpg	jj	happy	no	yes	1	349	-1	7	m	m
5	19	female	Finished stimuli\JJhappyupnoeyes.jpg	JJ	happy	yes	no	1	177	-1	7	z	z
5	19	female	Finished stimuli\em_fear_upeyes.jpg	em	fear	yes	yes	1	308	-1	7	m	m
5	19	female	Finished stimuli\wf_hap_upeyes.jpg	wf	happy	yes	yes	1	746	-1	7	m	m
5	19	female	Finished stimuli\sw_hap_upeyes.jpg	sw	happy	yes	yes	1	311	-1	6	m	m
5	19	female	Finished stimuli\mo_fear_upeyes.jpg	mo	fear	yes	yes	1	333	-1	7	m	m
5	19	female	Finished stimuli\pefear_up_jumbled_noeyes.jpg	pe	fear	no	no	1	553	-1	6	z	z
5	19	female	Finished stimuli\mo_hap_up_noeyes.jpg	mo	happy	yes	no	1	446	-1	7	z	z
5	19	female	Finished stimuli\sw_hap_jumbled_noeyes.jpg	sw	happy	no	no	1	341	-1	6	z	z
5	19	female	Finished stimuli\pefear_up_noeyes.jpg	pe	fear	yes	no	1	369	-1	7	z	z
5	19	female	Finished stimuli\pefear_up_jumbledeyes.jpg	pe	fear	no	yes	1	421	-1	7	m	m
5	19	female	Finished stimuli\JJhappyupeyes.jpg	JJ	happy	yes	yes	0	697	-1	7	m	z
5	19	female	Finished stimuli\mo_hap_jumbledeyes.jpg	mo	happy	no	yes	1	383	-1	7	m	m
5	19	female	Finished stimuli\wf_fea_jumbled_eyes.jpg	wf	fear	no	yes	0	331	-1	7	m	z
5	19	female	Finished stimuli\pehappy_noeyes.jpg	pe	happy	yes	no	1	360	-1	7	z	z
5	19	female	Finished stimuli\mf_happy_upno_eyes.jpg	mf	happy	yes	no	1	339	-1	6	z	z
5	19	female	Finished stimuli\em_hap_upeyes.jpg	em	happy	yes	yes	0	360	-1	6	m	z
5	19	female	Finished stimuli\pf_fear_jumbledeyes.jpg	pf	fear	no	yes	0	620	-1	6	m	z
5	19	female	Finished stimuli\sw_fear_upeyes.jpg	sw	fear	yes	yes	1	286	-1	6	m	m
5	19	female	Finished stimuli\cc_happy_upnoeyes.jpg	cc	happy	yes	no	1	325	-1	6	z	z
5	19	female	Finished stimuli\jjfear_upnoeyes.jpg	jj	fear	yes	no	1	330	-1	7	z	z
5	19	female	Finished stimuli\mf_happy_jumbled_noeyes.jpg	mf	happy	no	no	1	431	-1	7	z	z
5	19	female	Finished stimuli\wf_fea_up eyes.jpg	wf	fear	yes	yes	1	391	-1	6	m	m
5	19	female	Finished stimuli\em_fear_jumblednoeyes.jpg	em	fear	no	no	1	466	-1	7	z	z
5	19	female	Finished stimuli\pf_hap_up_noeye.jpg	pf	happy	yes	no	1	314	-1	7	z	z
5	19	female	Finished stimuli\wf_fea_up_noeyes.jpg	wf	fear	yes	no	1	567	-1	7	z	z
5	19	female	Finished stimuli\em_hap_jumblednoeyes.jpg	em	happy	no	no	1	339	-1	7	z	z
5	19	female	Finished stimuli\mf_fear_upeye.jpg	mf	fear	yes	yes	1	376	-1	6	m	m
5	19	female	Finished stimuli\sw_fear_noeyes.jpg	sw	fear	yes	no	1	349	-1	6	z	z
5	19	female	Finished stimuli\em_fear_jumblednoeyes.jpg	em	fear	no	no	1	322	-1	7	z	z
5	19	female	Finished stimuli\wf_hap_upeyes.jpg	wf	happy	yes	yes	1	607	-1	7	m	m
5	19	female	Finished stimuli\cc_fear_jumbledeyes.jpg	cc	fear	no	yes	1	498	-1	6	m	m
5	19	female	Finished stimuli\mf_happy_upno_eyes.jpg	mf	happy	yes	no	1	328	-1	6	z	z
5	19	female	Finished stimuli\mo_fear_upnoeyes.jpg	mo	fear	yes	no	1	469	-1	6	z	z
5	19	female	Finished stimuli\pf_fear_jumbled_noeyes.jpg	pf	fear	no	no	1	261	-1	6	z	z
5	19	female	Finished stimuli\em_hap_noeyes.jpg	em	happy	yes	no	1	181	-1	6	z	z
5	19	female	Finished stimuli\cc_happy_jumbledeyes.jpg	cc	happy	no	yes	0	167	-1	6	m	z
5	19	female	Finished stimuli\em_hap_upeyes.jpg	em	happy	yes	yes	0	323	-1	7	m	z
5	19	female	Finished stimuli\rfear_up_noeys.jpg	rf	fear	yes	no	1	305	-1	7	z	z
5	19	female	Finished stimuli\mf_fear_jumbledeye.jpg	mf	fear	no	yes	0	487	-1	7	m	z
5	19	female	Finished stimuli\jjfear_jumblednoeyes.jpg	jj	fear	no	no	1	294	-1	7	z	z
5	19	female	Finished stimuli\pf_fear_up_noeyes.jpg	pf	fear	yes	no	1	316	-1	7	z	z
5	19	female	Finished stimuli\mf_happy_jumbled_noeyes.jpg	mf	happy	no	no	1	314	-1	7	z	z
5	19	female	Finished stimuli\wf_hap_jumbled_noeyes.jpg	wf	happy	no	no	1	215	-1	7	z	z
5	19	female	Finished stimuli\mo_hap_upeyes.jpg	mo	happy	yes	yes	1	297	-1	6	m	m
5	19	female	Finished stimuli\sw_fear_upeyes.jpg	sw	fear	yes	yes	1	360	-1	7	m	m
5	19	female	Finished stimuli\sw_fear_jumbled_noeyes.jpg	sw	fear	no	no	1	380	-1	7	z	z
5	19	female	Finished stimuli\mf_happy_upeyes.jpg	mf	happy	yes	yes	1	254	-1	6	m	m
5	19	female	Finished stimuli\pf_fear_jumbledeyes.jpg	pf	fear	no	yes	0	631	-1	7	m	z
5	19	female	Finished stimuli\mf_fear_up_noeye.jpg	mf	fear	yes	no	1	311	-1	7	z	z
5	19	female	Finished stimuli\pf_hap_jumbledeye.jpg	pf	happy	no	yes	0	277	-1	6	m	z
5	19	female	Finished stimuli\JJhappyupeyes.jpg	JJ	happy	yes	yes	1	356	-1	7	m	m
5	19	female	Finished stimuli\pf_hap_upeye.jpg	pf	happy	yes	yes	1	409	-1	7	m	m
5	19	female	Finished stimuli\rhap_jumbled_noeyes.jpg	rh	happy	no	no	1	235	-1	7	z	z
5	19	female	Finished stimuli\mf_fear_jumblednoeye.jpg	mf	fear	no	no	1	347	-1	6	z	z
5	19	female	Finished stimuli\mf_happy_jumbledeyes.jpg	mf	happy	no	yes	0	439	-1	6	m	z
5	19	female	Finished stimuli\pehappy_upeyes.jpg	pe	happy	yes	yes	1	439	-1	7	m	m
5	19	female	Finished stimuli\pefear_up_noeyes.jpg	pe	fear	yes	no	1	159	-1	6	z	z
5	19	female	Finished stimuli\pefear_up_jumbledeyes.jpg	pe	fear	no	yes	0	411	-1	6	m	z
5	19	female	Finished stimuli\sw_hap_jumbledeyes.jpg	sw	happy	no	yes	0	293	-1	7	m	z
5	19	female	Finished stimuli\jjhap_jumbledeyes.jpg	jj	happy	no	yes	0	363	-1	7	m	z
5	19	female	Finished stimuli\sw_fear_jumbled_eyes.jpg	sw	fear	no	yes	0	743	-1	7	m	z
5	19	female	Finished stimuli\pehappy_noeyes.jpg	pe	happy	yes	no	1	452	-1	6	z	z
5	19	female	Finished stimuli\pefear_upeyes.jpg	pe	fear	yes	yes	1	581	-1	7	m	m
5	19	female	Finished stimuli\mo_fear_upeyes.jpg	mo	fear	yes	yes	0	336	-1	7	m	z
5	19	female	Finished stimuli\pf_hap_up_noeye.jpg	pf	happy	yes	no	1	773	-1	6	z	z
5	19	female	Finished stimuli\jjfear_upeyes.jpg	jj	fear	yes	yes	1	425	-1	6	m	m
5	19	female	Finished stimuli\JJhappyjumblednoeyes.jpg	JJ	happy	no	no	1	562	-1	7	z	z
5	19	female	Finished stimuli\pefear_up_jumbled_noeyes.jpg	pe	fear	no	no	1	438	-1	6	z	z
5	19	female	Finished stimuli\mo_fear_jumblednoeyes.jpg	mo	fear	no	no	1	199	-1	7	z	z
5	19	female	Finished stimuli\rhap_jumbledeyes.jpg	rh	happy	no	yes	0	410	-1	6	m	z
5	19	female	Finished stimuli\pehappy_jumbled_no_eyes.jpg	pe	happy	no	no	1	340	-1	7	z	z
5	19	female	Finished stimuli\wf_hap_jumbledeyes.jpg	wf	happy	no	yes	0	513	-1	6	m	z
5	19	female	Finished stimuli\sw_hap_jumbled_noeyes.jpg	sw	happy	no	no	1	326	-1	7	z	z
5	19	female	Finished stimuli\em_hap_jumblednoeyes.jpg	em	happy	no	no	1	322	-1	7	z	z
5	19	female	Finished stimuli\rfear_jumbledeyess.jpg	rf	fear	no	yes	0	120	-1	7	m	z
5	19	female	Finished stimuli\pf_hap_jumbled_noeye.jpg	pf	happy	no	no	1	181	-1	7	z	z
5	19	female	Finished stimuli\cc_fear_noeyes.jpg	cc	fear	yes	no	1	257	-1	7	z	z
5	19	female	Finished stimuli\rhap_noeyes.jpg	rh	happy	yes	no	1	369	-1	6	z	z
5	19	female	Finished stimuli\em_fear_noeyes.jpg	em	fear	yes	no	1	357	-1	6	z	z
5	19	female	Finished stimuli\jjfear_jumbledeyes.jpg	jj	fear	no	yes	0	449	-1	7	m	z
5	19	female	Finished stimuli\em_fear_upeyes.jpg	em	fear	yes	yes	1	314	-1	6	m	m
5	19	female	Finished stimuli\mo_hap_up_noeyes.jpg	mo	happy	yes	no	1	400	-1	7	z	z
5	19	female	Finished stimuli\mf_fear_upeye.jpg	mf	fear	yes	yes	1	306	-1	7	m	m
5	19	female	Finished stimuli\wf_hap_up_noeyes.jpg	wf	happy	yes	no	1	512	-1	7	z	z
5	19	female	Finished stimuli\pf_fear_upeyes.jpg	pf	fear	yes	yes	1	366	-1	7	m	m
5	19	female	Finished stimuli\rfear_upeys.jpg	rf	fear	yes	yes	1	289	-1	7	m	m
5	19	female	Finished stimuli\wf_fea_up eyes.jpg	wf	fear	yes	yes	1	353	-1	7	m	m
5	19	female	Finished stimuli\em_hap_jumbledeyes.jpg	em	happy	no	yes	0	317	-1	6	m	z
5	19	female	Finished stimuli\jjfear_upnoeyes.jpg	jj	fear	yes	no	1	307	-1	6	z	z
5	19	female	Finished stimuli\wf_fea_jumbled_eyes.jpg	wf	fear	no	yes	0	297	-1	7	m	z
5	19	female	Finished stimuli\pehappy_jumbled_eyes.jpg	pe	happy	no	yes	0	408	-1	6	m	z
5	19	female	Finished stimuli\mo_hap_jumblednoeyes.jpg	mo	happy	no	no	1	299	-1	7	z	z
5	19	female	Finished stimuli\cc_happy_upnoeyes.jpg	cc	happy	yes	no	1	249	-1	6	z	z
5	19	female	Finished stimuli\em_fear_jumbledeyes.jpg	em	fear	no	yes	0	321	-1	7	m	z
5	19	female	Finished stimuli\cc_fear_up.jpg	cc	fear	yes	yes	1	390	-1	7	m	m
5	19	female	Finished stimuli\rhap.jpg	rh	happy	yes	yes	1	330	-1	7	m	m
5	19	female	Finished stimuli\cc_fearjumbledno_eye.jpg	cc	fear	no	no	1	423	-1	7	z	z
5	19	female	Finished stimuli\cc_happy_upeyes.jpg	cc	happy	yes	yes	1	273	-1	7	m	m
5	19	female	Finished stimuli\wf_fea_jumbled_noeyes.jpg	wf	fear	no	no	1	432	-1	7	z	z
5	19	female	Finished stimuli\cc_happy_jumblednoeyes.jpg	cc	happy	no	no	1	330	-1	7	z	z
5	19	female	Finished stimuli\sw_hap_noeyes.jpg	sw	happy	yes	no	1	399	-1	6	z	z
5	19	female	Finished stimuli\JJhappyupnoeyes.jpg	JJ	happy	yes	no	1	296	-1	6	z	z
5	19	female	Finished stimuli\wf_fea_up_noeyes.jpg	wf	fear	yes	no	1	215	-1	7	z	z
5	19	female	Finished stimuli\sw_hap_upeyes.jpg	sw	happy	yes	yes	1	240	-1	7	m	m
5	19	female	Finished stimuli\mo_hap_jumbledeyes.jpg	mo	happy	no	yes	0	154	-1	7	m	z
5	19	female	Finished stimuli\rfear_jumbled_noeyess.jpg	rf	fear	no	no	1	334	-1	6	z	z
5	19	female	Finished stimuli\mo_fear_jumbledeyes.jpg	mo	fear	no	yes	0	315	-1	6	m	z
2	18	female	Finished stimuli\jjfear_upnoeyes.jpg	jj	fear	yes	no	0	380	-1	6	m	z
2	18	female	Finished stimuli\mf_fear_jumblednoeye.jpg	mf	fear	no	no	0	378	-1	7	m	z
2	18	female	Finished stimuli\wf_fea_jumbled_noeyes.jpg	wf	fear	no	no	0	529	-1	7	m	z
2	18	female	Finished stimuli\mf_happy_jumbledeyes.jpg	mf	happy	no	yes	1	480	-1	7	z	z
2	18	female	Finished stimuli\sw_hap_upeyes.jpg	sw	happy	yes	yes	1	647	-1	6	z	z
2	18	female	Finished stimuli\pf_fear_jumbledeyes.jpg	pf	fear	no	yes	1	528	-1	7	z	z
2	18	female	Finished stimuli\mo_hap_upeyes.jpg	mo	happy	yes	yes	1	821	-1	6	z	z
2	18	female	Finished stimuli\mo_hap_jumblednoeyes.jpg	mo	happy	no	no	0	679	-1	6	m	z
2	18	female	Finished stimuli\sw_hap_jumbledeyes.jpg	sw	happy	no	yes	1	550	-1	7	z	z
2	18	female	Finished stimuli\cc_happy_jumbledeyes.jpg	cc	happy	no	yes	1	611	-1	6	z	z
2	18	female	Finished stimuli\cc_fear_noeyes.jpg	cc	fear	yes	no	1	629	-1	6	m	m
2	18	female	Finished stimuli\jjhap_jumbledeyes.jpg	jj	happy	no	yes	1	766	-1	7	z	z
2	18	female	Finished stimuli\rhap_jumbledeyes.jpg	rh	happy	no	yes	1	778	-1	7	z	z
2	18	female	Finished stimuli\mo_fear_jumbledeyes.jpg	mo	fear	no	yes	1	702	-1	7	z	z
2	18	female	Finished stimuli\cc_happy_upnoeyes.jpg	cc	happy	yes	no	0	972	-1	7	m	z
2	18	female	Finished stimuli\JJhappyupeyes.jpg	JJ	happy	yes	yes	1	800	-1	7	z	z
2	18	female	Finished stimuli\sw_hap_noeyes.jpg	sw	happy	yes	no	1	818	-1	6	m	m
2	18	female	Finished stimuli\rfear_jumbledeyess.jpg	rf	fear	no	yes	1	484	-1	7	z	z
2	18	female	Finished stimuli\jjfear_jumbledeyes.jpg	jj	fear	no	yes	1	571	-1	7	z	z
2	18	female	Finished stimuli\pf_hap_jumbled_noeye.jpg	pf	happy	no	no	0	415	-1	7	m	z
2	18	female	Finished stimuli\rfear_up_noeys.jpg	rf	fear	yes	no	1	865	-1	7	m	m
2	18	female	Finished stimuli\pehappy_upeyes.jpg	pe	happy	yes	yes	0	817	-1	7	z	m
2	18	female	Finished stimuli\mf_happy_jumbled_noeyes.jpg	mf	happy	no	no	0	698	-1	6	m	z
2	18	female	Finished stimuli\mf_happy_upeyes.jpg	mf	happy	yes	yes	1	664	-1	6	z	z
2	18	female	Finished stimuli\em_hap_noeyes.jpg	em	happy	yes	no	0	240	-1	6	m	z
2	18	female	Finished stimuli\wf_hap_upeyes.jpg	wf	happy	yes	yes	0	729	-1	7	z	m
2	18	female	Finished stimuli\em_hap_jumblednoeyes.jpg	em	happy	no	no	0	751	-1	7	m	z
2	18	female	Finished stimuli\pf_hap_upeye.jpg	pf	happy	yes	yes	1	571	-1	7	z	z
2	18	female	Finished stimuli\jjfear_upeyes.jpg	jj	fear	yes	yes	1	1055	-1	7	z	z
2	18	female	Finished stimuli\pf_hap_up_noeye.jpg	pf	happy	yes	no	1	704	-1	6	m	m
2	18	female	Finished stimuli\mf_happy_upno_eyes.jpg	mf	happy	yes	no	0	901	-1	6	m	z
2	18	female	Finished stimuli\sw_hap_jumbled_noeyes.jpg	sw	happy	no	no	0	971	-1	7	m	z
2	18	female	Finished stimuli\em_hap_jumbledeyes.jpg	em	happy	no	yes	1	903	-1	7	z	z
2	18	female	Finished stimuli\cc_fear_jumbledeyes.jpg	cc	fear	no	yes	0	925	-1	7	z	m
2	18	female	Finished stimuli\mo_fear_upeyes.jpg	mo	fear	yes	yes	1	1107	-1	6	z	z
2	18	female	Finished stimuli\sw_fear_jumbled_eyes.jpg	sw	fear	no	yes	0	754	-1	7	z	m
2	18	female	Finished stimuli\pefear_upeyes.jpg	pe	fear	yes	yes	0	878	-1	7	z	m
2	18	female	Finished stimuli\wf_hap_jumbledeyes.jpg	wf	happy	no	yes	1	1070	-1	7	z	z
2	18	female	Finished stimuli\JJhappyjumblednoeyes.jpg	JJ	happy	no	no	0	1286	-1	6	m	z
2	18	female	Finished stimuli\pf_fear_up_noeyes.jpg	pf	fear	yes	no	1	686	-1	7	m	m
2	18	female	Finished stimuli\pf_fear_upeyes.jpg	pf	fear	yes	yes	1	501	-1	6	z	z
2	18	female	Finished stimuli\em_hap_upeyes.jpg	em	happy	yes	yes	1	436	-1	7	z	z
2	18	female	Finished stimuli\cc_happy_jumblednoeyes.jpg	cc	happy	no	no	1	677	-1	7	m	m
2	18	female	Finished stimuli\cc_fearjumbledno_eye.jpg	cc	fear	no	no	0	636	-1	6	m	z
2	18	female	Finished stimuli\cc_happy_upeyes.jpg	cc	happy	yes	yes	0	724	-1	7	z	m
2	18	female	Finished stimuli\em_fear_noeyes.jpg	em	fear	yes	no	1	602	-1	7	m	m
2	18	female	Finished stimuli\mo_hap_up_noeyes.jpg	mo	happy	yes	no	0	484	-1	7	m	z
2	18	female	Finished stimuli\pehappy_jumbled_eyes.jpg	pe	happy	no	yes	1	668	-1	7	z	z
2	18	female	Finished stimuli\pehappy_noeyes.jpg	pe	happy	yes	no	0	620	-1	7	m	z
2	18	female	Finished stimuli\mo_hap_jumbledeyes.jpg	mo	happy	no	yes	1	774	-1	7	z	z
2	18	female	Finished stimuli\rfear_upeys.jpg	rf	fear	yes	yes	1	786	-1	7	z	z
2	18	female	Finished stimuli\wf_fea_jumbled_eyes.jpg	wf	fear	no	yes	1	621	-1	6	z	z
2	18	female	Finished stimuli\em_fear_jumbledeyes.jpg	em	fear	no	yes	1	535	-1	6	z	z
2	18	female	Finished stimuli\em_fear_upeyes.jpg	em	fear	yes	yes	1	812	-1	7	z	z
2	18	female	Finished stimuli\rhap.jpg	rh	happy	yes	yes	1	534	-1	7	z	z
2	18	female	Finished stimuli\wf_fea_up_noeyes.jpg	wf	fear	yes	no	0	684	-1	7	m	z
2	18	female	Finished stimuli\wf_fea_up eyes.jpg	wf	fear	yes	yes	0	1307	-1	6	z	m
2	18	female	Finished stimuli\mf_fear_jumbledeye.jpg	mf	fear	no	yes	1	753	-1	6	z	z
2	18	female	Finished stimuli\mf_fear_up_noeye.jpg	mf	fear	yes	no	0	677	-1	6	m	z
2	18	female	Finished stimuli\rfear_jumbled_noeyess.jpg	rf	fear	no	no	1	692	-1	7	m	m
2	18	female	Finished stimuli\mf_fear_upeye.jpg	mf	fear	yes	yes	1	706	-1	7	z	z
2	18	female	Finished stimuli\pefear_up_jumbledeyes.jpg	pe	fear	no	yes	1	600	-1	6	z	z
2	18	female	Finished stimuli\sw_fear_noeyes.jpg	sw	fear	yes	no	0	923	-1	7	m	z
2	18	female	Finished stimuli\pefear_up_jumbled_noeyes.jpg	pe	fear	no	no	0	561	-1	6	m	z
2	18	female	Finished stimuli\pf_hap_jumbledeye.jpg	pf	happy	no	yes	1	877	-1	6	z	z
2	18	female	Finished stimuli\pefear_up_noeyes.jpg	pe	fear	yes	no	0	675	-1	6	m	z
2	18	female	Finished stimuli\JJhappyupnoeyes.jpg	JJ	happy	yes	no	1	553	-1	6	m	m
2	18	female	Finished stimuli\wf_hap_jumbled_noeyes.jpg	wf	happy	no	no	1	510	-1	7	m	m
2	18	female	Finished stimuli\pehappy_jumbled_no_eyes.jpg	pe	happy	no	no	1	444	-1	7	m	m
2	18	female	Finished stimuli\mo_fear_jumblednoeyes.jpg	mo	fear	no	no	1	380	-1	6	m	m
2	18	female	Finished stimuli\pf_fear_jumbled_noeyes.jpg	pf	fear	no	no	0	383	-1	7	m	z
2	18	female	Finished stimuli\sw_fear_jumbled_noeyes.jpg	sw	fear	no	no	0	539	-1	7	m	z
2	18	female	Finished stimuli\em_fear_jumblednoeyes.jpg	em	fear	no	no	1	472	-1	7	m	m
2	18	female	Finished stimuli\jjfear_jumblednoeyes.jpg	jj	fear	no	no	1	480	-1	7	m	m
2	18	female	Finished stimuli\rhap_noeyes.jpg	rh	happy	yes	no	1	335	-1	6	m	m
2	18	female	Finished stimuli\rhap_jumbled_noeyes.jpg	rh	happy	no	no	1	212	-1	6	m	m
2	18	female	Finished stimuli\mo_fear_upnoeyes.jpg	mo	fear	yes	no	0	582	-1	6	m	z
2	18	female	Finished stimuli\sw_fear_upeyes.jpg	sw	fear	yes	yes	1	568	-1	7	z	z
2	18	female	Finished stimuli\wf_hap_up_noeyes.jpg	wf	happy	yes	no	0	540	-1	6	m	z
2	18	female	Finished stimuli\cc_fear_up.jpg	cc	fear	yes	yes	1	466	-1	7	z	z
2	18	female	Finished stimuli\mo_fear_upnoeyes.jpg	mo	fear	yes	no	1	545	-1	7	m	m
2	18	female	Finished stimuli\sw_hap_noeyes.jpg	sw	happy	yes	no	0	590	-1	6	m	z
2	18	female	Finished stimuli\em_fear_jumbledeyes.jpg	em	fear	no	yes	1	649	-1	6	z	z
2	18	female	Finished stimuli\cc_happy_jumbledeyes.jpg	cc	happy	no	yes	1	378	-1	7	z	z
2	18	female	Finished stimuli\mo_fear_jumbledeyes.jpg	mo	fear	no	yes	1	589	-1	6	z	z
2	18	female	Finished stimuli\rhap_jumbled_noeyes.jpg	rh	happy	no	no	0	560	-1	7	m	z
2	18	female	Finished stimuli\wf_fea_jumbled_noeyes.jpg	wf	fear	no	no	1	724	-1	7	m	m
2	18	female	Finished stimuli\rfear_jumbled_noeyess.jpg	rf	fear	no	no	1	538	-1	7	m	m
2	18	female	Finished stimuli\jjhap_jumbledeyes.jpg	jj	happy	no	yes	1	504	-1	7	z	z
2	18	female	Finished stimuli\sw_fear_upeyes.jpg	sw	fear	yes	yes	1	358	-1	6	z	z
2	18	female	Finished stimuli\JJhappyupeyes.jpg	JJ	happy	yes	yes	1	522	-1	6	z	z
2	18	female	Finished stimuli\rfear_jumbledeyess.jpg	rf	fear	no	yes	1	392	-1	6	z	z
2	18	female	Finished stimuli\mf_fear_upeye.jpg	mf	fear	yes	yes	1	594	-1	7	z	z
2	18	female	Finished stimuli\rhap_noeyes.jpg	rh	happy	yes	no	1	733	-1	7	m	m
2	18	female	Finished stimuli\wf_fea_up eyes.jpg	wf	fear	yes	yes	1	602	-1	7	z	z
2	18	female	Finished stimuli\sw_fear_jumbled_eyes.jpg	sw	fear	no	yes	1	548	-1	7	z	z
2	18	female	Finished stimuli\mf_happy_jumbledeyes.jpg	mf	happy	no	yes	1	599	-1	7	z	z
2	18	female	Finished stimuli\mf_happy_upeyes.jpg	mf	happy	yes	yes	1	545	-1	7	z	z
2	18	female	Finished stimuli\cc_fear_up.jpg	cc	fear	yes	yes	1	534	-1	6	z	z
2	18	female	Finished stimuli\wf_fea_jumbled_eyes.jpg	wf	fear	no	yes	1	595	-1	7	z	z
2	18	female	Finished stimuli\pf_hap_up_noeye.jpg	pf	happy	yes	no	0	550	-1	6	m	z
2	18	female	Finished stimuli\em_hap_jumblednoeyes.jpg	em	happy	no	no	0	499	-1	7	m	z
2	18	female	Finished stimuli\em_fear_jumblednoeyes.jpg	em	fear	no	no	0	553	-1	6	m	z
2	18	female	Finished stimuli\mf_happy_jumbled_noeyes.jpg	mf	happy	no	no	0	533	-1	6	m	z
2	18	female	Finished stimuli\sw_hap_upeyes.jpg	sw	happy	yes	yes	1	394	-1	7	z	z
2	18	female	Finished stimuli\jjfear_upeyes.jpg	jj	fear	yes	yes	1	517	-1	6	z	z
2	18	female	Finished stimuli\mo_fear_upeyes.jpg	mo	fear	yes	yes	1	371	-1	7	z	z
2	18	female	Finished stimuli\pefear_upeyes.jpg	pe	fear	yes	yes	1	519	-1	7	z	z
2	18	female	Finished stimuli\pf_fear_jumbled_noeyes.jpg	pf	fear	no	no	0	461	-1	7	m	z
2	18	female	Finished stimuli\sw_fear_noeyes.jpg	sw	fear	yes	no	0	557	-1	7	m	z
2	18	female	Finished stimuli\rfear_up_noeys.jpg	rf	fear	yes	no	1	393	-1	6	m	m
2	18	female	Finished stimuli\jjfear_jumblednoeyes.jpg	jj	fear	no	no	1	532	-1	7	m	m
2	18	female	Finished stimuli\rhap.jpg	rh	happy	yes	yes	0	656	-1	6	z	m
2	18	female	Finished stimuli\mo_hap_upeyes.jpg	mo	happy	yes	yes	1	328	-1	6	z	z
2	18	female	Finished stimuli\pefear_up_jumbledeyes.jpg	pe	fear	no	yes	1	341	-1	6	z	z
2	18	female	Finished stimuli\mo_hap_jumbledeyes.jpg	mo	happy	no	yes	1	354	-1	7	z	z
2	18	female	Finished stimuli\cc_happy_jumblednoeyes.jpg	cc	happy	no	no	1	558	-1	7	m	m
2	18	female	Finished stimuli\mf_fear_jumblednoeye.jpg	mf	fear	no	no	0	498	-1	7	m	z
2	18	female	Finished stimuli\sw_fear_jumbled_noeyes.jpg	sw	fear	no	no	0	664	-1	6	m	z
2	18	female	Finished stimuli\pf_fear_upeyes.jpg	pf	fear	yes	yes	1	360	-1	6	z	z
2	18	female	Finished stimuli\em_hap_noeyes.jpg	em	happy	yes	no	1	372	-1	6	m	m
2	18	female	Finished stimuli\pehappy_jumbled_no_eyes.jpg	pe	happy	no	no	1	400	-1	7	m	m
2	18	female	Finished stimuli\JJhappyupnoeyes.jpg	JJ	happy	yes	no	1	529	-1	6	m	m
2	18	female	Finished stimuli\em_hap_jumbledeyes.jpg	em	happy	no	yes	0	358	-1	7	z	m
2	18	female	Finished stimuli\mf_fear_jumbledeye.jpg	mf	fear	no	yes	1	314	-1	7	z	z
2	18	female	Finished stimuli\cc_fear_noeyes.jpg	cc	fear	yes	no	1	351	-1	7	m	m
2	18	female	Finished stimuli\pf_hap_jumbledeye.jpg	pf	happy	no	yes	1	332	-1	6	z	z
2	18	female	Finished stimuli\wf_hap_jumbled_noeyes.jpg	wf	happy	no	no	1	329	-1	6	m	m
2	18	female	Finished stimuli\sw_hap_jumbled_noeyes.jpg	sw	happy	no	no	1	309	-1	6	m	m
2	18	female	Finished stimuli\wf_hap_upeyes.jpg	wf	happy	yes	yes	1	303	-1	6	z	z
2	18	female	Finished stimuli\wf_hap_up_noeyes.jpg	wf	happy	yes	no	1	357	-1	7	m	m
2	18	female	Finished stimuli\rhap_jumbledeyes.jpg	rh	happy	no	yes	1	481	-1	6	z	z
2	18	female	Finished stimuli\mf_fear_up_noeye.jpg	mf	fear	yes	no	1	560	-1	7	m	m
2	18	female	Finished stimuli\pf_hap_jumbled_noeye.jpg	pf	happy	no	no	1	380	-1	7	m	m
2	18	female	Finished stimuli\mo_hap_up_noeyes.jpg	mo	happy	yes	no	0	359	-1	7	m	z
2	18	female	Finished stimuli\mf_happy_upno_eyes.jpg	mf	happy	yes	no	0	506	-1	6	m	z
2	18	female	Finished stimuli\mo_hap_jumblednoeyes.jpg	mo	happy	no	no	1	385	-1	7	m	m
2	18	female	Finished stimuli\pefear_up_jumbled_noeyes.jpg	pe	fear	no	no	1	764	-1	7	m	m
2	18	female	Finished stimuli\cc_happy_upeyes.jpg	cc	happy	yes	yes	1	424	-1	7	z	z
2	18	female	Finished stimuli\pehappy_upeyes.jpg	pe	happy	yes	yes	1	506	-1	7	z	z
2	18	female	Finished stimuli\em_fear_noeyes.jpg	em	fear	yes	no	1	512	-1	7	m	m
2	18	female	Finished stimuli\pehappy_jumbled_eyes.jpg	pe	happy	no	yes	1	398	-1	7	z	z
2	18	female	Finished stimuli\rfear_upeys.jpg	rf	fear	yes	yes	1	393	-1	7	z	z
2	18	female	Finished stimuli\wf_fea_up_noeyes.jpg	wf	fear	yes	no	1	435	-1	7	m	m
2	18	female	Finished stimuli\sw_hap_jumbledeyes.jpg	sw	happy	no	yes	1	485	-1	7	z	z
2	18	female	Finished stimuli\pf_fear_up_noeyes.jpg	pf	fear	yes	no	1	348	-1	7	m	m
2	18	female	Finished stimuli\pf_fear_jumbledeyes.jpg	pf	fear	no	yes	1	504	-1	7	z	z
2	18	female	Finished stimuli\mo_fear_jumblednoeyes.jpg	mo	fear	no	no	1	527	-1	6	m	m
2	18	female	Finished stimuli\pf_hap_upeye.jpg	pf	happy	yes	yes	1	811	-1	7	z	z
2	18	female	Finished stimuli\jjfear_upnoeyes.jpg	jj	fear	yes	no	0	949	-1	7	m	z
2	18	female	Finished stimuli\wf_hap_jumbledeyes.jpg	wf	happy	no	yes	0	450	-1	6	z	m
2	18	female	Finished stimuli\cc_happy_upnoeyes.jpg	cc	happy	yes	no	1	451	-1	7	m	m
2	18	female	Finished stimuli\cc_fear_jumbledeyes.jpg	cc	fear	no	yes	1	595	-1	6	z	z
2	18	female	Finished stimuli\em_hap_upeyes.jpg	em	happy	yes	yes	1	606	-1	7	z	z
2	18	female	Finished stimuli\pefear_up_noeyes.jpg	pe	fear	yes	no	1	599	-1	6	m	m
2	18	female	Finished stimuli\em_fear_upeyes.jpg	em	fear	yes	yes	1	394	-1	7	z	z
2	18	female	Finished stimuli\JJhappyjumblednoeyes.jpg	JJ	happy	no	no	1	508	-1	7	m	m
2	18	female	Finished stimuli\jjfear_jumbledeyes.jpg	jj	fear	no	yes	1	410	-1	7	z	z
2	18	female	Finished stimuli\cc_fearjumbledno_eye.jpg	cc	fear	no	no	0	748	-1	6	m	z
2	18	female	Finished stimuli\pehappy_noeyes.jpg	pe	happy	yes	no	0	377	-1	7	m	z
2	18	female	Finished stimuli\sw_hap_jumbled_noeyes.jpg	sw	happy	no	no	1	601	-1	7	m	m
2	18	female	Finished stimuli\mo_fear_jumbledeyes.jpg	mo	fear	no	yes	1	291	-1	7	z	z
2	18	female	Finished stimuli\mf_fear_jumbledeye.jpg	mf	fear	no	yes	1	281	-1	6	z	z
2	18	female	Finished stimuli\rfear_upeys.jpg	rf	fear	yes	yes	1	360	-1	7	z	z
2	18	female	Finished stimuli\mf_happy_upno_eyes.jpg	mf	happy	yes	no	0	564	-1	7	m	z
2	18	female	Finished stimuli\sw_fear_jumbled_eyes.jpg	sw	fear	no	yes	1	328	-1	7	z	z
2	18	female	Finished stimuli\pf_hap_upeye.jpg	pf	happy	yes	yes	1	413	-1	7	z	z
2	18	female	Finished stimuli\rhap.jpg	rh	happy	yes	yes	1	303	-1	7	z	z
2	18	female	Finished stimuli\sw_fear_noeyes.jpg	sw	fear	yes	no	0	541	-1	6	m	z
2	18	female	Finished stimuli\rhap_jumbledeyes.jpg	rh	happy	no	yes	1	354	-1	7	z	z
2	18	female	Finished stimuli\mo_fear_jumblednoeyes.jpg	mo	fear	no	no	0	247	-1	6	m	z
2	18	female	Finished stimuli\pf_fear_up_noeyes.jpg	pf	fear	yes	no	0	439	-1	7	m	z
2	18	female	Finished stimuli\cc_fear_jumbledeyes.jpg	cc	fear	no	yes	1	377	-1	7	z	z
2	18	female	Finished stimuli\cc_fearjumbledno_eye.jpg	cc	fear	no	no	1	428	-1	6	m	m
2	18	female	Finished stimuli\pf_hap_jumbled_noeye.jpg	pf	happy	no	no	0	349	-1	6	m	z
2	18	female	Finished stimuli\em_fear_upeyes.jpg	em	fear	yes	yes	1	306	-1	7	z	z
2	18	female	Finished stimuli\pehappy_noeyes.jpg	pe	happy	yes	no	0	359	-1	6	m	z
2	18	female	Finished stimuli\mo_hap_up_noeyes.jpg	mo	happy	yes	no	0	275	-1	6	m	z
2	18	female	Finished stimuli\mo_fear_upeyes.jpg	mo	fear	yes	yes	1	242	-1	6	z	z
2	18	female	Finished stimuli\sw_hap_noeyes.jpg	sw	happy	yes	no	0	163	-1	7	m	z
2	18	female	Finished stimuli\pf_fear_jumbledeyes.jpg	pf	fear	no	yes	1	382	-1	7	z	z
2	18	female	Finished stimuli\pehappy_upeyes.jpg	pe	happy	yes	yes	1	314	-1	7	z	z
2	18	female	Finished stimuli\wf_hap_upeyes.jpg	wf	happy	yes	yes	1	208	-1	7	z	z
2	18	female	Finished stimuli\em_hap_noeyes.jpg	em	happy	yes	no	0	290	-1	6	m	z
2	18	female	Finished stimuli\cc_happy_upnoeyes.jpg	cc	happy	yes	no	0	257	-1	6	m	z
2	18	female	Finished stimuli\pefear_upeyes.jpg	pe	fear	yes	yes	1	234	-1	7	z	z
2	18	female	Finished stimuli\pf_fear_upeyes.jpg	pf	fear	yes	yes	1	267	-1	7	z	z
2	18	female	Finished stimuli\em_hap_jumblednoeyes.jpg	em	happy	no	no	0	363	-1	7	m	z
2	18	female	Finished stimuli\mf_happy_jumbled_noeyes.jpg	mf	happy	no	no	0	358	-1	7	m	z
2	18	female	Finished stimuli\rhap_jumbled_noeyes.jpg	rh	happy	no	no	1	618	-1	7	m	m
2	18	female	Finished stimuli\cc_fear_up.jpg	cc	fear	yes	yes	1	308	-1	7	z	z
2	18	female	Finished stimuli\wf_hap_jumbledeyes.jpg	wf	happy	no	yes	0	274	-1	6	z	m
2	18	female	Finished stimuli\wf_fea_up_noeyes.jpg	wf	fear	yes	no	0	338	-1	6	m	z
2	18	female	Finished stimuli\pf_hap_up_noeye.jpg	pf	happy	yes	no	1	455	-1	7	m	m
2	18	female	Finished stimuli\cc_happy_jumbledeyes.jpg	cc	happy	no	yes	0	304	-1	7	z	m
2	18	female	Finished stimuli\em_fear_jumbledeyes.jpg	em	fear	no	yes	1	326	-1	7	z	z
2	18	female	Finished stimuli\jjfear_jumbledeyes.jpg	jj	fear	no	yes	1	347	-1	7	z	z
2	18	female	Finished stimuli\sw_fear_jumbled_noeyes.jpg	sw	fear	no	no	0	271	-1	6	m	z
2	18	female	Finished stimuli\em_hap_jumbledeyes.jpg	em	happy	no	yes	1	359	-1	7	z	z
2	18	female	Finished stimuli\sw_fear_upeyes.jpg	sw	fear	yes	yes	0	435	-1	7	z	m
2	18	female	Finished stimuli\rfear_up_noeys.jpg	rf	fear	yes	no	1	468	-1	6	m	m
2	18	female	Finished stimuli\pf_fear_jumbled_noeyes.jpg	pf	fear	no	no	1	380	-1	6	m	m
2	18	female	Finished stimuli\JJhappyupnoeyes.jpg	JJ	happy	yes	no	1	950	-1	7	m	m
2	18	female	Finished stimuli\JJhappyjumblednoeyes.jpg	JJ	happy	no	no	0	355	-1	7	m	z
2	18	female	Finished stimuli\pehappy_jumbled_no_eyes.jpg	pe	happy	no	no	0	615	-1	6	m	z
2	18	female	Finished stimuli\jjfear_upeyes.jpg	jj	fear	yes	yes	1	353	-1	6	z	z
2	18	female	Finished stimuli\pehappy_jumbled_eyes.jpg	pe	happy	no	yes	0	494	-1	7	z	m
2	18	female	Finished stimuli\cc_happy_upeyes.jpg	cc	happy	yes	yes	1	268	-1	6	z	z
2	18	female	Finished stimuli\rhap_noeyes.jpg	rh	happy	yes	no	1	588	-1	6	m	m
2	18	female	Finished stimuli\sw_hap_upeyes.jpg	sw	happy	yes	yes	1	543	-1	7	z	z
2	18	female	Finished stimuli\mo_hap_jumblednoeyes.jpg	mo	happy	no	no	1	564	-1	6	m	m
2	18	female	Finished stimuli\em_fear_jumblednoeyes.jpg	em	fear	no	no	1	1064	-1	6	m	m
2	18	female	Finished stimuli\pf_hap_jumbledeye.jpg	pf	happy	no	yes	1	320	-1	6	z	z
2	18	female	Finished stimuli\jjhap_jumbledeyes.jpg	jj	happy	no	yes	1	332	-1	6	z	z
2	18	female	Finished stimuli\wf_hap_jumbled_noeyes.jpg	wf	happy	no	no	1	425	-1	7	m	m
2	18	female	Finished stimuli\mf_fear_jumblednoeye.jpg	mf	fear	no	no	1	858	-1	6	m	m
2	18	female	Finished stimuli\JJhappyupeyes.jpg	JJ	happy	yes	yes	1	354	-1	6	z	z
2	18	female	Finished stimuli\pefear_up_jumbled_noeyes.jpg	pe	fear	no	no	0	423	-1	7	m	z
2	18	female	Finished stimuli\wf_fea_jumbled_eyes.jpg	wf	fear	no	yes	1	1528	-1	7	z	z
2	18	female	Finished stimuli\wf_hap_up_noeyes.jpg	wf	happy	yes	no	1	510	-1	6	m	m
2	18	female	Finished stimuli\cc_fear_noeyes.jpg	cc	fear	yes	no	1	372	-1	6	m	m
2	18	female	Finished stimuli\rfear_jumbledeyess.jpg	rf	fear	no	yes	1	336	-1	6	z	z
2	18	female	Finished stimuli\jjfear_jumblednoeyes.jpg	jj	fear	no	no	0	485	-1	6	m	z
2	18	female	Finished stimuli\mf_fear_upeye.jpg	mf	fear	yes	yes	1	323	-1	6	z	z
2	18	female	Finished stimuli\pefear_up_jumbledeyes.jpg	pe	fear	no	yes	1	321	-1	6	z	z
2	18	female	Finished stimuli\wf_fea_jumbled_noeyes.jpg	wf	fear	no	no	1	599	-1	7	m	m
2	18	female	Finished stimuli\mo_hap_upeyes.jpg	mo	happy	yes	yes	1	257	-1	7	z	z
2	18	female	Finished stimuli\mo_fear_upnoeyes.jpg	mo	fear	yes	no	0	314	-1	6	m	z
2	18	female	Finished stimuli\rfear_jumbled_noeyess.jpg	rf	fear	no	no	1	392	-1	7	m	m
2	18	female	Finished stimuli\mf_fear_up_noeye.jpg	mf	fear	yes	no	0	586	-1	7	m	z
2	18	female	Finished stimuli\mf_happy_upeyes.jpg	mf	happy	yes	yes	1	308	-1	7	z	z
2	18	female	Finished stimuli\cc_happy_jumblednoeyes.jpg	cc	happy	no	no	0	706	-1	7	m	z
2	18	female	Finished stimuli\pefear_up_noeyes.jpg	pe	fear	yes	no	1	423	-1	6	m	m
2	18	female	Finished stimuli\em_fear_noeyes.jpg	em	fear	yes	no	1	529	-1	6	m	m
2	18	female	Finished stimuli\wf_fea_up eyes.jpg	wf	fear	yes	yes	1	422	-1	7	z	z
2	18	female	Finished stimuli\em_hap_upeyes.jpg	em	happy	yes	yes	0	496	-1	6	z	m
2	18	female	Finished stimuli\sw_hap_jumbledeyes.jpg	sw	happy	no	yes	0	487	-1	7	z	m
2	18	female	Finished stimuli\mo_hap_jumbledeyes.jpg	mo	happy	no	yes	1	774	-1	6	z	z
2	18	female	Finished stimuli\mf_happy_jumbledeyes.jpg	mf	happy	no	yes	1	329	-1	7	z	z
2	18	female	Finished stimuli\jjfear_upnoeyes.jpg	jj	fear	yes	no	0	519	-1	7	m	z
2	18	female	Finished stimuli\jjfear_jumbledeyes.jpg	jj	fear	no	yes	0	351	-1	7	z	m
2	18	female	Finished stimuli\pf_fear_jumbled_noeyes.jpg	pf	fear	no	no	1	468	-1	7	m	m
2	18	female	Finished stimuli\jjfear_jumblednoeyes.jpg	jj	fear	no	no	0	380	-1	7	m	z
2	18	female	Finished stimuli\sw_hap_noeyes.jpg	sw	happy	yes	no	0	903	-1	6	m	z
2	18	female	Finished stimuli\mf_happy_jumbledeyes.jpg	mf	happy	no	yes	1	341	-1	6	z	z
2	18	female	Finished stimuli\rfear_jumbled_noeyess.jpg	rf	fear	no	no	1	402	-1	7	m	m
2	18	female	Finished stimuli\JJhappyupeyes.jpg	JJ	happy	yes	yes	1	293	-1	7	z	z
2	18	female	Finished stimuli\pehappy_jumbled_eyes.jpg	pe	happy	no	yes	0	395	-1	7	z	m
2	18	female	Finished stimuli\JJhappyupnoeyes.jpg	JJ	happy	yes	no	1	429	-1	7	m	m
2	18	female	Finished stimuli\pf_hap_jumbledeye.jpg	pf	happy	no	yes	1	213	-1	6	z	z
2	18	female	Finished stimuli\rhap_jumbled_noeyes.jpg	rh	happy	no	no	1	551	-1	6	m	m
2	18	female	Finished stimuli\wf_fea_jumbled_eyes.jpg	wf	fear	no	yes	1	388	-1	7	z	z
2	18	female	Finished stimuli\sw_hap_upeyes.jpg	sw	happy	yes	yes	1	423	-1	7	z	z
2	18	female	Finished stimuli\em_fear_noeyes.jpg	em	fear	yes	no	1	505	-1	7	m	m
2	18	female	Finished stimuli\pehappy_noeyes.jpg	pe	happy	yes	no	0	527	-1	6	m	z
2	18	female	Finished stimuli\em_hap_jumblednoeyes.jpg	em	happy	no	no	1	389	-1	7	m	m
2	18	female	Finished stimuli\wf_fea_up eyes.jpg	wf	fear	yes	yes	1	296	-1	7	z	z
2	18	female	Finished stimuli\cc_happy_jumblednoeyes.jpg	cc	happy	no	no	1	406	-1	6	m	m
2	18	female	Finished stimuli\jjfear_upeyes.jpg	jj	fear	yes	yes	1	328	-1	7	z	z
2	18	female	Finished stimuli\wf_hap_jumbledeyes.jpg	wf	happy	no	yes	0	413	-1	6	z	m
2	18	female	Finished stimuli\pefear_up_noeyes.jpg	pe	fear	yes	no	1	446	-1	7	m	m
2	18	female	Finished stimuli\sw_hap_jumbled_noeyes.jpg	sw	happy	no	no	1	357	-1	7	m	m
2	18	female	Finished stimuli\pf_fear_upeyes.jpg	pf	fear	yes	yes	1	305	-1	7	z	z
2	18	female	Finished stimuli\sw_fear_upeyes.jpg	sw	fear	yes	yes	1	464	-1	7	z	z
2	18	female	Finished stimuli\pehappy_upeyes.jpg	pe	happy	yes	yes	0	432	-1	7	z	m
2	18	female	Finished stimuli\mf_happy_upno_eyes.jpg	mf	happy	yes	no	0	456	-1	7	m	z
2	18	female	Finished stimuli\mf_happy_jumbled_noeyes.jpg	mf	happy	no	no	1	656	-1	6	m	m
2	18	female	Finished stimuli\mo_fear_upeyes.jpg	mo	fear	yes	yes	1	305	-1	7	z	z
2	18	female	Finished stimuli\em_fear_jumbledeyes.jpg	em	fear	no	yes	0	575	-1	7	z	m
2	18	female	Finished stimuli\cc_fear_up.jpg	cc	fear	yes	yes	1	299	-1	7	z	z
2	18	female	Finished stimuli\rfear_upeys.jpg	rf	fear	yes	yes	1	393	-1	6	z	z
2	18	female	Finished stimuli\mf_fear_up_noeye.jpg	mf	fear	yes	no	1	747	-1	6	m	m
2	18	female	Finished stimuli\pefear_upeyes.jpg	pe	fear	yes	yes	1	352	-1	7	z	z
2	18	female	Finished stimuli\sw_fear_jumbled_eyes.jpg	sw	fear	no	yes	1	548	-1	7	z	z
2	18	female	Finished stimuli\em_fear_upeyes.jpg	em	fear	yes	yes	1	369	-1	6	z	z
2	18	female	Finished stimuli\cc_happy_upnoeyes.jpg	cc	happy	yes	no	0	437	-1	7	m	z
2	18	female	Finished stimuli\rhap_jumbledeyes.jpg	rh	happy	no	yes	1	501	-1	6	z	z
2	18	female	Finished stimuli\wf_fea_jumbled_noeyes.jpg	wf	fear	no	no	0	340	-1	7	m	z
2	18	female	Finished stimuli\mo_hap_jumbledeyes.jpg	mo	happy	no	yes	1	377	-1	7	z	z
2	18	female	Finished stimuli\pehappy_jumbled_no_eyes.jpg	pe	happy	no	no	1	356	-1	6	m	m
2	18	female	Finished stimuli\em_hap_noeyes.jpg	em	happy	yes	no	1	457	-1	7	m	m
2	18	female	Finished stimuli\sw_fear_noeyes.jpg	sw	fear	yes	no	0	409	-1	6	m	z
2	18	female	Finished stimuli\em_fear_jumblednoeyes.jpg	em	fear	no	no	1	339	-1	6	m	m
2	18	female	Finished stimuli\sw_fear_jumbled_noeyes.jpg	sw	fear	no	no	1	448	-1	6	m	m
2	18	female	Finished stimuli\pf_hap_upeye.jpg	pf	happy	yes	yes	1	617	-1	7	z	z
2	18	female	Finished stimuli\JJhappyjumblednoeyes.jpg	JJ	happy	no	no	1	427	-1	7	m	m
2	18	female	Finished stimuli\cc_happy_jumbledeyes.jpg	cc	happy	no	yes	0	676	-1	6	z	m
2	18	female	Finished stimuli\rhap_noeyes.jpg	rh	happy	yes	no	0	699	-1	7	m	z
2	18	female	Finished stimuli\pefear_up_jumbledeyes.jpg	pe	fear	no	yes	1	498	-1	6	z	z
2	18	female	Finished stimuli\sw_hap_jumbledeyes.jpg	sw	happy	no	yes	1	425	-1	7	z	z
2	18	female	Finished stimuli\mf_fear_upeye.jpg	mf	fear	yes	yes	1	602	-1	7	z	z
2	18	female	Finished stimuli\wf_hap_upeyes.jpg	wf	happy	yes	yes	1	468	-1	7	z	z
2	18	female	Finished stimuli\cc_fearjumbledno_eye.jpg	cc	fear	no	no	1	348	-1	7	m	m
2	18	female	Finished stimuli\wf_fea_up_noeyes.jpg	wf	fear	yes	no	1	880	-1	6	m	m
2	18	female	Finished stimuli\mo_hap_up_noeyes.jpg	mo	happy	yes	no	1	407	-1	7	m	m
2	18	female	Finished stimuli\cc_happy_upeyes.jpg	cc	happy	yes	yes	1	338	-1	7	z	z
2	18	female	Finished stimuli\pefear_up_jumbled_noeyes.jpg	pe	fear	no	no	1	287	-1	6	m	m
2	18	female	Finished stimuli\mf_happy_upeyes.jpg	mf	happy	yes	yes	1	406	-1	7	z	z
2	18	female	Finished stimuli\mo_hap_upeyes.jpg	mo	happy	yes	yes	1	376	-1	6	z	z
2	18	female	Finished stimuli\mo_fear_upnoeyes.jpg	mo	fear	yes	no	1	347	-1	7	m	m
2	18	female	Finished stimuli\rhap.jpg	rh	happy	yes	yes	1	408	-1	7	z	z
2	18	female	Finished stimuli\rfear_jumbledeyess.jpg	rf	fear	no	yes	1	426	-1	7	z	z
2	18	female	Finished stimuli\wf_hap_up_noeyes.jpg	wf	happy	yes	no	0	467	-1	6	m	z
2	18	female	Finished stimuli\pf_fear_jumbledeyes.jpg	pf	fear	no	yes	1	355	-1	6	z	z
2	18	female	Finished stimuli\rfear_up_noeys.jpg	rf	fear	yes	no	1	791	-1	7	m	m
2	18	female	Finished stimuli\cc_fear_jumbledeyes.jpg	cc	fear	no	yes	0	290	-1	6	z	m
2	18	female	Finished stimuli\pf_hap_up_noeye.jpg	pf	happy	yes	no	0	297	-1	7	m	z
2	18	female	Finished stimuli\jjfear_upnoeyes.jpg	jj	fear	yes	no	1	832	-1	7	m	m
2	18	female	Finished stimuli\mf_fear_jumblednoeye.jpg	mf	fear	no	no	0	377	-1	7	m	z
2	18	female	Finished stimuli\mo_fear_jumblednoeyes.jpg	mo	fear	no	no	0	404	-1	7	m	z
2	18	female	Finished stimuli\mo_hap_jumblednoeyes.jpg	mo	happy	no	no	0	558	-1	7	m	z
2	18	female	Finished stimuli\jjhap_jumbledeyes.jpg	jj	happy	no	yes	1	457	-1	7	z	z
2	18	female	Finished stimuli\em_hap_upeyes.jpg	em	happy	yes	yes	1	322	-1	7	z	z
2	18	female	Finished stimuli\cc_fear_noeyes.jpg	cc	fear	yes	no	0	496	-1	7	m	z
2	18	female	Finished stimuli\wf_hap_jumbled_noeyes.jpg	wf	happy	no	no	1	670	-1	7	m	m
2	18	female	Finished stimuli\pf_fear_up_noeyes.jpg	pf	fear	yes	no	1	478	-1	7	m	m
2	18	female	Finished stimuli\mf_fear_jumbledeye.jpg	mf	fear	no	yes	1	533	-1	7	z	z
2	18	female	Finished stimuli\pf_hap_jumbled_noeye.jpg	pf	happy	no	no	1	506	-1	6	m	m
2	18	female	Finished stimuli\em_hap_jumbledeyes.jpg	em	happy	no	yes	1	529	-1	7	z	z
2	18	female	Finished stimuli\mo_fear_jumbledeyes.jpg	mo	fear	no	yes	1	358	-1	6	z	z
4	19	female	Finished stimuli\rhap_jumbled_noeyes.jpg	rh	happy	no	no	1	491	-1	23	m	m
4	19	female	Finished stimuli\mo_hap_upeyes.jpg	mo	happy	yes	yes	1	520	-1	23	z	z
4	19	female	Finished stimuli\mf_happy_upeyes.jpg	mf	happy	yes	yes	1	214	-1	7	z	z
4	19	female	Finished stimuli\cc_happy_upnoeyes.jpg	cc	happy	yes	no	1	231	-1	7	m	m
4	19	female	Finished stimuli\sw_hap_jumbledeyes.jpg	sw	happy	no	yes	1	320	-1	7	z	z
4	19	female	Finished stimuli\pefear_up_noeyes.jpg	pe	fear	yes	no	1	221	-1	6	m	m
4	19	female	Finished stimuli\wf_hap_jumbled_noeyes.jpg	wf	happy	no	no	1	215	-1	7	m	m
4	19	female	Finished stimuli\wf_fea_up_noeyes.jpg	wf	fear	yes	no	1	257	-1	7	m	m
4	19	female	Finished stimuli\wf_hap_jumbledeyes.jpg	wf	happy	no	yes	0	249	-1	6	z	m
4	19	female	Finished stimuli\mf_happy_jumbledeyes.jpg	mf	happy	no	yes	1	153	-1	6	z	z
4	19	female	Finished stimuli\rfear_jumbled_noeyess.jpg	rf	fear	no	no	1	277	-1	7	m	m
4	19	female	Finished stimuli\wf_hap_up_noeyes.jpg	wf	happy	yes	no	0	149	-1	7	m	z
4	19	female	Finished stimuli\sw_hap_upeyes.jpg	sw	happy	yes	yes	1	345	-1	6	z	z
4	19	female	Finished stimuli\pf_fear_jumbledeyes.jpg	pf	fear	no	yes	1	262	-1	7	z	z
4	19	female	Finished stimuli\JJhappyupeyes.jpg	JJ	happy	yes	yes	1	205	-1	7	z	z
4	19	female	Finished stimuli\jjhap_jumbledeyes.jpg	jj	happy	no	yes	1	240	-1	7	z	z
4	19	female	Finished stimuli\sw_fear_jumbled_noeyes.jpg	sw	fear	no	no	1	257	-1	6	m	m
4	19	female	Finished stimuli\mo_fear_upeyes.jpg	mo	fear	yes	yes	1	258	-1	7	z	z
4	19	female	Finished stimuli\cc_happy_jumblednoeyes.jpg	cc	happy	no	no	1	290	-1	6	m	m
4	19	female	Finished stimuli\cc_fear_up.jpg	cc	fear	yes	yes	1	201	-1	6	z	z
4	19	female	Finished stimuli\rfear_up_noeys.jpg	rf	fear	yes	no	0	356	-1	7	m	z
4	19	female	Finished stimuli\mf_happy_jumbled_noeyes.jpg	mf	happy	no	no	0	111	-1	7	m	z
4	19	female	Finished stimuli\JJhappyupnoeyes.jpg	JJ	happy	yes	no	1	363	-1	6	m	m
4	19	female	Finished stimuli\pf_fear_up_noeyes.jpg	pf	fear	yes	no	1	279	-1	7	m	m
4	19	female	Finished stimuli\jjfear_jumblednoeyes.jpg	jj	fear	no	no	1	262	-1	6	m	m
4	19	female	Finished stimuli\jjfear_jumbledeyes.jpg	jj	fear	no	yes	1	206	-1	7	z	z
4	19	female	Finished stimuli\mo_hap_up_noeyes.jpg	mo	happy	yes	no	0	200	-1	7	m	z
4	19	female	Finished stimuli\mo_fear_jumblednoeyes.jpg	mo	fear	no	no	0	203	-1	7	m	z
4	19	female	Finished stimuli\em_fear_noeyes.jpg	em	fear	yes	no	0	149	-1	6	m	z
4	19	female	Finished stimuli\rfear_upeys.jpg	rf	fear	yes	yes	1	162	-1	7	z	z
4	19	female	Finished stimuli\jjfear_upeyes.jpg	jj	fear	yes	yes	1	125	-1	7	z	z
4	19	female	Finished stimuli\mf_fear_jumbledeye.jpg	mf	fear	no	yes	1	242	-1	6	z	z
4	19	female	Finished stimuli\pehappy_upeyes.jpg	pe	happy	yes	yes	1	178	-1	7	z	z
4	19	female	Finished stimuli\sw_hap_noeyes.jpg	sw	happy	yes	no	0	166	-1	7	m	z
4	19	female	Finished stimuli\pf_fear_jumbled_noeyes.jpg	pf	fear	no	no	0	169	-1	7	m	z
4	19	female	Finished stimuli\cc_fear_noeyes.jpg	cc	fear	yes	no	0	173	-1	6	m	z
4	19	female	Finished stimuli\mo_fear_jumbledeyes.jpg	mo	fear	no	yes	1	305	-1	6	z	z
4	19	female	Finished stimuli\wf_fea_jumbled_noeyes.jpg	wf	fear	no	no	1	351	-1	7	m	m
4	19	female	Finished stimuli\em_hap_jumbledeyes.jpg	em	happy	no	yes	1	660	-1	6	z	z
4	19	female	Finished stimuli\pf_hap_upeye.jpg	pf	happy	yes	yes	1	124	-1	6	z	z
4	19	female	Finished stimuli\em_hap_noeyes.jpg	em	happy	yes	no	0	226	-1	7	m	z
4	19	female	Finished stimuli\pf_hap_up_noeye.jpg	pf	happy	yes	no	1	283	-1	7	m	m
4	19	female	Finished stimuli\pefear_up_jumbledeyes.jpg	pe	fear	no	yes	1	161	-1	6	z	z
4	19	female	Finished stimuli\rhap_noeyes.jpg	rh	happy	yes	no	0	197	-1	7	m	z
4	19	female	Finished stimuli\pf_hap_jumbled_noeye.jpg	pf	happy	no	no	1	263	-1	7	m	m
4	19	female	Finished stimuli\rfear_jumbledeyess.jpg	rf	fear	no	yes	1	303	-1	6	z	z
4	19	female	Finished stimuli\sw_fear_jumbled_eyes.jpg	sw	fear	no	yes	1	198	-1	7	z	z
4	19	female	Finished stimuli\mo_hap_jumbledeyes.jpg	mo	happy	no	yes	1	152	-1	6	z	z
4	19	female	Finished stimuli\cc_fear_jumbledeyes.jpg	cc	fear	no	yes	1	181	-1	7	z	z
4	19	female	Finished stimuli\pefear_up_jumbled_noeyes.jpg	pe	fear	no	no	0	184	-1	7	m	z
4	19	female	Finished stimuli\pehappy_jumbled_no_eyes.jpg	pe	happy	no	no	1	371	-1	7	m	m
4	19	female	Finished stimuli\mf_fear_upeye.jpg	mf	fear	yes	yes	1	158	-1	6	z	z
4	19	female	Finished stimuli\mo_fear_upnoeyes.jpg	mo	fear	yes	no	0	122	-1	7	m	z
4	19	female	Finished stimuli\pefear_upeyes.jpg	pe	fear	yes	yes	1	152	-1	7	z	z
4	19	female	Finished stimuli\em_fear_jumblednoeyes.jpg	em	fear	no	no	1	308	-1	6	m	m
4	19	female	Finished stimuli\rhap.jpg	rh	happy	yes	yes	1	146	-1	7	z	z
4	19	female	Finished stimuli\mf_fear_jumblednoeye.jpg	mf	fear	no	no	1	326	-1	7	m	m
4	19	female	Finished stimuli\em_fear_jumbledeyes.jpg	em	fear	no	yes	1	147	-1	7	z	z
4	19	female	Finished stimuli\pf_fear_upeyes.jpg	pf	fear	yes	yes	1	143	-1	7	z	z
4	19	female	Finished stimuli\sw_fear_upeyes.jpg	sw	fear	yes	yes	1	156	-1	7	z	z
4	19	female	Finished stimuli\rhap_jumbledeyes.jpg	rh	happy	no	yes	1	272	-1	6	z	z
4	19	female	Finished stimuli\wf_fea_jumbled_eyes.jpg	wf	fear	no	yes	1	232	-1	6	z	z
4	19	female	Finished stimuli\mf_happy_upno_eyes.jpg	mf	happy	yes	no	1	265	-1	7	m	m
4	19	female	Finished stimuli\sw_fear_noeyes.jpg	sw	fear	yes	no	0	184	-1	7	m	z
4	19	female	Finished stimuli\cc_happy_jumbledeyes.jpg	cc	happy	no	yes	1	154	-1	7	z	z
4	19	female	Finished stimuli\cc_happy_upeyes.jpg	cc	happy	yes	yes	1	127	-1	6	z	z
4	19	female	Finished stimuli\em_fear_upeyes.jpg	em	fear	yes	yes	1	116	-1	6	z	z
4	19	female	Finished stimuli\cc_fearjumbledno_eye.jpg	cc	fear	no	no	1	258	-1	7	m	m
4	19	female	Finished stimuli\wf_fea_up eyes.jpg	wf	fear	yes	yes	1	162	-1	7	z	z
4	19	female	Finished stimuli\pf_hap_jumbledeye.jpg	pf	happy	no	yes	1	189	-1	7	z	z
4	19	female	Finished stimuli\JJhappyjumblednoeyes.jpg	JJ	happy	no	no	0	257	-1	7	m	z
4	19	female	Finished stimuli\mf_fear_up_noeye.jpg	mf	fear	yes	no	1	256	-1	7	m	m
4	19	female	Finished stimuli\jjfear_upnoeyes.jpg	jj	fear	yes	no	0	233	-1	7	m	z
4	19	female	Finished stimuli\pehappy_noeyes.jpg	pe	happy	yes	no	0	322	-1	6	m	z
4	19	female	Finished stimuli\em_hap_upeyes.jpg	em	happy	yes	yes	1	336	-1	7	z	z
4	19	female	Finished stimuli\em_hap_jumblednoeyes.jpg	em	happy	no	no	1	197	-1	6	m	m
4	19	female	Finished stimuli\wf_hap_upeyes.jpg	wf	happy	yes	yes	1	344	-1	7	z	z
4	19	female	Finished stimuli\sw_hap_jumbled_noeyes.jpg	sw	happy	no	no	1	155	-1	7	m	m
4	19	female	Finished stimuli\mo_hap_jumblednoeyes.jpg	mo	happy	no	no	1	127	-1	6	m	m
4	19	female	Finished stimuli\pehappy_jumbled_eyes.jpg	pe	happy	no	yes	1	260	-1	7	z	z
4	19	female	Finished stimuli\pefear_upeyes.jpg	pe	fear	yes	yes	1	159	-1	6	z	z
4	19	female	Finished stimuli\wf_fea_jumbled_noeyes.jpg	wf	fear	no	no	1	251	-1	7	m	m
4	19	female	Finished stimuli\pf_hap_upeye.jpg	pf	happy	yes	yes	1	147	-1	7	z	z
4	19	female	Finished stimuli\wf_fea_jumbled_eyes.jpg	wf	fear	no	yes	1	304	-1	7	z	z
4	19	female	Finished stimuli\rhap_jumbledeyes.jpg	rh	happy	no	yes	1	198	-1	7	z	z
4	19	female	Finished stimuli\wf_hap_jumbledeyes.jpg	wf	happy	no	yes	1	201	-1	7	z	z
4	19	female	Finished stimuli\mo_fear_upnoeyes.jpg	mo	fear	yes	no	0	131	-1	6	m	z
4	19	female	Finished stimuli\cc_happy_jumbledeyes.jpg	cc	happy	no	yes	1	240	-1	7	z	z
4	19	female	Finished stimuli\mo_hap_upeyes.jpg	mo	happy	yes	yes	1	233	-1	7	z	z
4	19	female	Finished stimuli\mf_fear_up_noeye.jpg	mf	fear	yes	no	1	346	-1	6	m	m
4	19	female	Finished stimuli\mf_fear_jumblednoeye.jpg	mf	fear	no	no	0	150	-1	7	m	z
4	19	female	Finished stimuli\mf_happy_upno_eyes.jpg	mf	happy	yes	no	1	258	-1	7	m	m
4	19	female	Finished stimuli\jjhap_jumbledeyes.jpg	jj	happy	no	yes	1	210	-1	6	z	z
4	19	female	Finished stimuli\mf_happy_jumbledeyes.jpg	mf	happy	no	yes	1	219	-1	7	z	z
4	19	female	Finished stimuli\sw_hap_noeyes.jpg	sw	happy	yes	no	0	77	-1	6	m	z
4	19	female	Finished stimuli\sw_fear_jumbled_noeyes.jpg	sw	fear	no	no	0	284	-1	6	m	z
4	19	female	Finished stimuli\mo_fear_jumbledeyes.jpg	mo	fear	no	yes	1	299	-1	7	z	z
4	19	female	Finished stimuli\cc_fear_up.jpg	cc	fear	yes	yes	1	226	-1	7	z	z
4	19	female	Finished stimuli\cc_fearjumbledno_eye.jpg	cc	fear	no	no	1	299	-1	6	m	m
4	19	female	Finished stimuli\mf_fear_upeye.jpg	mf	fear	yes	yes	1	249	-1	7	z	z
4	19	female	Finished stimuli\sw_fear_upeyes.jpg	sw	fear	yes	yes	1	201	-1	7	z	z
4	19	female	Finished stimuli\rfear_jumbled_noeyess.jpg	rf	fear	no	no	1	252	-1	7	m	m
4	19	female	Finished stimuli\sw_fear_jumbled_eyes.jpg	sw	fear	no	yes	1	259	-1	7	z	z
4	19	female	Finished stimuli\wf_fea_up eyes.jpg	wf	fear	yes	yes	1	195	-1	6	z	z
4	19	female	Finished stimuli\cc_happy_upnoeyes.jpg	cc	happy	yes	no	1	254	-1	7	m	m
4	19	female	Finished stimuli\wf_hap_upeyes.jpg	wf	happy	yes	yes	1	190	-1	6	z	z
4	19	female	Finished stimuli\pf_hap_up_noeye.jpg	pf	happy	yes	no	1	321	-1	6	m	m
4	19	female	Finished stimuli\cc_happy_upeyes.jpg	cc	happy	yes	yes	1	183	-1	6	z	z
4	19	female	Finished stimuli\pehappy_jumbled_eyes.jpg	pe	happy	no	yes	1	170	-1	6	z	z
4	19	female	Finished stimuli\mo_hap_up_noeyes.jpg	mo	happy	yes	no	0	342	-1	6	m	z
4	19	female	Finished stimuli\cc_fear_noeyes.jpg	cc	fear	yes	no	1	235	-1	7	m	m
4	19	female	Finished stimuli\pehappy_noeyes.jpg	pe	happy	yes	no	1	260	-1	7	m	m
4	19	female	Finished stimuli\mf_fear_jumbledeye.jpg	mf	fear	no	yes	1	171	-1	7	z	z
4	19	female	Finished stimuli\em_fear_upeyes.jpg	em	fear	yes	yes	1	143	-1	7	z	z
4	19	female	Finished stimuli\wf_hap_jumbled_noeyes.jpg	wf	happy	no	no	1	227	-1	6	m	m
4	19	female	Finished stimuli\mf_happy_upeyes.jpg	mf	happy	yes	yes	1	212	-1	7	z	z
4	19	female	Finished stimuli\rhap.jpg	rh	happy	yes	yes	1	125	-1	7	z	z
4	19	female	Finished stimuli\em_fear_jumbledeyes.jpg	em	fear	no	yes	1	178	-1	7	z	z
4	19	female	Finished stimuli\pehappy_upeyes.jpg	pe	happy	yes	yes	1	206	-1	7	z	z
4	19	female	Finished stimuli\JJhappyupnoeyes.jpg	JJ	happy	yes	no	1	295	-1	7	m	m
4	19	female	Finished stimuli\sw_hap_upeyes.jpg	sw	happy	yes	yes	1	293	-1	7	z	z
4	19	female	Finished stimuli\mo_hap_jumblednoeyes.jpg	mo	happy	no	no	1	260	-1	7	m	m
4	19	female	Finished stimuli\em_hap_noeyes.jpg	em	happy	yes	no	1	172	-1	7	m	m
4	19	female	Finished stimuli\jjfear_jumblednoeyes.jpg	jj	fear	no	no	1	310	-1	7	m	m
4	19	female	Finished stimuli\rhap_noeyes.jpg	rh	happy	yes	no	1	284	-1	7	m	m
4	19	female	Finished stimuli\pf_hap_jumbledeye.jpg	pf	happy	no	yes	1	195	-1	7	z	z
4	19	female	Finished stimuli\rfear_jumbledeyess.jpg	rf	fear	no	yes	1	142	-1	6	z	z
4	19	female	Finished stimuli\pf_fear_up_noeyes.jpg	pf	fear	yes	no	1	266	-1	7	m	m
4	19	female	Finished stimuli\cc_fear_jumbledeyes.jpg	cc	fear	no	yes	1	274	-1	6	z	z
4	19	female	Finished stimuli\mf_happy_jumbled_noeyes.jpg	mf	happy	no	no	1	265	-1	7	m	m
4	19	female	Finished stimuli\em_hap_upeyes.jpg	em	happy	yes	yes	1	385	-1	6	z	z
4	19	female	Finished stimuli\rfear_upeys.jpg	rf	fear	yes	yes	1	236	-1	7	z	z
4	19	female	Finished stimuli\pf_hap_jumbled_noeye.jpg	pf	happy	no	no	1	222	-1	7	m	m
4	19	female	Finished stimuli\pehappy_jumbled_no_eyes.jpg	pe	happy	no	no	1	135	-1	7	m	m
4	19	female	Finished stimuli\sw_hap_jumbled_noeyes.jpg	sw	happy	no	no	1	171	-1	6	m	m
4	19	female	Finished stimuli\JJhappyupeyes.jpg	JJ	happy	yes	yes	1	295	-1	6	z	z
4	19	female	Finished stimuli\em_fear_noeyes.jpg	em	fear	yes	no	1	133	-1	7	m	m
4	19	female	Finished stimuli\wf_hap_up_noeyes.jpg	wf	happy	yes	no	1	123	-1	7	m	m
4	19	female	Finished stimuli\em_hap_jumbledeyes.jpg	em	happy	no	yes	0	152	-1	7	z	m
4	19	female	Finished stimuli\pefear_up_noeyes.jpg	pe	fear	yes	no	1	179	-1	7	m	m
4	19	female	Finished stimuli\sw_fear_noeyes.jpg	sw	fear	yes	no	1	375	-1	7	m	m
4	19	female	Finished stimuli\mo_fear_upeyes.jpg	mo	fear	yes	yes	1	194	-1	7	z	z
4	19	female	Finished stimuli\jjfear_upnoeyes.jpg	jj	fear	yes	no	0	165	-1	6	m	z
4	19	female	Finished stimuli\em_hap_jumblednoeyes.jpg	em	happy	no	no	1	185	-1	7	m	m
4	19	female	Finished stimuli\wf_fea_up_noeyes.jpg	wf	fear	yes	no	1	188	-1	7	m	m
4	19	female	Finished stimuli\JJhappyjumblednoeyes.jpg	JJ	happy	no	no	1	174	-1	6	m	m
4	19	female	Finished stimuli\sw_hap_jumbledeyes.jpg	sw	happy	no	yes	0	362	-1	7	z	m
4	19	female	Finished stimuli\cc_happy_jumblednoeyes.jpg	cc	happy	no	no	1	358	-1	7	m	m
4	19	female	Finished stimuli\mo_hap_jumbledeyes.jpg	mo	happy	no	yes	1	154	-1	6	z	z
4	19	female	Finished stimuli\pefear_up_jumbled_noeyes.jpg	pe	fear	no	no	0	271	-1	7	m	z
4	19	female	Finished stimuli\pf_fear_jumbledeyes.jpg	pf	fear	no	yes	1	206	-1	7	z	z
4	19	female	Finished stimuli\pefear_up_jumbledeyes.jpg	pe	fear	no	yes	1	129	-1	6	z	z
4	19	female	Finished stimuli\pf_fear_upeyes.jpg	pf	fear	yes	yes	1	302	-1	6	z	z
4	19	female	Finished stimuli\rfear_up_noeys.jpg	rf	fear	yes	no	1	317	-1	7	m	m
4	19	female	Finished stimuli\rhap_jumbled_noeyes.jpg	rh	happy	no	no	1	202	-1	7	m	m
4	19	female	Finished stimuli\jjfear_upeyes.jpg	jj	fear	yes	yes	1	213	-1	7	z	z
4	19	female	Finished stimuli\pf_fear_jumbled_noeyes.jpg	pf	fear	no	no	0	183	-1	7	m	z
4	19	female	Finished stimuli\mo_fear_jumblednoeyes.jpg	mo	fear	no	no	1	298	-1	7	m	m
4	19	female	Finished stimuli\em_fear_jumblednoeyes.jpg	em	fear	no	no	1	256	-1	7	m	m
4	19	female	Finished stimuli\jjfear_jumbledeyes.jpg	jj	fear	no	yes	1	249	-1	7	z	z
4	19	female	Finished stimuli\em_hap_jumblednoeyes.jpg	em	happy	no	no	1	256	-1	6	m	m
4	19	female	Finished stimuli\mf_fear_up_noeye.jpg	mf	fear	yes	no	1	135	-1	7	m	m
4	19	female	Finished stimuli\pf_fear_jumbled_noeyes.jpg	pf	fear	no	no	1	124	-1	7	m	m
4	19	female	Finished stimuli\pehappy_upeyes.jpg	pe	happy	yes	yes	0	354	-1	7	z	m
4	19	female	Finished stimuli\em_fear_upeyes.jpg	em	fear	yes	yes	1	270	-1	6	z	z
4	19	female	Finished stimuli\pefear_up_noeyes.jpg	pe	fear	yes	no	1	245	-1	7	m	m
4	19	female	Finished stimuli\jjfear_jumbledeyes.jpg	jj	fear	no	yes	1	237	-1	6	z	z
4	19	female	Finished stimuli\sw_hap_upeyes.jpg	sw	happy	yes	yes	1	174	-1	7	z	z
4	19	female	Finished stimuli\sw_hap_jumbled_noeyes.jpg	sw	happy	no	no	1	257	-1	7	m	m
4	19	female	Finished stimuli\mf_happy_upeyes.jpg	mf	happy	yes	yes	1	185	-1	7	z	z
4	19	female	Finished stimuli\pefear_up_jumbled_noeyes.jpg	pe	fear	no	no	1	316	-1	7	m	m
4	19	female	Finished stimuli\pf_fear_up_noeyes.jpg	pf	fear	yes	no	1	194	-1	7	m	m
4	19	female	Finished stimuli\cc_fear_up.jpg	cc	fear	yes	yes	1	212	-1	6	z	z
4	19	female	Finished stimuli\sw_fear_noeyes.jpg	sw	fear	yes	no	1	334	-1	7	m	m
4	19	female	Finished stimuli\wf_hap_up_noeyes.jpg	wf	happy	yes	no	1	187	-1	6	m	m
4	19	female	Finished stimuli\wf_fea_up eyes.jpg	wf	fear	yes	yes	1	254	-1	6	z	z
4	19	female	Finished stimuli\mo_hap_upeyes.jpg	mo	happy	yes	yes	1	191	-1	7	z	z
4	19	female	Finished stimuli\cc_happy_upnoeyes.jpg	cc	happy	yes	no	1	258	-1	7	m	m
4	19	female	Finished stimuli\cc_happy_upeyes.jpg	cc	happy	yes	yes	0	338	-1	7	z	m
4	19	female	Finished stimuli\mo_fear_upnoeyes.jpg	mo	fear	yes	no	0	151	-1	7	m	z
4	19	female	Finished stimuli\mo_fear_jumblednoeyes.jpg	mo	fear	no	no	1	268	-1	6	m	m
4	19	female	Finished stimuli\em_fear_jumbledeyes.jpg	em	fear	no	yes	1	172	-1	7	z	z
4	19	female	Finished stimuli\pehappy_jumbled_no_eyes.jpg	pe	happy	no	no	0	56	-1	7	m	z
4	19	female	Finished stimuli\rfear_up_noeys.jpg	rf	fear	yes	no	1	183	-1	6	m	m
4	19	female	Finished stimuli\mo_hap_jumblednoeyes.jpg	mo	happy	no	no	1	130	-1	6	m	m
4	19	female	Finished stimuli\jjhap_jumbledeyes.jpg	jj	happy	no	yes	1	263	-1	6	z	z
4	19	female	Finished stimuli\mf_fear_jumbledeye.jpg	mf	fear	no	yes	1	198	-1	7	z	z
4	19	female	Finished stimuli\sw_hap_jumbledeyes.jpg	sw	happy	no	yes	1	369	-1	7	z	z
4	19	female	Finished stimuli\wf_hap_jumbledeyes.jpg	wf	happy	no	yes	0	253	-1	7	z	m
4	19	female	Finished stimuli\rhap_jumbledeyes.jpg	rh	happy	no	yes	1	261	-1	6	z	z
4	19	female	Finished stimuli\cc_fearjumbledno_eye.jpg	cc	fear	no	no	1	277	-1	6	m	m
4	19	female	Finished stimuli\em_hap_noeyes.jpg	em	happy	yes	no	0	84	-1	6	m	z
4	19	female	Finished stimuli\em_hap_upeyes.jpg	em	happy	yes	yes	1	83	-1	7	z	z
4	19	female	Finished stimuli\pf_hap_jumbled_noeye.jpg	pf	happy	no	no	1	274	-1	7	m	m
4	19	female	Finished stimuli\pefear_up_jumbledeyes.jpg	pe	fear	no	yes	1	162	-1	6	z	z
4	19	female	Finished stimuli\mf_happy_upno_eyes.jpg	mf	happy	yes	no	1	158	-1	6	m	m
4	19	female	Finished stimuli\JJhappyjumblednoeyes.jpg	JJ	happy	no	no	0	98	-1	7	m	z
4	19	female	Finished stimuli\wf_hap_upeyes.jpg	wf	happy	yes	yes	0	273	-1	7	z	m
4	19	female	Finished stimuli\wf_fea_jumbled_eyes.jpg	wf	fear	no	yes	1	217	-1	7	z	z
4	19	female	Finished stimuli\jjfear_upnoeyes.jpg	jj	fear	yes	no	1	323	-1	7	m	m
4	19	female	Finished stimuli\cc_happy_jumblednoeyes.jpg	cc	happy	no	no	0	168	-1	7	m	z
4	19	female	Finished stimuli\cc_fear_noeyes.jpg	cc	fear	yes	no	0	196	-1	6	m	z
4	19	female	Finished stimuli\em_fear_noeyes.jpg	em	fear	yes	no	1	159	-1	7	m	m
4	19	female	Finished stimuli\pehappy_noeyes.jpg	pe	happy	yes	no	1	234	-1	7	m	m
4	19	female	Finished stimuli\mf_fear_upeye.jpg	mf	fear	yes	yes	1	171	-1	6	z	z
4	19	female	Finished stimuli\rfear_upeys.jpg	rf	fear	yes	yes	1	174	-1	7	z	z
4	19	female	Finished stimuli\pf_hap_upeye.jpg	pf	happy	yes	yes	1	193	-1	7	z	z
4	19	female	Finished stimuli\jjfear_upeyes.jpg	jj	fear	yes	yes	1	116	-1	6	z	z
4	19	female	Finished stimuli\pf_hap_up_noeye.jpg	pf	happy	yes	no	1	362	-1	7	m	m
4	19	female	Finished stimuli\em_hap_jumbledeyes.jpg	em	happy	no	yes	1	342	-1	7	z	z
4	19	female	Finished stimuli\mo_hap_up_noeyes.jpg	mo	happy	yes	no	1	218	-1	6	m	m
4	19	female	Finished stimuli\wf_hap_jumbled_noeyes.jpg	wf	happy	no	no	1	148	-1	6	m	m
4	19	female	Finished stimuli\cc_fear_jumbledeyes.jpg	cc	fear	no	yes	1	168	-1	7	z	z
4	19	female	Finished stimuli\cc_happy_jumbledeyes.jpg	cc	happy	no	yes	1	204	-1	6	z	z
4	19	female	Finished stimuli\pehappy_jumbled_eyes.jpg	pe	happy	no	yes	1	255	-1	7	z	z
4	19	female	Finished stimuli\mo_hap_jumbledeyes.jpg	mo	happy	no	yes	1	239	-1	6	z	z
4	19	female	Finished stimuli\mo_fear_upeyes.jpg	mo	fear	yes	yes	0	312	-1	7	z	m
4	19	female	Finished stimuli\wf_fea_jumbled_noeyes.jpg	wf	fear	no	no	1	278	-1	7	m	m
4	19	female	Finished stimuli\jjfear_jumblednoeyes.jpg	jj	fear	no	no	1	261	-1	7	m	m
4	19	female	Finished stimuli\pf_fear_jumbledeyes.jpg	pf	fear	no	yes	1	213	-1	7	z	z
4	19	female	Finished stimuli\mo_fear_jumbledeyes.jpg	mo	fear	no	yes	1	175	-1	6	z	z
4	19	female	Finished stimuli\sw_fear_jumbled_eyes.jpg	sw	fear	no	yes	1	226	-1	6	z	z
4	19	female	Finished stimuli\rhap.jpg	rh	happy	yes	yes	1	195	-1	7	z	z
4	19	female	Finished stimuli\sw_fear_upeyes.jpg	sw	fear	yes	yes	0	299	-1	7	z	m
4	19	female	Finished stimuli\em_fear_jumblednoeyes.jpg	em	fear	no	no	1	313	-1	6	m	m
4	19	female	Finished stimuli\rfear_jumbledeyess.jpg	rf	fear	no	yes	1	246	-1	6	z	z
4	19	female	Finished stimuli\sw_hap_noeyes.jpg	sw	happy	yes	no	1	423	-1	7	m	m
4	19	female	Finished stimuli\wf_fea_up_noeyes.jpg	wf	fear	yes	no	1	296	-1	7	m	m
4	19	female	Finished stimuli\pf_fear_upeyes.jpg	pf	fear	yes	yes	1	223	-1	6	z	z
4	19	female	Finished stimuli\rfear_jumbled_noeyess.jpg	rf	fear	no	no	1	257	-1	7	m	m
4	19	female	Finished stimuli\mf_happy_jumbledeyes.jpg	mf	happy	no	yes	1	297	-1	7	z	z
4	19	female	Finished stimuli\mf_fear_jumblednoeye.jpg	mf	fear	no	no	1	254	-1	7	m	m
4	19	female	Finished stimuli\mf_happy_jumbled_noeyes.jpg	mf	happy	no	no	0	174	-1	7	m	z
4	19	female	Finished stimuli\pf_hap_jumbledeye.jpg	pf	happy	no	yes	1	314	-1	6	z	z
4	19	female	Finished stimuli\rhap_noeyes.jpg	rh	happy	yes	no	1	168	-1	6	m	m
4	19	female	Finished stimuli\sw_fear_jumbled_noeyes.jpg	sw	fear	no	no	1	196	-1	7	m	m
4	19	female	Finished stimuli\pefear_upeyes.jpg	pe	fear	yes	yes	1	190	-1	6	z	z
4	19	female	Finished stimuli\JJhappyupnoeyes.jpg	JJ	happy	yes	no	1	176	-1	6	m	m
4	19	female	Finished stimuli\rhap_jumbled_noeyes.jpg	rh	happy	no	no	1	155	-1	6	m	m
4	19	female	Finished stimuli\JJhappyupeyes.jpg	JJ	happy	yes	yes	1	296	-1	7	z	z
4	19	female	Finished stimuli\mo_fear_jumbledeyes.jpg	mo	fear	no	yes	1	396	-1	7	z	z
4	19	female	Finished stimuli\pehappy_jumbled_no_eyes.jpg	pe	happy	no	no	1	110	-1	7	m	m
4	19	female	Finished stimuli\em_hap_jumblednoeyes.jpg	em	happy	no	no	1	116	-1	6	m	m
4	19	female	Finished stimuli\cc_fear_jumbledeyes.jpg	cc	fear	no	yes	1	281	-1	7	z	z
4	19	female	Finished stimuli\em_hap_jumbledeyes.jpg	em	happy	no	yes	0	224	-1	6	z	m
4	19	female	Finished stimuli\pf_fear_jumbled_noeyes.jpg	pf	fear	no	no	0	186	-1	7	m	z
4	19	female	Finished stimuli\sw_hap_jumbledeyes.jpg	sw	happy	no	yes	0	205	-1	6	z	m
4	19	female	Finished stimuli\pefear_up_jumbledeyes.jpg	pe	fear	no	yes	1	135	-1	7	z	z
4	19	female	Finished stimuli\em_fear_upeyes.jpg	em	fear	yes	yes	1	117	-1	7	z	z
4	19	female	Finished stimuli\jjfear_jumblednoeyes.jpg	jj	fear	no	no	0	98	-1	7	m	z
4	19	female	Finished stimuli\sw_fear_noeyes.jpg	sw	fear	yes	no	1	137	-1	7	m	m
4	19	female	Finished stimuli\JJhappyjumblednoeyes.jpg	JJ	happy	no	no	1	150	-1	7	m	m
4	19	female	Finished stimuli\pf_hap_jumbled_noeye.jpg	pf	happy	no	no	1	138	-1	7	m	m
4	19	female	Finished stimuli\wf_hap_jumbled_noeyes.jpg	wf	happy	no	no	1	175	-1	7	m	m
4	19	female	Finished stimuli\pf_fear_up_noeyes.jpg	pf	fear	yes	no	1	218	-1	7	m	m
4	19	female	Finished stimuli\mf_happy_jumbled_noeyes.jpg	mf	happy	no	no	0	436	-1	7	m	z
4	19	female	Finished stimuli\cc_happy_upnoeyes.jpg	cc	happy	yes	no	1	197	-1	6	m	m
4	19	female	Finished stimuli\cc_fear_up.jpg	cc	fear	yes	yes	0	359	-1	7	z	m
4	19	female	Finished stimuli\rhap_jumbledeyes.jpg	rh	happy	no	yes	1	171	-1	6	z	z
4	19	female	Finished stimuli\jjfear_jumbledeyes.jpg	jj	fear	no	yes	1	263	-1	6	z	z
4	19	female	Finished stimuli\pf_hap_up_noeye.jpg	pf	happy	yes	no	1	215	-1	7	m	m
4	19	female	Finished stimuli\sw_hap_jumbled_noeyes.jpg	sw	happy	no	no	1	231	-1	7	m	m
4	19	female	Finished stimuli\cc_happy_jumbledeyes.jpg	cc	happy	no	yes	0	272	-1	7	z	m
4	19	female	Finished stimuli\mf_happy_upno_eyes.jpg	mf	happy	yes	no	1	272	-1	7	m	m
4	19	female	Finished stimuli\wf_fea_jumbled_eyes.jpg	wf	fear	no	yes	1	478	-1	7	z	z
4	19	female	Finished stimuli\rfear_up_noeys.jpg	rf	fear	yes	no	1	174	-1	7	m	m
4	19	female	Finished stimuli\mf_fear_jumbledeye.jpg	mf	fear	no	yes	1	313	-1	7	z	z
4	19	female	Finished stimuli\mf_fear_upeye.jpg	mf	fear	yes	yes	1	206	-1	6	z	z
4	19	female	Finished stimuli\pehappy_jumbled_eyes.jpg	pe	happy	no	yes	0	281	-1	7	z	m
4	19	female	Finished stimuli\mo_fear_upnoeyes.jpg	mo	fear	yes	no	1	160	-1	7	m	m
4	19	female	Finished stimuli\rfear_jumbledeyess.jpg	rf	fear	no	yes	1	259	-1	7	z	z
4	19	female	Finished stimuli\JJhappyupeyes.jpg	JJ	happy	yes	yes	0	163	-1	7	z	m
4	19	female	Finished stimuli\rhap_noeyes.jpg	rh	happy	yes	no	1	287	-1	6	m	m
4	19	female	Finished stimuli\wf_hap_jumbledeyes.jpg	wf	happy	no	yes	0	230	-1	7	z	m
4	19	female	Finished stimuli\sw_hap_upeyes.jpg	sw	happy	yes	yes	1	255	-1	7	z	z
4	19	female	Finished stimuli\wf_hap_upeyes.jpg	wf	happy	yes	yes	1	152	-1	6	z	z
4	19	female	Finished stimuli\jjhap_jumbledeyes.jpg	jj	happy	no	yes	1	148	-1	7	z	z
4	19	female	Finished stimuli\sw_fear_upeyes.jpg	sw	fear	yes	yes	1	217	-1	7	z	z
4	19	female	Finished stimuli\jjfear_upeyes.jpg	jj	fear	yes	yes	1	187	-1	7	z	z
4	19	female	Finished stimuli\em_fear_jumblednoeyes.jpg	em	fear	no	no	1	174	-1	7	m	m
4	19	female	Finished stimuli\pefear_up_jumbled_noeyes.jpg	pe	fear	no	no	1	170	-1	7	m	m
4	19	female	Finished stimuli\mf_happy_upeyes.jpg	mf	happy	yes	yes	0	117	-1	7	z	m
4	19	female	Finished stimuli\mo_fear_upeyes.jpg	mo	fear	yes	yes	1	218	-1	7	z	z
4	19	female	Finished stimuli\cc_happy_jumblednoeyes.jpg	cc	happy	no	no	1	236	-1	7	m	m
4	19	female	Finished stimuli\pehappy_upeyes.jpg	pe	happy	yes	yes	1	325	-1	7	z	z
4	19	female	Finished stimuli\mo_hap_jumblednoeyes.jpg	mo	happy	no	no	1	194	-1	7	m	m
4	19	female	Finished stimuli\em_hap_upeyes.jpg	em	happy	yes	yes	0	196	-1	6	z	m
4	19	female	Finished stimuli\mf_fear_jumblednoeye.jpg	mf	fear	no	no	1	318	-1	7	m	m
4	19	female	Finished stimuli\wf_hap_up_noeyes.jpg	wf	happy	yes	no	1	204	-1	7	m	m
4	19	female	Finished stimuli\em_hap_noeyes.jpg	em	happy	yes	no	1	278	-1	6	m	m
4	19	female	Finished stimuli\mf_happy_jumbledeyes.jpg	mf	happy	no	yes	1	221	-1	7	z	z
4	19	female	Finished stimuli\pf_fear_jumbledeyes.jpg	pf	fear	no	yes	1	143	-1	7	z	z
4	19	female	Finished stimuli\em_fear_noeyes.jpg	em	fear	yes	no	1	179	-1	6	m	m
4	19	female	Finished stimuli\rhap_jumbled_noeyes.jpg	rh	happy	no	no	1	198	-1	6	m	m
4	19	female	Finished stimuli\rfear_jumbled_noeyess.jpg	rf	fear	no	no	1	265	-1	7	m	m
4	19	female	Finished stimuli\pefear_up_noeyes.jpg	pe	fear	yes	no	1	223	-1	6	m	m
4	19	female	Finished stimuli\cc_happy_upeyes.jpg	cc	happy	yes	yes	1	273	-1	7	z	z
4	19	female	Finished stimuli\em_fear_jumbledeyes.jpg	em	fear	no	yes	1	305	-1	7	z	z
4	19	female	Finished stimuli\pehappy_noeyes.jpg	pe	happy	yes	no	1	255	-1	6	m	m
4	19	female	Finished stimuli\mo_hap_upeyes.jpg	mo	happy	yes	yes	1	288	-1	7	z	z
4	19	female	Finished stimuli\cc_fearjumbledno_eye.jpg	cc	fear	no	no	1	199	-1	7	m	m
4	19	female	Finished stimuli\pf_fear_upeyes.jpg	pf	fear	yes	yes	1	265	-1	7	z	z
4	19	female	Finished stimuli\mo_hap_jumbledeyes.jpg	mo	happy	no	yes	1	329	-1	6	z	z
4	19	female	Finished stimuli\cc_fear_noeyes.jpg	cc	fear	yes	no	0	358	-1	7	m	z
4	19	female	Finished stimuli\jjfear_upnoeyes.jpg	jj	fear	yes	no	1	275	-1	6	m	m
4	19	female	Finished stimuli\sw_fear_jumbled_eyes.jpg	sw	fear	no	yes	1	251	-1	7	z	z
4	19	female	Finished stimuli\rhap.jpg	rh	happy	yes	yes	1	154	-1	6	z	z
4	19	female	Finished stimuli\mo_hap_up_noeyes.jpg	mo	happy	yes	no	0	159	-1	7	m	z
4	19	female	Finished stimuli\mf_fear_up_noeye.jpg	mf	fear	yes	no	1	234	-1	7	m	m
4	19	female	Finished stimuli\pefear_upeyes.jpg	pe	fear	yes	yes	1	259	-1	6	z	z
4	19	female	Finished stimuli\pf_hap_jumbledeye.jpg	pf	happy	no	yes	0	275	-1	7	z	m
4	19	female	Finished stimuli\wf_fea_jumbled_noeyes.jpg	wf	fear	no	no	1	267	-1	7	m	m
4	19	female	Finished stimuli\mo_fear_jumblednoeyes.jpg	mo	fear	no	no	1	210	-1	7	m	m
4	19	female	Finished stimuli\sw_fear_jumbled_noeyes.jpg	sw	fear	no	no	1	252	-1	6	m	m
4	19	female	Finished stimuli\JJhappyupnoeyes.jpg	JJ	happy	yes	no	0	435	-1	7	m	z
4	19	female	Finished stimuli\wf_fea_up_noeyes.jpg	wf	fear	yes	no	1	213	-1	7	m	m
4	19	female	Finished stimuli\pf_hap_upeye.jpg	pf	happy	yes	yes	1	318	-1	7	z	z
4	19	female	Finished stimuli\sw_hap_noeyes.jpg	sw	happy	yes	no	1	220	-1	7	m	m
4	19	female	Finished stimuli\rfear_upeys.jpg	rf	fear	yes	yes	1	246	-1	6	z	z
4	19	female	Finished stimuli\wf_fea_up eyes.jpg	wf	fear	yes	yes	1	191	-1	7	z	z
6	18	female	Finished stimuli\mo_fear_upnoeyes.jpg	mo	fear	yes	no	1	427	-1	6	m	m
6	18	female	Finished stimuli\cc_happy_upnoeyes.jpg	cc	happy	yes	no	1	400	-1	7	m	m
6	18	female	Finished stimuli\rfear_jumbledeyess.jpg	rf	fear	no	yes	1	798	-1	7	z	z
6	18	female	Finished stimuli\em_fear_jumblednoeyes.jpg	em	fear	no	no	1	301	-1	7	m	m
6	18	female	Finished stimuli\mf_happy_upno_eyes.jpg	mf	happy	yes	no	0	968	-1	6	m	z
6	18	female	Finished stimuli\sw_fear_jumbled_noeyes.jpg	sw	fear	no	no	1	488	-1	6	m	m
6	18	female	Finished stimuli\jjfear_jumblednoeyes.jpg	jj	fear	no	no	1	440	-1	7	m	m
6	18	female	Finished stimuli\em_hap_upeyes.jpg	em	happy	yes	yes	1	442	-1	7	z	z
6	18	female	Finished stimuli\em_fear_jumbledeyes.jpg	em	fear	no	yes	1	710	-1	7	z	z
6	18	female	Finished stimuli\sw_fear_jumbled_eyes.jpg	sw	fear	no	yes	1	451	-1	7	z	z
6	18	female	Finished stimuli\pf_hap_jumbledeye.jpg	pf	happy	no	yes	1	500	-1	6	z	z
6	18	female	Finished stimuli\mf_happy_jumbledeyes.jpg	mf	happy	no	yes	1	330	-1	6	z	z
6	18	female	Finished stimuli\wf_hap_jumbled_noeyes.jpg	wf	happy	no	no	1	399	-1	6	m	m
6	18	female	Finished stimuli\pf_hap_jumbled_noeye.jpg	pf	happy	no	no	1	626	-1	7	m	m
6	18	female	Finished stimuli\JJhappyupeyes.jpg	JJ	happy	yes	yes	1	571	-1	6	z	z
6	18	female	Finished stimuli\sw_hap_jumbled_noeyes.jpg	sw	happy	no	no	0	574	-1	7	m	z
6	18	female	Finished stimuli\mo_hap_jumblednoeyes.jpg	mo	happy	no	no	1	418	-1	7	m	m
6	18	female	Finished stimuli\cc_happy_jumbledeyes.jpg	cc	happy	no	yes	1	868	-1	7	z	z
6	18	female	Finished stimuli\mo_fear_upeyes.jpg	mo	fear	yes	yes	1	540	-1	7	z	z
6	18	female	Finished stimuli\jjfear_upeyes.jpg	jj	fear	yes	yes	1	425	-1	6	z	z
6	18	female	Finished stimuli\rhap_jumbled_noeyes.jpg	rh	happy	no	no	1	3842	-1	6	m	m
6	18	female	Finished stimuli\rhap_noeyes.jpg	rh	happy	yes	no	0	372	-1	6	m	z
6	18	female	Finished stimuli\pf_fear_up_noeyes.jpg	pf	fear	yes	no	1	456	-1	6	m	m
6	18	female	Finished stimuli\mo_fear_jumblednoeyes.jpg	mo	fear	no	no	0	641	-1	7	m	z
6	18	female	Finished stimuli\pehappy_jumbled_eyes.jpg	pe	happy	no	yes	0	481	-1	6	z	m
6	18	female	Finished stimuli\em_hap_noeyes.jpg	em	happy	yes	no	0	824	-1	6	m	z
6	18	female	Finished stimuli\mf_fear_upeye.jpg	mf	fear	yes	yes	1	241	-1	6	z	z
6	18	female	Finished stimuli\em_fear_upeyes.jpg	em	fear	yes	yes	1	394	-1	6	z	z
6	18	female	Finished stimuli\pefear_upeyes.jpg	pe	fear	yes	yes	1	317	-1	7	z	z
6	18	female	Finished stimuli\JJhappyupnoeyes.jpg	JJ	happy	yes	no	0	561	-1	6	m	z
6	18	female	Finished stimuli\jjfear_upnoeyes.jpg	jj	fear	yes	no	1	389	-1	6	m	m
6	18	female	Finished stimuli\wf_hap_up_noeyes.jpg	wf	happy	yes	no	1	680	-1	7	m	m
6	18	female	Finished stimuli\rfear_jumbled_noeyess.jpg	rf	fear	no	no	1	368	-1	7	m	m
6	18	female	Finished stimuli\sw_hap_noeyes.jpg	sw	happy	yes	no	0	508	-1	7	m	z
6	18	female	Finished stimuli\rhap.jpg	rh	happy	yes	yes	1	346	-1	6	z	z
6	18	female	Finished stimuli\cc_fear_jumbledeyes.jpg	cc	fear	no	yes	1	335	-1	7	z	z
6	18	female	Finished stimuli\em_hap_jumbledeyes.jpg	em	happy	no	yes	1	644	-1	7	z	z
6	18	female	Finished stimuli\cc_happy_jumblednoeyes.jpg	cc	happy	no	no	0	748	-1	7	m	z
6	18	female	Finished stimuli\pf_fear_jumbledeyes.jpg	pf	fear	no	yes	1	513	-1	6	z	z
6	18	female	Finished stimuli\pf_fear_upeyes.jpg	pf	fear	yes	yes	1	439	-1	6	z	z
6	18	female	Finished stimuli\cc_fear_noeyes.jpg	cc	fear	yes	no	0	640	-1	7	m	z
6	18	female	Finished stimuli\pefear_up_noeyes.jpg	pe	fear	yes	no	1	991	-1	7	m	m
6	18	female	Finished stimuli\jjfear_jumbledeyes.jpg	jj	fear	no	yes	1	298	-1	6	z	z
6	18	female	Finished stimuli\wf_fea_up_noeyes.jpg	wf	fear	yes	no	0	785	-1	7	m	z
6	18	female	Finished stimuli\sw_fear_upeyes.jpg	sw	fear	yes	yes	1	436	-1	6	z	z
6	18	female	Finished stimuli\pehappy_jumbled_no_eyes.jpg	pe	happy	no	no	0	541	-1	7	m	z
6	18	female	Finished stimuli\rfear_up_noeys.jpg	rf	fear	yes	no	1	602	-1	7	m	m
6	18	female	Finished stimuli\rfear_upeys.jpg	rf	fear	yes	yes	1	372	-1	7	z	z
6	18	female	Finished stimuli\pefear_up_jumbledeyes.jpg	pe	fear	no	yes	1	312	-1	7	z	z
6	18	female	Finished stimuli\mo_hap_up_noeyes.jpg	mo	happy	yes	no	1	438	-1	6	m	m
6	18	female	Finished stimuli\jjhap_jumbledeyes.jpg	jj	happy	no	yes	0	823	-1	7	z	m
6	18	female	Finished stimuli\cc_fearjumbledno_eye.jpg	cc	fear	no	no	0	810	-1	7	m	z
6	18	female	Finished stimuli\cc_fear_up.jpg	cc	fear	yes	yes	1	452	-1	7	z	z
6	18	female	Finished stimuli\rhap_jumbledeyes.jpg	rh	happy	no	yes	1	564	-1	6	z	z
6	18	female	Finished stimuli\JJhappyjumblednoeyes.jpg	JJ	happy	no	no	0	672	-1	6	m	z
6	18	female	Finished stimuli\sw_fear_noeyes.jpg	sw	fear	yes	no	0	416	-1	6	m	z
6	18	female	Finished stimuli\wf_fea_jumbled_noeyes.jpg	wf	fear	no	no	1	418	-1	6	m	m
6	18	female	Finished stimuli\pf_fear_jumbled_noeyes.jpg	pf	fear	no	no	1	915	-1	7	m	m
6	18	female	Finished stimuli\pehappy_upeyes.jpg	pe	happy	yes	yes	1	537	-1	6	z	z
6	18	female	Finished stimuli\pefear_up_jumbled_noeyes.jpg	pe	fear	no	no	1	694	-1	7	m	m
6	18	female	Finished stimuli\mo_hap_jumbledeyes.jpg	mo	happy	no	yes	1	373	-1	6	z	z
6	18	female	Finished stimuli\mf_happy_jumbled_noeyes.jpg	mf	happy	no	no	0	272	-1	6	m	z
6	18	female	Finished stimuli\wf_hap_upeyes.jpg	wf	happy	yes	yes	1	528	-1	6	z	z
6	18	female	Finished stimuli\mo_hap_upeyes.jpg	mo	happy	yes	yes	1	629	-1	7	z	z
6	18	female	Finished stimuli\sw_hap_upeyes.jpg	sw	happy	yes	yes	1	303	-1	7	z	z
6	18	female	Finished stimuli\pf_hap_up_noeye.jpg	pf	happy	yes	no	0	293	-1	6	m	z
6	18	female	Finished stimuli\mf_fear_up_noeye.jpg	mf	fear	yes	no	1	555	-1	6	m	m
6	18	female	Finished stimuli\pf_hap_upeye.jpg	pf	happy	yes	yes	1	360	-1	7	z	z
6	18	female	Finished stimuli\pehappy_noeyes.jpg	pe	happy	yes	no	1	491	-1	7	m	m
6	18	female	Finished stimuli\mf_fear_jumblednoeye.jpg	mf	fear	no	no	1	449	-1	7	m	m
6	18	female	Finished stimuli\wf_fea_jumbled_eyes.jpg	wf	fear	no	yes	0	1434	-1	6	z	m
6	18	female	Finished stimuli\wf_hap_jumbledeyes.jpg	wf	happy	no	yes	1	572	-1	7	z	z
6	18	female	Finished stimuli\wf_fea_up eyes.jpg	wf	fear	yes	yes	1	319	-1	7	z	z
6	18	female	Finished stimuli\sw_hap_jumbledeyes.jpg	sw	happy	no	yes	1	285	-1	7	z	z
6	18	female	Finished stimuli\mf_happy_upeyes.jpg	mf	happy	yes	yes	1	340	-1	7	z	z
6	18	female	Finished stimuli\em_fear_noeyes.jpg	em	fear	yes	no	0	528	-1	6	m	z
6	18	female	Finished stimuli\mo_fear_jumbledeyes.jpg	mo	fear	no	yes	1	333	-1	7	z	z
6	18	female	Finished stimuli\em_hap_jumblednoeyes.jpg	em	happy	no	no	1	603	-1	7	m	m
6	18	female	Finished stimuli\mf_fear_jumbledeye.jpg	mf	fear	no	yes	1	356	-1	7	z	z
6	18	female	Finished stimuli\cc_happy_upeyes.jpg	cc	happy	yes	yes	1	321	-1	6	z	z
6	18	female	Finished stimuli\em_fear_jumbledeyes.jpg	em	fear	no	yes	1	471	-1	6	z	z
6	18	female	Finished stimuli\mo_fear_upeyes.jpg	mo	fear	yes	yes	1	239	-1	6	z	z
6	18	female	Finished stimuli\wf_hap_upeyes.jpg	wf	happy	yes	yes	0	400	-1	6	z	m
6	18	female	Finished stimuli\mf_fear_up_noeye.jpg	mf	fear	yes	no	1	426	-1	6	m	m
6	18	female	Finished stimuli\wf_fea_up eyes.jpg	wf	fear	yes	yes	1	251	-1	6	z	z
6	18	female	Finished stimuli\cc_happy_upnoeyes.jpg	cc	happy	yes	no	1	364	-1	7	m	m
6	18	female	Finished stimuli\pehappy_upeyes.jpg	pe	happy	yes	yes	1	392	-1	7	z	z
6	18	female	Finished stimuli\wf_fea_jumbled_eyes.jpg	wf	fear	no	yes	1	531	-1	7	z	z
6	18	female	Finished stimuli\pf_fear_upeyes.jpg	pf	fear	yes	yes	1	384	-1	6	z	z
6	18	female	Finished stimuli\rfear_upeys.jpg	rf	fear	yes	yes	1	283	-1	6	z	z
6	18	female	Finished stimuli\pf_fear_up_noeyes.jpg	pf	fear	yes	no	1	426	-1	7	m	m
6	18	female	Finished stimuli\em_hap_jumbledeyes.jpg	em	happy	no	yes	1	667	-1	7	z	z
6	18	female	Finished stimuli\sw_hap_jumbled_noeyes.jpg	sw	happy	no	no	1	625	-1	7	m	m
6	18	female	Finished stimuli\jjhap_jumbledeyes.jpg	jj	happy	no	yes	0	747	-1	7	z	m
6	18	female	Finished stimuli\em_hap_upeyes.jpg	em	happy	yes	yes	1	375	-1	7	z	z
6	18	female	Finished stimuli\pehappy_noeyes.jpg	pe	happy	yes	no	0	419	-1	7	m	z
6	18	female	Finished stimuli\mf_happy_upeyes.jpg	mf	happy	yes	yes	1	468	-1	7	z	z
6	18	female	Finished stimuli\jjfear_jumblednoeyes.jpg	jj	fear	no	no	1	564	-1	7	m	m
6	18	female	Finished stimuli\sw_fear_noeyes.jpg	sw	fear	yes	no	0	640	-1	7	m	z
6	18	female	Finished stimuli\rhap_jumbledeyes.jpg	rh	happy	no	yes	0	1281	-1	6	z	m
6	18	female	Finished stimuli\rfear_jumbledeyess.jpg	rf	fear	no	yes	1	465	-1	7	z	z
6	18	female	Finished stimuli\sw_hap_jumbledeyes.jpg	sw	happy	no	yes	1	400	-1	7	z	z
6	18	female	Finished stimuli\rfear_up_noeys.jpg	rf	fear	yes	no	0	331	-1	6	m	z
6	18	female	Finished stimuli\rfear_jumbled_noeyess.jpg	rf	fear	no	no	1	856	-1	6	m	m
6	18	female	Finished stimuli\cc_fearjumbledno_eye.jpg	cc	fear	no	no	0	473	-1	6	m	z
6	18	female	Finished stimuli\sw_fear_jumbled_noeyes.jpg	sw	fear	no	no	0	705	-1	7	m	z
6	18	female	Finished stimuli\em_fear_upeyes.jpg	em	fear	yes	yes	1	327	-1	7	z	z
6	18	female	Finished stimuli\wf_hap_jumbledeyes.jpg	wf	happy	no	yes	0	485	-1	7	z	m
6	18	female	Finished stimuli\em_hap_noeyes.jpg	em	happy	yes	no	1	459	-1	6	m	m
6	18	female	Finished stimuli\cc_fear_up.jpg	cc	fear	yes	yes	1	427	-1	7	z	z
6	18	female	Finished stimuli\sw_fear_upeyes.jpg	sw	fear	yes	yes	1	324	-1	6	z	z
6	18	female	Finished stimuli\wf_hap_jumbled_noeyes.jpg	wf	happy	no	no	1	538	-1	6	m	m
6	18	female	Finished stimuli\pefear_up_noeyes.jpg	pe	fear	yes	no	1	582	-1	7	m	m
6	18	female	Finished stimuli\sw_hap_noeyes.jpg	sw	happy	yes	no	1	522	-1	6	m	m
6	18	female	Finished stimuli\mo_hap_jumblednoeyes.jpg	mo	happy	no	no	1	360	-1	6	m	m
6	18	female	Finished stimuli\cc_happy_upeyes.jpg	cc	happy	yes	yes	1	452	-1	6	z	z
6	18	female	Finished stimuli\cc_fear_noeyes.jpg	cc	fear	yes	no	1	381	-1	7	m	m
6	18	female	Finished stimuli\mf_happy_upno_eyes.jpg	mf	happy	yes	no	0	551	-1	6	m	z
6	18	female	Finished stimuli\pehappy_jumbled_no_eyes.jpg	pe	happy	no	no	1	436	-1	7	m	m
6	18	female	Finished stimuli\rhap_jumbled_noeyes.jpg	rh	happy	no	no	1	445	-1	6	m	m
6	18	female	Finished stimuli\wf_fea_up_noeyes.jpg	wf	fear	yes	no	1	614	-1	7	m	m
6	18	female	Finished stimuli\jjfear_upeyes.jpg	jj	fear	yes	yes	1	336	-1	7	z	z
6	18	female	Finished stimuli\mf_happy_jumbled_noeyes.jpg	mf	happy	no	no	0	348	-1	6	m	z
6	18	female	Finished stimuli\cc_happy_jumbledeyes.jpg	cc	happy	no	yes	1	361	-1	7	z	z
6	18	female	Finished stimuli\mo_fear_upnoeyes.jpg	mo	fear	yes	no	0	356	-1	7	m	z
6	18	female	Finished stimuli\em_fear_noeyes.jpg	em	fear	yes	no	0	177	-1	6	m	z
6	18	female	Finished stimuli\cc_fear_jumbledeyes.jpg	cc	fear	no	yes	1	259	-1	6	z	z
6	18	female	Finished stimuli\mo_fear_jumblednoeyes.jpg	mo	fear	no	no	0	211	-1	6	m	z
6	18	female	Finished stimuli\pefear_up_jumbled_noeyes.jpg	pe	fear	no	no	0	237	-1	7	m	z
6	18	female	Finished stimuli\rhap_noeyes.jpg	rh	happy	yes	no	1	892	-1	7	m	m
6	18	female	Finished stimuli\em_hap_jumblednoeyes.jpg	em	happy	no	no	1	586	-1	7	m	m
6	18	female	Finished stimuli\mo_hap_jumbledeyes.jpg	mo	happy	no	yes	1	518	-1	7	z	z
6	18	female	Finished stimuli\pf_hap_up_noeye.jpg	pf	happy	yes	no	0	332	-1	7	m	z
6	18	female	Finished stimuli\jjfear_jumbledeyes.jpg	jj	fear	no	yes	1	209	-1	7	z	z
6	18	female	Finished stimuli\sw_fear_jumbled_eyes.jpg	sw	fear	no	yes	1	307	-1	7	z	z
6	18	female	Finished stimuli\wf_hap_up_noeyes.jpg	wf	happy	yes	no	0	433	-1	6	m	z
6	18	female	Finished stimuli\JJhappyjumblednoeyes.jpg	JJ	happy	no	no	0	378	-1	7	m	z
6	18	female	Finished stimuli\cc_happy_jumblednoeyes.jpg	cc	happy	no	no	0	126	-1	7	m	z
6	18	female	Finished stimuli\pf_fear_jumbledeyes.jpg	pf	fear	no	yes	1	219	-1	7	z	z
6	18	female	Finished stimuli\rhap.jpg	rh	happy	yes	yes	1	196	-1	7	z	z
6	18	female	Finished stimuli\pf_hap_jumbled_noeye.jpg	pf	happy	no	no	1	575	-1	6	m	m
6	18	female	Finished stimuli\mo_hap_upeyes.jpg	mo	happy	yes	yes	1	402	-1	6	z	z
6	18	female	Finished stimuli\pefear_upeyes.jpg	pe	fear	yes	yes	1	373	-1	7	z	z
6	18	female	Finished stimuli\mo_fear_jumbledeyes.jpg	mo	fear	no	yes	1	265	-1	7	z	z
6	18	female	Finished stimuli\pf_hap_upeye.jpg	pf	happy	yes	yes	1	263	-1	7	z	z
6	18	female	Finished stimuli\pf_hap_jumbledeye.jpg	pf	happy	no	yes	1	391	-1	7	z	z
6	18	female	Finished stimuli\mo_hap_up_noeyes.jpg	mo	happy	yes	no	0	218	-1	7	m	z
6	18	female	Finished stimuli\mf_fear_jumblednoeye.jpg	mf	fear	no	no	0	227	-1	6	m	z
6	18	female	Finished stimuli\mf_fear_upeye.jpg	mf	fear	yes	yes	1	323	-1	7	z	z
6	18	female	Finished stimuli\jjfear_upnoeyes.jpg	jj	fear	yes	no	0	1297	-1	7	m	z
6	18	female	Finished stimuli\mf_fear_jumbledeye.jpg	mf	fear	no	yes	1	256	-1	7	z	z
6	18	female	Finished stimuli\wf_fea_jumbled_noeyes.jpg	wf	fear	no	no	1	760	-1	6	m	m
6	18	female	Finished stimuli\pehappy_jumbled_eyes.jpg	pe	happy	no	yes	1	308	-1	6	z	z
6	18	female	Finished stimuli\JJhappyupeyes.jpg	JJ	happy	yes	yes	1	434	-1	6	z	z
6	18	female	Finished stimuli\sw_hap_upeyes.jpg	sw	happy	yes	yes	1	475	-1	6	z	z
6	18	female	Finished stimuli\em_fear_jumblednoeyes.jpg	em	fear	no	no	1	402	-1	7	m	m
6	18	female	Finished stimuli\mf_happy_jumbledeyes.jpg	mf	happy	no	yes	1	348	-1	7	z	z
6	18	female	Finished stimuli\pf_fear_jumbled_noeyes.jpg	pf	fear	no	no	1	473	-1	7	m	m
6	18	female	Finished stimuli\pefear_up_jumbledeyes.jpg	pe	fear	no	yes	1	425	-1	7	z	z
6	18	female	Finished stimuli\JJhappyupnoeyes.jpg	JJ	happy	yes	no	0	474	-1	6	m	z
6	18	female	Finished stimuli\cc_happy_upnoeyes.jpg	cc	happy	yes	no	1	341	-1	7	m	m
6	18	female	Finished stimuli\pf_fear_up_noeyes.jpg	pf	fear	yes	no	1	410	-1	7	m	m
6	18	female	Finished stimuli\mo_hap_jumbledeyes.jpg	mo	happy	no	yes	1	300	-1	7	z	z
6	18	female	Finished stimuli\mf_happy_upeyes.jpg	mf	happy	yes	yes	1	218	-1	7	z	z
6	18	female	Finished stimuli\pf_fear_jumbled_noeyes.jpg	pf	fear	no	no	1	467	-1	7	m	m
6	18	female	Finished stimuli\jjfear_jumblednoeyes.jpg	jj	fear	no	no	1	443	-1	6	m	m
6	18	female	Finished stimuli\mo_fear_jumbledeyes.jpg	mo	fear	no	yes	1	364	-1	7	z	z
6	18	female	Finished stimuli\pf_hap_up_noeye.jpg	pf	happy	yes	no	0	224	-1	7	m	z
6	18	female	Finished stimuli\mf_fear_jumblednoeye.jpg	mf	fear	no	no	0	217	-1	7	m	z
6	18	female	Finished stimuli\jjfear_upnoeyes.jpg	jj	fear	yes	no	0	331	-1	7	m	z
6	18	female	Finished stimuli\pf_hap_upeye.jpg	pf	happy	yes	yes	1	464	-1	7	z	z
6	18	female	Finished stimuli\rfear_jumbledeyess.jpg	rf	fear	no	yes	1	424	-1	7	z	z
6	18	female	Finished stimuli\cc_happy_jumbledeyes.jpg	cc	happy	no	yes	1	338	-1	7	z	z
6	18	female	Finished stimuli\sw_fear_jumbled_noeyes.jpg	sw	fear	no	no	0	399	-1	7	m	z
6	18	female	Finished stimuli\rhap.jpg	rh	happy	yes	yes	1	313	-1	7	z	z
6	18	female	Finished stimuli\pf_fear_jumbledeyes.jpg	pf	fear	no	yes	1	247	-1	6	z	z
6	18	female	Finished stimuli\pefear_up_noeyes.jpg	pe	fear	yes	no	1	509	-1	7	m	m
6	18	female	Finished stimuli\em_hap_upeyes.jpg	em	happy	yes	yes	1	619	-1	7	z	z
6	18	female	Finished stimuli\cc_happy_upeyes.jpg	cc	happy	yes	yes	1	373	-1	7	z	z
6	18	female	Finished stimuli\cc_fear_jumbledeyes.jpg	cc	fear	no	yes	1	393	-1	6	z	z
6	18	female	Finished stimuli\wf_hap_jumbled_noeyes.jpg	wf	happy	no	no	1	468	-1	7	m	m
6	18	female	Finished stimuli\wf_fea_jumbled_eyes.jpg	wf	fear	no	yes	1	1212	-1	7	z	z
6	18	female	Finished stimuli\mf_happy_jumbled_noeyes.jpg	mf	happy	no	no	1	469	-1	6	m	m
6	18	female	Finished stimuli\sw_fear_jumbled_eyes.jpg	sw	fear	no	yes	1	453	-1	6	z	z
6	18	female	Finished stimuli\sw_hap_upeyes.jpg	sw	happy	yes	yes	1	326	-1	7	z	z
6	18	female	Finished stimuli\mo_fear_jumblednoeyes.jpg	mo	fear	no	no	0	379	-1	7	m	z
6	18	female	Finished stimuli\wf_hap_jumbledeyes.jpg	wf	happy	no	yes	0	414	-1	6	z	m
6	18	female	Finished stimuli\jjhap_jumbledeyes.jpg	jj	happy	no	yes	1	280	-1	6	z	z
6	18	female	Finished stimuli\JJhappyjumblednoeyes.jpg	JJ	happy	no	no	0	487	-1	6	m	z
6	18	female	Finished stimuli\mo_hap_upeyes.jpg	mo	happy	yes	yes	1	326	-1	7	z	z
6	18	female	Finished stimuli\rfear_up_noeys.jpg	rf	fear	yes	no	0	364	-1	7	m	z
6	18	female	Finished stimuli\jjfear_upeyes.jpg	jj	fear	yes	yes	1	383	-1	7	z	z
6	18	female	Finished stimuli\em_hap_noeyes.jpg	em	happy	yes	no	0	483	-1	7	m	z
6	18	female	Finished stimuli\rfear_upeys.jpg	rf	fear	yes	yes	1	361	-1	6	z	z
6	18	female	Finished stimuli\em_hap_jumblednoeyes.jpg	em	happy	no	no	1	549	-1	7	m	m
6	18	female	Finished stimuli\rhap_noeyes.jpg	rh	happy	yes	no	0	457	-1	7	m	z
6	18	female	Finished stimuli\mf_fear_jumbledeye.jpg	mf	fear	no	yes	1	329	-1	7	z	z
6	18	female	Finished stimuli\sw_fear_noeyes.jpg	sw	fear	yes	no	0	318	-1	7	m	z
6	18	female	Finished stimuli\mo_fear_upeyes.jpg	mo	fear	yes	yes	1	292	-1	7	z	z
6	18	female	Finished stimuli\rhap_jumbledeyes.jpg	rh	happy	no	yes	0	827	-1	7	z	m
6	18	female	Finished stimuli\em_fear_noeyes.jpg	em	fear	yes	no	0	356	-1	7	m	z
6	18	female	Finished stimuli\sw_hap_jumbledeyes.jpg	sw	happy	no	yes	1	337	-1	7	z	z
6	18	female	Finished stimuli\wf_fea_jumbled_noeyes.jpg	wf	fear	no	no	0	350	-1	6	m	z
6	18	female	Finished stimuli\cc_happy_jumblednoeyes.jpg	cc	happy	no	no	1	426	-1	7	m	m
6	18	female	Finished stimuli\pefear_up_jumbledeyes.jpg	pe	fear	no	yes	1	252	-1	7	z	z
6	18	female	Finished stimuli\mo_fear_upnoeyes.jpg	mo	fear	yes	no	0	236	-1	6	m	z
6	18	female	Finished stimuli\mf_fear_up_noeye.jpg	mf	fear	yes	no	0	253	-1	7	m	z
6	18	female	Finished stimuli\jjfear_jumbledeyes.jpg	jj	fear	no	yes	1	269	-1	6	z	z
6	18	female	Finished stimuli\pefear_upeyes.jpg	pe	fear	yes	yes	1	309	-1	6	z	z
6	18	female	Finished stimuli\pf_fear_upeyes.jpg	pf	fear	yes	yes	1	323	-1	6	z	z
6	18	female	Finished stimuli\pf_hap_jumbled_noeye.jpg	pf	happy	no	no	0	305	-1	7	m	z
6	18	female	Finished stimuli\cc_fearjumbledno_eye.jpg	cc	fear	no	no	1	447	-1	7	m	m
6	18	female	Finished stimuli\sw_fear_upeyes.jpg	sw	fear	yes	yes	1	383	-1	7	z	z
6	18	female	Finished stimuli\pf_hap_jumbledeye.jpg	pf	happy	no	yes	1	322	-1	6	z	z
6	18	female	Finished stimuli\em_fear_jumbledeyes.jpg	em	fear	no	yes	1	280	-1	6	z	z
6	18	female	Finished stimuli\sw_hap_jumbled_noeyes.jpg	sw	happy	no	no	1	422	-1	7	m	m
6	18	female	Finished stimuli\mo_hap_jumblednoeyes.jpg	mo	happy	no	no	1	504	-1	7	m	m
6	18	female	Finished stimuli\wf_hap_upeyes.jpg	wf	happy	yes	yes	1	494	-1	6	z	z
6	18	female	Finished stimuli\pehappy_noeyes.jpg	pe	happy	yes	no	0	357	-1	7	m	z
6	18	female	Finished stimuli\em_fear_upeyes.jpg	em	fear	yes	yes	1	385	-1	7	z	z
6	18	female	Finished stimuli\em_fear_jumblednoeyes.jpg	em	fear	no	no	1	429	-1	7	m	m
6	18	female	Finished stimuli\wf_fea_up_noeyes.jpg	wf	fear	yes	no	0	406	-1	7	m	z
6	18	female	Finished stimuli\pefear_up_jumbled_noeyes.jpg	pe	fear	no	no	1	464	-1	7	m	m
6	18	female	Finished stimuli\rfear_jumbled_noeyess.jpg	rf	fear	no	no	1	449	-1	7	m	m
6	18	female	Finished stimuli\wf_hap_up_noeyes.jpg	wf	happy	yes	no	0	338	-1	7	m	z
6	18	female	Finished stimuli\pehappy_jumbled_eyes.jpg	pe	happy	no	yes	1	439	-1	6	z	z
6	18	female	Finished stimuli\cc_fear_noeyes.jpg	cc	fear	yes	no	0	256	-1	7	m	z
6	18	female	Finished stimuli\JJhappyupeyes.jpg	JJ	happy	yes	yes	1	545	-1	7	z	z
6	18	female	Finished stimuli\wf_fea_up eyes.jpg	wf	fear	yes	yes	1	349	-1	7	z	z
6	18	female	Finished stimuli\em_hap_jumbledeyes.jpg	em	happy	no	yes	1	794	-1	6	z	z
6	18	female	Finished stimuli\mf_happy_jumbledeyes.jpg	mf	happy	no	yes	1	577	-1	7	z	z
6	18	female	Finished stimuli\cc_fear_up.jpg	cc	fear	yes	yes	1	380	-1	7	z	z
6	18	female	Finished stimuli\JJhappyupnoeyes.jpg	JJ	happy	yes	no	0	302	-1	7	m	z
6	18	female	Finished stimuli\mo_hap_up_noeyes.jpg	mo	happy	yes	no	0	452	-1	7	m	z
6	18	female	Finished stimuli\sw_hap_noeyes.jpg	sw	happy	yes	no	1	492	-1	6	m	m
6	18	female	Finished stimuli\rhap_jumbled_noeyes.jpg	rh	happy	no	no	1	587	-1	7	m	m
6	18	female	Finished stimuli\mf_fear_upeye.jpg	mf	fear	yes	yes	1	501	-1	7	z	z
6	18	female	Finished stimuli\mf_happy_upno_eyes.jpg	mf	happy	yes	no	1	404	-1	6	m	m
6	18	female	Finished stimuli\pehappy_jumbled_no_eyes.jpg	pe	happy	no	no	0	567	-1	7	m	z
6	18	female	Finished stimuli\pehappy_upeyes.jpg	pe	happy	yes	yes	1	371	-1	7	z	z
6	18	female	Finished stimuli\em_fear_jumbledeyes.jpg	em	fear	no	yes	1	346	-1	6	z	z
6	18	female	Finished stimuli\pf_fear_jumbled_noeyes.jpg	pf	fear	no	no	0	246	-1	7	m	z
6	18	female	Finished stimuli\wf_fea_up eyes.jpg	wf	fear	yes	yes	1	206	-1	6	z	z
6	18	female	Finished stimuli\rfear_jumbled_noeyess.jpg	rf	fear	no	no	1	433	-1	7	m	m
6	18	female	Finished stimuli\pefear_up_noeyes.jpg	pe	fear	yes	no	1	264	-1	7	m	m
6	18	female	Finished stimuli\JJhappyupnoeyes.jpg	JJ	happy	yes	no	0	431	-1	6	m	z
6	18	female	Finished stimuli\cc_happy_jumbledeyes.jpg	cc	happy	no	yes	1	392	-1	6	z	z
6	18	female	Finished stimuli\pehappy_upeyes.jpg	pe	happy	yes	yes	1	267	-1	7	z	z
6	18	female	Finished stimuli\wf_hap_jumbledeyes.jpg	wf	happy	no	yes	1	555	-1	7	z	z
6	18	female	Finished stimuli\sw_fear_upeyes.jpg	sw	fear	yes	yes	1	215	-1	6	z	z
6	18	female	Finished stimuli\pf_hap_jumbled_noeye.jpg	pf	happy	no	no	1	417	-1	6	m	m
6	18	female	Finished stimuli\JJhappyjumblednoeyes.jpg	JJ	happy	no	no	1	443	-1	6	m	m
6	18	female	Finished stimuli\wf_hap_jumbled_noeyes.jpg	wf	happy	no	no	1	331	-1	7	m	m
6	18	female	Finished stimuli\cc_fear_noeyes.jpg	cc	fear	yes	no	0	513	-1	7	m	z
6	18	female	Finished stimuli\pf_hap_up_noeye.jpg	pf	happy	yes	no	0	431	-1	7	m	z
6	18	female	Finished stimuli\rhap_jumbledeyes.jpg	rh	happy	no	yes	0	744	-1	7	z	m
6	18	female	Finished stimuli\sw_hap_jumbled_noeyes.jpg	sw	happy	no	no	1	443	-1	6	m	m
6	18	female	Finished stimuli\sw_fear_jumbled_noeyes.jpg	sw	fear	no	no	1	396	-1	7	m	m
6	18	female	Finished stimuli\pf_fear_up_noeyes.jpg	pf	fear	yes	no	1	318	-1	7	m	m
6	18	female	Finished stimuli\mf_happy_jumbledeyes.jpg	mf	happy	no	yes	1	410	-1	7	z	z
6	18	female	Finished stimuli\pf_hap_upeye.jpg	pf	happy	yes	yes	1	380	-1	7	z	z
6	18	female	Finished stimuli\wf_fea_jumbled_eyes.jpg	wf	fear	no	yes	1	336	-1	7	z	z
6	18	female	Finished stimuli\JJhappyupeyes.jpg	JJ	happy	yes	yes	1	333	-1	7	z	z
6	18	female	Finished stimuli\mf_fear_jumbledeye.jpg	mf	fear	no	yes	1	329	-1	7	z	z
6	18	female	Finished stimuli\em_hap_noeyes.jpg	em	happy	yes	no	1	535	-1	7	m	m
6	18	female	Finished stimuli\sw_fear_noeyes.jpg	sw	fear	yes	no	0	348	-1	7	m	z
6	18	female	Finished stimuli\pehappy_jumbled_eyes.jpg	pe	happy	no	yes	0	632	-1	7	z	m
6	18	female	Finished stimuli\mo_hap_jumblednoeyes.jpg	mo	happy	no	no	1	418	-1	7	m	m
6	18	female	Finished stimuli\wf_fea_jumbled_noeyes.jpg	wf	fear	no	no	1	348	-1	7	m	m
6	18	female	Finished stimuli\sw_fear_jumbled_eyes.jpg	sw	fear	no	yes	1	480	-1	6	z	z
6	18	female	Finished stimuli\em_hap_jumblednoeyes.jpg	em	happy	no	no	0	311	-1	7	m	z
6	18	female	Finished stimuli\pefear_upeyes.jpg	pe	fear	yes	yes	1	325	-1	6	z	z
6	18	female	Finished stimuli\rfear_upeys.jpg	rf	fear	yes	yes	1	354	-1	7	z	z
6	18	female	Finished stimuli\pf_fear_jumbledeyes.jpg	pf	fear	no	yes	1	255	-1	7	z	z
6	18	female	Finished stimuli\pf_fear_upeyes.jpg	pf	fear	yes	yes	1	271	-1	7	z	z
6	18	female	Finished stimuli\cc_fear_up.jpg	cc	fear	yes	yes	1	295	-1	6	z	z
6	18	female	Finished stimuli\mf_happy_upno_eyes.jpg	mf	happy	yes	no	0	541	-1	6	m	z
6	18	female	Finished stimuli\mf_fear_up_noeye.jpg	mf	fear	yes	no	1	458	-1	7	m	m
6	18	female	Finished stimuli\rhap_noeyes.jpg	rh	happy	yes	no	0	473	-1	6	m	z
6	18	female	Finished stimuli\em_fear_jumblednoeyes.jpg	em	fear	no	no	0	401	-1	6	m	z
6	18	female	Finished stimuli\mo_hap_upeyes.jpg	mo	happy	yes	yes	1	507	-1	6	z	z
6	18	female	Finished stimuli\jjhap_jumbledeyes.jpg	jj	happy	no	yes	0	698	-1	7	z	m
6	18	female	Finished stimuli\mo_fear_upnoeyes.jpg	mo	fear	yes	no	1	448	-1	7	m	m
6	18	female	Finished stimuli\mf_happy_jumbled_noeyes.jpg	mf	happy	no	no	1	832	-1	6	m	m
6	18	female	Finished stimuli\wf_fea_up_noeyes.jpg	wf	fear	yes	no	0	418	-1	7	m	z
6	18	female	Finished stimuli\em_fear_noeyes.jpg	em	fear	yes	no	1	635	-1	7	m	m
6	18	female	Finished stimuli\em_hap_upeyes.jpg	em	happy	yes	yes	1	309	-1	7	z	z
6	18	female	Finished stimuli\rhap.jpg	rh	happy	yes	yes	1	363	-1	7	z	z
6	18	female	Finished stimuli\wf_hap_up_noeyes.jpg	wf	happy	yes	no	0	263	-1	7	m	z
6	18	female	Finished stimuli\mo_hap_jumbledeyes.jpg	mo	happy	no	yes	1	182	-1	7	z	z
6	18	female	Finished stimuli\em_hap_jumbledeyes.jpg	em	happy	no	yes	1	513	-1	7	z	z
6	18	female	Finished stimuli\pefear_up_jumbledeyes.jpg	pe	fear	no	yes	1	279	-1	7	z	z
6	18	female	Finished stimuli\mf_fear_upeye.jpg	mf	fear	yes	yes	1	286	-1	6	z	z
6	18	female	Finished stimuli\rfear_jumbledeyess.jpg	rf	fear	no	yes	1	285	-1	6	z	z
6	18	female	Finished stimuli\cc_fearjumbledno_eye.jpg	cc	fear	no	no	0	828	-1	7	m	z
6	18	female	Finished stimuli\jjfear_upnoeyes.jpg	jj	fear	yes	no	1	374	-1	7	m	m
6	18	female	Finished stimuli\mf_fear_jumblednoeye.jpg	mf	fear	no	no	0	248	-1	7	m	z
6	18	female	Finished stimuli\pehappy_noeyes.jpg	pe	happy	yes	no	0	264	-1	7	m	z
6	18	female	Finished stimuli\rfear_up_noeys.jpg	rf	fear	yes	no	0	248	-1	6	m	z
6	18	female	Finished stimuli\pf_hap_jumbledeye.jpg	pf	happy	no	yes	1	689	-1	7	z	z
6	18	female	Finished stimuli\mo_fear_upeyes.jpg	mo	fear	yes	yes	1	304	-1	6	z	z
6	18	female	Finished stimuli\mo_hap_up_noeyes.jpg	mo	happy	yes	no	0	647	-1	7	m	z
6	18	female	Finished stimuli\jjfear_jumblednoeyes.jpg	jj	fear	no	no	1	423	-1	6	m	m
6	18	female	Finished stimuli\sw_hap_upeyes.jpg	sw	happy	yes	yes	0	457	-1	6	z	m
6	18	female	Finished stimuli\mo_fear_jumblednoeyes.jpg	mo	fear	no	no	1	506	-1	7	m	m
6	18	female	Finished stimuli\jjfear_jumbledeyes.jpg	jj	fear	no	yes	1	344	-1	6	z	z
6	18	female	Finished stimuli\cc_happy_upeyes.jpg	cc	happy	yes	yes	1	293	-1	7	z	z
6	18	female	Finished stimuli\rhap_jumbled_noeyes.jpg	rh	happy	no	no	1	499	-1	7	m	m
6	18	female	Finished stimuli\wf_hap_upeyes.jpg	wf	happy	yes	yes	1	378	-1	7	z	z
6	18	female	Finished stimuli\cc_happy_upnoeyes.jpg	cc	happy	yes	no	1	357	-1	6	m	m
6	18	female	Finished stimuli\cc_happy_jumblednoeyes.jpg	cc	happy	no	no	0	1322	-1	7	m	z
6	18	female	Finished stimuli\sw_hap_jumbledeyes.jpg	sw	happy	no	yes	1	368	-1	7	z	z
6	18	female	Finished stimuli\cc_fear_jumbledeyes.jpg	cc	fear	no	yes	1	436	-1	7	z	z
6	18	female	Finished stimuli\pehappy_jumbled_no_eyes.jpg	pe	happy	no	no	0	397	-1	6	m	z
6	18	female	Finished stimuli\em_fear_upeyes.jpg	em	fear	yes	yes	1	303	-1	7	z	z
6	18	female	Finished stimuli\mo_fear_jumbledeyes.jpg	mo	fear	no	yes	1	389	-1	6	z	z
6	18	female	Finished stimuli\pefear_up_jumbled_noeyes.jpg	pe	fear	no	no	1	2232	-1	6	m	m
6	18	female	Finished stimuli\jjfear_upeyes.jpg	jj	fear	yes	yes	1	538	-1	6	z	z
6	18	female	Finished stimuli\sw_hap_noeyes.jpg	sw	happy	yes	no	0	815	-1	7	m	z
6	18	female	Finished stimuli\mf_happy_upeyes.jpg	mf	happy	yes	yes	1	409	-1	7	z	z
3	19	female	Finished stimuli\wf_hap_jumbledeyes.jpg	wf	happy	no	yes	0	3761	-1	0	z	m
3	19	female	Finished stimuli\wf_hap_jumbled_noeyes.jpg	wf	happy	no	no	0	1504	-1	0	m	z
3	19	female	Finished stimuli\cc_fearjumbledno_eye.jpg	cc	fear	no	no	0	1145	-1	0	m	z
3	19	female	Finished stimuli\jjhap_jumbledeyes.jpg	jj	happy	no	yes	1	777	-1	0	z	z
3	19	female	Finished stimuli\wf_fea_jumbled_noeyes.jpg	wf	fear	no	no	0	743	-1	0	m	z
3	19	female	Finished stimuli\sw_fear_noeyes.jpg	sw	fear	yes	no	1	758	-1	0	m	m
3	19	female	Finished stimuli\JJhappyupnoeyes.jpg	JJ	happy	yes	no	0	548	-1	0	m	z
3	19	female	Finished stimuli\mf_happy_jumbledeyes.jpg	mf	happy	no	yes	1	546	-1	0	z	z
3	19	female	Finished stimuli\pf_fear_jumbledeyes.jpg	pf	fear	no	yes	1	346	-1	0	z	z
3	19	female	Finished stimuli\mf_happy_jumbled_noeyes.jpg	mf	happy	no	no	1	368	-1	0	m	m
3	19	female	Finished stimuli\rhap_noeyes.jpg	rh	happy	yes	no	1	678	-1	16	m	m
3	19	female	Finished stimuli\rhap.jpg	rh	happy	yes	yes	1	344	-1	0	z	z
3	19	female	Finished stimuli\pefear_up_noeyes.jpg	pe	fear	yes	no	1	374	-1	0	m	m
3	19	female	Finished stimuli\mf_fear_upeye.jpg	mf	fear	yes	yes	1	348	-1	0	z	z
3	19	female	Finished stimuli\pefear_up_jumbled_noeyes.jpg	pe	fear	no	no	1	515	-1	0	m	m
3	19	female	Finished stimuli\pehappy_upeyes.jpg	pe	happy	yes	yes	1	500	-1	0	z	z
3	19	female	Finished stimuli\sw_hap_jumbled_noeyes.jpg	sw	happy	no	no	1	388	-1	0	m	m
3	19	female	Finished stimuli\mf_fear_jumblednoeye.jpg	mf	fear	no	no	1	440	-1	0	m	m
3	19	female	Finished stimuli\em_fear_jumbledeyes.jpg	em	fear	no	yes	1	372	-1	0	z	z
3	19	female	Finished stimuli\jjfear_upeyes.jpg	jj	fear	yes	yes	1	370	-1	16	z	z
3	19	female	Finished stimuli\pf_hap_jumbledeye.jpg	pf	happy	no	yes	1	1051	5	0	z	z
3	19	female	Finished stimuli\mf_fear_up_noeye.jpg	mf	fear	yes	no	1	386	3	0	m	m
3	19	female	Finished stimuli\sw_hap_upeyes.jpg	sw	happy	yes	yes	1	507	2	16	z	z
3	19	female	Finished stimuli\JJhappyupeyes.jpg	JJ	happy	yes	yes	1	448	2	0	z	z
3	19	female	Finished stimuli\wf_fea_up_noeyes.jpg	wf	fear	yes	no	0	632	2	0	m	z
3	19	female	Finished stimuli\cc_happy_upnoeyes.jpg	cc	happy	yes	no	1	359	2	0	m	m
3	19	female	Finished stimuli\mo_hap_jumbledeyes.jpg	mo	happy	no	yes	1	409	2	0	z	z
3	19	female	Finished stimuli\rfear_jumbledeyess.jpg	rf	fear	no	yes	1	553	2	16	z	z
3	19	female	Finished stimuli\wf_fea_up eyes.jpg	wf	fear	yes	yes	1	404	2	0	z	z
3	19	female	Finished stimuli\cc_happy_jumblednoeyes.jpg	cc	happy	no	no	1	446	2	0	m	m
3	19	female	Finished stimuli\em_hap_upeyes.jpg	em	happy	yes	yes	1	453	3	0	z	z
3	19	female	Finished stimuli\rhap_jumbled_noeyes.jpg	rh	happy	no	no	1	444	2	0	m	m
3	19	female	Finished stimuli\sw_fear_upeyes.jpg	sw	fear	yes	yes	1	323	2	0	z	z
3	19	female	Finished stimuli\mo_hap_upeyes.jpg	mo	happy	yes	yes	1	503	2	0	z	z
3	19	female	Finished stimuli\pehappy_noeyes.jpg	pe	happy	yes	no	0	365	2	0	m	z
3	19	female	Finished stimuli\mo_fear_upeyes.jpg	mo	fear	yes	yes	1	367	3	0	z	z
3	19	female	Finished stimuli\rfear_jumbled_noeyess.jpg	rf	fear	no	no	1	858	2	0	m	m
3	19	female	Finished stimuli\cc_fear_up.jpg	cc	fear	yes	yes	1	321	3	0	z	z
3	19	female	Finished stimuli\mf_fear_jumbledeye.jpg	mf	fear	no	yes	1	333	3	0	z	z
3	19	female	Finished stimuli\mo_hap_up_noeyes.jpg	mo	happy	yes	no	1	432	2	16	m	m
3	19	female	Finished stimuli\rhap_jumbledeyes.jpg	rh	happy	no	yes	0	949	5	14	z	m
3	19	female	Finished stimuli\wf_hap_upeyes.jpg	wf	happy	yes	yes	0	305	3	14	z	m
3	19	female	Finished stimuli\cc_fear_jumbledeyes.jpg	cc	fear	no	yes	1	463	3	14	z	z
3	19	female	Finished stimuli\em_hap_jumblednoeyes.jpg	em	happy	no	no	0	486	2	13	m	z
3	19	female	Finished stimuli\cc_fear_noeyes.jpg	cc	fear	yes	no	0	453	2	13	m	z
3	19	female	Finished stimuli\cc_happy_upeyes.jpg	cc	happy	yes	yes	1	236	2	13	z	z
3	19	female	Finished stimuli\pefear_upeyes.jpg	pe	fear	yes	yes	1	405	2	13	z	z
3	19	female	Finished stimuli\mo_fear_jumblednoeyes.jpg	mo	fear	no	no	1	431	3	14	m	m
3	19	female	Finished stimuli\mo_fear_upnoeyes.jpg	mo	fear	yes	no	0	567	2	13	m	z
3	19	female	Finished stimuli\rfear_up_noeys.jpg	rf	fear	yes	no	0	443	3	14	m	z
3	19	female	Finished stimuli\wf_hap_up_noeyes.jpg	wf	happy	yes	no	0	370	2	13	m	z
3	19	female	Finished stimuli\pf_fear_upeyes.jpg	pf	fear	yes	yes	1	381	2	13	z	z
3	19	female	Finished stimuli\mo_hap_jumblednoeyes.jpg	mo	happy	no	no	1	384	3	14	m	m
3	19	female	Finished stimuli\sw_hap_noeyes.jpg	sw	happy	yes	no	0	601	2	13	m	z
3	19	female	Finished stimuli\cc_happy_jumbledeyes.jpg	cc	happy	no	yes	1	523	2	13	z	z
3	19	female	Finished stimuli\jjfear_jumbledeyes.jpg	jj	fear	no	yes	1	313	2	13	z	z
3	19	female	Finished stimuli\em_hap_jumbledeyes.jpg	em	happy	no	yes	1	678	3	14	z	z
3	19	female	Finished stimuli\mf_happy_upno_eyes.jpg	mf	happy	yes	no	0	884	3	14	m	z
3	19	female	Finished stimuli\pehappy_jumbled_no_eyes.jpg	pe	happy	no	no	0	474	2	13	m	z
3	19	female	Finished stimuli\sw_fear_jumbled_eyes.jpg	sw	fear	no	yes	1	314	3	14	z	z
3	19	female	Finished stimuli\jjfear_jumblednoeyes.jpg	jj	fear	no	no	1	681	4	6	m	m
3	19	female	Finished stimuli\pf_fear_up_noeyes.jpg	pf	fear	yes	no	0	472	3	7	m	z
3	19	female	Finished stimuli\pefear_up_jumbledeyes.jpg	pe	fear	no	yes	1	376	3	7	z	z
3	19	female	Finished stimuli\rfear_upeys.jpg	rf	fear	yes	yes	1	347	3	7	z	z
3	19	female	Finished stimuli\em_fear_upeyes.jpg	em	fear	yes	yes	1	343	2	6	z	z
3	19	female	Finished stimuli\pf_fear_jumbled_noeyes.jpg	pf	fear	no	no	1	540	3	7	m	m
3	19	female	Finished stimuli\em_fear_noeyes.jpg	em	fear	yes	no	1	577	2	7	m	m
3	19	female	Finished stimuli\JJhappyjumblednoeyes.jpg	JJ	happy	no	no	0	836	2	6	m	z
3	19	female	Finished stimuli\pf_hap_up_noeye.jpg	pf	happy	yes	no	0	469	3	7	m	z
3	19	female	Finished stimuli\wf_fea_jumbled_eyes.jpg	wf	fear	no	yes	1	437	3	7	z	z
3	19	female	Finished stimuli\em_hap_noeyes.jpg	em	happy	yes	no	0	511	2	7	m	z
3	19	female	Finished stimuli\mf_happy_upeyes.jpg	mf	happy	yes	yes	1	332	2	6	z	z
3	19	female	Finished stimuli\jjfear_upnoeyes.jpg	jj	fear	yes	no	0	857	2	6	m	z
3	19	female	Finished stimuli\sw_fear_jumbled_noeyes.jpg	sw	fear	no	no	0	810	2	7	m	z
3	19	female	Finished stimuli\sw_hap_jumbledeyes.jpg	sw	happy	no	yes	1	476	2	6	z	z
3	19	female	Finished stimuli\em_fear_jumblednoeyes.jpg	em	fear	no	no	1	1131	2	6	m	m
3	19	female	Finished stimuli\pf_hap_upeye.jpg	pf	happy	yes	yes	1	489	2	7	z	z
3	19	female	Finished stimuli\pehappy_jumbled_eyes.jpg	pe	happy	no	yes	1	560	2	6	z	z
[truncated: 5,042 more rows]
