# Supplementary material for: The perceptual saliency of fearful eyes and smiles: A signal detection study
Source: PLoS One. 2017 Mar 7;12(3):e0173199. doi: 10.1371/journal.pone.0173199 (PMC5340363; doi:10.1371/journal.pone.0173199)
Supplement: S4 Fig — The overall data pertaining to experiment 3b. (XLSX) [file pone.0173199.s004.xlsx]

## Sheet: Exp3B_Zara_N20
E:\Eye Detection Data\Zara 27112013\MouthDetection_Exp\Standard\Exp3B mouth N20 upload.emrg2
ExperimentName:= Exp V1 Mmouth Znomouth,= Exp V1 Zmouth Mnomouth
Subject	Age	Sex	Stimuli	face	Expression	canonical	Mouth	RespFaceNoface.ACC	RespFaceNoface.RT	RespFaceNoface.CRESP	RespFaceNoface.RESP	BackwardMask.OnsetDelay	Target.OnsetToOnsetTime
1	18	male	Mouth\em_happy_up_no_mouth.jpg	em	happy	yes	no	1	570	z	z	7	67
1	18	male	Mouth\sw_fear_jumbled_mouth.jpg	sw	fear	no	yes	0	314	m	z	7	67
1	18	male	Mouth\cc_fear_jumbled_mouth.jpg	cc	fear	no	yes	1	1482	m	m	7	67
1	18	male	Mouth\em_happy_jumbled_mouth.jpg	em	happy	no	yes	1	225	m	m	7	67
1	18	male	Mouth\mf_fear_jumbled_mouth.jpg	mf	fear	no	yes	1	230	m	m	6	66
1	18	male	Mouth\r_fear_up_mouth.jpg	r_	fear	yes	yes	0	335	m	z	7	67
1	18	male	Mouth\cc_happy_jumbled_mouth.jpg	cc	happy	no	yes	1	245	m	m	7	67
1	18	male	Mouth\wf_happy_jumbled_no_mouth.jpg	wf	happy	no	no	0	293	z	m	6	66
1	18	male	Mouth\wf_happy_up_mouth.jpg	wf	happy	yes	yes	0	364	m	z	7	67
1	18	male	Mouth\cc_happy_jumbled_no_mouth.jpg	cc	happy	no	no	0	367	z	m	7	67
1	18	male	Mouth\pe_fear_jumbled_mouth.jpg	pe	fear	no	yes	1	235	m	m	7	67
1	18	male	Mouth\r_fear_jumbled_no_mouth.jpg	r_	fear	no	no	1	931	z	z	7	67
1	18	male	Mouth\mf_fear_up_mouth.jpg	mf	fear	yes	yes	0	424	m	z	6	66
1	18	male	Mouth\mf_happy_jumbled_mouth.jpg	mf	happy	no	yes	1	177	m	m	7	67
1	18	male	Mouth\cc_fear_jumbled_no_mouth.jpg	cc	fear	no	no	1	541	z	z	7	67
1	18	male	Mouth\em_happy_jumbled_no_mouth.jpg	em	happy	no	no	1	394	z	z	7	67
1	18	male	Mouth\wf_fear_jumbled_mouth.jpg	wf	fear	no	yes	1	172	m	m	7	67
1	18	male	Mouth\mf_happy_up_mouth.jpg	mf	happy	yes	yes	1	392	m	m	7	67
1	18	male	Mouth\pe_fear_up_no_mouth.jpg	pe	fear	yes	no	0	218	z	m	6	66
1	18	male	Mouth\jj_happy_jumbled_no_mouth.jpg	jj	happy	no	no	1	252	z	z	7	67
1	18	male	Mouth\mf_fear_jumbled_no_mouth.jpg	mf	fear	no	no	1	484	z	z	7	67
1	18	male	Mouth\mo_fear_up_mouth.jpg	mo	fear	yes	yes	0	547	m	z	6	66
1	18	male	Mouth\pe_happy_jumbled_no_mouth.jpg	pe	happy	no	no	0	424	z	m	7	67
1	18	male	Mouth\cc_happy_up_mouth.jpg	cc	happy	yes	yes	1	353	m	m	7	67
1	18	male	Mouth\mo_fear_jumbled_no_mouth.jpg	mo	fear	no	no	1	550	z	z	6	66
1	18	male	Mouth\em_fear_jumbled_no_mouth.jpg	em	fear	no	no	0	147	z	m	7	67
1	18	male	Mouth\wf_fear_up_mouth.jpg	wf	fear	yes	yes	1	239	m	m	6	66
1	18	male	Mouth\mo_happy_jumbled_no_mouth.jpg	mo	happy	no	no	1	448	z	z	6	66
1	18	male	Mouth\r_fear_up_no_mouth.jpg	r_	fear	yes	no	0	329	z	m	7	67
1	18	male	Mouth\r_happy_up_no_mouth.jpg	r_	happy	yes	no	0	414	z	m	6	66
1	18	male	Mouth\jj_fear_up_no_mouth.jpg	jj	fear	yes	no	1	600	z	z	7	67
1	18	male	Mouth\sw_fear_up_no_mouth.jpg	sw	fear	yes	no	1	545	z	z	7	67
1	18	male	Mouth\sw_happy_up_no_mouth.jpg	sw	happy	yes	no	0	222	z	m	6	66
1	18	male	Mouth\sw_happy_jumbled_no_mouth.jpg	sw	happy	no	no	1	463	z	z	6	66
1	18	male	Mouth\pf_happy_up_mouth.jpg	pf	happy	yes	yes	0	671	m	z	6	66
1	18	male	Mouth\jj_fear_jumbled_mouth.jpg	jj	fear	no	yes	1	239	m	m	6	66
1	18	male	Mouth\em_fear_up_mouth.jpg	em	fear	yes	yes	1	256	m	m	7	67
1	18	male	Mouth\r_happy_up_mouth.jpg	r_	happy	yes	yes	1	129	m	m	7	67
1	18	male	Mouth\pe_happy_up_mouth.jpg	pe	happy	yes	yes	1	198	m	m	6	66
1	18	male	Mouth\mf_happy_up_no_mouth.jpg	mf	happy	yes	no	0	440	z	m	7	67
1	18	male	Mouth\jj_happy_up_no_mouth.jpg	jj	happy	yes	no	1	257	z	z	6	66
1	18	male	Mouth\pf_fear_jumbled_mouth.jpg	pf	fear	no	yes	1	201	m	m	7	67
1	18	male	Mouth\pe_fear_jumbled_no_mouth.jpg	pe	fear	no	no	1	308	z	z	6	66
1	18	male	Mouth\pe_happy_up_no_mouth.jpg	pe	happy	yes	no	0	194	z	m	7	67
1	18	male	Mouth\mf_fear_up_no_mouth.jpg	mf	fear	yes	no	0	156	z	m	6	66
1	18	male	Mouth\wf_happy_up_no_mouth.jpg	wf	happy	yes	no	1	201	z	z	7	67
1	18	male	Mouth\sw_fear_jumbled_no_mouth.jpg	sw	fear	no	no	1	219	z	z	6	66
1	18	male	Mouth\pf_happy_jumbled_no_mouth.jpg	pf	happy	no	no	0	157	z	m	6	66
1	18	male	Mouth\cc_fear_up_mouth.jpg	cc	fear	yes	yes	0	185	m	z	7	67
1	18	male	Mouth\r_fear_jumbled_mouth.jpg	r_	fear	no	yes	1	269	m	m	7	67
1	18	male	Mouth\sw_happy_up_mouth.jpg	sw	happy	yes	yes	0	339	m	z	7	67
1	18	male	Mouth\cc_fear_up_no_mouth.jpg	cc	fear	yes	no	1	297	z	z	7	67
1	18	male	Mouth\jj_happy_jumbled_mouth.jpg	jj	happy	no	yes	1	207	m	m	6	66
1	18	male	Mouth\r_happy_jumbled_mouth.jpg	r_	happy	no	yes	1	210	m	m	7	67
1	18	male	Mouth\mo_fear_up_no_mouth.jpg	mo	fear	yes	no	1	219	z	z	7	67
1	18	male	Mouth\em_fear_jumbled_mouth.jpg	em	fear	no	yes	1	125	m	m	6	66
1	18	male	Mouth\em_fear_up_no_mouth.jpg	em	fear	yes	no	0	98	z	m	7	67
1	18	male	Mouth\pf_happy_jumbled_mouth.jpg	pf	happy	no	yes	0	233	m	z	7	67
1	18	male	Mouth\pf_happy_up_no_mouth.jpg	pf	happy	yes	no	1	362	z	z	7	67
1	18	male	Mouth\wf_fear_jumbled_no_mouth.jpg	wf	fear	no	no	0	174	z	m	7	67
1	18	male	Mouth\mo_happy_jumbled_mouth.jpg	mo	happy	no	yes	1	178	m	m	7	67
1	18	male	Mouth\pe_happy_jumbled_mouth.jpg	pe	happy	no	yes	1	221	m	m	7	67
1	18	male	Mouth\mo_fear_jumbled_mouth.jpg	mo	fear	no	yes	1	190	m	m	7	67
1	18	male	Mouth\pf_fear_jumbled_no_mouth.jpg	pf	fear	no	no	1	274	z	z	7	67
1	18	male	Mouth\wf_happy_jumbled_mouth.jpg	wf	happy	no	yes	1	185	m	m	7	67
1	18	male	Mouth\em_happy_up_mouth.jpg	em	happy	yes	yes	0	437	m	z	7	67
1	18	male	Mouth\jj_fear_up_mouth.jpg	jj	fear	yes	yes	1	326	m	m	7	67
1	18	male	Mouth\sw_happy_jumbled_mouth.jpg	sw	happy	no	yes	1	235	m	m	6	66
1	18	male	Mouth\pe_fear_up_mouth.jpg	pe	fear	yes	yes	1	284	m	m	6	66
1	18	male	Mouth\jj_happy_up_mouth.jpg	jj	happy	yes	yes	1	307	m	m	7	67
1	18	male	Mouth\pf_fear_up_no_mouth.jpg	pf	fear	yes	no	1	250	z	z	7	67
1	18	male	Mouth\mf_happy_jumbled_no_mouth.jpg	mf	happy	no	no	1	545	z	z	7	67
1	18	male	Mouth\cc_happy_up_no_mouth.jpg	cc	happy	yes	no	1	517	z	z	6	66
1	18	male	Mouth\sw_fear_up_mouth.jpg	sw	fear	yes	yes	1	275	m	m	6	66
1	18	male	Mouth\wf_fear_up_no_mouth.jpg	wf	fear	yes	no	1	306	z	z	7	67
1	18	male	Mouth\r_happy_jumbled_no_mouth.jpg	r_	happy	no	no	0	217	z	m	7	67
1	18	male	Mouth\mo_happy_up_no_mouth.jpg	mo	happy	yes	no	1	275	z	z	7	67
1	18	male	Mouth\pf_fear_up_mouth.jpg	pf	fear	yes	yes	1	154	m	m	7	67
1	18	male	Mouth\mo_happy_up_mouth.jpg	mo	happy	yes	yes	1	302	m	m	7	67
1	18	male	Mouth\jj_fear_jumbled_no_mouth.jpg	jj	fear	no	no	0	245	z	m	7	67
1	18	male	Mouth\em_happy_up_no_mouth.jpg	em	happy	yes	no	1	704	z	z	7	67
1	18	male	Mouth\pe_happy_up_no_mouth.jpg	pe	happy	yes	no	1	343	z	z	6	66
1	18	male	Mouth\mo_happy_jumbled_no_mouth.jpg	mo	happy	no	no	0	188	z	m	7	67
1	18	male	Mouth\cc_happy_jumbled_no_mouth.jpg	cc	happy	no	no	0	295	z	m	7	67
1	18	male	Mouth\pe_fear_jumbled_no_mouth.jpg	pe	fear	no	no	0	237	z	m	7	67
1	18	male	Mouth\wf_happy_jumbled_mouth.jpg	wf	happy	no	yes	1	318	m	m	7	67
1	18	male	Mouth\sw_fear_up_mouth.jpg	sw	fear	yes	yes	0	363	m	z	7	67
1	18	male	Mouth\pe_happy_jumbled_mouth.jpg	pe	happy	no	yes	1	375	m	m	6	66
1	18	male	Mouth\r_happy_jumbled_mouth.jpg	r_	happy	no	yes	0	362	m	z	7	67
1	18	male	Mouth\wf_fear_up_mouth.jpg	wf	fear	yes	yes	1	414	m	m	7	67
1	18	male	Mouth\mf_happy_jumbled_mouth.jpg	mf	happy	no	yes	0	456	m	z	6	66
1	18	male	Mouth\mf_fear_up_no_mouth.jpg	mf	fear	yes	no	1	552	z	z	6	66
1	18	male	Mouth\mo_happy_up_no_mouth.jpg	mo	happy	yes	no	1	461	z	z	7	67
1	18	male	Mouth\em_fear_up_mouth.jpg	em	fear	yes	yes	1	669	m	m	7	67
1	18	male	Mouth\jj_fear_jumbled_mouth.jpg	jj	fear	no	yes	1	445	m	m	7	67
1	18	male	Mouth\pe_happy_jumbled_no_mouth.jpg	pe	happy	no	no	1	397	z	z	6	66
1	18	male	Mouth\r_fear_up_no_mouth.jpg	r_	fear	yes	no	1	528	z	z	7	67
1	18	male	Mouth\wf_happy_jumbled_no_mouth.jpg	wf	happy	no	no	0	125	z	m	6	66
1	18	male	Mouth\r_fear_up_mouth.jpg	r_	fear	yes	yes	1	274	m	m	6	66
1	18	male	Mouth\mf_fear_jumbled_no_mouth.jpg	mf	fear	no	no	0	258	z	m	6	66
1	18	male	Mouth\em_fear_jumbled_mouth.jpg	em	fear	no	yes	0	370	m	z	7	67
1	18	male	Mouth\pf_fear_up_no_mouth.jpg	pf	fear	yes	no	0	230	z	m	7	67
1	18	male	Mouth\wf_fear_up_no_mouth.jpg	wf	fear	yes	no	0	287	z	m	7	67
1	18	male	Mouth\em_happy_up_mouth.jpg	em	happy	yes	yes	1	527	m	m	7	67
1	18	male	Mouth\mo_happy_jumbled_mouth.jpg	mo	happy	no	yes	1	260	m	m	7	67
1	18	male	Mouth\jj_fear_jumbled_no_mouth.jpg	jj	fear	no	no	0	339	z	m	7	67
1	18	male	Mouth\pe_fear_up_no_mouth.jpg	pe	fear	yes	no	1	304	z	z	6	66
1	18	male	Mouth\mf_fear_jumbled_mouth.jpg	mf	fear	no	yes	1	238	m	m	7	67
1	18	male	Mouth\jj_happy_up_mouth.jpg	jj	happy	yes	yes	1	231	m	m	6	66
1	18	male	Mouth\cc_happy_up_no_mouth.jpg	cc	happy	yes	no	0	336	z	m	6	66
1	18	male	Mouth\jj_happy_jumbled_no_mouth.jpg	jj	happy	no	no	1	245	z	z	6	66
1	18	male	Mouth\pf_fear_up_mouth.jpg	pf	fear	yes	yes	1	230	m	m	7	67
1	18	male	Mouth\mo_fear_jumbled_no_mouth.jpg	mo	fear	no	no	0	183	z	m	7	67
1	18	male	Mouth\pe_happy_up_mouth.jpg	pe	happy	yes	yes	1	154	m	m	6	66
1	18	male	Mouth\wf_fear_jumbled_mouth.jpg	wf	fear	no	yes	1	150	m	m	7	67
1	18	male	Mouth\jj_fear_up_mouth.jpg	jj	fear	yes	yes	1	223	m	m	6	66
1	18	male	Mouth\pf_happy_jumbled_mouth.jpg	pf	happy	no	yes	0	297	m	z	6	66
1	18	male	Mouth\em_fear_jumbled_no_mouth.jpg	em	fear	no	no	0	103	z	m	7	67
1	18	male	Mouth\sw_happy_up_no_mouth.jpg	sw	happy	yes	no	0	351	z	m	7	67
1	18	male	Mouth\mf_fear_up_mouth.jpg	mf	fear	yes	yes	0	371	m	z	7	67
1	18	male	Mouth\jj_happy_up_no_mouth.jpg	jj	happy	yes	no	1	262	z	z	7	67
1	18	male	Mouth\r_happy_jumbled_no_mouth.jpg	r_	happy	no	no	0	214	z	m	7	67
1	18	male	Mouth\sw_happy_jumbled_no_mouth.jpg	sw	happy	no	no	0	272	z	m	6	66
1	18	male	Mouth\jj_happy_jumbled_mouth.jpg	jj	happy	no	yes	1	256	m	m	6	66
1	18	male	Mouth\cc_fear_jumbled_no_mouth.jpg	cc	fear	no	no	1	408	z	z	7	67
1	18	male	Mouth\mo_fear_up_mouth.jpg	mo	fear	yes	yes	1	386	m	m	6	66
1	18	male	Mouth\wf_happy_up_no_mouth.jpg	wf	happy	yes	no	1	277	z	z	6	66
1	18	male	Mouth\mf_happy_up_mouth.jpg	mf	happy	yes	yes	1	724	m	m	7	67
1	18	male	Mouth\em_fear_up_no_mouth.jpg	em	fear	yes	no	1	434	z	z	7	67
1	18	male	Mouth\mf_happy_up_no_mouth.jpg	mf	happy	yes	no	1	314	z	z	7	67
1	18	male	Mouth\sw_happy_up_mouth.jpg	sw	happy	yes	yes	1	320	m	m	6	66
1	18	male	Mouth\mo_fear_jumbled_mouth.jpg	mo	fear	no	yes	1	294	m	m	6	66
1	18	male	Mouth\pe_fear_up_mouth.jpg	pe	fear	yes	yes	1	252	m	m	7	67
1	18	male	Mouth\pf_fear_jumbled_mouth.jpg	pf	fear	no	yes	1	285	m	m	6	66
1	18	male	Mouth\jj_fear_up_no_mouth.jpg	jj	fear	yes	no	1	492	z	z	6	66
1	18	male	Mouth\sw_fear_up_no_mouth.jpg	sw	fear	yes	no	1	323	z	z	7	67
1	18	male	Mouth\r_happy_up_mouth.jpg	r_	happy	yes	yes	1	273	m	m	7	67
1	18	male	Mouth\cc_fear_up_mouth.jpg	cc	fear	yes	yes	1	216	m	m	7	67
1	18	male	Mouth\sw_fear_jumbled_no_mouth.jpg	sw	fear	no	no	0	250	z	m	6	66
1	18	male	Mouth\pf_happy_up_mouth.jpg	pf	happy	yes	yes	0	171	m	z	7	67
1	18	male	Mouth\sw_happy_jumbled_mouth.jpg	sw	happy	no	yes	1	255	m	m	7	67
1	18	male	Mouth\mo_fear_up_no_mouth.jpg	mo	fear	yes	no	0	159	z	m	6	66
1	18	male	Mouth\pf_fear_jumbled_no_mouth.jpg	pf	fear	no	no	1	291	z	z	7	67
1	18	male	Mouth\cc_happy_up_mouth.jpg	cc	happy	yes	yes	0	290	m	z	6	66
1	18	male	Mouth\wf_happy_up_mouth.jpg	wf	happy	yes	yes	1	480	m	m	6	66
1	18	male	Mouth\pf_happy_up_no_mouth.jpg	pf	happy	yes	no	0	191	z	m	7	67
1	18	male	Mouth\em_happy_jumbled_no_mouth.jpg	em	happy	no	no	0	138	z	m	7	67
1	18	male	Mouth\r_happy_up_no_mouth.jpg	r_	happy	yes	no	0	215	z	m	6	66
1	18	male	Mouth\r_fear_jumbled_mouth.jpg	r_	fear	no	yes	1	208	m	m	6	66
1	18	male	Mouth\mo_happy_up_mouth.jpg	mo	happy	yes	yes	1	378	m	m	6	66
1	18	male	Mouth\pe_fear_jumbled_mouth.jpg	pe	fear	no	yes	0	117	m	z	6	66
1	18	male	Mouth\cc_happy_jumbled_mouth.jpg	cc	happy	no	yes	1	211	m	m	6	66
1	18	male	Mouth\r_fear_jumbled_no_mouth.jpg	r_	fear	no	no	0	237	z	m	7	67
1	18	male	Mouth\em_happy_jumbled_mouth.jpg	em	happy	no	yes	1	214	m	m	7	67
1	18	male	Mouth\mf_happy_jumbled_no_mouth.jpg	mf	happy	no	no	1	295	z	z	6	66
1	18	male	Mouth\wf_fear_jumbled_no_mouth.jpg	wf	fear	no	no	0	278	z	m	7	67
1	18	male	Mouth\cc_fear_jumbled_mouth.jpg	cc	fear	no	yes	1	301	m	m	7	67
1	18	male	Mouth\cc_fear_up_no_mouth.jpg	cc	fear	yes	no	0	323	z	m	6	66
1	18	male	Mouth\sw_fear_jumbled_mouth.jpg	sw	fear	no	yes	1	297	m	m	6	66
1	18	male	Mouth\pf_happy_jumbled_no_mouth.jpg	pf	happy	no	no	0	280	z	m	7	67
1	18	male	Mouth\r_fear_jumbled_no_mouth.jpg	r_	fear	no	no	0	887	z	m	6	66
1	18	male	Mouth\sw_happy_jumbled_mouth.jpg	sw	happy	no	yes	1	270	m	m	7	67
1	18	male	Mouth\pe_happy_jumbled_no_mouth.jpg	pe	happy	no	no	1	382	z	z	7	67
1	18	male	Mouth\jj_fear_jumbled_mouth.jpg	jj	fear	no	yes	1	265	m	m	7	67
1	18	male	Mouth\wf_happy_up_mouth.jpg	wf	happy	yes	yes	0	321	m	z	7	67
1	18	male	Mouth\pe_fear_jumbled_mouth.jpg	pe	fear	no	yes	1	167	m	m	6	66
1	18	male	Mouth\r_happy_jumbled_mouth.jpg	r_	happy	no	yes	1	179	m	m	6	66
1	18	male	Mouth\pf_happy_jumbled_no_mouth.jpg	pf	happy	no	no	0	246	z	m	6	66
1	18	male	Mouth\jj_happy_jumbled_mouth.jpg	jj	happy	no	yes	1	183	m	m	7	67
1	18	male	Mouth\mo_happy_up_mouth.jpg	mo	happy	yes	yes	1	250	m	m	7	67
1	18	male	Mouth\cc_fear_up_no_mouth.jpg	cc	fear	yes	no	1	298	z	z	6	66
1	18	male	Mouth\em_happy_up_mouth.jpg	em	happy	yes	yes	0	401	m	z	7	67
1	18	male	Mouth\pf_happy_jumbled_mouth.jpg	pf	happy	no	yes	1	251	m	m	6	66
1	18	male	Mouth\sw_happy_up_no_mouth.jpg	sw	happy	yes	no	1	332	z	z	7	67
1	18	male	Mouth\mo_happy_jumbled_no_mouth.jpg	mo	happy	no	no	0	168	z	m	6	66
1	18	male	Mouth\mo_happy_jumbled_mouth.jpg	mo	happy	no	yes	1	164	m	m	7	67
1	18	male	Mouth\jj_fear_up_no_mouth.jpg	jj	fear	yes	no	1	207	z	z	7	67
1	18	male	Mouth\pf_happy_up_no_mouth.jpg	pf	happy	yes	no	1	266	z	z	6	66
1	18	male	Mouth\mf_fear_up_mouth.jpg	mf	fear	yes	yes	1	121	m	m	6	66
1	18	male	Mouth\cc_happy_jumbled_mouth.jpg	cc	happy	no	yes	1	119	m	m	6	66
1	18	male	Mouth\wf_fear_up_no_mouth.jpg	wf	fear	yes	no	0	269	z	m	7	67
1	18	male	Mouth\em_happy_jumbled_mouth.jpg	em	happy	no	yes	1	157	m	m	7	67
1	18	male	Mouth\sw_fear_up_no_mouth.jpg	sw	fear	yes	no	1	201	z	z	6	66
1	18	male	Mouth\mf_fear_jumbled_no_mouth.jpg	mf	fear	no	no	0	115	z	m	7	67
1	18	male	Mouth\r_fear_up_mouth.jpg	r_	fear	yes	yes	1	153	m	m	7	67
1	18	male	Mouth\sw_fear_jumbled_no_mouth.jpg	sw	fear	no	no	1	229	z	z	6	66
1	18	male	Mouth\r_happy_jumbled_no_mouth.jpg	r_	happy	no	no	0	142	z	m	6	66
1	18	male	Mouth\jj_happy_jumbled_no_mouth.jpg	jj	happy	no	no	0	131	z	m	7	67
1	18	male	Mouth\cc_fear_up_mouth.jpg	cc	fear	yes	yes	1	176	m	m	7	67
1	18	male	Mouth\mf_happy_jumbled_mouth.jpg	mf	happy	no	yes	1	146	m	m	6	66
1	18	male	Mouth\cc_happy_up_mouth.jpg	cc	happy	yes	yes	0	255	m	z	7	67
1	18	male	Mouth\mo_fear_up_no_mouth.jpg	mo	fear	yes	no	0	567	z	m	6	66
1	18	male	Mouth\mo_happy_up_no_mouth.jpg	mo	happy	yes	no	1	331	z	z	6	66
1	18	male	Mouth\cc_fear_jumbled_mouth.jpg	cc	fear	no	yes	1	136	m	m	7	67
1	18	male	Mouth\wf_happy_jumbled_no_mouth.jpg	wf	happy	no	no	0	117	z	m	7	67
1	18	male	Mouth\jj_happy_up_no_mouth.jpg	jj	happy	yes	no	1	354	z	z	6	66
1	18	male	Mouth\pf_fear_jumbled_mouth.jpg	pf	fear	no	yes	1	135	m	m	7	67
1	18	male	Mouth\wf_fear_up_mouth.jpg	wf	fear	yes	yes	0	252	m	z	7	67
1	18	male	Mouth\wf_fear_jumbled_no_mouth.jpg	wf	fear	no	no	1	444	z	z	7	67
1	18	male	Mouth\wf_happy_jumbled_mouth.jpg	wf	happy	no	yes	1	349	m	m	7	67
1	18	male	Mouth\mf_happy_up_no_mouth.jpg	mf	happy	yes	no	0	329	z	m	7	67
1	18	male	Mouth\pf_fear_up_mouth.jpg	pf	fear	yes	yes	1	198	m	m	6	66
1	18	male	Mouth\em_happy_up_no_mouth.jpg	em	happy	yes	no	1	224	z	z	7	67
1	18	male	Mouth\r_happy_up_mouth.jpg	r_	happy	yes	yes	0	290	m	z	6	66
1	18	male	Mouth\pe_fear_jumbled_no_mouth.jpg	pe	fear	no	no	0	785	z	m	7	67
1	18	male	Mouth\pe_happy_up_mouth.jpg	pe	happy	yes	yes	1	293	m	m	7	67
1	18	male	Mouth\sw_fear_jumbled_mouth.jpg	sw	fear	no	yes	1	251	m	m	7	67
1	18	male	Mouth\cc_fear_jumbled_no_mouth.jpg	cc	fear	no	no	0	132	z	m	7	67
1	18	male	Mouth\pe_fear_up_no_mouth.jpg	pe	fear	yes	no	1	265	z	z	7	67
1	18	male	Mouth\em_happy_jumbled_no_mouth.jpg	em	happy	no	no	0	297	z	m	7	67
1	18	male	Mouth\em_fear_up_no_mouth.jpg	em	fear	yes	no	1	1263	z	z	6	66
1	18	male	Mouth\mo_fear_jumbled_mouth.jpg	mo	fear	no	yes	1	223	m	m	7	67
1	18	male	Mouth\pe_happy_jumbled_mouth.jpg	pe	happy	no	yes	1	257	m	m	7	67
1	18	male	Mouth\pe_fear_up_mouth.jpg	pe	fear	yes	yes	1	338	m	m	7	67
1	18	male	Mouth\mo_fear_up_mouth.jpg	mo	fear	yes	yes	0	230	m	z	6	66
1	18	male	Mouth\mf_happy_up_mouth.jpg	mf	happy	yes	yes	0	463	m	z	6	66
1	18	male	Mouth\pf_happy_up_mouth.jpg	pf	happy	yes	yes	0	431	m	z	6	66
1	18	male	Mouth\cc_happy_up_no_mouth.jpg	cc	happy	yes	no	1	320	z	z	6	66
1	18	male	Mouth\em_fear_jumbled_mouth.jpg	em	fear	no	yes	1	214	m	m	6	66
1	18	male	Mouth\pe_happy_up_no_mouth.jpg	pe	happy	yes	no	1	384	z	z	7	67
1	18	male	Mouth\jj_fear_jumbled_no_mouth.jpg	jj	fear	no	no	0	227	z	m	6	66
1	18	male	Mouth\pf_fear_jumbled_no_mouth.jpg	pf	fear	no	no	1	444	z	z	7	67
1	18	male	Mouth\cc_happy_jumbled_no_mouth.jpg	cc	happy	no	no	1	453	z	z	7	67
1	18	male	Mouth\em_fear_jumbled_no_mouth.jpg	em	fear	no	no	0	181	z	m	7	67
1	18	male	Mouth\sw_happy_jumbled_no_mouth.jpg	sw	happy	no	no	0	249	z	m	7	67
1	18	male	Mouth\r_fear_up_no_mouth.jpg	r_	fear	yes	no	0	233	z	m	6	66
1	18	male	Mouth\mf_fear_jumbled_mouth.jpg	mf	fear	no	yes	1	134	m	m	7	67
1	18	male	Mouth\pf_fear_up_no_mouth.jpg	pf	fear	yes	no	0	379	z	m	7	67
1	18	male	Mouth\wf_happy_up_no_mouth.jpg	wf	happy	yes	no	1	358	z	z	6	66
1	18	male	Mouth\mf_happy_jumbled_no_mouth.jpg	mf	happy	no	no	1	338	z	z	6	66
1	18	male	Mouth\em_fear_up_mouth.jpg	em	fear	yes	yes	0	271	m	z	6	66
1	18	male	Mouth\r_fear_jumbled_mouth.jpg	r_	fear	no	yes	1	239	m	m	6	66
1	18	male	Mouth\jj_happy_up_mouth.jpg	jj	happy	yes	yes	1	288	m	m	6	66
1	18	male	Mouth\sw_happy_up_mouth.jpg	sw	happy	yes	yes	1	279	m	m	7	67
1	18	male	Mouth\r_happy_up_no_mouth.jpg	r_	happy	yes	no	1	325	z	z	7	67
1	18	male	Mouth\sw_fear_up_mouth.jpg	sw	fear	yes	yes	1	347	m	m	7	67
1	18	male	Mouth\mo_fear_jumbled_no_mouth.jpg	mo	fear	no	no	1	287	z	z	6	66
1	18	male	Mouth\mf_fear_up_no_mouth.jpg	mf	fear	yes	no	0	142	z	m	7	67
1	18	male	Mouth\jj_fear_up_mouth.jpg	jj	fear	yes	yes	1	258	m	m	6	66
1	18	male	Mouth\wf_fear_jumbled_mouth.jpg	wf	fear	no	yes	0	226	m	z	6	66
1	18	male	Mouth\em_fear_jumbled_no_mouth.jpg	em	fear	no	no	0	316	z	m	7	67
1	18	male	Mouth\r_happy_jumbled_mouth.jpg	r_	happy	no	yes	1	185	m	m	7	67
1	18	male	Mouth\mf_happy_jumbled_no_mouth.jpg	mf	happy	no	no	1	236	z	z	6	66
1	18	male	Mouth\sw_fear_up_no_mouth.jpg	sw	fear	yes	no	1	269	z	z	6	66
1	18	male	Mouth\pf_fear_up_mouth.jpg	pf	fear	yes	yes	1	285	m	m	6	66
1	18	male	Mouth\sw_happy_jumbled_mouth.jpg	sw	happy	no	yes	1	260	m	m	6	66
1	18	male	Mouth\mo_fear_up_mouth.jpg	mo	fear	yes	yes	1	436	m	m	6	66
1	18	male	Mouth\mf_fear_up_mouth.jpg	mf	fear	yes	yes	0	308	m	z	7	67
1	18	male	Mouth\em_happy_jumbled_no_mouth.jpg	em	happy	no	no	0	442	z	m	7	67
1	18	male	Mouth\jj_happy_jumbled_mouth.jpg	jj	happy	no	yes	1	411	m	m	6	66
1	18	male	Mouth\em_happy_up_no_mouth.jpg	em	happy	yes	no	1	245	z	z	7	67
1	18	male	Mouth\pe_happy_jumbled_no_mouth.jpg	pe	happy	no	no	1	237	z	z	7	67
1	18	male	Mouth\wf_happy_up_mouth.jpg	wf	happy	yes	yes	1	294	m	m	7	67
1	18	male	Mouth\pe_fear_up_no_mouth.jpg	pe	fear	yes	no	1	301	z	z	6	66
1	18	male	Mouth\jj_fear_up_no_mouth.jpg	jj	fear	yes	no	1	211	z	z	7	67
1	18	male	Mouth\wf_happy_jumbled_no_mouth.jpg	wf	happy	no	no	1	253	z	z	7	67
1	18	male	Mouth\jj_happy_jumbled_no_mouth.jpg	jj	happy	no	no	0	317	z	m	7	67
1	18	male	Mouth\r_happy_jumbled_no_mouth.jpg	r_	happy	no	no	0	875	z	m	7	67
1	18	male	Mouth\pe_happy_up_mouth.jpg	pe	happy	yes	yes	1	266	m	m	6	66
1	18	male	Mouth\mo_fear_jumbled_no_mouth.jpg	mo	fear	no	no	1	330	z	z	7	67
1	18	male	Mouth\mo_happy_jumbled_mouth.jpg	mo	happy	no	yes	1	711	m	m	6	66
1	18	male	Mouth\mo_happy_jumbled_no_mouth.jpg	mo	happy	no	no	0	253	z	m	6	66
1	18	male	Mouth\pf_happy_up_no_mouth.jpg	pf	happy	yes	no	1	318	z	z	7	67
1	18	male	Mouth\sw_happy_jumbled_no_mouth.jpg	sw	happy	no	no	1	299	z	z	7	67
1	18	male	Mouth\cc_fear_up_mouth.jpg	cc	fear	yes	yes	1	362	m	m	6	66
1	18	male	Mouth\pe_fear_jumbled_mouth.jpg	pe	fear	no	yes	0	606	m	z	7	67
1	18	male	Mouth\mf_fear_jumbled_no_mouth.jpg	mf	fear	no	no	0	368	z	m	7	67
1	18	male	Mouth\em_fear_jumbled_mouth.jpg	em	fear	no	yes	1	308	m	m	7	67
1	18	male	Mouth\cc_happy_up_mouth.jpg	cc	happy	yes	yes	0	267	m	z	7	67
1	18	male	Mouth\mf_fear_up_no_mouth.jpg	mf	fear	yes	no	0	210	z	m	6	66
1	18	male	Mouth\cc_fear_up_no_mouth.jpg	cc	fear	yes	no	1	508	z	z	7	67
1	18	male	Mouth\cc_happy_jumbled_no_mouth.jpg	cc	happy	no	no	0	178	z	m	7	67
1	18	male	Mouth\r_happy_up_mouth.jpg	r_	happy	yes	yes	1	254	m	m	7	67
1	18	male	Mouth\em_happy_up_mouth.jpg	em	happy	yes	yes	1	342	m	m	6	66
1	18	male	Mouth\wf_fear_jumbled_no_mouth.jpg	wf	fear	no	no	1	195	z	z	7	67
1	18	male	Mouth\pf_fear_up_no_mouth.jpg	pf	fear	yes	no	0	268	z	m	6	66
1	18	male	Mouth\wf_fear_up_mouth.jpg	wf	fear	yes	yes	1	428	m	m	7	67
1	18	male	Mouth\sw_fear_up_mouth.jpg	sw	fear	yes	yes	1	293	m	m	6	66
1	18	male	Mouth\mf_fear_jumbled_mouth.jpg	mf	fear	no	yes	1	195	m	m	6	66
1	18	male	Mouth\r_fear_jumbled_mouth.jpg	r_	fear	no	yes	1	269	m	m	7	67
1	18	male	Mouth\jj_happy_up_no_mouth.jpg	jj	happy	yes	no	1	205	z	z	6	66
1	18	male	Mouth\r_fear_jumbled_no_mouth.jpg	r_	fear	no	no	1	328	z	z	7	67
1	18	male	Mouth\pf_fear_jumbled_mouth.jpg	pf	fear	no	yes	1	261	m	m	7	67
1	18	male	Mouth\cc_happy_up_no_mouth.jpg	cc	happy	yes	no	1	293	z	z	7	67
1	18	male	Mouth\mo_happy_up_no_mouth.jpg	mo	happy	yes	no	1	307	z	z	6	66
1	18	male	Mouth\pe_fear_up_mouth.jpg	pe	fear	yes	yes	1	194	m	m	7	67
1	18	male	Mouth\mf_happy_up_no_mouth.jpg	mf	happy	yes	no	0	236	z	m	6	66
1	18	male	Mouth\r_fear_up_no_mouth.jpg	r_	fear	yes	no	0	397	z	m	7	67
1	18	male	Mouth\mf_happy_up_mouth.jpg	mf	happy	yes	yes	1	352	m	m	6	66
1	18	male	Mouth\mf_happy_jumbled_mouth.jpg	mf	happy	no	yes	1	388	m	m	7	67
1	18	male	Mouth\pe_fear_jumbled_no_mouth.jpg	pe	fear	no	no	1	231	z	z	6	66
1	18	male	Mouth\wf_fear_up_no_mouth.jpg	wf	fear	yes	no	1	272	z	z	6	66
1	18	male	Mouth\sw_happy_up_mouth.jpg	sw	happy	yes	yes	1	248	m	m	6	66
1	18	male	Mouth\mo_fear_up_no_mouth.jpg	mo	fear	yes	no	0	376	z	m	7	67
1	18	male	Mouth\pe_happy_up_no_mouth.jpg	pe	happy	yes	no	1	348	z	z	7	67
1	18	male	Mouth\pf_happy_up_mouth.jpg	pf	happy	yes	yes	1	383	m	m	6	66
1	18	male	Mouth\wf_fear_jumbled_mouth.jpg	wf	fear	no	yes	1	234	m	m	7	67
1	18	male	Mouth\mo_happy_up_mouth.jpg	mo	happy	yes	yes	1	276	m	m	7	67
1	18	male	Mouth\r_fear_up_mouth.jpg	r_	fear	yes	yes	1	235	m	m	7	67
1	18	male	Mouth\pe_happy_jumbled_mouth.jpg	pe	happy	no	yes	0	236	m	z	6	66
1	18	male	Mouth\cc_fear_jumbled_no_mouth.jpg	cc	fear	no	no	1	341	z	z	6	66
1	18	male	Mouth\mo_fear_jumbled_mouth.jpg	mo	fear	no	yes	1	186	m	m	7	67
1	18	male	Mouth\wf_happy_up_no_mouth.jpg	wf	happy	yes	no	1	293	z	z	7	67
1	18	male	Mouth\em_happy_jumbled_mouth.jpg	em	happy	no	yes	1	180	m	m	7	67
1	18	male	Mouth\cc_fear_jumbled_mouth.jpg	cc	fear	no	yes	1	207	m	m	6	66
1	18	male	Mouth\em_fear_up_mouth.jpg	em	fear	yes	yes	0	297	m	z	7	67
1	18	male	Mouth\jj_fear_jumbled_mouth.jpg	jj	fear	no	yes	1	152	m	m	6	66
1	18	male	Mouth\pf_happy_jumbled_no_mouth.jpg	pf	happy	no	no	0	372	z	m	7	67
1	18	male	Mouth\pf_fear_jumbled_no_mouth.jpg	pf	fear	no	no	1	296	z	z	7	67
1	18	male	Mouth\jj_happy_up_mouth.jpg	jj	happy	yes	yes	1	119	m	m	7	67
1	18	male	Mouth\jj_fear_jumbled_no_mouth.jpg	jj	fear	no	no	0	69	z	m	7	67
1	18	male	Mouth\sw_fear_jumbled_no_mouth.jpg	sw	fear	no	no	0	348	z	m	7	67
1	18	male	Mouth\sw_fear_jumbled_mouth.jpg	sw	fear	no	yes	1	257	m	m	6	66
1	18	male	Mouth\em_fear_up_no_mouth.jpg	em	fear	yes	no	1	257	z	z	7	67
1	18	male	Mouth\cc_happy_jumbled_mouth.jpg	cc	happy	no	yes	1	258	m	m	7	67
1	18	male	Mouth\r_happy_up_no_mouth.jpg	r_	happy	yes	no	0	466	z	m	7	67
1	18	male	Mouth\jj_fear_up_mouth.jpg	jj	fear	yes	yes	1	345	m	m	7	67
1	18	male	Mouth\wf_happy_jumbled_mouth.jpg	wf	happy	no	yes	0	422	m	z	7	67
1	18	male	Mouth\sw_happy_up_no_mouth.jpg	sw	happy	yes	no	1	328	z	z	7	67
1	18	male	Mouth\pf_happy_jumbled_mouth.jpg	pf	happy	no	yes	1	261	m	m	7	67
2	18	female	Mouth\mf_fear_jumbled_mouth.jpg	mf	fear	no	yes	1	722	m	m	7	67
2	18	female	Mouth\em_happy_up_mouth.jpg	em	happy	yes	yes	1	380	m	m	7	67
2	18	female	Mouth\wf_fear_jumbled_mouth.jpg	wf	fear	no	yes	0	459	m	z	7	67
2	18	female	Mouth\mo_happy_up_no_mouth.jpg	mo	happy	yes	no	1	447	z	z	7	67
2	18	female	Mouth\sw_happy_up_mouth.jpg	sw	happy	yes	yes	1	371	m	m	7	67
2	18	female	Mouth\mo_fear_up_mouth.jpg	mo	fear	yes	yes	1	458	m	m	7	67
2	18	female	Mouth\wf_happy_up_mouth.jpg	wf	happy	yes	yes	1	446	m	m	7	67
2	18	female	Mouth\mf_fear_up_mouth.jpg	mf	fear	yes	yes	0	395	m	z	6	66
2	18	female	Mouth\pe_fear_up_mouth.jpg	pe	fear	yes	yes	1	337	m	m	7	67
2	18	female	Mouth\mf_happy_up_no_mouth.jpg	mf	happy	yes	no	0	346	z	m	7	67
2	18	female	Mouth\cc_fear_jumbled_no_mouth.jpg	cc	fear	no	no	0	473	z	m	7	67
2	18	female	Mouth\mf_happy_jumbled_no_mouth.jpg	mf	happy	no	no	1	363	z	z	7	67
2	18	female	Mouth\cc_fear_jumbled_mouth.jpg	cc	fear	no	yes	1	447	m	m	7	67
2	18	female	Mouth\cc_happy_up_mouth.jpg	cc	happy	yes	yes	1	559	m	m	7	67
2	18	female	Mouth\pe_happy_jumbled_no_mouth.jpg	pe	happy	no	no	0	370	z	m	7	67
2	18	female	Mouth\sw_fear_jumbled_no_mouth.jpg	sw	fear	no	no	1	269	z	z	6	66
2	18	female	Mouth\em_fear_up_mouth.jpg	em	fear	yes	yes	1	365	m	m	6	66
2	18	female	Mouth\pe_fear_jumbled_no_mouth.jpg	pe	fear	no	no	1	304	z	z	6	66
2	18	female	Mouth\pf_happy_jumbled_mouth.jpg	pf	happy	no	yes	0	413	m	z	6	66
2	18	female	Mouth\r_happy_up_no_mouth.jpg	r_	happy	yes	no	1	278	z	z	7	67
2	18	female	Mouth\wf_fear_jumbled_no_mouth.jpg	wf	fear	no	no	0	323	z	m	7	67
2	18	female	Mouth\jj_fear_up_no_mouth.jpg	jj	fear	yes	no	1	304	z	z	6	66
2	18	female	Mouth\sw_happy_up_no_mouth.jpg	sw	happy	yes	no	1	318	z	z	6	66
2	18	female	Mouth\wf_happy_jumbled_mouth.jpg	wf	happy	no	yes	1	242	m	m	7	67
2	18	female	Mouth\mf_happy_up_mouth.jpg	mf	happy	yes	yes	0	177	m	z	6	66
2	18	female	Mouth\r_fear_up_mouth.jpg	r_	fear	yes	yes	1	219	m	m	7	67
2	18	female	Mouth\em_happy_jumbled_no_mouth.jpg	em	happy	no	no	0	156	z	m	6	66
2	18	female	Mouth\pe_happy_up_mouth.jpg	pe	happy	yes	yes	1	312	m	m	7	67
2	18	female	Mouth\r_happy_jumbled_no_mouth.jpg	r_	happy	no	no	1	238	z	z	7	67
2	18	female	Mouth\cc_happy_jumbled_no_mouth.jpg	cc	happy	no	no	1	566	z	z	6	66
2	18	female	Mouth\sw_fear_up_no_mouth.jpg	sw	fear	yes	no	1	258	z	z	6	66
2	18	female	Mouth\pf_happy_up_no_mouth.jpg	pf	happy	yes	no	1	234	z	z	6	66
2	18	female	Mouth\jj_happy_jumbled_no_mouth.jpg	jj	happy	no	no	1	250	z	z	7	67
2	18	female	Mouth\pf_fear_jumbled_mouth.jpg	pf	fear	no	yes	1	234	m	m	7	67
2	18	female	Mouth\r_fear_up_no_mouth.jpg	r_	fear	yes	no	0	315	z	m	7	67
2	18	female	Mouth\sw_happy_jumbled_mouth.jpg	sw	happy	no	yes	1	416	m	m	6	66
2	18	female	Mouth\r_happy_jumbled_mouth.jpg	r_	happy	no	yes	1	289	m	m	7	67
2	18	female	Mouth\pf_happy_up_mouth.jpg	pf	happy	yes	yes	0	310	m	z	6	66
2	18	female	Mouth\wf_happy_jumbled_no_mouth.jpg	wf	happy	no	no	1	348	z	z	6	66
2	18	female	Mouth\r_fear_jumbled_no_mouth.jpg	r_	fear	no	no	1	264	z	z	6	66
2	18	female	Mouth\pe_happy_up_no_mouth.jpg	pe	happy	yes	no	1	303	z	z	6	66
2	18	female	Mouth\jj_happy_up_no_mouth.jpg	jj	happy	yes	no	1	573	z	z	6	66
2	18	female	Mouth\mo_happy_jumbled_mouth.jpg	mo	happy	no	yes	1	257	m	m	6	66
2	18	female	Mouth\em_fear_jumbled_mouth.jpg	em	fear	no	yes	1	209	m	m	7	67
2	18	female	Mouth\pe_fear_up_no_mouth.jpg	pe	fear	yes	no	0	218	z	m	6	66
2	18	female	Mouth\mf_happy_jumbled_mouth.jpg	mf	happy	no	yes	1	187	m	m	6	66
2	18	female	Mouth\jj_fear_up_mouth.jpg	jj	fear	yes	yes	1	126	m	m	7	67
2	18	female	Mouth\em_fear_jumbled_no_mouth.jpg	em	fear	no	no	0	305	z	m	7	67
2	18	female	Mouth\sw_fear_up_mouth.jpg	sw	fear	yes	yes	0	231	m	z	7	67
2	18	female	Mouth\jj_happy_up_mouth.jpg	jj	happy	yes	yes	1	127	m	m	6	66
2	18	female	Mouth\jj_happy_jumbled_mouth.jpg	jj	happy	no	yes	1	188	m	m	7	67
2	18	female	Mouth\cc_fear_up_no_mouth.jpg	cc	fear	yes	no	0	190	z	m	6	66
2	18	female	Mouth\pe_fear_jumbled_mouth.jpg	pe	fear	no	yes	1	201	m	m	6	66
2	18	female	Mouth\mo_fear_jumbled_mouth.jpg	mo	fear	no	yes	0	532	m	z	7	67
2	18	female	Mouth\em_fear_up_no_mouth.jpg	em	fear	yes	no	1	392	z	z	6	66
2	18	female	Mouth\r_happy_up_mouth.jpg	r_	happy	yes	yes	1	171	m	m	7	67
2	18	female	Mouth\mo_happy_up_mouth.jpg	mo	happy	yes	yes	1	111	m	m	7	67
2	18	female	Mouth\em_happy_up_no_mouth.jpg	em	happy	yes	no	0	116	z	m	7	67
2	18	female	Mouth\mf_fear_up_no_mouth.jpg	mf	fear	yes	no	0	88	z	m	7	67
2	18	female	Mouth\r_fear_jumbled_mouth.jpg	r_	fear	no	yes	1	142	m	m	6	66
2	18	female	Mouth\mo_happy_jumbled_no_mouth.jpg	mo	happy	no	no	0	227	z	m	7	67
2	18	female	Mouth\jj_fear_jumbled_no_mouth.jpg	jj	fear	no	no	0	467	z	m	6	66
2	18	female	Mouth\cc_fear_up_mouth.jpg	cc	fear	yes	yes	1	570	m	m	7	67
2	18	female	Mouth\cc_happy_jumbled_mouth.jpg	cc	happy	no	yes	1	574	m	m	7	67
2	18	female	Mouth\cc_happy_up_no_mouth.jpg	cc	happy	yes	no	1	473	z	z	6	66
2	18	female	Mouth\sw_happy_jumbled_no_mouth.jpg	sw	happy	no	no	1	400	z	z	7	67
2	18	female	Mouth\wf_fear_up_mouth.jpg	wf	fear	yes	yes	1	362	m	m	6	66
2	18	female	Mouth\sw_fear_jumbled_mouth.jpg	sw	fear	no	yes	1	405	m	m	7	67
2	18	female	Mouth\wf_happy_up_no_mouth.jpg	wf	happy	yes	no	1	455	z	z	7	67
2	18	female	Mouth\pf_fear_jumbled_no_mouth.jpg	pf	fear	no	no	1	327	z	z	7	67
2	18	female	Mouth\mo_fear_up_no_mouth.jpg	mo	fear	yes	no	1	299	z	z	6	66
2	18	female	Mouth\pf_fear_up_mouth.jpg	pf	fear	yes	yes	1	384	m	m	7	67
2	18	female	Mouth\mf_fear_jumbled_no_mouth.jpg	mf	fear	no	no	1	411	z	z	7	67
2	18	female	Mouth\pf_happy_jumbled_no_mouth.jpg	pf	happy	no	no	0	403	z	m	7	67
2	18	female	Mouth\pf_fear_up_no_mouth.jpg	pf	fear	yes	no	1	477	z	z	7	67
2	18	female	Mouth\jj_fear_jumbled_mouth.jpg	jj	fear	no	yes	1	323	m	m	7	67
2	18	female	Mouth\em_happy_jumbled_mouth.jpg	em	happy	no	yes	1	287	m	m	7	67
2	18	female	Mouth\wf_fear_up_no_mouth.jpg	wf	fear	yes	no	0	429	z	m	7	67
2	18	female	Mouth\mo_fear_jumbled_no_mouth.jpg	mo	fear	no	no	0	246	z	m	7	67
2	18	female	Mouth\pe_happy_jumbled_mouth.jpg	pe	happy	no	yes	1	302	m	m	7	67
2	18	female	Mouth\cc_happy_up_no_mouth.jpg	cc	happy	yes	no	0	342	z	m	7	67
2	18	female	Mouth\jj_fear_up_mouth.jpg	jj	fear	yes	yes	1	282	m	m	6	66
2	18	female	Mouth\wf_happy_up_no_mouth.jpg	wf	happy	yes	no	0	457	z	m	7	67
2	18	female	Mouth\sw_happy_jumbled_no_mouth.jpg	sw	happy	no	no	1	393	z	z	7	67
2	18	female	Mouth\pe_happy_up_mouth.jpg	pe	happy	yes	yes	1	291	m	m	6	66
2	18	female	Mouth\mf_fear_up_mouth.jpg	mf	fear	yes	yes	0	474	m	z	7	67
2	18	female	Mouth\pf_happy_jumbled_no_mouth.jpg	pf	happy	no	no	1	368	z	z	7	67
2	18	female	Mouth\mo_fear_up_no_mouth.jpg	mo	fear	yes	no	1	324	z	z	6	66
2	18	female	Mouth\cc_fear_jumbled_no_mouth.jpg	cc	fear	no	no	1	289	z	z	7	67
2	18	female	Mouth\cc_fear_jumbled_mouth.jpg	cc	fear	no	yes	0	391	m	z	7	67
2	18	female	Mouth\wf_happy_jumbled_mouth.jpg	wf	happy	no	yes	1	503	m	m	7	67
2	18	female	Mouth\em_fear_up_mouth.jpg	em	fear	yes	yes	1	390	m	m	6	66
2	18	female	Mouth\cc_happy_up_mouth.jpg	cc	happy	yes	yes	1	432	m	m	6	66
2	18	female	Mouth\pe_fear_jumbled_no_mouth.jpg	pe	fear	no	no	0	392	z	m	7	67
2	18	female	Mouth\mo_happy_up_mouth.jpg	mo	happy	yes	yes	1	363	m	m	6	66
2	18	female	Mouth\r_happy_up_no_mouth.jpg	r_	happy	yes	no	1	382	z	z	7	67
2	18	female	Mouth\wf_happy_jumbled_no_mouth.jpg	wf	happy	no	no	1	785	z	z	7	67
2	18	female	Mouth\jj_fear_jumbled_mouth.jpg	jj	fear	no	yes	1	291	m	m	7	67
2	18	female	Mouth\pf_happy_jumbled_mouth.jpg	pf	happy	no	yes	0	417	m	z	7	67
2	18	female	Mouth\sw_happy_up_mouth.jpg	sw	happy	yes	yes	1	370	m	m	6	66
2	18	female	Mouth\pe_fear_up_mouth.jpg	pe	fear	yes	yes	1	261	m	m	6	66
2	18	female	Mouth\pf_fear_jumbled_no_mouth.jpg	pf	fear	no	no	1	300	z	z	7	67
2	18	female	Mouth\jj_happy_jumbled_mouth.jpg	jj	happy	no	yes	1	410	m	m	6	66
2	18	female	Mouth\wf_happy_up_mouth.jpg	wf	happy	yes	yes	1	251	m	m	7	67
2	18	female	Mouth\r_happy_jumbled_no_mouth.jpg	r_	happy	no	no	1	283	z	z	6	66
2	18	female	Mouth\sw_fear_jumbled_no_mouth.jpg	sw	fear	no	no	1	738	z	z	7	67
2	18	female	Mouth\wf_fear_up_no_mouth.jpg	wf	fear	yes	no	1	502	z	z	7	67
2	18	female	Mouth\mo_happy_up_no_mouth.jpg	mo	happy	yes	no	1	372	z	z	7	67
2	18	female	Mouth\mo_fear_up_mouth.jpg	mo	fear	yes	yes	1	471	m	m	7	67
2	18	female	Mouth\wf_fear_jumbled_no_mouth.jpg	wf	fear	no	no	1	309	z	z	6	66
2	18	female	Mouth\em_fear_jumbled_mouth.jpg	em	fear	no	yes	1	362	m	m	7	67
2	18	female	Mouth\mo_happy_jumbled_mouth.jpg	mo	happy	no	yes	1	278	m	m	7	67
2	18	female	Mouth\r_happy_jumbled_mouth.jpg	r_	happy	no	yes	1	260	m	m	6	66
2	18	female	Mouth\pe_happy_jumbled_mouth.jpg	pe	happy	no	yes	1	220	m	m	6	66
2	18	female	Mouth\pf_happy_up_no_mouth.jpg	pf	happy	yes	no	0	438	z	m	7	67
2	18	female	Mouth\r_fear_up_no_mouth.jpg	r_	fear	yes	no	1	359	z	z	6	66
2	18	female	Mouth\pe_happy_up_no_mouth.jpg	pe	happy	yes	no	1	210	z	z	6	66
2	18	female	Mouth\sw_happy_up_no_mouth.jpg	sw	happy	yes	no	1	339	z	z	7	67
2	18	female	Mouth\mo_fear_jumbled_no_mouth.jpg	mo	fear	no	no	0	232	z	m	7	67
2	18	female	Mouth\pe_fear_up_no_mouth.jpg	pe	fear	yes	no	1	296	z	z	7	67
2	18	female	Mouth\mf_happy_jumbled_no_mouth.jpg	mf	happy	no	no	1	190	z	z	6	66
2	18	female	Mouth\sw_fear_up_mouth.jpg	sw	fear	yes	yes	1	392	m	m	6	66
2	18	female	Mouth\mf_fear_up_no_mouth.jpg	mf	fear	yes	no	0	338	z	m	6	66
2	18	female	Mouth\mf_fear_jumbled_mouth.jpg	mf	fear	no	yes	0	246	m	z	7	67
2	18	female	Mouth\jj_happy_jumbled_no_mouth.jpg	jj	happy	no	no	1	294	z	z	7	67
2	18	female	Mouth\pf_fear_up_no_mouth.jpg	pf	fear	yes	no	1	355	z	z	7	67
2	18	female	Mouth\sw_fear_up_no_mouth.jpg	sw	fear	yes	no	1	288	z	z	6	66
2	18	female	Mouth\mo_happy_jumbled_no_mouth.jpg	mo	happy	no	no	1	215	z	z	6	66
2	18	female	Mouth\em_fear_up_no_mouth.jpg	em	fear	yes	no	1	319	z	z	7	67
2	18	female	Mouth\em_fear_jumbled_no_mouth.jpg	em	fear	no	no	1	244	z	z	7	67
2	18	female	Mouth\mf_happy_up_mouth.jpg	mf	happy	yes	yes	1	322	m	m	7	67
2	18	female	Mouth\em_happy_jumbled_no_mouth.jpg	em	happy	no	no	1	303	z	z	6	66
2	18	female	Mouth\jj_fear_up_no_mouth.jpg	jj	fear	yes	no	1	324	z	z	6	66
2	18	female	Mouth\r_fear_up_mouth.jpg	r_	fear	yes	yes	1	225	m	m	7	67
2	18	female	Mouth\pe_fear_jumbled_mouth.jpg	pe	fear	no	yes	1	162	m	m	7	67
2	18	female	Mouth\jj_happy_up_mouth.jpg	jj	happy	yes	yes	1	278	m	m	7	67
2	18	female	Mouth\cc_happy_jumbled_no_mouth.jpg	cc	happy	no	no	1	460	z	z	6	66
2	18	female	Mouth\pf_happy_up_mouth.jpg	pf	happy	yes	yes	0	363	m	z	7	67
2	18	female	Mouth\mo_fear_jumbled_mouth.jpg	mo	fear	no	yes	0	279	m	z	6	66
2	18	female	Mouth\mf_fear_jumbled_no_mouth.jpg	mf	fear	no	no	1	518	z	z	7	67
2	18	female	Mouth\pe_happy_jumbled_no_mouth.jpg	pe	happy	no	no	0	291	z	m	6	66
2	18	female	Mouth\jj_happy_up_no_mouth.jpg	jj	happy	yes	no	1	265	z	z	7	67
2	18	female	Mouth\jj_fear_jumbled_no_mouth.jpg	jj	fear	no	no	1	401	z	z	7	67
2	18	female	Mouth\sw_happy_jumbled_mouth.jpg	sw	happy	no	yes	1	364	m	m	7	67
2	18	female	Mouth\r_happy_up_mouth.jpg	r_	happy	yes	yes	1	344	m	m	7	67
2	18	female	Mouth\pf_fear_up_mouth.jpg	pf	fear	yes	yes	1	171	m	m	6	66
2	18	female	Mouth\r_fear_jumbled_mouth.jpg	r_	fear	no	yes	1	134	m	m	6	66
2	18	female	Mouth\em_happy_up_no_mouth.jpg	em	happy	yes	no	1	347	z	z	6	66
2	18	female	Mouth\wf_fear_jumbled_mouth.jpg	wf	fear	no	yes	1	414	m	m	6	66
2	18	female	Mouth\r_fear_jumbled_no_mouth.jpg	r_	fear	no	no	1	399	z	z	7	67
2	18	female	Mouth\cc_fear_up_mouth.jpg	cc	fear	yes	yes	1	296	m	m	7	67
2	18	female	Mouth\em_happy_jumbled_mouth.jpg	em	happy	no	yes	1	198	m	m	7	67
2	18	female	Mouth\mf_happy_jumbled_mouth.jpg	mf	happy	no	yes	1	280	m	m	6	66
2	18	female	Mouth\mf_happy_up_no_mouth.jpg	mf	happy	yes	no	1	407	z	z	7	67
2	18	female	Mouth\cc_happy_jumbled_mouth.jpg	cc	happy	no	yes	1	361	m	m	6	66
2	18	female	Mouth\pf_fear_jumbled_mouth.jpg	pf	fear	no	yes	1	341	m	m	6	66
2	18	female	Mouth\em_happy_up_mouth.jpg	em	happy	yes	yes	1	330	m	m	7	67
2	18	female	Mouth\wf_fear_up_mouth.jpg	wf	fear	yes	yes	1	415	m	m	7	67
2	18	female	Mouth\sw_fear_jumbled_mouth.jpg	sw	fear	no	yes	0	351	m	z	7	67
2	18	female	Mouth\cc_fear_up_no_mouth.jpg	cc	fear	yes	no	1	404	z	z	6	66
2	18	female	Mouth\jj_happy_up_mouth.jpg	jj	happy	yes	yes	1	535	m	m	6	66
2	18	female	Mouth\wf_fear_jumbled_no_mouth.jpg	wf	fear	no	no	0	411	z	m	6	66
2	18	female	Mouth\jj_fear_up_no_mouth.jpg	jj	fear	yes	no	1	348	z	z	7	67
2	18	female	Mouth\cc_fear_jumbled_no_mouth.jpg	cc	fear	no	no	1	286	z	z	6	66
2	18	female	Mouth\em_happy_jumbled_mouth.jpg	em	happy	no	yes	1	332	m	m	7	67
2	18	female	Mouth\sw_fear_jumbled_no_mouth.jpg	sw	fear	no	no	1	521	z	z	6	66
2	18	female	Mouth\pf_happy_up_no_mouth.jpg	pf	happy	yes	no	1	311	z	z	6	66
2	18	female	Mouth\mf_happy_jumbled_mouth.jpg	mf	happy	no	yes	1	668	m	m	6	66
2	18	female	Mouth\r_fear_up_mouth.jpg	r_	fear	yes	yes	1	787	m	m	7	67
2	18	female	Mouth\wf_happy_jumbled_no_mouth.jpg	wf	happy	no	no	1	415	z	z	7	67
2	18	female	Mouth\mf_fear_jumbled_no_mouth.jpg	mf	fear	no	no	1	312	z	z	6	66
2	18	female	Mouth\mo_fear_up_mouth.jpg	mo	fear	yes	yes	1	317	m	m	6	66
2	18	female	Mouth\jj_happy_up_no_mouth.jpg	jj	happy	yes	no	1	370	z	z	7	67
2	18	female	Mouth\r_happy_up_no_mouth.jpg	r_	happy	yes	no	0	277	z	m	6	66
2	18	female	Mouth\sw_happy_jumbled_mouth.jpg	sw	happy	no	yes	1	380	m	m	6	66
2	18	female	Mouth\pf_fear_jumbled_no_mouth.jpg	pf	fear	no	no	1	367	z	z	7	67
2	18	female	Mouth\pe_fear_jumbled_no_mouth.jpg	pe	fear	no	no	1	370	z	z	6	66
2	18	female	Mouth\pe_fear_up_mouth.jpg	pe	fear	yes	yes	1	469	m	m	6	66
2	18	female	Mouth\mo_fear_jumbled_no_mouth.jpg	mo	fear	no	no	0	348	z	m	7	67
2	18	female	Mouth\cc_fear_up_mouth.jpg	cc	fear	yes	yes	0	352	m	z	7	67
2	18	female	Mouth\cc_happy_up_no_mouth.jpg	cc	happy	yes	no	0	419	z	m	7	67
2	18	female	Mouth\jj_fear_up_mouth.jpg	jj	fear	yes	yes	1	308	m	m	7	67
2	18	female	Mouth\cc_fear_up_no_mouth.jpg	cc	fear	yes	no	1	410	z	z	7	67
2	18	female	Mouth\em_fear_up_mouth.jpg	em	fear	yes	yes	1	443	m	m	7	67
2	18	female	Mouth\r_fear_up_no_mouth.jpg	r_	fear	yes	no	1	452	z	z	6	66
2	18	female	Mouth\mo_fear_jumbled_mouth.jpg	mo	fear	no	yes	1	581	m	m	7	67
2	18	female	Mouth\em_fear_jumbled_no_mouth.jpg	em	fear	no	no	0	439	z	m	7	67
2	18	female	Mouth\wf_fear_up_no_mouth.jpg	wf	fear	yes	no	1	326	z	z	7	67
2	18	female	Mouth\em_happy_up_mouth.jpg	em	happy	yes	yes	1	339	m	m	6	66
2	18	female	Mouth\mf_fear_up_mouth.jpg	mf	fear	yes	yes	1	911	m	m	7	67
2	18	female	Mouth\em_happy_up_no_mouth.jpg	em	happy	yes	no	1	350	z	z	7	67
2	18	female	Mouth\cc_fear_jumbled_mouth.jpg	cc	fear	no	yes	1	433	m	m	7	67
2	18	female	Mouth\r_happy_jumbled_no_mouth.jpg	r_	happy	no	no	1	377	z	z	7	67
2	18	female	Mouth\wf_happy_up_mouth.jpg	wf	happy	yes	yes	1	332	m	m	6	66
2	18	female	Mouth\pe_happy_jumbled_no_mouth.jpg	pe	happy	no	no	1	424	z	z	7	67
2	18	female	Mouth\wf_fear_jumbled_mouth.jpg	wf	fear	no	yes	1	378	m	m	7	67
2	18	female	Mouth\mf_fear_up_no_mouth.jpg	mf	fear	yes	no	1	428	z	z	6	66
2	18	female	Mouth\r_fear_jumbled_mouth.jpg	r_	fear	no	yes	1	437	m	m	7	67
2	18	female	Mouth\sw_happy_up_mouth.jpg	sw	happy	yes	yes	1	373	m	m	7	67
2	18	female	Mouth\r_happy_jumbled_mouth.jpg	r_	happy	no	yes	1	286	m	m	7	67
2	18	female	Mouth\r_happy_up_mouth.jpg	r_	happy	yes	yes	1	445	m	m	7	67
2	18	female	Mouth\mf_happy_up_no_mouth.jpg	mf	happy	yes	no	1	325	z	z	7	67
2	18	female	Mouth\mo_happy_jumbled_no_mouth.jpg	mo	happy	no	no	1	347	z	z	7	67
2	18	female	Mouth\jj_happy_jumbled_no_mouth.jpg	jj	happy	no	no	1	350	z	z	7	67
2	18	female	Mouth\sw_fear_jumbled_mouth.jpg	sw	fear	no	yes	0	448	m	z	7	67
2	18	female	Mouth\em_fear_up_no_mouth.jpg	em	fear	yes	no	1	424	z	z	6	66
2	18	female	Mouth\mo_happy_jumbled_mouth.jpg	mo	happy	no	yes	1	450	m	m	6	66
2	18	female	Mouth\pe_happy_up_mouth.jpg	pe	happy	yes	yes	1	467	m	m	7	67
2	18	female	Mouth\em_happy_jumbled_no_mouth.jpg	em	happy	no	no	0	457	z	m	7	67
2	18	female	Mouth\wf_happy_jumbled_mouth.jpg	wf	happy	no	yes	1	449	m	m	7	67
2	18	female	Mouth\pe_fear_up_no_mouth.jpg	pe	fear	yes	no	1	360	z	z	7	67
2	18	female	Mouth\mf_fear_jumbled_mouth.jpg	mf	fear	no	yes	1	468	m	m	7	67
2	18	female	Mouth\pf_happy_up_mouth.jpg	pf	happy	yes	yes	0	227	m	z	6	66
2	18	female	Mouth\mo_happy_up_no_mouth.jpg	mo	happy	yes	no	1	300	z	z	6	66
2	18	female	Mouth\pf_happy_jumbled_mouth.jpg	pf	happy	no	yes	0	330	m	z	6	66
2	18	female	Mouth\sw_fear_up_no_mouth.jpg	sw	fear	yes	no	1	655	z	z	6	66
2	18	female	Mouth\cc_happy_jumbled_no_mouth.jpg	cc	happy	no	no	1	375	z	z	6	66
2	18	female	Mouth\r_fear_jumbled_no_mouth.jpg	r_	fear	no	no	1	921	z	z	7	67
2	18	female	Mouth\pe_fear_jumbled_mouth.jpg	pe	fear	no	yes	1	447	m	m	7	67
2	18	female	Mouth\jj_fear_jumbled_no_mouth.jpg	jj	fear	no	no	0	855	z	m	7	67
2	18	female	Mouth\jj_fear_jumbled_mouth.jpg	jj	fear	no	yes	1	431	m	m	7	67
2	18	female	Mouth\wf_fear_up_mouth.jpg	wf	fear	yes	yes	1	400	m	m	6	66
2	18	female	Mouth\em_fear_jumbled_mouth.jpg	em	fear	no	yes	1	330	m	m	7	67
2	18	female	Mouth\cc_happy_jumbled_mouth.jpg	cc	happy	no	yes	1	463	m	m	6	66
2	18	female	Mouth\mo_happy_up_mouth.jpg	mo	happy	yes	yes	1	383	m	m	6	66
2	18	female	Mouth\sw_happy_jumbled_no_mouth.jpg	sw	happy	no	no	1	321	z	z	7	67
2	18	female	Mouth\mf_happy_jumbled_no_mouth.jpg	mf	happy	no	no	1	414	z	z	6	66
2	18	female	Mouth\sw_fear_up_mouth.jpg	sw	fear	yes	yes	1	430	m	m	6	66
2	18	female	Mouth\wf_happy_up_no_mouth.jpg	wf	happy	yes	no	1	358	z	z	7	67
2	18	female	Mouth\pf_fear_up_no_mouth.jpg	pf	fear	yes	no	1	298	z	z	7	67
2	18	female	Mouth\jj_happy_jumbled_mouth.jpg	jj	happy	no	yes	1	336	m	m	7	67
2	18	female	Mouth\pe_happy_up_no_mouth.jpg	pe	happy	yes	no	0	412	z	m	6	66
2	18	female	Mouth\mf_happy_up_mouth.jpg	mf	happy	yes	yes	1	396	m	m	6	66
2	18	female	Mouth\pe_happy_jumbled_mouth.jpg	pe	happy	no	yes	1	327	m	m	7	67
2	18	female	Mouth\pf_fear_jumbled_mouth.jpg	pf	fear	no	yes	1	364	m	m	7	67
2	18	female	Mouth\pf_happy_jumbled_no_mouth.jpg	pf	happy	no	no	0	166	z	m	7	67
2	18	female	Mouth\pf_fear_up_mouth.jpg	pf	fear	yes	yes	1	336	m	m	7	67
2	18	female	Mouth\cc_happy_up_mouth.jpg	cc	happy	yes	yes	1	916	m	m	7	67
2	18	female	Mouth\mo_fear_up_no_mouth.jpg	mo	fear	yes	no	1	458	z	z	7	67
2	18	female	Mouth\sw_happy_up_no_mouth.jpg	sw	happy	yes	no	1	393	z	z	6	66
2	18	female	Mouth\wf_happy_jumbled_no_mouth.jpg	wf	happy	no	no	0	310	z	m	6	66
2	18	female	Mouth\em_happy_up_no_mouth.jpg	em	happy	yes	no	1	300	z	z	7	67
2	18	female	Mouth\jj_happy_jumbled_mouth.jpg	jj	happy	no	yes	1	426	m	m	7	67
2	18	female	Mouth\sw_happy_up_mouth.jpg	sw	happy	yes	yes	1	362	m	m	7	67
2	18	female	Mouth\jj_fear_jumbled_no_mouth.jpg	jj	fear	no	no	0	485	z	m	7	67
2	18	female	Mouth\cc_fear_up_no_mouth.jpg	cc	fear	yes	no	1	349	z	z	7	67
2	18	female	Mouth\mo_happy_up_no_mouth.jpg	mo	happy	yes	no	0	409	z	m	7	67
2	18	female	Mouth\r_fear_jumbled_no_mouth.jpg	r_	fear	no	no	0	538	z	m	7	67
2	18	female	Mouth\em_fear_jumbled_no_mouth.jpg	em	fear	no	no	0	318	z	m	7	67
2	18	female	Mouth\pe_happy_up_mouth.jpg	pe	happy	yes	yes	1	332	m	m	7	67
2	18	female	Mouth\cc_happy_up_mouth.jpg	cc	happy	yes	yes	1	335	m	m	6	66
2	18	female	Mouth\cc_fear_jumbled_no_mouth.jpg	cc	fear	no	no	0	363	z	m	6	66
2	18	female	Mouth\pf_happy_jumbled_no_mouth.jpg	pf	happy	no	no	1	1358	z	z	7	67
2	18	female	Mouth\sw_fear_jumbled_no_mouth.jpg	sw	fear	no	no	1	481	z	z	6	66
2	18	female	Mouth\pe_fear_jumbled_no_mouth.jpg	pe	fear	no	no	1	296	z	z	7	67
2	18	female	Mouth\pf_fear_jumbled_mouth.jpg	pf	fear	no	yes	1	414	m	m	7	67
2	18	female	Mouth\wf_fear_jumbled_mouth.jpg	wf	fear	no	yes	1	336	m	m	7	67
2	18	female	Mouth\pf_fear_jumbled_no_mouth.jpg	pf	fear	no	no	1	324	z	z	6	66
2	18	female	Mouth\wf_fear_up_mouth.jpg	wf	fear	yes	yes	1	450	m	m	6	66
2	18	female	Mouth\pe_fear_jumbled_mouth.jpg	pe	fear	no	yes	1	362	m	m	7	67
2	18	female	Mouth\mf_happy_up_no_mouth.jpg	mf	happy	yes	no	0	438	z	m	7	67
2	18	female	Mouth\cc_fear_jumbled_mouth.jpg	cc	fear	no	yes	0	318	m	z	7	67
2	18	female	Mouth\r_happy_up_mouth.jpg	r_	happy	yes	yes	1	347	m	m	7	67
2	18	female	Mouth\jj_happy_jumbled_no_mouth.jpg	jj	happy	no	no	1	447	z	z	7	67
2	18	female	Mouth\em_happy_up_mouth.jpg	em	happy	yes	yes	1	279	m	m	7	67
2	18	female	Mouth\r_happy_jumbled_mouth.jpg	r_	happy	no	yes	1	364	m	m	7	67
2	18	female	Mouth\jj_fear_jumbled_mouth.jpg	jj	fear	no	yes	1	231	m	m	6	66
2	18	female	Mouth\mo_fear_up_mouth.jpg	mo	fear	yes	yes	1	287	m	m	7	67
2	18	female	Mouth\wf_happy_up_mouth.jpg	wf	happy	yes	yes	1	357	m	m	6	66
2	18	female	Mouth\cc_happy_jumbled_mouth.jpg	cc	happy	no	yes	1	498	m	m	7	67
2	18	female	Mouth\sw_fear_up_mouth.jpg	sw	fear	yes	yes	1	399	m	m	7	67
2	18	female	Mouth\jj_fear_up_no_mouth.jpg	jj	fear	yes	no	1	464	z	z	6	66
2	18	female	Mouth\cc_fear_up_mouth.jpg	cc	fear	yes	yes	1	375	m	m	7	67
2	18	female	Mouth\mo_happy_jumbled_mouth.jpg	mo	happy	no	yes	1	306	m	m	7	67
2	18	female	Mouth\pf_fear_up_no_mouth.jpg	pf	fear	yes	no	1	1432	z	z	7	67
2	18	female	Mouth\r_happy_up_no_mouth.jpg	r_	happy	yes	no	1	336	z	z	6	66
2	18	female	Mouth\pf_happy_up_no_mouth.jpg	pf	happy	yes	no	1	525	z	z	6	66
2	18	female	Mouth\sw_happy_jumbled_mouth.jpg	sw	happy	no	yes	1	458	m	m	7	67
2	18	female	Mouth\sw_happy_up_no_mouth.jpg	sw	happy	yes	no	1	450	z	z	7	67
2	18	female	Mouth\mo_fear_jumbled_no_mouth.jpg	mo	fear	no	no	0	410	z	m	7	67
2	18	female	Mouth\mo_happy_jumbled_no_mouth.jpg	mo	happy	no	no	1	444	z	z	7	67
2	18	female	Mouth\sw_fear_jumbled_mouth.jpg	sw	fear	no	yes	1	443	m	m	7	67
2	18	female	Mouth\r_fear_up_no_mouth.jpg	r_	fear	yes	no	1	387	z	z	7	67
2	18	female	Mouth\sw_fear_up_no_mouth.jpg	sw	fear	yes	no	0	511	z	m	7	67
2	18	female	Mouth\r_fear_jumbled_mouth.jpg	r_	fear	no	yes	1	404	m	m	7	67
2	18	female	Mouth\pf_fear_up_mouth.jpg	pf	fear	yes	yes	1	548	m	m	6	66
2	18	female	Mouth\cc_happy_up_no_mouth.jpg	cc	happy	yes	no	0	344	z	m	6	66
2	18	female	Mouth\mf_fear_up_mouth.jpg	mf	fear	yes	yes	1	492	m	m	7	67
2	18	female	Mouth\cc_happy_jumbled_no_mouth.jpg	cc	happy	no	no	0	394	z	m	7	67
2	18	female	Mouth\mf_happy_jumbled_no_mouth.jpg	mf	happy	no	no	1	388	z	z	7	67
2	18	female	Mouth\sw_happy_jumbled_no_mouth.jpg	sw	happy	no	no	1	398	z	z	6	66
2	18	female	Mouth\em_fear_up_mouth.jpg	em	fear	yes	yes	0	353	m	z	7	67
2	18	female	Mouth\jj_happy_up_mouth.jpg	jj	happy	yes	yes	1	453	m	m	7	67
2	18	female	Mouth\wf_fear_jumbled_no_mouth.jpg	wf	fear	no	no	1	428	z	z	6	66
2	18	female	Mouth\mf_fear_jumbled_no_mouth.jpg	mf	fear	no	no	1	388	z	z	7	67
2	18	female	Mouth\pe_happy_up_no_mouth.jpg	pe	happy	yes	no	1	319	z	z	6	66
2	18	female	Mouth\em_happy_jumbled_no_mouth.jpg	em	happy	no	no	1	348	z	z	7	67
2	18	female	Mouth\wf_fear_up_no_mouth.jpg	wf	fear	yes	no	1	495	z	z	7	67
2	18	female	Mouth\mf_happy_up_mouth.jpg	mf	happy	yes	yes	1	379	m	m	7	67
2	18	female	Mouth\r_fear_up_mouth.jpg	r_	fear	yes	yes	1	294	m	m	6	66
2	18	female	Mouth\r_happy_jumbled_no_mouth.jpg	r_	happy	no	no	1	516	z	z	7	67
2	18	female	Mouth\mo_fear_up_no_mouth.jpg	mo	fear	yes	no	1	394	z	z	7	67
2	18	female	Mouth\pe_happy_jumbled_no_mouth.jpg	pe	happy	no	no	1	676	z	z	7	67
2	18	female	Mouth\jj_fear_up_mouth.jpg	jj	fear	yes	yes	1	377	m	m	7	67
2	18	female	Mouth\wf_happy_up_no_mouth.jpg	wf	happy	yes	no	1	524	z	z	7	67
2	18	female	Mouth\em_fear_up_no_mouth.jpg	em	fear	yes	no	1	321	z	z	6	66
2	18	female	Mouth\pf_happy_jumbled_mouth.jpg	pf	happy	no	yes	0	286	m	z	7	67
2	18	female	Mouth\mf_happy_jumbled_mouth.jpg	mf	happy	no	yes	0	213	m	z	7	67
2	18	female	Mouth\mf_fear_jumbled_mouth.jpg	mf	fear	no	yes	1	502	m	m	6	66
2	18	female	Mouth\mo_happy_up_mouth.jpg	mo	happy	yes	yes	1	429	m	m	7	67
2	18	female	Mouth\mo_fear_jumbled_mouth.jpg	mo	fear	no	yes	0	638	m	z	7	67
2	18	female	Mouth\wf_happy_jumbled_mouth.jpg	wf	happy	no	yes	1	382	m	m	7	67
2	18	female	Mouth\em_fear_jumbled_mouth.jpg	em	fear	no	yes	1	680	m	m	7	67
2	18	female	Mouth\pe_happy_jumbled_mouth.jpg	pe	happy	no	yes	1	480	m	m	7	67
2	18	female	Mouth\em_happy_jumbled_mouth.jpg	em	happy	no	yes	1	526	m	m	7	67
2	18	female	Mouth\pe_fear_up_no_mouth.jpg	pe	fear	yes	no	1	451	z	z	7	67
2	18	female	Mouth\pf_happy_up_mouth.jpg	pf	happy	yes	yes	0	427	m	z	7	67
2	18	female	Mouth\mf_fear_up_no_mouth.jpg	mf	fear	yes	no	1	300	z	z	6	66
2	18	female	Mouth\pe_fear_up_mouth.jpg	pe	fear	yes	yes	1	490	m	m	7	67
2	18	female	Mouth\jj_happy_up_no_mouth.jpg	jj	happy	yes	no	1	408	z	z	7	67
4	19	female	Mouth\sw_fear_up_mouth.jpg	sw	fear	yes	yes	1	615	m	m	7	67
4	19	female	Mouth\mo_fear_up_mouth.jpg	mo	fear	yes	yes	0	469	m	z	6	66
4	19	female	Mouth\em_fear_up_no_mouth.jpg	em	fear	yes	no	1	265	z	z	6	66
4	19	female	Mouth\pf_happy_jumbled_no_mouth.jpg	pf	happy	no	no	1	247	z	z	6	66
4	19	female	Mouth\r_fear_up_mouth.jpg	r_	fear	yes	yes	0	407	m	z	6	66
4	19	female	Mouth\jj_fear_jumbled_no_mouth.jpg	jj	fear	no	no	1	242	z	z	7	67
4	19	female	Mouth\sw_fear_up_no_mouth.jpg	sw	fear	yes	no	1	243	z	z	7	67
4	19	female	Mouth\mo_happy_up_no_mouth.jpg	mo	happy	yes	no	1	179	z	z	6	66
4	19	female	Mouth\em_happy_jumbled_mouth.jpg	em	happy	no	yes	0	150	m	z	7	67
4	19	female	Mouth\r_happy_up_no_mouth.jpg	r_	happy	yes	no	1	185	z	z	7	67
4	19	female	Mouth\mo_fear_up_no_mouth.jpg	mo	fear	yes	no	1	260	z	z	6	66
4	19	female	Mouth\wf_happy_up_mouth.jpg	wf	happy	yes	yes	1	379	m	m	6	66
4	19	female	Mouth\r_fear_up_no_mouth.jpg	r_	fear	yes	no	1	238	z	z	7	67
4	19	female	Mouth\sw_happy_jumbled_mouth.jpg	sw	happy	no	yes	1	311	m	m	7	67
4	19	female	Mouth\mf_happy_up_no_mouth.jpg	mf	happy	yes	no	1	237	z	z	7	67
4	19	female	Mouth\wf_happy_jumbled_no_mouth.jpg	wf	happy	no	no	1	230	z	z	7	67
4	19	female	Mouth\cc_fear_jumbled_mouth.jpg	cc	fear	no	yes	1	213	m	m	7	67
4	19	female	Mouth\jj_happy_jumbled_no_mouth.jpg	jj	happy	no	no	1	301	z	z	6	66
4	19	female	Mouth\mo_fear_jumbled_mouth.jpg	mo	fear	no	yes	0	300	m	z	7	67
4	19	female	Mouth\em_fear_jumbled_no_mouth.jpg	em	fear	no	no	1	281	z	z	7	67
4	19	female	Mouth\jj_fear_up_no_mouth.jpg	jj	fear	yes	no	1	295	z	z	7	67
4	19	female	Mouth\sw_fear_jumbled_no_mouth.jpg	sw	fear	no	no	1	189	z	z	7	67
4	19	female	Mouth\mo_happy_up_mouth.jpg	mo	happy	yes	yes	1	184	m	m	7	67
4	19	female	Mouth\mf_fear_up_no_mouth.jpg	mf	fear	yes	no	1	266	z	z	6	66
4	19	female	Mouth\mo_happy_jumbled_mouth.jpg	mo	happy	no	yes	1	274	m	m	6	66
4	19	female	Mouth\pe_fear_up_mouth.jpg	pe	fear	yes	yes	1	217	m	m	6	66
4	19	female	Mouth\em_happy_up_no_mouth.jpg	em	happy	yes	no	1	227	z	z	6	66
4	19	female	Mouth\wf_fear_up_no_mouth.jpg	wf	fear	yes	no	0	339	z	m	7	67
4	19	female	Mouth\r_happy_up_mouth.jpg	r_	happy	yes	yes	0	160	m	z	6	66
4	19	female	Mouth\em_happy_jumbled_no_mouth.jpg	em	happy	no	no	1	291	z	z	7	67
4	19	female	Mouth\cc_fear_up_mouth.jpg	cc	fear	yes	yes	1	176	m	m	7	67
4	19	female	Mouth\r_fear_jumbled_no_mouth.jpg	r_	fear	no	no	1	323	z	z	7	67
4	19	female	Mouth\pf_happy_up_mouth.jpg	pf	happy	yes	yes	1	512	m	m	6	66
4	19	female	Mouth\mf_happy_jumbled_no_mouth.jpg	mf	happy	no	no	1	245	z	z	7	67
4	19	female	Mouth\mf_fear_up_mouth.jpg	mf	fear	yes	yes	0	397	m	z	6	66
4	19	female	Mouth\sw_happy_jumbled_no_mouth.jpg	sw	happy	no	no	1	343	z	z	6	66
4	19	female	Mouth\sw_fear_jumbled_mouth.jpg	sw	fear	no	yes	1	218	m	m	6	66
4	19	female	Mouth\cc_fear_up_no_mouth.jpg	cc	fear	yes	no	1	572	z	z	7	67
4	19	female	Mouth\cc_happy_up_no_mouth.jpg	cc	happy	yes	no	0	14735	z	m	6	66
4	19	female	Mouth\jj_fear_jumbled_mouth.jpg	jj	fear	no	yes	1	393	m	m	7	67
4	19	female	Mouth\em_fear_jumbled_mouth.jpg	em	fear	no	yes	1	219	m	m	7	67
4	19	female	Mouth\pf_fear_jumbled_no_mouth.jpg	pf	fear	no	no	1	244	z	z	7	67
4	19	female	Mouth\pe_fear_jumbled_no_mouth.jpg	pe	fear	no	no	1	252	z	z	7	67
4	19	female	Mouth\mf_happy_jumbled_mouth.jpg	mf	happy	no	yes	1	267	m	m	7	67
4	19	female	Mouth\pe_happy_jumbled_mouth.jpg	pe	happy	no	yes	1	218	m	m	7	67
4	19	female	Mouth\r_fear_jumbled_mouth.jpg	r_	fear	no	yes	1	187	m	m	7	67
4	19	female	Mouth\mf_happy_up_mouth.jpg	mf	happy	yes	yes	1	285	m	m	7	67
4	19	female	Mouth\jj_fear_up_mouth.jpg	jj	fear	yes	yes	1	243	m	m	6	66
4	19	female	Mouth\wf_fear_up_mouth.jpg	wf	fear	yes	yes	1	236	m	m	7	67
4	19	female	Mouth\wf_fear_jumbled_mouth.jpg	wf	fear	no	yes	1	164	m	m	6	66
4	19	female	Mouth\pe_fear_jumbled_mouth.jpg	pe	fear	no	yes	1	224	m	m	6	66
4	19	female	Mouth\em_happy_up_mouth.jpg	em	happy	yes	yes	1	201	m	m	6	66
4	19	female	Mouth\wf_happy_jumbled_mouth.jpg	wf	happy	no	yes	1	138	m	m	6	66
4	19	female	Mouth\pf_fear_up_no_mouth.jpg	pf	fear	yes	no	0	231	z	m	7	67
4	19	female	Mouth\cc_happy_jumbled_mouth.jpg	cc	happy	no	yes	1	208	m	m	7	67
4	19	female	Mouth\cc_happy_up_mouth.jpg	cc	happy	yes	yes	1	209	m	m	6	66
4	19	female	Mouth\jj_happy_up_no_mouth.jpg	jj	happy	yes	no	0	370	z	m	6	66
4	19	female	Mouth\pf_happy_jumbled_mouth.jpg	pf	happy	no	yes	0	261	m	z	7	67
4	19	female	Mouth\pf_fear_jumbled_mouth.jpg	pf	fear	no	yes	1	293	m	m	6	66
4	19	female	Mouth\cc_happy_jumbled_no_mouth.jpg	cc	happy	no	no	0	139	z	m	6	66
4	19	female	Mouth\sw_happy_up_no_mouth.jpg	sw	happy	yes	no	1	279	z	z	7	67
4	19	female	Mouth\mf_fear_jumbled_no_mouth.jpg	mf	fear	no	no	0	326	z	m	6	66
4	19	female	Mouth\r_happy_jumbled_no_mouth.jpg	r_	happy	no	no	1	283	z	z	7	67
4	19	female	Mouth\mf_fear_jumbled_mouth.jpg	mf	fear	no	yes	0	161	m	z	6	66
4	19	female	Mouth\pe_happy_jumbled_no_mouth.jpg	pe	happy	no	no	1	364	z	z	6	66
4	19	female	Mouth\wf_fear_jumbled_no_mouth.jpg	wf	fear	no	no	1	221	z	z	6	66
4	19	female	Mouth\pf_fear_up_mouth.jpg	pf	fear	yes	yes	1	222	m	m	7	67
4	19	female	Mouth\jj_happy_jumbled_mouth.jpg	jj	happy	no	yes	1	175	m	m	7	67
4	19	female	Mouth\r_happy_jumbled_mouth.jpg	r_	happy	no	yes	1	137	m	m	6	66
4	19	female	Mouth\mo_fear_jumbled_no_mouth.jpg	mo	fear	no	no	1	294	z	z	7	67
4	19	female	Mouth\pe_happy_up_no_mouth.jpg	pe	happy	yes	no	1	395	z	z	7	67
4	19	female	Mouth\pf_happy_up_no_mouth.jpg	pf	happy	yes	no	1	238	z	z	6	66
4	19	female	Mouth\wf_happy_up_no_mouth.jpg	wf	happy	yes	no	0	366	z	m	7	67
4	19	female	Mouth\pe_fear_up_no_mouth.jpg	pe	fear	yes	no	1	218	z	z	7	67
4	19	female	Mouth\jj_happy_up_mouth.jpg	jj	happy	yes	yes	1	259	m	m	7	67
4	19	female	Mouth\em_fear_up_mouth.jpg	em	fear	yes	yes	1	187	m	m	7	67
4	19	female	Mouth\sw_happy_up_mouth.jpg	sw	happy	yes	yes	1	156	m	m	7	67
4	19	female	Mouth\pe_happy_up_mouth.jpg	pe	happy	yes	yes	1	153	m	m	6	66
4	19	female	Mouth\mo_happy_jumbled_no_mouth.jpg	mo	happy	no	no	0	365	z	m	7	67
4	19	female	Mouth\cc_fear_jumbled_no_mouth.jpg	cc	fear	no	no	0	184	z	m	6	66
4	19	female	Mouth\mo_happy_up_no_mouth.jpg	mo	happy	yes	no	1	266	z	z	7	67
4	19	female	Mouth\sw_happy_jumbled_mouth.jpg	sw	happy	no	yes	1	178	m	m	7	67
4	19	female	Mouth\r_fear_up_no_mouth.jpg	r_	fear	yes	no	1	309	z	z	7	67
4	19	female	Mouth\r_happy_up_no_mouth.jpg	r_	happy	yes	no	1	240	z	z	7	67
4	19	female	Mouth\r_happy_up_mouth.jpg	r_	happy	yes	yes	1	322	m	m	7	67
4	19	female	Mouth\em_fear_up_no_mouth.jpg	em	fear	yes	no	1	295	z	z	7	67
4	19	female	Mouth\pf_happy_up_no_mouth.jpg	pf	happy	yes	no	1	213	z	z	6	66
4	19	female	Mouth\jj_happy_jumbled_mouth.jpg	jj	happy	no	yes	1	270	m	m	7	67
4	19	female	Mouth\wf_happy_up_no_mouth.jpg	wf	happy	yes	no	0	502	z	m	7	67
4	19	female	Mouth\em_happy_jumbled_no_mouth.jpg	em	happy	no	no	1	659	z	z	7	67
4	19	female	Mouth\cc_fear_up_no_mouth.jpg	cc	fear	yes	no	1	387	z	z	7	67
4	19	female	Mouth\r_fear_jumbled_mouth.jpg	r_	fear	no	yes	1	221	m	m	7	67
4	19	female	Mouth\cc_fear_jumbled_no_mouth.jpg	cc	fear	no	no	0	278	z	m	7	67
4	19	female	Mouth\cc_happy_up_no_mouth.jpg	cc	happy	yes	no	1	292	z	z	7	67
4	19	female	Mouth\cc_fear_jumbled_mouth.jpg	cc	fear	no	yes	0	330	m	z	7	67
4	19	female	Mouth\wf_happy_jumbled_mouth.jpg	wf	happy	no	yes	1	197	m	m	7	67
4	19	female	Mouth\mf_fear_up_mouth.jpg	mf	fear	yes	yes	0	319	m	z	6	66
4	19	female	Mouth\jj_happy_up_no_mouth.jpg	jj	happy	yes	no	0	356	z	m	7	67
4	19	female	Mouth\r_fear_jumbled_no_mouth.jpg	r_	fear	no	no	1	464	z	z	7	67
4	19	female	Mouth\pf_happy_jumbled_mouth.jpg	pf	happy	no	yes	0	416	m	z	7	67
4	19	female	Mouth\pf_fear_up_no_mouth.jpg	pf	fear	yes	no	1	273	z	z	7	67
4	19	female	Mouth\mo_happy_jumbled_mouth.jpg	mo	happy	no	yes	1	265	m	m	7	67
4	19	female	Mouth\r_happy_jumbled_mouth.jpg	r_	happy	no	yes	1	175	m	m	7	67
4	19	female	Mouth\em_happy_jumbled_mouth.jpg	em	happy	no	yes	1	217	m	m	6	66
4	19	female	Mouth\pf_happy_jumbled_no_mouth.jpg	pf	happy	no	no	1	322	z	z	7	67
4	19	female	Mouth\em_fear_jumbled_mouth.jpg	em	fear	no	yes	1	215	m	m	6	66
4	19	female	Mouth\jj_fear_jumbled_mouth.jpg	jj	fear	no	yes	1	247	m	m	7	67
4	19	female	Mouth\sw_happy_up_mouth.jpg	sw	happy	yes	yes	1	711	m	m	7	67
4	19	female	Mouth\pf_fear_jumbled_no_mouth.jpg	pf	fear	no	no	1	372	z	z	6	66
4	19	female	Mouth\mo_fear_up_no_mouth.jpg	mo	fear	yes	no	1	544	z	z	7	67
4	19	female	Mouth\em_fear_jumbled_no_mouth.jpg	em	fear	no	no	1	651	z	z	6	66
4	19	female	Mouth\mo_fear_up_mouth.jpg	mo	fear	yes	yes	0	379	m	z	6	66
4	19	female	Mouth\mf_fear_jumbled_mouth.jpg	mf	fear	no	yes	1	414	m	m	7	67
4	19	female	Mouth\mf_happy_up_no_mouth.jpg	mf	happy	yes	no	0	423	z	m	7	67
4	19	female	Mouth\pe_fear_up_no_mouth.jpg	pe	fear	yes	no	1	456	z	z	6	66
4	19	female	Mouth\jj_fear_jumbled_no_mouth.jpg	jj	fear	no	no	1	272	z	z	6	66
4	19	female	Mouth\jj_happy_up_mouth.jpg	jj	happy	yes	yes	1	255	m	m	6	66
4	19	female	Mouth\sw_fear_jumbled_mouth.jpg	sw	fear	no	yes	1	238	m	m	7	67
4	19	female	Mouth\pe_fear_jumbled_no_mouth.jpg	pe	fear	no	no	1	359	z	z	7	67
4	19	female	Mouth\pf_fear_jumbled_mouth.jpg	pf	fear	no	yes	1	211	m	m	7	67
4	19	female	Mouth\r_happy_jumbled_no_mouth.jpg	r_	happy	no	no	1	260	z	z	7	67
4	19	female	Mouth\sw_fear_up_mouth.jpg	sw	fear	yes	yes	0	361	m	z	7	67
4	19	female	Mouth\pe_happy_jumbled_mouth.jpg	pe	happy	no	yes	1	213	m	m	6	66
4	19	female	Mouth\mf_happy_up_mouth.jpg	mf	happy	yes	yes	0	237	m	z	6	66
4	19	female	Mouth\cc_fear_up_mouth.jpg	cc	fear	yes	yes	1	421	m	m	6	66
4	19	female	Mouth\jj_fear_up_mouth.jpg	jj	fear	yes	yes	1	278	m	m	6	66
4	19	female	Mouth\sw_fear_up_no_mouth.jpg	sw	fear	yes	no	0	541	z	m	7	67
4	19	female	Mouth\wf_happy_jumbled_no_mouth.jpg	wf	happy	no	no	1	243	z	z	7	67
4	19	female	Mouth\cc_happy_up_mouth.jpg	cc	happy	yes	yes	0	202	m	z	7	67
4	19	female	Mouth\jj_happy_jumbled_no_mouth.jpg	jj	happy	no	no	1	188	z	z	7	67
4	19	female	Mouth\jj_fear_up_no_mouth.jpg	jj	fear	yes	no	1	229	z	z	7	67
4	19	female	Mouth\mo_happy_up_mouth.jpg	mo	happy	yes	yes	1	319	m	m	7	67
4	19	female	Mouth\mo_happy_jumbled_no_mouth.jpg	mo	happy	no	no	0	548	z	m	7	67
4	19	female	Mouth\pe_fear_up_mouth.jpg	pe	fear	yes	yes	1	224	m	m	7	67
4	19	female	Mouth\em_happy_up_mouth.jpg	em	happy	yes	yes	1	265	m	m	7	67
4	19	female	Mouth\wf_fear_up_mouth.jpg	wf	fear	yes	yes	1	225	m	m	7	67
4	19	female	Mouth\wf_fear_jumbled_mouth.jpg	wf	fear	no	yes	1	218	m	m	7	67
4	19	female	Mouth\pe_happy_up_no_mouth.jpg	pe	happy	yes	no	0	171	z	m	6	66
4	19	female	Mouth\em_fear_up_mouth.jpg	em	fear	yes	yes	1	279	m	m	7	67
4	19	female	Mouth\r_fear_up_mouth.jpg	r_	fear	yes	yes	0	277	m	z	6	66
4	19	female	Mouth\mf_happy_jumbled_no_mouth.jpg	mf	happy	no	no	1	380	z	z	7	67
4	19	female	Mouth\pe_happy_up_mouth.jpg	pe	happy	yes	yes	1	286	m	m	6	66
4	19	female	Mouth\sw_happy_up_no_mouth.jpg	sw	happy	yes	no	1	340	z	z	7	67
4	19	female	Mouth\cc_happy_jumbled_no_mouth.jpg	cc	happy	no	no	1	273	z	z	6	66
4	19	female	Mouth\mf_happy_jumbled_mouth.jpg	mf	happy	no	yes	1	272	m	m	6	66
4	19	female	Mouth\sw_fear_jumbled_no_mouth.jpg	sw	fear	no	no	1	383	z	z	7	67
4	19	female	Mouth\sw_happy_jumbled_no_mouth.jpg	sw	happy	no	no	0	394	z	m	6	66
4	19	female	Mouth\pf_fear_up_mouth.jpg	pf	fear	yes	yes	1	219	m	m	6	66
4	19	female	Mouth\mf_fear_up_no_mouth.jpg	mf	fear	yes	no	1	332	z	z	7	67
4	19	female	Mouth\pe_happy_jumbled_no_mouth.jpg	pe	happy	no	no	1	289	z	z	7	67
4	19	female	Mouth\wf_fear_up_no_mouth.jpg	wf	fear	yes	no	1	439	z	z	7	67
4	19	female	Mouth\wf_happy_up_mouth.jpg	wf	happy	yes	yes	1	239	m	m	6	66
4	19	female	Mouth\mo_fear_jumbled_no_mouth.jpg	mo	fear	no	no	1	328	z	z	7	67
4	19	female	Mouth\cc_happy_jumbled_mouth.jpg	cc	happy	no	yes	1	261	m	m	6	66
4	19	female	Mouth\wf_fear_jumbled_no_mouth.jpg	wf	fear	no	no	1	363	z	z	7	67
4	19	female	Mouth\pe_fear_jumbled_mouth.jpg	pe	fear	no	yes	1	271	m	m	7	67
4	19	female	Mouth\em_happy_up_no_mouth.jpg	em	happy	yes	no	1	311	z	z	6	66
4	19	female	Mouth\pf_happy_up_mouth.jpg	pf	happy	yes	yes	0	468	m	z	7	67
4	19	female	Mouth\mf_fear_jumbled_no_mouth.jpg	mf	fear	no	no	1	276	z	z	7	67
4	19	female	Mouth\mo_fear_jumbled_mouth.jpg	mo	fear	no	yes	1	227	m	m	7	67
4	19	female	Mouth\mo_happy_up_no_mouth.jpg	mo	happy	yes	no	1	206	z	z	7	67
4	19	female	Mouth\cc_happy_jumbled_no_mouth.jpg	cc	happy	no	no	1	328	z	z	6	66
4	19	female	Mouth\cc_happy_jumbled_mouth.jpg	cc	happy	no	yes	1	213	m	m	7	67
4	19	female	Mouth\r_fear_up_no_mouth.jpg	r_	fear	yes	no	1	191	z	z	6	66
4	19	female	Mouth\r_fear_jumbled_no_mouth.jpg	r_	fear	no	no	1	361	z	z	6	66
4	19	female	Mouth\em_happy_up_no_mouth.jpg	em	happy	yes	no	1	165	z	z	7	67
4	19	female	Mouth\mf_fear_jumbled_no_mouth.jpg	mf	fear	no	no	1	288	z	z	6	66
4	19	female	Mouth\mo_fear_jumbled_mouth.jpg	mo	fear	no	yes	1	247	m	m	6	66
4	19	female	Mouth\jj_happy_up_mouth.jpg	jj	happy	yes	yes	1	183	m	m	6	66
4	19	female	Mouth\em_fear_jumbled_no_mouth.jpg	em	fear	no	no	0	177	z	m	7	67
4	19	female	Mouth\cc_fear_up_no_mouth.jpg	cc	fear	yes	no	1	292	z	z	7	67
4	19	female	Mouth\mo_happy_jumbled_mouth.jpg	mo	happy	no	yes	1	162	m	m	7	67
4	19	female	Mouth\wf_fear_jumbled_mouth.jpg	wf	fear	no	yes	1	238	m	m	7	67
4	19	female	Mouth\jj_happy_up_no_mouth.jpg	jj	happy	yes	no	1	286	z	z	6	66
4	19	female	Mouth\jj_fear_jumbled_no_mouth.jpg	jj	fear	no	no	0	317	z	m	6	66
4	19	female	Mouth\pe_happy_up_no_mouth.jpg	pe	happy	yes	no	0	130	z	m	7	67
4	19	female	Mouth\cc_happy_up_no_mouth.jpg	cc	happy	yes	no	1	287	z	z	7	67
4	19	female	Mouth\mf_happy_jumbled_mouth.jpg	mf	happy	no	yes	1	220	m	m	7	67
4	19	female	Mouth\wf_fear_jumbled_no_mouth.jpg	wf	fear	no	no	0	197	z	m	7	67
4	19	female	Mouth\sw_happy_jumbled_mouth.jpg	sw	happy	no	yes	1	191	m	m	7	67
4	19	female	Mouth\pf_fear_jumbled_no_mouth.jpg	pf	fear	no	no	1	217	z	z	6	66
4	19	female	Mouth\pf_fear_jumbled_mouth.jpg	pf	fear	no	yes	1	211	m	m	6	66
4	19	female	Mouth\sw_fear_jumbled_mouth.jpg	sw	fear	no	yes	1	155	m	m	7	67
4	19	female	Mouth\mo_fear_jumbled_no_mouth.jpg	mo	fear	no	no	1	295	z	z	6	66
4	19	female	Mouth\mf_fear_jumbled_mouth.jpg	mf	fear	no	yes	1	245	m	m	6	66
4	19	female	Mouth\wf_fear_up_mouth.jpg	wf	fear	yes	yes	0	358	m	z	7	67
4	19	female	Mouth\wf_happy_jumbled_mouth.jpg	wf	happy	no	yes	1	233	m	m	7	67
4	19	female	Mouth\pe_fear_jumbled_no_mouth.jpg	pe	fear	no	no	1	281	z	z	6	66
4	19	female	Mouth\r_happy_jumbled_no_mouth.jpg	r_	happy	no	no	1	312	z	z	7	67
4	19	female	Mouth\cc_happy_up_mouth.jpg	cc	happy	yes	yes	1	212	m	m	7	67
4	19	female	Mouth\sw_fear_up_mouth.jpg	sw	fear	yes	yes	1	237	m	m	7	67
4	19	female	Mouth\pe_happy_jumbled_mouth.jpg	pe	happy	no	yes	1	246	m	m	6	66
4	19	female	Mouth\r_fear_up_mouth.jpg	r_	fear	yes	yes	0	286	m	z	7	67
4	19	female	Mouth\em_fear_up_mouth.jpg	em	fear	yes	yes	1	213	m	m	6	66
4	19	female	Mouth\pe_fear_jumbled_mouth.jpg	pe	fear	no	yes	1	223	m	m	7	67
4	19	female	Mouth\pf_happy_up_mouth.jpg	pf	happy	yes	yes	0	184	m	z	7	67
4	19	female	Mouth\cc_fear_jumbled_mouth.jpg	cc	fear	no	yes	1	226	m	m	6	66
4	19	female	Mouth\mo_happy_up_mouth.jpg	mo	happy	yes	yes	1	227	m	m	7	67
4	19	female	Mouth\wf_happy_up_no_mouth.jpg	wf	happy	yes	no	1	259	z	z	6	66
4	19	female	Mouth\mf_fear_up_no_mouth.jpg	mf	fear	yes	no	1	274	z	z	6	66
4	19	female	Mouth\pf_fear_up_no_mouth.jpg	pf	fear	yes	no	1	265	z	z	7	67
4	19	female	Mouth\mf_happy_up_no_mouth.jpg	mf	happy	yes	no	1	232	z	z	7	67
4	19	female	Mouth\mf_happy_jumbled_no_mouth.jpg	mf	happy	no	no	1	441	z	z	6	66
4	19	female	Mouth\mf_happy_up_mouth.jpg	mf	happy	yes	yes	1	280	m	m	6	66
4	19	female	Mouth\em_happy_jumbled_no_mouth.jpg	em	happy	no	no	0	326	z	m	6	66
4	19	female	Mouth\mf_fear_up_mouth.jpg	mf	fear	yes	yes	0	307	m	z	7	67
4	19	female	Mouth\r_happy_jumbled_mouth.jpg	r_	happy	no	yes	1	128	m	m	7	67
4	19	female	Mouth\mo_happy_jumbled_no_mouth.jpg	mo	happy	no	no	0	302	z	m	7	67
4	19	female	Mouth\cc_fear_up_mouth.jpg	cc	fear	yes	yes	1	323	m	m	7	67
4	19	female	Mouth\wf_fear_up_no_mouth.jpg	wf	fear	yes	no	1	265	z	z	6	66
4	19	female	Mouth\pe_happy_up_mouth.jpg	pe	happy	yes	yes	1	192	m	m	7	67
4	19	female	Mouth\em_happy_jumbled_mouth.jpg	em	happy	no	yes	1	274	m	m	6	66
4	19	female	Mouth\pf_happy_jumbled_no_mouth.jpg	pf	happy	no	no	1	321	z	z	7	67
4	19	female	Mouth\jj_happy_jumbled_no_mouth.jpg	jj	happy	no	no	0	245	z	m	7	67
4	19	female	Mouth\sw_happy_up_no_mouth.jpg	sw	happy	yes	no	0	261	z	m	6	66
4	19	female	Mouth\pf_happy_jumbled_mouth.jpg	pf	happy	no	yes	0	236	m	z	7	67
4	19	female	Mouth\r_happy_up_mouth.jpg	r_	happy	yes	yes	1	181	m	m	7	67
4	19	female	Mouth\sw_fear_up_no_mouth.jpg	sw	fear	yes	no	1	385	z	z	7	67
4	19	female	Mouth\wf_happy_up_mouth.jpg	wf	happy	yes	yes	1	259	m	m	6	66
4	19	female	Mouth\jj_fear_up_no_mouth.jpg	jj	fear	yes	no	1	241	z	z	7	67
4	19	female	Mouth\sw_fear_jumbled_no_mouth.jpg	sw	fear	no	no	1	489	z	z	6	66
4	19	female	Mouth\pe_fear_up_no_mouth.jpg	pe	fear	yes	no	1	296	z	z	7	67
4	19	female	Mouth\wf_happy_jumbled_no_mouth.jpg	wf	happy	no	no	1	390	z	z	6	66
4	19	female	Mouth\em_fear_up_no_mouth.jpg	em	fear	yes	no	1	209	z	z	7	67
4	19	female	Mouth\pe_fear_up_mouth.jpg	pe	fear	yes	yes	1	210	m	m	6	66
4	19	female	Mouth\sw_happy_up_mouth.jpg	sw	happy	yes	yes	1	170	m	m	7	67
4	19	female	Mouth\pf_happy_up_no_mouth.jpg	pf	happy	yes	no	1	238	z	z	6	66
4	19	female	Mouth\sw_happy_jumbled_no_mouth.jpg	sw	happy	no	no	0	167	z	m	7	67
4	19	female	Mouth\jj_fear_jumbled_mouth.jpg	jj	fear	no	yes	1	201	m	m	6	66
4	19	female	Mouth\em_fear_jumbled_mouth.jpg	em	fear	no	yes	1	91	m	m	6	66
4	19	female	Mouth\em_happy_up_mouth.jpg	em	happy	yes	yes	1	361	m	m	7	67
4	19	female	Mouth\mo_fear_up_mouth.jpg	mo	fear	yes	yes	1	325	m	m	7	67
4	19	female	Mouth\r_fear_jumbled_mouth.jpg	r_	fear	no	yes	1	202	m	m	7	67
4	19	female	Mouth\jj_fear_up_mouth.jpg	jj	fear	yes	yes	1	172	m	m	7	67
4	19	female	Mouth\r_happy_up_no_mouth.jpg	r_	happy	yes	no	1	254	z	z	6	66
4	19	female	Mouth\mo_fear_up_no_mouth.jpg	mo	fear	yes	no	1	295	z	z	7	67
4	19	female	Mouth\cc_fear_jumbled_no_mouth.jpg	cc	fear	no	no	0	172	z	m	7	67
4	19	female	Mouth\jj_happy_jumbled_mouth.jpg	jj	happy	no	yes	1	183	m	m	7	67
4	19	female	Mouth\pf_fear_up_mouth.jpg	pf	fear	yes	yes	1	113	m	m	7	67
4	19	female	Mouth\pe_happy_jumbled_no_mouth.jpg	pe	happy	no	no	0	125	z	m	7	67
4	19	female	Mouth\jj_happy_jumbled_mouth.jpg	jj	happy	no	yes	1	350	m	m	7	67
4	19	female	Mouth\sw_happy_jumbled_no_mouth.jpg	sw	happy	no	no	0	130	z	m	7	67
4	19	female	Mouth\cc_happy_up_no_mouth.jpg	cc	happy	yes	no	0	406	z	m	6	66
4	19	female	Mouth\r_happy_jumbled_mouth.jpg	r_	happy	no	yes	1	144	m	m	6	66
4	19	female	Mouth\jj_fear_jumbled_no_mouth.jpg	jj	fear	no	no	0	292	z	m	7	67
4	19	female	Mouth\jj_happy_jumbled_no_mouth.jpg	jj	happy	no	no	1	322	z	z	7	67
4	19	female	Mouth\pf_happy_up_mouth.jpg	pf	happy	yes	yes	0	383	m	z	7	67
4	19	female	Mouth\em_fear_up_mouth.jpg	em	fear	yes	yes	1	298	m	m	6	66
4	19	female	Mouth\sw_happy_up_mouth.jpg	sw	happy	yes	yes	1	255	m	m	6	66
4	19	female	Mouth\pe_happy_up_mouth.jpg	pe	happy	yes	yes	1	232	m	m	7	67
4	19	female	Mouth\mo_happy_up_mouth.jpg	mo	happy	yes	yes	1	217	m	m	7	67
4	19	female	Mouth\mf_fear_jumbled_mouth.jpg	mf	fear	no	yes	1	250	m	m	6	66
4	19	female	Mouth\r_fear_jumbled_no_mouth.jpg	r_	fear	no	no	0	242	z	m	7	67
4	19	female	Mouth\r_happy_up_no_mouth.jpg	r_	happy	yes	no	1	297	z	z	6	66
4	19	female	Mouth\sw_fear_jumbled_no_mouth.jpg	sw	fear	no	no	1	151	z	z	7	67
4	19	female	Mouth\pe_happy_up_no_mouth.jpg	pe	happy	yes	no	0	147	z	m	7	67
4	19	female	Mouth\jj_happy_up_mouth.jpg	jj	happy	yes	yes	1	189	m	m	7	67
4	19	female	Mouth\mf_happy_up_no_mouth.jpg	mf	happy	yes	no	0	144	z	m	7	67
4	19	female	Mouth\cc_fear_jumbled_mouth.jpg	cc	fear	no	yes	1	323	m	m	6	66
4	19	female	Mouth\wf_fear_jumbled_no_mouth.jpg	wf	fear	no	no	0	255	z	m	7	67
4	19	female	Mouth\pf_fear_jumbled_no_mouth.jpg	pf	fear	no	no	1	367	z	z	7	67
4	19	female	Mouth\wf_fear_up_no_mouth.jpg	wf	fear	yes	no	1	234	z	z	7	67
4	19	female	Mouth\mo_fear_jumbled_no_mouth.jpg	mo	fear	no	no	1	290	z	z	7	67
4	19	female	Mouth\sw_happy_up_no_mouth.jpg	sw	happy	yes	no	1	249	z	z	7	67
4	19	female	Mouth\cc_fear_up_no_mouth.jpg	cc	fear	yes	no	1	193	z	z	7	67
4	19	female	Mouth\r_fear_up_no_mouth.jpg	r_	fear	yes	no	1	308	z	z	7	67
4	19	female	Mouth\cc_fear_up_mouth.jpg	cc	fear	yes	yes	0	202	m	z	6	66
4	19	female	Mouth\r_fear_up_mouth.jpg	r_	fear	yes	yes	0	251	m	z	7	67
4	19	female	Mouth\r_fear_jumbled_mouth.jpg	r_	fear	no	yes	1	195	m	m	7	67
4	19	female	Mouth\sw_happy_jumbled_mouth.jpg	sw	happy	no	yes	1	230	m	m	7	67
4	19	female	Mouth\jj_fear_jumbled_mouth.jpg	jj	fear	no	yes	1	238	m	m	7	67
4	19	female	Mouth\pe_happy_jumbled_mouth.jpg	pe	happy	no	yes	1	119	m	m	7	67
4	19	female	Mouth\wf_happy_up_mouth.jpg	wf	happy	yes	yes	0	332	m	z	7	67
4	19	female	Mouth\wf_fear_jumbled_mouth.jpg	wf	fear	no	yes	1	264	m	m	7	67
4	19	female	Mouth\em_happy_jumbled_mouth.jpg	em	happy	no	yes	1	192	m	m	7	67
4	19	female	Mouth\mo_fear_jumbled_mouth.jpg	mo	fear	no	yes	1	243	m	m	7	67
4	19	female	Mouth\sw_fear_up_no_mouth.jpg	sw	fear	yes	no	0	227	z	m	6	66
4	19	female	Mouth\pe_fear_up_mouth.jpg	pe	fear	yes	yes	1	227	m	m	7	67
4	19	female	Mouth\jj_happy_up_no_mouth.jpg	jj	happy	yes	no	0	283	z	m	6	66
4	19	female	Mouth\pe_fear_up_no_mouth.jpg	pe	fear	yes	no	1	290	z	z	7	67
4	19	female	Mouth\pf_fear_up_mouth.jpg	pf	fear	yes	yes	1	216	m	m	7	67
4	19	female	Mouth\em_fear_jumbled_mouth.jpg	em	fear	no	yes	1	145	m	m	7	67
4	19	female	Mouth\mo_happy_jumbled_mouth.jpg	mo	happy	no	yes	1	157	m	m	6	66
4	19	female	Mouth\wf_happy_jumbled_no_mouth.jpg	wf	happy	no	no	1	226	z	z	7	67
4	19	female	Mouth\pf_happy_jumbled_no_mouth.jpg	pf	happy	no	no	1	273	z	z	7	67
4	19	female	Mouth\mo_happy_up_no_mouth.jpg	mo	happy	yes	no	1	489	z	z	6	66
4	19	female	Mouth\wf_happy_up_no_mouth.jpg	wf	happy	yes	no	1	144	z	z	7	67
4	19	female	Mouth\wf_happy_jumbled_mouth.jpg	wf	happy	no	yes	1	252	m	m	6	66
4	19	female	Mouth\mf_fear_up_no_mouth.jpg	mf	fear	yes	no	1	259	z	z	7	67
4	19	female	Mouth\cc_happy_up_mouth.jpg	cc	happy	yes	yes	0	242	m	z	6	66
4	19	female	Mouth\pe_fear_jumbled_no_mouth.jpg	pe	fear	no	no	1	330	z	z	7	67
4	19	female	Mouth\mf_happy_jumbled_mouth.jpg	mf	happy	no	yes	1	214	m	m	7	67
4	19	female	Mouth\mf_fear_up_mouth.jpg	mf	fear	yes	yes	0	335	m	z	7	67
4	19	female	Mouth\cc_fear_jumbled_no_mouth.jpg	cc	fear	no	no	1	299	z	z	7	67
4	19	female	Mouth\jj_fear_up_no_mouth.jpg	jj	fear	yes	no	0	657	z	m	7	67
4	19	female	Mouth\pe_happy_jumbled_no_mouth.jpg	pe	happy	no	no	1	384	z	z	7	67
4	19	female	Mouth\pf_fear_up_no_mouth.jpg	pf	fear	yes	no	1	275	z	z	6	66
4	19	female	Mouth\em_happy_up_mouth.jpg	em	happy	yes	yes	0	473	m	z	6	66
4	19	female	Mouth\pf_happy_up_no_mouth.jpg	pf	happy	yes	no	1	249	z	z	6	66
4	19	female	Mouth\em_fear_jumbled_no_mouth.jpg	em	fear	no	no	1	176	z	z	7	67
4	19	female	Mouth\pe_fear_jumbled_mouth.jpg	pe	fear	no	yes	1	243	m	m	7	67
4	19	female	Mouth\em_fear_up_no_mouth.jpg	em	fear	yes	no	1	171	z	z	7	67
4	19	female	Mouth\sw_fear_up_mouth.jpg	sw	fear	yes	yes	0	286	m	z	7	67
4	19	female	Mouth\mo_fear_up_no_mouth.jpg	mo	fear	yes	no	1	253	z	z	6	66
4	19	female	Mouth\mf_happy_jumbled_no_mouth.jpg	mf	happy	no	no	1	293	z	z	7	67
4	19	female	Mouth\mf_happy_up_mouth.jpg	mf	happy	yes	yes	1	401	m	m	7	67
4	19	female	Mouth\r_happy_up_mouth.jpg	r_	happy	yes	yes	1	228	m	m	7	67
4	19	female	Mouth\pf_happy_jumbled_mouth.jpg	pf	happy	no	yes	0	380	m	z	7	67
4	19	female	Mouth\em_happy_jumbled_no_mouth.jpg	em	happy	no	no	1	406	z	z	6	66
4	19	female	Mouth\mf_fear_jumbled_no_mouth.jpg	mf	fear	no	no	1	280	z	z	6	66
4	19	female	Mouth\em_happy_up_no_mouth.jpg	em	happy	yes	no	1	319	z	z	7	67
4	19	female	Mouth\cc_happy_jumbled_no_mouth.jpg	cc	happy	no	no	1	284	z	z	7	67
4	19	female	Mouth\r_happy_jumbled_no_mouth.jpg	r_	happy	no	no	1	139	z	z	6	66
4	19	female	Mouth\mo_fear_up_mouth.jpg	mo	fear	yes	yes	1	351	m	m	7	67
4	19	female	Mouth\pf_fear_jumbled_mouth.jpg	pf	fear	no	yes	1	276	m	m	6	66
4	19	female	Mouth\sw_fear_jumbled_mouth.jpg	sw	fear	no	yes	1	146	m	m	7	67
4	19	female	Mouth\jj_fear_up_mouth.jpg	jj	fear	yes	yes	1	189	m	m	7	67
4	19	female	Mouth\wf_fear_up_mouth.jpg	wf	fear	yes	yes	1	368	m	m	7	67
4	19	female	Mouth\mo_happy_jumbled_no_mouth.jpg	mo	happy	no	no	0	412	z	m	6	66
4	19	female	Mouth\cc_happy_jumbled_mouth.jpg	cc	happy	no	yes	1	254	m	m	6	66
6	18	female	Mouth\jj_fear_up_no_mouth.jpg	jj	fear	yes	no	0	450	z	m	7	67
6	18	female	Mouth\pe_happy_up_mouth.jpg	pe	happy	yes	yes	1	319	m	m	6	66
6	18	female	Mouth\wf_fear_jumbled_no_mouth.jpg	wf	fear	no	no	0	191	z	m	7	67
6	18	female	Mouth\mo_fear_jumbled_mouth.jpg	mo	fear	no	yes	1	806	m	m	7	67
6	18	female	Mouth\cc_fear_up_mouth.jpg	cc	fear	yes	yes	1	230	m	m	6	66
6	18	female	Mouth\jj_fear_jumbled_no_mouth.jpg	jj	fear	no	no	0	279	z	m	7	67
6	18	female	Mouth\cc_happy_jumbled_no_mouth.jpg	cc	happy	no	no	1	294	z	z	7	67
6	18	female	Mouth\jj_fear_up_mouth.jpg	jj	fear	yes	yes	1	196	m	m	7	67
6	18	female	Mouth\wf_happy_jumbled_mouth.jpg	wf	happy	no	yes	1	101	m	m	7	67
6	18	female	Mouth\cc_happy_up_mouth.jpg	cc	happy	yes	yes	1	251	m	m	7	67
6	18	female	Mouth\wf_happy_jumbled_no_mouth.jpg	wf	happy	no	no	0	284	z	m	7	67
6	18	female	Mouth\pe_happy_up_no_mouth.jpg	pe	happy	yes	no	1	802	z	z	7	67
6	18	female	Mouth\pe_fear_jumbled_no_mouth.jpg	pe	fear	no	no	0	316	z	m	7	67
6	18	female	Mouth\jj_happy_up_no_mouth.jpg	jj	happy	yes	no	1	492	z	z	7	67
6	18	female	Mouth\jj_happy_up_mouth.jpg	jj	happy	yes	yes	1	290	m	m	7	67
6	18	female	Mouth\wf_happy_up_mouth.jpg	wf	happy	yes	yes	1	352	m	m	7	67
6	18	female	Mouth\pe_fear_up_no_mouth.jpg	pe	fear	yes	no	0	380	z	m	6	66
6	18	female	Mouth\mf_happy_up_mouth.jpg	mf	happy	yes	yes	1	261	m	m	7	67
6	18	female	Mouth\mf_happy_up_no_mouth.jpg	mf	happy	yes	no	0	549	z	m	7	67
6	18	female	Mouth\pf_fear_jumbled_mouth.jpg	pf	fear	no	yes	1	537	m	m	6	66
6	18	female	Mouth\sw_happy_up_mouth.jpg	sw	happy	yes	yes	1	333	m	m	6	66
6	18	female	Mouth\r_happy_jumbled_mouth.jpg	r_	happy	no	yes	1	242	m	m	7	67
6	18	female	Mouth\pe_happy_jumbled_no_mouth.jpg	pe	happy	no	no	0	705	z	m	6	66
6	18	female	Mouth\jj_happy_jumbled_no_mouth.jpg	jj	happy	no	no	1	383	z	z	7	67
6	18	female	Mouth\sw_fear_up_mouth.jpg	sw	fear	yes	yes	1	609	m	m	6	66
6	18	female	Mouth\em_happy_jumbled_mouth.jpg	em	happy	no	yes	1	450	m	m	7	67
6	18	female	Mouth\jj_fear_jumbled_mouth.jpg	jj	fear	no	yes	1	258	m	m	7	67
6	18	female	Mouth\pf_fear_jumbled_no_mouth.jpg	pf	fear	no	no	1	593	z	z	7	67
6	18	female	Mouth\sw_happy_up_no_mouth.jpg	sw	happy	yes	no	1	451	z	z	7	67
6	18	female	Mouth\sw_fear_jumbled_mouth.jpg	sw	fear	no	yes	1	307	m	m	7	67
6	18	female	Mouth\r_fear_jumbled_no_mouth.jpg	r_	fear	no	no	1	465	z	z	7	67
6	18	female	Mouth\wf_fear_up_mouth.jpg	wf	fear	yes	yes	1	504	m	m	7	67
6	18	female	Mouth\mf_fear_up_mouth.jpg	mf	fear	yes	yes	0	510	m	z	7	67
6	18	female	Mouth\r_happy_up_no_mouth.jpg	r_	happy	yes	no	1	547	z	z	6	66
6	18	female	Mouth\wf_happy_up_no_mouth.jpg	wf	happy	yes	no	1	255	z	z	6	66
6	18	female	Mouth\r_happy_jumbled_no_mouth.jpg	r_	happy	no	no	1	247	z	z	7	67
6	18	female	Mouth\em_happy_up_no_mouth.jpg	em	happy	yes	no	1	399	z	z	7	67
6	18	female	Mouth\mo_happy_up_no_mouth.jpg	mo	happy	yes	no	1	290	z	z	7	67
6	18	female	Mouth\mf_fear_jumbled_mouth.jpg	mf	fear	no	yes	1	384	m	m	7	67
6	18	female	Mouth\r_fear_up_mouth.jpg	r_	fear	yes	yes	1	419	m	m	6	66
6	18	female	Mouth\em_happy_jumbled_no_mouth.jpg	em	happy	no	no	0	396	z	m	7	67
6	18	female	Mouth\em_happy_up_mouth.jpg	em	happy	yes	yes	1	254	m	m	7	67
6	18	female	Mouth\r_fear_jumbled_mouth.jpg	r_	fear	no	yes	1	286	m	m	7	67
6	18	female	Mouth\pf_happy_jumbled_no_mouth.jpg	pf	happy	no	no	1	907	z	z	7	67
6	18	female	Mouth\pf_happy_up_mouth.jpg	pf	happy	yes	yes	1	529	m	m	7	67
6	18	female	Mouth\mo_happy_jumbled_no_mouth.jpg	mo	happy	no	no	1	478	z	z	6	66
6	18	female	Mouth\mo_fear_up_no_mouth.jpg	mo	fear	yes	no	1	1045	z	z	7	67
6	18	female	Mouth\pf_fear_up_mouth.jpg	pf	fear	yes	yes	1	357	m	m	7	67
6	18	female	Mouth\sw_happy_jumbled_no_mouth.jpg	sw	happy	no	no	0	273	z	m	7	67
6	18	female	Mouth\pf_fear_up_no_mouth.jpg	pf	fear	yes	no	0	288	z	m	6	66
6	18	female	Mouth\mf_fear_up_no_mouth.jpg	mf	fear	yes	no	0	270	z	m	7	67
6	18	female	Mouth\cc_happy_jumbled_mouth.jpg	cc	happy	no	yes	1	406	m	m	6	66
6	18	female	Mouth\em_fear_jumbled_no_mouth.jpg	em	fear	no	no	0	367	z	m	7	67
6	18	female	Mouth\cc_happy_up_no_mouth.jpg	cc	happy	yes	no	1	483	z	z	7	67
6	18	female	Mouth\pf_happy_jumbled_mouth.jpg	pf	happy	no	yes	1	313	m	m	7	67
6	18	female	Mouth\sw_fear_up_no_mouth.jpg	sw	fear	yes	no	0	383	z	m	6	66
6	18	female	Mouth\sw_fear_jumbled_no_mouth.jpg	sw	fear	no	no	1	458	z	z	7	67
6	18	female	Mouth\cc_fear_jumbled_no_mouth.jpg	cc	fear	no	no	0	377	z	m	6	66
6	18	female	Mouth\mf_fear_jumbled_no_mouth.jpg	mf	fear	no	no	1	394	z	z	7	67
6	18	female	Mouth\cc_fear_up_no_mouth.jpg	cc	fear	yes	no	1	285	z	z	6	66
6	18	female	Mouth\mf_happy_jumbled_no_mouth.jpg	mf	happy	no	no	1	404	z	z	7	67
6	18	female	Mouth\cc_fear_jumbled_mouth.jpg	cc	fear	no	yes	0	333	m	z	7	67
6	18	female	Mouth\em_fear_jumbled_mouth.jpg	em	fear	no	yes	1	337	m	m	7	67
6	18	female	Mouth\wf_fear_up_no_mouth.jpg	wf	fear	yes	no	0	325	z	m	6	66
6	18	female	Mouth\pe_happy_jumbled_mouth.jpg	pe	happy	no	yes	1	330	m	m	7	67
6	18	female	Mouth\r_fear_up_no_mouth.jpg	r_	fear	yes	no	1	792	z	z	7	67
6	18	female	Mouth\pe_fear_jumbled_mouth.jpg	pe	fear	no	yes	1	330	m	m	7	67
6	18	female	Mouth\mo_fear_jumbled_no_mouth.jpg	mo	fear	no	no	0	287	z	m	7	67
6	18	female	Mouth\wf_fear_jumbled_mouth.jpg	wf	fear	no	yes	1	381	m	m	7	67
6	18	female	Mouth\r_happy_up_mouth.jpg	r_	happy	yes	yes	1	609	m	m	7	67
6	18	female	Mouth\em_fear_up_no_mouth.jpg	em	fear	yes	no	1	482	z	z	7	67
6	18	female	Mouth\pe_fear_up_mouth.jpg	pe	fear	yes	yes	1	496	m	m	7	67
6	18	female	Mouth\pf_happy_up_no_mouth.jpg	pf	happy	yes	no	0	399	z	m	6	66
6	18	female	Mouth\mo_fear_up_mouth.jpg	mo	fear	yes	yes	0	625	m	z	6	66
6	18	female	Mouth\em_fear_up_mouth.jpg	em	fear	yes	yes	1	394	m	m	6	66
6	18	female	Mouth\jj_happy_jumbled_mouth.jpg	jj	happy	no	yes	1	316	m	m	6	66
6	18	female	Mouth\mo_happy_up_mouth.jpg	mo	happy	yes	yes	1	378	m	m	6	66
6	18	female	Mouth\sw_happy_jumbled_mouth.jpg	sw	happy	no	yes	1	324	m	m	6	66
6	18	female	Mouth\mf_happy_jumbled_mouth.jpg	mf	happy	no	yes	1	345	m	m	7	67
6	18	female	Mouth\mo_happy_jumbled_mouth.jpg	mo	happy	no	yes	1	302	m	m	6	66
6	18	female	Mouth\sw_fear_up_mouth.jpg	sw	fear	yes	yes	1	1480	m	m	6	66
6	18	female	Mouth\cc_happy_jumbled_mouth.jpg	cc	happy	no	yes	1	392	m	m	7	67
6	18	female	Mouth\mf_happy_jumbled_mouth.jpg	mf	happy	no	yes	1	289	m	m	7	67
6	18	female	Mouth\r_happy_up_mouth.jpg	r_	happy	yes	yes	1	393	m	m	7	67
6	18	female	Mouth\r_fear_jumbled_mouth.jpg	r_	fear	no	yes	1	163	m	m	7	67
6	18	female	Mouth\pe_happy_jumbled_mouth.jpg	pe	happy	no	yes	1	246	m	m	7	67
6	18	female	Mouth\em_fear_up_mouth.jpg	em	fear	yes	yes	1	191	m	m	7	67
6	18	female	Mouth\sw_fear_up_no_mouth.jpg	sw	fear	yes	no	1	193	z	z	6	66
6	18	female	Mouth\r_fear_up_no_mouth.jpg	r_	fear	yes	no	1	507	z	z	7	67
6	18	female	Mouth\em_happy_jumbled_mouth.jpg	em	happy	no	yes	1	329	m	m	7	67
6	18	female	Mouth\sw_happy_jumbled_mouth.jpg	sw	happy	no	yes	1	230	m	m	7	67
6	18	female	Mouth\pf_fear_jumbled_mouth.jpg	pf	fear	no	yes	1	399	m	m	6	66
6	18	female	Mouth\r_happy_up_no_mouth.jpg	r_	happy	yes	no	1	368	z	z	7	67
6	18	female	Mouth\r_happy_jumbled_mouth.jpg	r_	happy	no	yes	1	379	m	m	7	67
6	18	female	Mouth\mo_happy_up_mouth.jpg	mo	happy	yes	yes	1	943	m	m	7	67
6	18	female	Mouth\cc_fear_up_no_mouth.jpg	cc	fear	yes	no	0	275	z	m	7	67
6	18	female	Mouth\mf_fear_jumbled_no_mouth.jpg	mf	fear	no	no	1	242	z	z	6	66
6	18	female	Mouth\pf_fear_up_no_mouth.jpg	pf	fear	yes	no	1	330	z	z	7	67
6	18	female	Mouth\pe_happy_up_no_mouth.jpg	pe	happy	yes	no	1	294	z	z	7	67
6	18	female	Mouth\cc_happy_jumbled_no_mouth.jpg	cc	happy	no	no	0	404	z	m	6	66
6	18	female	Mouth\pf_happy_jumbled_no_mouth.jpg	pf	happy	no	no	1	189	z	z	7	67
6	18	female	Mouth\cc_fear_jumbled_no_mouth.jpg	cc	fear	no	no	1	391	z	z	6	66
6	18	female	Mouth\r_fear_up_mouth.jpg	r_	fear	yes	yes	0	634	m	z	7	67
6	18	female	Mouth\mf_happy_up_no_mouth.jpg	mf	happy	yes	no	0	314	z	m	7	67
6	18	female	Mouth\pe_fear_jumbled_no_mouth.jpg	pe	fear	no	no	1	488	z	z	7	67
6	18	female	Mouth\jj_fear_up_no_mouth.jpg	jj	fear	yes	no	1	462	z	z	7	67
6	18	female	Mouth\r_fear_jumbled_no_mouth.jpg	r_	fear	no	no	0	612	z	m	7	67
6	18	female	Mouth\wf_fear_up_no_mouth.jpg	wf	fear	yes	no	0	908	z	m	7	67
6	18	female	Mouth\mo_fear_up_no_mouth.jpg	mo	fear	yes	no	1	354	z	z	6	66
6	18	female	Mouth\jj_fear_jumbled_mouth.jpg	jj	fear	no	yes	1	773	m	m	6	66
6	18	female	Mouth\pf_happy_up_mouth.jpg	pf	happy	yes	yes	1	336	m	m	7	67
6	18	female	Mouth\cc_fear_up_mouth.jpg	cc	fear	yes	yes	1	324	m	m	7	67
6	18	female	Mouth\mo_fear_up_mouth.jpg	mo	fear	yes	yes	1	897	m	m	7	67
6	18	female	Mouth\em_fear_jumbled_mouth.jpg	em	fear	no	yes	0	463	m	z	6	66
6	18	female	Mouth\jj_happy_up_mouth.jpg	jj	happy	yes	yes	1	766	m	m	6	66
6	18	female	Mouth\mf_happy_up_mouth.jpg	mf	happy	yes	yes	1	2186	m	m	7	67
6	18	female	Mouth\wf_fear_jumbled_mouth.jpg	wf	fear	no	yes	1	286	m	m	7	67
6	18	female	Mouth\em_happy_up_no_mouth.jpg	em	happy	yes	no	1	405	z	z	7	67
6	18	female	Mouth\mo_happy_jumbled_mouth.jpg	mo	happy	no	yes	1	223	m	m	7	67
6	18	female	Mouth\cc_happy_up_mouth.jpg	cc	happy	yes	yes	1	385	m	m	6	66
6	18	female	Mouth\sw_fear_jumbled_no_mouth.jpg	sw	fear	no	no	1	299	z	z	7	67
6	18	female	Mouth\wf_happy_jumbled_mouth.jpg	wf	happy	no	yes	1	328	m	m	6	66
6	18	female	Mouth\wf_happy_up_no_mouth.jpg	wf	happy	yes	no	1	388	z	z	7	67
6	18	female	Mouth\pe_fear_jumbled_mouth.jpg	pe	fear	no	yes	1	320	m	m	7	67
6	18	female	Mouth\pf_happy_jumbled_mouth.jpg	pf	happy	no	yes	1	357	m	m	6	66
6	18	female	Mouth\mo_happy_jumbled_no_mouth.jpg	mo	happy	no	no	1	321	z	z	7	67
6	18	female	Mouth\pe_happy_jumbled_no_mouth.jpg	pe	happy	no	no	0	415	z	m	7	67
6	18	female	Mouth\wf_fear_jumbled_no_mouth.jpg	wf	fear	no	no	0	359	z	m	6	66
6	18	female	Mouth\wf_happy_up_mouth.jpg	wf	happy	yes	yes	1	506	m	m	7	67
6	18	female	Mouth\pe_fear_up_no_mouth.jpg	pe	fear	yes	no	1	584	z	z	7	67
6	18	female	Mouth\cc_happy_up_no_mouth.jpg	cc	happy	yes	no	1	379	z	z	6	66
6	18	female	Mouth\em_happy_up_mouth.jpg	em	happy	yes	yes	0	414	m	z	7	67
6	18	female	Mouth\pf_fear_jumbled_no_mouth.jpg	pf	fear	no	no	1	535	z	z	7	67
6	18	female	Mouth\pe_fear_up_mouth.jpg	pe	fear	yes	yes	1	307	m	m	7	67
6	18	female	Mouth\pe_happy_up_mouth.jpg	pe	happy	yes	yes	1	234	m	m	7	67
6	18	female	Mouth\jj_fear_jumbled_no_mouth.jpg	jj	fear	no	no	0	278	z	m	6	66
6	18	female	Mouth\mf_fear_up_no_mouth.jpg	mf	fear	yes	no	0	413	z	m	7	67
6	18	female	Mouth\mf_fear_jumbled_mouth.jpg	mf	fear	no	yes	1	390	m	m	7	67
6	18	female	Mouth\cc_fear_jumbled_mouth.jpg	cc	fear	no	yes	1	359	m	m	7	67
6	18	female	Mouth\sw_fear_jumbled_mouth.jpg	sw	fear	no	yes	1	265	m	m	7	67
6	18	female	Mouth\pf_fear_up_mouth.jpg	pf	fear	yes	yes	1	152	m	m	7	67
6	18	female	Mouth\mf_fear_up_mouth.jpg	mf	fear	yes	yes	1	332	m	m	7	67
6	18	female	Mouth\sw_happy_jumbled_no_mouth.jpg	sw	happy	no	no	1	464	z	z	6	66
6	18	female	Mouth\mf_happy_jumbled_no_mouth.jpg	mf	happy	no	no	1	679	z	z	7	67
6	18	female	Mouth\r_happy_jumbled_no_mouth.jpg	r_	happy	no	no	1	622	z	z	6	66
6	18	female	Mouth\mo_happy_up_no_mouth.jpg	mo	happy	yes	no	1	688	z	z	6	66
6	18	female	Mouth\em_fear_jumbled_no_mouth.jpg	em	fear	no	no	1	590	z	z	6	66
6	18	female	Mouth\mo_fear_jumbled_mouth.jpg	mo	fear	no	yes	1	305	m	m	7	67
6	18	female	Mouth\mo_fear_jumbled_no_mouth.jpg	mo	fear	no	no	0	327	z	m	6	66
6	18	female	Mouth\jj_fear_up_mouth.jpg	jj	fear	yes	yes	1	324	m	m	7	67
6	18	female	Mouth\jj_happy_up_no_mouth.jpg	jj	happy	yes	no	1	377	z	z	7	67
6	18	female	Mouth\sw_happy_up_no_mouth.jpg	sw	happy	yes	no	1	435	z	z	7	67
6	18	female	Mouth\sw_happy_up_mouth.jpg	sw	happy	yes	yes	1	235	m	m	7	67
6	18	female	Mouth\jj_happy_jumbled_mouth.jpg	jj	happy	no	yes	1	332	m	m	7	67
6	18	female	Mouth\wf_happy_jumbled_no_mouth.jpg	wf	happy	no	no	0	457	z	m	6	66
6	18	female	Mouth\wf_fear_up_mouth.jpg	wf	fear	yes	yes	1	506	m	m	7	67
6	18	female	Mouth\pf_happy_up_no_mouth.jpg	pf	happy	yes	no	1	599	z	z	6	66
6	18	female	Mouth\em_happy_jumbled_no_mouth.jpg	em	happy	no	no	0	722	z	m	7	67
6	18	female	Mouth\jj_happy_jumbled_no_mouth.jpg	jj	happy	no	no	1	342	z	z	7	67
6	18	female	Mouth\em_fear_up_no_mouth.jpg	em	fear	yes	no	1	578	z	z	7	67
6	18	female	Mouth\pf_fear_jumbled_no_mouth.jpg	pf	fear	no	no	1	411	z	z	6	66
6	18	female	Mouth\mo_fear_jumbled_mouth.jpg	mo	fear	no	yes	1	437	m	m	7	67
6	18	female	Mouth\mo_happy_jumbled_mouth.jpg	mo	happy	no	yes	1	246	m	m	6	66
6	18	female	Mouth\wf_fear_jumbled_no_mouth.jpg	wf	fear	no	no	1	533	z	z	6	66
6	18	female	Mouth\cc_fear_jumbled_no_mouth.jpg	cc	fear	no	no	1	424	z	z	6	66
6	18	female	Mouth\sw_fear_jumbled_no_mouth.jpg	sw	fear	no	no	0	505	z	m	7	67
6	18	female	Mouth\cc_happy_jumbled_no_mouth.jpg	cc	happy	no	no	0	415	z	m	7	67
6	18	female	Mouth\pe_happy_up_no_mouth.jpg	pe	happy	yes	no	1	376	z	z	6	66
6	18	female	Mouth\pf_fear_jumbled_mouth.jpg	pf	fear	no	yes	1	395	m	m	6	66
6	18	female	Mouth\mo_fear_up_mouth.jpg	mo	fear	yes	yes	0	381	m	z	6	66
6	18	female	Mouth\cc_happy_up_no_mouth.jpg	cc	happy	yes	no	1	480	z	z	7	67
6	18	female	Mouth\jj_happy_up_no_mouth.jpg	jj	happy	yes	no	1	294	z	z	6	66
6	18	female	Mouth\r_happy_jumbled_no_mouth.jpg	r_	happy	no	no	1	428	z	z	6	66
6	18	female	Mouth\wf_fear_up_no_mouth.jpg	wf	fear	yes	no	1	324	z	z	6	66
6	18	female	Mouth\jj_happy_jumbled_no_mouth.jpg	jj	happy	no	no	1	320	z	z	7	67
6	18	female	Mouth\wf_happy_up_no_mouth.jpg	wf	happy	yes	no	1	302	z	z	7	67
6	18	female	Mouth\mf_fear_up_no_mouth.jpg	mf	fear	yes	no	0	580	z	m	7	67
6	18	female	Mouth\pe_fear_jumbled_mouth.jpg	pe	fear	no	yes	1	239	m	m	7	67
6	18	female	Mouth\em_fear_up_mouth.jpg	em	fear	yes	yes	1	280	m	m	6	66
6	18	female	Mouth\em_fear_jumbled_no_mouth.jpg	em	fear	no	no	1	590	z	z	7	67
6	18	female	Mouth\mf_fear_jumbled_no_mouth.jpg	mf	fear	no	no	1	280	z	z	7	67
6	18	female	Mouth\sw_happy_up_mouth.jpg	sw	happy	yes	yes	1	430	m	m	7	67
6	18	female	Mouth\em_fear_up_no_mouth.jpg	em	fear	yes	no	1	399	z	z	7	67
6	18	female	Mouth\em_happy_jumbled_mouth.jpg	em	happy	no	yes	1	352	m	m	7	67
6	18	female	Mouth\pf_happy_jumbled_no_mouth.jpg	pf	happy	no	no	1	411	z	z	6	66
6	18	female	Mouth\r_happy_up_mouth.jpg	r_	happy	yes	yes	1	413	m	m	7	67
6	18	female	Mouth\pe_fear_jumbled_no_mouth.jpg	pe	fear	no	no	1	438	z	z	6	66
6	18	female	Mouth\sw_fear_up_mouth.jpg	sw	fear	yes	yes	1	375	m	m	7	67
6	18	female	Mouth\mf_fear_up_mouth.jpg	mf	fear	yes	yes	0	385	m	z	6	66
6	18	female	Mouth\r_fear_up_mouth.jpg	r_	fear	yes	yes	0	916	m	z	7	67
6	18	female	Mouth\pf_happy_up_mouth.jpg	pf	happy	yes	yes	1	417	m	m	6	66
6	18	female	Mouth\jj_fear_up_no_mouth.jpg	jj	fear	yes	no	1	354	z	z	7	67
6	18	female	Mouth\em_fear_jumbled_mouth.jpg	em	fear	no	yes	1	430	m	m	7	67
6	18	female	Mouth\pe_fear_up_mouth.jpg	pe	fear	yes	yes	1	350	m	m	6	66
6	18	female	Mouth\cc_fear_up_no_mouth.jpg	cc	fear	yes	no	0	323	z	m	7	67
6	18	female	Mouth\wf_fear_up_mouth.jpg	wf	fear	yes	yes	1	369	m	m	7	67
6	18	female	Mouth\cc_happy_jumbled_mouth.jpg	cc	happy	no	yes	1	532	m	m	7	67
6	18	female	Mouth\cc_fear_up_mouth.jpg	cc	fear	yes	yes	1	528	m	m	7	67
6	18	female	Mouth\pf_happy_up_no_mouth.jpg	pf	happy	yes	no	0	422	z	m	7	67
6	18	female	Mouth\pf_happy_jumbled_mouth.jpg	pf	happy	no	yes	0	815	m	z	6	66
6	18	female	Mouth\mo_happy_jumbled_no_mouth.jpg	mo	happy	no	no	1	649	z	z	6	66
6	18	female	Mouth\cc_fear_jumbled_mouth.jpg	cc	fear	no	yes	1	311	m	m	7	67
6	18	female	Mouth\wf_happy_jumbled_no_mouth.jpg	wf	happy	no	no	0	396	z	m	7	67
6	18	female	Mouth\r_fear_jumbled_no_mouth.jpg	r_	fear	no	no	1	486	z	z	7	67
6	18	female	Mouth\pe_happy_jumbled_no_mouth.jpg	pe	happy	no	no	1	397	z	z	6	66
6	18	female	Mouth\pf_fear_up_no_mouth.jpg	pf	fear	yes	no	1	343	z	z	7	67
6	18	female	Mouth\pe_happy_up_mouth.jpg	pe	happy	yes	yes	1	467	m	m	7	67
6	18	female	Mouth\pe_happy_jumbled_mouth.jpg	pe	happy	no	yes	1	323	m	m	7	67
6	18	female	Mouth\mf_happy_jumbled_no_mouth.jpg	mf	happy	no	no	1	368	z	z	7	67
6	18	female	Mouth\jj_happy_up_mouth.jpg	jj	happy	yes	yes	1	820	m	m	7	67
6	18	female	Mouth\r_fear_up_no_mouth.jpg	r_	fear	yes	no	0	646	z	m	7	67
6	18	female	Mouth\mo_happy_up_no_mouth.jpg	mo	happy	yes	no	1	390	z	z	7	67
6	18	female	Mouth\jj_happy_jumbled_mouth.jpg	jj	happy	no	yes	1	433	m	m	6	66
6	18	female	Mouth\wf_happy_jumbled_mouth.jpg	wf	happy	no	yes	1	697	m	m	7	67
6	18	female	Mouth\sw_fear_up_no_mouth.jpg	sw	fear	yes	no	0	560	z	m	7	67
6	18	female	Mouth\sw_fear_jumbled_mouth.jpg	sw	fear	no	yes	1	546	m	m	7	67
6	18	female	Mouth\mf_fear_jumbled_mouth.jpg	mf	fear	no	yes	1	445	m	m	7	67
6	18	female	Mouth\r_fear_jumbled_mouth.jpg	r_	fear	no	yes	1	445	m	m	7	67
6	18	female	Mouth\cc_happy_up_mouth.jpg	cc	happy	yes	yes	1	397	m	m	6	66
6	18	female	Mouth\em_happy_up_no_mouth.jpg	em	happy	yes	no	1	559	z	z	7	67
6	18	female	Mouth\mo_happy_up_mouth.jpg	mo	happy	yes	yes	1	315	m	m	7	67
6	18	female	Mouth\mf_happy_up_no_mouth.jpg	mf	happy	yes	no	0	233	z	m	7	67
6	18	female	Mouth\sw_happy_up_no_mouth.jpg	sw	happy	yes	no	0	289	z	m	6	66
6	18	female	Mouth\jj_fear_jumbled_no_mouth.jpg	jj	fear	no	no	1	480	z	z	7	67
6	18	female	Mouth\wf_fear_jumbled_mouth.jpg	wf	fear	no	yes	1	399	m	m	6	66
6	18	female	Mouth\em_happy_up_mouth.jpg	em	happy	yes	yes	1	409	m	m	7	67
6	18	female	Mouth\jj_fear_up_mouth.jpg	jj	fear	yes	yes	1	572	m	m	7	67
6	18	female	Mouth\jj_fear_jumbled_mouth.jpg	jj	fear	no	yes	1	294	m	m	7	67
6	18	female	Mouth\mf_happy_jumbled_mouth.jpg	mf	happy	no	yes	1	340	m	m	6	66
6	18	female	Mouth\r_happy_jumbled_mouth.jpg	r_	happy	no	yes	1	305	m	m	7	67
6	18	female	Mouth\sw_happy_jumbled_no_mouth.jpg	sw	happy	no	no	1	703	z	z	7	67
6	18	female	Mouth\pe_fear_up_no_mouth.jpg	pe	fear	yes	no	1	557	z	z	7	67
6	18	female	Mouth\em_happy_jumbled_no_mouth.jpg	em	happy	no	no	1	625	z	z	6	66
6	18	female	Mouth\pf_fear_up_mouth.jpg	pf	fear	yes	yes	1	377	m	m	6	66
6	18	female	Mouth\mo_fear_jumbled_no_mouth.jpg	mo	fear	no	no	0	396	z	m	7	67
6	18	female	Mouth\mo_fear_up_no_mouth.jpg	mo	fear	yes	no	1	437	z	z	7	67
6	18	female	Mouth\r_happy_up_no_mouth.jpg	r_	happy	yes	no	1	413	z	z	6	66
6	18	female	Mouth\wf_happy_up_mouth.jpg	wf	happy	yes	yes	1	470	m	m	7	67
6	18	female	Mouth\mf_happy_up_mouth.jpg	mf	happy	yes	yes	1	1049	m	m	7	67
6	18	female	Mouth\sw_happy_jumbled_mouth.jpg	sw	happy	no	yes	1	338	m	m	7	67
6	18	female	Mouth\wf_happy_up_mouth.jpg	wf	happy	yes	yes	1	506	m	m	7	67
6	18	female	Mouth\r_fear_jumbled_no_mouth.jpg	r_	fear	no	no	0	239	z	m	7	67
6	18	female	Mouth\cc_fear_jumbled_mouth.jpg	cc	fear	no	yes	1	415	m	m	7	67
6	18	female	Mouth\mo_fear_up_mouth.jpg	mo	fear	yes	yes	1	232	m	m	7	67
6	18	female	Mouth\wf_happy_up_no_mouth.jpg	wf	happy	yes	no	1	264	z	z	7	67
6	18	female	Mouth\mf_fear_jumbled_mouth.jpg	mf	fear	no	yes	1	344	m	m	7	67
6	18	female	Mouth\jj_fear_up_mouth.jpg	jj	fear	yes	yes	0	330	m	z	7	67
6	18	female	Mouth\jj_happy_jumbled_no_mouth.jpg	jj	happy	no	no	0	630	z	m	7	67
6	18	female	Mouth\jj_happy_up_no_mouth.jpg	jj	happy	yes	no	1	343	z	z	6	66
6	18	female	Mouth\r_happy_up_mouth.jpg	r_	happy	yes	yes	1	211	m	m	7	67
6	18	female	Mouth\wf_happy_jumbled_mouth.jpg	wf	happy	no	yes	1	316	m	m	6	66
6	18	female	Mouth\em_happy_up_no_mouth.jpg	em	happy	yes	no	1	330	z	z	7	67
6	18	female	Mouth\em_happy_jumbled_no_mouth.jpg	em	happy	no	no	1	695	z	z	6	66
6	18	female	Mouth\cc_fear_up_mouth.jpg	cc	fear	yes	yes	1	356	m	m	7	67
6	18	female	Mouth\mf_fear_jumbled_no_mouth.jpg	mf	fear	no	no	1	344	z	z	6	66
6	18	female	Mouth\r_happy_jumbled_no_mouth.jpg	r_	happy	no	no	1	604	z	z	6	66
6	18	female	Mouth\pf_happy_jumbled_no_mouth.jpg	pf	happy	no	no	1	941	z	z	7	67
6	18	female	Mouth\wf_fear_up_mouth.jpg	wf	fear	yes	yes	1	314	m	m	6	66
6	18	female	Mouth\mf_happy_jumbled_mouth.jpg	mf	happy	no	yes	1	503	m	m	7	67
6	18	female	Mouth\em_happy_up_mouth.jpg	em	happy	yes	yes	1	293	m	m	7	67
6	18	female	Mouth\mo_fear_jumbled_no_mouth.jpg	mo	fear	no	no	1	491	z	z	6	66
6	18	female	Mouth\mf_fear_up_mouth.jpg	mf	fear	yes	yes	0	746	m	z	7	67
6	18	female	Mouth\pf_happy_jumbled_mouth.jpg	pf	happy	no	yes	0	774	m	z	7	67
6	18	female	Mouth\mo_happy_up_no_mouth.jpg	mo	happy	yes	no	1	377	z	z	7	67
6	18	female	Mouth\cc_fear_up_no_mouth.jpg	cc	fear	yes	no	1	396	z	z	6	66
6	18	female	Mouth\cc_fear_jumbled_no_mouth.jpg	cc	fear	no	no	1	317	z	z	7	67
6	18	female	Mouth\pf_fear_up_mouth.jpg	pf	fear	yes	yes	1	425	m	m	6	66
6	18	female	Mouth\em_fear_jumbled_no_mouth.jpg	em	fear	no	no	0	345	z	m	6	66
6	18	female	Mouth\mo_happy_jumbled_no_mouth.jpg	mo	happy	no	no	1	406	z	z	7	67
6	18	female	Mouth\sw_fear_up_no_mouth.jpg	sw	fear	yes	no	0	464	z	m	6	66
6	18	female	Mouth\mo_happy_jumbled_mouth.jpg	mo	happy	no	yes	1	352	m	m	6	66
6	18	female	Mouth\mo_fear_jumbled_mouth.jpg	mo	fear	no	yes	1	381	m	m	7	67
6	18	female	Mouth\pe_fear_up_mouth.jpg	pe	fear	yes	yes	1	671	m	m	6	66
6	18	female	Mouth\pe_fear_jumbled_no_mouth.jpg	pe	fear	no	no	1	662	z	z	7	67
6	18	female	Mouth\wf_fear_up_no_mouth.jpg	wf	fear	yes	no	1	333	z	z	6	66
6	18	female	Mouth\pe_fear_up_no_mouth.jpg	pe	fear	yes	no	1	658	z	z	7	67
6	18	female	Mouth\mf_happy_jumbled_no_mouth.jpg	mf	happy	no	no	1	626	z	z	7	67
6	18	female	Mouth\jj_fear_jumbled_mouth.jpg	jj	fear	no	yes	1	1034	m	m	7	67
6	18	female	Mouth\sw_fear_up_mouth.jpg	sw	fear	yes	yes	1	298	m	m	7	67
6	18	female	Mouth\em_fear_up_no_mouth.jpg	em	fear	yes	no	1	512	z	z	7	67
6	18	female	Mouth\pf_happy_up_mouth.jpg	pf	happy	yes	yes	0	629	m	z	7	67
6	18	female	Mouth\wf_happy_jumbled_no_mouth.jpg	wf	happy	no	no	0	598	z	m	7	67
6	18	female	Mouth\r_happy_up_no_mouth.jpg	r_	happy	yes	no	1	1199	z	z	6	66
6	18	female	Mouth\em_fear_up_mouth.jpg	em	fear	yes	yes	1	434	m	m	6	66
6	18	female	Mouth\r_fear_jumbled_mouth.jpg	r_	fear	no	yes	1	1003	m	m	7	67
6	18	female	Mouth\pe_fear_jumbled_mouth.jpg	pe	fear	no	yes	1	413	m	m	7	67
6	18	female	Mouth\sw_fear_jumbled_no_mouth.jpg	sw	fear	no	no	1	463	z	z	7	67
6	18	female	Mouth\pf_happy_up_no_mouth.jpg	pf	happy	yes	no	0	295	z	m	7	67
6	18	female	Mouth\pf_fear_up_no_mouth.jpg	pf	fear	yes	no	0	380	z	m	7	67
6	18	female	Mouth\pf_fear_jumbled_mouth.jpg	pf	fear	no	yes	1	480	m	m	7	67
6	18	female	Mouth\sw_happy_jumbled_mouth.jpg	sw	happy	no	yes	1	343	m	m	7	67
6	18	female	Mouth\mf_happy_up_no_mouth.jpg	mf	happy	yes	no	1	395	z	z	7	67
6	18	female	Mouth\mo_happy_up_mouth.jpg	mo	happy	yes	yes	1	357	m	m	7	67
6	18	female	Mouth\mf_happy_up_mouth.jpg	mf	happy	yes	yes	1	352	m	m	7	67
6	18	female	Mouth\em_happy_jumbled_mouth.jpg	em	happy	no	yes	1	412	m	m	7	67
6	18	female	Mouth\mo_fear_up_no_mouth.jpg	mo	fear	yes	no	1	398	z	z	7	67
6	18	female	Mouth\pe_happy_jumbled_mouth.jpg	pe	happy	no	yes	0	848	m	z	6	66
6	18	female	Mouth\cc_happy_jumbled_no_mouth.jpg	cc	happy	no	no	0	383	z	m	6	66
6	18	female	Mouth\sw_fear_jumbled_mouth.jpg	sw	fear	no	yes	1	361	m	m	6	66
6	18	female	Mouth\jj_happy_up_mouth.jpg	jj	happy	yes	yes	1	340	m	m	7	67
6	18	female	Mouth\pe_happy_up_mouth.jpg	pe	happy	yes	yes	1	442	m	m	7	67
6	18	female	Mouth\sw_happy_up_mouth.jpg	sw	happy	yes	yes	1	313	m	m	7	67
6	18	female	Mouth\pe_happy_jumbled_no_mouth.jpg	pe	happy	no	no	0	622	z	m	6	66
6	18	female	Mouth\mf_fear_up_no_mouth.jpg	mf	fear	yes	no	1	879	z	z	7	67
6	18	female	Mouth\r_fear_up_no_mouth.jpg	r_	fear	yes	no	1	695	z	z	7	67
6	18	female	Mouth\wf_fear_jumbled_mouth.jpg	wf	fear	no	yes	0	757	m	z	7	67
6	18	female	Mouth\cc_happy_jumbled_mouth.jpg	cc	happy	no	yes	1	353	m	m	7	67
6	18	female	Mouth\wf_fear_jumbled_no_mouth.jpg	wf	fear	no	no	1	428	z	z	6	66
6	18	female	Mouth\jj_fear_up_no_mouth.jpg	jj	fear	yes	no	1	740	z	z	7	67
6	18	female	Mouth\cc_happy_up_mouth.jpg	cc	happy	yes	yes	0	337	m	z	6	66
6	18	female	Mouth\em_fear_jumbled_mouth.jpg	em	fear	no	yes	0	446	m	z	7	67
6	18	female	Mouth\r_fear_up_mouth.jpg	r_	fear	yes	yes	1	558	m	m	7	67
6	18	female	Mouth\cc_happy_up_no_mouth.jpg	cc	happy	yes	no	1	362	z	z	7	67
6	18	female	Mouth\jj_fear_jumbled_no_mouth.jpg	jj	fear	no	no	1	636	z	z	7	67
6	18	female	Mouth\r_happy_jumbled_mouth.jpg	r_	happy	no	yes	1	277	m	m	6	66
6	18	female	Mouth\jj_happy_jumbled_mouth.jpg	jj	happy	no	yes	1	292	m	m	7	67
6	18	female	Mouth\pf_fear_jumbled_no_mouth.jpg	pf	fear	no	no	1	410	z	z	7	67
6	18	female	Mouth\pe_happy_up_no_mouth.jpg	pe	happy	yes	no	1	555	z	z	7	67
6	18	female	Mouth\sw_happy_jumbled_no_mouth.jpg	sw	happy	no	no	1	391	z	z	7	67
6	18	female	Mouth\sw_happy_up_no_mouth.jpg	sw	happy	yes	no	0	505	z	m	6	66
3	19	female	Mouth\pf_fear_up_no_mouth.jpg	pf	fear	yes	no	0	503	m	z	6	66
3	19	female	Mouth\sw_happy_jumbled_mouth.jpg	sw	happy	no	yes	1	354	z	z	7	67
3	19	female	Mouth\wf_happy_jumbled_no_mouth.jpg	wf	happy	no	no	0	331	m	z	7	67
3	19	female	Mouth\pf_fear_jumbled_mouth.jpg	pf	fear	no	yes	1	349	z	z	7	67
3	19	female	Mouth\cc_fear_up_no_mouth.jpg	cc	fear	yes	no	0	438	m	z	7	67
3	19	female	Mouth\wf_fear_jumbled_no_mouth.jpg	wf	fear	no	no	1	337	m	m	7	67
3	19	female	Mouth\mf_fear_up_mouth.jpg	mf	fear	yes	yes	0	297	z	m	7	67
3	19	female	Mouth\sw_happy_up_no_mouth.jpg	sw	happy	yes	no	1	420	m	m	7	67
3	19	female	Mouth\em_happy_jumbled_mouth.jpg	em	happy	no	yes	1	338	z	z	6	66
3	19	female	Mouth\wf_happy_up_no_mouth.jpg	wf	happy	yes	no	1	323	m	m	7	67
3	19	female	Mouth\sw_fear_up_mouth.jpg	sw	fear	yes	yes	1	275	z	z	6	66
3	19	female	Mouth\r_fear_up_no_mouth.jpg	r_	fear	yes	no	1	438	m	m	7	67
3	19	female	Mouth\pf_happy_up_no_mouth.jpg	pf	happy	yes	no	0	345	m	z	6	66
3	19	female	Mouth\jj_fear_jumbled_no_mouth.jpg	jj	fear	no	no	0	294	m	z	7	67
3	19	female	Mouth\mf_happy_up_mouth.jpg	mf	happy	yes	yes	1	178	z	z	7	67
3	19	female	Mouth\em_fear_jumbled_no_mouth.jpg	em	fear	no	no	1	436	m	m	6	66
3	19	female	Mouth\em_fear_jumbled_mouth.jpg	em	fear	no	yes	1	373	z	z	7	67
3	19	female	Mouth\mf_fear_jumbled_no_mouth.jpg	mf	fear	no	no	1	344	m	m	6	66
3	19	female	Mouth\em_happy_jumbled_no_mouth.jpg	em	happy	no	no	1	275	m	m	7	67
3	19	female	Mouth\jj_fear_jumbled_mouth.jpg	jj	fear	no	yes	1	321	z	z	6	66
3	19	female	Mouth\wf_happy_jumbled_mouth.jpg	wf	happy	no	yes	1	318	z	z	7	67
3	19	female	Mouth\mf_happy_jumbled_mouth.jpg	mf	happy	no	yes	1	219	z	z	6	66
3	19	female	Mouth\r_happy_jumbled_mouth.jpg	r_	happy	no	yes	1	220	z	z	6	66
3	19	female	Mouth\wf_fear_up_no_mouth.jpg	wf	fear	yes	no	1	277	m	m	7	67
3	19	female	Mouth\cc_happy_jumbled_no_mouth.jpg	cc	happy	no	no	0	235	m	z	6	66
3	19	female	Mouth\pe_fear_jumbled_no_mouth.jpg	pe	fear	no	no	1	323	m	m	7	67
3	19	female	Mouth\mf_happy_up_no_mouth.jpg	mf	happy	yes	no	1	288	m	m	7	67
3	19	female	Mouth\pe_happy_up_mouth.jpg	pe	happy	yes	yes	1	343	z	z	6	66
3	19	female	Mouth\sw_happy_up_mouth.jpg	sw	happy	yes	yes	1	194	z	z	7	67
3	19	female	Mouth\sw_fear_jumbled_mouth.jpg	sw	fear	no	yes	1	211	z	z	7	67
3	19	female	Mouth\jj_happy_jumbled_no_mouth.jpg	jj	happy	no	no	1	292	m	m	6	66
3	19	female	Mouth\r_happy_up_mouth.jpg	r_	happy	yes	yes	1	291	z	z	7	67
3	19	female	Mouth\pf_fear_up_mouth.jpg	pf	fear	yes	yes	0	360	z	m	7	67
3	19	female	Mouth\mo_happy_up_no_mouth.jpg	mo	happy	yes	no	1	308	m	m	7	67
3	19	female	Mouth\r_fear_jumbled_no_mouth.jpg	r_	fear	no	no	0	282	m	z	7	67
3	19	female	Mouth\pf_happy_up_mouth.jpg	pf	happy	yes	yes	1	192	z	z	6	66
3	19	female	Mouth\mo_happy_jumbled_no_mouth.jpg	mo	happy	no	no	1	379	m	m	7	67
3	19	female	Mouth\mo_happy_jumbled_mouth.jpg	mo	happy	no	yes	1	222	z	z	7	67
3	19	female	Mouth\cc_fear_jumbled_no_mouth.jpg	cc	fear	no	no	1	462	m	m	7	67
3	19	female	Mouth\jj_happy_up_mouth.jpg	jj	happy	yes	yes	0	342	z	m	7	67
3	19	female	Mouth\jj_happy_jumbled_mouth.jpg	jj	happy	no	yes	1	273	z	z	7	67
3	19	female	Mouth\jj_fear_up_mouth.jpg	jj	fear	yes	yes	1	369	z	z	7	67
3	19	female	Mouth\pe_fear_up_mouth.jpg	pe	fear	yes	yes	0	884	z	m	6	66
3	19	female	Mouth\pe_happy_jumbled_no_mouth.jpg	pe	happy	no	no	0	363	m	z	7	67
3	19	female	Mouth\cc_happy_up_mouth.jpg	cc	happy	yes	yes	1	332	z	z	7	67
3	19	female	Mouth\sw_fear_up_no_mouth.jpg	sw	fear	yes	no	0	409	m	z	7	67
3	19	female	Mouth\pe_happy_jumbled_mouth.jpg	pe	happy	no	yes	1	475	z	z	7	67
3	19	female	Mouth\mf_fear_up_no_mouth.jpg	mf	fear	yes	no	1	338	m	m	6	66
3	19	female	Mouth\wf_happy_up_mouth.jpg	wf	happy	yes	yes	0	375	z	m	7	67
3	19	female	Mouth\mf_happy_jumbled_no_mouth.jpg	mf	happy	no	no	1	345	m	m	6	66
3	19	female	Mouth\em_fear_up_no_mouth.jpg	em	fear	yes	no	1	229	m	m	6	66
3	19	female	Mouth\mo_fear_jumbled_mouth.jpg	mo	fear	no	yes	0	438	z	m	7	67
3	19	female	Mouth\pf_happy_jumbled_no_mouth.jpg	pf	happy	no	no	1	358	m	m	6	66
3	19	female	Mouth\mo_fear_up_no_mouth.jpg	mo	fear	yes	no	1	538	m	m	6	66
3	19	female	Mouth\cc_fear_jumbled_mouth.jpg	cc	fear	no	yes	1	414	z	z	6	66
3	19	female	Mouth\mo_fear_jumbled_no_mouth.jpg	mo	fear	no	no	0	423	m	z	7	67
3	19	female	Mouth\wf_fear_jumbled_mouth.jpg	wf	fear	no	yes	1	337	z	z	7	67
3	19	female	Mouth\mo_happy_up_mouth.jpg	mo	happy	yes	yes	1	438	z	z	7	67
3	19	female	Mouth\mo_fear_up_mouth.jpg	mo	fear	yes	yes	1	542	z	z	7	67
3	19	female	Mouth\em_happy_up_mouth.jpg	em	happy	yes	yes	1	306	z	z	7	67
3	19	female	Mouth\jj_fear_up_no_mouth.jpg	jj	fear	yes	no	1	296	m	m	7	67
3	19	female	Mouth\wf_fear_up_mouth.jpg	wf	fear	yes	yes	0	526	z	m	6	66
3	19	female	Mouth\sw_fear_jumbled_no_mouth.jpg	sw	fear	no	no	1	395	m	m	7	67
3	19	female	Mouth\jj_happy_up_no_mouth.jpg	jj	happy	yes	no	1	340	m	m	7	67
3	19	female	Mouth\pe_fear_jumbled_mouth.jpg	pe	fear	no	yes	1	465	z	z	7	67
3	19	female	Mouth\em_fear_up_mouth.jpg	em	fear	yes	yes	1	273	z	z	7	67
3	19	female	Mouth\r_happy_jumbled_no_mouth.jpg	r_	happy	no	no	0	312	m	z	6	66
3	19	female	Mouth\cc_happy_up_no_mouth.jpg	cc	happy	yes	no	0	357	m	z	6	66
3	19	female	Mouth\sw_happy_jumbled_no_mouth.jpg	sw	happy	no	no	1	753	m	m	6	66
3	19	female	Mouth\cc_fear_up_mouth.jpg	cc	fear	yes	yes	1	364	z	z	7	67
3	19	female	Mouth\r_fear_up_mouth.jpg	r_	fear	yes	yes	0	296	z	m	7	67
3	19	female	Mouth\r_happy_up_no_mouth.jpg	r_	happy	yes	no	1	301	m	m	7	67
3	19	female	Mouth\pf_fear_jumbled_no_mouth.jpg	pf	fear	no	no	1	395	m	m	7	67
3	19	female	Mouth\r_fear_jumbled_mouth.jpg	r_	fear	no	yes	1	285	z	z	7	67
3	19	female	Mouth\pf_happy_jumbled_mouth.jpg	pf	happy	no	yes	0	283	z	m	6	66
3	19	female	Mouth\pe_happy_up_no_mouth.jpg	pe	happy	yes	no	1	418	m	m	7	67
3	19	female	Mouth\cc_happy_jumbled_mouth.jpg	cc	happy	no	yes	1	500	z	z	7	67
3	19	female	Mouth\pe_fear_up_no_mouth.jpg	pe	fear	yes	no	0	497	m	z	7	67
3	19	female	Mouth\em_happy_up_no_mouth.jpg	em	happy	yes	no	1	224	m	m	6	66
3	19	female	Mouth\mf_fear_jumbled_mouth.jpg	mf	fear	no	yes	1	297	z	z	6	66
3	19	female	Mouth\em_fear_up_no_mouth.jpg	em	fear	yes	no	0	307	m	z	6	66
3	19	female	Mouth\cc_fear_up_no_mouth.jpg	cc	fear	yes	no	0	466	m	z	7	67
3	19	female	Mouth\mo_happy_up_no_mouth.jpg	mo	happy	yes	no	1	490	m	m	7	67
3	19	female	Mouth\mf_happy_up_no_mouth.jpg	mf	happy	yes	no	1	280	m	m	6	66
3	19	female	Mouth\jj_happy_up_no_mouth.jpg	jj	happy	yes	no	1	199	m	m	7	67
3	19	female	Mouth\mo_happy_up_mouth.jpg	mo	happy	yes	yes	1	297	z	z	6	66
3	19	female	Mouth\wf_happy_up_mouth.jpg	wf	happy	yes	yes	1	287	z	z	6	66
3	19	female	Mouth\pf_happy_jumbled_no_mouth.jpg	pf	happy	no	no	1	261	m	m	7	67
3	19	female	Mouth\em_happy_up_mouth.jpg	em	happy	yes	yes	1	252	z	z	6	66
3	19	female	Mouth\mf_fear_up_mouth.jpg	mf	fear	yes	yes	0	252	z	m	7	67
3	19	female	Mouth\r_fear_up_no_mouth.jpg	r_	fear	yes	no	1	284	m	m	7	67
3	19	female	Mouth\pe_fear_up_no_mouth.jpg	pe	fear	yes	no	0	259	m	z	7	67
3	19	female	Mouth\jj_happy_jumbled_mouth.jpg	jj	happy	no	yes	1	274	z	z	6	66
3	19	female	Mouth\jj_happy_jumbled_no_mouth.jpg	jj	happy	no	no	1	321	m	m	7	67
3	19	female	Mouth\pe_fear_up_mouth.jpg	pe	fear	yes	yes	1	302	z	z	7	67
3	19	female	Mouth\mo_happy_jumbled_no_mouth.jpg	mo	happy	no	no	0	420	m	z	6	66
3	19	female	Mouth\pf_fear_up_mouth.jpg	pf	fear	yes	yes	0	325	z	m	7	67
3	19	female	Mouth\r_fear_up_mouth.jpg	r_	fear	yes	yes	1	378	z	z	6	66
3	19	female	Mouth\wf_happy_jumbled_mouth.jpg	wf	happy	no	yes	1	323	z	z	7	67
3	19	female	Mouth\pe_fear_jumbled_mouth.jpg	pe	fear	no	yes	1	336	z	z	6	66
3	19	female	Mouth\pf_happy_jumbled_mouth.jpg	pf	happy	no	yes	1	597	z	z	7	67
3	19	female	Mouth\cc_fear_up_mouth.jpg	cc	fear	yes	yes	0	278	z	m	6	66
3	19	female	Mouth\sw_fear_up_mouth.jpg	sw	fear	yes	yes	1	524	z	z	7	67
3	19	female	Mouth\r_fear_jumbled_no_mouth.jpg	r_	fear	no	no	0	329	m	z	6	66
3	19	female	Mouth\wf_fear_up_no_mouth.jpg	wf	fear	yes	no	1	413	m	m	6	66
3	19	female	Mouth\mo_fear_up_no_mouth.jpg	mo	fear	yes	no	1	303	m	m	7	67
3	19	female	Mouth\em_happy_up_no_mouth.jpg	em	happy	yes	no	1	309	m	m	7	67
3	19	female	Mouth\cc_fear_jumbled_mouth.jpg	cc	fear	no	yes	1	554	z	z	7	67
3	19	female	Mouth\pf_fear_up_no_mouth.jpg	pf	fear	yes	no	0	342	m	z	7	67
3	19	female	Mouth\wf_fear_jumbled_mouth.jpg	wf	fear	no	yes	1	250	z	z	7	67
3	19	female	Mouth\mf_fear_jumbled_no_mouth.jpg	mf	fear	no	no	1	394	m	m	7	67
3	19	female	Mouth\jj_fear_jumbled_mouth.jpg	jj	fear	no	yes	1	379	z	z	7	67
3	19	female	Mouth\cc_fear_jumbled_no_mouth.jpg	cc	fear	no	no	1	373	m	m	7	67
3	19	female	Mouth\sw_happy_up_no_mouth.jpg	sw	happy	yes	no	1	344	m	m	7	67
3	19	female	Mouth\em_fear_up_mouth.jpg	em	fear	yes	yes	1	332	z	z	7	67
3	19	female	Mouth\em_happy_jumbled_no_mouth.jpg	em	happy	no	no	1	320	m	m	7	67
3	19	female	Mouth\jj_fear_up_mouth.jpg	jj	fear	yes	yes	1	564	z	z	7	67
3	19	female	Mouth\sw_fear_jumbled_no_mouth.jpg	sw	fear	no	no	1	288	m	m	7	67
3	19	female	Mouth\sw_fear_up_no_mouth.jpg	sw	fear	yes	no	0	383	m	z	6	66
3	19	female	Mouth\jj_happy_up_mouth.jpg	jj	happy	yes	yes	1	577	z	z	7	67
3	19	female	Mouth\sw_happy_jumbled_mouth.jpg	sw	happy	no	yes	1	557	z	z	7	67
3	19	female	Mouth\sw_happy_jumbled_no_mouth.jpg	sw	happy	no	no	1	369	m	m	7	67
3	19	female	Mouth\r_happy_jumbled_no_mouth.jpg	r_	happy	no	no	0	500	m	z	6	66
3	19	female	Mouth\wf_fear_up_mouth.jpg	wf	fear	yes	yes	0	395	z	m	7	67
3	19	female	Mouth\mf_happy_jumbled_no_mouth.jpg	mf	happy	no	no	1	340	m	m	7	67
3	19	female	Mouth\mo_happy_jumbled_mouth.jpg	mo	happy	no	yes	1	306	z	z	7	67
3	19	female	Mouth\mf_fear_up_no_mouth.jpg	mf	fear	yes	no	0	511	m	z	7	67
3	19	female	Mouth\pe_happy_up_no_mouth.jpg	pe	happy	yes	no	1	373	m	m	7	67
3	19	female	Mouth\r_happy_up_mouth.jpg	r_	happy	yes	yes	1	305	z	z	7	67
3	19	female	Mouth\r_fear_jumbled_mouth.jpg	r_	fear	no	yes	1	390	z	z	7	67
3	19	female	Mouth\em_fear_jumbled_mouth.jpg	em	fear	no	yes	1	417	z	z	6	66
3	19	female	Mouth\cc_happy_jumbled_mouth.jpg	cc	happy	no	yes	1	419	z	z	6	66
3	19	female	Mouth\mo_fear_up_mouth.jpg	mo	fear	yes	yes	0	364	z	m	6	66
3	19	female	Mouth\mo_fear_jumbled_mouth.jpg	mo	fear	no	yes	1	528	z	z	6	66
3	19	female	Mouth\r_happy_up_no_mouth.jpg	r_	happy	yes	no	1	204	m	m	6	66
3	19	female	Mouth\pe_happy_up_mouth.jpg	pe	happy	yes	yes	1	485	z	z	7	67
3	19	female	Mouth\r_happy_jumbled_mouth.jpg	r_	happy	no	yes	1	300	z	z	6	66
3	19	female	Mouth\em_happy_jumbled_mouth.jpg	em	happy	no	yes	1	298	z	z	7	67
3	19	female	Mouth\pf_happy_up_mouth.jpg	pf	happy	yes	yes	1	472	z	z	7	67
3	19	female	Mouth\cc_happy_up_mouth.jpg	cc	happy	yes	yes	0	302	z	m	7	67
3	19	female	Mouth\mf_fear_jumbled_mouth.jpg	mf	fear	no	yes	1	516	z	z	6	66
3	19	female	Mouth\pe_fear_jumbled_no_mouth.jpg	pe	fear	no	no	1	297	m	m	7	67
3	19	female	Mouth\wf_happy_jumbled_no_mouth.jpg	wf	happy	no	no	0	264	m	z	6	66
3	19	female	Mouth\jj_fear_jumbled_no_mouth.jpg	jj	fear	no	no	0	248	m	z	7	67
3	19	female	Mouth\pe_happy_jumbled_mouth.jpg	pe	happy	no	yes	1	288	z	z	7	67
3	19	female	Mouth\mf_happy_up_mouth.jpg	mf	happy	yes	yes	1	237	z	z	7	67
3	19	female	Mouth\em_fear_jumbled_no_mouth.jpg	em	fear	no	no	0	581	m	z	7	67
3	19	female	Mouth\jj_fear_up_no_mouth.jpg	jj	fear	yes	no	1	319	m	m	7	67
3	19	female	Mouth\sw_happy_up_mouth.jpg	sw	happy	yes	yes	1	284	z	z	7	67
3	19	female	Mouth\pf_happy_up_no_mouth.jpg	pf	happy	yes	no	0	403	m	z	6	66
3	19	female	Mouth\wf_fear_jumbled_no_mouth.jpg	wf	fear	no	no	0	404	m	z	6	66
3	19	female	Mouth\pf_fear_jumbled_mouth.jpg	pf	fear	no	yes	1	983	z	z	7	67
3	19	female	Mouth\wf_happy_up_no_mouth.jpg	wf	happy	yes	no	1	1145	m	m	7	67
3	19	female	Mouth\cc_happy_up_no_mouth.jpg	cc	happy	yes	no	0	445	m	z	7	67
3	19	female	Mouth\mo_fear_jumbled_no_mouth.jpg	mo	fear	no	no	0	405	m	z	7	67
3	19	female	Mouth\mf_happy_jumbled_mouth.jpg	mf	happy	no	yes	1	319	z	z	7	67
3	19	female	Mouth\pf_fear_jumbled_no_mouth.jpg	pf	fear	no	no	1	244	m	m	7	67
3	19	female	Mouth\pe_happy_jumbled_no_mouth.jpg	pe	happy	no	no	0	276	m	z	7	67
3	19	female	Mouth\cc_happy_jumbled_no_mouth.jpg	cc	happy	no	no	0	314	m	z	6	66
3	19	female	Mouth\sw_fear_jumbled_mouth.jpg	sw	fear	no	yes	1	327	z	z	7	67
3	19	female	Mouth\sw_fear_jumbled_mouth.jpg	sw	fear	no	yes	1	300	z	z	7	67
3	19	female	Mouth\wf_happy_jumbled_mouth.jpg	wf	happy	no	yes	1	442	z	z	7	67
3	19	female	Mouth\mf_happy_jumbled_no_mouth.jpg	mf	happy	no	no	1	250	m	m	7	67
3	19	female	Mouth\sw_fear_up_mouth.jpg	sw	fear	yes	yes	1	385	z	z	7	67
3	19	female	Mouth\pe_fear_jumbled_no_mouth.jpg	pe	fear	no	no	1	259	m	m	6	66
3	19	female	Mouth\mo_happy_jumbled_mouth.jpg	mo	happy	no	yes	1	211	z	z	6	66
3	19	female	Mouth\mf_fear_jumbled_mouth.jpg	mf	fear	no	yes	0	779	z	m	6	66
3	19	female	Mouth\mf_happy_jumbled_mouth.jpg	mf	happy	no	yes	1	254	z	z	6	66
3	19	female	Mouth\cc_happy_up_mouth.jpg	cc	happy	yes	yes	1	469	z	z	6	66
3	19	female	Mouth\mf_fear_up_mouth.jpg	mf	fear	yes	yes	0	372	z	m	7	67
3	19	female	Mouth\r_fear_up_no_mouth.jpg	r_	fear	yes	no	1	312	m	m	6	66
3	19	female	Mouth\em_happy_jumbled_mouth.jpg	em	happy	no	yes	1	285	z	z	7	67
3	19	female	Mouth\sw_happy_up_mouth.jpg	sw	happy	yes	yes	1	307	z	z	7	67
3	19	female	Mouth\jj_happy_up_mouth.jpg	jj	happy	yes	yes	1	249	z	z	6	66
3	19	female	Mouth\pf_happy_up_no_mouth.jpg	pf	happy	yes	no	1	338	m	m	7	67
3	19	female	Mouth\pf_fear_jumbled_mouth.jpg	pf	fear	no	yes	1	247	z	z	7	67
3	19	female	Mouth\cc_fear_up_no_mouth.jpg	cc	fear	yes	no	0	271	m	z	7	67
3	19	female	Mouth\mf_happy_up_mouth.jpg	mf	happy	yes	yes	1	365	z	z	6	66
3	19	female	Mouth\pe_happy_up_no_mouth.jpg	pe	happy	yes	no	1	328	m	m	7	67
3	19	female	Mouth\r_happy_jumbled_mouth.jpg	r_	happy	no	yes	1	261	z	z	7	67
3	19	female	Mouth\em_happy_up_no_mouth.jpg	em	happy	yes	no	1	317	m	m	7	67
3	19	female	Mouth\pf_fear_up_mouth.jpg	pf	fear	yes	yes	1	505	z	z	7	67
3	19	female	Mouth\pe_fear_up_mouth.jpg	pe	fear	yes	yes	1	351	z	z	6	66
3	19	female	Mouth\pe_fear_up_no_mouth.jpg	pe	fear	yes	no	0	323	m	z	6	66
3	19	female	Mouth\sw_happy_jumbled_no_mouth.jpg	sw	happy	no	no	1	448	m	m	6	66
3	19	female	Mouth\pe_fear_jumbled_mouth.jpg	pe	fear	no	yes	1	329	z	z	7	67
3	19	female	Mouth\mo_happy_jumbled_no_mouth.jpg	mo	happy	no	no	0	253	m	z	6	66
3	19	female	Mouth\sw_fear_jumbled_no_mouth.jpg	sw	fear	no	no	1	309	m	m	7	67
3	19	female	Mouth\jj_fear_jumbled_no_mouth.jpg	jj	fear	no	no	0	371	m	z	7	67
3	19	female	Mouth\pf_happy_up_mouth.jpg	pf	happy	yes	yes	1	246	z	z	6	66
3	19	female	Mouth\cc_fear_up_mouth.jpg	cc	fear	yes	yes	1	205	z	z	6	66
3	19	female	Mouth\em_happy_jumbled_no_mouth.jpg	em	happy	no	no	1	390	m	m	6	66
3	19	female	Mouth\wf_fear_jumbled_no_mouth.jpg	wf	fear	no	no	1	592	m	m	6	66
3	19	female	Mouth\mo_happy_up_no_mouth.jpg	mo	happy	yes	no	1	363	m	m	7	67
3	19	female	Mouth\pf_fear_up_no_mouth.jpg	pf	fear	yes	no	0	246	m	z	6	66
3	19	female	Mouth\wf_happy_up_no_mouth.jpg	wf	happy	yes	no	1	334	m	m	7	67
3	19	female	Mouth\wf_fear_jumbled_mouth.jpg	wf	fear	no	yes	1	298	z	z	7	67
3	19	female	Mouth\em_happy_up_mouth.jpg	em	happy	yes	yes	1	456	z	z	6	66
3	19	female	Mouth\pf_happy_jumbled_no_mouth.jpg	pf	happy	no	no	1	327	m	m	7	67
3	19	female	Mouth\mf_fear_up_no_mouth.jpg	mf	fear	yes	no	0	276	m	z	6	66
3	19	female	Mouth\em_fear_jumbled_no_mouth.jpg	em	fear	no	no	0	322	m	z	7	67
3	19	female	Mouth\mf_fear_jumbled_no_mouth.jpg	mf	fear	no	no	1	311	m	m	6	66
3	19	female	Mouth\mo_fear_jumbled_no_mouth.jpg	mo	fear	no	no	1	348	m	m	6	66
3	19	female	Mouth\mo_fear_jumbled_mouth.jpg	mo	fear	no	yes	0	657	z	m	7	67
3	19	female	Mouth\em_fear_up_no_mouth.jpg	em	fear	yes	no	1	409	m	m	7	67
3	19	female	Mouth\pe_happy_jumbled_no_mouth.jpg	pe	happy	no	no	0	537	m	z	6	66
3	19	female	Mouth\mo_fear_up_no_mouth.jpg	mo	fear	yes	no	1	286	m	m	6	66
3	19	female	Mouth\r_happy_up_no_mouth.jpg	r_	happy	yes	no	1	396	m	m	6	66
3	19	female	Mouth\mf_happy_up_no_mouth.jpg	mf	happy	yes	no	1	550	m	m	6	66
3	19	female	Mouth\cc_happy_jumbled_mouth.jpg	cc	happy	no	yes	1	411	z	z	7	67
3	19	female	Mouth\r_fear_jumbled_no_mouth.jpg	r_	fear	no	no	0	300	m	z	7	67
3	19	female	Mouth\r_happy_up_mouth.jpg	r_	happy	yes	yes	1	258	z	z	7	67
3	19	female	Mouth\jj_happy_jumbled_no_mouth.jpg	jj	happy	no	no	1	313	m	m	6	66
3	19	female	Mouth\cc_fear_jumbled_mouth.jpg	cc	fear	no	yes	1	510	z	z	6	66
3	19	female	Mouth\wf_fear_up_no_mouth.jpg	wf	fear	yes	no	1	267	m	m	7	67
3	19	female	Mouth\pe_happy_up_mouth.jpg	pe	happy	yes	yes	1	586	z	z	7	67
3	19	female	Mouth\em_fear_up_mouth.jpg	em	fear	yes	yes	1	350	z	z	7	67
3	19	female	Mouth\jj_fear_up_mouth.jpg	jj	fear	yes	yes	1	346	z	z	7	67
3	19	female	Mouth\cc_happy_up_no_mouth.jpg	cc	happy	yes	no	0	333	m	z	7	67
3	19	female	Mouth\mo_happy_up_mouth.jpg	mo	happy	yes	yes	1	227	z	z	7	67
3	19	female	Mouth\cc_happy_jumbled_no_mouth.jpg	cc	happy	no	no	0	331	m	z	6	66
3	19	female	Mouth\r_fear_jumbled_mouth.jpg	r_	fear	no	yes	1	440	z	z	7	67
3	19	female	Mouth\jj_happy_up_no_mouth.jpg	jj	happy	yes	no	1	312	m	m	7	67
3	19	female	Mouth\sw_happy_up_no_mouth.jpg	sw	happy	yes	no	1	469	m	m	7	67
3	19	female	Mouth\sw_fear_up_no_mouth.jpg	sw	fear	yes	no	0	460	m	z	7	67
3	19	female	Mouth\jj_fear_jumbled_mouth.jpg	jj	fear	no	yes	1	499	z	z	6	66
3	19	female	Mouth\wf_happy_up_mouth.jpg	wf	happy	yes	yes	0	345	z	m	7	67
3	19	female	Mouth\wf_happy_jumbled_no_mouth.jpg	wf	happy	no	no	0	605	m	z	7	67
3	19	female	Mouth\mo_fear_up_mouth.jpg	mo	fear	yes	yes	1	711	z	z	7	67
3	19	female	Mouth\pe_happy_jumbled_mouth.jpg	pe	happy	no	yes	1	397	z	z	7	67
3	19	female	Mouth\pf_fear_jumbled_no_mouth.jpg	pf	fear	no	no	1	279	m	m	7	67
3	19	female	Mouth\sw_happy_jumbled_mouth.jpg	sw	happy	no	yes	1	358	z	z	7	67
3	19	female	Mouth\r_happy_jumbled_no_mouth.jpg	r_	happy	no	no	1	354	m	m	7	67
3	19	female	Mouth\wf_fear_up_mouth.jpg	wf	fear	yes	yes	0	406	z	m	6	66
3	19	female	Mouth\jj_fear_up_no_mouth.jpg	jj	fear	yes	no	1	367	m	m	7	67
3	19	female	Mouth\jj_happy_jumbled_mouth.jpg	jj	happy	no	yes	1	323	z	z	7	67
3	19	female	Mouth\cc_fear_jumbled_no_mouth.jpg	cc	fear	no	no	1	311	m	m	6	66
3	19	female	Mouth\em_fear_jumbled_mouth.jpg	em	fear	no	yes	1	524	z	z	7	67
3	19	female	Mouth\pf_happy_jumbled_mouth.jpg	pf	happy	no	yes	0	354	z	m	7	67
3	19	female	Mouth\r_fear_up_mouth.jpg	r_	fear	yes	yes	0	382	z	m	7	67
3	19	female	Mouth\pf_fear_up_no_mouth.jpg	pf	fear	yes	no	0	358	m	z	7	67
3	19	female	Mouth\mo_happy_up_no_mouth.jpg	mo	happy	yes	no	1	258	m	m	6	66
3	19	female	Mouth\cc_happy_jumbled_no_mouth.jpg	cc	happy	no	no	0	177	m	z	7	67
3	19	female	Mouth\em_fear_up_mouth.jpg	em	fear	yes	yes	1	244	z	z	7	67
3	19	female	Mouth\wf_happy_up_mouth.jpg	wf	happy	yes	yes	1	1100	z	z	6	66
3	19	female	Mouth\wf_fear_jumbled_mouth.jpg	wf	fear	no	yes	1	370	z	z	7	67
3	19	female	Mouth\sw_fear_up_no_mouth.jpg	sw	fear	yes	no	1	542	m	m	7	67
3	19	female	Mouth\mf_fear_jumbled_mouth.jpg	mf	fear	no	yes	0	362	z	m	6	66
3	19	female	Mouth\em_happy_jumbled_mouth.jpg	em	happy	no	yes	1	269	z	z	7	67
3	19	female	Mouth\pe_fear_jumbled_mouth.jpg	pe	fear	no	yes	1	253	z	z	7	67
3	19	female	Mouth\pf_fear_up_mouth.jpg	pf	fear	yes	yes	0	652	z	m	7	67
3	19	female	Mouth\wf_happy_jumbled_mouth.jpg	wf	happy	no	yes	1	332	z	z	7	67
3	19	female	Mouth\pf_fear_jumbled_mouth.jpg	pf	fear	no	yes	1	345	z	z	6	66
3	19	female	Mouth\jj_happy_jumbled_mouth.jpg	jj	happy	no	yes	1	277	z	z	7	67
3	19	female	Mouth\sw_fear_up_mouth.jpg	sw	fear	yes	yes	0	307	z	m	7	67
3	19	female	Mouth\sw_fear_jumbled_no_mouth.jpg	sw	fear	no	no	1	329	m	m	7	67
3	19	female	Mouth\jj_fear_up_no_mouth.jpg	jj	fear	yes	no	1	396	m	m	7	67
3	19	female	Mouth\jj_happy_jumbled_no_mouth.jpg	jj	happy	no	no	1	349	m	m	7	67
3	19	female	Mouth\sw_happy_jumbled_no_mouth.jpg	sw	happy	no	no	1	800	m	m	7	67
3	19	female	Mouth\cc_fear_up_mouth.jpg	cc	fear	yes	yes	1	298	z	z	7	67
3	19	female	Mouth\em_happy_up_no_mouth.jpg	em	happy	yes	no	1	464	m	m	7	67
3	19	female	Mouth\sw_happy_jumbled_mouth.jpg	sw	happy	no	yes	1	304	z	z	7	67
3	19	female	Mouth\cc_happy_up_mouth.jpg	cc	happy	yes	yes	0	358	z	m	7	67
3	19	female	Mouth\pf_happy_up_mouth.jpg	pf	happy	yes	yes	1	265	z	z	7	67
3	19	female	Mouth\jj_fear_jumbled_no_mouth.jpg	jj	fear	no	no	0	289	m	z	6	66
3	19	female	Mouth\mo_fear_jumbled_mouth.jpg	mo	fear	no	yes	1	400	z	z	7	67
3	19	female	Mouth\wf_happy_up_no_mouth.jpg	wf	happy	yes	no	1	426	m	m	7	67
3	19	female	Mouth\pe_happy_jumbled_mouth.jpg	pe	happy	no	yes	1	291	z	z	7	67
3	19	female	Mouth\mf_fear_up_no_mouth.jpg	mf	fear	yes	no	1	577	m	m	7	67
3	19	female	Mouth\pf_happy_up_no_mouth.jpg	pf	happy	yes	no	0	429	m	z	7	67
3	19	female	Mouth\r_happy_jumbled_no_mouth.jpg	r_	happy	no	no	0	349	m	z	6	66
3	19	female	Mouth\jj_fear_jumbled_mouth.jpg	jj	fear	no	yes	1	304	z	z	7	67
3	19	female	Mouth\mo_happy_up_mouth.jpg	mo	happy	yes	yes	1	287	z	z	6	66
3	19	female	Mouth\sw_happy_up_mouth.jpg	sw	happy	yes	yes	1	341	z	z	7	67
3	19	female	Mouth\mo_fear_up_no_mouth.jpg	mo	fear	yes	no	1	402	m	m	6	66
3	19	female	Mouth\pe_happy_up_mouth.jpg	pe	happy	yes	yes	1	380	z	z	7	67
3	19	female	Mouth\pe_fear_up_mouth.jpg	pe	fear	yes	yes	1	366	z	z	6	66
3	19	female	Mouth\mf_happy_jumbled_mouth.jpg	mf	happy	no	yes	1	281	z	z	7	67
3	19	female	Mouth\r_fear_jumbled_no_mouth.jpg	r_	fear	no	no	0	312	m	z	7	67
3	19	female	Mouth\mf_happy_up_no_mouth.jpg	mf	happy	yes	no	1	469	m	m	6	66
3	19	female	Mouth\pf_fear_jumbled_no_mouth.jpg	pf	fear	no	no	1	348	m	m	6	66
3	19	female	Mouth\mo_happy_jumbled_no_mouth.jpg	mo	happy	no	no	1	353	m	m	7	67
3	19	female	Mouth\r_happy_up_no_mouth.jpg	r_	happy	yes	no	1	332	m	m	6	66
3	19	female	Mouth\em_fear_jumbled_no_mouth.jpg	em	fear	no	no	0	392	m	z	7	67
3	19	female	Mouth\pf_happy_jumbled_mouth.jpg	pf	happy	no	yes	0	330	z	m	7	67
3	19	female	Mouth\pe_fear_up_no_mouth.jpg	pe	fear	yes	no	0	390	m	z	7	67
3	19	female	Mouth\em_fear_up_no_mouth.jpg	em	fear	yes	no	1	345	m	m	7	67
3	19	female	Mouth\em_fear_jumbled_mouth.jpg	em	fear	no	yes	1	405	z	z	7	67
3	19	female	Mouth\r_fear_up_mouth.jpg	r_	fear	yes	yes	0	415	z	m	7	67
3	19	female	Mouth\sw_fear_jumbled_mouth.jpg	sw	fear	no	yes	1	263	z	z	6	66
3	19	female	Mouth\mf_happy_jumbled_no_mouth.jpg	mf	happy	no	no	1	262	m	m	7	67
3	19	female	Mouth\r_happy_up_mouth.jpg	r_	happy	yes	yes	1	302	z	z	6	66
3	19	female	Mouth\jj_happy_up_no_mouth.jpg	jj	happy	yes	no	1	284	m	m	6	66
3	19	female	Mouth\cc_fear_jumbled_mouth.jpg	cc	fear	no	yes	1	562	z	z	7	67
3	19	female	Mouth\em_happy_jumbled_no_mouth.jpg	em	happy	no	no	0	396	m	z	7	67
3	19	female	Mouth\r_fear_jumbled_mouth.jpg	r_	fear	no	yes	1	413	z	z	7	67
3	19	female	Mouth\cc_fear_jumbled_no_mouth.jpg	cc	fear	no	no	1	374	m	m	6	66
3	19	female	Mouth\jj_fear_up_mouth.jpg	jj	fear	yes	yes	1	361	z	z	6	66
3	19	female	Mouth\sw_happy_up_no_mouth.jpg	sw	happy	yes	no	1	356	m	m	7	67
3	19	female	Mouth\mf_fear_up_mouth.jpg	mf	fear	yes	yes	0	440	z	m	7	67
3	19	female	Mouth\cc_happy_jumbled_mouth.jpg	cc	happy	no	yes	1	721	z	z	7	67
3	19	female	Mouth\r_fear_up_no_mouth.jpg	r_	fear	yes	no	1	415	m	m	7	67
3	19	female	Mouth\wf_fear_up_mouth.jpg	wf	fear	yes	yes	1	617	z	z	7	67
3	19	female	Mouth\pe_happy_up_no_mouth.jpg	pe	happy	yes	no	1	363	m	m	7	67
3	19	female	Mouth\cc_happy_up_no_mouth.jpg	cc	happy	yes	no	0	286	m	z	6	66
3	19	female	Mouth\mo_fear_up_mouth.jpg	mo	fear	yes	yes	0	348	z	m	7	67
3	19	female	Mouth\mf_fear_jumbled_no_mouth.jpg	mf	fear	no	no	1	504	m	m	7	67
3	19	female	Mouth\pe_fear_jumbled_no_mouth.jpg	pe	fear	no	no	1	430	m	m	6	66
3	19	female	Mouth\wf_fear_jumbled_no_mouth.jpg	wf	fear	no	no	1	446	m	m	6	66
3	19	female	Mouth\mo_happy_jumbled_mouth.jpg	mo	happy	no	yes	1	367	z	z	7	67
3	19	female	Mouth\em_happy_up_mouth.jpg	em	happy	yes	yes	1	330	z	z	6	66
3	19	female	Mouth\wf_fear_up_no_mouth.jpg	wf	fear	yes	no	1	478	m	m	7	67
3	19	female	Mouth\pf_happy_jumbled_no_mouth.jpg	pf	happy	no	no	0	595	m	z	7	67
3	19	female	Mouth\r_happy_jumbled_mouth.jpg	r_	happy	no	yes	1	333	z	z	7	67
3	19	female	Mouth\wf_happy_jumbled_no_mouth.jpg	wf	happy	no	no	0	378	m	z	7	67
3	19	female	Mouth\mf_happy_up_mouth.jpg	mf	happy	yes	yes	1	331	z	z	6	66
3	19	female	Mouth\mo_fear_jumbled_no_mouth.jpg	mo	fear	no	no	0	344	m	z	7	67
3	19	female	Mouth\cc_fear_up_no_mouth.jpg	cc	fear	yes	no	0	364	m	z	6	66
3	19	female	Mouth\jj_happy_up_mouth.jpg	jj	happy	yes	yes	1	295	z	z	7	67
3	19	female	Mouth\pe_happy_jumbled_no_mouth.jpg	pe	happy	no	no	0	293	m	z	6	66
5	18	female	Mouth\em_happy_jumbled_mouth.jpg	em	happy	no	yes	1	312	z	z	23	83
5	18	female	Mouth\mo_happy_up_no_mouth.jpg	mo	happy	yes	no	1	269	m	m	23	83
5	18	female	Mouth\wf_happy_up_no_mouth.jpg	wf	happy	yes	no	1	404	m	m	6	66
5	18	female	Mouth\em_fear_up_no_mouth.jpg	em	fear	yes	no	1	479	m	m	7	67
5	18	female	Mouth\mo_happy_jumbled_mouth.jpg	mo	happy	no	yes	1	231	z	z	7	67
5	18	female	Mouth\wf_happy_jumbled_mouth.jpg	wf	happy	no	yes	1	279	z	z	7	67
5	18	female	Mouth\mo_fear_jumbled_no_mouth.jpg	mo	fear	no	no	1	253	m	m	6	66
5	18	female	Mouth\pe_happy_up_no_mouth.jpg	pe	happy	yes	no	0	253	m	z	6	66
5	18	female	Mouth\sw_fear_up_mouth.jpg	sw	fear	yes	yes	0	221	z	m	7	67
5	18	female	Mouth\pe_fear_up_mouth.jpg	pe	fear	yes	yes	1	214	z	z	7	67
5	18	female	Mouth\mf_happy_jumbled_no_mouth.jpg	mf	happy	no	no	1	295	m	m	6	66
5	18	female	Mouth\pe_happy_jumbled_mouth.jpg	pe	happy	no	yes	1	362	z	z	6	66
5	18	female	Mouth\r_happy_up_no_mouth.jpg	r_	happy	yes	no	1	348	m	m	7	67
5	18	female	Mouth\wf_fear_up_mouth.jpg	wf	fear	yes	yes	0	392	z	m	6	66
5	18	female	Mouth\mo_happy_up_mouth.jpg	mo	happy	yes	yes	0	523	z	m	7	67
5	18	female	Mouth\jj_happy_jumbled_no_mouth.jpg	jj	happy	no	no	1	751	m	m	6	66
5	18	female	Mouth\r_happy_jumbled_no_mouth.jpg	r_	happy	no	no	1	395	m	m	6	66
5	18	female	Mouth\jj_fear_jumbled_no_mouth.jpg	jj	fear	no	no	1	558	m	m	7	67
5	18	female	Mouth\pf_fear_up_mouth.jpg	pf	fear	yes	yes	1	673	z	z	6	66
5	18	female	Mouth\cc_fear_jumbled_no_mouth.jpg	cc	fear	no	no	1	536	m	m	7	67
5	18	female	Mouth\mf_fear_jumbled_mouth.jpg	mf	fear	no	yes	0	804	z	m	7	67
5	18	female	Mouth\jj_fear_jumbled_mouth.jpg	jj	fear	no	yes	1	501	z	z	6	66
5	18	female	Mouth\pf_happy_up_mouth.jpg	pf	happy	yes	yes	0	947	z	m	6	66
5	18	female	Mouth\pe_fear_up_no_mouth.jpg	pe	fear	yes	no	1	391	m	m	6	66
5	18	female	Mouth\pe_happy_up_mouth.jpg	pe	happy	yes	yes	0	338	z	m	7	67
5	18	female	Mouth\mo_fear_jumbled_mouth.jpg	mo	fear	no	yes	0	424	z	m	7	67
5	18	female	Mouth\wf_fear_jumbled_no_mouth.jpg	wf	fear	no	no	0	296	m	z	6	66
5	18	female	Mouth\wf_happy_up_mouth.jpg	wf	happy	yes	yes	1	502	z	z	6	66
5	18	female	Mouth\r_happy_up_mouth.jpg	r_	happy	yes	yes	0	397	z	m	7	67
5	18	female	Mouth\r_happy_jumbled_mouth.jpg	r_	happy	no	yes	1	182	z	z	7	67
5	18	female	Mouth\mo_fear_up_mouth.jpg	mo	fear	yes	yes	0	369	z	m	6	66
5	18	female	Mouth\mf_happy_jumbled_mouth.jpg	mf	happy	no	yes	1	403	z	z	6	66
5	18	female	Mouth\pf_fear_jumbled_no_mouth.jpg	pf	fear	no	no	1	493	m	m	6	66
5	18	female	Mouth\r_fear_jumbled_no_mouth.jpg	r_	fear	no	no	1	403	m	m	6	66
5	18	female	Mouth\mo_happy_jumbled_no_mouth.jpg	mo	happy	no	no	1	342	m	m	7	67
5	18	female	Mouth\pe_fear_jumbled_mouth.jpg	pe	fear	no	yes	1	442	z	z	6	66
5	18	female	Mouth\cc_happy_up_mouth.jpg	cc	happy	yes	yes	1	331	z	z	7	67
5	18	female	Mouth\cc_happy_jumbled_no_mouth.jpg	cc	happy	no	no	1	495	m	m	6	66
5	18	female	Mouth\r_fear_up_mouth.jpg	r_	fear	yes	yes	1	741	z	z	6	66
5	18	female	Mouth\sw_happy_up_mouth.jpg	sw	happy	yes	yes	0	465	z	m	6	66
5	18	female	Mouth\mf_happy_up_no_mouth.jpg	mf	happy	yes	no	1	576	m	m	7	67
5	18	female	Mouth\mf_fear_jumbled_no_mouth.jpg	mf	fear	no	no	0	315	m	z	6	66
5	18	female	Mouth\mo_fear_up_no_mouth.jpg	mo	fear	yes	no	0	529	m	z	6	66
5	18	female	Mouth\pf_fear_jumbled_mouth.jpg	pf	fear	no	yes	1	814	z	z	6	66
5	18	female	Mouth\r_fear_up_no_mouth.jpg	r_	fear	yes	no	1	328	m	m	6	66
5	18	female	Mouth\jj_fear_up_mouth.jpg	jj	fear	yes	yes	1	365	z	z	7	67
5	18	female	Mouth\mf_fear_up_no_mouth.jpg	mf	fear	yes	no	1	256	m	m	6	66
5	18	female	Mouth\wf_fear_jumbled_mouth.jpg	wf	fear	no	yes	1	528	z	z	7	67
5	18	female	Mouth\cc_fear_jumbled_mouth.jpg	cc	fear	no	yes	1	396	z	z	7	67
5	18	female	Mouth\wf_fear_up_no_mouth.jpg	wf	fear	yes	no	1	380	m	m	6	66
5	18	female	Mouth\em_happy_jumbled_no_mouth.jpg	em	happy	no	no	1	527	m	m	6	66
5	18	female	Mouth\em_happy_up_mouth.jpg	em	happy	yes	yes	0	436	z	m	7	67
5	18	female	Mouth\cc_happy_up_no_mouth.jpg	cc	happy	yes	no	1	356	m	m	7	67
5	18	female	Mouth\jj_fear_up_no_mouth.jpg	jj	fear	yes	no	1	304	m	m	7	67
5	18	female	Mouth\sw_fear_jumbled_no_mouth.jpg	sw	fear	no	no	1	317	m	m	7	67
5	18	female	Mouth\jj_happy_jumbled_mouth.jpg	jj	happy	no	yes	1	283	z	z	7	67
5	18	female	Mouth\mf_fear_up_mouth.jpg	mf	fear	yes	yes	0	289	z	m	6	66
5	18	female	Mouth\wf_happy_jumbled_no_mouth.jpg	wf	happy	no	no	1	376	m	m	7	67
5	18	female	Mouth\em_fear_jumbled_no_mouth.jpg	em	fear	no	no	1	306	m	m	6	66
5	18	female	Mouth\jj_happy_up_mouth.jpg	jj	happy	yes	yes	1	336	z	z	6	66
5	18	female	Mouth\em_fear_up_mouth.jpg	em	fear	yes	yes	0	357	z	m	6	66
5	18	female	Mouth\mf_happy_up_mouth.jpg	mf	happy	yes	yes	0	256	z	m	7	67
5	18	female	Mouth\cc_happy_jumbled_mouth.jpg	cc	happy	no	yes	1	288	z	z	7	67
5	18	female	Mouth\pf_fear_up_no_mouth.jpg	pf	fear	yes	no	0	319	m	z	7	67
5	18	female	Mouth\pe_happy_jumbled_no_mouth.jpg	pe	happy	no	no	1	348	m	m	6	66
5	18	female	Mouth\cc_fear_up_no_mouth.jpg	cc	fear	yes	no	1	569	m	m	7	67
5	18	female	Mouth\em_fear_jumbled_mouth.jpg	em	fear	no	yes	1	412	z	z	7	67
5	18	female	Mouth\sw_happy_jumbled_mouth.jpg	sw	happy	no	yes	1	549	z	z	7	67
5	18	female	Mouth\sw_fear_up_no_mouth.jpg	sw	fear	yes	no	1	465	m	m	7	67
5	18	female	Mouth\pf_happy_jumbled_no_mouth.jpg	pf	happy	no	no	1	424	m	m	6	66
5	18	female	Mouth\jj_happy_up_no_mouth.jpg	jj	happy	yes	no	1	217	m	m	6	66
5	18	female	Mouth\sw_happy_jumbled_no_mouth.jpg	sw	happy	no	no	1	434	m	m	7	67
5	18	female	Mouth\sw_happy_up_no_mouth.jpg	sw	happy	yes	no	1	467	m	m	7	67
5	18	female	Mouth\pf_happy_jumbled_mouth.jpg	pf	happy	no	yes	0	386	z	m	6	66
5	18	female	Mouth\sw_fear_jumbled_mouth.jpg	sw	fear	no	yes	1	308	z	z	6	66
5	18	female	Mouth\cc_fear_up_mouth.jpg	cc	fear	yes	yes	0	312	z	m	7	67
5	18	female	Mouth\r_fear_jumbled_mouth.jpg	r_	fear	no	yes	1	389	z	z	6	66
5	18	female	Mouth\em_happy_up_no_mouth.jpg	em	happy	yes	no	1	464	m	m	7	67
5	18	female	Mouth\pe_fear_jumbled_no_mouth.jpg	pe	fear	no	no	1	616	m	m	7	67
5	18	female	Mouth\pf_happy_up_no_mouth.jpg	pf	happy	yes	no	1	609	m	m	7	67
5	18	female	Mouth\sw_happy_up_mouth.jpg	sw	happy	yes	yes	0	802	z	m	7	67
5	18	female	Mouth\sw_fear_jumbled_mouth.jpg	sw	fear	no	yes	1	292	z	z	7	67
5	18	female	Mouth\jj_happy_jumbled_no_mouth.jpg	jj	happy	no	no	1	233	m	m	6	66
5	18	female	Mouth\cc_fear_up_no_mouth.jpg	cc	fear	yes	no	1	266	m	m	6	66
5	18	female	Mouth\sw_fear_up_no_mouth.jpg	sw	fear	yes	no	1	306	m	m	6	66
5	18	female	Mouth\mf_fear_up_mouth.jpg	mf	fear	yes	yes	0	216	z	m	7	67
5	18	female	Mouth\jj_fear_up_mouth.jpg	jj	fear	yes	yes	1	665	z	z	6	66
5	18	female	Mouth\pe_fear_up_mouth.jpg	pe	fear	yes	yes	1	408	z	z	7	67
5	18	female	Mouth\r_fear_jumbled_no_mouth.jpg	r_	fear	no	no	1	490	m	m	7	67
5	18	female	Mouth\mo_fear_up_mouth.jpg	mo	fear	yes	yes	0	424	z	m	6	66
5	18	female	Mouth\em_fear_jumbled_mouth.jpg	em	fear	no	yes	1	409	z	z	7	67
5	18	female	Mouth\pe_happy_up_mouth.jpg	pe	happy	yes	yes	0	555	z	m	7	67
5	18	female	Mouth\cc_happy_jumbled_no_mouth.jpg	cc	happy	no	no	1	255	m	m	7	67
5	18	female	Mouth\r_happy_jumbled_no_mouth.jpg	r_	happy	no	no	1	695	m	m	6	66
5	18	female	Mouth\jj_fear_up_no_mouth.jpg	jj	fear	yes	no	1	396	m	m	7	67
5	18	female	Mouth\pf_fear_up_mouth.jpg	pf	fear	yes	yes	1	702	z	z	7	67
5	18	female	Mouth\mf_happy_up_mouth.jpg	mf	happy	yes	yes	0	386	z	m	7	67
5	18	female	Mouth\cc_fear_up_mouth.jpg	cc	fear	yes	yes	0	611	z	m	7	67
5	18	female	Mouth\jj_happy_jumbled_mouth.jpg	jj	happy	no	yes	1	557	z	z	7	67
5	18	female	Mouth\jj_happy_up_no_mouth.jpg	jj	happy	yes	no	1	769	m	m	7	67
5	18	female	Mouth\pf_happy_up_mouth.jpg	pf	happy	yes	yes	0	564	z	m	6	66
5	18	female	Mouth\sw_fear_jumbled_no_mouth.jpg	sw	fear	no	no	1	639	m	m	6	66
5	18	female	Mouth\mo_fear_jumbled_mouth.jpg	mo	fear	no	yes	1	320	z	z	7	67
5	18	female	Mouth\pf_happy_jumbled_no_mouth.jpg	pf	happy	no	no	1	237	m	m	6	66
5	18	female	Mouth\wf_happy_jumbled_no_mouth.jpg	wf	happy	no	no	1	254	m	m	6	66
5	18	female	Mouth\mo_fear_jumbled_no_mouth.jpg	mo	fear	no	no	1	238	m	m	6	66
5	18	female	Mouth\em_fear_up_mouth.jpg	em	fear	yes	yes	0	255	z	m	6	66
5	18	female	Mouth\pe_fear_jumbled_mouth.jpg	pe	fear	no	yes	1	304	z	z	7	67
5	18	female	Mouth\em_happy_up_no_mouth.jpg	em	happy	yes	no	1	318	m	m	6	66
5	18	female	Mouth\pe_fear_up_no_mouth.jpg	pe	fear	yes	no	1	499	m	m	7	67
5	18	female	Mouth\mo_happy_jumbled_no_mouth.jpg	mo	happy	no	no	0	354	m	z	6	66
5	18	female	Mouth\cc_happy_up_no_mouth.jpg	cc	happy	yes	no	1	310	m	m	7	67
5	18	female	Mouth\pf_fear_jumbled_no_mouth.jpg	pf	fear	no	no	1	291	m	m	6	66
5	18	female	Mouth\em_fear_up_no_mouth.jpg	em	fear	yes	no	1	218	m	m	7	67
5	18	female	Mouth\r_happy_up_mouth.jpg	r_	happy	yes	yes	0	163	z	m	7	67
5	18	female	Mouth\mf_happy_up_no_mouth.jpg	mf	happy	yes	no	0	579	m	z	7	67
5	18	female	Mouth\em_happy_jumbled_mouth.jpg	em	happy	no	yes	1	398	z	z	6	66
5	18	female	Mouth\pe_happy_up_no_mouth.jpg	pe	happy	yes	no	1	216	m	m	6	66
5	18	female	Mouth\cc_fear_jumbled_no_mouth.jpg	cc	fear	no	no	1	336	m	m	7	67
5	18	female	Mouth\r_fear_jumbled_mouth.jpg	r_	fear	no	yes	1	309	z	z	6	66
5	18	female	Mouth\mf_happy_jumbled_no_mouth.jpg	mf	happy	no	no	1	322	m	m	6	66
5	18	female	Mouth\sw_happy_jumbled_no_mouth.jpg	sw	happy	no	no	1	335	m	m	7	67
5	18	female	Mouth\jj_happy_up_mouth.jpg	jj	happy	yes	yes	0	860	z	m	7	67
5	18	female	Mouth\mo_happy_jumbled_mouth.jpg	mo	happy	no	yes	1	324	z	z	6	66
5	18	female	Mouth\pf_fear_up_no_mouth.jpg	pf	fear	yes	no	1	353	m	m	6	66
5	18	female	Mouth\mf_fear_jumbled_no_mouth.jpg	mf	fear	no	no	1	253	m	m	6	66
5	18	female	Mouth\cc_happy_jumbled_mouth.jpg	cc	happy	no	yes	0	173	z	m	7	67
5	18	female	Mouth\pe_happy_jumbled_no_mouth.jpg	pe	happy	no	no	1	257	m	m	7	67
5	18	female	Mouth\jj_fear_jumbled_no_mouth.jpg	jj	fear	no	no	1	249	m	m	6	66
5	18	female	Mouth\wf_fear_up_no_mouth.jpg	wf	fear	yes	no	1	336	m	m	7	67
5	18	female	Mouth\sw_happy_up_no_mouth.jpg	sw	happy	yes	no	1	309	m	m	7	67
5	18	female	Mouth\pf_happy_jumbled_mouth.jpg	pf	happy	no	yes	0	314	z	m	6	66
5	18	female	Mouth\wf_happy_up_mouth.jpg	wf	happy	yes	yes	0	415	z	m	6	66
5	18	female	Mouth\cc_fear_jumbled_mouth.jpg	cc	fear	no	yes	1	296	z	z	7	67
5	18	female	Mouth\r_fear_up_mouth.jpg	r_	fear	yes	yes	0	373	z	m	7	67
5	18	female	Mouth\wf_happy_up_no_mouth.jpg	wf	happy	yes	no	1	536	m	m	7	67
5	18	female	Mouth\em_happy_up_mouth.jpg	em	happy	yes	yes	0	451	z	m	7	67
5	18	female	Mouth\mf_fear_jumbled_mouth.jpg	mf	fear	no	yes	1	371	z	z	6	66
5	18	female	Mouth\r_happy_jumbled_mouth.jpg	r_	happy	no	yes	0	654	z	m	7	67
5	18	female	Mouth\mo_fear_up_no_mouth.jpg	mo	fear	yes	no	1	343	m	m	6	66
5	18	female	Mouth\wf_fear_jumbled_no_mouth.jpg	wf	fear	no	no	1	338	m	m	6	66
5	18	female	Mouth\cc_happy_up_mouth.jpg	cc	happy	yes	yes	0	207	z	m	7	67
5	18	female	Mouth\mf_happy_jumbled_mouth.jpg	mf	happy	no	yes	1	441	z	z	7	67
5	18	female	Mouth\sw_happy_jumbled_mouth.jpg	sw	happy	no	yes	1	442	z	z	7	67
5	18	female	Mouth\em_happy_jumbled_no_mouth.jpg	em	happy	no	no	1	514	m	m	7	67
5	18	female	Mouth\em_fear_jumbled_no_mouth.jpg	em	fear	no	no	1	351	m	m	6	66
5	18	female	Mouth\pe_fear_jumbled_no_mouth.jpg	pe	fear	no	no	1	243	m	m	7	67
5	18	female	Mouth\mo_happy_up_no_mouth.jpg	mo	happy	yes	no	1	227	m	m	7	67
5	18	female	Mouth\pf_fear_jumbled_mouth.jpg	pf	fear	no	yes	1	301	z	z	7	67
5	18	female	Mouth\wf_happy_jumbled_mouth.jpg	wf	happy	no	yes	1	234	z	z	7	67
5	18	female	Mouth\mf_fear_up_no_mouth.jpg	mf	fear	yes	no	1	306	m	m	6	66
5	18	female	Mouth\mo_happy_up_mouth.jpg	mo	happy	yes	yes	0	345	z	m	7	67
5	18	female	Mouth\jj_fear_jumbled_mouth.jpg	jj	fear	no	yes	0	364	z	m	6	66
5	18	female	Mouth\r_happy_up_no_mouth.jpg	r_	happy	yes	no	1	397	m	m	7	67
5	18	female	Mouth\wf_fear_jumbled_mouth.jpg	wf	fear	no	yes	0	351	z	m	7	67
5	18	female	Mouth\r_fear_up_no_mouth.jpg	r_	fear	yes	no	1	732	m	m	6	66
5	18	female	Mouth\pf_happy_up_no_mouth.jpg	pf	happy	yes	no	1	305	m	m	6	66
5	18	female	Mouth\wf_fear_up_mouth.jpg	wf	fear	yes	yes	0	456	z	m	7	67
5	18	female	Mouth\pe_happy_jumbled_mouth.jpg	pe	happy	no	yes	1	392	z	z	7	67
5	18	female	Mouth\sw_fear_up_mouth.jpg	sw	fear	yes	yes	0	314	z	m	6	66
5	18	female	Mouth\jj_happy_jumbled_mouth.jpg	jj	happy	no	yes	1	540	z	z	7	67
5	18	female	Mouth\cc_happy_up_no_mouth.jpg	cc	happy	yes	no	1	232	m	m	6	66
5	18	female	Mouth\pf_fear_jumbled_no_mouth.jpg	pf	fear	no	no	1	241	m	m	7	67
5	18	female	Mouth\em_happy_up_mouth.jpg	em	happy	yes	yes	0	185	z	m	6	66
5	18	female	Mouth\cc_happy_up_mouth.jpg	cc	happy	yes	yes	0	372	z	m	6	66
5	18	female	Mouth\pf_fear_up_no_mouth.jpg	pf	fear	yes	no	1	222	m	m	7	67
5	18	female	Mouth\r_happy_up_mouth.jpg	r_	happy	yes	yes	0	240	z	m	6	66
5	18	female	Mouth\sw_happy_jumbled_mouth.jpg	sw	happy	no	yes	1	289	z	z	7	67
5	18	female	Mouth\jj_fear_jumbled_mouth.jpg	jj	fear	no	yes	1	311	z	z	6	66
5	18	female	Mouth\mo_fear_up_no_mouth.jpg	mo	fear	yes	no	1	245	m	m	6	66
5	18	female	Mouth\jj_fear_up_no_mouth.jpg	jj	fear	yes	no	1	212	m	m	7	67
5	18	female	Mouth\mf_happy_jumbled_mouth.jpg	mf	happy	no	yes	1	269	z	z	7	67
5	18	female	Mouth\sw_fear_up_no_mouth.jpg	sw	fear	yes	no	1	205	m	m	7	67
5	18	female	Mouth\pe_happy_up_mouth.jpg	pe	happy	yes	yes	0	304	z	m	7	67
5	18	female	Mouth\mf_fear_jumbled_no_mouth.jpg	mf	fear	no	no	1	374	m	m	7	67
5	18	female	Mouth\em_happy_jumbled_mouth.jpg	em	happy	no	yes	1	329	z	z	7	67
5	18	female	Mouth\r_fear_jumbled_mouth.jpg	r_	fear	no	yes	1	357	z	z	7	67
5	18	female	Mouth\pe_happy_jumbled_no_mouth.jpg	pe	happy	no	no	1	241	m	m	6	66
5	18	female	Mouth\r_happy_jumbled_mouth.jpg	r_	happy	no	yes	1	338	z	z	7	67
5	18	female	Mouth\pf_happy_up_no_mouth.jpg	pf	happy	yes	no	1	231	m	m	7	67
5	18	female	Mouth\em_happy_up_no_mouth.jpg	em	happy	yes	no	1	200	m	m	6	66
5	18	female	Mouth\wf_happy_jumbled_mouth.jpg	wf	happy	no	yes	1	185	z	z	6	66
5	18	female	Mouth\r_fear_up_no_mouth.jpg	r_	fear	yes	no	1	244	m	m	7	67
5	18	female	Mouth\r_fear_jumbled_no_mouth.jpg	r_	fear	no	no	1	284	m	m	6	66
5	18	female	Mouth\wf_fear_jumbled_mouth.jpg	wf	fear	no	yes	1	243	z	z	7	67
5	18	female	Mouth\mo_happy_up_no_mouth.jpg	mo	happy	yes	no	1	322	m	m	6	66
5	18	female	Mouth\r_fear_up_mouth.jpg	r_	fear	yes	yes	1	375	z	z	7	67
5	18	female	Mouth\sw_happy_up_no_mouth.jpg	sw	happy	yes	no	1	370	m	m	7	67
5	18	female	Mouth\cc_happy_jumbled_no_mouth.jpg	cc	happy	no	no	1	213	m	m	6	66
5	18	female	Mouth\em_fear_jumbled_mouth.jpg	em	fear	no	yes	1	254	z	z	6	66
5	18	female	Mouth\mo_happy_jumbled_mouth.jpg	mo	happy	no	yes	1	399	z	z	7	67
5	18	female	Mouth\pe_fear_jumbled_no_mouth.jpg	pe	fear	no	no	1	217	m	m	7	67
5	18	female	Mouth\pf_happy_jumbled_no_mouth.jpg	pf	happy	no	no	1	377	m	m	6	66
5	18	female	Mouth\pf_fear_up_mouth.jpg	pf	fear	yes	yes	0	387	z	m	6	66
5	18	female	Mouth\jj_happy_up_mouth.jpg	jj	happy	yes	yes	0	350	z	m	7	67
5	18	female	Mouth\pe_happy_up_no_mouth.jpg	pe	happy	yes	no	1	313	m	m	7	67
5	18	female	Mouth\cc_fear_up_no_mouth.jpg	cc	fear	yes	no	1	239	m	m	6	66
5	18	female	Mouth\sw_happy_jumbled_no_mouth.jpg	sw	happy	no	no	1	344	m	m	7	67
5	18	female	Mouth\pf_happy_jumbled_mouth.jpg	pf	happy	no	yes	0	276	z	m	7	67
5	18	female	Mouth\pe_fear_jumbled_mouth.jpg	pe	fear	no	yes	1	307	z	z	7	67
5	18	female	Mouth\jj_happy_jumbled_no_mouth.jpg	jj	happy	no	no	1	560	m	m	6	66
5	18	female	Mouth\pe_happy_jumbled_mouth.jpg	pe	happy	no	yes	1	356	z	z	6	66
5	18	female	Mouth\cc_fear_jumbled_mouth.jpg	cc	fear	no	yes	1	399	z	z	6	66
5	18	female	Mouth\cc_happy_jumbled_mouth.jpg	cc	happy	no	yes	1	466	z	z	7	67
5	18	female	Mouth\em_fear_up_no_mouth.jpg	em	fear	yes	no	1	408	m	m	6	66
5	18	female	Mouth\mf_happy_up_mouth.jpg	mf	happy	yes	yes	0	272	z	m	7	67
5	18	female	Mouth\wf_happy_jumbled_no_mouth.jpg	wf	happy	no	no	1	480	m	m	7	67
5	18	female	Mouth\pe_fear_up_no_mouth.jpg	pe	fear	yes	no	1	246	m	m	7	67
5	18	female	Mouth\mo_happy_jumbled_no_mouth.jpg	mo	happy	no	no	0	311	m	z	7	67
5	18	female	Mouth\cc_fear_up_mouth.jpg	cc	fear	yes	yes	0	267	z	m	7	67
5	18	female	Mouth\mo_fear_jumbled_mouth.jpg	mo	fear	no	yes	0	139	z	m	6	66
5	18	female	Mouth\wf_fear_up_mouth.jpg	wf	fear	yes	yes	0	504	z	m	6	66
5	18	female	Mouth\em_fear_up_mouth.jpg	em	fear	yes	yes	0	375	z	m	7	67
5	18	female	Mouth\jj_fear_jumbled_no_mouth.jpg	jj	fear	no	no	1	562	m	m	6	66
5	18	female	Mouth\wf_happy_up_no_mouth.jpg	wf	happy	yes	no	1	541	m	m	7	67
5	18	female	Mouth\jj_fear_up_mouth.jpg	jj	fear	yes	yes	1	249	z	z	7	67
5	18	female	Mouth\mo_fear_up_mouth.jpg	mo	fear	yes	yes	0	369	z	m	6	66
5	18	female	Mouth\pf_happy_up_mouth.jpg	pf	happy	yes	yes	0	364	z	m	7	67
5	18	female	Mouth\wf_fear_jumbled_no_mouth.jpg	wf	fear	no	no	0	519	m	z	7	67
5	18	female	Mouth\r_happy_jumbled_no_mouth.jpg	r_	happy	no	no	1	276	m	m	6	66
5	18	female	Mouth\sw_fear_jumbled_mouth.jpg	sw	fear	no	yes	1	250	z	z	6	66
5	18	female	Mouth\mo_fear_jumbled_no_mouth.jpg	mo	fear	no	no	1	370	m	m	7	67
5	18	female	Mouth\sw_fear_jumbled_no_mouth.jpg	sw	fear	no	no	0	373	m	z	6	66
5	18	female	Mouth\mf_fear_up_mouth.jpg	mf	fear	yes	yes	0	399	z	m	6	66
5	18	female	Mouth\sw_fear_up_mouth.jpg	sw	fear	yes	yes	0	225	z	m	6	66
5	18	female	Mouth\mo_happy_up_mouth.jpg	mo	happy	yes	yes	0	290	z	m	7	67
5	18	female	Mouth\cc_fear_jumbled_no_mouth.jpg	cc	fear	no	no	0	433	m	z	7	67
5	18	female	Mouth\pf_fear_jumbled_mouth.jpg	pf	fear	no	yes	1	370	z	z	7	67
5	18	female	Mouth\pe_fear_up_mouth.jpg	pe	fear	yes	yes	1	341	z	z	6	66
5	18	female	Mouth\wf_fear_up_no_mouth.jpg	wf	fear	yes	no	1	353	m	m	7	67
5	18	female	Mouth\mf_fear_jumbled_mouth.jpg	mf	fear	no	yes	0	445	z	m	7	67
5	18	female	Mouth\wf_happy_up_mouth.jpg	wf	happy	yes	yes	0	501	z	m	7	67
5	18	female	Mouth\r_happy_up_no_mouth.jpg	r_	happy	yes	no	1	434	m	m	6	66
5	18	female	Mouth\mf_happy_up_no_mouth.jpg	mf	happy	yes	no	1	594	m	m	7	67
5	18	female	Mouth\mf_fear_up_no_mouth.jpg	mf	fear	yes	no	1	308	m	m	7	67
5	18	female	Mouth\em_happy_jumbled_no_mouth.jpg	em	happy	no	no	1	370	m	m	7	67
5	18	female	Mouth\sw_happy_up_mouth.jpg	sw	happy	yes	yes	0	333	z	m	7	67
5	18	female	Mouth\mf_happy_jumbled_no_mouth.jpg	mf	happy	no	no	1	369	m	m	7	67
5	18	female	Mouth\jj_happy_up_no_mouth.jpg	jj	happy	yes	no	1	365	m	m	7	67
5	18	female	Mouth\em_fear_jumbled_no_mouth.jpg	em	fear	no	no	1	391	m	m	6	66
5	18	female	Mouth\pe_fear_jumbled_no_mouth.jpg	pe	fear	no	no	1	480	m	m	7	67
5	18	female	Mouth\mf_fear_up_no_mouth.jpg	mf	fear	yes	no	0	398	m	z	7	67
5	18	female	Mouth\mo_happy_jumbled_no_mouth.jpg	mo	happy	no	no	0	361	m	z	6	66
5	18	female	Mouth\mf_fear_up_mouth.jpg	mf	fear	yes	yes	0	356	z	m	6	66
5	18	female	Mouth\sw_happy_up_no_mouth.jpg	sw	happy	yes	no	1	400	m	m	6	66
5	18	female	Mouth\mo_fear_up_mouth.jpg	mo	fear	yes	yes	0	482	z	m	6	66
5	18	female	Mouth\wf_fear_jumbled_no_mouth.jpg	wf	fear	no	no	1	416	m	m	7	67
5	18	female	Mouth\wf_happy_jumbled_no_mouth.jpg	wf	happy	no	no	1	258	m	m	7	67
5	18	female	Mouth\mf_happy_jumbled_mouth.jpg	mf	happy	no	yes	1	362	z	z	7	67
5	18	female	Mouth\cc_fear_jumbled_mouth.jpg	cc	fear	no	yes	0	244	z	m	7	67
5	18	female	Mouth\pe_happy_up_mouth.jpg	pe	happy	yes	yes	1	588	z	z	6	66
5	18	female	Mouth\cc_fear_up_mouth.jpg	cc	fear	yes	yes	0	358	z	m	6	66
5	18	female	Mouth\wf_happy_up_mouth.jpg	wf	happy	yes	yes	0	330	z	m	7	67
5	18	female	Mouth\r_fear_up_no_mouth.jpg	r_	fear	yes	no	1	215	m	m	6	66
5	18	female	Mouth\wf_happy_up_no_mouth.jpg	wf	happy	yes	no	1	271	m	m	6	66
5	18	female	Mouth\pf_fear_up_no_mouth.jpg	pf	fear	yes	no	1	246	m	m	7	67
5	18	female	Mouth\wf_fear_up_mouth.jpg	wf	fear	yes	yes	0	311	z	m	7	67
5	18	female	Mouth\r_fear_jumbled_mouth.jpg	r_	fear	no	yes	0	372	z	m	6	66
5	18	female	Mouth\r_fear_up_mouth.jpg	r_	fear	yes	yes	0	599	z	m	6	66
5	18	female	Mouth\jj_fear_up_mouth.jpg	jj	fear	yes	yes	0	177	z	m	6	66
5	18	female	Mouth\cc_happy_jumbled_mouth.jpg	cc	happy	no	yes	0	420	z	m	7	67
5	18	female	Mouth\cc_fear_jumbled_no_mouth.jpg	cc	fear	no	no	1	245	m	m	6	66
5	18	female	Mouth\sw_happy_jumbled_no_mouth.jpg	sw	happy	no	no	1	285	m	m	7	67
5	18	female	Mouth\sw_fear_jumbled_no_mouth.jpg	sw	fear	no	no	1	603	m	m	7	67
5	18	female	Mouth\mo_fear_up_no_mouth.jpg	mo	fear	yes	no	1	1326	m	m	6	66
5	18	female	Mouth\wf_fear_up_no_mouth.jpg	wf	fear	yes	no	1	466	m	m	6	66
5	18	female	Mouth\em_happy_up_mouth.jpg	em	happy	yes	yes	0	265	z	m	7	67
5	18	female	Mouth\r_fear_jumbled_no_mouth.jpg	r_	fear	no	no	1	257	m	m	7	67
5	18	female	Mouth\jj_happy_up_no_mouth.jpg	jj	happy	yes	no	1	632	m	m	7	67
5	18	female	Mouth\pe_fear_up_no_mouth.jpg	pe	fear	yes	no	1	225	m	m	6	66
5	18	female	Mouth\pf_fear_jumbled_mouth.jpg	pf	fear	no	yes	0	298	z	m	6	66
5	18	female	Mouth\pe_fear_up_mouth.jpg	pe	fear	yes	yes	1	240	z	z	6	66
5	18	female	Mouth\jj_happy_up_mouth.jpg	jj	happy	yes	yes	0	401	z	m	7	67
5	18	female	Mouth\pe_happy_jumbled_mouth.jpg	pe	happy	no	yes	1	530	z	z	6	66
5	18	female	Mouth\jj_fear_jumbled_mouth.jpg	jj	fear	no	yes	1	550	z	z	6	66
5	18	female	Mouth\pf_happy_up_mouth.jpg	pf	happy	yes	yes	0	378	z	m	6	66
5	18	female	Mouth\em_fear_jumbled_mouth.jpg	em	fear	no	yes	0	341	z	m	7	67
5	18	female	Mouth\jj_fear_jumbled_no_mouth.jpg	jj	fear	no	no	1	1066	m	m	7	67
5	18	female	Mouth\sw_fear_up_mouth.jpg	sw	fear	yes	yes	0	497	z	m	7	67
5	18	female	Mouth\em_fear_up_no_mouth.jpg	em	fear	yes	no	1	623	m	m	6	66
5	18	female	Mouth\pf_fear_up_mouth.jpg	pf	fear	yes	yes	0	608	z	m	7	67
5	18	female	Mouth\pe_fear_jumbled_mouth.jpg	pe	fear	no	yes	1	426	z	z	7	67
5	18	female	Mouth\mo_happy_jumbled_mouth.jpg	mo	happy	no	yes	0	835	z	m	6	66
5	18	female	Mouth\cc_happy_up_no_mouth.jpg	cc	happy	yes	no	1	340	m	m	7	67
5	18	female	Mouth\em_happy_jumbled_no_mouth.jpg	em	happy	no	no	1	369	m	m	6	66
5	18	female	Mouth\jj_fear_up_no_mouth.jpg	jj	fear	yes	no	1	331	m	m	7	67
5	18	female	Mouth\r_happy_up_no_mouth.jpg	r_	happy	yes	no	1	231	m	m	7	67
5	18	female	Mouth\cc_happy_up_mouth.jpg	cc	happy	yes	yes	0	328	z	m	7	67
5	18	female	Mouth\mo_happy_up_no_mouth.jpg	mo	happy	yes	no	1	269	m	m	6	66
5	18	female	Mouth\pe_happy_jumbled_no_mouth.jpg	pe	happy	no	no	1	268	m	m	6	66
5	18	female	Mouth\mf_happy_up_no_mouth.jpg	mf	happy	yes	no	1	418	m	m	7	67
5	18	female	Mouth\mo_happy_up_mouth.jpg	mo	happy	yes	yes	0	188	z	m	7	67
5	18	female	Mouth\r_happy_jumbled_no_mouth.jpg	r_	happy	no	no	1	295	m	m	7	67
5	18	female	Mouth\sw_fear_jumbled_mouth.jpg	sw	fear	no	yes	1	268	z	z	6	66
5	18	female	Mouth\jj_happy_jumbled_mouth.jpg	jj	happy	no	yes	1	219	z	z	6	66
5	18	female	Mouth\mf_fear_jumbled_no_mouth.jpg	mf	fear	no	no	0	260	m	z	7	67
5	18	female	Mouth\r_happy_up_mouth.jpg	r_	happy	yes	yes	0	484	z	m	6	66
5	18	female	Mouth\sw_happy_up_mouth.jpg	sw	happy	yes	yes	1	602	z	z	6	66
5	18	female	Mouth\em_happy_jumbled_mouth.jpg	em	happy	no	yes	1	292	z	z	6	66
5	18	female	Mouth\mo_fear_jumbled_mouth.jpg	mo	fear	no	yes	1	323	z	z	7	67
5	18	female	Mouth\wf_happy_jumbled_mouth.jpg	wf	happy	no	yes	1	679	z	z	6	66
5	18	female	Mouth\pf_happy_jumbled_mouth.jpg	pf	happy	no	yes	1	454	z	z	7	67
5	18	female	Mouth\em_happy_up_no_mouth.jpg	em	happy	yes	no	1	638	m	m	7	67
5	18	female	Mouth\mf_fear_jumbled_mouth.jpg	mf	fear	no	yes	1	399	z	z	6	66
5	18	female	Mouth\em_fear_jumbled_no_mouth.jpg	em	fear	no	no	1	296	m	m	6	66
5	18	female	Mouth\wf_fear_jumbled_mouth.jpg	wf	fear	no	yes	1	470	z	z	6	66
5	18	female	Mouth\em_fear_up_mouth.jpg	em	fear	yes	yes	0	342	z	m	6	66
5	18	female	Mouth\sw_happy_jumbled_mouth.jpg	sw	happy	no	yes	1	258	z	z	7	67
5	18	female	Mouth\pf_fear_jumbled_no_mouth.jpg	pf	fear	no	no	1	346	m	m	7	67
5	18	female	Mouth\pf_happy_jumbled_no_mouth.jpg	pf	happy	no	no	1	293	m	m	7	67
5	18	female	Mouth\cc_happy_jumbled_no_mouth.jpg	cc	happy	no	no	1	394	m	m	7	67
5	18	female	Mouth\mf_happy_jumbled_no_mouth.jpg	mf	happy	no	no	1	212	m	m	7	67
5	18	female	Mouth\cc_fear_up_no_mouth.jpg	cc	fear	yes	no	1	414	m	m	6	66
5	18	female	Mouth\r_happy_jumbled_mouth.jpg	r_	happy	no	yes	1	391	z	z	7	67
5	18	female	Mouth\mo_fear_jumbled_no_mouth.jpg	mo	fear	no	no	1	361	m	m	6	66
5	18	female	Mouth\sw_fear_up_no_mouth.jpg	sw	fear	yes	no	1	333	m	m	6	66
5	18	female	Mouth\pe_happy_up_no_mouth.jpg	pe	happy	yes	no	0	354	m	z	7	67
5	18	female	Mouth\jj_happy_jumbled_no_mouth.jpg	jj	happy	no	no	1	205	m	m	7	67
5	18	female	Mouth\mf_happy_up_mouth.jpg	mf	happy	yes	yes	0	317	z	m	7	67
5	18	female	Mouth\pf_happy_up_no_mouth.jpg	pf	happy	yes	no	1	427	m	m	6	66
10	18	female	Mouth\em_happy_jumbled_no_mouth.jpg	em	happy	no	no	1	617	z	z	7	67
10	18	female	Mouth\r_happy_jumbled_no_mouth.jpg	r_	happy	no	no	1	927	z	z	7	67
10	18	female	Mouth\sw_fear_jumbled_no_mouth.jpg	sw	fear	no	no	1	385	z	z	6	66
10	18	female	Mouth\mo_fear_up_mouth.jpg	mo	fear	yes	yes	1	377	m	m	6	66
10	18	female	Mouth\sw_happy_up_mouth.jpg	sw	happy	yes	yes	1	448	m	m	6	66
10	18	female	Mouth\jj_happy_jumbled_no_mouth.jpg	jj	happy	no	no	1	515	z	z	7	67
10	18	female	Mouth\mf_fear_jumbled_mouth.jpg	mf	fear	no	yes	1	425	m	m	7	67
10	18	female	Mouth\jj_fear_jumbled_mouth.jpg	jj	fear	no	yes	1	530	m	m	7	67
10	18	female	Mouth\mf_fear_up_mouth.jpg	mf	fear	yes	yes	0	374	m	z	7	67
10	18	female	Mouth\r_happy_up_no_mouth.jpg	r_	happy	yes	no	1	505	z	z	6	66
10	18	female	Mouth\wf_happy_up_no_mouth.jpg	wf	happy	yes	no	1	336	z	z	7	67
10	18	female	Mouth\sw_happy_jumbled_no_mouth.jpg	sw	happy	no	no	1	1013	z	z	7	67
10	18	female	Mouth\cc_happy_jumbled_mouth.jpg	cc	happy	no	yes	1	439	m	m	6	66
10	18	female	Mouth\mf_happy_jumbled_no_mouth.jpg	mf	happy	no	no	0	800	z	m	7	67
10	18	female	Mouth\r_happy_up_mouth.jpg	r_	happy	yes	yes	1	546	m	m	7	67
10	18	female	Mouth\sw_fear_up_no_mouth.jpg	sw	fear	yes	no	0	455	z	m	6	66
10	18	female	Mouth\mo_happy_jumbled_no_mouth.jpg	mo	happy	no	no	1	448	z	z	7	67
10	18	female	Mouth\cc_fear_up_no_mouth.jpg	cc	fear	yes	no	0	656	z	m	6	66
10	18	female	Mouth\wf_fear_jumbled_no_mouth.jpg	wf	fear	no	no	0	697	z	m	7	67
10	18	female	Mouth\jj_happy_up_mouth.jpg	jj	happy	yes	yes	0	712	m	z	7	67
10	18	female	Mouth\pf_happy_jumbled_no_mouth.jpg	pf	happy	no	no	1	590	z	z	7	67
10	18	female	Mouth\jj_happy_up_no_mouth.jpg	jj	happy	yes	no	0	849	z	m	7	67
10	18	female	Mouth\mf_fear_up_no_mouth.jpg	mf	fear	yes	no	0	465	z	m	6	66
10	18	female	Mouth\sw_happy_jumbled_mouth.jpg	sw	happy	no	yes	1	393	m	m	7	67
10	18	female	Mouth\r_fear_jumbled_no_mouth.jpg	r_	fear	no	no	1	626	z	z	7	67
10	18	female	Mouth\pf_happy_jumbled_mouth.jpg	pf	happy	no	yes	0	1260	m	z	7	67
10	18	female	Mouth\r_fear_up_no_mouth.jpg	r_	fear	yes	no	0	692	z	m	6	66
10	18	female	Mouth\mo_fear_jumbled_mouth.jpg	mo	fear	no	yes	0	1099	m	z	7	67
10	18	female	Mouth\mf_happy_up_no_mouth.jpg	mf	happy	yes	no	0	553	z	m	6	66
10	18	female	Mouth\wf_fear_up_no_mouth.jpg	wf	fear	yes	no	0	702	z	m	7	67
10	18	female	Mouth\pf_fear_up_no_mouth.jpg	pf	fear	yes	no	0	484	z	m	6	66
10	18	female	Mouth\wf_happy_jumbled_mouth.jpg	wf	happy	no	yes	1	483	m	m	7	67
10	18	female	Mouth\mo_fear_jumbled_no_mouth.jpg	mo	fear	no	no	0	355	z	m	7	67
10	18	female	Mouth\mf_happy_up_mouth.jpg	mf	happy	yes	yes	0	423	m	z	7	67
10	18	female	Mouth\pf_fear_jumbled_no_mouth.jpg	pf	fear	no	no	1	513	z	z	7	67
10	18	female	Mouth\pe_fear_jumbled_no_mouth.jpg	pe	fear	no	no	0	390	z	m	7	67
10	18	female	Mouth\em_happy_jumbled_mouth.jpg	em	happy	no	yes	1	362	m	m	7	67
10	18	female	Mouth\em_happy_up_no_mouth.jpg	em	happy	yes	no	0	286	z	m	7	67
10	18	female	Mouth\r_fear_up_mouth.jpg	r_	fear	yes	yes	1	317	m	m	7	67
10	18	female	Mouth\r_happy_jumbled_mouth.jpg	r_	happy	no	yes	1	347	m	m	7	67
10	18	female	Mouth\em_happy_up_mouth.jpg	em	happy	yes	yes	0	415	m	z	6	66
10	18	female	Mouth\em_fear_jumbled_no_mouth.jpg	em	fear	no	no	1	985	z	z	6	66
10	18	female	Mouth\pe_happy_jumbled_no_mouth.jpg	pe	happy	no	no	0	468	z	m	7	67
10	18	female	Mouth\wf_fear_up_mouth.jpg	wf	fear	yes	yes	0	1275	m	z	7	67
10	18	female	Mouth\em_fear_up_no_mouth.jpg	em	fear	yes	no	1	619	z	z	6	66
10	18	female	Mouth\pf_happy_up_no_mouth.jpg	pf	happy	yes	no	0	389	z	m	6	66
10	18	female	Mouth\jj_fear_up_no_mouth.jpg	jj	fear	yes	no	0	368	z	m	6	66
10	18	female	Mouth\wf_fear_jumbled_mouth.jpg	wf	fear	no	yes	1	412	m	m	6	66
10	18	female	Mouth\jj_fear_jumbled_no_mouth.jpg	jj	fear	no	no	0	574	z	m	7	67
10	18	female	Mouth\pe_fear_jumbled_mouth.jpg	pe	fear	no	yes	1	418	m	m	7	67
10	18	female	Mouth\pe_fear_up_no_mouth.jpg	pe	fear	yes	no	1	356	z	z	7	67
10	18	female	Mouth\jj_fear_up_mouth.jpg	jj	fear	yes	yes	1	472	m	m	6	66
10	18	female	Mouth\sw_happy_up_no_mouth.jpg	sw	happy	yes	no	1	496	z	z	6	66
10	18	female	Mouth\em_fear_up_mouth.jpg	em	fear	yes	yes	1	455	m	m	7	67
10	18	female	Mouth\cc_happy_jumbled_no_mouth.jpg	cc	happy	no	no	0	367	z	m	7	67
10	18	female	Mouth\cc_fear_jumbled_mouth.jpg	cc	fear	no	yes	1	451	m	m	6	66
10	18	female	Mouth\pe_happy_jumbled_mouth.jpg	pe	happy	no	yes	1	404	m	m	7	67
10	18	female	Mouth\r_fear_jumbled_mouth.jpg	r_	fear	no	yes	1	806	m	m	7	67
10	18	female	Mouth\pf_happy_up_mouth.jpg	pf	happy	yes	yes	1	561	m	m	6	66
10	18	female	Mouth\pf_fear_up_mouth.jpg	pf	fear	yes	yes	1	605	m	m	6	66
10	18	female	Mouth\mo_happy_up_mouth.jpg	mo	happy	yes	yes	1	616	m	m	7	67
10	18	female	Mouth\pe_happy_up_mouth.jpg	pe	happy	yes	yes	0	466	m	z	7	67
10	18	female	Mouth\mf_fear_jumbled_no_mouth.jpg	mf	fear	no	no	0	385	z	m	7	67
10	18	female	Mouth\pf_fear_jumbled_mouth.jpg	pf	fear	no	yes	1	380	m	m	6	66
10	18	female	Mouth\cc_happy_up_mouth.jpg	cc	happy	yes	yes	0	446	m	z	6	66
10	18	female	Mouth\mo_happy_jumbled_mouth.jpg	mo	happy	no	yes	1	511	m	m	7	67
10	18	female	Mouth\mo_fear_up_no_mouth.jpg	mo	fear	yes	no	1	933	z	z	7	67
10	18	female	Mouth\cc_happy_up_no_mouth.jpg	cc	happy	yes	no	0	642	z	m	6	66
10	18	female	Mouth\jj_happy_jumbled_mouth.jpg	jj	happy	no	yes	1	355	m	m	7	67
10	18	female	Mouth\wf_happy_jumbled_no_mouth.jpg	wf	happy	no	no	0	383	z	m	7	67
10	18	female	Mouth\sw_fear_jumbled_mouth.jpg	sw	fear	no	yes	1	379	m	m	7	67
10	18	female	Mouth\mf_happy_jumbled_mouth.jpg	mf	happy	no	yes	1	613	m	m	6	66
10	18	female	Mouth\cc_fear_jumbled_no_mouth.jpg	cc	fear	no	no	0	751	z	m	6	66
10	18	female	Mouth\pe_fear_up_mouth.jpg	pe	fear	yes	yes	0	4180	m	z	7	67
10	18	female	Mouth\pe_happy_up_no_mouth.jpg	pe	happy	yes	no	0	584	z	m	7	67
10	18	female	Mouth\sw_fear_up_mouth.jpg	sw	fear	yes	yes	1	380	m	m	7	67
10	18	female	Mouth\mo_happy_up_no_mouth.jpg	mo	happy	yes	no	0	479	z	m	6	66
[truncated: 4,403 more rows]
